# Supplementary material for: Size dependent structural and polymorphic transitions in ZnO: from nanocluster to bulk
Source: Royal Society of Chemistry journal article supplement (doi:10.1039/c7nr02818k), 2017-01-01
Supplement: c7nr02818k1.pdf [file c7nr02818k1.pdf]

## **Size Dependent Structural and Polymorphic Transitions in ZnO: from Cluster to Bulk**

Francesc Viñes,<sup>a</sup> Oriol Lamiel-Garcia,<sup>a</sup> Francesc Illas,<sup>a</sup> and Stefan T. Bromley<sup>\*a,b</sup>

*<sup>a)</sup> Departament de Ciència de Materials i Química Física & Institut de Química Teòrica i Computacional (IQTCUB), Universitat de Barcelona, c/ Martí i Franquès 1-11, 08028 Barcelona, Spain.*

*<sup>b)</sup> Institució Catalana de Recerca i Estudis Avançats (ICREA), 08010 Barcelona, Spain.*

\* Corresponding author: s.bromley@ub.edu

## Structures

Herein, we provide the cartesian coordinates of all nanoclusters (i.e. 1) Single-layered cages, SC-ZnO, 2) Multi-layered cages, MC-ZnO) and all nanoparticles of the three bulk polymorphs considered (i.e. 3) SOD-ZnO, 4) BCT-ZnO, and 5) WZ-ZnO) according to the number N of ZnO units, see a summary in Table S1.

|          | SC-ZnO | MC-ZnO | SOD-ZnO | BCT-ZnO | WZ-ZnO |
|----------|--------|--------|---------|---------|--------|
| <b>N</b> | 12     | 32     | 12      | 24      | 96     |
|          | 13     | 60     | 21      | 36      | 205    |
|          | 14     | 78     | 29      | 81      | 210    |
|          | 15     | 100    | 30      | 108     | 236    |
|          | 16     | 132    | 57      | 162     | 243    |
|          | 17     | 156    | 60      | 216     | 317    |
|          | 18     | 168    | 162     | 324     | 324    |
|          | 19     |        | 336     |         | 516    |
|          | 20     |        | 600     |         | 528    |
|          | 21     |        |         |         | 882    |
|          | 22     |        |         |         | 1026   |
|          | 23     |        |         |         |        |
|          | 24     |        |         |         |        |
|          | 25     |        |         |         |        |
|          | 26     |        |         |         |        |
|          | 27     |        |         |         |        |
|          | 28     |        |         |         |        |
|          | 29     |        |         |         |        |
|          | 30     |        |         |         |        |
|          | 36     |        |         |         |        |
|          | 48     |        |         |         |        |
|          | 64     |        |         |         |        |
|          | 80     |        |         |         |        |
|          | 90     |        |         |         |        |
|          | 108    |        |         |         |        |

**Table S1:** Summary of clusters and nanoparticles of  $(\text{ZnO})_N$ , according to the five different families of polymorphs; SC-ZnO, MC-ZnO, SOD-ZnO, BCT-ZnO, and WZ-ZnO.

**SC-12**

|    |             |             |             |
|----|-------------|-------------|-------------|
| Zn | -0.00013370 | 0.52702820  | -2.52690804 |
| Zn | -2.14364466 | -0.70149976 | -0.64444998 |
| Zn | 2.60142198  | -0.84313522 | -1.51589254 |
| Zn | 0.98832483  | -0.55116357 | 3.02599390  |
| Zn | -0.11462881 | -2.34035571 | -1.32121515 |
| Zn | 1.72630080  | 2.12904372  | -1.21937594 |
| Zn | -0.73792434 | -2.15332339 | 1.71843890  |
| Zn | 3.13191574  | 0.67726833  | 1.14359656  |
| Zn | 1.10294223  | 2.31631450  | 1.82003323  |
| Zn | 2.21163586  | -2.26696933 | 0.73839443  |
| Zn | -1.61304161 | 0.81895683  | 2.01499941  |
| Zn | -1.22343923 | 2.24275225  | -0.23934732 |
| O  | -0.97474786 | -0.65377157 | 2.96825668  |
| O  | 3.52391124  | -0.89661315 | 0.22019530  |
| O  | -0.74178436 | 2.54209917  | 1.64346779  |
| O  | 1.96298343  | 0.62953031  | -2.46919143 |
| O  | -1.11156413 | -0.95502041 | -2.29865781 |
| O  | 1.14035331  | -2.35774612 | 2.26470633  |
| O  | -0.15202906 | 2.33354531  | -1.76558385 |
| O  | 2.51069772  | 2.41043802  | 0.45103176  |
| O  | -1.52229407 | -2.43456223 | 0.04799932  |
| O  | 2.09972918  | 0.93086271  | 2.79761438  |
| O  | 1.73005473  | -2.56627215 | -1.14440577 |
| O  | -2.53563010 | 0.87242417  | 0.27888354  |

**SC-13**

|    |             |             |             |
|----|-------------|-------------|-------------|
| Zn | -3.18113976 | 1.67746866  | -1.43240073 |
| O  | -1.27429017 | 2.05749625  | -1.19332279 |
| Zn | -0.07160400 | -1.71678827 | -3.10211129 |
| O  | 0.14946307  | -2.78257240 | 0.58802682  |
| Zn | -3.82856102 | -2.99383116 | -4.63934043 |
| O  | -0.96204509 | -0.15308965 | -3.87457389 |
| Zn | -1.32432218 | -1.82684904 | 1.46184506  |
| O  | -2.42456325 | -4.36036157 | -1.16040715 |
| Zn | -0.33740021 | 0.88292983  | -2.30268429 |
| O  | 0.93654345  | -0.51645431 | -1.87992278 |
| Zn | -2.80526368 | -0.03502304 | -4.06627979 |
| O  | -3.15759645 | -2.13689713 | 1.28651649  |
| Zn | -1.43842732 | 1.15423418  | 0.55196381  |
| O  | -3.40680489 | 1.21462469  | 0.45794083  |
| Zn | -0.61685682 | -3.67622924 | -0.85200345 |
| O  | -0.31921386 | -3.53190004 | -2.78390829 |
| Zn | -2.08021744 | -4.35650240 | -3.10448741 |

|    |             |             |             |
|----|-------------|-------------|-------------|
| Zn | 0.69378636  | -1.02740738 | -0.09954868 |
| O  | -0.33248191 | -0.12937658 | 1.32271882  |
| O  | -4.30554458 | -1.28268684 | -4.38662020 |
| Zn | -4.79262571 | -0.81310825 | -2.52838938 |
| O  | -3.14476330 | -4.61360532 | -4.59303162 |
| Zn | -3.98578959 | -0.55976909 | 0.52113415  |
| O  | -4.82552173 | -1.67770869 | -0.88542385 |
| Zn | -3.55871423 | -3.09244512 | -0.41095421 |
| O  | -4.04209633 | 0.95776532  | -2.91066723 |

**SC-14**

|    |             |             |            |
|----|-------------|-------------|------------|
| Zn | 0.22756868  | -3.91560209 | 4.35988266 |
| O  | 6.15249929  | -6.25780412 | 3.11775792 |
| Zn | 2.98219745  | -3.99733193 | 0.46018816 |
| O  | -0.37217302 | -6.52568165 | 1.59928832 |
| Zn | 4.59348051  | -2.95809987 | 2.35265637 |
| O  | 4.96398363  | -3.28027924 | 4.15451980 |
| Zn | 5.13415628  | -5.24581359 | 4.28918228 |
| O  | 2.27573598  | -8.47193656 | 0.86718944 |
| Zn | 3.21123939  | -3.42270255 | 4.98934583 |
| O  | 2.97205751  | -2.30160060 | 1.49514340 |
| Zn | 2.67158817  | -8.76539589 | 2.90920012 |
| O  | 1.48133847  | -5.04494005 | 0.13062667 |
| Zn | 0.02856819  | -6.89259109 | 3.38602461 |
| O  | -0.18026085 | -3.19103514 | 2.56314105 |
| Zn | 5.65655341  | -8.01294922 | 2.74144341 |
| O  | 1.51155157  | -7.96742298 | 4.10078192 |
| Zn | 5.64067723  | -5.81307566 | 1.12917365 |
| O  | 3.55074325  | -5.32938531 | 5.41538268 |
| Zn | 0.01054237  | -4.62764707 | 1.39222437 |
| Zn | 4.12164258  | -8.44769615 | 0.62319146 |
| O  | 4.41022953  | -9.37007635 | 2.55675903 |
| O  | 0.20011741  | -5.69220999 | 4.91130352 |
| Zn | 2.05442086  | -6.38387870 | 5.08746067 |
| O  | 5.77398160  | -7.61150856 | 0.61954487 |
| Zn | 1.54491064  | -2.28522576 | 2.68884772 |
| O  | 4.88433162  | -4.15840706 | 0.82262689 |
| Zn | 1.29667629  | -6.91952481 | 0.61399429 |
| O  | 1.59807942  | -2.55483274 | 4.64955086 |

**SC-15**

|    |             |            |             |
|----|-------------|------------|-------------|
| Zn | 0.18394445  | 6.30418358 | 1.31424980  |
| O  | -0.74782441 | 1.80028672 | 2.51624223  |
| Zn | -0.44150048 | 4.87503343 | -1.27949687 |
| O  | -1.05382538 | 3.69122323 | 5.31754307  |

|    |             |            |             |
|----|-------------|------------|-------------|
| Zn | -1.65595924 | 7.49771505 | -0.23422268 |
| O  | 0.62831495  | 4.84006868 | 2.42072029  |
| Zn | -4.74421691 | 3.43945337 | 0.76090387  |
| O  | -3.38186591 | 7.25458698 | -0.90979781 |
| Zn | -3.45460600 | 5.40084437 | -1.57933869 |
| O  | 0.03486162  | 6.55780229 | -0.61937216 |
| Zn | -2.09211154 | 2.81703009 | -0.78860451 |
| O  | -3.40460700 | 2.06029973 | 0.33830598  |
| Zn | -0.31834378 | 4.98487334 | 4.04814761  |
| O  | -3.18895575 | 1.36728190 | 3.80425612  |
| Zn | -2.59121627 | 1.49580806 | 1.94614775  |
| O  | -4.88919079 | 4.97033559 | -0.34284474 |
| Zn | 0.07873134  | 3.17917939 | 1.51792547  |
| O  | -4.47000632 | 4.38508833 | 5.02700855  |
| Zn | -4.47416547 | 2.71271149 | 3.98189921  |
| O  | -4.30164130 | 6.84370027 | 2.48535186  |
| Zn | -4.41981168 | 6.60657081 | 0.61578423  |
| Zn | -2.41392643 | 7.12419407 | 2.96709279  |
| O  | -1.17825741 | 7.66645159 | 1.64016239  |
| O  | -2.10093129 | 4.23684627 | -2.13344787 |
| Zn | -4.92148916 | 5.28287150 | 3.34868184  |
| O  | -0.22343397 | 3.18391896 | -0.35061870 |
| Zn | -2.67524591 | 4.81454748 | 5.32377370  |
| O  | -1.70358982 | 6.28395543 | 4.50653728  |
| Zn | -1.46175158 | 2.19141019 | 4.27973455  |
| O  | -5.41704303 | 3.58353465 | 2.52361393  |

**SC-16**

|    |             |             |             |
|----|-------------|-------------|-------------|
| Zn | 2.26806051  | -1.82724153 | -0.84123834 |
| O  | -0.59611737 | -6.20065214 | 2.82403215  |
| Zn | -0.27740067 | -2.55073800 | 3.32346301  |
| O  | 3.22586027  | -0.92081785 | 0.58423008  |
| Zn | 3.49109530  | -4.76802922 | -1.35598107 |
| O  | 4.63553968  | -6.52970520 | 2.41304417  |
| Zn | 0.33450112  | -4.10384207 | -1.31967560 |
| O  | 3.82837871  | -2.89065989 | -1.29574552 |
| Zn | 5.29453653  | -5.08354881 | 1.29645013  |
| O  | 1.73440718  | -5.35594007 | -1.81419297 |
| Zn | 0.42887567  | -5.34685832 | 4.23562588  |
| O  | 0.42185343  | -1.07290995 | 2.27504035  |
| Zn | 1.00337463  | -7.23195198 | 2.43832814  |
| O  | 4.59069534  | -5.92213284 | -0.30769728 |
| Zn | -0.32070373 | -1.96826228 | 0.71931173  |
| O  | 3.27918734  | -1.63546641 | 3.78159311  |
| Zn | 3.57715287  | -5.94039772 | 3.88725024  |
| O  | -1.35908563 | -3.17200639 | 1.83491681  |

|    |             |             |             |
|----|-------------|-------------|-------------|
| Zn | 2.36004486  | -3.06860839 | 4.71544092  |
| O  | 1.78946682  | -7.70581302 | 0.76774605  |
| Zn | 3.59119228  | -7.09382887 | 0.87597318  |
| O  | -0.65085563 | -5.48588379 | -0.37582358 |
| Zn | 4.64039467  | -2.94746071 | 3.33599086  |
| Zn | 2.32708985  | -0.97127033 | 2.26694863  |
| O  | 5.57923109  | -3.24380653 | 1.70400396  |
| O  | 0.41218139  | -2.22316938 | -1.02130910 |
| Zn | 0.95400390  | -6.57051281 | -0.51563024 |
| O  | 3.92592615  | -4.21436319 | 4.62251661  |
| Zn | 4.59226703  | -2.28642734 | 0.38443195  |
| O  | 1.83289279  | -6.68219085 | 4.10594437  |
| Zn | -1.10464809 | -5.01652192 | 1.41687097  |
| O  | 0.50854973  | -3.51796018 | 4.76573804  |

**SC-17**

|    |            |             |             |
|----|------------|-------------|-------------|
| O  | 4.90002257 | 1.24348141  | 3.01823602  |
| Zn | 2.13892527 | -1.14834101 | 2.66089168  |
| Zn | 7.71566686 | 1.46220299  | -0.33814349 |
| O  | 1.71908071 | 0.75355318  | 2.51617220  |
| Zn | 3.60596163 | 2.33186322  | -3.17796921 |
| O  | 6.59638162 | 2.83089947  | 0.48806338  |
| Zn | 1.39838749 | 0.49309827  | -2.05919011 |
| O  | 1.85019619 | 2.32594456  | -2.60694695 |
| Zn | 4.97618596 | 3.16968963  | -0.43631566 |
| O  | 4.65546902 | 0.83716132  | -3.85226645 |
| Zn | 5.51994624 | -2.79378971 | -0.87652452 |
| O  | 7.33449174 | -2.22677174 | -0.44227262 |
| Zn | 0.74238935 | 0.28104190  | 0.89612542  |
| O  | 3.57928263 | -1.97768449 | 3.47759464  |
| Zn | 7.19998820 | -1.03305643 | -1.95850689 |
| O  | 6.17443314 | -1.92675921 | 2.57007187  |
| Zn | 4.15503388 | -0.79892701 | -3.01086125 |
| O  | 3.28964630 | 2.92350793  | 0.51502631  |
| Zn | 4.99081728 | -0.61769260 | 3.38367109  |
| O  | 3.99753196 | -3.12549209 | 0.18203493  |
| Zn | 4.53933664 | -2.78772358 | 1.96979381  |
| O  | 5.60762670 | -1.95119857 | -2.61392086 |
| Zn | 3.26204092 | 1.77294232  | 2.08078771  |
| O  | 7.90278727 | 0.52380875  | 1.34252510  |
| Zn | 6.43224951 | 1.62947242  | 1.99277023  |
| Zn | 1.83974152 | 2.63797619  | -0.66589177 |
| O  | 0.38909876 | 1.31607512  | -0.58772005 |
| O  | 1.23765842 | -1.60143674 | 0.98772023  |
| Zn | 7.36489286 | -1.30279876 | 1.22734344  |
| O  | 5.14279349 | 3.17662929  | -2.33543538 |

|    |            |             |             |
|----|------------|-------------|-------------|
| Zn | 2.47993996 | -2.02476932 | -0.38660596 |
| O  | 2.46239719 | -1.07043847 | -2.07828236 |
| Zn | 6.16371611 | 1.61835051  | -2.90196802 |
| O  | 7.69408491 | 0.80175238  | -2.12803371 |

**SC-18**

|    |             |             |             |
|----|-------------|-------------|-------------|
| O  | -1.45865105 | -1.18690221 | -5.71536338 |
| Zn | -1.26964542 | 1.88382162  | -2.01851303 |
| O  | -1.07274539 | 0.92886186  | -0.32517952 |
| Zn | 0.78875665  | 1.58390306  | -0.33642614 |
| Zn | -1.59465713 | 0.03701416  | -7.12659333 |
| O  | -0.75793415 | 0.22034580  | -8.88340006 |
| Zn | -0.39910973 | 2.08721072  | -8.35795204 |
| O  | 1.16438406  | -2.56246789 | -4.17206128 |
| Zn | 0.25877142  | -2.08446576 | -5.80227421 |
| O  | 2.71912027  | -0.05168336 | -8.73518118 |
| Zn | -1.85367336 | -0.46926732 | -3.97336132 |
| O  | 3.28760901  | 2.50676933  | -6.55814306 |
| Zn | 2.80003946  | -1.55924269 | -3.88553957 |
| O  | -1.70609404 | 1.97708491  | -6.91826976 |
| Zn | 1.38760347  | 2.96164427  | -3.25808647 |
| O  | -1.64123414 | -1.62959083 | -2.50221763 |
| Zn | 2.04548459  | -1.21003219 | -0.70240866 |
| O  | 3.35246893  | -1.09990640 | -2.14209093 |
| Zn | 3.24103204  | 0.84016433  | -1.93376737 |
| O  | 0.35313933  | 2.92126620  | -1.68230095 |
| Zn | 3.50004823  | 1.34644585  | -5.08699936 |
| O  | 3.57943481  | -0.57436894 | -5.34396521 |
| Zn | 2.66726205  | 1.75073843  | -8.24113139 |
| O  | 2.40430902  | 0.65683271  | -0.17696064 |
| Zn | 0.85761823  | -0.70672454 | -8.72393456 |
| O  | 0.45097476  | -2.18471559 | -0.72722763 |
| Zn | 2.91602030  | -1.00664309 | -7.04184766 |
| Zn | 0.10861606  | -2.49316469 | -2.62665339 |
| O  | 1.29323553  | -2.04408767 | -7.37805974 |
| O  | 0.48199082  | 3.43964638  | -4.88829941 |
| Zn | -1.02088718 | -0.87355991 | -0.81922931 |
| O  | -1.93305995 | 1.45154746  | -3.71639547 |
| Zn | -1.15366459 | 2.43642118  | -5.17482112 |
| O  | 1.19540012  | 3.06189411  | -8.33313307 |
| Zn | 1.53775881  | 3.37034319  | -6.43370730 |
| O  | 3.10502595  | 2.06408073  | -3.34499729 |

**SC-19**

|   |            |            |             |
|---|------------|------------|-------------|
| O | 1.49260052 | 3.69722382 | -1.96463804 |
|---|------------|------------|-------------|

|    |            |             |             |
|----|------------|-------------|-------------|
| Zn | 6.95038059 | 2.21590812  | 0.90198882  |
| O  | 5.18474942 | -1.07477511 | -4.15724249 |
| Zn | 5.74839186 | 3.66606436  | -4.00746739 |
| O  | 2.19141591 | 2.17236843  | 0.91045042  |
| Zn | 7.99835669 | 3.60323074  | -1.69085885 |
| Zn | 5.11466104 | 0.62456580  | -5.08354559 |
| O  | 1.18270553 | 2.07165549  | -4.74856477 |
| Zn | 3.73799973 | 1.08093233  | 1.31062655  |
| O  | 0.57315214 | 0.53305294  | -1.80742497 |
| Zn | 7.87521599 | 1.38610394  | -3.69740026 |
| O  | 5.56865715 | 1.03739735  | 1.55190483  |
| Zn | 3.68261018 | -1.56337659 | -0.66998641 |
| O  | 7.12567989 | 3.87304424  | 0.07049599  |
| Zn | 3.47052960 | -1.77939219 | -3.85934794 |
| O  | 2.67762122 | -2.19918252 | -2.13800264 |
| Zn | 3.07724006 | 4.52058696  | -2.70017636 |
| O  | 8.01439868 | -0.32912019 | -2.78889884 |
| Zn | 2.43573594 | 3.59545047  | -0.24972740 |
| O  | 3.55366755 | 1.19295140  | -5.98514414 |
| Zn | 8.69100543 | 0.67084032  | -1.25860130 |
| O  | 5.61016218 | -1.50853355 | -0.82974282 |
| Zn | 1.49156148 | 0.67270858  | -0.16248802 |
| O  | 9.05857613 | 2.23928940  | -2.38724466 |
| Zn | 6.31233360 | -1.12413237 | -2.58963664 |
| O  | 8.05743547 | 0.61652889  | 0.48925013  |
| Zn | 2.92051613 | 2.84091766  | -5.17288045 |
| O  | 6.57822682 | 4.56236020  | -2.57458721 |
| Zn | 6.38652758 | -0.36890814 | 0.43695275  |
| Zn | 1.91229584 | 0.36064575  | -5.32302660 |
| O  | 1.69624744 | -1.31993005 | -4.56392051 |
| O  | 3.76107600 | 4.85169530  | -0.89309466 |
| Zn | 1.23403971 | -1.01351818 | -2.68003686 |
| O  | 6.42290460 | 1.99906891  | -4.71326162 |
| Zn | 0.88599330 | 2.14992538  | -2.87312928 |
| O  | 3.91800460 | 4.21512326  | -4.36189685 |
| Zn | 5.59072231 | 4.57938805  | -0.85548021 |
| O  | 2.80225708 | -0.50374522 | 0.62541319  |

**SC-20**

|    |             |             |             |
|----|-------------|-------------|-------------|
| O  | 4.77418004  | 1.38658452  | -3.35621768 |
| Zn | 2.78847929  | 0.10033830  | -9.38675403 |
| O  | 2.25983361  | 3.51321361  | -3.79785838 |
| Zn | -1.64218830 | 0.68956473  | -4.27387285 |
| O  | -1.02160928 | 2.54372963  | -4.33427770 |
| Zn | 5.14534269  | -0.68530429 | -7.17308742 |
| O  | 4.52476370  | -2.53946920 | -7.11268250 |



|    |             |             |             |
|----|-------------|-------------|-------------|
| Zn | 3.13097698  | 2.04924253  | -2.81559579 |
| Zn | 0.37217742  | -2.04498216 | -8.63136433 |
| O  | -2.28030694 | -0.09865176 | -5.86653166 |
| Zn | 5.06080740  | 1.85994629  | -5.24512074 |
| O  | -0.72508600 | -3.07697200 | -5.03211175 |
| Zn | -0.42966989 | -2.14065618 | -3.42285147 |
| O  | 4.55946028  | 0.41124142  | -8.59389983 |
| Zn | 5.03947638  | -0.46345472 | -3.85154546 |
| O  | 2.46893101  | -3.81487438 | -4.63570918 |
| Zn | -1.53632197 | 0.46771513  | -7.59541465 |
| O  | -1.27102561 | -1.38232412 | -8.09074242 |
| Zn | 2.52437160  | 3.67544087  | -5.66044410 |
| O  | 5.78346117  | 0.10291217  | -5.58042853 |
| Zn | 4.07320147  | -3.01255063 | -5.34505632 |
| O  | 4.22824043  | 3.08123242  | -6.41484843 |
| Zn | 2.62540386  | -2.60886127 | -3.09089619 |
| O  | 1.24332078  | -3.50895335 | -7.64910188 |
| Zn | -1.55765308 | -1.85568585 | -6.20183936 |
| O  | 4.44680142  | -2.19905156 | -3.59171537 |
| Zn | 2.94426004  | -2.73151636 | -8.12210885 |
| O  | 1.11769816  | -1.98068830 | -2.21719171 |
| Zn | -0.57004695 | 3.01681116  | -6.10190382 |
| O  | 2.05783733  | -1.59983176 | -9.46671732 |
| Zn | 0.97878281  | -3.67118043 | -5.78651615 |
| Zn | 0.71467521  | -0.09607788 | -2.06020612 |
| O  | 1.44531709  | 1.60409222  | -1.98024273 |
| O  | 2.38545634  | 1.98494873  | -9.22976842 |
| Zn | 0.55889434  | 2.73577667  | -3.32485126 |
| O  | -1.05630570 | -0.40698096 | -2.85306050 |
| Zn | 3.93282445  | 2.14491659  | -8.02410874 |
| O  | 1.03422341  | 3.81913498  | -6.81125106 |
| Zn | 0.87775065  | 2.61312174  | -8.35606396 |
| O  | -0.94364688 | 2.20331193  | -7.85524472 |

**SC-21**

|    |             |             |             |
|----|-------------|-------------|-------------|
| O  | 4.17822192  | -0.12878368 | 0.08802463  |
| Zn | 1.63616828  | 1.78503389  | 3.43213455  |
| O  | -3.14973594 | 0.21931794  | 3.93762681  |
| Zn | -0.21314328 | 0.56128528  | -1.75971863 |
| O  | 1.68085215  | 0.50819831  | -2.05382191 |
| Zn | -2.76073246 | 1.92768747  | -0.33310011 |
| O  | -0.33641033 | -1.51696751 | 3.38682187  |
| Zn | -4.96171492 | -0.38642239 | 0.27281229  |
| O  | -2.87611559 | 2.58248862  | 1.49365408  |
| Zn | -1.54566227 | -2.71224235 | 2.60053220  |
| Zn | 3.31503266  | 4.30348092  | -0.68119780 |

|    |             |             |             |
|----|-------------|-------------|-------------|
| O  | 2.50753444  | 0.08957265  | 3.05575600  |
| Zn | 4.85900561  | 1.66517028  | -0.25381157 |
| O  | 2.53633434  | 3.43143368  | 3.28322506  |
| Zn | -3.42219860 | -3.02045451 | 0.71008211  |
| O  | -4.36225987 | -2.05717134 | -0.58659527 |
| Zn | -1.27668945 | 0.14093618  | 3.76698402  |
| O  | -1.05227673 | 2.17211696  | -1.15088117 |
| Zn | -3.85574962 | 1.34638112  | 2.50453698  |
| O  | 1.21513888  | -1.50958927 | 0.44121536  |
| Zn | 2.51903165  | 2.18287819  | -2.11743577 |
| O  | -3.48804703 | -2.93423519 | 2.67892437  |
| Zn | 2.46849904  | -0.51204431 | -0.60021282 |
| O  | -0.27314195 | 1.72041954  | 3.38278824  |
| Zn | -3.01290049 | -0.95636287 | -1.47841811 |
| O  | -1.16106644 | -1.10496814 | -1.72217853 |
| Zn | 1.19073782  | -1.08768057 | 2.30982611  |
| O  | 4.28306086  | 2.84256135  | -1.58616826 |
| Zn | 4.13449064  | 3.44100299  | 2.16606254  |
| O  | -0.03494984 | 4.19273152  | 1.17086046  |
| Zn | 0.14721175  | 3.57699150  | -0.66293225 |
| O  | -5.23308352 | 0.02533452  | 2.07566463  |
| Zn | -1.09166199 | 2.90268749  | 2.11719075  |
| Zn | -0.43775994 | -2.16183174 | -0.25979085 |
| O  | -1.49987895 | -3.34239780 | 0.75060491  |
| O  | -3.98434852 | 0.68065451  | -1.03294997 |
| Zn | 1.67917878  | 4.47643904  | 1.87189376  |
| O  | 1.69379139  | 3.90110116  | -1.68551756 |
| Zn | -4.14924950 | -1.24416035 | 3.12669054  |
| O  | 5.16057486  | 1.95864724  | 1.67366483  |
| Zn | 3.98742050  | 0.41857152  | 1.95475628  |
| O  | 3.41300700  | 4.92038141  | 1.08030319  |

**SC-22**

|    |             |             |            |
|----|-------------|-------------|------------|
| O  | 1.31497669  | -2.40819146 | 5.42405084 |
| Zn | -1.29977099 | 1.71869199  | 5.05442486 |
| O  | 4.20131109  | -1.73799092 | 7.18454717 |
| Zn | 6.42663676  | 3.10175928  | 1.24046832 |
| O  | 1.15038419  | -1.23368477 | 2.20820894 |
| Zn | 3.39549003  | 2.71587958  | 0.23653758 |
| O  | 6.97804485  | 1.40969845  | 2.02789330 |
| Zn | 1.16036755  | 4.47614666  | 1.83649085 |
| O  | 6.12772135  | 2.79288613  | 4.94481264 |
| Zn | 4.66131557  | 2.48883137  | 6.16663680 |
| O  | 4.37796995  | -0.78270761 | 1.59983238 |
| Zn | -0.39160281 | -0.21528325 | 2.79036619 |
| Zn | 2.54642186  | -0.33211163 | 1.24994738 |

|    |             |             |            |
|----|-------------|-------------|------------|
| O  | -1.96521159 | 3.18061561  | 3.93322884 |
| Zn | 6.55679285  | 1.24600092  | 3.86485530 |
| O  | 2.13628586  | 1.24250351  | 0.23392553 |
| Zn | 5.46726513  | -0.57344102 | 6.24736180 |
| O  | 1.46278512  | 0.46731928  | 7.10963020 |
| Zn | 3.20251963  | -2.58819642 | 5.86479778 |
| O  | 6.19941367  | 4.76797113  | 2.03663679 |
| Zn | -1.52104589 | 2.73310369  | 2.18271952 |
| O  | 4.83271879  | 0.96301242  | 7.26118571 |
| Zn | 2.71556874  | 4.65260304  | 4.67067767 |
| O  | 1.06443872  | 4.95116379  | 3.71000654 |
| Zn | 0.57657754  | -0.72396354 | 5.86849470 |
| O  | 2.87090357  | 4.43610878  | 0.94188868 |
| Zn | 1.87586526  | -2.30474798 | 3.55680512 |
| O  | 2.95197013  | 3.33706480  | 6.03832441 |
| Zn | 5.84674578  | 4.33930609  | 3.92399772 |
| O  | 5.19742379  | 2.20545870  | 0.00305308 |
| Zn | 3.21041126  | -0.07144337 | 7.51642750 |
| O  | 6.08328510  | -0.52447232 | 4.47206295 |
| Zn | -0.38102415 | 4.14536845  | 4.58825270 |
| O  | 4.24413087  | 5.43217309  | 3.88911529 |
| Zn | 5.50517255  | 0.59675401  | 1.03661070 |
| Zn | 4.85591949  | -1.49467677 | 3.33782045 |
| O  | -0.78143313 | -0.04774779 | 4.67579674 |
| O  | -1.10378367 | 0.94833309  | 1.48596939 |
| Zn | 0.37528085  | 1.77988713  | 0.55237545 |
| O  | 3.69077797  | -2.83230363 | 3.98186635 |
| Zn | 1.41983570  | 2.32065363  | 6.56256923 |
| O  | -0.29435650 | 2.98378024  | 6.13998294 |
| Zn | 4.27945921  | 5.14877758  | 1.96256190 |
| O  | -0.25954905 | 3.57989857  | 0.96600465 |

**SC-23**

|    |             |             |             |
|----|-------------|-------------|-------------|
| Zn | -1.88978356 | 0.94827592  | -8.71361954 |
| O  | -1.58494819 | 2.38647031  | -2.32296723 |
| O  | -3.14717071 | 4.58227167  | -4.21370330 |
| Zn | 1.04813856  | 1.34407066  | -7.52334581 |
| O  | -4.94438451 | 4.51676279  | -7.13366201 |
| Zn | 0.90005667  | 0.42882190  | -4.50779815 |
| O  | -1.74424633 | 4.47536725  | -7.24700649 |
| Zn | -0.95381631 | -2.09377399 | -3.86084412 |
| O  | -0.26466493 | 1.89038224  | -8.85002399 |
| Zn | -2.83209330 | -3.22756296 | -5.43736689 |
| O  | 1.54931642  | 3.22136724  | -7.23171304 |
| Zn | -3.74456816 | -1.97114535 | -2.53064276 |
| O  | -4.04760862 | -3.10115314 | -6.83183034 |

|    |             |             |             |
|----|-------------|-------------|-------------|
| Zn | -3.40400117 | 3.65921077  | -7.81042063 |
| Zn | -3.32033658 | -1.74695564 | -8.06484441 |
| O  | -1.66686461 | -0.92627437 | -8.31202829 |
| Zn | -3.24135786 | 3.16280466  | -2.91736952 |
| O  | -5.07676604 | -0.99740241 | -8.30360091 |
| Zn | -5.66171486 | -2.05504433 | -6.74210907 |
| O  | -7.37108781 | 0.87761787  | -4.17075115 |
| Zn | -5.14226058 | 0.88392789  | -8.26463494 |
| O  | -0.14909787 | -0.53703169 | -3.20762096 |
| Zn | -1.47641048 | 0.46276474  | -2.23048547 |
| O  | -4.89711064 | 2.29703467  | -2.49192007 |
| Zn | 1.39043323  | 3.48324706  | -5.39666409 |
| O  | -2.62601157 | -3.06930195 | -3.51906661 |
| Zn | -0.45654127 | -1.34885747 | -6.86877011 |
| O  | -6.77226687 | 1.61652150  | -7.47855899 |
| Zn | -6.40273927 | 3.31033809  | -6.74180316 |
| O  | 0.08181196  | 4.57921538  | -4.44194668 |
| Zn | -1.57728448 | 4.71416878  | -5.33606002 |
| O  | 1.43261000  | 2.16019752  | -3.96645698 |
| Zn | -7.28154185 | 0.47747193  | -6.06296760 |
| O  | -2.99161686 | -0.42289098 | -1.56517467 |
| Zn | -4.73819826 | 4.67529125  | -5.19364277 |
| O  | -7.02405168 | -1.42518962 | -5.65583038 |
| Zn | -0.10017574 | 3.09571871  | -3.20523853 |
| Zn | -6.62772400 | -0.90183820 | -3.83123297 |
| O  | -3.54640712 | 1.89767132  | -8.55652741 |
| O  | -6.48751819 | 3.92424965  | -4.88463262 |
| Zn | -4.61725365 | 0.52639758  | -1.95168899 |
| O  | -5.49580898 | -1.18796168 | -2.39438985 |
| Zn | -0.23500816 | 3.60925472  | -7.94371735 |
| O  | 0.94408114  | -0.12856407 | -6.36127493 |
| Zn | -6.39956259 | 2.43371416  | -3.72255953 |
| O  | -0.94547497 | -2.72712590 | -5.68475992 |

**SC-24**

|    |             |             |             |
|----|-------------|-------------|-------------|
| Zn | 0.79799739  | -2.53767029 | -2.40529032 |
| O  | 3.30209823  | 0.56354617  | -5.29148697 |
| Zn | 1.83187103  | 3.27942473  | -7.66723749 |
| O  | 0.53438862  | -1.70158998 | -0.77361997 |
| O  | 0.92787264  | 3.62971570  | -1.37004039 |
| Zn | -2.93319714 | 1.33308385  | -7.22360614 |
| O  | -1.47437201 | 0.36631347  | -8.04218887 |
| Zn | 2.92038262  | -0.22939980 | -3.58147673 |
| O  | 1.01152916  | -1.48173639 | -6.69554609 |
| Zn | 1.17156334  | -2.41206393 | -5.08232692 |
| O  | -0.06279332 | -3.39528654 | -3.90497015 |

|    |             |             |             |
|----|-------------|-------------|-------------|
| Zn | -1.09233211 | -0.74716492 | -0.36623602 |
| O  | 0.12269093  | 3.50130660  | -8.53490085 |
| Zn | 2.14988917  | 0.06622409  | -6.76132379 |
| O  | -2.90828616 | -0.61990968 | -0.70815689 |
| Zn | -3.56384799 | -1.20848644 | -5.46846903 |
| Zn | -2.68608065 | 3.97894734  | -2.67443215 |
| O  | -4.05033065 | 0.55185380  | -5.86604883 |
| Zn | 0.30965011  | 5.00572228  | -2.47337442 |
| O  | 2.71192296  | 0.82840648  | -1.97788888 |
| Zn | 1.45104335  | 0.04020157  | -0.84563502 |
| O  | 2.97564682  | 3.93192230  | -6.36493975 |
| Zn | 3.45708351  | 2.42335470  | -5.19487626 |
| O  | -2.35145311 | 2.85956542  | -1.14664984 |
| Zn | -3.28054773 | 1.24046531  | -1.23487876 |
| O  | -3.85082938 | 3.43410629  | -4.11656604 |
| Zn | 2.32429861  | 4.84784491  | -4.79607180 |
| O  | -1.88945546 | 5.46476870  | -6.27020083 |
| Zn | -3.23015397 | 4.12451638  | -5.73832898 |
| O  | -0.04393488 | 0.86829040  | 0.04580727  |
| Zn | -1.78657506 | -2.96400804 | -4.42728509 |
| O  | 0.96385249  | 5.89634129  | -4.10273429 |
| Zn | -3.67523215 | -1.17374147 | -2.39006245 |
| O  | -3.50570916 | -2.31374013 | -3.83990393 |
| Zn | -0.85233980 | -1.20541425 | -7.12381079 |
| O  | 2.29316900  | -2.00213961 | -3.56870066 |
| Zn | -0.84015458 | 5.81700318  | -4.78465496 |
| O  | -2.13324638 | -2.25315724 | -6.23057354 |
| Zn | -1.32878057 | 4.24672821  | -7.65814321 |
| Zn | -4.27429256 | 1.56166950  | -4.23388956 |
| O  | -4.46583976 | 0.61443061  | -2.62051790 |
| O  | -1.50669357 | 5.41222810  | -2.97670271 |
| Zn | 2.40298484  | 2.71176995  | -2.21589338 |
| O  | 3.27524594  | 3.56122840  | -3.64890203 |
| Zn | -0.08573683 | 1.54456512  | -8.46248844 |
| O  | 1.79509255  | 1.35523258  | -8.08371955 |
| Zn | -0.50209519 | 2.53737541  | -0.69052820 |
| O  | -2.98075041 | 3.20362086  | -7.41361329 |

**SC-25**

|    |             |             |             |
|----|-------------|-------------|-------------|
| O  | -0.68666878 | 4.80786975  | -1.16506584 |
| Zn | -0.97045334 | 2.58611135  | 4.67767344  |
| Zn | 0.85429931  | 3.74780509  | 2.22810479  |
| O  | -4.91927896 | -1.84270492 | 3.38100089  |
| Zn | -4.05991222 | 2.82164562  | 3.58981683  |
| O  | -2.46599852 | 3.71658300  | 4.19706654  |
| O  | 1.63785316  | 3.28335333  | 0.51986631  |

|    |             |             |             |
|----|-------------|-------------|-------------|
| Zn | 0.44512271  | 3.24074622  | -0.99143570 |
| O  | -4.76859919 | 3.12216682  | 1.84405976  |
| Zn | -3.98941613 | -0.43881574 | -1.16201693 |
| O  | 0.16529376  | 1.64430347  | -1.99942086 |
| Zn | -0.75836968 | -0.51658552 | 5.23905484  |
| O  | -2.79438456 | 2.76135535  | -2.95632748 |
| Zn | -2.35642837 | 4.33118997  | -1.90752849 |
| O  | -6.22050446 | 0.15231902  | 1.92458616  |
| Zn | -5.22783504 | -1.46833375 | 1.50427941  |
| O  | 0.61645143  | -1.64742825 | -2.05735039 |
| Zn | 2.50386743  | -0.92673880 | 1.06164511  |
| Zn | 1.27707143  | 0.09359123  | -1.69464550 |
| O  | 1.35847332  | -2.41847411 | 1.26495231  |
| Zn | -1.31874722 | -1.75834485 | -2.08034384 |
| O  | -1.31617452 | -3.18701803 | -0.75830930 |
| Zn | -1.92129343 | 5.03542705  | 2.99382148  |
| O  | 0.64894920  | 2.50036539  | 3.66344942  |
| Zn | 1.45410915  | 0.77903783  | 3.45085164  |
| O  | -4.13207684 | -1.91100030 | 0.05786698  |
| Zn | -2.46430444 | -2.69797896 | 0.65606686  |
| O  | -0.14625316 | 5.34597578  | 2.23852000  |
| Zn | -3.16034961 | 0.56620911  | 5.59106836  |
| O  | -2.51722943 | -1.27862333 | 5.43967231  |
| Zn | -1.04465791 | 5.54856256  | 0.53776049  |
| O  | 2.87726270  | 0.56674778  | 2.23145349  |
| Zn | 0.52130936  | -2.68002299 | -0.40676994 |
| O  | -4.64396232 | 1.36382329  | 4.73119675  |
| Zn | -5.45176953 | 0.00607022  | 3.69723957  |
| O  | -1.36703530 | 1.21555610  | 5.91040426  |
| Zn | 0.02913718  | -2.06636502 | 2.63441036  |
| O  | -2.77904040 | 5.75733506  | 1.42462158  |
| Zn | -4.05539546 | 4.53681573  | 0.73620909  |
| O  | -2.53516035 | -0.37974597 | -2.41069810 |
| Zn | -1.62828060 | 1.32325556  | -2.59473242 |
| Zn | -3.08793839 | -2.07646312 | 3.81642375  |
| O  | -1.80692799 | -2.55644920 | 2.45095766  |
| O  | 0.61467506  | -0.86882100 | 4.02430397  |
| Zn | -4.35383629 | 2.59057564  | -1.80490501 |
| O  | 2.76937927  | 0.18702599  | -0.52810914 |
| Zn | 2.61250810  | 1.69766453  | 0.65931114  |
| O  | -5.06594138 | 1.12501973  | -0.89197657 |
| Zn | -5.47387088 | 1.58250181  | 0.94652478  |
| O  | -4.15212411 | 4.40596449  | -1.15393250 |

**SC-26**

|   |            |            |            |
|---|------------|------------|------------|
| O | 3.53781490 | 6.03698387 | 0.10608953 |
|---|------------|------------|------------|

|    |             |             |             |
|----|-------------|-------------|-------------|
| Zn | -3.65487578 | -0.77243916 | -0.38285319 |
| O  | 4.09665672  | 2.97462425  | 1.48923476  |
| Zn | -1.08805901 | 5.87061459  | 2.90264196  |
| Zn | 1.83343042  | -1.05248587 | 2.52875018  |
| O  | 2.24982206  | 7.86716086  | 2.82333860  |
| Zn | 2.42037472  | 0.96899932  | 4.13976592  |
| O  | -3.93437262 | 1.78725534  | 2.87183543  |
| O  | 1.09354084  | -0.42971174 | 4.22742248  |
| Zn | 1.93251516  | 6.50620112  | -0.86581559 |
| O  | -1.02186082 | 7.46949292  | 1.89687680  |
| Zn | -1.03077636 | -1.59315295 | 1.27783825  |
| O  | -2.08111234 | -1.92984997 | -0.26047346 |
| Zn | -4.40056733 | 1.81866067  | 0.98075110  |
| O  | -0.91840957 | 2.18626475  | 4.17093364  |
| Zn | -1.30985331 | -0.84781663 | -1.66919407 |
| O  | -1.79460042 | -0.84091295 | 2.88761276  |
| Zn | 1.86547827  | 6.27436361  | 3.91885778  |
| O  | -2.96436481 | 0.14852870  | -1.95667736 |
| Zn | 0.42237176  | 1.53200692  | -2.68340248 |
| Zn | -0.61618369 | 0.30877331  | 3.90364053  |
| O  | -3.67900249 | 2.95451909  | -0.33149342 |
| Zn | -2.65268212 | 1.99365267  | -1.66469880 |
| O  | 3.61880755  | 5.56749439  | 3.46940404  |
| Zn | 0.51412854  | 3.42792152  | 4.34210540  |
| O  | 4.08375992  | 3.43768514  | -1.73843400 |
| Zn | -0.96507280 | 6.96338045  | 0.01279310  |
| O  | -2.29519764 | 4.52243050  | 2.29396229  |
| Zn | 2.44756610  | 3.95401167  | -2.66038899 |
| O  | -1.77035997 | 5.50938954  | -0.83719945 |
| Zn | 1.58472474  | -0.61071143 | -0.52071032 |
| O  | 3.24718189  | 0.34109036  | -0.46401272 |
| Zn | 3.74823455  | 1.11070882  | 1.24302186  |
| O  | 0.42865796  | -0.28346708 | -2.01857089 |
| Zn | 4.05395985  | 4.17686067  | -0.00133774 |
| O  | 0.74232930  | 7.84440878  | -0.26447539 |
| Zn | 0.80936487  | 8.09548575  | 1.67517043  |
| O  | -4.69219414 | -0.12050233 | 1.01551640  |
| Zn | 3.47469521  | 6.66703877  | 1.87474351  |
| O  | 3.42629846  | 0.02221007  | 2.75017554  |
| Zn | -2.68101672 | 4.39536702  | 0.43558548  |
| O  | 2.34053625  | 2.81303094  | 4.38919026  |
| Zn | 3.38959885  | 1.62586168  | -1.82011850 |
| Zn | -3.47456669 | -0.07532532 | 2.55430024  |
| O  | 0.25669149  | 5.32694826  | 4.18520262  |
| O  | 0.88516023  | -1.55944859 | 0.99594853  |
| Zn | -2.44746652 | 2.87267965  | 3.24793496  |
| O  | 2.12397842  | 2.12996137  | -3.21968223 |

|    |             |            |             |
|----|-------------|------------|-------------|
| Zn | -0.51872087 | 4.53998324 | -1.92748816 |
| O  | -1.01774124 | 2.74730530 | -2.33270347 |
| Zn | 3.51007277  | 3.71861816 | 3.14619353  |
| O  | 1.22598634  | 5.29773265 | -2.20462998 |

**SC-27**

|    |             |             |             |
|----|-------------|-------------|-------------|
| O  | 3.26752522  | 1.37956019  | -3.73363820 |
| Zn | -0.60763687 | 2.25349729  | -2.29630619 |
| O  | -0.74283209 | 6.35344218  | 2.07346953  |
| Zn | 1.51996237  | 7.48644023  | -1.81920168 |
| O  | 1.41713638  | 5.20075666  | 4.21484580  |
| Zn | -2.36897894 | 4.77612692  | -1.50403510 |
| Zn | 1.87068564  | 0.37886339  | -2.78302813 |
| O  | 4.73154308  | 3.82863422  | -2.06235827 |
| Zn | -1.13940512 | 7.53868304  | -1.48939063 |
| O  | 3.92899114  | 3.03877808  | 5.48924452  |
| O  | -2.60090663 | 4.09621126  | 0.30221627  |
| Zn | -0.01975903 | 4.83383382  | 2.99826662  |
| O  | 2.00695895  | -0.41205339 | -1.09363295 |
| Zn | 1.89917701  | 2.70107385  | -4.04855045 |
| O  | 2.45424119  | 6.95091164  | 1.64582844  |
| Zn | 3.44685187  | 1.29530882  | 4.81726245  |
| O  | 1.89093552  | 4.54979096  | -3.75362621 |
| Zn | -1.31212651 | 2.81505265  | 0.79948991  |
| O  | 0.99495528  | 0.13310175  | 1.99711007  |
| Zn | 3.33826977  | 5.01819494  | -2.57519648 |
| O  | 4.62960225  | 5.85548459  | 3.85530784  |
| Zn | 5.76825219  | 5.48797140  | 2.33935933  |
| Zn | 0.13006519  | 5.23246796  | -3.33534985 |
| O  | 0.02720772  | 7.08660758  | -2.99315028 |
| Zn | 3.82244975  | -0.47144011 | -0.45571682 |
| O  | 0.47678255  | 1.42898727  | -3.60494940 |
| Zn | 0.64449061  | 7.34649777  | 1.15784104  |
| O  | 5.42114521  | 5.82635077  | 0.53410053  |
| Zn | 2.85053828  | 6.14989701  | 3.33511604  |
| O  | -0.60589231 | 1.59405455  | -0.49405776 |
| Zn | 5.34540532  | -0.18148082 | 2.49820415  |
| O  | 3.18455616  | 6.66791428  | -1.60072842 |
| Zn | 3.70023985  | 6.60171835  | 0.24854180  |
| O  | 6.64355180  | 4.04647954  | 3.34655630  |
| Zn | 0.72452671  | 0.37591837  | 0.11282553  |
| O  | 6.80531752  | 0.76161085  | 1.84444256  |
| Zn | 4.53896814  | 1.95966760  | -2.46758950 |
| O  | -2.63352772 | 6.61331199  | -0.87394238 |
| Zn | 5.80294627  | 4.26799291  | -0.54136299 |
| O  | 4.11316198  | -1.11932648 | 1.28250741  |



|    |             |             |             |
|----|-------------|-------------|-------------|
| Zn | 6.39340944  | 1.18256236  | -0.03326864 |
| O  | 1.54982064  | 1.82625673  | 4.77091198  |
| Zn | -2.11450752 | 5.88897930  | 0.87757664  |
| O  | 0.35237000  | 8.26626457  | -0.46471610 |
| Zn | 5.14288183  | 4.09216230  | 4.56422968  |
| Zn | 2.12006370  | 3.65329220  | 4.99382040  |
| O  | -1.26127828 | 4.00061902  | -2.80179973 |
| O  | 5.20371820  | 0.55687943  | -1.32515244 |
| Zn | 6.95875327  | 2.65890148  | 2.16317804  |
| O  | -0.46236715 | 3.04947473  | 2.49419651  |
| Zn | 0.59367581  | 1.61754487  | 3.16601943  |
| O  | 6.97156980  | 3.00376018  | 0.22039903  |
| Zn | 2.67327043  | -0.57223286 | 2.44005585  |
| O  | 3.98406600  | -0.19641593 | 3.86504588  |

**SC-28**

|    |             |             |             |
|----|-------------|-------------|-------------|
| O  | -3.15522145 | 5.35113935  | 0.87341970  |
| Zn | -5.65122053 | 3.87516449  | 4.62894095  |
| O  | 2.81857027  | 5.27415540  | 3.12475929  |
| Zn | -3.32433435 | 7.02759393  | 1.68207425  |
| O  | -4.23422380 | 4.09487537  | 7.83430469  |
| Zn | 1.34111899  | 0.54197167  | 6.59646040  |
| O  | -2.11447722 | 1.72643112  | 6.99231306  |
| Zn | -3.78887758 | 2.61286689  | 6.76804311  |
| Zn | 0.67934729  | 2.46747435  | -0.03504022 |
| O  | -0.48734748 | 7.62123071  | 7.18002011  |
| Zn | 3.50468603  | 1.12295011  | 4.47415410  |
| O  | -2.75620032 | -0.04104405 | 4.27465204  |
| O  | 1.62943078  | 5.28359342  | 6.25371075  |
| Zn | 1.00571565  | -1.04660803 | 4.43100479  |
| O  | -1.92111311 | 8.22787612  | 2.23842619  |
| Zn | 0.44797439  | -0.33416915 | 1.24683804  |
| O  | -3.61264614 | 2.28597218  | 2.02482391  |
| Zn | -5.48790138 | 6.44661549  | 3.80438056  |
| O  | -4.53876198 | 7.82553296  | 3.01089024  |
| Zn | -4.24960432 | 4.07309382  | 1.82242806  |
| O  | 1.17200609  | 2.21842625  | 7.40511495  |
| Zn | -0.27811315 | 7.33238961  | 2.40687821  |
| O  | 0.77298496  | 7.61060965  | 4.00388262  |
| Zn | -0.64953318 | 2.76116530  | 7.64651318  |
| Zn | -0.32838125 | 8.25879508  | 5.36755597  |
| O  | -1.10732400 | 3.01448579  | -0.00216116 |
| Zn | -2.98893101 | 8.61617362  | 3.84752986  |
| O  | 3.67488523  | 2.86085509  | 5.38749724  |
| Zn | 1.82234000  | 6.09916749  | 4.53865302  |
| O  | -0.06210225 | -0.65831052 | 6.04010846  |

|    |             |             |            |
|----|-------------|-------------|------------|
| Zn | 3.66800518  | 3.69440111  | 3.64959370 |
| O  | -2.15494260 | 8.98924023  | 5.45900046 |
| Zn | -2.66256265 | 5.10209125  | 8.31357489 |
| O  | -5.65810059 | 4.70871051  | 2.89103742 |
| Zn | 1.80566223  | 4.95669871  | 1.51049155 |
| O  | 0.13126187  | 5.84313448  | 1.28622159 |
| Zn | -4.93302196 | 5.72904920  | 6.98540750 |
| O  | 2.25100845  | 3.47469023  | 0.44422998 |
| Zn | -3.80555536 | 1.47039811  | 3.73988165 |
| O  | 1.62736291  | 0.78704144  | 0.36128456 |
| Zn | 0.18483461  | 5.87518254  | 7.35098262 |
| O  | 2.55554662  | -0.25596736 | 5.26764441 |
| Zn | 2.26638896  | 3.49647178  | 6.45610659 |
| O  | 4.01358984  | 1.94832192  | 2.80581848 |
| Zn | 2.94980660  | 1.84051640  | 1.29312716 |
| O  | -1.49586789 | -0.05166511 | 1.09851455 |
| Zn | -1.65483411 | -0.68922950 | 2.91097868 |
| Zn | -1.33368217 | 4.80840029  | 0.63202148 |
| O  | -0.87589136 | 4.55507981  | 8.28069582 |
| O  | -4.80178563 | 2.29541020  | 5.15377537 |
| Zn | -1.70510220 | 0.23717599  | 5.87165645 |
| O  | -5.99680518 | 5.62124367  | 5.47271618 |
| Zn | -2.16804997 | 1.69438307  | 0.92755204 |
| O  | 0.17172723  | -1.41967464 | 2.81953420 |
| Zn | -2.43118975 | 7.90373475  | 7.03169662 |
| O  | -3.61057827 | 6.78252416  | 7.91725010 |

**SC-29**

|    |             |             |             |
|----|-------------|-------------|-------------|
| O  | -5.97593788 | 4.10183324  | -4.52287903 |
| Zn | 1.48637086  | 2.83860268  | -6.14201554 |
| Zn | -3.54364187 | -2.08218186 | -1.77451040 |
| O  | 0.75134314  | 2.79420462  | -2.36058277 |
| Zn | 0.22906901  | 1.14195795  | -8.66224178 |
| O  | -2.08890259 | -1.98799872 | -8.83343808 |
| Zn | -2.58190639 | -3.13572115 | -7.33875664 |
| O  | -6.28904140 | 2.29461923  | -7.24538547 |
| O  | -6.62058134 | 0.93321823  | -4.03323007 |
| O  | -0.13139794 | 5.99502552  | -3.59621161 |
| Zn | -0.96963189 | 2.76855167  | -1.48709786 |
| O  | -5.76643627 | -2.18836178 | -4.49219314 |
| Zn | -5.48215655 | -1.91733186 | -6.40980221 |
| Zn | -1.73843111 | 5.73302736  | -2.72253170 |
| Zn | -0.27800825 | -1.89126892 | -8.11554481 |
| O  | -0.99427956 | 5.69614592  | -7.08368921 |
| Zn | -4.53167673 | 5.40859864  | -4.49993162 |
| O  | 1.70963233  | 1.20938975  | -5.16808356 |

|    |             |             |             |
|----|-------------|-------------|-------------|
| Zn | -5.67303251 | 3.83624343  | -6.43876467 |
| O  | -2.29029906 | 4.10706209  | -8.86113164 |
| Zn | 1.14040174  | -1.94966712 | -3.37321728 |
| O  | -4.80314083 | 2.62220654  | -1.83146450 |
| Zn | -5.40426732 | 0.95553378  | -8.34069242 |
| O  | -1.30676334 | 1.08495771  | -9.73422548 |
| Zn | -1.42499190 | -3.51179917 | -2.67888571 |
| O  | 0.19645402  | -3.67292353 | -3.54995973 |
| Zn | -5.93326735 | 2.60543607  | -3.39245037 |
| O  | -4.69423838 | -0.61049665 | -1.81448952 |
| Zn | 1.22265934  | 1.20282413  | -3.32324055 |
| O  | 1.70230352  | -2.07647691 | -5.20759281 |
| Zn | -3.76658365 | 1.04055235  | -1.50641864 |
| O  | -4.45064377 | 5.33982602  | -6.43952440 |
| Zn | 0.26790977  | -3.40855453 | -5.45853852 |
| Zn | -2.71169191 | 2.40994134  | -9.44710135 |
| O  | -1.87637625 | 1.10483203  | -1.24345279 |
| O  | 0.94098364  | -0.48633995 | -7.93690606 |
| Zn | -2.62084924 | -0.32814757 | -9.43594294 |
| O  | -1.91239410 | 4.38580648  | -1.29431754 |
| Zn | -6.64351201 | 0.92640535  | -5.90196124 |
| O  | 1.48039460  | 4.48423827  | -5.23528774 |
| Zn | 0.92184352  | 4.33993566  | -3.40013719 |
| O  | -3.65253465 | 5.79491018  | -2.91758175 |
| O  | 0.86116054  | -0.41007261 | -2.34761011 |
| Zn | 1.59511706  | -0.44037802 | -6.12527918 |
| O  | -4.03274568 | 0.99517934  | -9.57038093 |
| Zn | -4.23597408 | -3.39281268 | -4.45815874 |
| O  | -6.19850841 | -0.42834544 | -7.23218780 |
| Zn | -2.86070432 | 5.23426267  | -7.37929248 |
| Zn | -0.47578477 | 4.14127228  | -8.14464979 |
| O  | -1.69082491 | -2.16904091 | -1.26122905 |
| Zn | -5.82167363 | -0.68268721 | -3.37534645 |
| O  | -4.16181001 | -3.33613861 | -6.39816803 |
| O  | 0.83325252  | 2.82141299  | -7.95443796 |
| O  | -3.33075606 | -3.70533669 | -2.87422022 |
| Zn | -0.03722597 | 5.71560384  | -5.50224840 |
| O  | -0.68939447 | -3.46736752 | -7.03871270 |
| Zn | -3.75475347 | 4.16809042  | -1.80657056 |
| Zn | -0.85709849 | -0.49539760 | -1.47354355 |

**SC-30**

|    |            |             |             |
|----|------------|-------------|-------------|
| Zn | 1.87974768 | -8.43608604 | 1.45188365  |
| O  | 0.60985971 | 0.64962832  | 2.99736297  |
| O  | 3.16648005 | -1.29490026 | 3.68841411  |
| Zn | 4.64250272 | -5.00817247 | -1.83514073 |

|    |             |             |             |
|----|-------------|-------------|-------------|
| Zn | -0.66909387 | -6.58687856 | 0.65506277  |
| O  | -2.09611094 | -4.36111128 | 3.41849213  |
| Zn | -0.67802722 | -8.34092189 | 3.32536577  |
| O  | 2.12861353  | -2.28115627 | -3.86046970 |
| Zn | 1.49584430  | -5.17129270 | 6.16038840  |
| O  | -1.24021570 | -1.78186718 | 1.60356025  |
| O  | 2.80178146  | -4.06653980 | 5.39813554  |
| O  | 3.83497714  | -6.94204249 | 4.19916753  |
| Zn | -2.25939074 | -6.23005342 | 3.40581625  |
| O  | -0.42825063 | -4.87366993 | 6.29719908  |
| Zn | 4.50173305  | -7.57935160 | -0.01623205 |
| Zn | -0.83041918 | -0.99654606 | -0.08649476 |
| Zn | 3.99865008  | -2.27829526 | -3.27967484 |
| O  | -0.69979019 | 0.88369599  | -0.14971383 |
| Zn | 4.53395130  | -2.16174984 | 2.68317205  |
| O  | -0.15957409 | -2.06372006 | -1.52487749 |
| Zn | 1.14945531  | -1.22334480 | -2.64499027 |
| O  | 3.73830868  | -8.76023290 | 1.30063697  |
| Zn | -0.93059992 | -3.77197106 | 4.84806964  |
| O  | 3.79327631  | -6.70854963 | -1.50520587 |
| Zn | -0.11080190 | -3.94000700 | -1.22221354 |
| O  | 4.78229576  | -1.11341063 | -2.03563614 |
| Zn | 2.14299911  | -4.15260299 | -3.37556590 |
| O  | -1.72887883 | -7.42478452 | 1.96833155  |
| Zn | 3.73098447  | 0.47433465  | -1.70677514 |
| O  | 5.46513295  | -4.00596057 | -0.42343189 |
| Zn | 3.95433542  | -5.02401471 | 4.19423993  |
| O  | 1.00852513  | -5.13407434 | -2.24899488 |
| Zn | 0.83561581  | 1.54372833  | -1.13921931 |
| O  | 1.27457265  | -7.09895864 | 6.15930502  |
| Zn | 4.88080433  | 0.55077204  | 1.14212133  |
| Zn | -0.64064390 | -6.77498588 | 5.92332423  |
| O  | 1.15913661  | -8.70340161 | 3.22245489  |
| O  | 1.25655396  | 2.80678562  | 0.30379217  |
| Zn | 4.60253515  | -7.60419796 | 2.62757315  |
| O  | 4.10497300  | -4.19678505 | -3.44663636 |
| Zn | 2.52730535  | 0.42867834  | 3.14272783  |
| O  | 4.87418987  | -4.02199183 | 2.86569024  |
| Zn | -0.26200758 | -1.05453473 | 3.06828146  |
| O  | 3.75935040  | 1.60426436  | 2.33106907  |
| O  | 5.39386441  | -1.24466981 | 1.22903304  |
| Zn | 5.31560685  | -2.11561134 | -0.48571742 |
| O  | -0.99499412 | -4.74553150 | 0.25381700  |
| Zn | 2.03534456  | -2.48176922 | 4.64669427  |
| O  | 0.15240139  | -2.23544593 | 4.50137572  |
| Zn | 3.03574634  | 2.45206501  | 0.72416903  |
| Zn | 0.19775528  | 1.59344866  | 1.42513608  |

|    |             |             |             |
|----|-------------|-------------|-------------|
| O  | 1.89404496  | 0.52908906  | -2.30661501 |
| Zn | 5.50468351  | -4.89517456 | 1.27135290  |
| O  | -1.81628718 | -7.60332564 | 4.74019698  |
| O  | 4.41625835  | 1.64908997  | -0.39710968 |
| O  | 0.94710030  | -7.45102850 | 0.09506832  |
| Zn | 1.88976718  | -6.53090054 | -1.26930319 |
| O  | 5.72270075  | -6.77064965 | 1.29559477  |
| Zn | 2.11795271  | -7.74316842 | 4.59813002  |
| Zn | -1.52655223 | -3.65348716 | 1.72555093  |

**SC-36**

|    |             |              |             |
|----|-------------|--------------|-------------|
| O  | 9.57614329  | -4.32496581  | 0.85123235  |
| Zn | 8.98338306  | -9.77774665  | -6.19317444 |
| O  | 3.47748161  | -4.82397657  | -4.31070182 |
| Zn | 6.34014035  | -8.47708857  | -7.68332125 |
| O  | 1.90267289  | -7.19010338  | 0.03838014  |
| Zn | 6.69573809  | -3.35371265  | -2.89072746 |
| O  | 6.57487165  | -3.68679887  | -4.76280447 |
| O  | 7.25526667  | -13.07900641 | -2.81670886 |
| Zn | 10.28546101 | -5.75755647  | -0.14517356 |
| Zn | 8.49113098  | -3.19591157  | -0.29954959 |
| O  | 7.01936623  | -3.25481663  | 0.96315092  |
| Zn | 2.58670448  | -6.45680521  | -4.71707993 |
| O  | 8.45932133  | -3.09181395  | -2.16910257 |
| Zn | 3.99611599  | -6.42826490  | -7.50895014 |
| O  | 8.22643649  | -8.47275157  | -7.35556061 |
| Zn | 10.11839158 | -11.93930381 | -1.21889593 |
| O  | 2.14060799  | -4.74399310  | -1.32326119 |
| Zn | 11.62020727 | -6.87631055  | -2.91436005 |
| O  | 10.83958080 | -5.42829139  | -1.94474282 |
| Zn | 9.08088608  | -6.76326065  | -7.45042098 |
| O  | 9.88915858  | -4.08530707  | -4.86940617 |
| Zn | 11.51158200 | -7.92229866  | -5.86093168 |
| O  | 8.72247085  | -12.60608640 | -0.03786293 |
| Zn | 1.55626217  | -6.54233221  | -1.76531470 |
| O  | 5.62720425  | -11.45319803 | -0.32632870 |
| Zn | 6.07637854  | -11.27518113 | -6.00798737 |
| O  | 8.11765290  | -5.08328571  | -7.38782486 |
| Zn | 5.45761923  | -3.84282042  | 0.09302391  |
| O  | 5.16438044  | -3.52881541  | -1.77104432 |
| Zn | 8.16209273  | -4.15897980  | -5.70043737 |
| O  | 4.49875214  | -5.17956527  | 1.11726224  |
| O  | 5.53425595  | -7.00164891  | -8.54699634 |
| Zn | 4.88374730  | -4.25046610  | -5.47162180 |
| Zn | 11.09299324 | -5.31878575  | -5.61279836 |
| O  | 4.79265883  | -8.51251160  | 0.95209484  |

|    |             |              |             |
|----|-------------|--------------|-------------|
| Zn | 10.87500537 | -8.95870407  | -0.49830941 |
| O  | 4.69273176  | -4.61999196  | -7.31671071 |
| Zn | 3.54365171  | -4.25033469  | -2.49021459 |
| O  | 3.85123917  | -12.73108986 | -2.78424261 |
| Zn | 3.16600426  | -8.59420839  | -0.06157566 |
| O  | 10.16201518 | -11.67971175 | -3.07780855 |
| Zn | 5.45821061  | -6.80862323  | 1.47773890  |
| O  | 5.22726707  | -9.76560541  | -6.81704244 |
| Zn | 10.90530181 | -9.98475514  | -3.57456547 |
| O  | 2.60981945  | -10.20354205 | -4.77946553 |
| Zn | 8.47867923  | -7.92257997  | 1.45197313  |
| O  | 7.92966054  | -11.21493026 | -5.51781985 |
| Zn | 8.47773972  | -12.06971020 | -3.90786855 |
| Zn | 6.36837305  | -5.33492972  | -7.97155418 |
| O  | 7.76388797  | -9.70162736  | 1.56574768  |
| Zn | 3.43313085  | -11.85086740 | -4.46480431 |
| O  | 7.27103697  | -6.56118016  | 2.05269135  |
| Zn | 2.29784936  | -9.25016983  | -3.14338551 |
| O  | 10.74370532 | -10.71715444 | 0.16232324  |
| Zn | 2.85780652  | -5.52854003  | 0.31225080  |
| O  | 12.24189555 | -6.57428501  | -4.66643244 |
| Zn | 3.55729255  | -9.19168628  | -6.10615548 |
| O  | 1.63889552  | -7.46461620  | -3.38790820 |
| Zn | 9.00156218  | -10.98070990 | 0.98333063  |
| O  | 11.43780585 | -8.67751964  | -2.30159154 |
| Zn | 7.89743712  | -4.82631933  | 1.70175537  |
| O  | 2.90000971  | -7.40610297  | -6.35467191 |
| Zn | 6.02544634  | -9.95553727  | 0.78152126  |
| Zn | 5.56885723  | -13.16748860 | -3.59902228 |
| O  | 10.74445630 | -9.57925505  | -5.44455249 |
| O  | 4.95886522  | -12.65954669 | -5.36507924 |
| Zn | 4.07203896  | -11.41761565 | -1.44285666 |
| O  | 2.95143799  | -9.87112116  | -1.46735504 |
| Zn | 9.84668214  | -4.16188248  | -2.95522705 |
| O  | 10.08410527 | -7.53970495  | 0.50971806  |
| Zn | 7.09502529  | -12.49497362 | -0.97611805 |
| O  | 10.91920809 | -6.55681904  | -7.10462336 |

**SC-48**

|    |             |             |             |
|----|-------------|-------------|-------------|
| O  | 4.27695561  | 11.55198258 | 1.78035626  |
| Zn | 1.44850954  | 11.01539279 | -1.33394316 |
| Zn | 6.53392772  | 9.82595110  | -0.78755094 |
| O  | -0.02075067 | 9.94692509  | -0.73183578 |
| Zn | 2.31405596  | 8.60366261  | 3.24171652  |
| O  | 6.56906258  | 9.34163487  | 1.04690450  |
| Zn | 4.23510813  | 10.51936879 | -2.97655197 |

|    |             |             |             |
|----|-------------|-------------|-------------|
| O  | 1.26845463  | 9.95666213  | 2.35930125  |
| O  | 4.21025642  | 8.65930172  | 3.29549295  |
| Zn | 4.22679642  | 11.85236671 | -0.14018201 |
| O  | 5.29643587  | 11.12101578 | -1.48913552 |
| Zn | 5.11272925  | 9.90384541  | 2.15438993  |
| O  | 2.34012806  | 10.62204880 | -2.98147601 |
| Zn | 2.35246276  | 11.30836490 | 1.65490693  |
| O  | 2.30663481  | 12.15085288 | -0.09663082 |
| Zn | 0.01337180  | 9.30604142  | 1.05463909  |
| Zn | 2.23777874  | 0.43251073  | 0.68967993  |
| O  | 4.16625206  | -1.19897322 | -2.19024136 |
| Zn | 2.24609042  | -0.90048700 | -2.14669021 |
| O  | 6.49363731  | 1.00495473  | -1.55503634 |
| Zn | 1.36015775  | 1.04803427  | -4.44126227 |
| O  | 5.20443221  | 0.99521752  | -4.64617349 |
| Zn | 4.12042414  | -0.35648530 | -3.94177912 |
| O  | -0.09617537 | 1.61024501  | -3.33377664 |
| O  | 2.19593127  | -0.60010295 | -4.06722848 |
| Zn | 6.45951486  | 1.64583834  | -3.34151122 |
| O  | 2.26263046  | 2.29257776  | -5.58236557 |
| Zn | -0.06104064 | 1.12592875  | -1.49932121 |
| O  | 4.13275881  | 0.32983066  | 0.69460400  |
| Zn | 4.15883093  | 2.34821693  | -5.52858898 |
| Zn | 5.02437723  | -0.06351317 | -0.95292893 |
| O  | 1.17645108  | -0.16913609 | -0.79773664 |
| O  | -1.47972650 | 5.43728942  | 3.79000535  |
| Zn | -1.91890048 | 3.69209504  | -0.73798973 |
| O  | -1.50498184 | 2.77708975  | 2.96139371  |
| Zn | -0.35304123 | 3.87845668  | 4.07481585  |
| O  | -2.52872300 | 5.00568805  | 0.52846757  |
| O  | 1.34497802  | 7.08023087  | 3.82382624  |
| Zn | -2.22689037 | 4.45235861  | 2.28957949  |
| Zn | 2.29543966  | 2.40810136  | 3.27432207  |
| O  | -1.06083041 | 2.08530223  | -0.20257190 |
| Zn | -1.89056669 | 6.79699713  | 0.23242049  |
| Zn | -0.44112840 | 6.88109433  | 3.16433047  |
| O  | 1.29348163  | 1.37140020  | 2.04046210  |
| O  | -1.00954140 | 7.79805726  | 1.58273894  |
| O  | 1.49263819  | 3.77836262  | 4.36030111  |
| Zn | -0.48777274 | 1.93195782  | 1.61741470  |
| Zn | 2.32321823  | 5.51019596  | 4.24630387  |
| O  | 2.25348174  | 5.43788477  | -6.60778904 |
| Zn | 1.38788597  | 9.56996837  | -4.24056224 |
| O  | -1.95951326 | 7.39704680  | -1.56605438 |
| Zn | -1.29547445 | 5.59191384  | -5.84538492 |
| O  | -1.98496586 | 4.21834847  | -2.55950257 |
| O  | -2.46894594 | 6.63630184  | -4.70113415 |

|    |             |            |             |
|----|-------------|------------|-------------|
| Zn | -2.29352611 | 6.07505082 | -2.90952614 |
| O  | -0.53840054 | 3.90488765 | -5.56409428 |
| Zn | -1.26705718 | 8.12298899 | -5.05818060 |
| Zn | -0.91909074 | 8.91047059 | -2.04328019 |
| Zn | 1.38044144  | 7.13043369 | -6.41858891 |
| O  | -0.49640475 | 7.20227450 | -6.58653518 |
| Zn | 1.33106997  | 3.88723114 | -6.01741308 |
| O  | -0.48526199 | 9.33556802 | -3.86873629 |
| Zn | -0.96980054 | 3.22328874 | -3.81722885 |
| O  | 2.28254334  | 8.61499351 | -5.61409454 |
| O  | 7.95261334  | 5.51459025 | -6.07687746 |
| Zn | 6.96065970  | 9.01992184 | -3.90428679 |
| Zn | 4.14966865  | 5.44168362 | -6.53317626 |
| O  | 7.53371752  | 8.86657760 | -2.08430023 |
| Zn | 8.39178754  | 7.25978478 | -1.54888234 |
| O  | 5.12790885  | 3.87164869 | -6.11069868 |
| Zn | 4.17744722  | 8.54377812 | -5.56119410 |
| O  | 9.00160982  | 5.94619167 | -2.81533968 |
| O  | 7.48242799  | 3.15382257 | -3.86961100 |
| Zn | 6.82592810  | 7.07342302 | -6.36168801 |
| O  | 4.98024867  | 7.17351698 | -6.64717330 |
| Zn | 6.91401516  | 4.07078537 | -5.45120268 |
| O  | 5.17940523  | 9.58047927 | -4.32733411 |
| Zn | 8.69977720  | 6.49952106 | -4.57645161 |
| O  | 7.97786870  | 8.17478993 | -5.24826588 |
| Zn | 8.36345333  | 4.15488267 | -2.51929257 |
| O  | 8.43239984  | 3.55483304 | -0.72081769 |
| Zn | 7.44268766  | 7.72859110 | 1.53035672  |
| O  | 4.21940513  | 5.51399479 | 4.32091656  |
| O  | 4.19034353  | 2.33688589 | 3.32722259  |
| Zn | 5.09244546  | 3.82144582 | 4.13171670  |
| O  | 7.01128750  | 7.04699203 | 3.27722205  |
| Zn | 7.73994412  | 2.82889068 | 2.77130841  |
| O  | 8.94183289  | 4.31557780 | 2.41426200  |
| Zn | 5.14181694  | 7.06464839 | 3.73054063  |
| O  | 6.95814883  | 1.61631162 | 1.58186420  |
| Zn | 7.39197740  | 2.04140918 | -0.24359192 |
| Zn | 8.76641302  | 4.87682898 | 0.62265404  |
| O  | 6.96929165  | 3.74960517 | 4.29966300  |
| Zn | 5.08500090  | 1.38191111 | 1.95369022  |
| O  | 8.45785307  | 6.73353137 | 0.27263049  |
| Zn | 7.76836136  | 5.35996582 | 3.55851277  |

**SC-64**

|    |             |              |            |
|----|-------------|--------------|------------|
| O  | -4.34243660 | -5.76066513  | 1.58138119 |
| Zn | 0.99467687  | -10.24630669 | 0.55688116 |



|    |             |              |             |
|----|-------------|--------------|-------------|
| O  | 1.88134131  | 1.67882291   | 2.96920245  |
| Zn | -1.43899076 | -0.96198579  | -2.67205738 |
| O  | 4.01945978  | -5.36195653  | -3.52700183 |
| Zn | 7.41874317  | -2.56348698  | 1.97532928  |
| O  | 4.23078769  | -7.32245147  | 6.10248980  |
| Zn | -1.20000587 | -2.97924715  | 7.25879487  |
| Zn | 3.66540905  | -8.81048735  | 5.05822953  |
| O  | 1.98392492  | -10.51864654 | 2.15969747  |
| Zn | 3.49014511  | -7.14592871  | -3.12417348 |
| O  | 1.91670149  | -9.86296865  | -1.06214421 |
| Zn | 2.69975621  | -4.14599008  | -4.16188071 |
| O  | -0.20712254 | -1.77194972  | -3.87516554 |
| O  | 6.80197541  | -0.80249079  | 2.34796435  |
| Zn | 3.74815993  | 1.32416414   | 2.85575587  |
| Zn | 5.74132554  | -6.32563577  | 5.51198045  |
| O  | 7.57885256  | -3.82026669  | 3.39390047  |
| O  | 7.51770032  | -3.16121766  | 0.17156168  |
| Zn | 5.56634604  | -4.65814929  | -2.66874735 |
| Zn | 0.88542124  | 1.83426813   | 1.35419868  |
| O  | -0.92097283 | 0.58905575   | -1.70034459 |
| O  | -0.88885925 | -9.99830318  | 0.64819797  |
| Zn | -3.61839423 | -7.48361319  | 1.21709252  |
| O  | -3.01819755 | -1.90079259  | -2.17441683 |
| Zn | -4.41189072 | -4.48310346  | 0.17149179  |
| O  | -0.71781815 | -1.16250728  | 6.96072028  |
| Zn | 0.96082199  | 1.19174686   | 4.56279087  |
| Zn | -4.32555220 | -5.13289503  | 3.37801122  |
| O  | -2.79967065 | -3.65898347  | 6.48446003  |
| O  | 0.07123796  | -4.18224021  | 8.00394568  |
| Zn | 2.95624740  | -6.46100753  | 7.22489888  |
| O  | 4.73938606  | -9.46729255  | 3.63408972  |
| Zn | 7.60036059  | -5.02601294  | -0.16342087 |
| O  | 6.83001474  | -6.95836534  | 4.08938189  |
| Zn | 3.79260065  | -9.58903264  | -0.99781449 |
| O  | 8.35222468  | -6.10435008  | 1.23496761  |
| Zn | 7.65818184  | -5.66694051  | 2.96982548  |
| Zn | 6.52669932  | -9.94880666  | 0.49583419  |
| O  | 4.72797059  | -10.45421051 | 0.43677659  |
| Zn | 6.45295205  | -8.67642105  | 3.34249123  |
| O  | 7.53814395  | -8.82286650  | -0.72472876 |
| Zn | 3.85804135  | -10.22741003 | 2.13224230  |
| O  | 4.61907004  | -8.29589648  | -2.11827919 |
| Zn | 8.20564915  | -7.93103367  | 0.86939038  |
| O  | 6.71565155  | -5.78756054  | -1.66213294 |
| O  | 7.59651623  | -9.37869202  | 2.01643622  |
| Zn | 6.35175166  | -7.66215344  | -1.62272336 |
| O  | -3.58858985 | -0.66621843  | 5.53359029  |

|    |             |             |             |
|----|-------------|-------------|-------------|
| Zn | -5.12373849 | -2.13359090 | 2.33985526  |
| O  | -3.72369701 | 0.46919903  | -0.07832631 |
| Zn | -1.90494301 | 1.70315275  | 3.06071184  |
| O  | -4.74556957 | -2.64936893 | 0.53991882  |
| Zn | -1.75734991 | -0.13428607 | 5.75224830  |
| O  | -5.57002920 | -0.34071443 | 2.72285825  |
| O  | -0.93779522 | 1.14391114  | 4.60998310  |
| Zn | -4.50886833 | 0.82157423  | 1.58085240  |
| O  | -1.01350305 | 1.78607243  | 1.37274364  |
| Zn | -3.78233884 | -2.55984894 | 5.29091605  |
| Zn | -3.93260447 | -1.36586471 | -0.60108769 |
| O  | -3.78922271 | 1.77949420  | 3.11268021  |
| Zn | -4.44868999 | 0.29312710  | 4.17964873  |
| O  | -4.65285357 | -3.30398293 | 3.77503314  |
| Zn | -1.89664047 | 1.05275999  | -0.14116703 |
| Zn | -3.69910899 | -6.83314724 | -1.99292954 |
| Zn | -1.80111327 | -8.44443479 | -3.87309857 |
| O  | -2.31323569 | -4.18217670 | -4.36853367 |
| O  | -3.43162757 | -7.39003509 | -3.77588854 |
| Zn | 0.95220022  | -9.07208997 | -2.49107745 |
| O  | -0.93343809 | -9.42602765 | -2.53995401 |
| O  | -4.03488361 | -4.99035545 | -1.62015966 |
| Zn | -3.22451144 | -3.69618183 | -2.75112353 |
| O  | 1.76719447  | -7.77776780 | -3.61714486 |
| Zn | -1.77297329 | -9.20214679 | -0.82897225 |
| O  | -1.04672513 | -7.27464741 | -5.23207811 |
| O  | 0.96982833  | -4.75302087 | -4.66077522 |
| Zn | -2.43565396 | -6.01326298 | -4.72203671 |
| Zn | 0.61943923  | -6.63104467 | -4.62543445 |
| O  | -3.23160567 | -8.01412184 | -0.56553780 |
| Zn | -0.49458790 | -3.57065417 | -4.40419120 |
| O  | 2.07925481  | -1.69016908 | 8.50842559  |
| O  | 3.31779219  | -4.75436343 | 7.97782021  |
| Zn | 6.19957405  | -0.40270594 | 4.10142306  |
| O  | 5.46716127  | -2.33435041 | 8.50760278  |
| O  | 6.94980689  | -1.45917957 | 5.51712542  |
| Zn | 3.82675840  | 0.67851162  | 6.06746780  |
| Zn | 6.14055801  | -1.10190617 | 7.16305176  |
| Zn | 3.88405988  | -1.20574236 | 8.55038382  |
| Zn | 5.03517994  | -3.97369109 | 7.67918883  |
| O  | 4.80188754  | 0.23349977  | 7.61989266  |
| O  | 1.91710770  | 0.63172764  | 6.10668863  |
| Zn | 1.85170578  | -3.57888145 | 8.25926521  |
| Zn | 6.95741200  | -3.33616290 | 5.11908317  |
| O  | 6.12681053  | -4.61739965 | 6.24944136  |
| O  | 4.72731002  | 0.76405195  | 4.38421783  |
| Zn | 1.08568198  | -0.64530973 | 7.24126850  |

|    |             |              |             |
|----|-------------|--------------|-------------|
| Zn | 3.60444823  | 1.21409244   | -3.37998663 |
| O  | -0.77446679 | -9.78760275  | 7.13227377  |
| Zn | -3.00187106 | -5.53726577  | 6.32010922  |
| O  | 4.57321867  | 2.18535484   | -2.00142385 |
| Zn | 4.77758234  | -1.65592108  | -3.70963597 |
| O  | 1.96029754  | -9.60116385  | 5.33431385  |
| Zn | 1.56720791  | -1.10604621  | -3.94666473 |
| O  | 5.18251827  | 0.18129558   | -3.85469434 |
| Zn | 6.82398910  | -2.04611221  | -1.19721582 |
| O  | 3.04057338  | -2.27710933  | -4.20551926 |
| Zn | -2.16621766 | -8.43135252  | 7.20513653  |
| O  | 1.76686798  | 1.92792154   | -0.32636530 |
| Zn | -1.59202581 | -10.33979139 | 5.45672774  |
| O  | 5.93208277  | -2.79412823  | -2.69885390 |
| Zn | 0.87421685  | 1.18822460   | -1.83093271 |
| O  | 4.65318859  | 1.41370117   | 1.18713196  |
| Zn | 0.87386550  | -8.94697165  | 6.76354209  |
| O  | -3.87250839 | -6.29436816  | 4.81149922  |
| Zn | -0.21146277 | -6.04630724  | 7.79841554  |
| O  | -0.79535766 | -10.71806794 | 3.80866834  |
| Zn | 1.09020364  | -10.35850229 | 3.82499820  |
| O  | -3.15911490 | -8.66518296  | 2.63166859  |
| Zn | 6.12730697  | 0.24618790   | 0.91848976  |
| Zn | 3.67679088  | 1.97837027   | -0.35433984 |
| O  | 6.80789633  | -0.16328779  | -0.82853923 |
| O  | 1.80002883  | 0.73304071   | -3.44932018 |
| Zn | -1.70082282 | -9.85157182  | 2.35616933  |
| O  | 1.24590930  | -7.23287359  | 7.52061280  |
| Zn | 5.92531979  | 0.79721649   | -2.16686853 |
| O  | -2.03478624 | -6.60679738  | 7.58666113  |
| Zn | -3.54783615 | -8.13656215  | 4.42554539  |
| O  | -3.21420904 | -9.33804495  | 5.84108298  |

**SC-80**

|    |             |             |             |
|----|-------------|-------------|-------------|
| O  | 3.04943386  | -6.01697010 | 4.17581389  |
| Zn | 1.14866910  | -7.53053023 | 1.20763965  |
| O  | 4.84303509  | -5.23574752 | 1.29485708  |
| Zn | -0.37569036 | -1.05048760 | 2.29477784  |
| O  | 4.10987002  | -2.69388778 | 3.55309409  |
| Zn | 1.08773165  | -5.29858226 | -1.48580159 |
| O  | -1.92313017 | -5.07944971 | 1.77388050  |
| O  | 1.56448831  | -0.74015824 | 2.39965576  |
| Zn | -0.15218189 | -3.43956977 | 4.75467463  |
| Zn | 2.51283551  | -1.61640149 | 3.86651371  |
| O  | 0.33044790  | -6.73578549 | -0.40353019 |
| Zn | 3.26208964  | -2.81222999 | -1.02683510 |

|    |             |              |             |
|----|-------------|--------------|-------------|
| O  | 2.94871103  | -4.73816834  | -1.27848056 |
| Zn | 3.27252023  | -4.14449305  | 4.68999438  |
| O  | 0.36588406  | -7.39328136  | 3.01249056  |
| Zn | 4.75371214  | -3.33198659  | 1.79934664  |
| O  | 1.74132244  | -3.01153618  | 5.11395518  |
| Zn | -1.20232810 | -6.12236223  | 3.27873641  |
| O  | 1.71023458  | -1.52841158  | -0.73293368 |
| Zn | 3.92991164  | -6.06473832  | -0.22984154 |
| O  | -0.43765586 | -5.37204487  | 4.92562398  |
| Zn | 3.95174407  | -6.59178175  | 2.52495470  |
| O  | -0.54306646 | -4.13559045  | -1.19614953 |
| Zn | 2.67545174  | -0.75995479  | 0.79103851  |
| O  | -1.35016407 | -1.66389285  | 0.70315349  |
| Zn | -1.23379144 | -5.51678178  | -0.00193458 |
| O  | 4.32463157  | -2.00848327  | 0.41729642  |
| Zn | -0.11353042 | -2.27640400  | -0.69021525 |
| O  | -1.28079877 | -2.42084024  | 3.49823968  |
| Zn | 1.23127911  | -6.60585328  | 4.58649802  |
| O  | 3.10123414  | -7.53412504  | 1.02522910  |
| Zn | -2.19837027 | -3.14969123  | 1.92561083  |
| O  | -4.96918640 | -5.71560623  | 1.74767786  |
| Zn | 1.34698804  | -10.40202811 | 0.66121790  |
| O  | 1.86058061  | 2.32889955   | 2.82928947  |
| Zn | -1.69348698 | -0.58081556  | -2.47702413 |
| O  | 4.41466310  | -5.44618957  | -3.93072277 |
| Zn | 7.49464713  | -2.33387687  | 1.55363347  |
| O  | 4.33169263  | -7.73838661  | 6.43046698  |
| Zn | -1.51257563 | -3.26427957  | 7.34264335  |
| Zn | 3.79973669  | -9.22986726  | 5.35622347  |
| O  | 2.15371155  | -11.05209747 | 2.26061600  |
| Zn | 3.72963029  | -7.04330112  | -3.12926668 |
| O  | 2.20214765  | -9.94667156  | -0.97299379 |
| Zn | 2.93669483  | -4.28235989  | -3.47853501 |
| O  | -0.20782443 | -1.78961005  | -2.82848860 |
| O  | 6.81509933  | -0.61301430  | 1.98530746  |
| Zn | 3.58766693  | 1.53590232   | 2.60571012  |
| Zn | 5.00966790  | -6.41166361  | 5.19592037  |
| O  | 6.70623085  | -3.64479466  | 2.75668292  |
| O  | 7.99740328  | -2.99029958  | -0.16369056 |
| Zn | 5.95558856  | -4.69573116  | -3.07905409 |
| Zn | 0.81662974  | 2.48216426   | 1.23312354  |
| O  | -1.20784368 | 1.16547638   | -1.88771104 |
| O  | -0.19536056 | -9.24071780  | 0.91160034  |
| Zn | -3.36969136 | -6.77606780  | 1.50249626  |
| O  | -3.21236943 | -1.60206383  | -1.96976631 |
| Zn | -4.58153043 | -4.37485807  | 0.43771057  |
| O  | -0.66613203 | -1.90487268  | 6.23547139  |

|    |             |              |             |
|----|-------------|--------------|-------------|
| Zn | 1.05983229  | 0.89709029   | 3.85509006  |
| Zn | -4.93384209 | -5.12440621  | 3.56716390  |
| O  | -3.30618626 | -3.70384867  | 6.87301430  |
| O  | -0.17045976 | -4.41833395  | 8.03224459  |
| Zn | 2.90350088  | -6.69321288  | 7.15970835  |
| O  | 4.86550706  | -9.86259552  | 3.90476641  |
| Zn | 7.87926842  | -4.86872372  | -0.40492761 |
| O  | 5.82298759  | -6.90340059  | 3.47479429  |
| Zn | 3.79092903  | -9.02913240  | -0.33822431 |
| O  | 8.20774032  | -5.96810083  | 1.13558573  |
| Zn | 6.69664562  | -5.54601792  | 2.28863438  |
| Zn | 6.64190000  | -9.88301356  | 0.55083432  |
| O  | 4.85247449  | -10.34568292 | 0.64945794  |
| Zn | 6.31877280  | -8.80170400  | 3.29048559  |
| O  | 7.64407817  | -8.76934508  | -0.65767600 |
| Zn | 3.98381372  | -10.53159769 | 2.34600288  |
| O  | 4.62848345  | -7.57520164  | -1.46420447 |
| Zn | 8.25077461  | -7.81968586  | 0.98337619  |
| O  | 7.13106795  | -5.69742693  | -1.96092790 |
| O  | 7.70319980  | -9.27225010  | 2.11878075  |
| Zn | 6.60890513  | -7.45974521  | -1.49670709 |
| O  | -3.56826041 | -0.77078158  | 5.48528374  |
| Zn | -5.15865324 | -1.99523621  | 2.71051249  |
| O  | -3.65673829 | 0.67430822   | 0.14237600  |
| Zn | -1.96666874 | 1.82518131   | 2.85037789  |
| O  | -4.06258101 | -2.63227486  | 1.18517085  |
| Zn | -1.71017523 | -0.90033414  | 4.91813051  |
| O  | -5.60997292 | -0.18921654  | 2.86598146  |
| O  | -0.84926882 | 0.45228486   | 3.71627356  |
| Zn | -4.56722378 | 0.96020703   | 1.72818697  |
| O  | -1.08933857 | 2.40151242   | 1.26505497  |
| Zn | -4.11276312 | -2.61163515  | 5.54726125  |
| Zn | -3.30038090 | -1.23992681  | -0.06467722 |
| O  | -3.78664347 | 1.92383831   | 3.28443694  |
| Zn | -4.38953576 | 0.41818037   | 4.31721202  |
| O  | -5.14069018 | -3.30070511  | 4.08577496  |
| Zn | -1.98401856 | 1.54580799   | -0.19047353 |
| Zn | -3.62856005 | -6.46290316  | -1.82566876 |
| Zn | -1.69917456 | -8.27792592  | -3.57944691 |
| O  | -2.29566731 | -4.02557734  | -3.98800116 |
| O  | -3.32406679 | -7.23228740  | -3.50072700 |
| Zn | 1.23223577  | -9.05973205  | -2.32243558 |
| O  | -0.69502187 | -9.21235188  | -2.32525405 |
| O  | -4.26600951 | -4.71305430  | -1.39493646 |
| Zn | -3.32170329 | -3.41572147  | -2.46829455 |
| O  | 2.07563660  | -7.84882897  | -3.56644968 |
| Zn | -1.05986546 | -8.36930027  | -0.61290477 |

|    |             |              |             |
|----|-------------|--------------|-------------|
| O  | -0.94459132 | -7.09457973  | -4.97757684 |
| O  | 1.05453752  | -4.88196933  | -3.56720503 |
| Zn | -2.30603406 | -5.82468755  | -4.45377792 |
| Zn | 0.74898823  | -6.68664356  | -4.30198700 |
| O  | -2.59448772 | -7.12271993  | -0.28291633 |
| Zn | -0.51435617 | -3.66414409  | -3.29972002 |
| O  | 1.93799931  | -1.91193526  | 8.21922834  |
| O  | 3.11164425  | -5.02001232  | 8.01403215  |
| Zn | 6.11984718  | -0.28743896  | 3.70554626  |
| O  | 5.30254763  | -2.40394973  | 8.21229814  |
| O  | 6.69288220  | -1.42373683  | 5.16052282  |
| Zn | 3.85586183  | 0.59613900   | 5.67659271  |
| Zn | 5.96369887  | -1.19550672  | 6.85428248  |
| Zn | 3.68065238  | -1.26646768  | 8.24383449  |
| Zn | 4.66435619  | -4.01929360  | 7.52452355  |
| O  | 4.60669841  | 0.16600458   | 7.33259811  |
| O  | 2.05173072  | -0.07911410  | 5.25846748  |
| Zn | 1.60990625  | -3.81561658  | 8.15499139  |
| Zn | 5.99843979  | -3.11526974  | 4.50286193  |
| O  | 5.12474847  | -4.49419049  | 5.66584278  |
| O  | 4.72143280  | 1.00390574   | 4.02216780  |
| Zn | 1.21684609  | -1.43139627  | 6.47982514  |
| Zn | 3.47860827  | 1.18295385   | -3.54194523 |
| O  | -0.88438057 | -9.86442911  | 7.07068151  |
| Zn | -3.45687058 | -5.55760192  | 6.46330008  |
| O  | 4.48918210  | 2.24989132   | -2.19749374 |
| Zn | 4.92649861  | -1.62769476  | -3.65270627 |
| O  | 2.08135423  | -10.04870783 | 5.46973213  |
| Zn | 1.63614038  | -1.12994665  | -2.81850622 |
| O  | 5.04832967  | 0.19856145   | -4.05342123 |
| Zn | 7.09645040  | -2.03102578  | -1.54010390 |
| O  | 3.18608155  | -2.36962402  | -3.09990367 |
| Zn | -2.26372813 | -8.52505525  | 7.15492108  |
| O  | 1.56966402  | 2.47723024   | -0.51865737 |
| Zn | -1.69981788 | -10.35747318 | 5.32316133  |
| O  | 6.29653524  | -2.81838440  | -3.08761877 |
| Zn | 0.64254190  | 1.58326913   | -1.93535335 |
| O  | 3.96029644  | 0.86489985   | 0.79647712  |
| Zn | 0.77457912  | -9.18866223  | 6.54012384  |
| O  | -4.43911204 | -6.28868473  | 4.99600422  |
| Zn | -0.44755589 | -6.01511393  | 6.96364794  |
| O  | -0.68816402 | -10.58550938 | 3.78088507  |
| Zn | 1.22836377  | -10.67598212 | 3.87387516  |
| O  | -2.52484563 | -7.75435025  | 2.98329711  |
| Zn | 5.59350615  | -0.29159856  | 0.51158469  |
| Zn | 3.41521684  | 2.07344303   | -0.67884345 |
| O  | 6.67501922  | -0.21088589  | -1.11894878 |

|    |             |             |             |
|----|-------------|-------------|-------------|
| O  | 1.68522502  | 0.75103348  | -3.31808787 |
| Zn | -0.98434838 | -9.00145245 | 2.68823790  |
| O  | 1.11205611  | -7.23394536 | 6.55652086  |
| Zn | 5.82966571  | 0.87876542  | -2.35340839 |
| O  | -2.23197527 | -6.69153162 | 7.40313665  |
| Zn | -3.64239775 | -7.96749570 | 4.59218329  |
| O  | -3.32877156 | -9.42065938 | 5.73247893  |

**SC-90**

|    |             |             |             |
|----|-------------|-------------|-------------|
| O  | 4.86694724  | -5.29015903 | 2.52584947  |
| O  | 7.20086815  | -3.86179297 | 0.71024796  |
| O  | 5.57238114  | -6.41418899 | -0.51091906 |
| O  | 7.81184124  | -1.26293944 | -1.23823341 |
| O  | 6.87588898  | -4.13231803 | -2.53081584 |
| O  | 6.01065476  | -7.03111518 | -3.71842970 |
| Zn | 5.90705894  | -5.23597944 | 0.93956320  |
| Zn | 7.37481684  | -3.09879124 | -1.02331652 |
| Zn | 6.28631177  | -5.92346445 | -2.21594340 |
| Zn | 1.59709763  | -0.75559326 | -6.02674685 |
| Zn | 4.69407999  | -0.49474895 | -5.02307843 |
| Zn | 3.47389556  | -3.42939664 | -5.77810750 |
| Zn | 6.98312548  | -0.35491391 | -2.68406030 |
| Zn | 6.16540545  | -3.21843035 | -4.03555735 |
| Zn | 5.20606911  | -5.98261041 | -5.14793750 |
| O  | 3.31290226  | -1.53961828 | -5.80718481 |
| O  | 6.10763766  | -1.32391692 | -4.06187703 |
| O  | 5.22937880  | -4.13397128 | -5.43842952 |
| Zn | 1.03353468  | -7.94418176 | 0.83643307  |
| Zn | 3.96763850  | -7.42680678 | -0.48150216 |
| Zn | -1.60421789 | -7.67492384 | -1.06538543 |
| Zn | 1.39353759  | -7.86226925 | -2.36403982 |
| Zn | 4.28094267  | -7.90297465 | -3.57389833 |
| O  | 2.84990138  | -7.43164013 | 1.05105871  |
| O  | 0.23882835  | -8.10517439 | -0.88215311 |
| O  | 3.24788406  | -8.26131715 | -2.05630325 |
| O  | 0.04647647  | -1.84752368 | -6.07084850 |
| O  | -1.24844423 | -4.68192751 | -5.00888197 |
| O  | 1.92979136  | -4.53275527 | -5.81276802 |
| O  | -2.20181545 | -6.75994945 | -2.61637867 |
| O  | 0.78226609  | -7.01714351 | -3.94794808 |
| O  | 3.73121627  | -7.23684759 | -5.31860847 |
| Zn | 0.23165654  | -3.69558011 | -5.67838187 |
| Zn | -0.92000395 | -6.18127127 | -3.88933375 |
| Zn | 2.09240874  | -6.31708899 | -5.14838112 |
| Zn | 7.61768154  | -2.73287379 | 2.17389304  |
| Zn | 8.42768605  | -0.28533807 | 0.26744526  |

Zn 9.12577561 -0.22339854 3.32375206  
O 6.63432702 -2.82826324 3.79478744  
O 8.87001252 -1.31698225 1.82681708  
O 7.11415965 3.91967143 2.32701754  
O 8.34150403 1.61021548 0.29088182  
O 9.23123563 1.71130336 3.45306162  
Zn 8.34787002 2.50112375 1.98475877  
O -1.85312379 0.84811115 -6.02727560  
O -3.63108563 3.40996683 -4.95018731  
O -5.10381547 0.56451617 -5.66988350  
O -8.32697891 0.35693085 -5.09489847  
Zn -3.53185148 1.62480168 -5.59685219  
Zn -5.06023361 3.88615339 -3.78944407  
Zn -6.71275382 1.32545694 -4.97289998  
Zn -1.66669999 -1.03910880 -5.98671032  
Zn -2.95306929 -3.85247859 -4.94932941  
Zn -4.91077834 -1.32365434 -5.63511448  
Zn -3.89617270 -5.91198853 -2.58209560  
Zn -6.01241168 -3.76909396 -3.86584092  
Zn -7.96394732 -1.54396146 -4.92221232  
O -3.19734572 -2.13275845 -5.71765238  
O -4.34613452 -4.66957398 -3.94527922  
O -6.38569395 -2.49429119 -5.25154055  
Zn 7.42542116 2.47778971 -1.12520720  
Zn 6.40386866 4.86088425 0.84229704  
Zn 6.08241499 5.20323000 -2.34825376  
Zn 4.45727783 7.16231771 -0.40600445  
Zn 4.64209303 7.75198650 -3.48465868  
O 6.90152589 4.29251559 -0.90321514  
O 5.05289803 6.16976690 1.09797609  
O 5.51158414 7.00612246 -2.00451221  
O 0.08964912 8.07788740 -2.35728821  
O 2.76603819 8.02405494 -0.39242290  
O 3.01676522 8.81004664 -3.57462687  
Zn 1.94278836 8.44473402 -2.06722677  
O 6.87261831 1.53719684 -2.67775887  
O 4.54998179 1.39473743 -5.03045644  
O 5.60313058 4.28763149 -3.93945984  
O 1.42439927 1.13292148 -6.05294926  
O 2.82368572 4.08842428 -5.73825942  
O 4.30099910 6.97734464 -5.23943164  
Zn 5.71552136 2.39502351 -3.91213919  
Zn 2.94333227 2.19666549 -5.65254774  
Zn 4.31412182 5.09609510 -5.09416032  
Zn -3.27536687 6.32042913 -2.53183388  
Zn -2.05946125 4.47068936 -4.93696702  
Zn -0.39532286 7.06391163 -3.88580737



Zn -0.29684621 1.92940171 -5.98749406  
Zn 1.09594040 4.87488063 -5.68726496  
Zn 2.48102544 7.61982651 -5.02158381  
O -2.02114467 6.08894981 -3.93860481  
O -0.46817973 3.80476446 -5.73740866  
O 0.85327605 6.74273136 -5.30866374  
Zn 3.27537194 -6.32042464 2.53166121  
Zn 2.05937421 -4.47065566 4.93674168  
Zn 0.39534716 -7.06396881 3.88573701  
Zn 0.29674428 -1.92939658 5.98738995  
Zn -1.09595691 -4.87496760 5.68718985  
Zn -2.48091008 -7.61990374 5.02151251  
O 2.02113383 -6.08894222 3.93841611  
O 0.46810113 -3.80474129 5.73721540  
O -0.85320410 -6.74281403 5.30865104  
O -6.87272904 -1.53721576 2.67804964  
O -4.55008601 -1.39480405 5.03070968  
O -5.60320283 -4.28770113 3.93961012  
O -1.42448855 -1.13289006 6.05303671  
O -2.82367350 -4.08847062 5.73826428  
O -4.30090643 -6.97741782 5.23940590  
Zn -5.71562613 -2.39508901 3.91238218  
Zn -2.94336653 -2.19670378 5.65267835  
Zn -4.31411575 -5.09616544 5.09420793  
O -0.08960815 -8.07794341 2.35722110  
O -2.76602391 -8.02407157 0.39234707  
O -3.01668763 -8.81010050 3.57454063  
Zn -1.94274293 -8.44477125 2.06711254  
Zn -7.42534594 -2.47774951 1.12541750  
Zn -6.40371346 -4.86078686 -0.84222468  
Zn -6.08234686 -5.20325852 2.34833694  
Zn -4.45724948 -7.16231763 0.40602304  
Zn -4.64202553 -7.75200742 3.48460572  
O -6.90131694 -4.29241869 0.90330296  
O -5.05280980 -6.16971831 -1.09794337  
O -5.51154461 -7.00613953 2.00453235  
O 2.20179253 6.75989756 2.61625348  
O 1.24846230 4.68193248 5.00883716  
O -0.78227784 7.01706660 3.94785714  
O -0.04655508 1.84758308 6.07085682  
O -1.92981205 4.53278425 5.81274866  
O -3.73123050 7.23689950 5.31847661  
Zn 0.92000377 6.18123264 3.88923892  
Zn -0.23166919 3.69565398 5.67834742  
Zn -2.09246195 6.31709197 5.14830572  
Zn -6.98317000 0.35490381 2.68426957  
Zn -4.69413952 0.49468987 5.02329985

Zn -6.16536825 3.21840638 4.03559841  
Zn -1.59715524 0.75563641 6.02684942  
Zn -3.47391977 3.42940723 5.77815900  
Zn -5.20610451 5.98269131 5.14785837  
O -6.10765196 1.32390135 4.06206594  
O -3.31298594 1.53962524 5.80736074  
O -5.22936418 4.13404167 5.43843527  
Zn 1.60419514 7.67493086 1.06527041  
Zn -1.03350394 7.94418749 -0.83650735  
Zn -1.39354681 7.86221977 2.36396725  
Zn -3.96759552 7.42674438 0.48133406  
Zn -4.28100097 7.90300173 3.57376918  
O -0.23884272 8.10521158 0.88209197  
O -2.84986290 7.43163014 -1.05122182  
O -3.24787582 8.26125492 2.05616337  
O -7.81181616 1.26292341 1.23840011  
O -7.20078003 3.86168550 -0.71024935  
O -6.87576382 4.13229711 2.53081612  
O -4.86695750 5.29017761 -2.52597178  
O -5.57232914 6.41411319 0.51083354  
O -6.01069478 7.03116829 3.71834828  
Zn -7.37472089 3.09875810 1.02334386  
Zn -5.90701980 5.23590174 -0.93964437  
Zn -6.28625307 5.92345420 2.21587602  
O 3.63096102 -3.40989622 4.94995326  
O 1.85299781 -0.84807426 6.02712046  
O 5.10372212 -0.56453897 5.66984113  
O 8.32688911 -0.35696281 5.09505364  
Zn 5.06017319 -3.88612723 3.78932792  
Zn 3.53172568 -1.62476562 5.59670156  
Zn 6.71268125 -1.32550631 4.97292150  
Zn 3.89618921 5.91200075 2.58207668  
Zn 2.95309038 3.85248018 4.94930559  
Zn 6.01244126 3.76914110 3.86587270  
Zn 1.66660980 1.03914936 5.98664398  
Zn 4.91071847 1.32362604 5.63508886  
Zn 7.96390333 1.54393016 4.92235748  
O 4.34615145 4.66961980 3.94529034  
O 3.19728465 2.13275825 5.71760878  
O 6.38561976 2.49429937 5.25156393  
Zn -8.42766868 0.28535016 -0.26728307  
Zn -7.61768465 2.73278644 -2.17388352  
Zn -9.12582045 0.22334465 -3.32356164  
O -8.87004237 1.31696025 -1.82666954  
O -6.63436369 2.82823512 -3.79478891  
O -8.34142316 -1.61020593 -0.29070453  
O -7.11404574 -3.91958378 -2.32692682

O -9.23124085 -1.71135033 -3.45287228  
Zn -8.34779241 -2.50109882 -1.98456679

**SC-108**

|    |             |             |             |
|----|-------------|-------------|-------------|
| Zn | -2.04871429 | 8.65614406  | -6.91418724 |
| O  | -3.91735058 | 8.37957157  | -6.56727912 |
| Zn | 11.15492322 | 3.10122654  | 3.55234560  |
| O  | 10.78137788 | 4.92518105  | 3.12140303  |
| O  | 10.86438972 | 1.72561200  | 2.25838354  |
| Zn | -1.96289196 | 6.12000796  | -8.97301328 |
| Zn | 10.75907563 | 2.23808337  | 0.43529211  |
| Zn | 9.18471706  | 8.43022372  | -6.57870785 |
| O  | 10.08676326 | 7.12777772  | 0.78771131  |
| Zn | 9.31158175  | 3.48929060  | -7.91691848 |
| Zn | 10.67934042 | 5.39469263  | 1.28592760  |
| Zn | 9.14250383  | 6.42465467  | -8.97331044 |
| O  | 10.24240917 | 0.96649150  | -0.87507811 |
| O  | 7.29590939  | 6.45298172  | -9.26813916 |
| Zn | 11.03689575 | 5.98476644  | -7.17191179 |
| O  | 10.25093596 | 7.60831537  | -7.89994563 |
| O  | 10.32030547 | 4.91513848  | -8.62907857 |
| O  | 4.56393240  | 13.67302122 | -0.48293670 |
| Zn | 9.06038952  | 8.13568568  | 2.02417205  |
| O  | 5.03359943  | -4.32432023 | -5.33758641 |
| Zn | 9.27749153  | -0.57068961 | -0.32543330 |
| O  | 11.01827535 | 4.06306035  | -0.02626398 |
| O  | 11.36913084 | 5.51463137  | -5.39221243 |
| Zn | 10.69753032 | 6.83252208  | -4.16747466 |
| O  | 10.77550719 | 6.38687891  | -2.32622232 |
| Zn | 10.95485990 | 4.55389474  | -1.85645165 |
| O  | 10.85244256 | 3.19987991  | -3.18575169 |
| Zn | 10.77259108 | 3.73013950  | -5.00346118 |
| O  | 9.75599542  | 8.37201781  | -4.75583802 |
| Zn | 10.03084038 | 7.58234235  | -1.05279114 |
| Zn | 10.17873889 | 1.49374279  | -2.69430241 |
| Zn | 8.93223897  | 1.14157266  | -5.69260056 |
| O  | 9.31150344  | 0.40663608  | -3.98426288 |
| O  | 9.09548815  | 9.13016851  | -1.62648845 |
| O  | -1.02575312 | 4.45845570  | -9.08555183 |
| Zn | 0.86817293  | 4.50907658  | -8.99007086 |
| O  | -1.10821014 | 7.65731748  | -8.22457856 |
| Zn | 0.78672833  | 7.66397630  | -8.13757579 |
| O  | 1.74460076  | 6.18981693  | -8.85924109 |
| Zn | 3.63922646  | 6.23112582  | -8.81832870 |
| O  | 4.53302480  | 7.81330653  | -8.26376270 |
| Zn | 6.42740368  | 7.80972505  | -8.22179471 |

|    |             |             |             |
|----|-------------|-------------|-------------|
| Zn | 6.51085826  | 4.71250224  | -9.06233089 |
| O  | 4.61775608  | 4.63126456  | -9.12470932 |
| Zn | -4.64738988 | 7.08700497  | -7.70503707 |
| O  | -1.12886560 | 9.78478324  | -5.70042053 |
| Zn | 0.75130267  | 11.79897288 | -3.14993143 |
| O  | 1.64297263  | 12.95178160 | -1.93550490 |
| Zn | 6.23906892  | 11.32342406 | -2.78508956 |
| O  | 7.23150393  | 10.33948786 | -4.06656365 |
| Zn | 8.72693843  | 9.32525626  | -3.47825224 |
| Zn | 6.38805614  | 9.85181065  | -5.69806054 |
| O  | 7.38529163  | 8.90969667  | -7.00809678 |
| O  | 4.51528677  | 11.97938352 | -3.24343138 |
| Zn | 3.54036332  | 12.94430094 | -1.93611247 |
| Zn | 5.83644363  | 12.43518957 | 0.24934927  |
| O  | 6.87649723  | 11.45888185 | -1.00053033 |
| O  | 4.86187387  | -1.48744113 | -6.88671463 |
| Zn | 3.95264503  | -3.02406674 | -6.25006571 |
| Zn | 6.24711418  | -3.55007383 | -4.06655551 |
| O  | 7.21770519  | -2.02712340 | -4.64298702 |
| Zn | 6.55352527  | -1.05637978 | -6.13590778 |
| O  | 7.48534098  | 0.48287931  | -6.73378302 |
| O  | 9.90062697  | 2.65497201  | -6.30155921 |
| Zn | 6.59880799  | 1.67648934  | -7.91757391 |
| O  | 7.53517400  | 3.19694708  | -8.55806529 |
| Zn | 8.07590578  | 10.12626425 | -0.37492002 |
| O  | 8.12276494  | 9.68734809  | 1.46985394  |
| O  | 8.40491963  | -1.67053749 | -1.59943662 |
| Zn | 8.35541294  | -1.12886011 | -3.41651132 |
| O  | 1.67363337  | 11.14061695 | -4.67171595 |
| Zn | 0.74331563  | 10.02987062 | -5.89341343 |
| Zn | 3.57025770  | 11.13416202 | -4.65547077 |
| O  | 1.69297312  | 9.04587001  | -7.20708885 |
| O  | 4.53408439  | 10.15628934 | -5.96209775 |
| Zn | 3.58749742  | 9.04827110  | -7.17508761 |
| Zn | 0.96717006  | 1.33170259  | -8.25127826 |
| O  | 1.96371222  | -0.19992719 | -7.74760290 |
| Zn | 3.85733733  | -0.09935713 | -7.70452047 |
| O  | 1.85304903  | 2.89137834  | -8.86917369 |
| O  | 4.76014577  | 1.44727221  | -8.32650323 |
| Zn | 3.74689280  | 2.97124884  | -8.82363807 |
| Zn | -4.57726492 | 6.69342361  | 0.76975801  |
| O  | -3.71002951 | 7.78053063  | 2.05971820  |
| O  | -4.64093490 | 7.22067455  | -1.04946639 |
| Zn | -2.75393917 | 9.31602682  | 1.49196647  |
| O  | -2.80344570 | 9.85770385  | -0.32510830 |
| Zn | -3.67601751 | 8.75785571  | -1.59911140 |
| Zn | -4.42937083 | 0.60482344  | -0.87175244 |

|    |             |             |             |
|----|-------------|-------------|-------------|
| O  | -3.49401914 | -0.94300314 | -0.29805522 |
| O  | -4.48529398 | 1.05938813  | -2.71225491 |
| Zn | -2.47443624 | -1.93909856 | -1.54962354 |
| Zn | -3.45891922 | 0.05148081  | -3.94871535 |
| O  | -2.52129475 | -1.50018171 | -3.39439742 |
| Zn | 1.74413552  | 8.28652639  | 5.77997743  |
| O  | 3.63776060  | 8.38709693  | 5.82306103  |
| O  | 5.87137517  | 11.99856509 | 2.09585693  |
| Zn | 6.80528986  | 10.43095737 | 2.61623569  |
| O  | 3.54264286  | 11.32001378 | 4.35488129  |
| Zn | 4.50792830  | 9.76279336  | 4.84708437  |
| O  | 6.28425454  | 9.53621649  | 4.21022114  |
| Zn | 7.25222507  | 7.99413817  | 4.74042897  |
| Zn | 7.50234547  | 5.29663530  | 6.54514354  |
| Zn | 9.75576168  | 5.94505222  | 4.34945469  |
| O  | 8.83008313  | 7.50533384  | 3.80109144  |
| Zn | -4.30292453 | 8.00582632  | -4.72331286 |
| O  | -3.44521220 | 9.11723922  | -3.44898991 |
| Zn | -1.90337506 | 10.08448482 | -3.99163858 |
| O  | -1.00346507 | 11.19461416 | -2.74481648 |
| Zn | -1.54019347 | 11.14146775 | -0.92307055 |
| O  | -0.68083577 | 12.28372769 | 0.32466966  |
| O  | 3.92783809  | -2.95344789 | 2.74716948  |
| Zn | 2.03121379  | -2.94699360 | 2.73092474  |
| O  | -4.29915406 | 5.53219581  | 4.37701512  |
| Zn | -3.33076568 | 7.04559489  | 3.76805639  |
| O  | -1.93370149 | 4.99022183  | 6.63352178  |
| O  | -1.88386818 | 7.70428898  | 4.80923901  |
| Zn | -0.95205224 | 9.24354782  | 4.21136350  |
| O  | 0.73959892  | 9.67460975  | 4.96217057  |
| Zn | 1.64882743  | 11.21123554 | 4.32552160  |
| Zn | -0.64564150 | 11.73724137 | 2.14201038  |
| O  | -1.61623193 | 10.21429072 | 2.71844217  |
| O  | 1.08618436  | -3.79221606 | 1.31888617  |
| Zn | 2.06110817  | -4.75713324 | 0.01156731  |
| Zn | -0.23497280 | -4.24802273 | -2.17389332 |
| O  | -1.27502742 | -3.27171616 | -0.92401367 |
| O  | -4.15452494 | -0.18485127 | 2.83129447  |
| Zn | -3.12546862 | -1.13809027 | 1.55370852  |
| Zn | -0.78658505 | -1.66464290 | 3.77351549  |
| O  | -1.63003364 | -2.15232154 | 2.14201942  |
| Zn | -0.63759848 | -3.13625764 | 0.86054535  |
| O  | 6.28230819  | -4.09656019 | -2.24921477 |
| Zn | 7.14166647  | -2.95430061 | -1.00147467 |
| O  | 3.95849887  | -4.76461313 | 0.01095922  |
| Zn | 4.85016921  | -3.61180443 | 1.22538544  |
| O  | 6.60493736  | -3.00744658 | 0.82027110  |

|    |             |             |             |
|----|-------------|-------------|-------------|
| Zn | 7.50484775  | -1.89731761 | 2.06709324  |
| O  | 6.73033759  | -1.59761513 | 3.77587473  |
| Zn | 7.65018606  | -0.46897615 | 4.98964179  |
| Zn | 9.90439729  | 0.18134005  | 2.79876855  |
| O  | 9.04668577  | -0.93007307 | 1.52444518  |
| O  | 2.05882959  | -3.13284443 | -6.27942422 |
| Zn | 1.09354436  | -1.57562363 | -6.77162647 |
| O  | -0.26990353 | -3.81139725 | -4.02040078 |
| Zn | -1.20381841 | -2.24378937 | -4.54077871 |
| O  | -0.68278175 | -1.34904715 | -6.13476294 |
| Zn | -1.65075247 | 0.19303100  | -6.66497090 |
| O  | -3.22861143 | 0.68183377  | -5.72563419 |
| Zn | -4.15429016 | 2.24211509  | -6.27399795 |
| Zn | -1.90087292 | 2.89053351  | -8.46968616 |
| O  | -0.91221164 | 1.34942442  | -7.98028541 |
| O  | -5.25096906 | 4.98728680  | 1.26120766  |
| Zn | -5.17111801 | 4.45702791  | 3.07891736  |
| Zn | -5.09605925 | 1.35464488  | 2.24293116  |
| O  | -5.17403661 | 1.80028756  | 0.40167873  |
| Zn | -5.35338797 | 3.63327183  | -0.06809211 |
| O  | -5.41680381 | 4.12410622  | -1.89827977 |
| Zn | -5.07787007 | 2.79247355  | -3.21047129 |
| O  | -5.17990749 | 3.26198556  | -5.04594666 |
| Zn | -5.15760280 | 5.94908288  | -2.35983624 |
| O  | -5.26291720 | 6.46155465  | -4.18292759 |
| O  | 1.06738705  | -1.96912062 | 4.03755149  |
| O  | 0.84132684  | 6.73989709  | 6.40196001  |
| Zn | -0.99733523 | 6.51067946  | 5.99303045  |
| Zn | 1.85457987  | 5.21592033  | 6.89909441  |
| Zn | 2.01397432  | -0.86110184 | 5.25054053  |
| O  | -1.78381989 | -0.72252865 | 5.08355204  |
| Zn | -0.90938567 | 3.47466647  | 7.13778658  |
| O  | 0.98371650  | 3.55590448  | 7.20016459  |
| Zn | 1.96224564  | 1.95604325  | 6.89378250  |
| O  | 1.06844731  | 0.37386289  | 6.33921578  |
| Zn | -0.82593160 | 0.37744359  | 6.29724906  |
| O  | -1.69443650 | 1.73418681  | 7.34359435  |
| O  | 3.85687133  | 1.99735234  | 6.93469467  |
| O  | 3.52295611  | 14.17917895 | 2.76812427  |
| Zn | 0.74341025  | 13.39069411 | -0.30757518 |
| Zn | 4.63430287  | 6.85546715  | 6.32673627  |
| O  | 0.56787289  | 12.51148825 | 3.41304140  |
| O  | 6.51368471  | 6.83774520  | 6.05574429  |
| Zn | 3.46301819  | 14.40975605 | 0.83769232  |
| Zn | 4.39596908  | 12.55739243 | 3.17412633  |
| Zn | 1.60641596  | 13.86784436 | 2.65166699  |
| O  | 1.53186298  | 14.63791587 | 0.86709248  |

|    |             |             |             |
|----|-------------|-------------|-------------|
| Zn | 4.85815619  | -1.84270165 | 3.96886673  |
| O  | 4.06960879  | -6.45074779 | -2.79163779 |
| Zn | 4.85806162  | -5.20352608 | -1.61697022 |
| Zn | 1.20550281  | -4.37022359 | -5.09867022 |
| Zn | 2.13845358  | -6.22258810 | -2.76223744 |
| O  | 2.07851565  | -5.99201051 | -4.69266936 |
| Zn | 3.99505576  | -5.68067603 | -4.57621223 |
| O  | 1.03753913  | -5.48585416 | -1.44160816 |
| O  | -4.71883275 | 3.27202989  | 6.70453488  |
| O  | -4.64946359 | 0.57885284  | 5.97540227  |
| Zn | -3.54103110 | 1.76251364  | 7.04876654  |
| O  | -5.76765846 | 2.67253632  | 3.46766889  |
| O  | 3.74842359  | 5.29579104  | 6.94463046  |
| Zn | -5.43542336 | 2.20240181  | 5.24736838  |
| Zn | 4.81474339  | 0.52319300  | 6.21302893  |
| Zn | -3.71010906 | 4.69787779  | 5.99237478  |
| O  | 3.90849858  | -0.85870027 | 5.28254148  |
| Zn | -3.58324572 | -0.24305613 | 4.65416403  |
| Zn | 4.73329926  | 3.67809246  | 7.06552628  |
| Zn | -4.58168892 | 4.52580284  | -8.38873143 |
| O  | -5.79240862 | 5.57126276  | -7.28371167 |
| Zn | -5.55345179 | 5.08594018  | -5.47688950 |
| O  | -3.77452213 | 2.87326354  | -8.04849990 |
| O  | -3.83622739 | 6.13304075  | -9.19241547 |
| O  | 6.62722529  | 3.72871269  | 7.16100778  |
| O  | 6.70968180  | 0.52985125  | 6.30003233  |
| Zn | 7.56436352  | 2.06716021  | 7.04846837  |
| O  | 9.37599462  | 5.31390401  | 6.12395694  |
| Zn | 10.24886138 | 1.10016200  | 5.78049301  |
| O  | 11.39388029 | 2.61590419  | 5.35916777  |
| O  | 9.51882270  | -0.19240469 | 4.64273475  |
| O  | 9.43769887  | 2.05412628  | 7.26787128  |
| Zn | 10.18316078 | 3.66136426  | 6.46418758  |

**MC-32**

|    |             |             |            |
|----|-------------|-------------|------------|
| O  | 9.08127203  | -3.28750490 | 3.00190051 |
| Zn | 10.72937105 | -2.42667515 | 3.80981115 |
| Zn | 9.57192614  | -4.96693389 | 4.02653812 |
| O  | 11.26855171 | -4.13424563 | 4.76076880 |
| O  | 8.48810092  | -4.40722555 | 5.64647344 |
| Zn | 8.07449443  | -2.68688283 | 4.65593134 |
| Zn | 10.16220405 | -3.49464673 | 6.33550680 |
| O  | 9.70043139  | -1.74649995 | 5.41918490 |
| O  | 10.13216556 | -2.50385574 | 0.19095380 |
| Zn | 5.92995896  | -2.55269659 | 2.70603467 |
| O  | 7.95222247  | -5.07987265 | 0.73706689 |

|    |             |             |            |
|----|-------------|-------------|------------|
| Zn | 12.65917478 | -5.68521853 | 1.84317281 |
| O  | 11.99051892 | -1.30961379 | 2.77659929 |
| Zn | 7.01874512  | 0.00976250  | 4.88007460 |
| O  | 12.87462238 | -6.47599505 | 3.51501225 |
| Zn | 5.63122642  | -2.96046726 | 6.20245617 |
| Zn | 13.15581819 | -4.98810351 | 4.82168151 |
| O  | 6.95165892  | -1.85137541 | 1.26794604 |
| Zn | 7.21142904  | -3.26559520 | 8.79949243 |
| O  | 13.12857799 | -3.91818816 | 1.14636005 |
| O  | 9.54940272  | 0.47208997  | 1.51117659 |
| Zn | 5.33177267  | -5.35319695 | 4.24149877 |
| O  | 10.77107395 | -3.61234418 | 8.21241296 |
| Zn | 9.46993788  | -6.05164355 | 1.33255683 |
| O  | 10.44062996 | -6.87455563 | 8.22677629 |
| Zn | 12.60689878 | -0.65684769 | 7.21176580 |
| O  | 5.44347987  | -4.84091391 | 6.02816032 |
| Zn | 7.74433455  | -7.21921457 | 4.18944052 |
| O  | 7.72766751  | -7.38214489 | 6.08030006 |
| Zn | 11.36900887 | -3.89120642 | 0.30824672 |
| O  | 13.22575540 | -5.46744825 | 6.76215115 |
| Zn | 12.71958654 | -3.87378277 | 7.65961045 |
| Zn | 12.14081855 | 0.06746398  | 4.27782841 |
| O  | 7.45124643  | 0.89780816  | 3.28980076 |
| Zn | 11.97371069 | -6.82050830 | 7.02267292 |
| O  | 10.90706877 | -0.23730615 | 7.84605412 |
| Zn | 7.16476730  | -5.57716427 | 6.73137285 |
| O  | 5.93250252  | -2.12768409 | 7.85193846 |
| Zn | 8.44262918  | -3.16364307 | 1.03388639 |
| O  | 13.66867132 | -2.27063519 | 7.47127213 |
| Zn | 9.43807352  | -7.67940937 | 6.75330635 |
| O  | 5.14456868  | -4.25102254 | 2.64430214 |
| Zn | 13.35860283 | -2.81887114 | 2.64467612 |
| O  | 10.63024133 | 1.12711076  | 4.72114126 |
| Zn | 9.77483914  | 0.15313685  | 6.24438937 |
| O  | 7.81943436  | 0.44604663  | 6.54478239 |
| Zn | 14.13687526 | -2.14610109 | 5.57570324 |
| O  | 6.27514392  | -1.87144998 | 4.59915721 |
| Zn | 11.27500867 | -7.31758426 | 4.09439823 |
| O  | 8.30372042  | -1.71490428 | 9.24871177 |
| Zn | 10.07852371 | -1.74147882 | 8.65364673 |
| O  | 11.17205578 | -5.81722636 | 0.58924692 |
| Zn | 10.64484972 | -1.02651455 | 1.26528877 |
| O  | 9.49935723  | -6.77901552 | 3.24140249 |
| Zn | 9.39103203  | 1.15167853  | 3.33147592 |
| Zn | 7.73155191  | -0.22145341 | 1.71873430 |
| O  | 13.50249641 | -0.30446161 | 5.50805601 |
| O  | 7.71075238  | -5.04624293 | 8.58035559 |



|    |             |             |            |
|----|-------------|-------------|------------|
| Zn | 9.59874580  | -5.24126256 | 8.58584903 |
| O  | 6.22075774  | -6.75451686 | 3.20575849 |
| Zn | 7.29676546  | -0.73594716 | 7.88546547 |
| O  | 11.09440527 | -8.06795828 | 5.79995927 |
| Zn | 6.46288044  | -5.42509564 | 1.80047559 |
| O  | 14.23568639 | -3.41703875 | 4.21817901 |

**MC-60**

|    |             |             |             |
|----|-------------|-------------|-------------|
| O  | 1.82351723  | 1.72600310  | -0.91758205 |
| Zn | 4.76020639  | 3.93084715  | -3.31199557 |
| O  | 3.74332134  | 7.75629505  | -1.28498297 |
| Zn | -0.09318556 | 4.96544917  | -1.92112661 |
| O  | 1.87761947  | 7.14169883  | 0.76054248  |
| Zn | 3.83588153  | 7.09051121  | 0.65113711  |
| O  | 0.86903532  | 6.62955152  | -2.63097377 |
| O  | 5.84054693  | 4.96272207  | -2.04152396 |
| Zn | 1.78604725  | 7.61011696  | -1.23346034 |
| Zn | 3.79660740  | 3.90152288  | 1.76439390  |
| O  | -0.14940960 | 4.32476841  | -0.09328266 |
| Zn | 1.89198981  | 5.50057241  | -3.86921294 |
| O  | 4.94050647  | 2.85177049  | 0.42614638  |
| Zn | 4.76175024  | 6.64457987  | -2.50213176 |
| O  | 1.86273191  | 3.96226809  | 1.87208479  |
| Zn | 0.96028137  | 2.79936124  | 0.44543167  |
| O  | 0.78350621  | 3.87412596  | -3.29642191 |
| Zn | 3.86923239  | 1.82772733  | -0.82333139 |
| O  | 3.82357524  | 5.65184061  | -3.91264169 |
| Zn | 1.88435182  | 2.36954415  | -2.77062872 |
| O  | 4.78320045  | 5.53851617  | 1.32141141  |
| Zn | 0.89494666  | 5.52947638  | 1.19563095  |
| O  | 3.93107645  | 2.27849900  | -2.73146507 |
| Zn | 5.78227460  | 4.52663434  | -0.15466977 |
| O  | 3.75666083  | 11.00062077 | 1.76988439  |
| Zn | 1.05006749  | 10.39953332 | -1.40645771 |
| Zn | 5.55603673  | 8.95853213  | -0.89029332 |
| O  | 0.02933467  | 8.80691802  | -0.84064986 |
| Zn | 1.85105488  | 7.98056767  | 3.31009212  |
| O  | 5.55789061  | 8.35144880  | 0.97782848  |
| Zn | 3.73390128  | 9.80450670  | -2.98330006 |
| O  | 0.76926789  | 9.39262823  | 2.51536620  |
| O  | 3.76326489  | 8.06031773  | 3.46037784  |
| Zn | 3.72039544  | 11.24895583 | -0.16209645 |
| O  | 4.78979681  | 10.61452935 | -1.55891168 |
| Zn | 4.50617428  | 9.37516735  | 2.29858707  |
| O  | 1.81865797  | 9.90603664  | -3.07946064 |
| Zn | 1.81143508  | 10.69904886 | 1.67594513  |

|    |             |             |             |
|----|-------------|-------------|-------------|
| O  | 1.76837505  | 11.51373272 | -0.09306671 |
| Zn | 0.04070803  | 8.32543537  | 1.06331624  |
| Zn | 1.90394791  | 0.02864231  | 0.48812935  |
| O  | 3.90840758  | -2.07752938 | -1.96959781 |
| Zn | 4.85883557  | -0.89421607 | -0.88323047 |
| O  | 6.31303357  | 0.23854132  | -1.36524154 |
| Zn | 0.96939555  | 0.00302598  | -4.16739501 |
| O  | 5.01300055  | 0.02664713  | -4.50603710 |
| Zn | 1.97971605  | -1.81127840 | -1.90732564 |
| O  | -0.51068390 | 0.67301560  | -3.17035794 |
| O  | 1.95088707  | -1.55450173 | -3.86185595 |
| Zn | 6.17341246  | 0.85425055  | -3.17820594 |
| O  | 1.92127884  | 1.61343415  | -4.79540358 |
| Zn | -0.36811556 | 0.23625777  | -1.30668082 |
| O  | 3.86656284  | 0.11677508  | 0.49269852  |
| Zn | 3.88543443  | 1.57878835  | -4.81785333 |
| Zn | 3.87261871  | -1.25409477 | -3.75987846 |
| O  | 0.81142214  | -1.14779010 | -0.60673086 |
| O  | -1.95599457 | 4.66097668  | 3.97059705  |
| Zn | -2.31960238 | 2.81761436  | -0.56179136 |
| O  | -1.90740870 | 1.99240853  | 3.21899022  |
| Zn | -0.76073669 | 3.13008726  | 4.30694541  |
| O  | -3.09551581 | 4.07687245  | 0.70609026  |
| O  | 0.92740929  | 6.45022379  | 4.01329827  |
| Zn | -2.68808135 | 3.64411359  | 2.47899456  |
| Zn | 1.89181253  | 2.20217138  | 3.19964693  |
| O  | -1.47238967 | 1.17397151  | -0.04494030 |
| Zn | -1.92864338 | 5.57111088  | 0.27783762  |
| Zn | -0.85095962 | 6.06958263  | 3.44403538  |
| O  | 0.96262354  | 1.14346232  | 1.83121216  |
| O  | -0.91026497 | 6.65694176  | 1.55937175  |
| O  | 1.06663260  | 3.11402466  | 4.70407242  |
| Zn | -1.01189125 | 1.16871986  | 1.80370881  |
| Zn | 1.90738013  | 4.84538192  | 4.40098117  |
| O  | 1.84628670  | 4.77818956  | -5.90607861 |
| Zn | 0.86227305  | 8.73450431  | -4.26494950 |
| O  | -1.87174737 | 6.15227730  | -1.61811773 |
| Zn | -1.76754207 | 4.63023073  | -5.82415031 |
| O  | -2.45704092 | 3.24363998  | -2.42926172 |
| O  | -2.96991478 | 5.71127720  | -4.69871422 |
| Zn | -2.79177081 | 5.04097666  | -2.96607207 |
| O  | -1.07664200 | 2.91747891  | -5.53047299 |
| Zn | -1.80658443 | 7.22957400  | -5.07113916 |
| Zn | -0.96684245 | 7.78763117  | -2.22005715 |
| Zn | 0.82673084  | 6.39472666  | -6.40306936 |
| O  | -1.02437380 | 6.25776704  | -6.59645405 |
| Zn | 0.84500075  | 3.16993142  | -5.38792310 |

|    |             |            |             |
|----|-------------|------------|-------------|
| O  | -1.06104635 | 8.56704777 | -3.99790118 |
| Zn | -1.35700703 | 2.31410114 | -3.69921438 |
| O  | 1.82635341  | 7.83892738 | -5.66324615 |
| O  | 7.63024980  | 4.78199697 | -6.06856028 |
| Zn | 6.48241154  | 8.32850852 | -4.09753046 |
| Zn | 3.82682236  | 4.85477962 | -5.97301847 |
| O  | 6.54312714  | 7.83079882 | -2.18823862 |
| Zn | 7.59096904  | 6.25058356 | -1.67513825 |
| O  | 4.79243426  | 3.25780062 | -5.36142982 |
| Zn | 3.74217164  | 7.72643994 | -5.57589768 |
| O  | 8.78931285  | 5.24108756 | -2.82555383 |
| O  | 7.24695521  | 2.34248291 | -3.74168069 |
| Zn | 6.45009366  | 6.29749193 | -6.39523472 |
| O  | 4.62123213  | 6.44714070 | -6.75451458 |
| Zn | 6.76556111  | 3.31292791 | -5.30874842 |
| O  | 4.68704388  | 8.90043379 | -4.38530629 |
| Zn | 8.37796793  | 5.80564455 | -4.56066988 |
| O  | 7.61242426  | 7.44249515 | -5.28923404 |
| Zn | 8.05718488  | 3.48136602 | -2.42522670 |
| O  | 8.19020372  | 2.85579001 | -0.61479796 |
| Zn | 6.58313690  | 6.77544368 | 1.61074625  |
| O  | 3.82030726  | 4.93625257 | 4.54661641  |
| O  | 3.87342183  | 2.21622378 | 3.11232575  |
| Zn | 4.85546473  | 3.34319104 | 4.40225231  |
| O  | 6.67553166  | 6.49509239 | 3.53208893  |
| Zn | 7.48475239  | 2.20562286 | 2.99777236  |
| O  | 8.65542934  | 3.74712177 | 2.62406242  |
| Zn | 4.75325909  | 6.46106926 | 3.84593950  |
| O  | 6.83453292  | 0.89828063 | 1.82971060  |
| Zn | 7.12070988  | 1.36938753 | -0.03909889 |
| Zn | 8.48270220  | 4.09916437 | 0.79966820  |
| O  | 6.70968942  | 3.15947753 | 4.50884043  |
| Zn | 4.90722261  | 1.14894100 | 1.82835516  |
| O  | 7.52868364  | 5.73375089 | 0.23907666  |
| Zn | 7.46023643  | 4.80999267 | 3.73583813  |

**MC-78**

|    |             |             |            |
|----|-------------|-------------|------------|
| Zn | -1.48356486 | -4.76073360 | 3.40793812 |
| Zn | -3.14165260 | -4.62699147 | 0.90472978 |
| Zn | -4.69444824 | -4.79060985 | 3.52039723 |
| O  | -3.15127198 | -5.42609480 | 2.68410015 |
| O  | -6.93582724 | -1.83093192 | 0.54130913 |
| O  | -4.75939756 | -3.90607254 | 0.01498019 |
| O  | -6.43106297 | -4.19283053 | 2.88783431 |
| Zn | -6.34630271 | -3.54603402 | 1.13771974 |
| O  | -1.46863978 | -3.46170748 | 4.84462368 |

O -3.13390688 -0.75911693 4.61252324  
O -4.82389352 -3.56973965 5.06132840  
Zn -3.18966832 -2.67183002 5.11636807  
Zn -6.76148467 -0.46958716 1.89060064  
Zn -4.82150265 0.05689564 3.95742890  
Zn -6.22671272 -2.63573052 4.08463708  
O -6.55172998 -0.81718972 3.81034466  
Zn -1.46825841 0.33568780 4.87889378  
O -1.51159884 2.21900662 4.35520370  
O -1.51544492 -2.45247865 -5.41161253  
O -3.17505909 -3.59230633 -2.94808177  
O -4.87195315 -2.56474726 -5.59990459  
Zn -3.23836906 -3.07284472 -4.85555404  
Zn -6.77006155 -1.35818338 -1.32119056  
Zn -4.85648588 -3.42522965 -1.90789040  
Zn -6.26788496 -2.17457854 -4.29753897  
O -6.58527679 -2.84792784 -2.58438077  
Zn -1.51460294 -0.55881245 -5.81712175  
Zn -3.15225239 1.55213686 -4.44310906  
Zn -4.72889884 -0.62154571 -5.88902950  
O -3.17854495 0.40995484 -6.02401714  
O -6.93357748 0.49260023 -1.82330406  
O -4.76244567 1.97431123 -3.36754819  
O -6.46035550 -0.35837101 -5.04649549  
Zn -6.35706211 0.83314088 -3.61179120  
O 0.09599399 -5.36660486 2.51068051  
O -1.54910133 -4.86965354 -0.24510006  
Zn 0.02415173 -5.61684270 0.61778804  
Zn -0.06475108 -3.33875039 -4.55800262  
Zn -1.51255813 -4.38116976 -2.13771304  
O -0.12342459 -4.84996022 -3.38975765  
O -1.46681938 5.91958027 0.58528911  
O -3.15137062 4.37147810 -1.62480329  
O -4.82218711 6.16378097 0.60073956  
Zn -3.19523332 5.76295444 -0.21909282  
Zn -6.76472044 1.86819951 -0.48203560  
Zn -4.84181721 3.39862378 -1.98955728  
Zn -6.22847243 4.85215606 0.29108234  
O -6.56510232 3.70461999 -1.14398768  
Zn -1.46309767 5.32154930 2.42731552  
Zn -3.11147670 3.09210259 3.58397302  
Zn -4.67543016 5.43584746 2.42632227  
O -3.12329644 5.03151619 3.38133235  
O -6.94570592 1.37754797 1.37040330  
O -4.73056444 1.96183858 3.40887037  
O -6.41239345 4.58770251 2.23877650  
Zn -6.32957254 2.74684260 2.54714708

O -1.55078458 2.66030761 -4.08793580  
O 0.07023594 0.51233226 -5.90074512  
Zn 0.01437854 2.27947530 -5.17429260  
Zn -1.49550797 4.05720213 -2.72073598  
O -2.46421872 -2.64068440 1.36334528  
Zn -4.13796311 -1.88601875 0.47437501  
Zn -2.49945456 -1.19231419 2.65317031  
O -4.27520556 -0.52403273 1.88779458  
O -0.81670677 -0.23021769 2.84907810  
Zn -0.83027272 1.65553343 2.30386290  
Zn -2.52748921 -1.68152328 -2.34422181  
O -4.29606492 -1.34262185 -1.37673552  
O -2.47942844 0.16029731 -2.95230184  
Zn -4.14761083 0.56302210 -1.84748726  
Zn -0.85469490 -2.81802653 0.28851828  
O -0.84676955 -2.34418513 -1.61664637  
Zn -2.50438443 2.89055216 -0.27525935  
O -4.28267664 1.89585914 -0.44965136  
O -2.44362121 2.49930678 1.62529893  
Zn -4.11247112 1.34939296 1.43287857  
Zn -0.85978195 1.16801853 -2.58059749  
O -0.82943691 2.58331268 -1.22024040  
Zn 1.49550383 -4.05720014 2.72072838  
O 1.55077470 -2.66030528 4.08793018  
O -0.07025761 -0.51233127 5.90073630  
Zn -0.01439858 -2.27947117 5.17428110  
O 4.76242837 -1.97426200 3.36751232  
O 6.93378456 -0.49260227 1.82329604  
O 6.46032439 0.35837432 5.04646269  
Zn 6.35708429 -0.83311238 3.61172675  
Zn 4.85647736 3.42522806 1.90789071  
Zn 6.77006794 1.35815904 1.32119676  
Zn 6.26786242 2.17458774 4.29752451  
O 6.58526694 2.84791794 2.58436202  
Zn 3.15224462 -1.55212325 4.44311438  
Zn 1.51457831 0.55881831 5.81710681  
Zn 4.72888183 0.62154663 5.88900638  
O 3.17852574 -0.40994218 6.02401955  
O 3.17505101 3.59232036 2.94808248  
O 1.51542470 2.45248209 5.41160636  
O 4.87194211 2.56475818 5.59989881  
Zn 3.23835168 3.07284759 4.85555598  
O 1.51157613 -2.21900543 -4.35521112  
Zn 1.46823092 -0.33568949 -4.87888935  
O 3.15136335 -4.37146997 1.62479666  
O 1.46680666 -5.91957709 -0.58528864  
O 4.82217616 -6.16378649 -0.60073843

Zn 3.19522334 -5.76295225 0.21909549  
Zn 3.11145289 -3.09211322 -3.58398367  
Zn 1.46307793 -5.32155276 -2.42731619  
Zn 4.67541141 -5.43587066 -2.42632793  
O 3.12327554 -5.03152759 -3.38133377  
Zn 4.84180276 -3.39859334 1.98952743  
Zn 6.76475902 -1.86818194 0.48204386  
Zn 6.22846049 -4.85215456 -0.29109748  
O 6.56508989 -3.70460676 1.14396415  
O 4.73054505 -1.96185894 -3.40891177  
O 6.94559326 -1.37756258 -1.37041747  
O 6.41238363 -4.58773128 -2.23879551  
Zn 6.32954316 -2.74687826 -2.54718832  
O 1.54908445 4.86965389 0.24509160  
O -0.09600677 5.36661083 -2.51068344  
Zn -0.02416638 5.61684065 -0.61779101  
Zn 1.51253695 4.38118399 2.13770593  
Zn 0.06472675 3.33875183 4.55799726  
O 0.12340710 4.84996540 3.38975643  
Zn 6.76140257 0.46957754 -1.89062619  
Zn 4.82146699 -0.05691008 -3.95746200  
Zn 6.22668598 2.63571085 -4.08465259  
O 6.55169172 0.81717551 -3.81036817  
O 1.46861511 3.46171515 -4.84463967  
O 3.13387051 0.75911748 -4.61252631  
O 4.82386417 3.56972392 -5.06134927  
Zn 3.18963621 2.67182437 -5.11637294  
O 6.93569494 1.83091817 -0.54132175  
O 4.75938878 3.90608671 -0.01497319  
O 6.43105136 4.19282236 -2.88786245  
Zn 6.34625771 3.54605309 -1.13774512  
Zn 1.48354874 4.76073895 -3.40794623  
Zn 3.14163567 4.62697911 -0.90472769  
Zn 4.69442179 4.79059728 -3.52041419  
O 3.15125984 5.42608011 -2.68409920  
O 0.82942486 -2.58330899 1.22023169  
Zn 0.85974968 -1.16802692 2.58059814  
Zn 4.14747898 -0.56302668 1.84749133  
O 4.29604734 1.34260323 1.37675076  
O 2.47936915 -0.16026879 2.95233295  
Zn 2.52747291 1.68154798 2.34422379  
Zn 0.83026789 -1.65553143 -2.30386239  
O 0.81668358 0.23021729 -2.84907668  
Zn 2.50436327 -2.89055291 0.27523512  
O 2.44362212 -2.49930482 -1.62531638  
O 4.28264035 -1.89584375 0.44966071  
Zn 4.11251190 -1.34941491 -1.43288776

Zn 0.85468773 2.81801854 -0.28852705  
O 0.84675529 2.34419422 1.61664483  
O 4.27519506 0.52401631 -1.88780995  
Zn 2.49943983 1.19229870 -2.65315365  
Zn 4.13800404 1.88599471 -0.47437336  
O 2.46422999 2.64066237 -1.36332416

**MC-100**

Zn -4.65362234 -2.38561178 4.46380801  
Zn -6.51153214 -2.62570369 2.28060481  
Zn -7.35026523 -0.92756676 4.79837806  
O -6.57255032 -2.52274107 4.23666399  
O -7.45039280 1.33524738 0.97671401  
O -7.82697470 -1.72304376 1.18816481  
O -8.57854633 0.28890618 3.85273011  
Zn -8.33175672 -0.09027505 2.03824683  
O -3.75812813 -0.70765496 5.03314910  
O -6.67328809 0.56457744 5.85650652  
Zn -4.83076004 0.80921828 5.73266904  
Zn -6.50887685 2.80917582 1.87712719  
Zn -7.47568913 1.75148868 4.50222780  
O -6.70004487 3.27909009 3.75146449  
O -4.78131400 -3.79323338 -4.26350953  
O -6.41471929 -2.98088570 -1.69509978  
O -7.73195513 -2.10927674 -4.54848344  
Zn -6.48554137 -3.17801935 -3.65856562  
Zn -7.55948552 1.09472003 -0.98093070  
Zn -7.55917041 -1.70088438 -0.71852098  
Zn -8.37875132 -0.61123326 -3.47335806  
O -8.65883220 -0.36496741 -1.64925039  
Zn -3.85225050 -2.49418404 -5.36906892  
Zn -3.93262368 0.53321320 -5.05292913  
Zn -6.61641295 -0.81482113 -5.51508102  
O -4.81479843 -0.93804454 -5.99377333  
O -6.51457358 2.30157263 -2.12263594  
O -4.78068381 2.25365893 -4.65666881  
O -7.70599322 0.65277573 -4.81875297  
Zn -6.57124075 1.91787939 -4.05176671  
O -3.75762397 -4.06223558 4.16746601  
O -5.35810463 -3.94320093 1.35921449  
Zn -4.24390752 -4.98752776 2.56939973  
Zn -3.86359390 -4.97744022 -3.08339711  
Zn -5.32837306 -4.23416819 -0.57528059  
O -4.56837535 -5.74831769 -1.48060905  
O -2.02863079 3.73016908 -3.94611369  
Zn -5.46013686 3.77907228 -1.27262553

Zn -3.97154637 3.78351212 -3.87364581  
O -4.72118304 4.97913582 -2.58182064  
O -5.48346737 3.97866010 0.67110697  
O -1.94420693 0.47254494 -5.09679269  
O -1.97998148 -2.62285202 -5.71537729  
Zn -0.94984513 -1.01690543 -5.87803066  
Zn -1.08047984 2.14182475 -4.56079609  
O -4.74211154 -1.26515589 2.17763811  
Zn -5.63790711 0.13774502 1.08295114  
Zn -3.69544778 0.16848468 3.11756086  
O -4.69136261 1.56321046 2.14602589  
Zn -4.77307864 -1.66224150 -1.82248734  
O -5.77143057 -0.24445354 -0.80008328  
O -3.93398960 -0.34424717 -3.03800492  
Zn -4.76289674 1.07879241 -1.94200761  
Zn -3.68165746 -2.51947515 1.13510716  
O -3.61974169 -2.82674841 -0.79377868  
Zn -2.00691924 2.82546659 -1.87198393  
O -3.71752009 2.44002610 -1.05916050  
Zn -3.68687887 2.65109960 0.88646708  
Zn -1.95126306 -0.34740172 -3.04136966  
O -1.02146349 1.26323627 -2.43632089  
Zn -1.86852085 -3.74813184 4.00361439  
O -0.86513522 -2.23389726 4.70260727  
O -1.92423861 -4.88475688 -3.19464652  
Zn -1.02299034 -3.58119805 -4.34576396  
O -0.86584427 -5.32527247 3.23457184  
O -3.39272954 -6.41378708 1.65466549  
O -0.81697417 -8.46368697 2.01266656  
Zn -1.75623062 -6.92927460 2.50850567  
Zn -0.96456843 -6.16743541 -2.02955133  
Zn -3.34462100 -6.58772898 -0.27260562  
Zn -0.79845655 -8.44926335 0.03843905  
O -1.95050448 -7.60598149 -1.15839588  
Zn 1.14508195 -5.35607845 3.23383105  
Zn 3.54024704 -6.17673442 1.66923068  
Zn 1.09366110 -8.14117338 1.93386515  
O 2.20091337 -6.94912750 2.84126895  
O 1.05358938 -6.08494709 -2.06754882  
O 3.62871374 -6.54960704 -0.23019947  
O 1.12443486 -8.69870868 0.04113062  
Zn 2.00965930 -7.34258436 -0.88842451  
Zn 4.45115216 -5.40636606 -1.49868799  
Zn 2.04666704 -4.76337003 -3.22948328  
Zn 4.82568105 -3.55493841 -4.17602392  
O 3.95467603 -5.03055832 -3.30461410  
O 0.92888000 -0.88495345 -6.16458856



O 0.96809034 -3.55270038 -4.33462363  
O 3.86536496 -2.43674307 -5.44117254  
Zn 1.96631105 -2.35994340 -5.50187938  
Zn 1.76330900 0.58926456 -5.23422733  
O -1.93823957 -2.81353390 1.96697440  
Zn -0.88778775 -1.31178214 2.56711775  
Zn -1.92292525 -3.34679098 -1.56590838  
O -1.03086261 -2.03684267 -2.71870136  
Zn -0.88047599 -4.34755553 1.39820510  
O -1.02522589 -4.69671589 -0.50005904  
O 1.16168479 -4.46830423 1.30530596  
Zn 0.99725420 -4.59598499 -0.61679215  
O 1.98864674 -3.25447997 -1.61182245  
Zn 0.92706457 -2.02954550 -2.70975102  
O 1.75190314 -0.32722312 -3.15718835  
Zn -1.76318253 -0.58920078 5.23454819  
O -0.92889033 0.88523071 6.16467006  
O -0.96812295 3.55308405 4.33498023  
O -3.86547096 2.43702902 5.44124335  
Zn -1.96639691 2.36020541 5.50210720  
Zn -4.45113319 5.40627119 1.49858651  
Zn -2.04672789 4.76368831 3.22974572  
Zn -4.82587645 3.55516641 4.17611968  
O -3.95481074 5.03069473 3.30459148  
Zn 1.02300375 3.58156189 4.34591310  
O 1.92419186 4.88500927 3.19460797  
O 3.39248699 6.41400207 -1.65480233  
O 0.86560646 5.32544751 -3.23459092  
O 0.81670961 8.46394609 -2.01284466  
Zn 1.75601791 6.92953580 -2.50863106  
Zn -3.53984840 6.17617210 -1.66941705  
Zn -1.14525685 5.35620588 -3.23408147  
Zn -1.09391029 8.14131221 -1.93405731  
O -2.20102634 6.94924249 -2.84160873  
Zn 3.34446734 6.58786475 0.27249507  
Zn 0.96443314 6.16761752 2.02948197  
Zn 0.79821410 8.44942642 -0.03861730  
O 1.95030055 7.60613625 1.15818964  
O -3.62863799 6.54930729 0.22997120  
O -1.05369842 6.08515791 2.06763237  
O -1.12469129 8.69877866 -0.04129777  
Zn -2.00976902 7.34259069 0.88830550  
O 0.86513145 2.23403421 -4.70284672  
Zn 1.86821070 3.74830155 -4.00361666  
O -1.75182452 0.32741887 3.15746501  
Zn -0.92711928 2.02982489 2.71018273  
O -1.98869662 3.25475971 1.61234580

O 1.03069017 2.03721365 2.71884455  
Zn 1.92289093 3.34705273 1.56602004  
Zn 0.88016764 4.34792088 -1.39819287  
O -1.16205959 4.46871031 -1.30519523  
O 1.02500264 4.69680854 0.50008815  
Zn -0.99747287 4.59606334 0.61691373  
Zn 0.88754606 1.31182791 -2.56695492  
O 1.93785571 2.81378511 -1.96706200  
Zn 1.08057310 -2.14184905 4.56075286  
O 1.94387323 -0.47237087 5.09670966  
O 1.98004716 2.62313377 5.71543912  
Zn 0.94984403 1.01720551 5.87800000  
O 4.78031841 -2.25166654 4.65130140  
O 6.51638436 -2.30292143 2.12234639  
O 7.70672087 -0.65283815 4.81926511  
Zn 6.57316718 -1.91808729 4.05106846  
Zn 7.55936521 1.70068077 0.71872883  
Zn 7.56000454 -1.09501764 0.98078543  
Zn 8.37903181 0.61132175 3.47339942  
O 8.65917499 0.36484303 1.64934685  
Zn 3.93233335 -0.53203112 5.05182059  
Zn 3.85236145 2.49471821 5.36912123  
Zn 6.61647061 0.81457799 5.51502627  
O 4.81486700 0.93832443 5.99363256  
O 6.41445853 2.98057139 1.69486938  
O 4.78144191 3.79396197 4.26389302  
O 7.73163484 2.10915248 4.54818152  
Zn 6.48510432 3.17790910 3.65828516  
O 2.02863232 -3.73034369 3.94640871  
Zn 3.97127682 -3.78385723 3.87210963  
Zn 5.46119088 -3.77977526 1.27254071  
O 4.72198216 -4.98005647 2.58153033  
O 5.48362079 -3.97891518 -0.67121218  
O 5.35758197 3.94323227 -1.35926739  
O 3.75732282 4.06253669 -4.16763507  
Zn 4.24370946 4.98772450 -2.56948196  
Zn 5.32804329 4.23398027 0.57527818  
Zn 3.86358258 4.97773801 3.08346224  
O 4.56817206 5.74833387 1.48045062  
Zn 6.50881462 -2.80914593 -1.87721434  
Zn 7.47551379 -1.75119164 -4.50230915  
O 6.69990191 -3.27882828 -3.75162240  
O 3.75820311 0.70802592 -5.03315187  
O 6.67311241 -0.56426703 -5.85666758  
Zn 4.83061981 -0.80898294 -5.73250601  
O 7.45040763 -1.33528499 -0.97681731  
O 7.82682712 1.72319894 -1.18794339

O 8.57828575 -0.28857497 -3.85277534  
Zn 8.33128027 0.09048419 -2.03829124  
Zn 4.65333559 2.38611797 -4.46442170  
Zn 6.51085354 2.62521388 -2.28026764  
Zn 7.35000396 0.92783081 -4.79839210  
O 6.57208146 2.52283471 -4.23645419  
O 1.02125988 -1.26315335 2.43606297  
Zn 1.95072015 0.34759961 3.04105293  
Zn 4.76355830 -1.08022863 1.94491313  
O 5.77161219 0.24303477 0.80137583  
O 3.93334484 0.34475254 3.03792427  
Zn 4.77287264 1.66151085 1.82168329  
Zn 2.00683673 -2.82512548 1.87164192  
O 3.71819937 -2.44056500 1.06005447  
Zn 3.68699437 -2.65123925 -0.88563193  
Zn 3.68118382 2.51971119 -1.13519139  
O 3.61955026 2.82673505 0.79378476  
O 4.69108834 -1.56349152 -2.14563623  
Zn 3.69556267 -0.16823114 -3.11694429  
Zn 5.63723603 -0.13846472 -1.08166584  
O 4.74215576 1.26474777 -2.17636415

**MC-132**

Zn 0.22491647 -7.07425217 3.45339934  
O -0.43822369 -0.40066943 -7.24828746  
O -2.03721976 -3.15969859 -7.62647082  
O -0.34006557 -5.14164759 -5.89413724  
O -3.27128523 -6.20576921 -7.16712419  
Zn -0.35776703 -2.31246028 -7.73812218  
Zn -1.83031267 -5.01689994 -7.15791572  
Zn -1.31904889 -7.30237125 0.35678650  
Zn -2.42765060 -7.60471259 -2.53050201  
Zn -0.55488793 -6.47597389 -4.45204843  
Zn -3.29144185 -7.30249614 -5.56511304  
O -1.06210662 -8.20493675 -1.34031177  
O -1.93275494 -7.83752441 -4.40350833  
Zn -2.07900742 0.52176949 -6.79495049  
Zn -5.11867988 0.32963689 -5.26834066  
Zn -3.49917785 -2.49344177 -6.55246936  
Zn -5.56197469 -0.46458955 -2.25710852  
Zn -5.43079460 -2.90126325 -4.48237477  
Zn -4.82836733 -5.25311230 -6.42864042  
O -3.49987809 -0.55481968 -6.03287871  
O -5.74435116 -1.04304663 -4.09815957  
O -5.20275014 -3.42465372 -6.33409377  
O -3.01925368 -6.74873632 1.06777164

O -5.87690642 -5.02297665 0.24568486  
O -4.08352177 -6.81005646 -1.97498770  
O -5.72003541 -1.74682369 -0.79421679  
O -5.31890802 -4.20324352 -3.01368856  
O -5.14117094 -6.72519284 -5.18475523  
Zn -4.28108438 -6.05039643 -0.20049724  
Zn -5.62843830 -3.66625383 -1.11985958  
Zn -5.12982413 -6.14346627 -3.41578477  
O -2.96888259 4.61384562 5.08422715  
O -5.87442256 3.35326118 3.75910779  
O -4.45009966 2.17354131 6.57626790  
O -5.80468753 0.80906203 1.44193052  
O -5.73976530 0.08039469 4.70076598  
O -5.90683311 -0.54580702 7.96006725  
Zn -4.38941486 3.32358551 5.01874872  
Zn -5.77748102 1.47496681 3.27462647  
Zn -5.63938917 0.69314459 6.59460679  
Zn -2.96468623 -5.87027102 2.72164591  
Zn -5.78581793 -4.12862203 1.88939090  
Zn -4.39197226 -4.00549928 5.09811255  
Zn -5.82784429 -1.10597052 1.06309703  
Zn -6.04921951 -1.81543963 4.27864081  
Zn -5.74561364 -2.38118316 7.32110569  
O -4.29387404 -4.52737877 3.15817668  
O -6.28553308 -2.37551142 2.45533137  
O -6.06970528 -3.17334518 5.65977968  
Zn -1.38686536 4.09043613 6.04693888  
Zn -2.88803789 1.89743723 7.65764315  
Zn -1.27085928 -0.53669318 7.75273514  
Zn -4.13648694 -0.78966727 8.80051998  
O -1.37675164 3.05988333 7.69029078  
O -2.64767735 0.33530008 8.80079439  
O -1.41402301 -5.98378402 3.87659284  
O -3.10060358 -4.76710038 6.32094094  
O -1.22221669 -2.46965557 7.32976499  
O -4.31428026 -2.71516406 8.63448081  
Zn -1.43323151 -5.46126585 5.78159897  
Zn -2.86859745 -3.46113582 7.71586325  
Zn -0.48889377 3.31114469 -6.64131290  
Zn -1.80205515 5.95217582 -5.64446420  
Zn -2.92938075 8.41062465 -3.98505752  
O -0.27966733 5.23702954 -6.54626010  
O -1.43391144 7.68901689 -4.83728906  
O -5.53804025 1.46516830 -1.88553129  
O -5.25283670 2.19758868 -5.24526285  
O -5.05566084 4.62138623 -2.85249922  
O -2.17738271 2.39236309 -6.75343176

O -3.49150536 5.05447632 -5.48864781  
O -4.79058739 7.75442535 -3.92722342  
Zn -5.25165033 2.70222854 -3.36823799  
Zn -3.61872447 3.13807319 -5.72824022  
Zn -4.69245311 5.93220885 -4.30605809  
O -0.26873606 7.66609906 -1.56677725  
O -0.99096647 6.47234573 3.16371734  
O -2.30949702 8.14702989 0.76463881  
O -3.16132544 9.24738745 -2.24940044  
Zn -0.74284683 7.84880888 1.76780652  
Zn -1.86595124 8.66840394 -1.03445362  
Zn -5.64812751 2.09435725 -0.03927706  
Zn -5.55022288 4.30781827 2.17957917  
Zn -5.45391025 5.23735979 -1.02661976  
Zn -2.67943378 5.59017028 3.51211945  
Zn -3.73983988 6.85409355 0.60437910  
Zn -4.74864957 8.10463628 -2.00866870  
O -5.93669670 3.97449452 0.33971783  
O -3.91047698 5.43845142 2.02149662  
O -5.31017896 7.10454860 -0.53322890  
Zn -1.09596137 -3.66079433 -4.58530591  
O -0.43011621 -5.38991223 -0.13584956  
O -1.46734794 -5.01658175 -3.14804079  
O -1.09419992 -0.12354252 -3.99591860  
O -3.30604346 -0.52436486 -2.16597122  
O -2.92250466 -2.93660402 -4.41870128  
Zn -2.88116033 -1.00988241 -4.06174580  
Zn -1.65885418 -3.90077706 0.09863525  
Zn -3.42111452 -1.79580626 -0.65823989  
Zn -3.19981571 -4.15384332 -2.77117843  
O -3.38559128 -3.79603290 -0.84965220  
Zn -1.70237554 2.20591128 3.20221297  
Zn -3.50797919 0.69005117 1.60026074  
Zn -3.61248031 0.01486070 4.69309902  
O -3.53490866 1.51633593 3.43210567  
O -1.61422143 -3.25263649 1.98714072  
O -3.58941646 -1.25215084 1.25366793  
O -3.53383441 -2.03335287 4.48100458  
Zn -3.41418528 -2.68469089 2.63576593  
O -0.53708575 2.61900319 4.70552094  
O -1.96432697 -0.05155302 5.77163407  
Zn -0.25776063 0.75337479 5.27514472  
Zn -0.46019535 -4.18852489 3.27275455  
Zn -1.75963859 -2.00462184 5.33918518  
O -0.13718129 -2.79807309 4.63189357  
O -1.17698361 5.20250966 -2.95756524  
Zn -3.24741287 1.40882640 -1.66884600

Zn -1.22581224 1.83462773 -3.63155984  
Zn -2.95166373 4.41728218 -2.61291275  
O -3.01841689 2.57605131 -3.28704466  
Zn -0.09671729 4.95366531 1.98410320  
Zn -1.06512566 5.78221172 -1.03494274  
O -3.40958535 2.08697846 0.17987723  
O -1.39310862 3.50249284 1.71519105  
O -2.93690428 5.24686737 -0.72918935  
Zn -3.07796444 3.97230834 0.75466619  
Zn -0.91193820 -0.56442679 -1.98636030  
O -1.12484415 -1.92853185 -0.55439096  
O -1.21989272 0.60225544 1.85832796  
Zn -1.16612842 -1.32929753 1.39890896  
O -0.95644459 1.42744693 -1.53352845  
Zn -0.99471912 1.98955635 0.37362883  
Zn 5.64812748 -2.09435726 0.03927707  
Zn 5.55022290 -4.30781826 -2.17957916  
Zn 5.45391028 -5.23735978 1.02661975  
Zn 2.67943378 -5.59017028 -3.51211944  
Zn 3.73983990 -6.85409354 -0.60437911  
Zn 4.74864957 -8.10463626 2.00866870  
O 5.93669673 -3.97449451 -0.33971782  
O 3.91047699 -5.43845140 -2.02149663  
O 5.31017897 -7.10454860 0.53322890  
O 0.26873607 -7.66609907 1.56677723  
O 0.99096647 -6.47234572 -3.16371734  
O 2.30949704 -8.14702990 -0.76463881  
O 3.16132545 -9.24738745 2.24940044  
Zn 0.74284685 -7.84880889 -1.76780652  
Zn 1.86595124 -8.66840395 1.03445362  
O 5.53804026 -1.46516829 1.88553129  
O 5.25283672 -2.19758868 5.24526285  
O 5.05566088 -4.62138622 2.85249922  
O 2.17738272 -2.39236308 6.75343175  
O 3.49150534 -5.05447631 5.48864776  
O 4.79058739 -7.75442533 3.92722343  
Zn 5.25165039 -2.70222854 3.36823799  
Zn 3.61872446 -3.13807317 5.72824018  
Zn 4.69245313 -5.93220884 4.30605809  
Zn 0.48889378 -3.31114470 6.64131290  
Zn 1.80205513 -5.95217581 5.64446416  
Zn 2.92938075 -8.41062464 3.98505752  
O 0.27966733 -5.23702954 6.54626010  
O 1.43391143 -7.68901689 4.83728905  
O 5.72003539 1.74682371 0.79421678  
O 5.87690642 5.02297667 -0.24568487  
O 5.31890800 4.20324354 3.01368856

O 3.01925368 6.74873635 -1.06777166  
O 4.08352180 6.81005652 1.97498768  
O 5.14117095 6.72519283 5.18475523  
Zn 5.62843825 3.66625385 1.11985957  
Zn 4.28108440 6.05039649 0.20049722  
Zn 5.12982411 6.14346629 3.41578475  
Zn 0.55488794 6.47597388 4.45204843  
Zn 1.31904889 7.30237127 -0.35678650  
Zn 2.42765063 7.60471263 2.53050200  
Zn 3.29144186 7.30249614 5.56511304  
O 1.06210663 8.20493676 1.34031177  
O 1.93275496 7.83752440 4.40350833  
Zn 5.56197468 0.46458957 2.25710851  
Zn 5.11867988 -0.32963689 5.26834065  
Zn 5.43079461 2.90126327 4.48237476  
Zn 2.07900743 -0.52176948 6.79495051  
Zn 3.49917785 2.49344177 6.55246937  
Zn 4.82836735 5.25311229 6.42864043  
O 5.74435116 1.04304664 4.09815957  
O 3.49987810 0.55481968 6.03287871  
O 5.20275015 3.42465371 6.33409378  
O 0.34006557 5.14164759 5.89413725  
O 0.43822369 0.40066943 7.24828745  
O 2.03721975 3.15969858 7.62647082  
O 3.27128524 6.20576920 7.16712419  
Zn 0.35776702 2.31246029 7.73812217  
Zn 1.83031267 5.01689994 7.15791574  
O 5.80468750 -0.80906203 -1.44193051  
O 5.87442258 -3.35326116 -3.75910777  
O 5.73976531 -0.08039469 -4.70076597  
O 2.96888258 -4.61384561 -5.08422714  
O 4.45009963 -2.17354126 -6.57626784  
O 5.90683312 0.54580702 -7.96006726  
Zn 5.77748103 -1.47496680 -3.27462645  
Zn 4.38941482 -3.32358547 -5.01874865  
Zn 5.63938917 -0.69314457 -6.59460679  
Zn 1.27085927 0.53669317 -7.75273516  
Zn 1.38686535 -4.09043612 -6.04693887  
Zn 2.88803788 -1.89743720 -7.65764313  
Zn 4.13648695 0.78966726 -8.80051999  
O 1.37675164 -3.05988332 -7.69029077  
O 2.64767735 -0.33530008 -8.80079441  
Zn 5.82784428 1.10597053 -1.06309702  
Zn 5.78581792 4.12862205 -1.88939090  
Zn 6.04921951 1.81543963 -4.27864080  
Zn 2.96468623 5.87027101 -2.72164591  
Zn 4.39197225 4.00549928 -5.09811254

Zn 5.74561364 2.38118316 -7.32110569  
O 6.28553306 2.37551143 -2.45533136  
O 4.29387402 4.52737874 -3.15817667  
O 6.06970527 3.17334517 -5.65977968  
O 1.22221669 2.46965555 -7.32976497  
O 1.41402300 5.98378400 -3.87659286  
O 3.10060358 4.76710035 -6.32094094  
O 4.31428026 2.71516405 -8.63448081  
Zn 1.43323151 5.46126584 -5.78159899  
Zn 2.86859745 3.46113579 -7.71586324  
Zn -0.22491647 7.07425216 -3.45339937  
O 3.40958535 -2.08697848 -0.17987721  
O 1.39310862 -3.50249283 -1.71519104  
O 2.93690430 -5.24686738 0.72918935  
Zn 3.07796444 -3.97230835 -0.75466618  
Zn 0.09671728 -4.95366530 -1.98410320  
Zn 1.06512567 -5.78221172 1.03494272  
Zn 3.24741289 -1.40882641 1.66884603  
Zn 1.22581223 -1.83462774 3.63155984  
Zn 2.95166375 -4.41728219 2.61291277  
O 3.01841690 -2.57605132 3.28704468  
O 1.17698362 -5.20250967 2.95756523  
Zn 3.42111451 1.79580624 0.65823988  
Zn 1.65885415 3.90077704 -0.09863523  
Zn 3.19981569 4.15384326 2.77117843  
O 3.38559127 3.79603289 0.84965220  
O 0.43011621 5.38991224 0.13584956  
O 1.46734794 5.01658174 3.14804079  
O 3.30604347 0.52436485 2.16597122  
O 1.09419993 0.12354252 3.99591859  
O 2.92250466 2.93660400 4.41870128  
Zn 2.88116035 1.00988240 4.06174580  
Zn 1.09596137 3.66079432 4.58530592  
Zn 3.50797917 -0.69005121 -1.60026074  
Zn 1.70237552 -2.20591127 -3.20221297  
Zn 3.61248033 -0.01486074 -4.69309905  
O 3.53490865 -1.51633595 -3.43210568  
O 0.53708574 -2.61900319 -4.70552095  
O 1.96432698 0.05155300 -5.77163410  
Zn 0.25776064 -0.75337479 -5.27514473  
O 3.58941646 1.25215081 -1.25366794  
O 1.61422143 3.25263648 -1.98714070  
O 3.53383441 2.03335284 -4.48100459  
Zn 3.41418526 2.68469085 -2.63576595  
Zn 0.46019535 4.18852487 -3.27275455  
Zn 1.75963858 2.00462181 -5.33918516  
O 0.13718128 2.79807308 -4.63189357



Zn 0.99471909 -1.98955637 -0.37362881  
O 0.95644458 -1.42744695 1.53352846  
O 1.12484412 1.92853184 0.55439098  
Zn 0.91193818 0.56442678 1.98636030  
O 1.21989270 -0.60225546 -1.85832795  
Zn 1.16612840 1.32929751 -1.39890893

**MC-156**

Zn 7.53866839 4.30035087 3.94510207  
O 7.96667562 5.56067061 0.39018642  
Zn 4.76795901 0.23450251 2.26411172  
O 6.62578525 2.66619278 4.60490143  
Zn 8.60018281 3.76045203 0.78112066  
Zn 7.03937084 0.89132307 0.04642691  
O 6.64609064 0.51547403 1.90206802  
Zn 4.63962488 5.87257024 3.81286704  
O 8.61816967 3.24565609 2.65607853  
Zn 7.60066989 1.63573840 3.21618721  
O 6.52296240 5.89367223 3.37576372  
Zn 4.68103629 2.62053174 4.61382610  
O 3.85722715 1.17095485 3.60694187  
O 3.78320353 4.34348180 4.47801761  
Zn 6.91061905 6.53577852 1.59308716  
O 8.03666726 2.38763399 -0.48004633  
Zn 7.83830907 6.03502998 -1.44216765  
O 7.49761786 6.84862190 -5.19570755  
Zn 8.46121456 5.22617570 -4.58141987  
O 4.60940521 8.13758439 -4.25497722  
Zn 6.63276006 2.49457948 -5.36979218  
O 4.52088532 5.64810286 -6.47191333  
Zn 6.49323296 5.69593445 -6.46173210  
O 7.09483601 1.82532266 -3.59980361  
O 8.50054633 4.70512589 -2.67934438  
Zn 3.65639066 7.01888839 -5.41750691  
O 4.74508240 2.38193466 -5.83594900  
Zn 7.90556591 2.90521109 -2.29985479  
O 6.96281595 7.58891987 -2.01991889  
Zn 3.73058914 3.89359167 -6.27992483  
Zn 6.50620819 7.89314996 -3.88860237  
O 7.56072285 4.10322755 -5.94710960  
O 1.76312288 7.02515498 -5.51869596  
Zn -1.29026990 1.66033121 -3.50484177  
O -1.02574060 7.68063620 -3.81382218  
Zn 0.98072478 2.32353994 -5.72462187  
O -1.00543521 5.52991744 -6.51665551  
Zn 0.93931370 5.57557840 -6.52558044

|    |             |             |             |
|----|-------------|-------------|-------------|
| Zn | -1.41902067 | 7.30478672  | -1.95818118 |
| Zn | -1.98031984 | 6.56037187  | -5.12794134 |
| O  | -0.90261252 | 2.30243798  | -5.28751795 |
| Zn | -2.97983286 | 4.43565793  | -2.69287496 |
| O  | -2.99781954 | 4.95045415  | -4.56783273 |
| O  | -2.34632703 | 2.63543873  | -2.30194115 |
| Zn | -1.91831839 | 3.89575936  | -5.85685629 |
| O  | -2.41631687 | 5.80847570  | -1.43170802 |
| Zn | 0.85239092  | 7.96160777  | -4.17586621 |
| O  | 1.83714619  | 3.85262802  | -6.38977333 |
| Zn | 1.88976065  | 4.30251842  | 4.36816884  |
| Zn | -0.88585853 | 0.30296041  | 1.97684755  |
| O  | 1.09946472  | 2.54800728  | 4.56015906  |
| O  | -1.47448860 | 6.37078883  | 1.68804973  |
| O  | 1.01094479  | 0.05852773  | 2.34322100  |
| Zn | -1.01241068 | 5.70153093  | 3.45803756  |
| Zn | -2.28521685 | 5.29089918  | 0.38810074  |
| O  | -1.34246824 | 0.60718894  | 0.10816415  |
| Zn | 1.96395943  | 1.17722228  | 3.50575185  |
| Zn | -2.84086457 | 2.96993439  | 2.66966553  |
| O  | 0.87526744  | 5.81417503  | 3.92419212  |
| O  | -2.88019617 | 3.49098406  | 0.76759005  |
| Zn | -0.87288294 | 2.50017572  | 4.54997771  |
| O  | -1.87726784 | 1.34748825  | 3.28395317  |
| Zn | -2.21796058 | 2.16107947  | -0.46958697 |
| O  | -1.94037292 | 4.09288262  | 4.03535521  |
| O  | 1.94821832  | -2.16611666 | -3.70400740 |
| Zn | 4.93084501  | -1.55347222 | -0.47049160 |
| Zn | 3.79622709  | 0.87658471  | -5.17967615 |
| O  | 3.88765120  | -0.92615222 | 1.04962947  |
| Zn | -0.30395321 | -0.32330367 | -1.17834778 |
| O  | 1.92853231  | 0.74838007  | -5.25786823 |
| Zn | 6.11248972  | 0.32616650  | -2.97789005 |
| O  | 0.97772829  | -1.57180639 | -0.44486201 |
| O  | -0.37721460 | 0.07371959  | -3.00848016 |
| Zn | 3.92933799  | -2.05368937 | -3.66191100 |
| O  | 4.88210345  | -0.43357147 | -4.26133712 |
| Zn | 0.93433895  | -0.60809944 | -4.27649451 |
| O  | 6.19265524  | -0.26121815 | -1.19988691 |
| Zn | 1.99667542  | -2.61787489 | -1.77151865 |
| O  | 3.98096306  | -2.64771114 | -1.76859857 |
| Zn | 2.01541838  | -0.86021750 | 1.02287641  |
| Zn | -0.49214068 | 7.86994381  | 1.06613576  |
| O  | 1.63938686  | 10.84382141 | -0.14315584 |
| Zn | 1.69101178  | 10.24979972 | 1.75015654  |
| O  | 1.73269872  | 9.12226275  | -2.96138414 |
| Zn | 4.68601090  | 8.80420972  | 2.36474021  |

|    |             |             |             |
|----|-------------|-------------|-------------|
| O  | 4.64262134  | 9.76791678  | -1.46689278 |
| Zn | 3.62367448  | 10.81398516 | -0.14023578 |
| O  | 3.69181741  | 7.44773033  | 3.34611408  |
| O  | 0.73824592  | 8.62968194  | 2.34958247  |
| Zn | 3.60493157  | 9.05632837  | -2.93463173 |
| O  | 5.99756387  | 8.12239018  | 1.09672555  |
| Zn | 1.82412265  | 7.31952577  | 3.26792101  |
| O  | -0.57230496 | 8.45732803  | -0.71186756 |
| Zn | 5.92430199  | 8.51941334  | -0.73340682 |
| Zn | 0.68950506  | 9.74958231  | -1.44126277 |
| O  | 3.67213152  | 10.36222690 | 1.79225300  |
| Zn | -1.69736615 | 8.79218323  | -6.94220752 |
| O  | -3.29260024 | 7.95282071  | -6.05233167 |
| Zn | 10.79808373 | 3.14982677  | 3.20058440  |
| O  | 11.02090133 | 5.07764796  | 2.97870895  |
| O  | 11.10499499 | 1.61626218  | 2.02994819  |
| Zn | -1.59950605 | 6.08964617  | -8.60973846 |
| Zn | 10.91257255 | 2.09980906  | 0.18852586  |
| Zn | 8.83158328  | 8.33857662  | -6.22516846 |
| O  | 10.67199462 | 7.47454700  | 0.88318537  |
| Zn | 8.94787010  | 3.40746030  | -7.57233977 |
| Zn | 10.82649413 | 5.59137002  | 1.14533955  |
| Zn | 8.85736732  | 6.34266671  | -8.61396869 |
| O  | 10.83625460 | 0.61064982  | -1.00026868 |
| O  | 6.94983354  | 6.25261527  | -8.46087932 |
| Zn | 10.66670153 | 5.91362059  | -6.88747247 |
| O  | 9.95105168  | 7.56014145  | -7.59278270 |
| O  | 10.01427008 | 4.82355243  | -8.33906345 |
| O  | 4.37143952  | 12.78273472 | -0.43351584 |
| Zn | 9.53278785  | 8.41652205  | 2.08622672  |
| O  | 4.76033396  | -3.56281138 | -4.90866546 |
| Zn | 9.75191834  | -0.86035185 | -0.46101910 |
| O  | 10.59275217 | 4.03162084  | -0.03634051 |
| O  | 10.52861219 | 5.40442864  | -5.04570546 |
| Zn | 10.58893363 | 7.06270444  | -3.91168740 |
| O  | 10.89823939 | 6.48427176  | -2.14183393 |
| Zn | 10.57332769 | 4.56080546  | -1.96878909 |
| O  | 10.98853231 | 3.01242201  | -3.09306502 |
| Zn | 10.67847710 | 3.40459883  | -4.91285715 |
| O  | 9.87299015  | 8.64730700  | -4.60175908 |
| Zn | 10.45027575 | 7.92266233  | -0.95231158 |
| Zn | 10.61439275 | 1.15132686  | -2.81098606 |
| Zn | 9.03245021  | 0.87647030  | -5.62642882 |
| O  | 9.86567062  | 0.01425771  | -4.14379678 |
| O  | 9.63785818  | 9.54519115  | -1.53412157 |
| O  | -0.84211915 | 4.44889184  | -9.35185832 |
| Zn | 1.06480893  | 4.43370571  | -9.19670762 |

|    |             |             |             |
|----|-------------|-------------|-------------|
| O  | -0.92526183 | 7.91151921  | -8.40182659 |
| Zn | 0.98078368  | 7.92605964  | -8.23900995 |
| O  | 1.75576738  | 6.12624874  | -8.45724149 |
| Zn | 3.75934932  | 6.17504911  | -8.46119506 |
| O  | 4.38714240  | 8.02759753  | -8.35714259 |
| Zn | 6.24912408  | 8.09318262  | -8.05732432 |
| Zn | 6.33572044  | 4.43318432  | -9.05698455 |
| O  | 4.46879140  | 4.55558789  | -9.30431598 |
| Zn | -4.30544114 | 7.00428295  | -7.37311105 |
| O  | -1.00551271 | 10.04970072 | -5.71735420 |
| Zn | 0.72294921  | 11.88234688 | -3.41808267 |
| O  | 1.55118508  | 13.09085552 | -2.18798072 |
| Zn | 6.01054729  | 11.07711084 | -2.57801907 |
| O  | 7.03194012  | 9.99773456  | -3.92211159 |
| Zn | 8.82690236  | 9.52348183  | -3.26033946 |
| Zn | 6.24287594  | 10.13140805 | -5.72341460 |
| O  | 7.31247771  | 9.25277457  | -7.04449128 |
| O  | 4.56674342  | 12.05964531 | -3.46332394 |
| Zn | 3.40451542  | 12.83474616 | -2.19468349 |
| Zn | 6.10883404  | 12.19276311 | 0.38564196  |
| O  | 7.13081270  | 11.44592825 | -1.01456405 |
| O  | 4.88512310  | -1.38991324 | -7.14552041 |
| Zn | 3.77470989  | -2.75435634 | -6.46186173 |
| Zn | 6.47952464  | -3.39328408 | -3.88251190 |
| O  | 7.45031592  | -1.99427675 | -4.69606884 |
| Zn | 6.29520064  | -0.93112025 | -5.86671328 |
| O  | 7.25341522  | 0.72505252  | -6.46149899 |
| O  | 10.02109932 | 2.36122462  | -6.31973624 |
| Zn | 6.45063677  | 1.49031518  | -8.09120970 |
| O  | 7.46264660  | 2.96864799  | -8.76329541 |
| Zn | 8.54048940  | 10.40077218 | -0.23651978 |
| O  | 8.68193780  | 10.05663549 | 1.63213397  |
| O  | 8.96915117  | -2.08047234 | -1.69290759 |
| Zn | 8.82196263  | -1.43039865 | -3.47755307 |
| O  | 1.63411896  | 11.72334724 | -5.08549339 |
| Zn | 0.78430048  | 10.48723043 | -6.25609056 |
| Zn | 3.53312031  | 11.58668347 | -5.00910208 |
| O  | 1.69697255  | 9.60059506  | -7.67374283 |
| O  | 4.55789999  | 10.74299045 | -6.37218204 |
| Zn | 3.58981458  | 9.54537609  | -7.49458911 |
| Zn | 1.00211568  | 1.21476112  | -8.79684028 |
| O  | 1.92199854  | -0.40448020 | -8.40785349 |
| Zn | 3.81419133  | -0.24296837 | -8.24951126 |
| O  | 1.86036472  | 2.73799902  | -9.55493242 |
| O  | 4.78705101  | 1.21862527  | -8.98292113 |
| Zn | 3.75149146  | 2.77526672  | -9.34989941 |
| Zn | -4.99404254 | 7.04478393  | 0.89923235  |

|    |             |             |             |
|----|-------------|-------------|-------------|
| O  | -4.24532155 | 8.18185353  | 2.23204328  |
| O  | -5.21590398 | 7.58546046  | -0.91148526 |
| Zn | -3.20161300 | 9.62650949  | 1.56579957  |
| O  | -3.34880081 | 10.27658274 | -0.21884620 |
| Zn | -4.13156788 | 9.05646228  | -1.45073475 |
| Zn | -4.82992598 | 0.27344712  | -0.95944287 |
| O  | -4.01750900 | -1.34908196 | -0.37763279 |
| O  | -5.05164506 | 0.72156270  | -2.79493974 |
| Zn | -2.92013984 | -2.20466259 | -1.67523454 |
| Zn | -3.91243804 | -0.22041231 | -3.99798093 |
| O  | -3.06158799 | -1.86052580 | -3.54388833 |
| Zn | 1.80615905  | 8.43907826  | 6.33775651  |
| O  | 3.69835174  | 8.60059025  | 6.49609927  |
| O  | 6.19910071  | 11.98764643 | 2.24327890  |
| Zn | 7.11633877  | 10.36559899 | 2.67698239  |
| O  | 3.68619755  | 11.25252926 | 4.69792073  |
| Zn | 4.58190678  | 9.62351075  | 5.15123199  |
| O  | 6.09936543  | 9.25543741  | 3.94880879  |
| Zn | 7.14398259  | 7.65005689  | 4.53992627  |
| Zn | 7.18026086  | 5.27911698  | 6.64051992  |
| Zn | 9.83465249  | 6.05571917  | 4.04481414  |
| O  | 8.94030319  | 7.69329309  | 3.76200860  |
| Zn | -4.35262292 | 8.01391681  | -4.34511638 |
| O  | -3.52397467 | 9.31181742  | -3.25378530 |
| Zn | -1.73788726 | 9.75377299  | -3.92533618 |
| O  | -0.75967246 | 10.88244071 | -2.58901882 |
| Zn | -1.81169213 | 11.14292804 | -0.94332365 |
| O  | -0.96234376 | 12.35689478 | 0.26749029  |
| O  | 3.98623141  | -3.52723656 | 3.17373929  |
| Zn | 2.08723015  | -3.39057248 | 3.09734749  |
| O  | -4.40074919 | 5.83488571  | 4.40798199  |
| Zn | -3.41210034 | 7.31964022  | 3.71467449  |
| O  | -1.84229664 | 5.22746204  | 6.85154117  |
| O  | -1.63306529 | 7.47105780  | 4.54974481  |
| Zn | -0.67485079 | 9.12723063  | 3.95495909  |
| O  | 0.73522724  | 9.58602320  | 5.23376585  |
| Zn | 1.84564028  | 10.95046655 | 4.55010727  |
| Zn | -0.85917483 | 11.58939458 | 1.97075799  |
| O  | -1.82996628 | 10.19038766 | 2.78431533  |
| O  | 1.05360697  | -3.86353461 | 1.55156952  |
| Zn | 2.21583481  | -4.63863577 | 0.28292906  |
| Zn | -0.48848405 | -3.99665299 | -2.29739627 |
| O  | -1.51046271 | -3.24981817 | -0.89719026 |
| O  | -4.25263991 | -0.45119694 | 2.69000455  |
| Zn | -3.20655223 | -1.32737164 | 1.34858468  |
| Zn | -0.62252606 | -1.93529764 | 3.81166022  |
| O  | -1.41159001 | -1.80162433 | 2.01035721  |

|    |             |             |             |
|----|-------------|-------------|-------------|
| Zn | -0.39019720 | -2.88100057 | 0.66626468  |
| O  | 6.58269395  | -4.16078429 | -2.17924421 |
| Zn | 7.43204236  | -2.94681754 | -0.96843034 |
| O  | 4.06916516  | -4.89474513 | 0.27622661  |
| Zn | 4.89740103  | -3.68623656 | 1.50632857  |
| O  | 6.38002261  | -2.68633025 | 0.67726479  |
| Zn | 7.35823747  | -1.55766269 | 2.01358223  |
| O  | 6.62586325  | -1.85359060 | 3.80560035  |
| Zn | 7.31771649  | -0.59607296 | 5.03045360  |
| Zn | 9.97297316  | 0.18219356  | 2.43336247  |
| O  | 9.14432486  | -1.11570700 | 1.34203135  |
| O  | 1.93415264  | -3.05641917 | -6.60967501 |
| Zn | 1.03844333  | -1.42740068 | -7.06298628 |
| O  | -0.57875064 | -3.79153637 | -4.15503321 |
| Zn | -1.49598876 | -2.16948891 | -4.58873663 |
| O  | -0.47901543 | -1.05932744 | -5.86056321 |
| Zn | -1.52363252 | 0.54605311  | -6.45168056 |
| O  | -3.31995299 | 0.50281705  | -5.67376255 |
| Zn | -4.21430229 | 2.14039099  | -5.95656820 |
| Zn | -1.55991066 | 2.91699323  | -8.55227397 |
| O  | -0.79809930 | 1.24179909  | -8.13186773 |
| O  | -5.36818141 | 5.18368848  | 1.18131074  |
| Zn | -5.05812681 | 4.79151134  | 3.00110296  |
| Zn | -4.96858338 | 1.13340562  | 1.99993295  |
| O  | -5.27788865 | 1.71183824  | 0.23007934  |
| Zn | -4.95297766 | 3.63530476  | 0.05703480  |
| O  | -4.97240225 | 4.16448934  | -1.87541367 |
| Zn | -5.20614377 | 2.60473983  | -3.05709354 |
| O  | -5.40055099 | 3.11846222  | -4.89046290 |
| Zn | -5.29222224 | 6.09630122  | -2.10027980 |
| O  | -5.48464465 | 6.57984811  | -3.94170214 |
| O  | 1.06245045  | -2.54687897 | 4.46042713  |
| O  | 0.83329933  | 6.97748433  | 7.07116576  |
| Zn | -0.83028704 | 6.70579493  | 6.17945542  |
| Zn | 1.86885872  | 5.42084291  | 7.43814468  |
| Zn | 2.03053588  | -1.34926529 | 5.58283494  |
| O  | -1.69212769 | -1.05666433 | 5.13273707  |
| Zn | -0.71537045 | 3.76292570  | 7.14523038  |
| O  | 1.15155848  | 3.64052193  | 7.39256227  |
| Zn | 1.86100072  | 2.02106119  | 6.54944071  |
| O  | 1.23320763  | 0.16851278  | 6.44538877  |
| Zn | -0.62877393 | 0.10292754  | 6.14557008  |
| O  | -1.32948365 | 1.94349490  | 6.54912481  |
| O  | 3.86458277  | 2.06986155  | 6.54548718  |
| O  | 3.58565254  | 13.74186736 | 2.71593592  |
| Zn | 0.78852462  | 12.90988861 | -0.39886864 |
| Zn | 4.61823463  | 6.98134892  | 6.88508590  |

|    |             |             |             |
|----|-------------|-------------|-------------|
| O  | 0.86001614  | 11.75892170 | 2.99691123  |
| O  | 6.41844971  | 6.95431117  | 6.22011370  |
| Zn | 3.47060017  | 13.93888226 | 0.80075144  |
| Zn | 4.43325876  | 12.04427484 | 3.07646804  |
| Zn | 1.69164870  | 13.42201750 | 2.53434344  |
| O  | 1.56270164  | 14.22447979 | 0.78542192  |
| Zn | 4.83604998  | -2.29111999 | 4.34433668  |
| O  | 4.05764859  | -6.02836948 | -2.69717606 |
| Zn | 4.83182558  | -4.71377833 | -1.51288550 |
| Zn | 1.18709133  | -3.84816468 | -4.98822232 |
| Zn | 2.14975004  | -5.74277204 | -2.71250563 |
| O  | 2.03469768  | -5.54575715 | -4.62769010 |
| Zn | 3.92870149  | -5.22590720 | -4.44609761 |
| O  | 1.24891054  | -4.58662453 | -1.47823842 |
| O  | -4.39392018 | 3.37255764  | 6.42730890  |
| O  | -4.33070181 | 0.63596862  | 5.68102816  |
| Zn | -3.23701740 | 1.85344334  | 6.70221410  |
| O  | -4.90826234 | 2.79168150  | 3.13395095  |
| O  | 3.75998545  | 5.45811093  | 7.64317768  |
| Zn | -5.04635169 | 2.28248947  | 4.97571795  |
| Zn | 4.63956666  | 0.27005069  | 6.32725597  |
| Zn | -3.32752013 | 4.78864983  | 5.66058546  |
| O  | 3.92337782  | -1.40448481 | 5.76198901  |
| Zn | -3.21123324 | -0.14246652 | 4.31341402  |
| Zn | 4.55554147  | 3.76240420  | 7.28495369  |
| Zn | -4.24929060 | 4.55734362  | -8.04339236 |
| O  | -5.49485600 | 5.54496465  | -6.95093070 |
| Zn | -5.17773352 | 5.04628345  | -5.11233837 |
| O  | -3.17944780 | 3.11329303  | -7.37921896 |
| O  | -3.50963118 | 6.12300295  | -8.89327444 |
| O  | 6.46246952  | 3.74721836  | 7.44010442  |
| O  | 6.54561216  | 0.28459105  | 6.49007267  |
| Zn | 7.21985634  | 2.10646408  | 6.69798439  |
| O  | 8.79979785  | 5.08281705  | 5.46746472  |
| Zn | 9.92579139  | 1.19182735  | 5.46135707  |
| O  | 11.11520625 | 2.65114564  | 5.03917673  |
| O  | 8.91295040  | 0.24328975  | 4.14057765  |
| O  | 9.12998145  | 2.07310734  | 6.98152047  |
| Zn | 9.86964078  | 3.63876666  | 6.13163832  |

**MC-168**

|    |            |            |             |
|----|------------|------------|-------------|
| O  | 4.83615178 | 3.28821335 | -3.28722017 |
| Zn | 3.74123932 | 7.09591516 | -1.19243880 |
| O  | 0.78419822 | 4.90789686 | 1.37546584  |
| Zn | 0.84304735 | 3.19984754 | -3.23984584 |
| O  | 0.85024499 | 2.12157195 | 0.61276600  |

|    |             |             |             |
|----|-------------|-------------|-------------|
| Zn | 1.86335332  | 3.28130600  | 1.93552365  |
| O  | -0.23204772 | 4.28644839  | -1.90336485 |
| O  | 3.77437384  | 6.59871248  | 0.77664932  |
| Zn | -0.16907748 | 3.76558422  | -0.00554096 |
| Zn | 4.84649589  | 2.24585831  | 0.57667994  |
| O  | 1.84597616  | 1.59739773  | -2.68840365 |
| Zn | 0.77385410  | 5.95025190  | -2.48843427 |
| O  | 5.85239772  | 3.90966182  | -0.00838948 |
| Zn | 1.74604274  | 6.51117836  | 0.75940305  |
| O  | 3.90899866  | 1.10490964  | -0.72532056 |
| Zn | 3.75699668  | 4.91480421  | -3.84727797 |
| O  | 1.78880434  | 4.87761963  | -3.88221991 |
| Zn | 3.87430725  | 1.68493185  | -2.67115737 |
| O  | 1.71135133  | 7.09120057  | -1.18643377 |
| Zn | 5.78942748  | 4.43052600  | -1.90621336 |
| O  | 3.83154566  | 3.31849058  | 1.97046559  |
| Zn | 1.87911067  | 1.10019505  | -0.71931553 |
| O  | 4.77010501  | 6.07453827  | -2.52452033 |
| Zn | 4.77730265  | 4.99626267  | 1.32809152  |
| Zn | 7.29039908  | 4.30164075  | 3.69414234  |
| O  | 8.38383452  | 5.73541695  | 0.46035197  |
| Zn | 4.83949592  | -0.13084497 | 2.57845527  |
| O  | 6.38286218  | 2.70692756  | 4.42793600  |
| Zn | 7.85443296  | 3.79493440  | 0.58799477  |
| Zn | 7.44187608  | 0.63117314  | 0.03468953  |
| O  | 6.17566330  | 1.01615172  | 1.57186521  |
| Zn | 4.68801495  | 6.01694021  | 4.25747716  |
| O  | 8.43092827  | 3.30487352  | 2.42428529  |
| Zn | 7.35222766  | 1.75012296  | 2.99600124  |
| O  | 6.06424938  | 5.60436842  | 2.82613282  |
| Zn | 4.47277252  | 2.80643145  | 3.89406067  |
| O  | 3.89386276  | 0.87664141  | 3.97368824  |
| O  | 3.80830027  | 4.39855795  | 4.93673189  |
| Zn | 7.28887216  | 6.77699229  | 1.71335030  |
| O  | 8.47074678  | 2.21506381  | -0.50205202 |
| Zn | 8.22871488  | 6.28361695  | -1.41868727 |
| O  | 7.28655370  | 6.82759400  | -4.97903559 |
| Zn | 8.17882244  | 5.16738482  | -4.38280022 |
| O  | 4.69729603  | 8.51593521  | -4.52784618 |
| Zn | 6.15654058  | 2.72920926  | -4.81151506 |
| O  | 4.35912728  | 5.45109961  | -5.74933377 |
| Zn | 6.29193874  | 5.61639144  | -6.18299494 |
| O  | 7.45300473  | 1.59034011  | -3.77049800 |
| O  | 7.75324419  | 4.64345678  | -2.51297824 |
| Zn | 3.68560331  | 7.36422452  | -5.75493548 |
| O  | 4.84844564  | 2.20869014  | -6.25348047 |
| Zn | 8.31610407  | 2.69807383  | -2.39901746 |



|    |             |             |             |
|----|-------------|-------------|-------------|
| O  | 7.30102612  | 7.89669087  | -2.04415778 |
| Zn | 3.77243701  | 3.77855740  | -6.73604554 |
| Zn | 6.04370868  | 7.39085719  | -3.53597725 |
| O  | 7.35276383  | 4.00545157  | -5.75159229 |
| O  | 1.72648723  | 7.31946880  | -5.88544256 |
| Zn | -1.66852217 | 1.41911793  | -3.62510462 |
| O  | -0.55531331 | 7.17995850  | -3.48361953 |
| Zn | 0.93233505  | 2.17916999  | -6.16923149 |
| O  | -0.76251219 | 5.48918266  | -6.33969033 |
| Zn | 1.14757747  | 5.38967876  | -5.80581499 |
| Zn | -1.82152609 | 7.56493708  | -1.94644385 |
| Zn | -1.73187766 | 6.44598725  | -4.90775557 |
| O  | -0.44389938 | 2.59174180  | -4.73788715 |
| Zn | -2.23408297 | 4.40117581  | -2.49974910 |
| O  | -2.81057827 | 4.89123669  | -4.33603963 |
| O  | -2.76348452 | 2.46069327  | -2.37210629 |
| Zn | -1.67004909 | 3.89446946  | -5.60589667 |
| O  | -2.85039679 | 5.98104641  | -1.40970231 |
| Zn | 0.78085407  | 8.32695518  | -4.49020959 |
| O  | 1.81204972  | 3.79755225  | -6.84848621 |
| Zn | 1.84791298  | 4.41755281  | 4.82429122  |
| Zn | -0.42335869 | 0.80525303  | 1.62422292  |
| O  | 1.26122271  | 2.74501060  | 3.83757944  |
| O  | -1.83265473 | 6.60577010  | 1.85874368  |
| O  | 0.92305395  | -0.31982500 | 2.61609186  |
| Zn | -0.53619058 | 5.46690095  | 2.89976073  |
| Zn | -2.69575407 | 5.49803639  | 0.48726314  |
| O  | -1.68067613 | 0.29941933  | 0.13240345  |
| Zn | 1.93474668  | 0.83188568  | 3.84318116  |
| Zn | -2.55847244 | 3.02872539  | 2.47104590  |
| O  | 0.77190435  | 5.98742007  | 4.34172614  |
| O  | -2.13289420 | 3.55265344  | 0.60122392  |
| Zn | -0.67158875 | 2.57971875  | 4.27124061  |
| O  | -1.66620370 | 1.36851620  | 3.06728126  |
| Zn | -2.60836488 | 1.91249326  | -0.49306705 |
| O  | -1.73241383 | 4.19065863  | 3.83983796  |
| O  | 1.91694147  | -1.86691361 | -3.65040911 |
| Zn | 4.64620410  | -0.84541689 | -0.55246708 |
| Zn | 3.82004428  | 0.66789352  | -5.60245933 |
| O  | 3.97583524  | -1.33065200 | 1.28574696  |
| Zn | -0.63731882 | -0.63583943 | -1.24345213 |
| O  | 1.86282332  | 0.52669846  | -5.65959474 |
| Zn | 6.47301033  | 0.03809556  | -3.07450955 |
| O  | 1.25526720  | -0.86229882 | -0.55113678 |
| O  | -0.69116071 | -0.22015219 | -3.16163240 |
| Zn | 3.88478785  | -1.72903959 | -3.52977343 |
| O  | 4.58343150  | 0.11127677  | -3.80781704 |

|    |             |             |             |
|----|-------------|-------------|-------------|
| Zn | 1.19725783  | -0.02520368 | -3.83918828 |
| O  | 6.53229319  | -0.58290075 | -1.21254691 |
| Zn | 2.03331361  | -2.27056782 | -1.71873472 |
| O  | 4.00653496  | -2.36328450 | -1.66169007 |
| Zn | 2.01341388  | -1.26723869 | 1.28606546  |
| Zn | -0.85266033 | 8.15801465  | 1.16275523  |
| O  | 1.61381502  | 10.55939471 | -0.25006425 |
| Zn | 1.73556215  | 9.92514980  | 1.61801912  |
| O  | 1.64451475  | 9.52676221  | -3.19750128 |
| Zn | 4.42309216  | 8.22131389  | 1.92743396  |
| O  | 4.36508279  | 9.05840904  | -1.36061755 |
| Zn | 3.58703638  | 10.46667804 | -0.19301960 |
| O  | 3.75752667  | 7.66941175  | 3.74784041  |
| O  | 1.03691849  | 8.08483344  | 1.89606272  |
| Zn | 3.60693611  | 9.46334890  | -3.19781979 |
| O  | 6.31151070  | 8.41626240  | 1.24987807  |
| Zn | 1.80030572  | 7.52821669  | 3.69070501  |
| O  | -0.91194320 | 8.77901096  | -0.69920741 |
| Zn | 6.25766880  | 8.83194964  | -0.66830221 |
| Zn | 0.97414589  | 9.04152710  | -1.35928723 |
| O  | 3.70340853  | 10.06302382 | 1.73865478  |
| Zn | -1.51481744 | 8.53510366  | -6.86176151 |
| O  | -3.09029620 | 7.89297760  | -5.86512639 |
| Zn | 10.86481519 | 3.20434331  | 3.02137224  |
| O  | 11.01803033 | 5.10371547  | 2.82501530  |
| O  | 11.10274974 | 1.67746742  | 1.88787753  |
| Zn | -1.40937407 | 6.11447616  | -8.68236131 |
| Zn | 10.66360518 | 2.19559811  | 0.05357450  |
| Zn | 8.76621958  | 8.49723167  | -6.11770195 |
| O  | 10.84208688 | 7.52714414  | 0.87224720  |
| Zn | 8.89401887  | 3.21513684  | -7.56546734 |
| Zn | 10.57757865 | 5.57143835  | 0.97716429  |
| Zn | 8.67948963  | 6.28945343  | -8.43103804 |
| O  | 11.01753942 | 0.57943934  | -1.02731195 |
| O  | 6.75791298  | 6.19542294  | -8.25747161 |
| Zn | 10.47636313 | 5.86247533  | -6.71844619 |
| O  | 9.78487793  | 7.50883769  | -7.43453977 |
| O  | 9.84923071  | 4.78192687  | -8.18180601 |
| O  | 4.36531909  | 12.50581228 | -0.50200818 |
| Zn | 9.65403113  | 8.48936782  | 1.97800531  |
| O  | 4.75164650  | -3.28859162 | -4.82504720 |
| Zn | 9.88903169  | -0.86396471 | -0.57680147 |
| O  | 11.04381166 | 4.08064447  | -0.16681221 |
| O  | 10.32262597 | 5.34826115  | -4.86279755 |
| Zn | 10.26913085 | 7.07226056  | -3.90834236 |
| O  | 10.27097952 | 6.46907126  | -2.07504988 |
| Zn | 10.68090435 | 4.55519717  | -1.93411581 |

|    |             |             |             |
|----|-------------|-------------|-------------|
| O  | 10.35624036 | 2.96279279  | -3.03316684 |
| Zn | 10.35435061 | 3.37747353  | -4.91751523 |
| O  | 9.78083585  | 8.73232502  | -4.50928315 |
| Zn | 10.47783544 | 8.08308914  | -0.88970903 |
| Zn | 10.65400663 | 0.98171963  | -2.83045544 |
| Zn | 8.78858659  | 0.88923336  | -5.45335603 |
| O  | 9.97795336  | -0.09832130 | -4.22229697 |
| O  | 9.74039489  | 9.69232479  | -1.54302178 |
| O  | -0.68372099 | 4.47054736  | -9.34632782 |
| Zn | 1.22868750  | 4.43198194  | -8.93440122 |
| O  | -0.76663848 | 7.89849820  | -8.40775622 |
| Zn | 1.14741942  | 7.81054205  | -8.01203613 |
| O  | 1.88732170  | 6.25262925  | -8.89252133 |
| Zn | 3.72481282  | 6.20931181  | -8.57280285 |
| O  | 4.32624793  | 7.88341587  | -7.74249348 |
| Zn | 6.25043725  | 8.02787137  | -7.73560934 |
| Zn | 6.33877483  | 4.33154356  | -8.74595815 |
| O  | 4.41017066  | 4.37414068  | -8.70267284 |
| Zn | -4.11945287 | 6.95013928  | -7.20032531 |
| O  | -0.63558168 | 9.58918720  | -5.50591098 |
| Zn | 0.72776709  | 11.57679255 | -3.41443701 |
| O  | 1.45724326  | 12.99639480 | -2.28298316 |
| Zn | 6.07760169  | 11.15107329 | -2.63742991 |
| O  | 7.18108984  | 10.44704426 | -3.96656141 |
| Zn | 8.58354182  | 9.41412155  | -3.12028739 |
| Zn | 6.08605103  | 10.00988660 | -5.50149908 |
| O  | 7.24490558  | 9.33563562  | -6.92609064 |
| O  | 4.27767242  | 11.50417144 | -3.33482749 |
| Zn | 3.23029173  | 12.56922529 | -2.11241195 |
| Zn | 5.96287327  | 11.91727700 | 0.49332550  |
| O  | 6.87072596  | 10.88672308 | -0.86152490 |
| O  | 4.57993376  | -0.98617340 | -6.75203694 |
| Zn | 3.60020297  | -2.57227484 | -6.25601170 |
| Zn | 6.33181830  | -3.21867227 | -3.64750556 |
| O  | 7.17615742  | -1.60210887 | -4.27738341 |
| Zn | 6.36998658  | -0.96086474 | -5.94799400 |
| O  | 7.42098281  | 0.37205179  | -6.72275341 |
| O  | 9.93500198  | 2.23714217  | -6.28824184 |
| Zn | 6.28953841  | 1.48234705  | -7.83446492 |
| O  | 7.39943303  | 2.83885442  | -8.70367541 |
| Zn | 8.68615019  | 10.38831813 | -0.14660308 |
| O  | 8.80288024  | 10.14892632 | 1.72138900  |
| O  | 9.10795184  | -2.19580908 | -1.65511805 |
| Zn | 8.97700080  | -1.45610739 | -3.38560226 |
| O  | 1.55971046  | 11.86812236 | -5.18448814 |
| Zn | 0.89328501  | 10.57268660 | -6.37699226 |
| Zn | 3.43201483  | 11.63734537 | -5.15899383 |

|    |             |             |             |
|----|-------------|-------------|-------------|
| O  | 1.71386675  | 9.69624792  | -7.83232815 |
| O  | 4.60253577  | 10.91443652 | -6.44433569 |
| Zn | 3.56396401  | 9.73094075  | -7.48354886 |
| Zn | 1.11654342  | 1.21628259  | -8.93076352 |
| O  | 1.85611975  | -0.47629272 | -8.56263033 |
| Zn | 3.71640572  | -0.20890980 | -8.39772982 |
| O  | 1.87991711  | 2.74451452  | -9.73224073 |
| O  | 4.83598364  | 1.11948041  | -9.12418509 |
| Zn | 3.73404226  | 2.62003070  | -9.43023705 |
| Zn | -5.03365664 | 7.21439058  | 0.91870112  |
| O  | -4.35760337 | 8.29443151  | 2.31054265  |
| O  | -5.39718943 | 7.61667087  | -0.88444237 |
| Zn | -3.35665080 | 9.65221760  | 1.47384793  |
| O  | -3.48760185 | 10.39191929 | -0.25663628 |
| Zn | -4.26868170 | 9.06007492  | -1.33495286 |
| Zn | -4.85748544 | 0.11302107  | -1.02204529 |
| O  | -4.12004490 | -1.49621459 | -0.36873254 |
| O  | -5.22173689 | 0.66896607  | -2.78400151 |
| Zn | -3.06580020 | -2.19220792 | -1.76515125 |
| Zn | -4.03368113 | -0.29325761 | -3.88975962 |
| O  | -3.18253025 | -1.95281611 | -3.63314333 |
| Zn | 1.90394427  | 8.40502000  | 6.48597550  |
| O  | 3.76423024  | 8.67240293  | 6.65087601  |
| O  | 6.26110381  | 11.85697485 | 2.29950317  |
| Zn | 7.03284404  | 10.08439365 | 2.59810530  |
| O  | 3.77424473  | 11.12934467 | 4.72997374  |
| Zn | 4.58380141  | 9.36808388  | 4.99355260  |
| O  | 6.38697266  | 9.40322480  | 4.29068376  |
| Zn | 7.17393553  | 7.74028707  | 4.59850541  |
| Zn | 7.00609907  | 5.09109857  | 6.43588523  |
| Zn | 9.68402318  | 5.87787659  | 3.81324079  |
| O  | 8.60442068  | 7.39250338  | 3.30186501  |
| Zn | -4.19664863 | 7.74633905  | -4.23966326 |
| O  | -3.18226937 | 8.84233554  | -3.01739561 |
| Zn | -1.78741278 | 9.86970545  | -3.94140663 |
| O  | -1.06800731 | 11.17058498 | -2.81444982 |
| Zn | -1.72576575 | 10.86042657 | -1.01971193 |
| O  | -1.03247656 | 12.26924493 | 0.14786004  |
| O  | 4.06063953  | -3.67201216 | 3.27273381  |
| Zn | 2.18833516  | -3.44123516 | 3.24723951  |
| O  | -4.31465199 | 5.95896804  | 4.37648751  |
| Zn | -3.16823660 | 7.30687686  | 3.54160171  |
| O  | -1.77908304 | 5.35725578  | 6.79192109  |
| O  | -1.80063282 | 7.82405842  | 4.81099909  |
| Zn | -0.74963659 | 9.15697495  | 4.03623968  |
| O  | 1.04041624  | 9.18228361  | 4.84028262  |
| Zn | 2.02014702  | 10.76838505 | 4.34425738  |

|    |             |             |             |
|----|-------------|-------------|-------------|
| Zn | -0.71146830 | 11.41478248 | 1.73575124  |
| O  | -1.55580743 | 9.79821908  | 2.36562909  |
| O  | 1.34267758  | -3.30806123 | 1.42307316  |
| Zn | 2.39005826  | -4.37311508 | 0.20065762  |
| Zn | -0.34252328 | -3.72116680 | -2.40507983 |
| O  | -1.25037597 | -2.69061287 | -1.05022942 |
| O  | -4.16048587 | -0.53621482 | 2.59752882  |
| Zn | -2.96319183 | -1.21801135 | 1.20853306  |
| Zn | -0.46570104 | -1.81377639 | 3.58974475  |
| O  | -1.56073986 | -2.25093406 | 2.05480709  |
| Zn | -0.45725169 | -2.95496309 | 0.72567559  |
| O  | 6.65282655  | -4.07313472 | -2.05961436 |
| Zn | 7.34611574  | -2.66431636 | -0.89204239 |
| O  | 4.16310673  | -4.80028459 | 0.37122884  |
| Zn | 4.89258290  | -3.38068234 | 1.50268269  |
| O  | 6.68835729  | -2.97447476 | 0.90269549  |
| Zn | 7.40776276  | -1.67359524 | 2.02965231  |
| O  | 6.25593166  | -1.39307699 | 3.59415666  |
| Zn | 7.13516743  | -0.33899345 | 4.95000719  |
| Zn | 9.81699862  | 0.44977116  | 2.32790894  |
| O  | 8.80261936  | -0.64622532 | 1.10564129  |
| O  | 1.84610526  | -2.93323447 | -6.64172806 |
| Zn | 1.03654859  | -1.17197368 | -6.90530692 |
| O  | -0.64075381 | -3.66086465 | -4.21125750 |
| Zn | -1.41249405 | -1.88828345 | -4.50985963 |
| O  | -0.76662267 | -1.20711460 | -6.20243809 |
| Zn | -1.55358555 | 0.45582313  | -6.51025974 |
| O  | -2.98407069 | 0.80360682  | -5.21361933 |
| Zn | -4.06367320 | 2.31823361  | -5.72499511 |
| Zn | -1.38574908 | 3.10501163  | -8.34763956 |
| O  | -0.44242161 | 1.54961510  | -7.70176359 |
| O  | -4.73589036 | 5.23331743  | 1.12141252  |
| Zn | -4.73400062 | 4.81863669  | 3.00576090  |
| Zn | -4.64878085 | 1.12384965  | 1.99658804  |
| O  | -4.65062952 | 1.72703896  | 0.16329555  |
| Zn | -5.06055435 | 3.64091305  | 0.02236149  |
| O  | -5.42346166 | 4.11546574  | -1.74494211 |
| Zn | -4.95722867 | 2.62467186  | -2.88891861 |
| O  | -5.39768034 | 3.09239473  | -4.73676962 |
| Zn | -5.04325519 | 6.00051211  | -1.96532882 |
| O  | -5.48239974 | 6.51864279  | -3.79963185 |
| O  | 1.01781422  | -2.71832631 | 4.53258136  |
| O  | 0.78436635  | 7.07662979  | 7.21243076  |
| Zn | -0.66918842 | 6.71376315  | 5.92271060  |
| Zn | 1.88630773  | 5.57607950  | 7.51848273  |
| Zn | 2.05638598  | -1.53483054 | 5.57179453  |
| O  | -1.62455559 | -1.13952542 | 5.01433632  |

|    |             |             |             |
|----|-------------|-------------|-------------|
| Zn | -0.71842484 | 3.86456664  | 6.83420382  |
| O  | 1.21017933  | 3.82196953  | 6.79091851  |
| Zn | 1.89553717  | 1.98679840  | 6.66104853  |
| O  | 1.29410206  | 0.31269434  | 5.83073916  |
| Zn | -0.63008727 | 0.16823883  | 5.82385501  |
| O  | -1.13756299 | 2.00068726  | 6.34571729  |
| O  | 3.73302829  | 1.94348095  | 6.98076701  |
| O  | 3.58012593  | 13.51547233 | 2.64930955  |
| Zn | 0.65080279  | 12.85907355 | -0.55087198 |
| Zn | 4.50380657  | 6.97982761  | 7.01900919  |
| O  | 0.86870350  | 11.48470183 | 2.91329288  |
| O  | 6.06277160  | 6.64649510  | 5.79000926  |
| Zn | 3.46345649  | 13.68259971 | 0.73635466  |
| Zn | 4.55951922  | 11.93180902 | 3.17755569  |
| Zn | 1.69671155  | 13.16946310 | 2.45628005  |
| O  | 1.56449649  | 13.99465184 | 0.72378246  |
| Zn | 4.72706498  | -2.37657640 | 4.46523794  |
| O  | 4.05585350  | -5.79854163 | -2.63553678 |
| Zn | 4.96954720  | -4.66296334 | -1.36088233 |
| Zn | 1.06083077  | -3.73569881 | -5.08931002 |
| Zn | 2.15689350  | -5.48648951 | -2.64810898 |
| O  | 2.04022406  | -5.31936213 | -4.56106388 |
| Zn | 3.92363844  | -4.97335289 | -4.36803436 |
| O  | 1.25503090  | -4.30970207 | -1.40974614 |
| O  | -4.22888072 | 3.41418333  | 6.27005167  |
| O  | -4.16452795 | 0.68727251  | 5.52278544  |
| Zn | -3.05913965 | 1.90665677  | 6.51928371  |
| O  | -4.70227597 | 2.84784906  | 2.95104322  |
| O  | 3.74043288  | 5.45159568  | 7.82048641  |
| Zn | -4.85601314 | 2.33363488  | 4.80669186  |
| Zn | 4.47293056  | 0.38556815  | 6.10028180  |
| Zn | -3.27366888 | 4.98097337  | 5.65371301  |
| O  | 3.90648324  | -1.50013772 | 5.92057382  |
| Zn | -3.14586961 | -0.30112149 | 4.20594763  |
| Zn | 4.39166249  | 3.76412826  | 7.02264690  |
| Zn | -4.06206362 | 4.52154213  | -7.86584407 |
| O  | -5.32455763 | 5.50493622  | -6.79782618 |
| Zn | -5.24446519 | 4.99176689  | -4.93312656 |
| O  | -2.97572417 | 3.07747045  | -7.18324678 |
| O  | -3.34450793 | 6.08225088  | -8.73280424 |
| O  | 6.30407098  | 3.72556285  | 7.43457350  |
| O  | 6.38698847  | 0.29761201  | 6.49600190  |
| Zn | 7.02972406  | 2.08163404  | 6.77060700  |
| O  | 8.59607416  | 5.11863975  | 5.27149246  |
| Zn | 9.73980286  | 1.24597093  | 5.28857099  |
| O  | 10.94490762 | 2.69117398  | 4.88607186  |
| O  | 8.71064619  | 0.30313260  | 3.95337206  |

|    |            |            |            |
|----|------------|------------|------------|
| O  | 8.96485792 | 2.11385932 | 6.82104992 |
| Zn | 9.68241361 | 3.67456807 | 5.95408975 |

**SOD-12**

|    |             |             |             |
|----|-------------|-------------|-------------|
| Zn | -0.00013370 | 0.52702820  | -2.52690804 |
| Zn | -2.14364466 | -0.70149976 | -0.64444998 |
| Zn | 2.60142198  | -0.84313522 | -1.51589254 |
| Zn | 0.98832483  | -0.55116357 | 3.02599390  |
| Zn | -0.11462881 | -2.34035571 | -1.32121515 |
| Zn | 1.72630080  | 2.12904372  | -1.21937594 |
| Zn | -0.73792434 | -2.15332339 | 1.71843890  |
| Zn | 3.13191574  | 0.67726833  | 1.14359656  |
| Zn | 1.10294223  | 2.31631450  | 1.82003323  |
| Zn | 2.21163586  | -2.26696933 | 0.73839443  |
| Zn | -1.61304161 | 0.81895683  | 2.01499941  |
| Zn | -1.22343923 | 2.24275225  | -0.23934732 |
| O  | -0.97474786 | -0.65377157 | 2.96825668  |
| O  | 3.52391124  | -0.89661315 | 0.22019530  |
| O  | -0.74178436 | 2.54209917  | 1.64346779  |
| O  | 1.96298343  | 0.62953031  | -2.46919143 |
| O  | -1.11156413 | -0.95502041 | -2.29865781 |
| O  | 1.14035331  | -2.35774612 | 2.26470633  |
| O  | -0.15202906 | 2.33354531  | -1.76558385 |
| O  | 2.51069772  | 2.41043802  | 0.45103176  |
| O  | -1.52229407 | -2.43456223 | 0.04799932  |
| O  | 2.09972918  | 0.93086271  | 2.79761438  |
| O  | 1.73005473  | -2.56627215 | -1.14440577 |
| O  | -2.53563010 | 0.87242417  | 0.27888354  |

**SOD-21**

|   |             |             |             |
|---|-------------|-------------|-------------|
| O | 2.77927179  | -0.05859659 | 4.13159746  |
| O | 2.75827583  | 5.61877418  | 4.18852500  |
| O | 8.43564659  | 5.59777820  | 4.24545253  |
| O | -0.05859658 | 4.13159745  | 2.77927177  |
| O | 5.61877420  | 4.18852500  | 2.75827581  |
| O | 5.59777822  | 4.24545255  | 8.43564655  |
| O | 2.75648982  | -0.07654490 | 1.32824194  |
| O | 2.71931758  | 5.58200483  | 1.37037982  |
| O | 2.79504517  | 5.65773242  | 7.00667019  |
| O | 8.45359490  | 5.62056017  | 7.04880805  |
| O | -0.07654488 | 1.32824195  | 2.75648983  |
| O | 5.58200481  | 1.37037980  | 2.71931761  |
| O | 5.65773240  | 7.00667019  | 2.79504520  |
| O | 5.62056016  | 7.04880805  | 8.45359491  |
| O | 4.13159746  | 2.77927178  | -0.05859655 |

|    |            |            |             |
|----|------------|------------|-------------|
| O  | 4.18852500 | 2.75827581 | 5.61877419  |
| O  | 4.24545254 | 8.43564659 | 5.59777824  |
| O  | 1.32824195 | 2.75648984 | -0.07654490 |
| O  | 1.37037980 | 2.71931761 | 5.58200480  |
| O  | 7.00667019 | 2.79504519 | 5.65773238  |
| O  | 7.04880805 | 8.45359489 | 5.62056017  |
| Zn | 0.24166621 | 2.72161915 | 4.10702664  |
| Zn | 5.72916843 | 2.64788156 | 4.18852500  |
| Zn | 5.65543083 | 8.13538379 | 4.27002336  |
| Zn | 2.72161915 | 4.10702666 | 0.24166624  |
| Zn | 2.64788156 | 4.18852500 | 5.72916846  |
| Zn | 8.13538379 | 4.27002335 | 5.65543085  |
| Zn | 0.20684235 | 2.73696241 | 1.41539703  |
| Zn | 5.23639131 | 2.79025172 | 1.43808086  |
| Zn | 5.58679827 | 3.14065870 | 6.93896914  |
| Zn | 5.64008759 | 8.17020766 | 6.96165297  |
| Zn | 2.73696239 | 1.41539704 | 0.20684235  |
| Zn | 2.79025176 | 1.43808085 | 5.23639129  |
| Zn | 3.14065870 | 6.93896916 | 5.58679823  |
| Zn | 8.17020765 | 6.96165295 | 5.64008757  |
| Zn | 4.10702665 | 0.24166620 | 2.72161915  |
| Zn | 4.18852500 | 5.72916844 | 2.64788155  |
| Zn | 4.27002335 | 5.65543086 | 8.13538377  |
| Zn | 1.41539704 | 0.20684233 | 2.73696242  |
| Zn | 1.43808084 | 5.23639130 | 2.79025178  |
| Zn | 6.93896915 | 5.58679824 | 3.14065870  |
| Zn | 6.96165297 | 5.64008761 | 8.17020765  |

**SOD-29**

|   |             |             |             |
|---|-------------|-------------|-------------|
| O | 2.64705096  | 5.71870963  | 9.80378129  |
| O | 8.37705004  | 5.35622793  | 9.78887056  |
| O | 8.37705001  | 11.11882781 | 9.75138835  |
| O | 14.10704901 | 5.71870959  | 9.80378123  |
| O | 5.40746292  | 4.21451051  | 8.35896435  |
| O | 5.37278374  | 4.13631127  | 14.07826514 |
| O | 5.52975974  | 9.83706678  | 8.30047343  |
| O | 11.34663708 | 4.21451044  | 8.35896429  |
| O | 11.38131628 | 4.13631127  | 14.07826513 |
| O | 11.22434026 | 9.83706676  | 8.30047338  |
| O | 2.61078714  | 5.68688771  | 12.61449737 |
| O | 8.37704997  | 5.60486102  | 6.98784535  |
| O | 8.37705005  | 5.46597126  | 12.72687154 |
| O | 8.37704999  | 11.26183370 | 6.94129739  |
| O | 14.14331284 | 5.68688768  | 12.61449730 |
| O | 5.50472093  | 7.01827510  | 8.34649521  |
| O | 5.53948454  | 6.91369747  | 13.96967822 |



|    |             |             |             |
|----|-------------|-------------|-------------|
| O  | 11.24937905 | 7.01827508  | 8.34649519  |
| O  | 11.21461548 | 6.91369746  | 13.96967819 |
| O  | 3.93651087  | 2.82609188  | 11.18717524 |
| O  | 4.13985179  | 8.47478746  | 11.24588109 |
| O  | 10.02664915 | 2.84160341  | 11.23435521 |
| O  | 9.77118400  | 8.41817734  | 5.52793854  |
| O  | 9.78313499  | 8.27476200  | 11.13607704 |
| O  | 6.72745088  | 2.84160337  | 11.23435522 |
| O  | 6.98291595  | 8.41817735  | 5.52793856  |
| O  | 6.97096503  | 8.27476196  | 11.13607700 |
| O  | 12.81758910 | 2.82609188  | 11.18717521 |
| O  | 12.61424823 | 8.47478745  | 11.24588105 |
| Zn | 5.40377756  | 3.14229230  | 9.87777569  |
| Zn | 5.37235861  | 8.53673764  | 9.74155248  |
| Zn | 11.35032243 | 3.14229231  | 9.87777566  |
| Zn | 11.38174139 | 8.53673763  | 9.74155245  |
| Zn | 2.85497708  | 4.33625152  | 11.19257361 |
| Zn | 8.37705000  | 3.77974577  | 11.08603589 |
| Zn | 8.37704999  | 9.77401314  | 5.80243808  |
| Zn | 8.37705002  | 9.59427067  | 10.79746269 |
| Zn | 13.89912293 | 4.33625148  | 11.19257356 |
| Zn | 5.33696294  | 3.04638002  | 12.54768033 |
| Zn | 5.87593751  | 8.40681901  | 7.01835444  |
| Zn | 5.54825624  | 8.01581271  | 12.48238621 |
| Zn | 11.41713707 | 3.04638001  | 12.54768035 |
| Zn | 10.87816245 | 8.40681898  | 7.01835441  |
| Zn | 11.20584378 | 8.01581274  | 12.48238621 |
| Zn | 2.96838931  | 7.02432631  | 11.22145647 |
| Zn | 8.37704998  | 7.07891840  | 5.88260130  |
| Zn | 8.37705002  | 6.79812218  | 11.09318260 |
| Zn | 13.78571070 | 7.02432629  | 11.22145639 |
| Zn | 4.15084569  | 5.63718585  | 8.70413350  |
| Zn | 4.08821475  | 5.58616118  | 13.74449520 |
| Zn | 9.81714320  | 5.43342849  | 8.28169764  |
| Zn | 9.97999006  | 5.41929600  | 13.71399100 |
| Zn | 9.72281942  | 10.92357012 | 8.32468725  |
| Zn | 6.93695677  | 5.43342853  | 8.28169766  |
| Zn | 6.77410997  | 5.41929602  | 13.71399096 |
| Zn | 7.03128058  | 10.92357014 | 8.32468729  |
| Zn | 12.60325428 | 5.63718582  | 8.70413344  |
| Zn | 12.66588529 | 5.58616117  | 13.74449520 |

**SOD-30**

|   |            |            |            |
|---|------------|------------|------------|
| O | 2.67258866 | 5.50575601 | 4.08893514 |
| O | 8.33238424 | 5.48267632 | 4.11438284 |
| O | 8.41619808 | 5.57061617 | 9.75124659 |

|    |             |             |             |
|----|-------------|-------------|-------------|
| O  | 8.38305673  | 11.24397522 | 9.81974181  |
| O  | 14.05769636 | 11.23411755 | 9.86232715  |
| O  | 5.50575606  | 4.08893513  | 2.67258866  |
| O  | 5.48267631  | 4.11438287  | 8.33238422  |
| O  | 5.57061616  | 9.75124662  | 8.41619807  |
| O  | 11.24397522 | 9.81974178  | 8.38305675  |
| O  | 11.23411760 | 9.86232717  | 14.05769634 |
| O  | 2.69640364  | 5.51998246  | 6.89177284  |
| O  | 8.37104327  | 5.51012477  | 6.93435819  |
| O  | 8.33790192  | 11.18348383 | 7.00285341  |
| O  | 8.42171577  | 11.27142368 | 12.63971717 |
| O  | 14.08151134 | 11.24834398 | 12.66516485 |
| O  | 5.51998240  | 6.89177283  | 2.69640366  |
| O  | 5.51012478  | 6.93435822  | 8.37104325  |
| O  | 11.18348384 | 7.00285338  | 8.33790193  |
| O  | 11.27142368 | 12.63971713 | 8.42171579  |
| O  | 11.24834395 | 12.66516487 | 14.08151135 |
| O  | 4.08893516  | 2.67258868  | 5.50575604  |
| O  | 4.11438283  | 8.33238424  | 5.48267633  |
| O  | 9.75124658  | 8.41619808  | 5.57061619  |
| O  | 9.81974182  | 8.38305671  | 11.24397526 |
| O  | 9.86232713  | 14.05769636 | 11.23411759 |
| O  | 6.89177287  | 2.69640364  | 5.51998242  |
| O  | 6.93435819  | 8.37104328  | 5.51012475  |
| O  | 7.00285342  | 8.33790193  | 11.18348380 |
| O  | 12.63971718 | 8.42171576  | 11.27142367 |
| O  | 12.66516484 | 14.08151132 | 11.24834396 |
| Zn | 5.49202350  | 2.96296950  | 4.16110606  |
| Zn | 5.53103130  | 7.99307753  | 4.19532806  |
| Zn | 5.90977481  | 8.32849916  | 9.68860462  |
| Zn | 11.35621830 | 8.27723662  | 9.80809133  |
| Zn | 11.26838669 | 13.76304852 | 9.90096372  |
| Zn | 2.96296950  | 4.16110607  | 5.49202361  |
| Zn | 7.99307755  | 4.19532805  | 5.53103132  |
| Zn | 8.32849910  | 9.68860464  | 5.90977481  |
| Zn | 8.27723666  | 9.80809131  | 11.35621830 |
| Zn | 13.76304854 | 9.90096372  | 11.26838683 |
| Zn | 5.48571330  | 2.99105148  | 6.85313628  |
| Zn | 5.39788171  | 8.47686337  | 6.94600867  |
| Zn | 10.84432519 | 8.42560084  | 7.06549537  |
| Zn | 11.22306871 | 8.76102247  | 12.55877194 |
| Zn | 11.26207650 | 13.79113051 | 12.59299394 |
| Zn | 2.99105146  | 6.85313629  | 5.48571315  |
| Zn | 8.47686335  | 6.94600868  | 5.39788170  |
| Zn | 8.42560090  | 7.06549537  | 10.84432519 |
| Zn | 8.76102246  | 12.55877194 | 11.22306869 |
| Zn | 13.79113050 | 12.59299394 | 11.26207639 |

|    |             |             |             |
|----|-------------|-------------|-------------|
| Zn | 4.16110605  | 5.49202344  | 2.96296950  |
| Zn | 4.19532806  | 5.53103137  | 7.99307751  |
| Zn | 9.68860465  | 5.90977478  | 8.32849912  |
| Zn | 9.80809132  | 11.35621827 | 8.27723665  |
| Zn | 9.90096372  | 11.26838673 | 13.76304854 |
| Zn | 6.85313628  | 5.48571328  | 2.99105147  |
| Zn | 6.94600868  | 5.39788173  | 8.47686336  |
| Zn | 7.06549536  | 10.84432522 | 8.42560089  |
| Zn | 12.55877193 | 11.22306863 | 8.76102249  |
| Zn | 12.59299395 | 11.26207655 | 13.79113050 |

**SOD-57**

|    |             |             |             |
|----|-------------|-------------|-------------|
| Zn | 6.51173025  | 9.36511259  | 5.11778514  |
| Zn | 6.45631691  | 3.55179709  | 5.04226669  |
| Zn | 6.49144087  | 9.39642115  | 10.76522030 |
| Zn | 6.57253160  | 4.07623321  | 10.59593183 |
| Zn | 1.10686961  | 9.37368126  | 5.11305405  |
| Zn | 11.83606230 | 3.65588355  | 5.18355450  |
| Zn | 12.33022464 | 9.48062070  | 10.79471668 |
| Zn | 12.20847036 | 4.05635967  | 10.63682472 |
| Zn | 6.50729247  | 14.74920692 | 10.67156762 |
| Zn | 6.42134837  | 9.30213406  | 7.95267385  |
| Zn | 6.41127598  | 3.53877403  | 7.84967388  |
| Zn | 6.87112666  | 9.39052474  | 13.52663352 |
| Zn | 6.49828883  | 8.99536731  | 2.35653256  |
| Zn | 1.13494064  | 9.37161840  | 7.80331535  |
| Zn | 12.11249982 | 8.93614663  | 8.07125318  |
| Zn | 6.52711626  | 14.71975004 | 7.98538560  |
| Zn | 12.39569260 | 3.48709989  | 7.90444004  |
| Zn | 11.87009324 | 9.36196382  | 13.54596135 |
| Zn | 6.54733446  | 4.01280023  | 2.28771905  |
| Zn | 7.89443950  | 6.42125488  | 6.54469654  |
| Zn | 8.04391612  | 1.13485038  | 6.47498851  |
| Zn | 7.99731610  | 6.41093099  | 12.30805841 |
| Zn | 7.86184422  | 6.52725516  | 1.12708564  |
| Zn | 2.32047151  | 6.87091400  | 6.45620412  |
| Zn | 13.49057233 | 6.49830328  | 6.85158473  |
| Zn | 7.77572332  | 12.11238410 | 6.91093160  |
| Zn | 2.30103239  | 11.86987850 | 6.48498447  |
| Zn | 13.55927907 | 6.54713340  | 11.83415669 |
| Zn | 7.94241667  | 12.39534439 | 12.35999431 |
| Zn | 8.93621369  | 7.77577431  | 3.73452933  |
| Zn | 9.36228004  | 2.30107989  | 3.97680570  |
| Zn | 9.30232301  | 7.89425036  | 9.42567021  |
| Zn | 9.39094756  | 2.32030539  | 8.97577242  |
| Zn | 3.48715381  | 7.94235967  | 3.45145583  |

|    |             |             |             |
|----|-------------|-------------|-------------|
| Zn | 3.53895847  | 7.99700080  | 9.43587351  |
| Zn | 14.71993570 | 7.86177626  | 9.31978613  |
| Zn | 8.99530929  | 13.49037758 | 9.34886187  |
| Zn | 4.01273885  | 13.55898079 | 9.29992919  |
| Zn | 9.37191882  | 8.04350035  | 14.71207899 |
| Zn | 10.72932710 | 6.51170114  | 6.48178476  |
| Zn | 10.73417799 | 1.10684293  | 6.47298700  |
| Zn | 10.80472252 | 6.45603249  | 12.29509609 |
| Zn | 5.08189368  | 6.49128694  | 6.45035108  |
| Zn | 5.05226791  | 12.33007718 | 6.36640845  |
| Zn | 5.25106657  | 6.57215363  | 11.77054711 |
| Zn | 5.17566331  | 6.50736956  | 1.09756680  |
| Zn | 10.66331818 | 11.83578165 | 12.19124276 |
| Zn | 5.21004789  | 12.20808747 | 11.79066624 |
| Zn | 9.48080328  | 5.05233942  | 3.51672989  |
| Zn | 9.36517530  | 10.72914189 | 9.33534831  |
| Zn | 9.39672846  | 5.08170961  | 9.35551804  |
| Zn | 3.65583228  | 10.66323959 | 4.01114355  |
| Zn | 3.55186023  | 10.80440996 | 9.39089490  |
| Zn | 14.74951419 | 5.17559516  | 9.33954818  |
| Zn | 9.37385783  | 10.73376120 | 14.74020982 |
| Zn | 4.05653822  | 5.20999562  | 3.63860744  |
| Zn | 4.07653399  | 5.25076975  | 9.27454064  |
| O  | 9.31703707  | 6.41650031  | 5.09248685  |
| O  | 9.38355924  | 0.80473816  | 5.08212769  |
| O  | 9.38892480  | 6.45109121  | 10.79846577 |
| O  | 3.62393997  | 6.52979600  | 5.03314231  |
| O  | 3.60805286  | 12.17336573 | 5.07506526  |
| O  | 3.74817495  | 6.52936993  | 10.69406108 |
| O  | 15.05426167 | 6.53754664  | 10.72472945 |
| O  | 9.33796486  | 12.20138509 | 10.79956234 |
| O  | 3.72110650  | 12.24885240 | 10.70238662 |
| O  | 9.32618787  | 6.49637873  | 7.94334221  |
| O  | 9.39273729  | 0.83051399  | 7.87992377  |
| O  | 9.39553625  | 6.54765272  | 13.63930980 |
| O  | 9.31992283  | 6.54267898  | 2.27474068  |
| O  | 3.62990606  | 6.55320631  | 7.87323662  |
| O  | 15.01044871 | 6.50175892  | 7.92249442  |
| O  | 9.28879441  | 12.14861375 | 7.98137411  |
| O  | 3.60710255  | 12.26202868 | 7.88900473  |
| O  | 3.68287385  | 6.47073774  | 2.20736280  |
| O  | 9.40114788  | 12.21971572 | 13.62527027 |
| O  | 7.86573883  | 9.28882348  | 3.69834070  |
| O  | 7.95823804  | 3.60713651  | 3.58468417  |
| O  | 7.90364717  | 9.32597060  | 9.35057791  |
| O  | 7.97387731  | 3.62969335  | 9.29350730  |
| O  | 2.22184088  | 9.40105433  | 3.62712476  |

|   |             |             |             |
|---|-------------|-------------|-------------|
| O | 2.20767946  | 9.39519767  | 9.29918540  |
| O | 13.57225149 | 9.31983237  | 9.30439818  |
| O | 13.63974987 | 3.68278030  | 9.37609700  |
| O | 7.92437015  | 15.01023317 | 9.34544713  |
| O | 7.96694574  | 9.39227600  | 15.01644666 |
| O | 6.49650283  | 7.90352285  | 6.52089325  |
| O | 6.54802320  | 2.20755778  | 6.45142297  |
| O | 6.55345148  | 7.97350672  | 12.21717573 |
| O | 6.50175754  | 7.92449032  | 0.83663317  |
| O | 0.83063459  | 7.96670068  | 6.45446991  |
| O | 12.14874081 | 7.86573713  | 6.55815965  |
| O | 6.54255690  | 13.57212785 | 6.52728124  |
| O | 12.22008415 | 2.22184624  | 6.44568699  |
| O | 12.26227345 | 7.95798971  | 12.23985160 |
| O | 6.47073682  | 13.63937815 | 12.16433419 |
| O | 10.77217513 | 3.60814561  | 3.67340271  |
| O | 10.75450246 | 9.31687872  | 9.43051422  |
| O | 10.81397267 | 3.62379053  | 9.31697561  |
| O | 5.04755038  | 9.33793442  | 3.64550793  |
| O | 5.04852140  | 9.38864505  | 9.39580802  |
| O | 5.12213523  | 15.05398565 | 9.30959969  |
| O | 10.76474142 | 9.38315942  | 15.04228233 |
| O | 5.14485336  | 3.72108122  | 3.59780308  |
| O | 5.15304921  | 3.74789786  | 9.31728486  |
| O | 6.41650049  | 10.75437493 | 6.53010815  |
| O | 6.45133841  | 5.04839821  | 6.45809621  |
| O | 6.52991873  | 10.81360049 | 12.22320373 |
| O | 6.52973595  | 5.15268292  | 12.09884915 |
| O | 0.80473554  | 10.76449543 | 6.46371123  |
| O | 12.20163593 | 5.04755189  | 6.50892872  |
| O | 12.17349159 | 10.77192460 | 12.23896423 |
| O | 12.24921972 | 5.14461010  | 12.12578784 |
| O | 6.53766982  | 5.12225777  | 0.79275941  |

**SOD-60**

|    |             |             |            |
|----|-------------|-------------|------------|
| Zn | -0.10967070 | 2.82496009  | 1.34310243 |
| Zn | -0.13107527 | -2.96997543 | 1.28733084 |
| Zn | -0.06416812 | 2.87033541  | 6.98362184 |
| Zn | 0.00233266  | -2.44226859 | 6.83311162 |
| Zn | -5.46679777 | 2.85333895  | 1.37284272 |
| Zn | 5.20293923  | 2.75868126  | 1.49349274 |
| Zn | 5.24806311  | -2.87155891 | 1.43764430 |
| Zn | 5.73076358  | 2.89199186  | 7.03926404 |
| Zn | 5.63257834  | -2.48714844 | 6.88883018 |
| Zn | -0.09277353 | 8.22746077  | 6.95400420 |
| Zn | -0.10046123 | 2.86118702  | 4.16336248 |

|    |             |             |             |
|----|-------------|-------------|-------------|
| Zn | -0.13773340 | -2.94832495 | 4.08318508  |
| Zn | 0.30728639  | 2.86125323  | 9.75544089  |
| Zn | -0.10063525 | 2.45356450  | -1.42872558 |
| Zn | -5.42575681 | 2.84370542  | 4.06224511  |
| Zn | 5.70905237  | 2.89871226  | 4.24341039  |
| Zn | -0.08320267 | 8.18648445  | 4.26460077  |
| Zn | 5.82754579  | -3.06656173 | 4.16322886  |
| Zn | 5.30035734  | 2.81952662  | 9.79617898  |
| Zn | -0.05869244 | -2.53950330 | -1.46957500 |
| Zn | 1.35838008  | -0.05630544 | 2.70451847  |
| Zn | 1.45961601  | -5.38160288 | 2.72177478  |
| Zn | 1.43843368  | -0.09383324 | 8.51403192  |
| Zn | 1.25725746  | -0.03882155 | -2.62077707 |
| Zn | -4.23370779 | 0.35131955  | 2.70435018  |
| Zn | 6.95045890  | -0.05637426 | 3.11226059  |
| Zn | 1.27820520  | 5.75320665  | 2.66724894  |
| Zn | -4.27455498 | 5.34438728  | 2.74629528  |
| Zn | 6.99120187  | -0.01464988 | 8.10533156  |
| Zn | 1.35825486  | 5.87144070  | 8.63252811  |
| Zn | 2.85452811  | 1.32251744  | -0.18740777 |
| Zn | 2.77559883  | -4.23026470 | 0.22116866  |
| Zn | 2.81712871  | 1.40243984  | 5.62210759  |
| Zn | 2.81743154  | -4.18962880 | 5.21423976  |
| Zn | -3.11075221 | 1.40244242  | -0.30576741 |
| Zn | -2.99238655 | 1.48236480  | 5.65951282  |
| Zn | 8.14242600  | 1.30143266  | 5.60473405  |
| Zn | 2.40926332  | 6.99450868  | 5.62241330  |
| Zn | -2.58380787 | 7.03514676  | 5.58058560  |
| Zn | 2.79976027  | 1.50344470  | 10.94740493 |
| Zn | 4.17863946  | -0.06545498 | 2.74080875  |
| Zn | 4.14901941  | -5.42258042 | 2.71220097  |
| Zn | 4.23428733  | -0.08711411 | 8.53574046  |
| Zn | -1.46187997 | -0.02007721 | 2.69531167  |
| Zn | 4.02813165  | 5.24714901  | 2.80731196  |
| Zn | -1.51764904 | 5.77485828  | 2.67390988  |
| Zn | -1.31148440 | 0.04619921  | 8.00792159  |
| Zn | -1.43214497 | -0.04845372 | -2.66181527 |
| Zn | 4.08385574  | 5.29202629  | 8.43755758  |
| Zn | -1.36733036 | 5.67643947  | 8.05304808  |
| Zn | 2.71438546  | 4.07241884  | 0.31876851  |
| Zn | 2.84792941  | -1.47333697 | -0.20917787 |
| Zn | 2.78077842  | 4.22269797  | 5.63137637  |
| Zn | 2.82639630  | -1.41781828 | 5.58575606  |
| Zn | -2.91585409 | 4.12802233  | 0.27377162  |
| Zn | -3.01415547 | 4.27821919  | 5.65291540  |
| Zn | 8.18352580  | -1.38796928 | 5.61424228  |
| Zn | 2.80926989  | 4.19284662  | 10.98850594 |

|    |             |             |             |
|----|-------------|-------------|-------------|
| Zn | -2.53121420 | -1.32313784 | -0.11087123 |
| Zn | -2.48621163 | -1.26753676 | 5.51936833  |
| O  | 2.80227520  | -0.08080805 | 1.30787576  |
| O  | 2.79665631  | -5.72716472 | 1.32873025  |
| O  | 2.84172284  | -0.04148499 | 7.01871836  |
| O  | -2.93381927 | 0.01037141  | 1.27941477  |
| O  | 2.74313641  | 5.57415569  | 1.39552365  |
| O  | -2.95388597 | 5.62443492  | 1.35000235  |
| O  | -2.81324224 | 0.01741005  | 6.93119679  |
| O  | 8.48807969  | -0.03562413 | 6.99773838  |
| O  | 2.75029747  | 5.69460207  | 7.04731012  |
| O  | -2.86376947 | 5.71443276  | 6.97685285  |
| O  | 2.77296080  | -0.01211054 | 4.16329813  |
| O  | 2.81121210  | -5.68386201 | 4.12583064  |
| O  | 2.81861028  | 0.01154391  | 9.87060190  |
| O  | 2.74918160  | -0.05763390 | -1.54400557 |
| O  | -2.91504910 | 0.03573555  | 4.11130222  |
| O  | 8.44471458  | -0.05011690 | 4.20063866  |
| O  | 2.72487417  | 5.67589737  | 4.21542161  |
| O  | -2.98075412 | 5.74136059  | 4.16342930  |
| O  | -2.92181424 | -0.06827831 | -1.54660920 |
| O  | 2.82901175  | 5.68254128  | 9.87333229  |
| O  | 1.30631830  | 2.76914736  | -0.11006818 |
| O  | 1.35844271  | -2.93647774 | -0.17577570 |
| O  | 1.35831982  | 2.81699088  | 5.57794173  |
| O  | 1.41044078  | -2.87101699 | 5.52985254  |
| O  | -4.35159308 | 2.87316366  | -0.11682759 |
| O  | -4.34898388 | 2.86251674  | 5.55416822  |
| O  | 7.06562362  | 2.79333390  | 5.62358565  |
| O  | 7.06835157  | -2.87766350 | 5.63398456  |
| O  | 1.32085480  | 8.48874234  | 5.61619554  |
| O  | 1.39566587  | 2.85499479  | 11.24969553 |
| O  | -0.05623331 | 1.40244110  | 2.74874840  |
| O  | -0.03233033 | -4.30486185 | 2.70297796  |
| O  | -0.00826487 | 1.45431548  | 8.43675910  |
| O  | -0.09436231 | 1.36521789  | -2.92300401 |
| O  | -5.72798576 | 1.43966679  | 2.71062499  |
| O  | 5.63177743  | 1.35056423  | 2.79671122  |
| O  | -0.10200126 | 7.10974407  | 2.77265398  |
| O  | 5.63866602  | -4.30734320 | 2.69245011  |
| O  | 5.69736220  | 1.40243856  | 8.50233830  |
| O  | -0.11252349 | 7.11222297  | 8.44365038  |
| O  | 4.12621298  | 2.78747151  | -0.00826404 |
| O  | 4.17186637  | -2.90955119 | -0.05879375 |
| O  | 4.21374013  | 2.84636405  | 5.64670097  |
| O  | 4.24232931  | -2.88972301 | 5.55527312  |
| O  | -1.52556915 | 2.79451263  | -0.12883544 |

|   |             |             |             |
|---|-------------|-------------|-------------|
| O | -1.49710248 | 2.88568966  | 5.60725901  |
| O | -1.47624559 | 8.53204628  | 5.60164269  |
| O | 4.19276561  | 2.84050067  | 11.29305787 |
| O | -1.45498417 | -2.81955091 | -0.14890472 |
| O | -1.40945710 | -2.76927408 | 5.54811765  |
| O | -0.12505433 | 4.25786154  | 2.71949906  |
| O | -0.08548400 | -1.45297929 | 2.67992612  |
| O | -0.03375135 | 4.28620234  | 8.45559101  |
| O | -0.02646846 | -1.36557905 | 8.33489460  |
| O | -5.77141035 | 4.23676510  | 2.72524378  |
| O | 5.52991412  | 4.17045880  | 2.77850898  |
| O | 5.65060803  | -1.48132262 | 2.77122354  |
| O | 5.58031635  | 4.21586048  | 8.47553357  |
| O | 5.67055614  | -1.41098331 | 8.38529123  |
| O | -0.07974488 | -1.43188042 | -2.96642984 |

**SOD-162**

|    |             |             |            |
|----|-------------|-------------|------------|
| Zn | 16.84075792 | 14.35206585 | 4.06691696 |
| O  | 16.84462115 | 15.45054063 | 2.57810848 |
| O  | 13.98922466 | 16.86371169 | 3.94946974 |
| Zn | 15.49221266 | 16.85413602 | 2.88574080 |
| O  | 19.67055201 | 16.88077918 | 3.98237975 |
| O  | 16.83585374 | 18.24783998 | 2.56580080 |
| Zn | 16.82918622 | 19.34467977 | 4.06972931 |
| Zn | 18.18305382 | 16.85601102 | 2.86361900 |
| Zn | 11.20325697 | 8.71842482  | 9.88662297 |
| O  | 11.17485204 | 9.79651037  | 8.38391877 |
| Zn | 16.85523158 | 8.71831473  | 9.88307897 |
| O  | 16.84730557 | 9.74652921  | 8.38547877 |
| Zn | 22.49929833 | 8.63187598  | 9.79154804 |
| O  | 22.53206310 | 9.70363821  | 8.29025628 |
| O  | 8.38558728  | 11.17588236 | 9.79391246 |
| Zn | 9.88836391  | 11.20444696 | 8.71590441 |
| O  | 14.01045096 | 11.13294193 | 9.72159817 |
| O  | 14.05352338 | 11.20564615 | 6.88204452 |
| O  | 11.19191691 | 12.61537156 | 8.29416323 |
| O  | 15.43356286 | 14.03891075 | 5.38528356 |
| O  | 12.62720881 | 14.00528739 | 5.51110373 |
| Zn | 13.89982653 | 15.47308642 | 5.30112417 |
| Zn | 11.14920228 | 13.99733875 | 9.76473125 |
| Zn | 11.55227449 | 14.02627940 | 7.00090697 |
| Zn | 14.04391581 | 12.72312824 | 5.85638838 |
| Zn | 15.44895610 | 11.10921078 | 8.25445703 |
| Zn | 12.64484721 | 11.06067508 | 8.19881838 |
| O  | 11.19744902 | 15.44420733 | 8.31991342 |
| O  | 19.72824380 | 11.06822352 | 9.66901732 |



|    |             |             |            |
|----|-------------|-------------|------------|
| O  | 19.64730958 | 11.16261876 | 6.84293086 |
| O  | 16.86726266 | 12.57461485 | 8.22103583 |
| O  | 21.07411117 | 13.91328461 | 5.40296169 |
| O  | 18.26430184 | 14.02083624 | 5.36883413 |
| Zn | 19.85367197 | 15.39543677 | 5.20279581 |
| Zn | 16.82875200 | 13.95295741 | 9.66017202 |
| Zn | 16.85231026 | 13.98998065 | 6.83577625 |
| Zn | 19.63285907 | 12.66923025 | 5.80507058 |
| Zn | 21.08961477 | 11.02057915 | 8.13581203 |
| Zn | 18.26916418 | 11.08171195 | 8.22877555 |
| O  | 16.81689562 | 15.40549155 | 8.24726560 |
| O  | 25.35684275 | 11.08905813 | 9.67576175 |
| O  | 22.56320882 | 12.51859826 | 8.19562762 |
| Zn | 22.62948623 | 14.00621341 | 9.64784144 |
| Zn | 22.15982199 | 13.92786815 | 6.90425163 |
| Zn | 23.85306048 | 11.09564746 | 8.57872827 |
| O  | 22.46309384 | 15.33501597 | 8.20488083 |
| O  | 8.38740402  | 16.84812915 | 9.74442228 |
| Zn | 9.88498794  | 16.85613867 | 8.71617874 |
| O  | 14.02327534 | 16.83678604 | 9.67032175 |
| O  | 13.98257466 | 16.87595231 | 6.79452187 |
| O  | 11.17982502 | 18.27388700 | 8.27719811 |
| O  | 15.40618782 | 19.72773284 | 5.35953955 |
| O  | 12.58976312 | 19.71856556 | 5.45966672 |
| Zn | 13.99696367 | 21.01912170 | 5.76304910 |
| Zn | 11.09964233 | 19.73248015 | 9.70639394 |
| Zn | 11.51610384 | 19.68596988 | 6.94929662 |
| Zn | 13.91851280 | 18.27558215 | 5.29311125 |
| Zn | 15.41900824 | 16.86789889 | 8.19975961 |
| Zn | 12.63980694 | 16.86396963 | 8.23831360 |
| O  | 11.13383784 | 21.11513425 | 8.22636381 |
| O  | 19.64534701 | 16.74477404 | 9.64950578 |
| O  | 19.69636231 | 16.79060355 | 6.80823821 |
| O  | 16.85635095 | 18.25386309 | 8.19445743 |
| O  | 18.22115973 | 19.63273803 | 5.39090254 |
| Zn | 16.84272402 | 19.69399511 | 9.65367188 |
| Zn | 16.90411270 | 19.78721055 | 6.83325345 |
| Zn | 19.29276595 | 18.13134779 | 5.42334521 |
| Zn | 20.97337164 | 16.40854340 | 8.23755481 |
| Zn | 18.21624801 | 16.82482682 | 8.19078347 |
| O  | 16.76182177 | 21.07993160 | 8.27564335 |
| O  | 8.29177959  | 22.53265424 | 9.70171789 |
| Zn | 9.79317826  | 22.50008456 | 8.63011269 |
| O  | 13.90364690 | 22.55415854 | 9.65871313 |
| O  | 14.01136803 | 22.52029632 | 6.84893171 |
| O  | 11.04387169 | 23.94097656 | 8.25250097 |
| Zn | 11.06863832 | 25.05965456 | 9.74007166 |

|    |             |             |             |
|----|-------------|-------------|-------------|
| Zn | 15.25528883 | 22.11791454 | 8.29019721  |
| Zn | 12.52913284 | 22.72044675 | 8.06930623  |
| Zn | 16.85273504 | 2.88739344  | 15.48946157 |
| O  | 16.86241390 | 3.95132318  | 13.98662411 |
| O  | 9.79529365  | 8.38646637  | 11.17305020 |
| Zn | 8.71732370  | 9.88927346  | 11.20180449 |
| O  | 14.03775875 | 5.38737555  | 15.43112551 |
| O  | 14.00411568 | 5.51335953  | 12.62484947 |
| O  | 11.20448054 | 6.88431201  | 14.05148025 |
| O  | 15.44324140 | 8.32227327  | 11.19555385 |
| O  | 12.61433237 | 8.29667814  | 11.19004727 |
| Zn | 13.99641548 | 9.76709148  | 11.14737860 |
| Zn | 11.10788577 | 8.25680242  | 15.44686391 |
| Zn | 11.05947987 | 8.20120880  | 12.64297449 |
| Zn | 14.02522097 | 7.00330960  | 11.55017360 |
| Zn | 15.47189615 | 5.30307335  | 13.89739805 |
| Zn | 12.72195382 | 5.85867237  | 14.04165324 |
| O  | 11.13177360 | 9.72395434  | 14.00850603 |
| O  | 19.72642418 | 5.36096977  | 15.40397074 |
| O  | 19.71744363 | 5.46129153  | 12.58749177 |
| O  | 16.87482621 | 6.79638523  | 13.98050068 |
| O  | 21.11421246 | 8.22808262  | 11.13201997 |
| O  | 18.27292439 | 8.27912949  | 11.17792061 |
| Zn | 19.73169222 | 9.70819981  | 11.09794849 |
| Zn | 16.86678737 | 8.20146623  | 15.41717569 |
| Zn | 16.86296732 | 8.24035293  | 12.63792411 |
| Zn | 19.68483796 | 6.95106927  | 11.51402124 |
| Zn | 21.01790711 | 5.76447528  | 13.99477889 |
| Zn | 18.27437224 | 5.29484839  | 13.91623602 |
| O  | 16.83577499 | 9.67217883  | 14.02157537 |
| O  | 22.51912651 | 6.85027288  | 14.00949174 |
| O  | 23.94011036 | 8.25418977  | 11.04234793 |
| Zn | 25.05882871 | 9.74171295  | 11.06742559 |
| Zn | 22.11681521 | 8.29140123  | 15.25362369 |
| Zn | 22.71943430 | 8.07084039  | 12.52746194 |
| O  | 22.55320432 | 9.66004416  | 13.90213452 |
| O  | 8.32123992  | 11.19822214 | 15.44173697 |
| O  | 8.29555310  | 11.19268830 | 12.61287407 |
| O  | 5.51244789  | 12.62787372 | 14.00284476 |
| O  | 9.72328740  | 14.01119675 | 11.13048704 |
| O  | 6.88364003  | 14.05441567 | 11.20338026 |
| Zn | 8.25621010  | 15.44972630 | 11.10699415 |
| Zn | 5.30233672  | 13.90025273 | 15.47080151 |
| Zn | 5.85793905  | 14.04466426 | 12.72082171 |
| Zn | 8.20038771  | 12.64575773 | 11.05814679 |
| Zn | 9.76605404  | 11.14993141 | 13.99489222 |
| Zn | 7.00230344  | 11.55302357 | 14.02377527 |

|    |             |             |             |
|----|-------------|-------------|-------------|
| O  | 5.38671094  | 15.43415078 | 14.03669396 |
| O  | 13.98337012 | 11.08688367 | 15.41219140 |
| O  | 13.99485865 | 11.16018661 | 12.57532526 |
| O  | 11.15933452 | 12.57769629 | 13.99339712 |
| O  | 15.41398255 | 13.98437341 | 11.08485950 |
| O  | 12.57703472 | 13.99573047 | 11.15795527 |
| Zn | 14.00453974 | 15.41408526 | 11.09604818 |
| Zn | 11.09728094 | 14.00511043 | 15.41183215 |
| Zn | 11.11996094 | 13.99053058 | 12.56547877 |
| Zn | 13.98982818 | 12.56778233 | 11.11836838 |
| Zn | 15.41316135 | 11.09806182 | 14.00284699 |
| Zn | 12.56681503 | 11.12059446 | 13.98800871 |
| O  | 11.08628366 | 15.41460940 | 13.98217922 |
| O  | 19.70092445 | 11.05690537 | 15.34835560 |
| O  | 19.67491990 | 11.10745376 | 12.51742209 |
| O  | 16.83723897 | 12.51028779 | 13.93854282 |
| O  | 21.12787786 | 13.94197271 | 11.04725403 |
| O  | 18.25207379 | 13.90111112 | 11.08629391 |
| Zn | 19.68398962 | 15.28465212 | 11.05935582 |
| Zn | 16.80358895 | 13.93434565 | 15.35525289 |
| Zn | 16.82622763 | 13.91982880 | 12.50890868 |
| Zn | 19.72269733 | 12.50545347 | 11.05510498 |
| Zn | 21.08626261 | 11.07202168 | 13.93306462 |
| Zn | 18.26190767 | 11.09550979 | 13.96985098 |
| O  | 16.76412474 | 15.34721055 | 13.92736504 |
| O  | 25.34416546 | 11.08000366 | 12.47304986 |
| O  | 22.53671802 | 12.49078468 | 13.88435012 |
| O  | 23.97292023 | 13.93552325 | 11.05991170 |
| Zn | 22.06549547 | 13.88023842 | 15.20028852 |
| Zn | 22.62105558 | 14.02472904 | 12.45033663 |
| Zn | 25.03670603 | 12.43256321 | 11.06954290 |
| Zn | 23.85517738 | 11.08369563 | 13.57128306 |
| O  | 22.41089328 | 15.29709473 | 13.91830583 |
| O  | 2.57942426  | 16.84506980 | 15.44830746 |
| Zn | 4.06832657  | 16.84119998 | 14.34996450 |
| O  | 8.24865591  | 16.81748588 | 15.40343291 |
| O  | 8.22253517  | 16.86786762 | 12.57253724 |
| O  | 5.37028807  | 18.26482295 | 14.01892519 |
| O  | 9.67060403  | 19.72898671 | 11.06628318 |
| O  | 6.84450535  | 19.64787055 | 11.16078270 |
| Zn | 8.13729778  | 21.09022653 | 11.01869622 |
| Zn | 5.20397916  | 19.85414133 | 15.39348773 |
| Zn | 5.80654720  | 19.63338238 | 12.66732703 |
| Zn | 8.23042642  | 18.26983405 | 11.07971666 |
| Zn | 9.66160553  | 16.82938200 | 13.95094574 |
| Zn | 6.83721992  | 16.85290521 | 13.98787574 |
| O  | 5.40416235  | 21.07458504 | 13.91132807 |

|    |             |             |             |
|----|-------------|-------------|-------------|
| O  | 13.92863221 | 16.76477163 | 15.34540613 |
| O  | 13.94004571 | 16.83798549 | 12.50845437 |
| O  | 11.08769313 | 18.25273277 | 13.89923911 |
| O  | 15.34983562 | 19.70183975 | 11.05554663 |
| O  | 12.51894855 | 19.67574079 | 11.10578360 |
| Zn | 13.93451791 | 21.08715443 | 11.07060094 |
| Zn | 11.06053737 | 19.68461671 | 15.28282977 |
| Zn | 11.05654077 | 19.72341963 | 12.50364098 |
| Zn | 13.97141451 | 18.26277253 | 11.09379791 |
| Zn | 15.35662688 | 16.80428832 | 13.93263374 |
| Zn | 12.51031452 | 16.82690215 | 13.91786959 |
| O  | 11.04845958 | 21.12853646 | 13.94020430 |
| O  | 19.62779505 | 16.73225541 | 15.30809277 |
| O  | 19.60214745 | 16.72684675 | 12.47920187 |
| O  | 16.79156647 | 18.20097308 | 13.91226144 |
| O  | 18.17790142 | 19.53704267 | 11.07549734 |
| Zn | 16.86392149 | 19.72376125 | 15.27788552 |
| Zn | 16.81525642 | 19.66812945 | 12.47383822 |
| Zn | 19.20612208 | 18.03944975 | 11.06724519 |
| Zn | 20.92108215 | 16.37201409 | 13.89724241 |
| Zn | 18.15733286 | 16.77507093 | 13.92603223 |
| O  | 16.71882211 | 21.04057822 | 13.86928796 |
| O  | 8.20594336  | 22.46363944 | 15.33316264 |
| O  | 8.19681568  | 22.56380268 | 12.51671447 |
| O  | 9.67683117  | 25.35756357 | 11.08728602 |
| Zn | 8.57989252  | 23.85369912 | 11.09377997 |
| Zn | 9.64895375  | 22.63006166 | 14.00440625 |
| Zn | 6.90539625  | 22.16037773 | 13.92595943 |
| O  | 13.91925292 | 22.41162430 | 15.29576002 |
| O  | 13.88559785 | 22.53757563 | 12.48943166 |
| O  | 11.06092536 | 23.97360000 | 13.93386762 |
| O  | 12.47412579 | 25.34492918 | 11.07852551 |
| Zn | 11.07047412 | 25.03740416 | 12.43092552 |
| Zn | 13.57246570 | 23.85602980 | 11.08234142 |
| Zn | 15.20138914 | 22.06630410 | 13.87901674 |
| Zn | 12.45144222 | 22.62183435 | 14.02320781 |
| O  | 15.44903030 | 2.57988516  | 16.84177459 |
| Zn | 14.35072934 | 4.06876236  | 16.83805060 |
| O  | 18.24637899 | 2.56704265  | 16.83314342 |
| Zn | 19.34327979 | 4.07094151  | 16.82677507 |
| Zn | 16.85470738 | 2.86497459  | 18.18032254 |
| O  | 16.87909621 | 3.98348957  | 19.66790441 |
| O  | 9.74522020  | 8.38784418  | 16.84512081 |
| Zn | 8.71709394  | 9.88550994  | 16.85370063 |
| O  | 13.91188171 | 5.40432194  | 21.07160626 |
| O  | 14.01945981 | 5.37060560  | 18.26185341 |
| O  | 11.16118391 | 6.84451240  | 19.64492226 |

|    |             |             |             |
|----|-------------|-------------|-------------|
| O  | 15.40426974 | 8.24908086  | 16.81494312 |
| O  | 12.57337286 | 8.22308432  | 16.86512800 |
| Zn | 13.95191098 | 9.66208490  | 16.82681268 |
| Zn | 11.01916307 | 8.13741270  | 21.08715058 |
| Zn | 11.08051160 | 8.23079639  | 18.26688091 |
| Zn | 13.98872004 | 6.83769493  | 16.85026388 |
| Zn | 15.39393676 | 5.20428719  | 19.85087507 |
| Zn | 12.66783741 | 5.80676621  | 19.63030186 |
| O  | 11.06701440 | 9.67078756  | 19.72605370 |
| O  | 19.63135472 | 5.39190396  | 18.21893754 |
| O  | 16.78925124 | 6.80931584  | 19.69406979 |
| O  | 21.07881469 | 8.27673250  | 16.76013246 |
| O  | 18.25273012 | 8.19577800  | 16.85447898 |
| Zn | 19.69294879 | 9.65486453  | 16.84110991 |
| Zn | 16.40715066 | 8.23831582  | 20.97137746 |
| Zn | 16.82363660 | 8.19215143  | 18.21436266 |
| Zn | 19.78592307 | 6.83445757  | 16.90210511 |
| Zn | 18.12991441 | 5.42446372  | 19.29044327 |
| O  | 16.74358218 | 9.65059335  | 19.64358893 |
| O  | 3.95060404  | 13.98957609 | 16.86137231 |
| Zn | 2.88690051  | 15.49258371 | 16.85188674 |
| O  | 8.22717615  | 11.13433765 | 21.11269806 |
| O  | 8.27792965  | 11.18017843 | 18.27141853 |
| O  | 5.46041827  | 12.59018011 | 19.71633651 |
| O  | 9.67146612  | 14.02378623 | 16.83451801 |
| O  | 6.79563718  | 13.98312277 | 16.87381263 |
| Zn | 8.20091535  | 15.41954021 | 16.86577723 |
| Zn | 5.76379419  | 13.99726874 | 21.01696051 |
| Zn | 5.29415245  | 13.91903639 | 18.27334615 |
| Zn | 8.23941871  | 12.64034557 | 16.86163630 |
| Zn | 9.70715857  | 11.09992179 | 19.73001420 |
| Zn | 6.95005844  | 11.51653652 | 19.68363727 |
| O  | 5.36054850  | 15.40661781 | 19.72554414 |
| O  | 13.94078928 | 11.04827188 | 21.12605324 |
| O  | 13.90022329 | 11.08805170 | 18.25027827 |
| O  | 11.10661780 | 12.51914728 | 19.67338877 |
| O  | 15.34652169 | 13.92911709 | 16.76275521 |
| O  | 12.50959933 | 13.94054487 | 16.83583311 |
| Zn | 13.93378481 | 15.35713771 | 16.80233722 |
| Zn | 11.07116235 | 13.93454128 | 21.08495721 |
| Zn | 11.09486133 | 13.97173973 | 18.26054784 |
| Zn | 13.91898717 | 12.51077497 | 16.82459517 |
| Zn | 15.28363864 | 11.06056308 | 19.68237509 |
| Zn | 12.50446081 | 11.05663997 | 19.72083881 |
| O  | 11.05634009 | 15.35002051 | 19.69979350 |
| O  | 19.53603875 | 11.07650611 | 18.17632316 |
| O  | 16.72604878 | 12.48028819 | 19.60064178 |

|    |             |             |             |
|----|-------------|-------------|-------------|
| O  | 21.03978117 | 13.87037897 | 16.71772330 |
| O  | 18.20021677 | 13.91363028 | 16.79021211 |
| Zn | 19.72306649 | 15.27906423 | 16.86272751 |
| Zn | 16.37139524 | 13.89816904 | 20.91970515 |
| Zn | 16.77435085 | 13.92725372 | 18.15596048 |
| Zn | 19.66717244 | 12.47503781 | 16.81391366 |
| Zn | 18.03849244 | 11.06805204 | 19.20467220 |
| O  | 16.73173353 | 15.30915971 | 19.62663638 |
| O  | 2.56685002  | 16.83616061 | 18.24560219 |
| O  | 3.98349064  | 19.67096082 | 16.87876337 |
| Zn | 2.86478286  | 18.18343358 | 16.85384241 |
| Zn | 4.07070193  | 16.82965548 | 19.34255179 |
| O  | 8.27656264  | 16.76218165 | 21.07789972 |
| O  | 8.19540123  | 16.85680893 | 18.25181006 |
| O  | 5.39181736  | 18.22159474 | 19.63080863 |
| O  | 9.65061640  | 19.64589459 | 16.74285379 |
| O  | 6.80935249  | 19.69689144 | 16.78878629 |
| Zn | 8.23861665  | 20.97390980 | 16.40668413 |
| Zn | 5.42440362  | 19.29323787 | 18.12943512 |
| Zn | 8.19190993  | 18.21677818 | 16.82283245 |
| Zn | 9.65458649  | 16.84302145 | 19.69193273 |
| Zn | 6.83418702  | 16.90449315 | 19.78513333 |
| O  | 13.87003201 | 16.71848812 | 21.03878696 |
| O  | 13.91321341 | 16.79198679 | 18.19916076 |
| O  | 11.07647274 | 18.17813069 | 19.53507272 |
| O  | 15.30914503 | 19.62841452 | 16.73086848 |
| O  | 12.48028793 | 19.60271483 | 16.72513210 |
| Zn | 13.89831069 | 20.92172586 | 16.37056859 |
| Zn | 11.06827806 | 19.20652931 | 18.03759699 |
| Zn | 13.92710775 | 18.15788318 | 16.77335237 |
| Zn | 15.27868072 | 16.86393954 | 19.72206837 |
| Zn | 12.47470269 | 16.81535022 | 19.66619301 |
| O  | 19.53792551 | 16.74894050 | 18.12704526 |
| O  | 16.74859196 | 18.12817067 | 19.53695755 |
| O  | 18.12806037 | 19.53836675 | 16.74785560 |
| Zn | 16.72010502 | 19.20638864 | 18.03431747 |
| Zn | 19.20606401 | 18.03558412 | 16.71927475 |
| Zn | 18.03513388 | 16.72028806 | 19.20502501 |
| O  | 9.70237421  | 8.29210802  | 22.52960351 |
| Zn | 8.63062729  | 9.79344208  | 22.49758386 |
| O  | 15.33372785 | 8.20561235  | 22.46107204 |
| O  | 12.51739685 | 8.19675328  | 22.56092562 |
| Zn | 14.00514534 | 9.64894938  | 22.62778271 |
| Zn | 11.09437326 | 8.57996313  | 23.85065194 |
| O  | 11.08783973 | 9.67645920  | 25.35470627 |
| O  | 8.25293928  | 11.04394964 | 23.93858330 |
| O  | 9.65933700  | 13.90382569 | 22.55206397 |

|    |             |             |             |
|----|-------------|-------------|-------------|
| O  | 6.84961813  | 14.01173651 | 22.51820720 |
| Zn | 8.29086585  | 15.25562498 | 22.11584481 |
| Zn | 8.06994139  | 12.52944813 | 22.71828424 |
| Zn | 9.74060236  | 11.06837020 | 25.05717056 |
| O  | 13.93470376 | 11.06078673 | 23.97146554 |
| O  | 11.07915005 | 12.47370409 | 25.34260922 |
| O  | 15.29653380 | 13.91881736 | 22.40954952 |
| O  | 12.49003197 | 13.88521567 | 22.53532167 |
| Zn | 13.87970183 | 15.20089639 | 22.06414971 |
| Zn | 11.08293894 | 13.57230149 | 23.85382108 |
| Zn | 14.02384863 | 12.45110842 | 22.61950945 |
| Zn | 12.43153429 | 11.07029720 | 25.03489020 |
| Zn | 13.92604890 | 6.90541662  | 22.15761100 |

**SOD-336**

|    |             |             |            |
|----|-------------|-------------|------------|
| Zn | 22.43350259 | 19.96848239 | 9.69615108 |
| O  | 22.42321839 | 21.04637816 | 8.20759641 |
| Zn | 28.08277885 | 19.93751227 | 9.65719328 |
| O  | 28.13076142 | 21.01310533 | 8.16839974 |
| O  | 19.61524980 | 22.46170015 | 9.56609400 |
| Zn | 21.13805247 | 22.46240183 | 8.54695081 |
| O  | 25.28837273 | 22.40428865 | 9.50114568 |
| O  | 25.28360004 | 22.41728137 | 6.65427305 |
| O  | 22.45464311 | 23.85412008 | 8.08131216 |
| O  | 26.67491997 | 25.26779940 | 5.28698486 |
| O  | 23.87824431 | 25.27752472 | 5.28452134 |
| Zn | 25.28187542 | 26.61396658 | 5.58517621 |
| Zn | 22.41539807 | 25.26975506 | 9.53433644 |
| Zn | 22.77432808 | 25.26602992 | 6.76923387 |
| Zn | 25.27943102 | 23.92331125 | 5.59491780 |
| Zn | 26.69032947 | 22.34420962 | 8.00228859 |
| Zn | 23.88968538 | 22.32040507 | 8.00240880 |
| O  | 22.44637221 | 26.68842853 | 8.07472707 |
| O  | 30.93162656 | 22.43496382 | 9.56769672 |
| O  | 28.14322524 | 23.83285986 | 8.08309790 |
| Zn | 28.20808346 | 25.32945768 | 9.55964874 |
| Zn | 27.76615783 | 25.25772572 | 6.79452056 |
| Zn | 29.43045852 | 22.41817444 | 8.48067138 |
| O  | 28.05615610 | 26.64787914 | 8.11793953 |
| O  | 19.57828787 | 28.06032881 | 9.54149271 |
| Zn | 21.09325452 | 28.05487804 | 8.51492826 |
| O  | 25.21463270 | 28.12460344 | 9.53557637 |
| O  | 25.30796051 | 28.09826901 | 6.70733793 |
| O  | 22.34089301 | 29.49882331 | 8.13299456 |
| Zn | 22.36140192 | 30.57196025 | 9.64286067 |
| Zn | 26.55583364 | 27.72045439 | 8.15129735 |

|    |             |             |             |
|----|-------------|-------------|-------------|
| Zn | 23.82157947 | 28.27796744 | 7.92663657  |
| Zn | 16.77712399 | 14.28879909 | 15.46347862 |
| O  | 16.74882434 | 15.36617366 | 13.96039455 |
| Zn | 22.42847380 | 14.30421870 | 15.45128383 |
| O  | 22.43240357 | 15.32679156 | 13.94833400 |
| Zn | 28.08221282 | 14.25740664 | 15.40657592 |
| O  | 28.06959952 | 15.28228306 | 13.90527602 |
| Zn | 33.73395465 | 14.16479582 | 15.32942521 |
| O  | 33.76731004 | 15.23737790 | 13.82910929 |
| O  | 13.96039486 | 16.74882436 | 15.36617331 |
| Zn | 15.46347895 | 16.77712412 | 14.28879876 |
| O  | 19.58076521 | 16.70081115 | 15.29575861 |
| O  | 19.63173590 | 16.77733982 | 12.45706024 |
| O  | 16.76704005 | 18.18551477 | 13.85967704 |
| O  | 21.02097308 | 19.61540793 | 10.99025582 |
| O  | 18.21008143 | 19.58472038 | 11.08742062 |
| Zn | 19.48083783 | 21.05450174 | 10.88905953 |
| Zn | 16.72099125 | 19.56174454 | 15.33518379 |
| Zn | 17.12695626 | 19.60536572 | 12.57315429 |
| Zn | 19.61955779 | 18.29907330 | 11.43833171 |
| Zn | 21.02267872 | 16.68016605 | 13.83567384 |
| Zn | 18.21911764 | 16.62920170 | 13.76959557 |
| O  | 16.75922255 | 21.01508359 | 13.89626730 |
| O  | 25.26606992 | 16.69261454 | 15.26640116 |
| O  | 25.24948912 | 16.78747322 | 12.44116257 |
| O  | 22.42798401 | 18.15486089 | 13.83051105 |
| O  | 26.67060068 | 19.59089696 | 10.98102474 |
| O  | 23.85096309 | 19.60929753 | 11.01447604 |
| Zn | 25.26788292 | 21.05496928 | 10.94053783 |
| Zn | 22.40882353 | 19.54464820 | 15.26336616 |
| Zn | 22.40366732 | 19.56801508 | 12.45738018 |
| Zn | 25.25619928 | 18.29084753 | 11.41700367 |
| Zn | 26.67220437 | 16.64867456 | 13.77955904 |
| Zn | 23.84353362 | 16.67777726 | 13.79989447 |
| O  | 22.41500100 | 20.99373741 | 13.85150879 |
| O  | 30.96432751 | 16.60814298 | 15.20868160 |
| O  | 30.88136973 | 16.69508252 | 12.38485638 |
| O  | 28.10742998 | 18.10427837 | 13.78203081 |
| O  | 32.31756513 | 19.45029275 | 10.95362467 |
| O  | 29.50524352 | 19.56664503 | 10.94320012 |
| Zn | 31.10520151 | 20.94262757 | 10.78005263 |
| Zn | 28.07927400 | 19.48297676 | 15.22117987 |
| Zn | 28.12416700 | 19.52530385 | 12.41654531 |
| Zn | 30.88010629 | 18.20665012 | 11.35471951 |
| Zn | 32.32560852 | 16.55580211 | 13.67717713 |
| Zn | 29.50217100 | 16.60980646 | 13.77095608 |
| O  | 28.06630741 | 20.94262655 | 13.81894509 |



|    |             |             |             |
|----|-------------|-------------|-------------|
| O  | 36.59826640 | 16.61745540 | 15.21034499 |
| O  | 33.80216103 | 18.05239708 | 13.74203429 |
| Zn | 33.88296876 | 19.54104860 | 15.19492389 |
| Zn | 33.40458659 | 19.46707895 | 12.45479584 |
| Zn | 35.09073072 | 16.62752428 | 14.11910638 |
| O  | 33.71685593 | 20.87214943 | 13.75449067 |
| O  | 13.94833424 | 22.43240351 | 15.32679137 |
| Zn | 15.45128402 | 22.42847391 | 14.30421843 |
| O  | 19.59520445 | 22.39994143 | 15.27114350 |
| O  | 19.56372370 | 22.42507196 | 12.40676725 |
| O  | 16.76316428 | 23.84144322 | 13.89476907 |
| O  | 20.99727682 | 25.27342899 | 10.91606968 |
| O  | 18.16546625 | 25.25452661 | 11.07363135 |
| Zn | 19.50462113 | 26.67289168 | 10.91836098 |
| Zn | 16.68512257 | 25.26376607 | 15.33729681 |
| Zn | 17.14605830 | 25.25504239 | 12.57807554 |
| Zn | 19.52894717 | 23.85842769 | 10.93604290 |
| Zn | 20.99420977 | 22.40336375 | 13.80713826 |
| Zn | 18.21264228 | 22.42523561 | 13.83635180 |
| O  | 16.73204201 | 26.67274703 | 13.88098364 |
| O  | 25.24330516 | 22.35701983 | 15.21703339 |
| O  | 25.25045148 | 22.44053025 | 12.37213471 |
| O  | 22.40550922 | 23.82767702 | 13.78118249 |
| O  | 26.67657695 | 25.27711113 | 10.92092930 |
| O  | 23.82903976 | 25.24014097 | 10.94709685 |
| Zn | 25.24971232 | 26.63854460 | 10.91102651 |
| Zn | 22.35211762 | 25.23131614 | 15.21054655 |
| Zn | 22.37424975 | 25.24029564 | 12.35744438 |
| Zn | 25.28937622 | 23.83930218 | 10.90768576 |
| Zn | 26.66407642 | 22.40228079 | 13.80598073 |
| Zn | 23.83042100 | 22.41721747 | 13.79790161 |
| O  | 22.33754013 | 26.65297136 | 13.78991717 |
| O  | 30.90422826 | 22.29436530 | 15.21465264 |
| O  | 30.94204984 | 22.31860374 | 12.38001537 |
| O  | 28.10322547 | 23.78097991 | 13.77782966 |
| O  | 29.50040265 | 25.19017873 | 11.00389294 |
| Zn | 28.10569197 | 25.23657878 | 15.21305420 |
| Zn | 28.11430984 | 25.27545291 | 12.38308960 |
| Zn | 30.53053788 | 23.67860886 | 11.00515323 |
| Zn | 32.22806239 | 21.94774120 | 13.80247417 |
| Zn | 29.46871034 | 22.35994889 | 13.76109554 |
| O  | 27.97997851 | 26.60297471 | 13.81566077 |
| O  | 13.90527638 | 28.06959941 | 15.28228312 |
| Zn | 15.40657619 | 28.08221292 | 14.25740658 |
| O  | 19.54771779 | 28.09533699 | 15.23228712 |
| O  | 19.51225221 | 28.11953335 | 12.36941935 |
| O  | 16.69670091 | 29.50629237 | 13.82426724 |

|    |             |             |             |
|----|-------------|-------------|-------------|
| O  | 20.94262679 | 30.95539247 | 10.92986235 |
| O  | 18.12422737 | 30.93721689 | 11.00328465 |
| Zn | 19.52385095 | 32.24239408 | 11.31329389 |
| Zn | 16.63555101 | 30.97422759 | 15.24671249 |
| Zn | 17.04546784 | 30.90990793 | 12.49046222 |
| Zn | 19.45136868 | 29.49133202 | 10.85052022 |
| Zn | 20.94262618 | 28.12192341 | 13.76333079 |
| Zn | 18.16415914 | 28.10579671 | 13.79983751 |
| O  | 16.67063284 | 32.34967374 | 13.76064781 |
| O  | 25.15321223 | 28.00427686 | 15.21250813 |
| O  | 25.18855865 | 28.06099556 | 12.37896267 |
| O  | 22.37300136 | 29.51583650 | 13.76571982 |
| O  | 23.76102639 | 30.88196484 | 10.94803611 |
| Zn | 22.38062885 | 30.96688409 | 15.21235826 |
| Zn | 22.43388632 | 31.03473593 | 12.39392068 |
| Zn | 24.83979485 | 29.39479332 | 10.97534185 |
| Zn | 26.47868165 | 27.62785331 | 13.80304309 |
| Zn | 23.72109998 | 28.08542086 | 13.77945352 |
| O  | 22.30696894 | 32.34376491 | 13.82492219 |
| O  | 13.82910955 | 33.76730988 | 15.23737776 |
| Zn | 15.32942539 | 33.73395460 | 14.16479561 |
| O  | 19.43888558 | 33.81052211 | 15.19683054 |
| O  | 19.54436392 | 33.75226041 | 12.38643076 |
| O  | 16.57729892 | 35.17791443 | 13.78698360 |
| Zn | 16.60338765 | 36.30007919 | 15.27128769 |
| Zn | 20.79200263 | 33.37032714 | 13.83038134 |
| Zn | 18.06367662 | 33.95861507 | 13.60728237 |
| Zn | 22.46240130 | 8.54695160  | 21.13805218 |
| O  | 22.46170008 | 9.56609460  | 19.61524942 |
| Zn | 28.05487771 | 8.51492953  | 21.09325464 |
| O  | 28.06032883 | 9.54149347  | 19.57828770 |
| O  | 15.36617353 | 13.96039486 | 16.74882398 |
| Zn | 14.28879898 | 15.46347894 | 16.77712374 |
| O  | 19.61540773 | 10.99025631 | 21.02097278 |
| O  | 19.58472026 | 11.08742099 | 18.21008112 |
| O  | 16.77733958 | 12.45706051 | 19.63173557 |
| O  | 21.01508348 | 13.89626764 | 16.75922236 |
| O  | 18.18551461 | 13.85967736 | 16.76703975 |
| Zn | 19.56174439 | 15.33518410 | 16.72099109 |
| Zn | 16.68016580 | 13.83567405 | 21.02267847 |
| Zn | 16.62920152 | 13.76959586 | 18.21911732 |
| Zn | 19.60536557 | 12.57315462 | 17.12695591 |
| Zn | 21.05450164 | 10.88906009 | 19.48083749 |
| Zn | 18.29907312 | 11.43833208 | 19.61955744 |
| O  | 16.70081092 | 15.29575880 | 19.58076497 |
| O  | 25.27342897 | 10.91607072 | 20.99727670 |
| O  | 25.25452657 | 11.07363179 | 18.16546618 |

|    |             |             |             |
|----|-------------|-------------|-------------|
| O  | 22.42507181 | 12.40676777 | 19.56372366 |
| O  | 26.67274693 | 13.88098388 | 16.73204175 |
| O  | 23.84144307 | 13.89476937 | 16.76316412 |
| Zn | 25.26376598 | 15.33729703 | 16.68512235 |
| Zn | 22.40336353 | 13.80713876 | 20.99420977 |
| Zn | 22.42523544 | 13.83635223 | 18.21264214 |
| Zn | 25.25504221 | 12.57807584 | 17.14605805 |
| Zn | 26.67289175 | 10.91836174 | 19.50462094 |
| Zn | 23.85842765 | 10.93604354 | 19.52894716 |
| O  | 22.39994116 | 15.27114388 | 19.59520434 |
| O  | 30.95539308 | 10.92986204 | 20.94262657 |
| O  | 30.93721719 | 11.00328501 | 18.12422726 |
| O  | 28.11953364 | 12.36941980 | 19.51225208 |
| O  | 32.34967362 | 13.76064843 | 16.67063262 |
| O  | 29.50629223 | 13.82426747 | 16.69670074 |
| Zn | 30.97422703 | 15.24671293 | 16.63555075 |
| Zn | 28.12192319 | 13.76333118 | 20.94262605 |
| Zn | 28.10579656 | 13.79983786 | 18.16415895 |
| Zn | 30.90990802 | 12.49046272 | 17.04546794 |
| Zn | 32.24239483 | 11.31329348 | 19.52385069 |
| Zn | 29.49133237 | 10.85052060 | 19.45136861 |
| O  | 28.09533651 | 15.23228746 | 19.54771762 |
| O  | 33.75226023 | 12.38643162 | 19.54436381 |
| O  | 35.17791454 | 13.78698395 | 16.57729871 |
| Zn | 36.30007957 | 15.27128795 | 16.60338716 |
| Zn | 33.37032587 | 13.83038245 | 20.79200206 |
| Zn | 33.95861503 | 13.60728294 | 18.06367634 |
| O  | 33.81052135 | 15.19683119 | 19.43888495 |
| O  | 13.89626739 | 16.75922244 | 21.01508344 |
| O  | 13.85967720 | 16.76703996 | 18.18551447 |
| O  | 11.08742075 | 18.21008114 | 19.58472013 |
| O  | 15.29575878 | 19.58076518 | 16.70081088 |
| O  | 12.45706039 | 19.63173580 | 16.77733957 |
| Zn | 13.83567399 | 21.02267864 | 16.68016582 |
| Zn | 10.88905977 | 19.48083742 | 21.05450162 |
| Zn | 11.43833191 | 19.61955750 | 18.29907308 |
| Zn | 13.76959578 | 18.21911759 | 16.62920140 |
| Zn | 15.33518386 | 16.72099126 | 19.56174433 |
| Zn | 12.57315443 | 17.12695599 | 19.60536546 |
| O  | 10.99025610 | 21.02097273 | 19.61540783 |
| O  | 19.55484823 | 16.68045978 | 20.98354788 |
| O  | 19.56061223 | 16.72859642 | 18.14723902 |
| O  | 16.72859620 | 18.14723918 | 19.56061232 |
| O  | 20.98354785 | 19.55484852 | 16.68045947 |
| O  | 18.14723909 | 19.56061246 | 16.72859621 |
| Zn | 19.57292638 | 20.97796456 | 16.69328636 |
| Zn | 16.69328643 | 19.57292642 | 20.97796449 |

|    |             |             |             |
|----|-------------|-------------|-------------|
| Zn | 16.69257791 | 19.56450528 | 18.13590613 |
| Zn | 19.56450521 | 18.13590631 | 16.69257780 |
| Zn | 20.97796425 | 16.69328669 | 19.57292637 |
| Zn | 18.13590607 | 16.69257800 | 19.56450516 |
| O  | 16.68045964 | 20.98354787 | 19.55484839 |
| O  | 25.24880370 | 16.63645076 | 20.94262594 |
| O  | 25.24466779 | 16.71780362 | 18.12210342 |
| O  | 22.40016423 | 18.10543822 | 19.52359400 |
| O  | 26.66822319 | 19.52823631 | 16.64195283 |
| O  | 23.82007874 | 19.53056827 | 16.68743458 |
| Zn | 25.24282074 | 20.94262641 | 16.64243794 |
| Zn | 22.36102082 | 19.52423008 | 20.94262905 |
| Zn | 22.39938474 | 19.52562714 | 18.10321138 |
| Zn | 25.24187357 | 18.11911894 | 16.66146959 |
| Zn | 26.67470696 | 16.65394086 | 19.53313306 |
| Zn | 23.82181809 | 16.69169346 | 19.53697006 |
| O  | 22.36057384 | 20.94262745 | 19.52468297 |
| O  | 30.96917959 | 16.61182674 | 20.88797469 |
| O  | 30.93814993 | 16.64512405 | 18.05621761 |
| O  | 28.10406902 | 18.05757974 | 19.47974412 |
| O  | 32.38410705 | 19.48096986 | 16.59687419 |
| O  | 29.51311622 | 19.44472617 | 16.63480489 |
| Zn | 30.94471757 | 20.83028960 | 16.61737314 |
| Zn | 28.07812246 | 19.48189245 | 20.89104294 |
| Zn | 28.08735545 | 19.46804005 | 18.05483512 |
| Zn | 30.97756432 | 18.04596111 | 16.59587844 |
| Zn | 32.35091423 | 16.61550519 | 19.46985487 |
| Zn | 29.52780430 | 16.64496323 | 19.51100054 |
| O  | 28.03374972 | 20.89151710 | 19.47025427 |
| O  | 36.60073365 | 16.60773090 | 18.00702029 |
| O  | 33.80393723 | 18.03113934 | 19.43060361 |
| O  | 35.23098225 | 19.46798046 | 16.60165522 |
| Zn | 33.33831255 | 19.42285777 | 20.74720245 |
| Zn | 33.88283770 | 19.56484966 | 17.99556766 |
| Zn | 36.29033129 | 17.96194568 | 16.60583079 |
| Zn | 35.11601594 | 16.61922268 | 19.11092917 |
| O  | 33.67766860 | 20.83888169 | 19.46203628 |
| O  | 8.20759677  | 22.42321792 | 21.04637827 |
| Zn | 9.69615136  | 22.43350218 | 19.96848239 |
| O  | 13.85150900 | 22.41500086 | 20.99373739 |
| O  | 13.83051124 | 22.42798386 | 18.15486076 |
| O  | 11.01447628 | 23.85096278 | 19.60929760 |
| O  | 15.26640143 | 25.26606979 | 16.69261438 |
| O  | 12.44116282 | 25.24948900 | 16.78747323 |
| Zn | 13.77955931 | 26.67220424 | 16.64867455 |
| Zn | 10.94053822 | 25.26788252 | 21.05496947 |
| Zn | 11.41700410 | 25.25619888 | 18.29084765 |

|    |             |             |             |
|----|-------------|-------------|-------------|
| Zn | 13.79989474 | 23.84353351 | 16.67777712 |
| Zn | 15.26336633 | 22.40882354 | 19.54464809 |
| Zn | 12.45738043 | 22.40366698 | 19.56801502 |
| O  | 10.98102541 | 26.67060035 | 19.59089721 |
| O  | 19.52468299 | 22.36057397 | 20.94262733 |
| O  | 19.52359401 | 22.40016456 | 18.10543791 |
| O  | 16.68743466 | 23.82007884 | 19.53056814 |
| O  | 20.94262601 | 25.24880407 | 16.63645026 |
| O  | 18.12210360 | 25.24466815 | 16.71780343 |
| Zn | 19.53313319 | 26.67470740 | 16.65394051 |
| Zn | 16.64243814 | 25.24282080 | 20.94262634 |
| Zn | 16.66146983 | 25.24187368 | 18.11911881 |
| Zn | 19.53697019 | 23.82181841 | 16.69169308 |
| Zn | 20.94262899 | 22.36102110 | 19.52422987 |
| Zn | 18.10321146 | 22.39938485 | 19.52562695 |
| O  | 16.64195326 | 26.66822328 | 19.52823624 |
| O  | 25.20480265 | 22.33040524 | 20.90170741 |
| O  | 25.19782460 | 22.35468471 | 18.06517883 |
| O  | 22.36166115 | 23.77981695 | 19.48508671 |
| O  | 26.61885175 | 25.19264310 | 16.61919415 |
| O  | 23.76315205 | 25.16745472 | 16.64058770 |
| Zn | 25.20013289 | 26.54796087 | 16.62148897 |
| Zn | 22.31232335 | 25.19197170 | 20.90728810 |
| Zn | 22.34828062 | 25.19356545 | 18.06343545 |
| Zn | 25.22378613 | 23.76613811 | 16.64338681 |
| Zn | 26.62189716 | 22.34060882 | 19.47642968 |
| Zn | 23.78204769 | 22.35962749 | 19.48587025 |
| O  | 22.29004621 | 26.61411685 | 19.48530907 |
| O  | 30.89500559 | 22.26984161 | 20.86427671 |
| O  | 30.87078788 | 22.27596541 | 18.03428962 |
| O  | 28.05475198 | 23.73039516 | 19.45726922 |
| O  | 29.44409402 | 25.09779065 | 16.63576563 |
| Zn | 28.04958193 | 25.20509226 | 20.86257967 |
| Zn | 28.08536856 | 25.20748605 | 18.04172783 |
| Zn | 30.46825672 | 23.59441670 | 16.62905795 |
| Zn | 32.18911449 | 21.91677733 | 19.45175281 |
| Zn | 29.42788131 | 22.31723764 | 19.48158345 |
| O  | 27.93692024 | 26.55846548 | 19.45285793 |
| O  | 8.16840034  | 28.13076096 | 21.01310567 |
| Zn | 9.65719395  | 28.08277835 | 19.93751269 |
| O  | 13.81894560 | 28.06630738 | 20.94262667 |
| O  | 13.78203123 | 28.10742980 | 18.10427843 |
| O  | 10.94320052 | 29.50524332 | 19.56664538 |
| O  | 15.20868200 | 30.96432750 | 16.60814268 |
| O  | 12.38485682 | 30.88136949 | 16.69508286 |
| Zn | 13.67717739 | 32.32560832 | 16.55580197 |
| Zn | 10.78005244 | 31.10520179 | 20.94262779 |

|    |             |             |             |
|----|-------------|-------------|-------------|
| Zn | 11.35471982 | 30.88010594 | 18.20665040 |
| Zn | 13.77095664 | 29.50217084 | 16.60980664 |
| Zn | 15.22118031 | 28.07927408 | 19.48297680 |
| Zn | 12.41654579 | 28.12416685 | 19.52530400 |
| O  | 10.95362501 | 32.31756503 | 19.45029287 |
| O  | 19.47025448 | 28.03374990 | 20.89151693 |
| O  | 19.47974434 | 28.10406949 | 18.05757940 |
| O  | 16.63480519 | 29.51311648 | 19.44472584 |
| O  | 20.88797494 | 30.96918016 | 16.61182671 |
| O  | 18.05621797 | 30.93815067 | 16.64512356 |
| Zn | 19.46985530 | 32.35091500 | 16.61550467 |
| Zn | 16.61737333 | 30.94471786 | 20.83028929 |
| Zn | 16.59587891 | 30.97756463 | 18.04596079 |
| Zn | 19.51100077 | 29.52780487 | 16.64496289 |
| Zn | 20.89104310 | 28.07812282 | 19.48189223 |
| Zn | 18.05483541 | 28.08735567 | 19.46803981 |
| O  | 16.59687477 | 32.38410739 | 19.48096954 |
| O  | 25.12603081 | 27.98898339 | 20.87017271 |
| O  | 25.12209096 | 27.99049499 | 18.04381096 |
| O  | 22.32153341 | 29.47849417 | 19.46018109 |
| O  | 23.71978843 | 30.81163108 | 16.63072304 |
| Zn | 22.40443130 | 30.99619959 | 20.83074411 |
| Zn | 22.35630305 | 30.94921941 | 18.02682275 |
| Zn | 24.73919224 | 29.30718344 | 16.63021408 |
| Zn | 26.43397504 | 27.58104612 | 19.45677776 |
| Zn | 23.67261336 | 28.04890186 | 19.46001874 |
| O  | 22.27000745 | 32.31917183 | 19.42355556 |
| O  | 13.75449115 | 33.71685595 | 20.87214927 |
| O  | 13.74203475 | 33.80216080 | 18.05239693 |
| O  | 15.21034552 | 36.59826596 | 16.61745513 |
| Zn | 14.11910665 | 35.09073057 | 16.62752419 |
| Zn | 15.19492431 | 33.88296911 | 19.54104845 |
| Zn | 12.45479643 | 33.40458619 | 19.46707879 |
| O  | 19.46203655 | 33.67766877 | 20.83888124 |
| O  | 19.43060412 | 33.80393803 | 18.03113879 |
| O  | 16.60165550 | 35.23098270 | 19.46798011 |
| O  | 18.00702067 | 36.60073418 | 16.60773047 |
| Zn | 16.60583148 | 36.29033186 | 17.96194542 |
| Zn | 19.11092992 | 35.11601674 | 16.61922193 |
| Zn | 20.74720280 | 33.33831296 | 19.42285728 |
| Zn | 17.99556802 | 33.88283825 | 19.56484914 |
| O  | 21.04637786 | 8.20759693  | 22.42321814 |
| Zn | 19.96848198 | 9.69615153  | 22.43350228 |
| O  | 25.26779937 | 5.28698506  | 26.67491941 |
| O  | 25.27752447 | 5.28452252  | 23.87824367 |
| O  | 22.41728124 | 6.65427390  | 25.28359963 |
| O  | 26.68842834 | 8.07472842  | 22.44637236 |

|    |             |             |             |
|----|-------------|-------------|-------------|
| O  | 23.85411974 | 8.08131363  | 22.45464294 |
| Zn | 25.26975489 | 9.53433764  | 22.41539806 |
| Zn | 22.34420970 | 8.00228899  | 26.69032944 |
| Zn | 22.32040485 | 8.00241000  | 23.88968522 |
| Zn | 25.26602934 | 6.76923539  | 22.77432794 |
| Zn | 26.61396636 | 5.58517719  | 25.28187471 |
| Zn | 23.92331112 | 5.59491867  | 25.27943077 |
| O  | 22.40428852 | 9.50114635  | 25.28837281 |
| O  | 28.09826906 | 6.70733851  | 25.30796014 |
| O  | 29.49882313 | 8.13299489  | 22.34089274 |
| Zn | 30.57196124 | 9.64286017  | 22.36140180 |
| Zn | 27.72045466 | 8.15129778  | 26.55583341 |
| Zn | 28.27796734 | 7.92663747  | 23.82157931 |
| O  | 28.12460340 | 9.53557698  | 25.21463255 |
| O  | 15.32679135 | 13.94833414 | 22.43240336 |
| Zn | 14.30421844 | 15.45128394 | 22.42847381 |
| O  | 19.59089689 | 10.98102544 | 26.67060047 |
| O  | 19.60929737 | 11.01447646 | 23.85096289 |
| O  | 16.78747296 | 12.44116282 | 25.24948896 |
| O  | 20.99373723 | 13.85150919 | 22.41500107 |
| O  | 18.15486063 | 13.83051138 | 22.42798379 |
| Zn | 19.54464792 | 15.26336649 | 22.40882359 |
| Zn | 16.64867448 | 13.77955931 | 26.67220423 |
| Zn | 16.67777704 | 13.79989472 | 23.84353344 |
| Zn | 19.56801492 | 12.45738060 | 22.40366709 |
| Zn | 21.05496916 | 10.94053847 | 25.26788268 |
| Zn | 18.29084736 | 11.41700408 | 25.25619906 |
| O  | 16.69261438 | 15.26640135 | 25.26606976 |
| O  | 25.27711102 | 10.92092939 | 26.67657716 |
| O  | 25.24014076 | 10.94709784 | 23.82903989 |
| O  | 22.44053013 | 12.37213526 | 25.25045160 |
| O  | 26.65297116 | 13.78991795 | 22.33754001 |
| O  | 23.82767673 | 13.78118317 | 22.40550927 |
| Zn | 25.23131587 | 15.21054718 | 22.35211762 |
| Zn | 22.40228090 | 13.80598105 | 26.66407677 |
| Zn | 22.41721726 | 13.79790214 | 23.83042112 |
| Zn | 25.24029544 | 12.35744523 | 22.37424979 |
| Zn | 26.63854438 | 10.91102692 | 25.24971243 |
| Zn | 23.83930208 | 10.90768638 | 25.28937645 |
| O  | 22.35701969 | 15.21703369 | 25.24330549 |
| O  | 30.88196473 | 10.94803617 | 23.76102606 |
| O  | 28.06099510 | 12.37896323 | 25.18855852 |
| O  | 32.34376445 | 13.82492246 | 22.30696883 |
| O  | 29.51583622 | 13.76571969 | 22.37300129 |
| Zn | 30.96688352 | 15.21235834 | 22.38062885 |
| Zn | 27.62785319 | 13.80304344 | 26.47868180 |
| Zn | 28.08542056 | 13.77945402 | 23.72109989 |

|    |             |             |             |
|----|-------------|-------------|-------------|
| Zn | 31.03473586 | 12.39392060 | 22.43388589 |
| Zn | 29.39479282 | 10.97534289 | 24.83979396 |
| O  | 28.00427672 | 15.21250842 | 25.15321233 |
| O  | 9.56609427  | 19.61524915 | 22.46170010 |
| Zn | 8.54695120  | 21.13805189 | 22.46240176 |
| O  | 13.88098375 | 16.73204186 | 26.67274720 |
| O  | 13.89476916 | 16.76316415 | 23.84144322 |
| O  | 11.07363147 | 18.16546600 | 25.25452673 |
| O  | 15.27114363 | 19.59520429 | 22.39994144 |
| O  | 12.40676743 | 19.56372353 | 22.42507187 |
| Zn | 13.80713842 | 20.99420962 | 22.40336375 |
| Zn | 10.91836116 | 19.50462091 | 26.67289182 |
| Zn | 10.93604317 | 19.52894685 | 23.85842770 |
| Zn | 13.83635197 | 18.21264212 | 22.42523553 |
| Zn | 15.33729684 | 16.68512249 | 25.26376613 |
| Zn | 12.57807568 | 17.14605808 | 25.25504248 |
| O  | 10.91607015 | 20.99727646 | 25.27342902 |
| O  | 19.52823617 | 16.64195320 | 26.66822349 |
| O  | 19.53056812 | 16.68743480 | 23.82007894 |
| O  | 16.71780348 | 18.12210352 | 25.24466826 |
| O  | 20.94262721 | 19.52468313 | 22.36057397 |
| O  | 18.10543790 | 19.52359412 | 22.40016455 |
| Zn | 19.52422979 | 20.94262913 | 22.36102105 |
| Zn | 16.65394057 | 19.53313303 | 26.67470760 |
| Zn | 16.69169316 | 19.53697012 | 23.82181849 |
| Zn | 19.52562690 | 18.10321156 | 22.39938489 |
| Zn | 20.94262623 | 16.64243818 | 25.24282099 |
| Zn | 18.11911880 | 16.66146975 | 25.24187383 |
| O  | 16.63645042 | 20.94262586 | 25.24880423 |
| O  | 25.19264297 | 16.61919399 | 26.61885197 |
| O  | 25.16745451 | 16.64058816 | 23.76315219 |
| O  | 22.35468453 | 18.06517903 | 25.19782481 |
| O  | 26.61411661 | 19.48530934 | 22.29004616 |
| O  | 23.77981661 | 19.48508700 | 22.36166126 |
| Zn | 25.19197144 | 20.90728831 | 22.31232339 |
| Zn | 22.34060857 | 19.47642975 | 26.62189750 |
| Zn | 22.35962723 | 19.48587042 | 23.78204788 |
| Zn | 25.19356516 | 18.06343582 | 22.34828067 |
| Zn | 26.54796066 | 16.62148912 | 25.20013303 |
| Zn | 23.76613796 | 16.64338708 | 25.22378634 |
| O  | 22.33040498 | 20.90170744 | 25.20480296 |
| O  | 30.81163075 | 16.63072323 | 23.71978824 |
| O  | 27.99049476 | 18.04381111 | 25.12209097 |
| O  | 32.31917150 | 19.42355559 | 22.27000713 |
| O  | 29.47849381 | 19.46018114 | 22.32153326 |
| Zn | 30.99619926 | 20.83074410 | 22.40443119 |
| Zn | 27.58104586 | 19.45677778 | 26.43397514 |



|    |             |             |             |
|----|-------------|-------------|-------------|
| Zn | 28.04890160 | 19.46001881 | 23.67261332 |
| Zn | 30.94921904 | 18.02682281 | 22.35630270 |
| Zn | 29.30718326 | 16.63021436 | 24.73919225 |
| O  | 27.98898316 | 20.87017266 | 25.12603089 |
| O  | 8.07472768  | 22.44637173 | 26.68842894 |
| O  | 8.08131284  | 22.45464247 | 23.85412024 |
| O  | 5.28452199  | 23.87824331 | 25.27752485 |
| O  | 9.50114604  | 25.28837227 | 22.40428884 |
| O  | 6.65427348  | 25.28359939 | 22.41728157 |
| Zn | 8.00228867  | 26.69032906 | 22.34420985 |
| Zn | 5.58517756  | 25.28187424 | 26.61396657 |
| Zn | 5.59491811  | 25.27943010 | 23.92331134 |
| Zn | 8.00240947  | 23.88968490 | 22.32040535 |
| Zn | 9.53433687  | 22.41539764 | 25.26975541 |
| Zn | 6.76923459  | 22.77432720 | 25.26603003 |
| O  | 5.28698549  | 26.67491891 | 25.26779959 |
| O  | 13.78991747 | 22.33753983 | 26.65297149 |
| O  | 13.78118273 | 22.40550905 | 23.82767705 |
| O  | 10.94709711 | 23.82903954 | 25.24014127 |
| O  | 15.21703361 | 25.24330508 | 22.35701978 |
| O  | 12.37213503 | 25.25045131 | 22.44053047 |
| Zn | 13.80598098 | 26.66407636 | 22.40228089 |
| Zn | 10.91102635 | 25.24971220 | 26.63854483 |
| Zn | 10.90768608 | 25.28937597 | 23.83930241 |
| Zn | 13.79790192 | 23.83042084 | 22.41721750 |
| Zn | 15.21054675 | 22.35211748 | 25.23131621 |
| Zn | 12.35744467 | 22.37424956 | 25.24029575 |
| O  | 10.92092941 | 26.67657678 | 25.27711131 |
| O  | 19.48530906 | 22.29004607 | 26.61411700 |
| O  | 19.48508670 | 22.36166126 | 23.77981694 |
| O  | 16.64058780 | 23.76315200 | 25.16745476 |
| O  | 20.90170743 | 25.20480279 | 22.33040510 |
| O  | 18.06517894 | 25.19782471 | 22.35468470 |
| Zn | 19.47642973 | 26.62189731 | 22.34060868 |
| Zn | 16.62148903 | 25.20013284 | 26.54796093 |
| Zn | 16.64338696 | 25.22378608 | 23.76613813 |
| Zn | 19.48587032 | 23.78204779 | 22.35962745 |
| Zn | 20.90728802 | 22.31232337 | 25.19197178 |
| Zn | 18.06343552 | 22.34828056 | 25.19356554 |
| O  | 16.61919413 | 26.61885170 | 25.19264314 |
| O  | 25.18443989 | 22.30449247 | 26.58949796 |
| O  | 25.15665928 | 22.32463859 | 23.73801743 |
| O  | 22.32463837 | 23.73801735 | 25.15665951 |
| O  | 26.58949775 | 25.18444009 | 22.30449271 |
| O  | 23.73801727 | 25.15665952 | 22.32463853 |
| Zn | 25.16426909 | 26.55006940 | 22.32350483 |
| Zn | 22.32350462 | 25.16426909 | 26.55006949 |

|    |             |             |             |
|----|-------------|-------------|-------------|
| Zn | 22.32074962 | 25.19267870 | 23.74934661 |
| Zn | 25.19267861 | 23.74934663 | 22.32074973 |
| Zn | 26.55006917 | 22.32350474 | 25.16426926 |
| Zn | 23.74934642 | 22.32074968 | 25.19267882 |
| O  | 22.30449251 | 26.58949777 | 25.18444017 |
| O  | 30.79782385 | 22.30053137 | 23.67516517 |
| O  | 28.02557156 | 23.69974065 | 25.11822134 |
| O  | 29.42819483 | 25.10791101 | 22.25352197 |
| Zn | 27.59645314 | 25.10812910 | 26.42178050 |
| Zn | 28.11566479 | 25.25604994 | 23.66614153 |
| Zn | 30.44692270 | 23.58617636 | 22.26568365 |
| Zn | 29.31209553 | 22.27989664 | 24.75829789 |
| O  | 27.92486636 | 26.51908479 | 25.13643386 |
| O  | 8.11793968  | 28.05615561 | 26.64787948 |
| O  | 8.08309797  | 28.14322486 | 23.83286015 |
| O  | 9.56769676  | 30.93162638 | 22.43496402 |
| Zn | 8.48067170  | 29.43045812 | 22.41817482 |
| Zn | 9.55964875  | 28.20808330 | 25.32945794 |
| Zn | 6.79452062  | 27.76615742 | 25.25772608 |
| O  | 13.81566087 | 27.97997845 | 26.60297475 |
| O  | 13.77782960 | 28.10322548 | 23.78097994 |
| O  | 11.00389285 | 29.50040257 | 25.19017894 |
| O  | 15.21465279 | 30.90422832 | 22.29436498 |
| O  | 12.38001552 | 30.94204999 | 22.31860404 |
| Zn | 13.80247427 | 32.22806254 | 21.94774123 |
| Zn | 11.00515342 | 30.53053791 | 23.67860909 |
| Zn | 13.76109567 | 29.46871041 | 22.35994892 |
| Zn | 15.21305421 | 28.10569198 | 25.23657871 |
| Zn | 12.38308960 | 28.11430977 | 25.27545304 |
| O  | 19.45285779 | 27.93692011 | 26.55846546 |
| O  | 19.45726915 | 28.05475212 | 23.73039503 |
| O  | 16.63576560 | 29.44409403 | 25.09779038 |
| O  | 20.86427678 | 30.89500579 | 22.26984150 |
| O  | 18.03428976 | 30.87078808 | 22.27596518 |
| Zn | 19.45175294 | 32.18911467 | 21.91677690 |
| Zn | 16.62905816 | 30.46825673 | 23.59441641 |
| Zn | 19.48158357 | 29.42788148 | 22.31723752 |
| Zn | 20.86257951 | 28.04958197 | 25.20509224 |
| Zn | 18.04172775 | 28.08536854 | 25.20748598 |
| O  | 25.13643349 | 27.92486635 | 26.51908502 |
| O  | 25.11822113 | 28.02557172 | 23.69974080 |
| O  | 22.25352174 | 29.42819492 | 25.10791100 |
| O  | 23.67516518 | 30.79782409 | 22.30053149 |
| Zn | 22.26568360 | 30.44692284 | 23.58617637 |
| Zn | 24.75829783 | 29.31209572 | 22.27989674 |
| Zn | 26.42178018 | 27.59645325 | 25.10812936 |
| Zn | 23.66614126 | 28.11566485 | 25.25605006 |

|    |             |             |             |
|----|-------------|-------------|-------------|
| O  | 21.01310551 | 8.16840033  | 28.13076140 |
| Zn | 19.93751272 | 9.65719408  | 28.08277842 |
| O  | 26.64787936 | 8.11793953  | 28.05615587 |
| O  | 23.83286001 | 8.08309773  | 28.14322526 |
| Zn | 25.32945782 | 9.55964855  | 28.20808354 |
| Zn | 22.41817467 | 8.48067129  | 29.43045865 |
| Zn | 25.25772603 | 6.79452047  | 27.76615767 |
| O  | 22.43496416 | 9.56769665  | 30.93162666 |
| O  | 15.28228316 | 13.90527630 | 28.06959951 |
| Zn | 14.25740653 | 15.40657607 | 28.08221314 |
| O  | 19.45029310 | 10.95362480 | 32.31756506 |
| O  | 19.56664568 | 10.94320065 | 29.50524342 |
| O  | 16.69508308 | 12.38485670 | 30.88136938 |
| O  | 20.94262677 | 13.81894558 | 28.06630787 |
| O  | 18.10427845 | 13.78203123 | 28.10742973 |
| Zn | 19.48297687 | 15.22118025 | 28.07927431 |
| Zn | 16.55580223 | 13.67717720 | 32.32560831 |
| Zn | 16.60980676 | 13.77095654 | 29.50217084 |
| Zn | 19.52530402 | 12.41654585 | 28.12416694 |
| Zn | 20.94262803 | 10.78005269 | 31.10520156 |
| Zn | 18.20665066 | 11.35471983 | 30.88010611 |
| O  | 16.60814284 | 15.20868179 | 30.96432761 |
| O  | 25.19017928 | 11.00389260 | 29.50040298 |
| O  | 22.31860439 | 12.38001530 | 30.94205037 |
| O  | 26.60297480 | 13.81566077 | 27.97997881 |
| O  | 23.78098000 | 13.77782940 | 28.10322588 |
| Zn | 25.23657868 | 15.21305407 | 28.10569226 |
| Zn | 21.94774164 | 13.80247374 | 32.22806319 |
| Zn | 22.35994905 | 13.76109551 | 29.46871087 |
| Zn | 25.27545321 | 12.38308943 | 28.11431031 |
| Zn | 23.67860938 | 11.00515306 | 30.53053820 |
| O  | 22.29436523 | 15.21465245 | 30.90422897 |
| O  | 9.54149298  | 19.57828756 | 28.06032907 |
| Zn | 8.51492825  | 21.09325406 | 28.05487876 |
| O  | 13.76064835 | 16.67063245 | 32.34967419 |
| O  | 13.82426701 | 16.69670060 | 29.50629278 |
| O  | 11.00328486 | 18.12422690 | 30.93721720 |
| O  | 15.23228723 | 19.54771747 | 28.09533729 |
| O  | 12.36941950 | 19.51225198 | 28.11953351 |
| Zn | 13.76333096 | 20.94262590 | 28.12192358 |
| Zn | 11.31329440 | 19.52385052 | 32.24239430 |
| Zn | 10.85052050 | 19.45136816 | 29.49133226 |
| Zn | 13.79983755 | 18.16415884 | 28.10579706 |
| Zn | 15.24671271 | 16.63555085 | 30.97422742 |
| Zn | 12.49046220 | 17.04546702 | 30.90990902 |
| O  | 10.92986261 | 20.94262632 | 30.95539275 |
| O  | 19.48096972 | 16.59687430 | 32.38410773 |

|    |             |             |             |
|----|-------------|-------------|-------------|
| O  | 19.44472606 | 16.63480503 | 29.51311678 |
| O  | 16.64512388 | 18.05621770 | 30.93815090 |
| O  | 20.89151690 | 19.47025436 | 28.03375014 |
| O  | 18.05757942 | 19.47974417 | 28.10406973 |
| Zn | 19.48189222 | 20.89104295 | 28.07812298 |
| Zn | 16.61550499 | 19.46985483 | 32.35091543 |
| Zn | 16.64496300 | 19.51100058 | 29.52780516 |
| Zn | 19.46803985 | 18.05483526 | 28.08735598 |
| Zn | 20.83028946 | 16.61737290 | 30.94471824 |
| Zn | 18.04596101 | 16.59587861 | 30.97756494 |
| O  | 16.61182671 | 20.88797456 | 30.96918064 |
| O  | 25.09779038 | 16.63576547 | 29.44409428 |
| O  | 22.27596523 | 18.03428943 | 30.87078833 |
| O  | 26.55846527 | 19.45285773 | 27.93692038 |
| O  | 23.73039490 | 19.45726899 | 28.05475232 |
| Zn | 25.20509201 | 20.86257942 | 28.04958215 |
| Zn | 21.91677688 | 19.45175251 | 32.18911498 |
| Zn | 22.31723746 | 19.48158322 | 29.42788174 |
| Zn | 25.20748584 | 18.04172764 | 28.08536882 |
| Zn | 23.59441652 | 16.62905775 | 30.46825715 |
| O  | 22.26984140 | 20.86427641 | 30.89500610 |
| O  | 8.13299467  | 22.34089261 | 29.49882394 |
| O  | 9.53557684  | 25.21463234 | 28.12460400 |
| O  | 6.70733861  | 25.30795993 | 28.09826937 |
| Zn | 8.15129782  | 26.55583323 | 27.72045484 |
| Zn | 7.92663739  | 23.82157904 | 28.27796789 |
| Zn | 9.64286087  | 22.36140151 | 30.57196079 |
| O  | 13.82492242 | 22.30696861 | 32.34376519 |
| O  | 13.76571997 | 22.37300114 | 29.51583666 |
| O  | 10.94803643 | 23.76102593 | 30.88196506 |
| O  | 15.21250831 | 25.15321208 | 28.00427699 |
| O  | 12.37896309 | 25.18855835 | 28.06099533 |
| Zn | 13.80304332 | 26.47868153 | 27.62785328 |
| Zn | 10.97534295 | 24.83979405 | 29.39479330 |
| Zn | 13.77945387 | 23.72109970 | 28.08542090 |
| Zn | 15.21235839 | 22.38062863 | 30.96688428 |
| Zn | 12.39392092 | 22.43388580 | 31.03473622 |
| O  | 19.42355550 | 22.27000677 | 32.31917212 |
| O  | 19.46018098 | 22.32153322 | 29.47849436 |
| O  | 16.63072315 | 23.71978816 | 30.81163120 |
| O  | 20.87017256 | 25.12603068 | 27.98898350 |
| O  | 18.04381095 | 25.12209081 | 27.99049510 |
| Zn | 19.45677768 | 26.43397493 | 27.58104613 |
| Zn | 16.63021417 | 24.73919200 | 29.30718359 |
| Zn | 19.46001865 | 23.67261319 | 28.04890206 |
| Zn | 20.83074399 | 22.40443086 | 30.99619984 |
| Zn | 18.02682276 | 22.35630270 | 30.94921970 |

|    |             |             |             |
|----|-------------|-------------|-------------|
| O  | 25.10791075 | 22.25352165 | 29.42819510 |
| O  | 22.30053124 | 23.67516486 | 30.79782422 |
| O  | 26.51908467 | 25.13643350 | 27.92486668 |
| O  | 23.69974051 | 25.11822104 | 28.02557190 |
| Zn | 25.10812898 | 26.42178017 | 27.59645349 |
| Zn | 22.27989648 | 24.75829754 | 29.31209588 |
| Zn | 25.25604975 | 23.66614121 | 28.11566508 |
| Zn | 23.58617616 | 22.26568328 | 30.44692308 |
| O  | 15.23737808 | 13.82910902 | 33.76731000 |
| Zn | 14.16479604 | 15.32942494 | 33.73395505 |
| O  | 20.87214961 | 13.75449068 | 33.71685652 |
| O  | 18.05239720 | 13.74203432 | 33.80216084 |
| Zn | 19.54104865 | 15.19492388 | 33.88296915 |
| Zn | 16.62752455 | 14.11910620 | 35.09073061 |
| Zn | 19.46707917 | 12.45479599 | 33.40458648 |
| O  | 16.61745529 | 15.21034438 | 36.59826659 |
| O  | 13.78698393 | 16.57729829 | 35.17791509 |
| O  | 15.19683093 | 19.43888506 | 33.81052270 |
| O  | 12.38643137 | 19.54436349 | 33.75226054 |
| Zn | 13.83038204 | 20.79200214 | 33.37032713 |
| Zn | 13.60728280 | 18.06367614 | 33.95861589 |
| Zn | 15.27128766 | 16.60338639 | 36.30008051 |
| O  | 19.46798028 | 16.60165481 | 35.23098312 |
| O  | 16.60773059 | 18.00701961 | 36.60073480 |
| O  | 20.83888134 | 19.46203604 | 33.67766914 |
| O  | 18.03113894 | 19.43060344 | 33.80393870 |
| Zn | 19.42285718 | 20.74720218 | 33.33831335 |
| Zn | 16.61922201 | 19.11092900 | 35.11601745 |
| Zn | 19.56484941 | 17.99556751 | 33.88283893 |
| Zn | 17.96194548 | 16.60583048 | 36.29033215 |

**SOD-600**

|    |             |             |            |
|----|-------------|-------------|------------|
| Zn | 28.10507883 | 25.61750352 | 3.89643994 |
| O  | 28.12058181 | 26.72457394 | 2.41388976 |
| O  | 25.25841477 | 28.12738683 | 3.78163192 |
| Zn | 26.76643632 | 28.12566026 | 2.72482887 |
| O  | 30.93951108 | 28.15072894 | 3.84633434 |
| O  | 28.11211489 | 29.52104447 | 2.42334860 |
| Zn | 28.09996823 | 30.60962136 | 3.93326878 |
| Zn | 29.45694010 | 28.12669713 | 2.72220362 |
| Zn | 22.42604479 | 19.96005651 | 9.68717306 |
| O  | 22.41244395 | 21.04185964 | 8.19975032 |
| Zn | 28.07438179 | 19.97478291 | 9.69872642 |
| O  | 28.08158688 | 21.00108305 | 8.19851482 |
| Zn | 33.71784439 | 19.88473113 | 9.62116575 |
| O  | 33.76049847 | 20.96287417 | 8.13335280 |

|    |             |             |            |
|----|-------------|-------------|------------|
| O  | 19.60104351 | 22.45778917 | 9.56231615 |
| Zn | 21.12550545 | 22.45144921 | 8.54668360 |
| O  | 25.25034622 | 22.39470557 | 9.52404889 |
| O  | 25.29245047 | 22.45298182 | 6.68392505 |
| O  | 22.44314080 | 23.85317023 | 8.10175912 |
| O  | 26.69098718 | 25.29389546 | 5.20466989 |
| O  | 23.88368909 | 25.26333862 | 5.32550711 |
| Zn | 25.15866186 | 26.72995944 | 5.12634513 |
| Zn | 22.40137176 | 25.23351057 | 9.57148593 |
| Zn | 22.80275493 | 25.26778792 | 6.81180641 |
| Zn | 25.29881526 | 23.97703871 | 5.66694686 |
| Zn | 26.68591675 | 22.36410069 | 8.05696061 |
| Zn | 23.88227365 | 22.31300139 | 8.00360697 |
| O  | 22.44580146 | 26.68386034 | 8.13195451 |
| O  | 30.94233537 | 22.34989175 | 9.50149946 |
| O  | 30.88871602 | 22.41833255 | 6.67229304 |
| O  | 28.10054983 | 23.83402019 | 8.04064178 |
| O  | 32.33550587 | 25.18150563 | 5.27301920 |
| O  | 29.52538195 | 25.28869660 | 5.20376974 |
| Zn | 31.11501653 | 26.66270485 | 5.06490549 |
| Zn | 28.07189335 | 25.20938095 | 9.48328242 |
| Zn | 28.10372822 | 25.25382986 | 6.66081081 |
| Zn | 30.88898104 | 23.93420197 | 5.64739913 |
| Zn | 32.31569125 | 22.29226883 | 7.98510746 |
| Zn | 29.49910201 | 22.34100137 | 8.04713684 |
| O  | 28.07605413 | 26.66619340 | 8.07485353 |
| O  | 36.57367352 | 22.38448024 | 9.52685301 |
| O  | 33.78041959 | 23.78307646 | 8.07400661 |
| Zn | 33.86119199 | 25.27318231 | 9.54049125 |
| Zn | 33.40350040 | 25.20233408 | 6.78641322 |
| Zn | 35.06450207 | 22.36051211 | 8.45124372 |
| O  | 33.71614991 | 26.60024110 | 8.09275544 |
| O  | 19.62213695 | 28.07341806 | 9.56043104 |
| Zn | 21.12657011 | 28.08725294 | 8.53806886 |
| O  | 25.27485722 | 28.08454660 | 9.49884492 |
| O  | 25.24288206 | 28.12612812 | 6.62763930 |
| O  | 22.42646956 | 29.50290385 | 8.10495299 |
| O  | 26.67394213 | 30.98407347 | 5.22017365 |
| O  | 23.85464961 | 30.97300164 | 5.30011609 |
| Zn | 25.26027207 | 32.27026294 | 5.62195079 |
| Zn | 22.36718952 | 30.95160000 | 9.54525134 |
| Zn | 22.77652823 | 30.91886721 | 6.78684507 |
| Zn | 25.18419806 | 29.53131057 | 5.13216983 |
| Zn | 26.67536301 | 28.12662595 | 8.03664077 |
| Zn | 23.89116947 | 28.10087015 | 8.06482374 |
| O  | 22.40795303 | 32.33854059 | 8.07739692 |
| O  | 30.89435660 | 28.02667162 | 9.51995093 |

|    |             |             |             |
|----|-------------|-------------|-------------|
| O  | 30.96215788 | 28.05403705 | 6.67513745  |
| O  | 28.11332000 | 29.51373037 | 8.05886680  |
| O  | 29.48855367 | 30.89749074 | 5.25886731  |
| Zn | 28.11609517 | 30.94778668 | 9.52501588  |
| Zn | 28.16832387 | 31.04634348 | 6.70014827  |
| Zn | 30.56031972 | 29.39659879 | 5.29195526  |
| Zn | 32.22947960 | 27.67952469 | 8.11733444  |
| Zn | 29.47446999 | 28.08654874 | 8.04915172  |
| O  | 28.03018136 | 32.33581498 | 8.14715519  |
| O  | 19.52717268 | 33.70241490 | 9.50923138  |
| Zn | 21.04602770 | 33.71216694 | 8.48922821  |
| O  | 25.15928392 | 33.77684636 | 9.52805168  |
| O  | 25.27650316 | 33.76774680 | 6.71377450  |
| O  | 22.29317126 | 35.15079289 | 8.10397728  |
| Zn | 22.31713456 | 36.22641263 | 9.61314500  |
| Zn | 26.51917051 | 33.36679482 | 8.15227958  |
| Zn | 23.78405513 | 33.93641810 | 7.92721205  |
| Zn | 16.76210477 | 14.27332556 | 15.44751036 |
| O  | 16.73285390 | 15.35081335 | 13.94449840 |
| Zn | 22.41678365 | 14.28759094 | 15.43798382 |
| O  | 22.41847197 | 15.31272793 | 13.93662555 |
| Zn | 28.06787629 | 14.26465223 | 15.40540398 |
| O  | 28.06360968 | 15.28158794 | 13.89768514 |
| Zn | 33.72911689 | 14.20915119 | 15.36298948 |
| O  | 33.71935865 | 15.23481956 | 13.86219856 |
| Zn | 39.38566346 | 14.11732679 | 15.28104313 |
| O  | 39.41875825 | 15.18908909 | 13.78014933 |
| O  | 13.94449700 | 16.73285425 | 15.35081420 |
| Zn | 15.44750877 | 16.76210571 | 14.27332612 |
| O  | 19.56284200 | 16.68320090 | 15.27864649 |
| O  | 19.61813938 | 16.76569094 | 12.44109196 |
| O  | 16.74981823 | 18.16976990 | 13.84038335 |
| O  | 21.00890973 | 19.60662629 | 10.97806611 |
| O  | 18.19790145 | 19.57369653 | 11.07271045 |
| Zn | 19.46774618 | 21.04544845 | 10.88054758 |
| Zn | 16.70334857 | 19.54513717 | 15.31725793 |
| Zn | 17.11224303 | 19.59127267 | 12.55660165 |
| Zn | 19.60820746 | 18.28872049 | 11.42404939 |
| Zn | 21.00743074 | 16.66446039 | 13.82166737 |
| Zn | 18.20316605 | 16.61407658 | 13.75091281 |
| O  | 16.74304205 | 20.99993620 | 13.88042602 |
| O  | 25.24481136 | 16.68744930 | 15.26804192 |
| O  | 25.23996312 | 16.77253464 | 12.44234149 |
| O  | 22.41111795 | 18.14113690 | 13.82236859 |
| O  | 26.65896249 | 19.58677628 | 11.01175744 |
| O  | 23.83662104 | 19.59008915 | 11.00822471 |
| Zn | 25.24771165 | 21.04086069 | 10.95179673 |

|    |             |             |             |
|----|-------------|-------------|-------------|
| Zn | 22.39187209 | 19.52978695 | 15.25645229 |
| Zn | 22.38607575 | 19.55522002 | 12.44990545 |
| Zn | 25.24131892 | 18.27638523 | 11.41953007 |
| Zn | 26.65615382 | 16.64049332 | 13.78958485 |
| Zn | 23.82844724 | 16.66587623 | 13.79590158 |
| O  | 22.39831011 | 20.97930422 | 13.84555321 |
| O  | 30.91541022 | 16.64608454 | 15.22688196 |
| O  | 30.89149738 | 16.72899766 | 12.40520125 |
| O  | 28.07966957 | 18.10417788 | 13.81522923 |
| O  | 32.31402443 | 19.53053435 | 10.95106010 |
| O  | 29.48892280 | 19.56076304 | 11.00489158 |
| Zn | 30.91725678 | 20.99782532 | 10.93003181 |
| Zn | 28.06378992 | 19.49778586 | 15.24416122 |
| Zn | 28.07702596 | 19.51972190 | 12.45741564 |
| Zn | 30.89804921 | 18.23360354 | 11.38341253 |
| Zn | 32.31982713 | 16.59982084 | 13.73940719 |
| Zn | 29.48687876 | 16.62218131 | 13.76702953 |
| O  | 28.06269374 | 20.95382634 | 13.83886747 |
| O  | 36.61875992 | 16.56431969 | 15.16390925 |
| O  | 36.53046504 | 16.64745999 | 12.34182076 |
| O  | 33.75679685 | 18.05463157 | 13.74552241 |
| O  | 37.96385849 | 19.40114780 | 10.90987823 |
| O  | 35.14958887 | 19.51837510 | 10.90081779 |
| Zn | 36.75038336 | 20.89359196 | 10.74125486 |
| Zn | 33.74084328 | 19.43439510 | 15.18389384 |
| Zn | 33.77554250 | 19.47542674 | 12.38029130 |
| Zn | 36.52537360 | 18.15847229 | 11.31084241 |
| Zn | 37.97746998 | 16.50930741 | 13.63129506 |
| Zn | 35.15261106 | 16.56154530 | 13.72984786 |
| O  | 33.72935319 | 20.89411038 | 13.78174408 |
| O  | 42.25426962 | 16.56553808 | 15.15658384 |
| O  | 39.45744384 | 18.00370362 | 13.69355328 |
| Zn | 39.54544927 | 19.49344088 | 15.14632064 |
| Zn | 39.05566956 | 19.41739003 | 12.40737133 |
| Zn | 40.74435468 | 16.57768126 | 14.06800158 |
| O  | 39.37750638 | 20.82299829 | 13.70462980 |
| O  | 13.93662561 | 22.41847215 | 15.31272839 |
| Zn | 15.43798328 | 22.41678419 | 14.28759066 |
| O  | 19.57942830 | 22.38114037 | 15.26410301 |
| O  | 19.55080123 | 22.41096311 | 12.40129948 |
| O  | 16.75268218 | 23.82799001 | 13.87936466 |
| O  | 20.98784943 | 25.25403056 | 10.94382480 |
| O  | 18.15741585 | 25.25534774 | 11.06192042 |
| Zn | 19.50903868 | 26.66658620 | 10.91764783 |
| Zn | 16.68603391 | 25.24081061 | 15.33074677 |
| Zn | 17.13799797 | 25.24831091 | 12.56744112 |
| Zn | 19.51336076 | 23.84951958 | 10.93921597 |



|    |             |             |             |
|----|-------------|-------------|-------------|
| Zn | 20.98002936 | 22.39346042 | 13.80333773 |
| Zn | 18.19824515 | 22.40781675 | 13.82907169 |
| O  | 16.72662000 | 26.65677385 | 13.88094433 |
| O  | 25.22748436 | 22.35775402 | 15.22699309 |
| O  | 25.22986895 | 22.42430787 | 12.38640892 |
| O  | 22.39222855 | 23.81503044 | 13.79504381 |
| O  | 26.65846989 | 25.23598209 | 10.90526591 |
| O  | 23.82594997 | 25.24675948 | 10.96610610 |
| Zn | 25.24969708 | 26.66146620 | 10.92147356 |
| Zn | 22.36170367 | 25.22391396 | 15.22185105 |
| Zn | 22.37683009 | 25.23635440 | 12.37755536 |
| Zn | 25.23407215 | 23.82435290 | 10.92464628 |
| Zn | 26.64517365 | 22.37097808 | 13.81183295 |
| Zn | 23.81226067 | 22.40347091 | 13.81057758 |
| O  | 22.36642903 | 26.64259375 | 13.80529645 |
| O  | 30.90921379 | 22.31374314 | 15.19528357 |
| O  | 30.90695142 | 22.38268317 | 12.36158782 |
| O  | 28.06899688 | 23.77810573 | 13.76102207 |
| O  | 32.34357637 | 25.20870427 | 10.91035734 |
| O  | 29.48236295 | 25.17778752 | 10.91754767 |
| Zn | 30.91557023 | 26.55912716 | 10.92022166 |
| Zn | 28.02008822 | 25.18098964 | 15.18942733 |
| Zn | 28.05962303 | 25.18730680 | 12.33659474 |
| Zn | 30.94710437 | 23.77926044 | 10.89659495 |
| Zn | 32.32819077 | 22.35576640 | 13.78339532 |
| Zn | 29.48897564 | 22.36473146 | 13.78474995 |
| O  | 28.00618428 | 26.59681831 | 13.76786273 |
| O  | 36.57266864 | 22.25117395 | 15.17473981 |
| O  | 36.60022195 | 22.26969976 | 12.33910479 |
| O  | 33.76917012 | 23.73294379 | 13.75546878 |
| O  | 35.16840998 | 25.15048613 | 10.97522773 |
| Zn | 33.77392270 | 25.19251916 | 15.18683670 |
| Zn | 33.78922363 | 25.22667226 | 12.36222082 |
| Zn | 36.18841151 | 23.63162998 | 10.96546695 |
| Zn | 37.89077666 | 21.90112010 | 13.75878290 |
| Zn | 35.13237433 | 22.31046219 | 13.72603279 |
| O  | 33.65027192 | 26.55880430 | 13.78946958 |
| O  | 13.89768521 | 28.06360969 | 15.28158666 |
| Zn | 15.40540347 | 28.06787745 | 14.26465007 |
| O  | 19.55174355 | 28.06175160 | 15.24439776 |
| O  | 19.52496231 | 28.08410603 | 12.38887343 |
| O  | 16.71193938 | 29.48591544 | 13.85468805 |
| O  | 20.94470555 | 30.92216836 | 10.90845627 |
| O  | 18.11884633 | 30.88817043 | 11.02737166 |
| Zn | 19.45097846 | 32.31541920 | 10.88841941 |
| Zn | 16.64522911 | 30.91605766 | 15.29059853 |
| Zn | 17.09798737 | 30.89354231 | 12.53182881 |

|    |             |             |             |
|----|-------------|-------------|-------------|
| Zn | 19.48512849 | 29.49080192 | 10.90371436 |
| Zn | 20.95234676 | 28.05977259 | 13.78309465 |
| Zn | 18.16959926 | 28.07864098 | 13.80895116 |
| O  | 16.68911312 | 32.32027702 | 13.82980760 |
| O  | 25.19022960 | 28.02094719 | 15.19192926 |
| O  | 25.19736583 | 28.07049306 | 12.34480489 |
| O  | 22.36390216 | 29.48235958 | 13.76842036 |
| O  | 26.62301576 | 30.93213176 | 10.92083673 |
| O  | 23.78353931 | 30.89590473 | 10.94827630 |
| Zn | 25.20221743 | 32.29736549 | 10.90209784 |
| Zn | 22.31291367 | 30.89289267 | 15.18865723 |
| Zn | 22.32187572 | 30.89425064 | 12.34944012 |
| Zn | 25.24325202 | 29.49375836 | 10.93678673 |
| Zn | 26.60424665 | 28.05585526 | 13.77425459 |
| Zn | 23.78039735 | 28.06169752 | 13.76747454 |
| O  | 22.29496038 | 32.31605393 | 13.77068097 |
| O  | 30.82294990 | 27.96570186 | 15.19171908 |
| O  | 30.84784053 | 27.98853754 | 12.35735512 |
| O  | 28.03156212 | 29.45076413 | 13.76221756 |
| O  | 29.44282132 | 30.81544647 | 10.95827137 |
| Zn | 28.05546081 | 30.91061264 | 15.19075787 |
| Zn | 28.07783179 | 30.93824990 | 12.35780460 |
| Zn | 30.46850122 | 29.31466030 | 10.94852358 |
| Zn | 32.14581461 | 27.57966100 | 13.78409576 |
| Zn | 29.38704354 | 28.03241285 | 13.76157032 |
| O  | 27.94864123 | 32.27244603 | 13.78614124 |
| O  | 13.86219962 | 33.71935801 | 15.23481748 |
| Zn | 15.36299049 | 33.72911687 | 14.20914906 |
| O  | 19.49986047 | 33.76009083 | 15.19528155 |
| O  | 19.46894773 | 33.76727806 | 12.33406172 |
| O  | 16.65097630 | 35.15767924 | 13.78328327 |
| O  | 20.89456626 | 36.60364749 | 10.89722213 |
| O  | 18.07740537 | 36.58487751 | 10.96149189 |
| Zn | 19.47529769 | 37.89122775 | 11.27414940 |
| Zn | 16.59109478 | 36.62847974 | 15.20316781 |
| Zn | 16.99812098 | 36.56028878 | 12.44816086 |
| Zn | 19.40448376 | 35.13715076 | 10.81644662 |
| Zn | 20.89838616 | 33.78104402 | 13.73053153 |
| Zn | 18.11852381 | 33.75741357 | 13.76207061 |
| O  | 16.62359722 | 38.00248712 | 13.71547783 |
| O  | 25.11687592 | 33.67275263 | 15.18871647 |
| O  | 25.14710712 | 33.72659495 | 12.36361324 |
| O  | 22.32774472 | 35.17614929 | 13.73530327 |
| O  | 23.71477156 | 36.54430280 | 10.91715141 |
| Zn | 22.33663468 | 36.63050123 | 15.17854392 |
| Zn | 22.38537148 | 36.69254101 | 12.36195739 |
| Zn | 24.79291237 | 35.05648864 | 10.95978976 |

|    |             |             |             |
|----|-------------|-------------|-------------|
| Zn | 26.44403461 | 33.29423241 | 13.77958470 |
| Zn | 23.67981706 | 33.74761569 | 13.76037351 |
| O  | 22.25931066 | 38.00535220 | 13.78893421 |
| O  | 13.78015214 | 39.41875764 | 15.18908799 |
| Zn | 15.28104516 | 39.38566294 | 14.11732465 |
| O  | 19.38893850 | 39.47386618 | 15.15226296 |
| O  | 19.49613595 | 39.40462522 | 12.34214070 |
| O  | 16.52690653 | 40.83129562 | 13.73814892 |
| Zn | 16.55092355 | 41.95544293 | 15.22070546 |
| Zn | 20.74343984 | 39.03024365 | 13.78865909 |
| Zn | 18.01494273 | 39.61274954 | 13.56263343 |
| Zn | 22.45144569 | 8.54668485  | 21.12550624 |
| O  | 22.45778780 | 9.56231707  | 19.60104415 |
| Zn | 28.08724946 | 8.53807167  | 21.12656948 |
| O  | 28.07341690 | 9.56043268  | 19.62213567 |
| Zn | 33.71216353 | 8.48923235  | 21.04602566 |
| O  | 33.70241314 | 9.50923420  | 19.52716996 |
| O  | 15.35081259 | 13.94449737 | 16.73285546 |
| Zn | 14.27332471 | 15.44750927 | 16.76210662 |
| O  | 19.60662540 | 10.97806706 | 21.00891131 |
| O  | 19.57369572 | 11.07271144 | 18.19790309 |
| O  | 16.76568942 | 12.44109170 | 19.61814125 |
| O  | 20.99993586 | 13.88042641 | 16.74304286 |
| O  | 18.16976912 | 13.84038369 | 16.74982000 |
| Zn | 19.54513650 | 15.31725802 | 16.70334965 |
| Zn | 16.66445957 | 13.82166726 | 21.00743248 |
| Zn | 16.61407583 | 13.75091255 | 18.20316775 |
| Zn | 19.59127227 | 12.55660232 | 17.11224429 |
| Zn | 21.04544769 | 10.88054981 | 19.46774794 |
| Zn | 18.28871951 | 11.42405003 | 19.60820893 |
| O  | 16.68320024 | 15.27864618 | 19.56284359 |
| O  | 25.25402992 | 10.94382650 | 20.98784986 |
| O  | 25.25534653 | 11.06192053 | 18.15741581 |
| O  | 22.41096281 | 12.40130036 | 19.55080255 |
| O  | 26.65677313 | 13.88094503 | 16.72662024 |
| O  | 23.82798951 | 13.87936473 | 16.75268266 |
| Zn | 25.24080960 | 15.33074711 | 16.68603374 |
| Zn | 22.39346030 | 13.80333869 | 20.98003058 |
| Zn | 22.40781668 | 13.82907200 | 18.19824594 |
| Zn | 25.24831087 | 12.56744100 | 17.13799771 |
| Zn | 26.66658512 | 10.91764964 | 19.50903873 |
| Zn | 23.84951893 | 10.93921585 | 19.51336118 |
| O  | 22.38114006 | 15.26410344 | 19.57942906 |
| O  | 30.92216730 | 10.90845881 | 20.94470462 |
| O  | 30.88816893 | 11.02737327 | 18.11884494 |
| O  | 28.08410494 | 12.38887482 | 19.52496189 |
| O  | 32.32027675 | 13.82980905 | 16.68911189 |

|    |             |             |             |
|----|-------------|-------------|-------------|
| O  | 29.48591496 | 13.85469008 | 16.71193939 |
| Zn | 30.91605759 | 15.29060003 | 16.64522839 |
| Zn | 28.05977275 | 13.78309463 | 20.95234706 |
| Zn | 28.07864040 | 13.80895328 | 18.16959935 |
| Zn | 30.89354182 | 12.53183036 | 17.09798588 |
| Zn | 32.31541769 | 10.88842258 | 19.45097687 |
| Zn | 29.49080074 | 10.90371599 | 19.48512759 |
| O  | 28.06175133 | 15.24439871 | 19.55174423 |
| O  | 36.60364509 | 10.89722635 | 20.89456534 |
| O  | 36.58487593 | 10.96149548 | 18.07740429 |
| O  | 33.76727662 | 12.33406469 | 19.46894731 |
| O  | 38.00248644 | 13.71548090 | 16.62359525 |
| O  | 35.15767848 | 13.78328698 | 16.65097614 |
| Zn | 36.62848016 | 15.20317092 | 16.59109327 |
| Zn | 33.78104430 | 13.73053380 | 20.89838638 |
| Zn | 33.75741231 | 13.76207394 | 18.11852352 |
| Zn | 36.56028743 | 12.44816444 | 16.99811992 |
| Zn | 37.89122539 | 11.27415432 | 19.47529696 |
| Zn | 35.13714907 | 10.81644960 | 19.40448228 |
| O  | 33.76009029 | 15.19528403 | 19.49986068 |
| O  | 39.40462349 | 12.34214452 | 19.49613419 |
| O  | 40.83129484 | 13.73815203 | 16.52690572 |
| Zn | 41.95544464 | 15.22070707 | 16.55092055 |
| Zn | 39.03024343 | 13.78866229 | 20.74343905 |
| Zn | 39.61274671 | 13.56263871 | 18.01494142 |
| O  | 39.47386544 | 15.15226631 | 19.38893750 |
| O  | 13.88042542 | 16.74304215 | 20.99993770 |
| O  | 13.84038259 | 16.74981879 | 18.16977097 |
| O  | 11.07271024 | 18.19790170 | 19.57369772 |
| O  | 15.27864587 | 19.56284209 | 16.68320133 |
| O  | 12.44109131 | 19.61813995 | 16.76569149 |
| Zn | 13.82166699 | 21.00743098 | 16.66446076 |
| Zn | 10.88054824 | 19.46774636 | 21.04544990 |
| Zn | 11.42404990 | 19.60820745 | 18.28872172 |
| Zn | 13.75091198 | 18.20316643 | 16.61407744 |
| Zn | 15.31725707 | 16.70334906 | 19.54513831 |
| Zn | 12.55660119 | 17.11224302 | 19.59127414 |
| O  | 10.97806738 | 21.00890978 | 19.60662768 |
| O  | 19.53508149 | 16.67237193 | 20.96610749 |
| O  | 19.54229012 | 16.71020732 | 18.12990169 |
| O  | 16.71020640 | 18.12990105 | 19.54229153 |
| O  | 20.96610647 | 19.53508185 | 16.67237177 |
| O  | 18.12990061 | 19.54229089 | 16.71020729 |
| Zn | 19.55650574 | 20.95811370 | 16.68469862 |
| Zn | 16.68469828 | 19.55650597 | 20.95811455 |
| Zn | 16.67600209 | 19.54668819 | 18.11742083 |
| Zn | 19.54668788 | 18.11742038 | 16.67600272 |

|    |             |             |             |
|----|-------------|-------------|-------------|
| Zn | 20.95811319 | 16.68469884 | 19.55650657 |
| Zn | 18.11741974 | 16.67600240 | 19.54668916 |
| O  | 16.67237204 | 20.96610657 | 19.53508254 |
| O  | 25.22316137 | 16.64396811 | 20.94627838 |
| O  | 25.21882395 | 16.71334856 | 18.12000159 |
| O  | 22.37746540 | 18.09896158 | 19.51805644 |
| O  | 26.64365816 | 19.53012299 | 16.65765379 |
| O  | 23.80094213 | 19.52866935 | 16.68216388 |
| Zn | 25.22129909 | 20.94330821 | 16.65128179 |
| Zn | 22.35475212 | 19.51798764 | 20.93648224 |
| Zn | 22.37950407 | 19.51727860 | 18.09675267 |
| Zn | 25.22358897 | 18.11651670 | 16.66147855 |
| Zn | 26.64335831 | 16.66539991 | 19.53384854 |
| Zn | 23.79920494 | 16.68744670 | 19.53850270 |
| O  | 22.35301966 | 20.93447941 | 19.51741792 |
| O  | 30.91661517 | 16.60863933 | 20.89953982 |
| O  | 30.90976993 | 16.67146050 | 18.08082771 |
| O  | 28.06886847 | 18.07116797 | 19.48720266 |
| O  | 32.33282240 | 19.48028078 | 16.60715494 |
| O  | 29.48570017 | 19.48741779 | 16.65669746 |
| Zn | 30.91015524 | 20.89724582 | 16.61594455 |
| Zn | 28.02988828 | 19.48739564 | 20.90512820 |
| Zn | 28.06449566 | 19.49243977 | 18.07150232 |
| Zn | 30.90337143 | 18.07340012 | 16.62180378 |
| Zn | 32.34104052 | 16.61802018 | 19.49034172 |
| Zn | 29.48820517 | 16.65754786 | 19.49665926 |
| O  | 28.03054517 | 20.90573915 | 19.49132541 |
| O  | 36.63699574 | 16.57710027 | 20.84361714 |
| O  | 36.60277763 | 16.60159341 | 18.01144415 |
| O  | 33.77236599 | 18.01917635 | 19.44166550 |
| O  | 38.04998232 | 19.43475968 | 16.55150426 |
| O  | 35.17877926 | 19.40278326 | 16.59310374 |
| Zn | 36.61279899 | 20.78647365 | 16.57677192 |
| Zn | 33.75299323 | 19.44356934 | 20.85329634 |
| Zn | 33.75615421 | 19.42794571 | 18.01618373 |
| Zn | 36.64098349 | 18.00227945 | 16.55101451 |
| Zn | 38.01682137 | 16.57391924 | 19.42380523 |
| Zn | 35.19435130 | 16.60575082 | 19.46826562 |
| O  | 33.71152104 | 20.85169539 | 19.43089188 |
| O  | 42.26373751 | 16.55707091 | 17.95304917 |
| O  | 39.47296494 | 17.98666221 | 19.38373596 |
| O  | 40.89599249 | 19.41922992 | 16.55023707 |
| Zn | 39.01069669 | 19.37884672 | 20.70059076 |
| Zn | 39.55127571 | 19.51898442 | 17.94766906 |
| Zn | 41.95281288 | 17.91122794 | 16.55196232 |
| Zn | 40.78120269 | 16.57256470 | 19.06012880 |
| O  | 39.35212984 | 20.79396199 | 19.41429521 |

|    |             |             |             |
|----|-------------|-------------|-------------|
| O  | 8.19975096  | 22.41244291 | 21.04185851 |
| Zn | 9.68717427  | 22.42604541 | 19.96005595 |
| O  | 13.84555400 | 22.39830997 | 20.97930513 |
| O  | 13.82236949 | 22.41111802 | 18.14113755 |
| O  | 11.00822580 | 23.83662120 | 19.59008873 |
| O  | 15.26804258 | 25.24481205 | 16.68744939 |
| O  | 12.44234259 | 25.23996262 | 16.77253392 |
| Zn | 13.78958480 | 26.65615405 | 16.64049205 |
| Zn | 10.95179755 | 25.24771241 | 21.04086006 |
| Zn | 11.41953138 | 25.24131876 | 18.27638454 |
| Zn | 13.79590389 | 23.82844719 | 16.66587722 |
| Zn | 15.25645289 | 22.39187227 | 19.52978779 |
| Zn | 12.44990649 | 22.38607590 | 19.55522086 |
| O  | 11.01175844 | 26.65896241 | 19.58677529 |
| O  | 19.51741800 | 22.35301959 | 20.93447968 |
| O  | 19.51805613 | 22.37746587 | 18.09896143 |
| O  | 16.68216426 | 23.80094258 | 19.52866955 |
| O  | 20.94627809 | 25.22316158 | 16.64396751 |
| O  | 18.12000161 | 25.21882448 | 16.71334825 |
| Zn | 19.53384844 | 26.64335879 | 16.66539915 |
| Zn | 16.65128255 | 25.22129949 | 20.94330848 |
| Zn | 16.66147907 | 25.22358938 | 18.11651680 |
| Zn | 19.53850236 | 23.79920527 | 16.68744637 |
| Zn | 20.93648194 | 22.35475237 | 19.51798751 |
| Zn | 18.09675278 | 22.37950428 | 19.51727886 |
| O  | 16.65765439 | 26.64365849 | 19.53012310 |
| O  | 25.19249782 | 22.32154024 | 20.90569455 |
| O  | 25.19065972 | 22.35975377 | 18.06950721 |
| O  | 22.35609342 | 23.77194497 | 19.48513889 |
| O  | 26.60647277 | 25.19044088 | 16.60876370 |
| O  | 23.77190008 | 25.18632228 | 16.64708674 |
| Zn | 25.18520367 | 26.60614383 | 16.61313239 |
| Zn | 22.32617996 | 25.18913937 | 20.90469852 |
| Zn | 22.35826128 | 25.19148129 | 18.06724288 |
| Zn | 25.19024344 | 23.77251391 | 16.64774990 |
| Zn | 26.61039172 | 22.31937574 | 19.48615958 |
| Zn | 23.77293708 | 22.35145457 | 19.48850291 |
| O  | 22.31788428 | 26.60813412 | 19.48697701 |
| O  | 30.88258980 | 22.28541092 | 20.86261399 |
| O  | 30.87233377 | 22.31121238 | 18.03505211 |
| O  | 28.03366269 | 23.73136094 | 19.45447525 |
| O  | 32.28876153 | 25.15268243 | 16.59353602 |
| O  | 29.43323911 | 25.12590399 | 16.61588530 |
| Zn | 30.86868691 | 26.50804429 | 16.59899544 |
| Zn | 27.99018912 | 25.13914242 | 20.87842848 |
| Zn | 28.01223201 | 25.14379609 | 18.03427802 |
| Zn | 30.89453142 | 23.72529662 | 16.61787236 |

|    |             |             |             |
|----|-------------|-------------|-------------|
| Zn | 32.30007343 | 22.30080582 | 19.44129031 |
| Zn | 29.45577911 | 22.31593489 | 19.45373207 |
| O  | 27.96429333 | 26.55764202 | 19.45881192 |
| O  | 36.57587583 | 22.23449963 | 20.82446944 |
| O  | 36.54567151 | 22.23183948 | 17.99378282 |
| O  | 33.73380546 | 23.68979295 | 19.42361206 |
| O  | 35.11720538 | 25.05551066 | 16.60422028 |
| Zn | 33.73842325 | 25.16428389 | 20.82811615 |
| Zn | 33.75998247 | 25.16860193 | 18.01105301 |
| Zn | 36.13955083 | 23.55106895 | 16.59039135 |
| Zn | 37.86581903 | 21.87488338 | 19.40984950 |
| Zn | 35.10614183 | 22.27626685 | 19.44414756 |
| O  | 33.61572106 | 26.52022862 | 19.42229201 |
| O  | 8.19851464  | 28.08158556 | 21.00108053 |
| Zn | 9.69872680  | 28.07438133 | 19.97478111 |
| O  | 13.83886782 | 28.06269372 | 20.95382539 |
| O  | 13.81522994 | 28.07966987 | 18.10417682 |
| O  | 11.00489159 | 29.48892247 | 19.56076065 |
| O  | 15.22688282 | 30.91540976 | 16.64608327 |
| O  | 12.40520181 | 30.89149729 | 16.72899522 |
| Zn | 13.73940842 | 32.31982670 | 16.59981923 |
| Zn | 10.93003241 | 30.91725613 | 20.99782314 |
| Zn | 11.38341266 | 30.89804907 | 18.23360076 |
| Zn | 13.76703018 | 29.48687861 | 16.62218024 |
| Zn | 15.24416181 | 28.06379016 | 19.49778510 |
| Zn | 12.45741621 | 28.07702644 | 19.51972068 |
| O  | 10.95106084 | 32.31402374 | 19.53053215 |
| O  | 19.49132602 | 28.03054506 | 20.90573867 |
| O  | 19.48720292 | 28.06886898 | 18.07116725 |
| O  | 16.65669793 | 29.48570064 | 19.48741695 |
| O  | 20.89953971 | 30.91661569 | 16.60863770 |
| O  | 18.08082802 | 30.90977036 | 16.67145918 |
| Zn | 19.49034170 | 32.34104122 | 16.61801791 |
| Zn | 16.61594494 | 30.91015626 | 20.89724474 |
| Zn | 16.62180431 | 30.90337175 | 18.07339909 |
| Zn | 19.49665924 | 29.48820553 | 16.65754690 |
| Zn | 20.90512851 | 28.02988843 | 19.48739484 |
| Zn | 18.07150285 | 28.06449593 | 19.49243947 |
| O  | 16.60715562 | 32.33282310 | 19.48027948 |
| O  | 25.14897285 | 27.99548024 | 20.87669033 |
| O  | 25.14752018 | 28.01998698 | 18.03397471 |
| O  | 22.31988433 | 29.45064664 | 19.45015316 |
| O  | 26.57346776 | 30.86241123 | 16.59796962 |
| O  | 23.72381841 | 30.83877657 | 16.61494232 |
| Zn | 25.15792867 | 32.22023023 | 16.60061787 |
| Zn | 22.27417203 | 30.86706727 | 20.86537693 |
| Zn | 22.30666570 | 30.86580885 | 18.03246367 |

|    |             |             |             |
|----|-------------|-------------|-------------|
| Zn | 25.17985335 | 29.43348180 | 16.61384192 |
| Zn | 26.56112574 | 28.01617620 | 19.45404595 |
| Zn | 23.73433193 | 28.02635850 | 19.45633426 |
| O  | 22.25333872 | 32.29123458 | 19.44776864 |
| O  | 30.79827918 | 27.92495877 | 20.84965003 |
| O  | 30.79669876 | 27.95102767 | 18.02086379 |
| O  | 27.99019499 | 29.40960266 | 19.43283125 |
| O  | 29.39605487 | 30.77995910 | 16.61402314 |
| Zn | 28.01177047 | 30.88175349 | 20.84919299 |
| Zn | 28.03714899 | 30.88805852 | 18.02148195 |
| Zn | 30.41299404 | 29.27224188 | 16.60975453 |
| Zn | 32.11020167 | 27.53964937 | 19.42932440 |
| Zn | 29.34689291 | 27.99160665 | 19.43682954 |
| O  | 27.90511389 | 32.23530772 | 19.43767256 |
| O  | 8.13335450  | 33.76049665 | 20.96287320 |
| Zn | 9.62116662  | 33.71784377 | 19.88472913 |
| O  | 13.78174465 | 33.72935334 | 20.89410886 |
| O  | 13.74552337 | 33.75679642 | 18.05462981 |
| O  | 10.90081876 | 35.14958817 | 19.51837257 |
| O  | 15.16391103 | 36.61875880 | 16.56431711 |
| O  | 12.34182238 | 36.53046454 | 16.64745804 |
| Zn | 13.63129752 | 37.97746891 | 16.50930552 |
| Zn | 10.74125892 | 36.75038002 | 20.89359079 |
| Zn | 11.31084379 | 36.52537434 | 18.15847011 |
| Zn | 13.72984905 | 35.15261038 | 16.56154309 |
| Zn | 15.18389456 | 33.74084390 | 19.43439375 |
| Zn | 12.38029204 | 33.77554167 | 19.47542481 |
| O  | 10.90988120 | 37.96385742 | 19.40114761 |
| O  | 19.43089247 | 33.71152111 | 20.85169344 |
| O  | 19.44166576 | 33.77236692 | 18.01917404 |
| O  | 16.59310424 | 35.17878028 | 19.40278101 |
| O  | 20.84361797 | 36.63699631 | 16.57709779 |
| O  | 18.01144539 | 36.60277886 | 16.60159036 |
| Zn | 19.42380642 | 38.01682245 | 16.57391616 |
| Zn | 16.57677414 | 36.61279981 | 20.78647170 |
| Zn | 16.55101621 | 36.64098479 | 18.00227663 |
| Zn | 19.46826645 | 35.19435201 | 16.60574810 |
| Zn | 20.85329664 | 33.75299367 | 19.44356689 |
| Zn | 18.01618404 | 33.75615559 | 19.42794384 |
| O  | 16.55150853 | 38.04998270 | 19.43475757 |
| O  | 25.08755610 | 33.66942697 | 20.84101703 |
| O  | 25.09087096 | 33.66588885 | 18.01867609 |
| O  | 22.28293535 | 35.15359901 | 19.42730308 |
| O  | 23.67655466 | 36.47912860 | 16.59605928 |
| Zn | 22.36463775 | 36.67404504 | 20.79537154 |
| Zn | 22.31353476 | 36.62067789 | 17.99173144 |
| Zn | 24.70285502 | 34.97891715 | 16.60325264 |



|    |             |             |             |
|----|-------------|-------------|-------------|
| Zn | 26.40126337 | 33.25812093 | 19.43632909 |
| Zn | 23.63678787 | 33.72585074 | 19.42992801 |
| O  | 22.22465189 | 37.99371754 | 19.38519608 |
| O  | 13.70463368 | 39.37750537 | 20.82299749 |
| O  | 13.69355640 | 39.45744164 | 18.00370290 |
| O  | 15.15658731 | 42.25426781 | 16.56553668 |
| Zn | 14.06800509 | 40.74435298 | 16.57768114 |
| Zn | 15.14632410 | 39.54544720 | 19.49343930 |
| Zn | 12.40737487 | 39.05566761 | 19.41739019 |
| O  | 19.41429820 | 39.35213033 | 20.79395999 |
| O  | 19.38373847 | 39.47296577 | 17.98665993 |
| O  | 16.55023874 | 40.89599305 | 19.41922861 |
| O  | 17.95305216 | 42.26373781 | 16.55706878 |
| Zn | 16.55196626 | 41.95281328 | 17.91122641 |
| Zn | 19.06013186 | 40.78120299 | 16.57256229 |
| Zn | 20.70059324 | 39.01069766 | 19.37884408 |
| Zn | 17.94767182 | 39.55127837 | 19.51898340 |
| Zn | 28.12565632 | 2.72483055  | 26.76643175 |
| O  | 28.12738323 | 3.78163289  | 25.25840969 |
| O  | 21.04185686 | 8.19975037  | 22.41244477 |
| Zn | 19.96005414 | 9.68717344  | 22.42604640 |
| O  | 25.29389244 | 5.20467275  | 26.69098446 |
| O  | 25.26333443 | 5.32550822  | 23.88368630 |
| O  | 22.45297764 | 6.68392503  | 25.29245028 |
| O  | 26.68385776 | 8.13195637  | 22.44580098 |
| O  | 23.85316733 | 8.10176203  | 22.44314185 |
| Zn | 25.23350820 | 9.57148807  | 22.40137247 |
| Zn | 22.36409716 | 8.05695792  | 26.68591836 |
| Zn | 22.31299891 | 8.00360916  | 23.88227475 |
| Zn | 25.26778493 | 6.81180895  | 22.80275392 |
| Zn | 26.72995586 | 5.12634580  | 25.15865805 |
| Zn | 23.97703508 | 5.66694774  | 25.29881251 |
| O  | 22.39470367 | 9.52404902  | 25.25034843 |
| O  | 30.98406848 | 5.22017751  | 26.67393936 |
| O  | 30.97299751 | 5.30011836  | 23.85464657 |
| O  | 28.12612397 | 6.62764047  | 25.24288069 |
| O  | 32.33853751 | 8.07739912  | 22.40795071 |
| O  | 29.50290096 | 8.10495588  | 22.42646844 |
| Zn | 30.95159816 | 9.54525366  | 22.36718822 |
| Zn | 28.12662340 | 8.03664021  | 26.67536298 |
| Zn | 28.10086814 | 8.06482517  | 23.89116866 |
| Zn | 30.91886348 | 6.78684740  | 22.77652532 |
| Zn | 32.27025760 | 5.62195523  | 25.26026921 |
| Zn | 29.53130644 | 5.13217157  | 25.18419481 |
| O  | 28.08454543 | 9.49884534  | 25.27485738 |
| O  | 33.76774212 | 6.71377770  | 25.27650079 |
| O  | 35.15078897 | 8.10398183  | 22.29316991 |

|    |             |             |             |
|----|-------------|-------------|-------------|
| Zn | 36.22640916 | 9.61314902  | 22.31713320 |
| Zn | 33.36679151 | 8.15228170  | 26.51916957 |
| Zn | 33.93641350 | 7.92721641  | 23.78405333 |
| O  | 33.77684393 | 9.52805420  | 25.15928324 |
| O  | 15.31272739 | 13.93662549 | 22.41847386 |
| Zn | 14.28759003 | 15.43798345 | 22.41678574 |
| O  | 19.58677552 | 11.01175957 | 26.65896382 |
| O  | 19.59008826 | 11.00822545 | 23.83662249 |
| O  | 16.77253370 | 12.44234263 | 25.23996464 |
| O  | 20.97930414 | 13.84555385 | 22.39831157 |
| O  | 18.14113651 | 13.82236936 | 22.41111937 |
| Zn | 19.52978674 | 15.25645282 | 22.39187341 |
| Zn | 16.64049266 | 13.78958571 | 26.65615558 |
| Zn | 16.66587610 | 13.79590310 | 23.82844882 |
| Zn | 19.55521978 | 12.44990636 | 22.38607717 |
| Zn | 21.04085999 | 10.95179836 | 25.24771322 |
| Zn | 18.27638443 | 11.41953163 | 25.24131977 |
| O  | 16.68744931 | 15.26804264 | 25.24481324 |
| O  | 25.23598114 | 10.90526697 | 26.65847128 |
| O  | 25.24675805 | 10.96610713 | 23.82595135 |
| O  | 22.42430754 | 12.38640970 | 25.22987041 |
| O  | 26.64259403 | 13.80529683 | 22.36642963 |
| O  | 23.81503029 | 13.79504524 | 22.39222978 |
| Zn | 25.22391457 | 15.22185186 | 22.36170429 |
| Zn | 22.37097753 | 13.81183371 | 26.64517520 |
| Zn | 22.40347100 | 13.81057863 | 23.81226213 |
| Zn | 25.23635381 | 12.37755657 | 22.37683139 |
| Zn | 26.66146524 | 10.92147359 | 25.24969837 |
| Zn | 23.82435170 | 10.92464529 | 25.23407422 |
| O  | 22.35775418 | 15.22699394 | 25.22748588 |
| O  | 30.93213087 | 10.92083892 | 26.62301552 |
| O  | 30.89590298 | 10.94827808 | 23.78353877 |
| O  | 28.07049204 | 12.34480539 | 25.19736653 |
| O  | 32.31605427 | 13.77068263 | 22.29496105 |
| O  | 29.48235979 | 13.76842211 | 22.36390219 |
| Zn | 30.89289318 | 15.18865894 | 22.31291396 |
| Zn | 28.05585424 | 13.77425612 | 26.60424660 |
| Zn | 28.06169851 | 13.76747420 | 23.78039771 |
| Zn | 30.89425033 | 12.34944213 | 22.32187550 |
| Zn | 32.29736402 | 10.90210154 | 25.20221623 |
| Zn | 29.49375715 | 10.93678695 | 25.24325244 |
| O  | 28.02094773 | 15.19193020 | 25.19022928 |
| O  | 36.54430108 | 10.91715432 | 23.71477079 |
| O  | 33.72659456 | 12.36361539 | 25.14710744 |
| O  | 38.00535258 | 13.78893654 | 22.25931045 |
| O  | 35.17614935 | 13.73530676 | 22.32774494 |
| Zn | 36.63050254 | 15.17854660 | 22.33663423 |

|    |             |             |             |
|----|-------------|-------------|-------------|
| Zn | 33.29423274 | 13.77958525 | 26.44403614 |
| Zn | 33.74761608 | 13.76037617 | 23.67981768 |
| Zn | 36.69254038 | 12.36196057 | 22.38537129 |
| Zn | 35.05648747 | 10.95979095 | 24.79291228 |
| O  | 33.67275343 | 15.18871803 | 25.11687755 |
| O  | 9.56231597  | 19.60104224 | 22.45779020 |
| Zn | 8.54668420  | 21.12550464 | 22.45144787 |
| O  | 13.88094464 | 16.72662001 | 26.65677548 |
| O  | 13.87936437 | 16.75268235 | 23.82799173 |
| O  | 11.06191957 | 18.15741428 | 25.25534927 |
| O  | 15.26410294 | 19.57942818 | 22.38114150 |
| O  | 12.40129930 | 19.55080143 | 22.41096501 |
| Zn | 13.80333779 | 20.98002937 | 22.39346160 |
| Zn | 10.91764916 | 19.50903741 | 26.66658767 |
| Zn | 10.93921472 | 19.51335922 | 23.84952130 |
| Zn | 13.82907135 | 18.19824524 | 22.40781854 |
| Zn | 15.33074670 | 16.68603403 | 25.24081214 |
| Zn | 12.56744074 | 17.13799721 | 25.24831300 |
| O  | 10.94382659 | 20.98784819 | 25.25403200 |
| O  | 19.53012308 | 16.65765477 | 26.64365944 |
| O  | 19.52866927 | 16.68216434 | 23.80094348 |
| O  | 16.71334823 | 18.12000174 | 25.21882566 |
| O  | 20.93447932 | 19.51741791 | 22.35302018 |
| O  | 18.09896117 | 19.51805633 | 22.37746667 |
| Zn | 19.51798733 | 20.93648201 | 22.35475285 |
| Zn | 16.66539979 | 19.53384858 | 26.64336003 |
| Zn | 16.68744632 | 19.53850242 | 23.79920632 |
| Zn | 19.51727840 | 18.09675279 | 22.37950512 |
| Zn | 20.94330828 | 16.65128256 | 25.22130038 |
| Zn | 18.11651668 | 16.66147926 | 25.22359039 |
| O  | 16.64396828 | 20.94627809 | 25.22316276 |
| O  | 25.19044125 | 16.60876502 | 26.60647322 |
| O  | 25.18632237 | 16.64708765 | 23.77190058 |
| O  | 22.35975381 | 18.06950794 | 25.19066048 |
| O  | 26.60813408 | 19.48697760 | 22.31788410 |
| O  | 23.77194480 | 19.48513946 | 22.35609370 |
| Zn | 25.18913927 | 20.90469901 | 22.32617967 |
| Zn | 22.31937575 | 19.48616036 | 26.61039242 |
| Zn | 22.35145456 | 19.48850335 | 23.77293755 |
| Zn | 25.19148118 | 18.06724354 | 22.35826153 |
| Zn | 26.60614421 | 16.61313331 | 25.18520388 |
| Zn | 23.77251412 | 16.64775080 | 25.19024411 |
| O  | 22.32154040 | 20.90569501 | 25.19249823 |
| O  | 30.86241177 | 16.59797113 | 26.57346815 |
| O  | 30.83877741 | 16.61494391 | 23.72381880 |
| O  | 28.01998736 | 18.03397563 | 25.14752011 |
| O  | 32.29123471 | 19.44777015 | 22.25333885 |

|    |             |             |             |
|----|-------------|-------------|-------------|
| O  | 29.45064653 | 19.45015439 | 22.31988402 |
| Zn | 30.86706689 | 20.86537826 | 22.27417145 |
| Zn | 28.01617639 | 19.45404693 | 26.56112557 |
| Zn | 28.02635851 | 19.45633515 | 23.73433170 |
| Zn | 30.86580905 | 18.03246520 | 22.30666594 |
| Zn | 32.22023096 | 16.60061937 | 25.15792926 |
| Zn | 29.43348237 | 16.61384303 | 25.17985356 |
| O  | 27.99548032 | 20.87669122 | 25.14897255 |
| O  | 36.47912902 | 16.59606197 | 23.67655412 |
| O  | 33.66588995 | 18.01867745 | 25.09087116 |
| O  | 37.99371777 | 19.38519785 | 22.22465014 |
| O  | 35.15359900 | 19.42730527 | 22.28293468 |
| Zn | 36.67404571 | 20.79537335 | 22.36463676 |
| Zn | 33.25812117 | 19.43633005 | 26.40126323 |
| Zn | 33.72585153 | 19.42992880 | 23.63678779 |
| Zn | 36.62067691 | 17.99173392 | 22.31353375 |
| Zn | 34.97891830 | 16.60325321 | 24.70285556 |
| O  | 33.66942663 | 20.84101828 | 25.08755562 |
| O  | 8.13195650  | 22.44579894 | 26.68386020 |
| O  | 8.10176183  | 22.44314024 | 23.85316941 |
| O  | 5.32550870  | 23.88368422 | 25.26333746 |
| O  | 9.52404902  | 25.25034619 | 22.39470434 |
| O  | 6.68392478  | 25.29244843 | 22.45297943 |
| Zn | 8.05695886  | 26.68591581 | 22.36409818 |
| Zn | 5.12634847  | 25.15865695 | 26.72995866 |
| Zn | 5.66694870  | 25.29880979 | 23.97703760 |
| Zn | 8.00360849  | 23.88227287 | 22.31299993 |
| Zn | 9.57148803  | 22.40137042 | 25.23351033 |
| Zn | 6.81180902  | 22.80275143 | 25.26778734 |
| O  | 5.20467357  | 26.69098210 | 25.29389499 |
| O  | 13.80529716 | 22.36642839 | 26.64259486 |
| O  | 13.79504513 | 22.39222886 | 23.81503124 |
| O  | 10.96610719 | 23.82594938 | 25.24675865 |
| O  | 15.22699405 | 25.22748465 | 22.35775447 |
| O  | 12.38640955 | 25.22986889 | 22.42430739 |
| Zn | 13.81183350 | 26.64517364 | 22.37097727 |
| Zn | 10.92147497 | 25.24969649 | 26.66146556 |
| Zn | 10.92464572 | 25.23407174 | 23.82435199 |
| Zn | 13.81057901 | 23.81226079 | 22.40347156 |
| Zn | 15.22185191 | 22.36170376 | 25.22391526 |
| Zn | 12.37755664 | 22.37682964 | 25.23635495 |
| O  | 10.90526791 | 26.65846895 | 25.23598139 |
| O  | 19.48697780 | 22.31788431 | 26.60813482 |
| O  | 19.48513932 | 22.35609357 | 23.77194542 |
| O  | 16.64708755 | 23.77190014 | 25.18632297 |
| O  | 20.90569519 | 25.19249768 | 22.32154009 |
| O  | 18.06950798 | 25.19065990 | 22.35975396 |

|    |             |             |             |
|----|-------------|-------------|-------------|
| Zn | 19.48616046 | 26.61039178 | 22.31937545 |
| Zn | 16.61313361 | 25.18520362 | 26.60614471 |
| Zn | 16.64775096 | 25.19024334 | 23.77251440 |
| Zn | 19.48850347 | 23.77293707 | 22.35145482 |
| Zn | 20.90469901 | 22.32617994 | 25.18913980 |
| Zn | 18.06724360 | 22.35826129 | 25.19148205 |
| O  | 16.60876555 | 26.60647254 | 25.19044146 |
| O  | 25.15958643 | 22.30016267 | 26.57867756 |
| O  | 25.16022547 | 22.32461459 | 23.74315767 |
| O  | 22.32461454 | 23.74315796 | 25.16022553 |
| O  | 26.57867782 | 25.15958623 | 22.30016188 |
| O  | 23.74315805 | 25.16022556 | 22.32461399 |
| Zn | 25.16036018 | 26.58089305 | 22.29812229 |
| Zn | 22.29812335 | 25.16036000 | 26.58089315 |
| Zn | 22.32288233 | 25.15965067 | 23.74115608 |
| Zn | 25.15965098 | 23.74115633 | 22.32288159 |
| Zn | 26.58089306 | 22.29812311 | 25.16035971 |
| Zn | 23.74115640 | 22.32288208 | 25.15965079 |
| O  | 22.30016314 | 26.57867742 | 25.15958609 |
| O  | 30.85527868 | 22.26651092 | 26.53650687 |
| O  | 30.83209281 | 22.27932765 | 23.69833734 |
| O  | 28.00526959 | 23.71152367 | 25.14255061 |
| O  | 32.27633834 | 25.12684731 | 22.26667847 |
| O  | 29.41353689 | 25.09821191 | 22.29648974 |
| Zn | 30.84856156 | 26.47939651 | 22.26981072 |
| Zn | 28.00163577 | 25.13094534 | 26.56021003 |
| Zn | 27.99293524 | 25.12112961 | 23.71951878 |
| Zn | 30.87429777 | 23.69761056 | 22.28418324 |
| Zn | 32.22774454 | 22.29155217 | 25.12242314 |
| Zn | 29.42119346 | 22.28575852 | 25.14785528 |
| O  | 27.96742694 | 26.54773335 | 25.13534131 |
| O  | 36.47789477 | 22.26520087 | 23.63577664 |
| O  | 33.69958123 | 23.66872641 | 25.07101392 |
| O  | 35.11532448 | 25.07660210 | 22.21984853 |
| Zn | 33.25358993 | 25.06942035 | 26.38891574 |
| Zn | 33.79709104 | 25.20992017 | 23.63218389 |
| Zn | 36.13094821 | 23.55213711 | 22.22618861 |
| Zn | 34.99047278 | 22.25160335 | 24.71757797 |
| O  | 33.60491904 | 26.47973747 | 25.10394527 |
| O  | 2.41389312  | 28.12057574 | 26.72457334 |
| Zn | 3.89644317  | 28.10507303 | 25.61750289 |
| O  | 8.07485640  | 28.07605105 | 26.66619220 |
| O  | 8.04064358  | 28.10054792 | 23.83401833 |
| O  | 5.20377260  | 29.52537658 | 25.28869527 |
| O  | 9.50150021  | 30.94233356 | 22.34988982 |
| O  | 6.67229355  | 30.88871374 | 22.41832997 |
| Zn | 7.98510769  | 32.31568907 | 22.29226694 |

|    |             |             |             |
|----|-------------|-------------|-------------|
| Zn | 5.06491165  | 31.11500874 | 26.66270453 |
| Zn | 5.64740237  | 30.88897565 | 23.93420115 |
| Zn | 8.04713771  | 29.49910023 | 22.34099947 |
| Zn | 9.48328456  | 28.07189208 | 25.20937887 |
| Zn | 6.66081369  | 28.10372349 | 25.25382885 |
| O  | 5.27302426  | 32.33549973 | 25.18150612 |
| O  | 13.76786466 | 28.00618261 | 26.59681735 |
| O  | 13.76102406 | 28.06899706 | 23.77810477 |
| O  | 10.91754960 | 29.48236171 | 25.17778494 |
| O  | 15.19528447 | 30.90921409 | 22.31374235 |
| O  | 12.36158856 | 30.90695148 | 22.38268096 |
| Zn | 13.78339594 | 32.32819084 | 22.35576479 |
| Zn | 10.92022549 | 30.91556798 | 26.55912531 |
| Zn | 10.89659562 | 30.94710384 | 23.77925834 |
| Zn | 13.78475095 | 29.48897579 | 22.36473037 |
| Zn | 15.18942923 | 28.02008794 | 25.18098862 |
| Zn | 12.33659675 | 28.05962202 | 25.18730568 |
| O  | 10.91036042 | 32.34357472 | 25.20870299 |
| O  | 19.45881362 | 27.96429298 | 26.55764213 |
| O  | 19.45447664 | 28.03366286 | 23.73136061 |
| O  | 16.61588700 | 29.43323899 | 25.12590287 |
| O  | 20.86261495 | 30.88258969 | 22.28540998 |
| O  | 18.03505295 | 30.87233408 | 22.31121109 |
| Zn | 19.44129144 | 32.30007350 | 22.30080407 |
| Zn | 16.59899833 | 30.86868617 | 26.50804361 |
| Zn | 16.61787345 | 30.89453180 | 23.72529566 |
| Zn | 19.45373277 | 29.45577915 | 22.31593432 |
| Zn | 20.87842986 | 27.99018873 | 25.13914211 |
| Zn | 18.03427973 | 28.01223187 | 25.14379608 |
| O  | 16.59353858 | 32.28876108 | 25.15268197 |
| O  | 25.13534271 | 27.96742600 | 26.54773273 |
| O  | 25.14255166 | 28.00526968 | 23.71152277 |
| O  | 22.29649117 | 29.41353638 | 25.09821101 |
| O  | 26.53650792 | 30.85527879 | 22.26650961 |
| O  | 23.69833834 | 30.83209295 | 22.27932607 |
| Zn | 25.12242422 | 32.22774466 | 22.29155092 |
| Zn | 22.26981258 | 30.84856088 | 26.47939579 |
| Zn | 22.28418454 | 30.87429686 | 23.69760935 |
| Zn | 25.14785634 | 29.42119352 | 22.28575741 |
| Zn | 26.56021113 | 28.00163545 | 25.13094440 |
| Zn | 23.71952013 | 27.99293469 | 25.12112902 |
| O  | 22.26668065 | 32.27633727 | 25.12684619 |
| O  | 30.83724049 | 27.92781153 | 26.50787517 |
| O  | 30.79720271 | 27.93460103 | 23.67770394 |
| O  | 27.99442609 | 29.39898845 | 25.11479306 |
| O  | 29.36491308 | 30.74101907 | 22.25916866 |
| Zn | 28.06352357 | 30.92671530 | 26.47448248 |

|    |             |             |             |
|----|-------------|-------------|-------------|
| Zn | 28.01318195 | 30.85597111 | 23.67021001 |
| Zn | 30.39005154 | 29.23966140 | 22.26084837 |
| Zn | 32.12102953 | 27.56540153 | 25.08636669 |
| Zn | 29.36037107 | 27.97429176 | 25.13249868 |
| O  | 27.91194512 | 32.23654287 | 25.05950411 |
| O  | 8.09275838  | 33.71614731 | 26.60024107 |
| O  | 8.07400999  | 33.78041593 | 23.78307594 |
| O  | 9.52685692  | 36.57366988 | 22.38447919 |
| Zn | 8.45124840  | 35.06449821 | 22.36051221 |
| Zn | 9.54049424  | 33.86118993 | 25.27318274 |
| Zn | 6.78641689  | 33.40349591 | 25.20233342 |
| O  | 13.78947221 | 33.65027025 | 26.55880363 |
| O  | 13.75547132 | 33.76916973 | 23.73294277 |
| O  | 10.97523047 | 35.16840834 | 25.15048604 |
| O  | 15.17474285 | 36.57266796 | 22.25117272 |
| O  | 12.33910783 | 36.60022150 | 22.26969912 |
| Zn | 13.75878659 | 37.89077602 | 21.90111978 |
| Zn | 10.96547044 | 36.18840940 | 23.63162956 |
| Zn | 13.72603480 | 35.13237405 | 22.31046133 |
| Zn | 15.18683919 | 33.77392218 | 25.19251845 |
| Zn | 12.36222367 | 33.78922190 | 25.22667155 |
| O  | 19.42229472 | 33.61572009 | 26.52022709 |
| O  | 19.42361412 | 33.73380553 | 23.68979129 |
| O  | 16.60422275 | 35.11720478 | 25.05550938 |
| O  | 20.82447150 | 36.57587563 | 22.23449810 |
| O  | 17.99378524 | 36.54567164 | 22.23183746 |
| Zn | 19.40985191 | 37.86581910 | 21.87488096 |
| Zn | 16.59039445 | 36.13954991 | 23.55106738 |
| Zn | 19.44414968 | 35.10614179 | 22.27626484 |
| Zn | 20.82811850 | 33.73842212 | 25.16428195 |
| Zn | 18.01105553 | 33.75998199 | 25.16860062 |
| O  | 25.10394726 | 33.60491782 | 26.47973612 |
| O  | 25.07101618 | 33.69958153 | 23.66872493 |
| O  | 22.21985092 | 35.11532337 | 25.07660025 |
| O  | 23.63577826 | 36.47789533 | 22.26519907 |
| Zn | 22.22619079 | 36.13094754 | 23.55213557 |
| Zn | 24.71757977 | 34.99047359 | 22.25160239 |
| Zn | 26.38891794 | 33.25358979 | 25.06941891 |
| Zn | 23.63218609 | 33.79708945 | 25.20991864 |
| O  | 26.72457032 | 2.41389283  | 28.12057792 |
| Zn | 25.61749982 | 3.89644288  | 28.10507552 |
| O  | 29.52104029 | 2.42335221  | 28.11211071 |
| Zn | 30.60961780 | 3.93327178  | 28.09996529 |
| Zn | 28.12669313 | 2.72220918  | 29.45693554 |
| O  | 28.15072665 | 3.84633738  | 30.93950786 |
| O  | 21.00107999 | 8.19851509  | 28.08158832 |
| Zn | 19.97478165 | 9.69872798  | 28.07438195 |

|    |             |             |             |
|----|-------------|-------------|-------------|
| O  | 25.18150443 | 5.27302255  | 32.33550363 |
| O  | 25.28869430 | 5.20377188  | 29.52538001 |
| O  | 22.41832977 | 6.67229393  | 30.88871614 |
| O  | 26.66619096 | 8.07485516  | 28.07605415 |
| O  | 23.83401750 | 8.04064303  | 28.10055047 |
| Zn | 25.20937805 | 9.48328386  | 28.07189486 |
| Zn | 22.29226680 | 7.98510705  | 32.31569233 |
| Zn | 22.34099901 | 8.04713900  | 29.49910297 |
| Zn | 25.25382764 | 6.66081262  | 28.10372665 |
| Zn | 26.66270327 | 5.06490883  | 31.11501406 |
| Zn | 23.93420040 | 5.64740218  | 30.88897896 |
| O  | 22.34989004 | 9.50150025  | 30.94233711 |
| O  | 30.89748876 | 5.25886905  | 29.48855145 |
| O  | 28.05403599 | 6.67514023  | 30.96215731 |
| O  | 32.33581248 | 8.14715712  | 28.03018086 |
| O  | 29.51372760 | 8.05886946  | 28.11331973 |
| Zn | 30.94778459 | 9.52501796  | 28.11609500 |
| Zn | 27.67952399 | 8.11733506  | 32.22948093 |
| Zn | 28.08654605 | 8.04915579  | 29.47447008 |
| Zn | 31.04634029 | 6.70015069  | 28.16832244 |
| Zn | 29.39659701 | 5.29195835  | 30.56031781 |
| O  | 28.02666933 | 9.51995297  | 30.89435784 |
| O  | 15.28158720 | 13.89768519 | 28.06361132 |
| Zn | 14.26465097 | 15.40540366 | 28.06787908 |
| O  | 19.53053251 | 10.95106046 | 32.31402595 |
| O  | 19.56076229 | 11.00489242 | 29.48892408 |
| O  | 16.72899610 | 12.40520117 | 30.89149859 |
| O  | 20.95382580 | 13.83886868 | 28.06269534 |
| O  | 18.10417722 | 13.81523051 | 28.07967144 |
| Zn | 19.49778533 | 15.24416240 | 28.06379131 |
| Zn | 16.59981936 | 13.73940688 | 32.31982859 |
| Zn | 16.62218056 | 13.76702992 | 29.48688030 |
| Zn | 19.51972129 | 12.45741696 | 28.07702799 |
| Zn | 20.99782379 | 10.93003281 | 30.91725884 |
| Zn | 18.23360231 | 11.38341302 | 30.89804970 |
| O  | 16.64608342 | 15.22688178 | 30.91541224 |
| O  | 25.20870260 | 10.91035898 | 32.34357771 |
| O  | 25.17778516 | 10.91754908 | 29.48236422 |
| O  | 22.38268165 | 12.36158889 | 30.90695318 |
| O  | 26.59681706 | 13.76786422 | 28.00618390 |
| O  | 23.77810490 | 13.76102355 | 28.06899871 |
| Zn | 25.18098866 | 15.18942887 | 28.02008887 |
| Zn | 22.35576461 | 13.78339563 | 32.32819290 |
| Zn | 22.36473070 | 13.78475146 | 29.48897753 |
| Zn | 25.18730571 | 12.33659605 | 28.05962430 |
| Zn | 26.55912504 | 10.92022422 | 30.91557133 |
| Zn | 23.77925856 | 10.89659587 | 30.94710615 |



|    |             |             |             |
|----|-------------|-------------|-------------|
| O  | 22.31374242 | 15.19528466 | 30.90921588 |
| O  | 30.81544386 | 10.95827313 | 29.44282126 |
| O  | 27.98853502 | 12.35735745 | 30.84783961 |
| O  | 32.27244535 | 13.78614245 | 27.94864208 |
| O  | 29.45076306 | 13.76221998 | 28.03156227 |
| Zn | 30.91061234 | 15.19075949 | 28.05546110 |
| Zn | 27.57965871 | 13.78409765 | 32.14581431 |
| Zn | 28.03241110 | 13.76157388 | 29.38704315 |
| Zn | 30.93824830 | 12.35780641 | 28.07783188 |
| Zn | 29.31465751 | 10.94852560 | 30.46850076 |
| O  | 27.96570119 | 15.19172126 | 30.82295045 |
| O  | 9.56043210  | 19.62213439 | 28.07341940 |
| Zn | 8.53807075  | 21.12656791 | 28.08725259 |
| O  | 13.82980670 | 16.68911068 | 32.32027940 |
| O  | 13.85468864 | 16.71193877 | 29.48591766 |
| O  | 11.02737162 | 18.11884438 | 30.88817161 |
| O  | 15.24439859 | 19.55174317 | 28.06175303 |
| O  | 12.38887438 | 19.52496150 | 28.08410752 |
| Zn | 13.78309503 | 20.95234616 | 28.05977383 |
| Zn | 10.88842089 | 19.45097630 | 32.31542057 |
| Zn | 10.90371551 | 19.48512696 | 29.49080326 |
| Zn | 13.80895256 | 18.16959874 | 28.07864331 |
| Zn | 15.29059816 | 16.64522741 | 30.91606128 |
| Zn | 12.53182854 | 17.09798515 | 30.89354423 |
| O  | 10.90845846 | 20.94470370 | 30.92216983 |
| O  | 19.48028021 | 16.60715460 | 32.33282364 |
| O  | 19.48741666 | 16.65669848 | 29.48570164 |
| O  | 16.67145884 | 18.08082680 | 30.90977188 |
| O  | 20.90573921 | 19.49132612 | 28.03054596 |
| O  | 18.07116774 | 19.48720329 | 28.06887034 |
| Zn | 19.48739555 | 20.90512873 | 28.02988932 |
| Zn | 16.61801917 | 19.49034065 | 32.34104255 |
| Zn | 16.65754758 | 19.49665829 | 29.48820709 |
| Zn | 19.49243971 | 18.07150323 | 28.06449689 |
| Zn | 20.89724512 | 16.61594590 | 30.91015597 |
| Zn | 18.07339906 | 16.62180331 | 30.90337332 |
| O  | 16.60863952 | 20.89953891 | 30.91661718 |
| O  | 25.15268158 | 16.59353746 | 32.28876246 |
| O  | 25.12590357 | 16.61588673 | 29.43323991 |
| O  | 22.31121172 | 18.03505322 | 30.87233446 |
| O  | 26.55764215 | 19.45881307 | 27.96429327 |
| O  | 23.73136094 | 19.45447642 | 28.03366344 |
| Zn | 25.13914249 | 20.87842952 | 27.99018905 |
| Zn | 22.30080535 | 19.44129085 | 32.30007469 |
| Zn | 22.31593498 | 19.45373336 | 29.45577994 |
| Zn | 25.14379623 | 18.03427923 | 28.01223260 |
| Zn | 26.50804372 | 16.59899775 | 30.86868828 |

|    |             |             |             |
|----|-------------|-------------|-------------|
| Zn | 23.72529599 | 16.61787360 | 30.89453178 |
| O  | 22.28541121 | 20.86261478 | 30.88259110 |
| O  | 30.77995904 | 16.61402470 | 29.39605539 |
| O  | 27.95102764 | 18.02086538 | 30.79669903 |
| O  | 32.23530774 | 19.43767453 | 27.90511365 |
| O  | 29.40960270 | 19.43283239 | 27.99019487 |
| Zn | 30.88175269 | 20.84919457 | 28.01176933 |
| Zn | 27.53964861 | 19.42932645 | 32.11020125 |
| Zn | 27.99160677 | 19.43683104 | 29.34689282 |
| Zn | 30.88805940 | 18.02148342 | 28.03714959 |
| Zn | 29.27224202 | 16.60975609 | 30.41299491 |
| O  | 27.92495893 | 20.84965171 | 30.79827886 |
| O  | 3.78163345  | 25.25840833 | 28.12738494 |
| Zn | 2.72483097  | 26.76643019 | 28.12566029 |
| O  | 8.07739873  | 22.40795025 | 32.33854060 |
| O  | 8.10495522  | 22.42646723 | 29.50290405 |
| O  | 5.30011737  | 23.85464582 | 30.97300147 |
| O  | 9.49884638  | 25.27485513 | 28.08454594 |
| O  | 6.62764087  | 25.24287858 | 28.12612829 |
| Zn | 8.03664153  | 26.67536015 | 28.12662515 |
| Zn | 5.62195334  | 25.26026945 | 32.27026119 |
| Zn | 5.13216950  | 25.18419326 | 29.53130995 |
| Zn | 8.06482600  | 23.89116671 | 28.10087037 |
| Zn | 9.54525341  | 22.36718746 | 30.95160019 |
| Zn | 6.78684680  | 22.77652509 | 30.91886720 |
| O  | 5.22017539  | 26.67393870 | 30.98407161 |
| O  | 13.77068272 | 22.29495894 | 32.31605502 |
| O  | 13.76842243 | 22.36390147 | 29.48236069 |
| O  | 10.94827827 | 23.78353736 | 30.89590361 |
| O  | 15.19193070 | 25.19022849 | 28.02094817 |
| O  | 12.34480610 | 25.19736527 | 28.07049272 |
| Zn | 13.77425646 | 26.60424561 | 28.05585476 |
| Zn | 10.90210073 | 25.20221441 | 32.29736480 |
| Zn | 10.93678761 | 25.24325115 | 29.49375789 |
| Zn | 13.76747524 | 23.78039668 | 28.06169888 |
| Zn | 15.18865911 | 22.31291294 | 30.89289419 |
| Zn | 12.34944224 | 22.32187400 | 30.89425097 |
| O  | 10.92083851 | 26.62301384 | 30.93213183 |
| O  | 19.44777009 | 22.25333838 | 32.29123534 |
| O  | 19.45015468 | 22.31988450 | 29.45064748 |
| O  | 16.61494392 | 23.72381791 | 30.83877776 |
| O  | 20.87669168 | 25.14897276 | 27.99548067 |
| O  | 18.03397597 | 25.14752026 | 28.01998793 |
| Zn | 19.45404738 | 26.56112571 | 28.01617687 |
| Zn | 16.60061988 | 25.15792810 | 32.22023154 |
| Zn | 16.61384329 | 25.17985285 | 29.43348294 |
| Zn | 19.45633555 | 23.73433199 | 28.02635925 |

|    |             |             |             |
|----|-------------|-------------|-------------|
| Zn | 20.86537838 | 22.27417210 | 30.86706830 |
| Zn | 18.03246520 | 22.30666518 | 30.86580959 |
| O  | 16.59797144 | 26.57346713 | 30.86241248 |
| O  | 25.12684751 | 22.26668033 | 32.27633812 |
| O  | 25.09821178 | 22.29649085 | 29.41353679 |
| O  | 22.27932752 | 23.69833823 | 30.83209356 |
| O  | 26.54773381 | 25.13534193 | 27.96742605 |
| O  | 23.71152378 | 25.14255130 | 28.00526983 |
| Zn | 25.13094568 | 26.56021047 | 28.00163516 |
| Zn | 22.29155234 | 25.12242396 | 32.22774555 |
| Zn | 22.28575872 | 25.14785611 | 29.42119403 |
| Zn | 25.12112985 | 23.71951962 | 27.99293490 |
| Zn | 26.47939660 | 22.26981250 | 30.84856118 |
| Zn | 23.69761057 | 22.28418440 | 30.87429780 |
| O  | 22.26651103 | 26.53650751 | 30.85527954 |
| O  | 30.74101897 | 22.25917031 | 29.36491208 |
| O  | 27.93460116 | 23.67770539 | 30.79720210 |
| O  | 32.23654328 | 25.05950535 | 27.91194307 |
| O  | 29.39898878 | 25.11479451 | 27.99442500 |
| Zn | 30.92671589 | 26.47448375 | 28.06352193 |
| Zn | 27.56540155 | 25.08636810 | 32.12102905 |
| Zn | 27.97429226 | 25.13249977 | 29.36037020 |
| Zn | 30.85597141 | 23.67021145 | 28.01318078 |
| Zn | 29.23966158 | 22.26084987 | 30.39005089 |
| O  | 27.92781211 | 26.50787620 | 30.83723972 |
| O  | 2.42335043  | 28.11210929 | 29.52104379 |
| O  | 3.84633815  | 30.93950474 | 28.15072742 |
| Zn | 2.72220749  | 29.45693389 | 28.12669613 |
| Zn | 3.93327012  | 28.09996521 | 30.60962133 |
| O  | 8.14715667  | 28.03017907 | 32.33581411 |
| O  | 8.05886841  | 28.11331719 | 29.51372938 |
| O  | 5.25886848  | 29.48855041 | 30.89749157 |
| O  | 9.51995375  | 30.89435415 | 28.02666946 |
| O  | 6.67514092  | 30.96215421 | 28.05403790 |
| Zn | 8.11733640  | 32.22947733 | 27.67952497 |
| Zn | 5.29195784  | 30.56031569 | 29.39659899 |
| Zn | 8.04915541  | 29.47446697 | 28.08654752 |
| Zn | 9.52501733  | 28.11609289 | 30.94778580 |
| Zn | 6.70014968  | 28.16832062 | 31.04634273 |
| O  | 13.78614240 | 27.94863973 | 32.27244592 |
| O  | 13.76221954 | 28.03156103 | 29.45076391 |
| O  | 10.95827253 | 29.44281929 | 30.81544495 |
| O  | 15.19172175 | 30.82294845 | 27.96570116 |
| O  | 12.35735773 | 30.84783817 | 27.98853624 |
| Zn | 13.78409814 | 32.14581279 | 27.57966017 |
| Zn | 10.94852558 | 30.46849869 | 29.31465852 |
| Zn | 13.76157397 | 29.38704168 | 28.03241181 |

|    |             |             |             |
|----|-------------|-------------|-------------|
| Zn | 15.19075936 | 28.05546010 | 30.91061299 |
| Zn | 12.35780601 | 28.07783035 | 30.93824953 |
| O  | 19.43767406 | 27.90511294 | 32.23530881 |
| O  | 19.43283312 | 27.99019499 | 29.40960334 |
| O  | 16.61402476 | 29.39605415 | 30.77995910 |
| O  | 20.84965223 | 30.79827881 | 27.92495845 |
| O  | 18.02086612 | 30.79669836 | 27.95102737 |
| Zn | 19.42932652 | 32.11020140 | 27.53964885 |
| Zn | 16.60975727 | 30.41299278 | 29.27224150 |
| Zn | 19.43683205 | 29.34689249 | 27.99160690 |
| Zn | 20.84919456 | 28.01177031 | 30.88175498 |
| Zn | 18.02148368 | 28.03714834 | 30.88805933 |
| O  | 25.05950595 | 27.91194358 | 32.23654262 |
| O  | 25.11479465 | 27.99442541 | 29.39898816 |
| O  | 22.25917054 | 29.36491252 | 30.74101899 |
| O  | 26.50787700 | 30.83723936 | 27.92781036 |
| O  | 23.67770577 | 30.79720170 | 27.93460033 |
| Zn | 25.08636856 | 32.12102837 | 27.56540030 |
| Zn | 22.26085043 | 30.39005061 | 29.23966102 |
| Zn | 25.13250046 | 29.36037009 | 27.97429117 |
| Zn | 26.47448417 | 28.06352275 | 30.92671508 |
| Zn | 23.67021175 | 28.01318112 | 30.85597101 |
| O  | 30.73314913 | 27.94478309 | 29.32682339 |
| O  | 27.94478350 | 29.32682419 | 30.73314772 |
| O  | 29.32682499 | 30.73314870 | 27.94478194 |
| Zn | 27.91554643 | 30.40431045 | 29.23013674 |
| Zn | 30.40431138 | 29.23013779 | 27.91554462 |
| Zn | 29.23013833 | 27.91554546 | 30.40430995 |
| O  | 20.96287250 | 8.13335280  | 33.76049964 |
| Zn | 19.88472911 | 9.62116548  | 33.71784504 |
| O  | 26.60024008 | 8.09275684  | 33.71615093 |
| O  | 23.78307510 | 8.07400760  | 33.78042021 |
| Zn | 25.27318133 | 9.54049258  | 33.86119294 |
| Zn | 22.36051093 | 8.45124495  | 35.06450229 |
| Zn | 25.20233279 | 6.78641457  | 33.40350088 |
| O  | 22.38447795 | 9.52685301  | 36.57367451 |
| O  | 15.23481749 | 13.86219713 | 33.71935987 |
| Zn | 14.20914863 | 15.36298781 | 33.72911897 |
| O  | 19.40114534 | 10.90987655 | 37.96386071 |
| O  | 19.51837203 | 10.90081637 | 35.14959076 |
| O  | 16.64745769 | 12.34181994 | 36.53046655 |
| O  | 20.89410837 | 13.78174292 | 33.72935517 |
| O  | 18.05462962 | 13.74552248 | 33.75679866 |
| Zn | 19.43439421 | 15.18389337 | 33.74084418 |
| Zn | 16.50930414 | 13.63129435 | 37.97747142 |
| Zn | 16.56154300 | 13.72984703 | 35.15261255 |
| Zn | 19.47542367 | 12.38029059 | 33.77554542 |

|    |             |             |             |
|----|-------------|-------------|-------------|
| Zn | 20.89358910 | 10.74125434 | 36.75038447 |
| Zn | 18.15846932 | 11.31084051 | 36.52537654 |
| O  | 16.56431684 | 15.16390830 | 36.61876157 |
| O  | 25.15048340 | 10.97522872 | 35.16841121 |
| O  | 22.26969691 | 12.33910476 | 36.60022379 |
| O  | 26.55880229 | 13.78947071 | 33.65027186 |
| O  | 23.73294188 | 13.75547023 | 33.76917231 |
| Zn | 25.19251759 | 15.18683800 | 33.77392382 |
| Zn | 21.90111693 | 13.75878286 | 37.89077842 |
| Zn | 22.31046008 | 13.72603292 | 35.13237642 |
| Zn | 25.22667002 | 12.36222216 | 33.78922512 |
| Zn | 23.63162763 | 10.96546702 | 36.18841362 |
| O  | 22.25117160 | 15.17473996 | 36.57267089 |
| O  | 9.50923259  | 19.52717002 | 33.70241590 |
| Zn | 8.48923028  | 21.04602540 | 33.71216705 |
| O  | 13.71547723 | 16.62359618 | 38.00248995 |
| O  | 13.78328452 | 16.65097409 | 35.15768134 |
| O  | 10.96149289 | 18.07740441 | 36.58487891 |
| O  | 15.19528280 | 19.49985817 | 33.76009225 |
| O  | 12.33406305 | 19.46894615 | 33.76727972 |
| Zn | 13.73053329 | 20.89838436 | 33.78104496 |
| Zn | 11.27414986 | 19.47529646 | 37.89122909 |
| Zn | 10.81644756 | 19.40448282 | 35.13715209 |
| Zn | 13.76207168 | 18.11852177 | 33.75741615 |
| Zn | 15.20316789 | 16.59109212 | 36.62848390 |
| Zn | 12.44816217 | 16.99812032 | 36.56028946 |
| O  | 10.89722272 | 20.89456496 | 36.60364851 |
| O  | 19.43475621 | 16.55150440 | 38.04998393 |
| O  | 19.40278115 | 16.59310308 | 35.17878075 |
| O  | 16.60159035 | 18.01144299 | 36.60278055 |
| O  | 20.85169480 | 19.43089105 | 33.71152212 |
| O  | 18.01917542 | 19.44166481 | 33.77236802 |
| Zn | 19.44356893 | 20.85329544 | 33.75299267 |
| Zn | 16.57391453 | 19.42380427 | 38.01682430 |
| Zn | 16.60574957 | 19.46826358 | 35.19435347 |
| Zn | 19.42794511 | 18.01618309 | 33.75615564 |
| Zn | 20.78647088 | 16.57677210 | 36.61280129 |
| Zn | 18.00227658 | 16.55101373 | 36.64098429 |
| O  | 16.57709841 | 20.84361531 | 36.63699758 |
| O  | 25.05550810 | 16.60422159 | 35.11720641 |
| O  | 22.23183696 | 17.99378264 | 36.54567347 |
| O  | 26.52022703 | 19.42229350 | 33.61572016 |
| O  | 23.68979171 | 19.42361346 | 33.73380721 |
| Zn | 25.16428235 | 20.82811782 | 33.73842195 |
| Zn | 21.87487991 | 19.40984889 | 37.86582162 |
| Zn | 22.27626553 | 19.44414728 | 35.10614391 |
| Zn | 25.16860066 | 18.01105443 | 33.75998377 |

|    |             |             |             |
|----|-------------|-------------|-------------|
| Zn | 23.55106673 | 16.59039094 | 36.13955269 |
| O  | 22.23449909 | 20.82446858 | 36.57587851 |
| O  | 8.10397824  | 22.29316902 | 35.15079292 |
| O  | 9.52805356  | 25.15928090 | 33.77684498 |
| O  | 6.71377668  | 25.27650075 | 33.76774514 |
| Zn | 8.15228246  | 26.51916757 | 33.36679291 |
| Zn | 7.92721314  | 23.78405232 | 33.93641760 |
| Zn | 9.61314521  | 22.31713345 | 36.22641386 |
| O  | 13.78893431 | 22.25930795 | 38.00535311 |
| O  | 13.73530499 | 22.32774309 | 35.17615010 |
| O  | 10.91715257 | 23.71476996 | 36.54430283 |
| O  | 15.18871774 | 25.11687525 | 33.67275348 |
| O  | 12.36361472 | 25.14710535 | 33.72659535 |
| Zn | 13.77958517 | 26.44403344 | 33.29423288 |
| Zn | 10.95979039 | 24.79291046 | 35.05648845 |
| Zn | 13.76037554 | 23.67981561 | 33.74761672 |
| Zn | 15.17854486 | 22.33663237 | 36.63050342 |
| Zn | 12.36195845 | 22.38536953 | 36.69254062 |
| O  | 19.38519587 | 22.22464774 | 37.99371750 |
| O  | 19.42730525 | 22.28293346 | 35.15359912 |
| O  | 16.59606070 | 23.67655164 | 36.47912885 |
| O  | 20.84101846 | 25.08755520 | 33.66942768 |
| O  | 18.01867740 | 25.09087021 | 33.66589095 |
| Zn | 19.43632992 | 26.40126256 | 33.25812245 |
| Zn | 16.60325278 | 24.70285381 | 34.97891870 |
| Zn | 19.42992955 | 23.63678716 | 33.72585234 |
| Zn | 20.79537260 | 22.36463526 | 36.67404722 |
| Zn | 17.99173303 | 22.31353125 | 36.62067518 |
| O  | 25.07660084 | 22.21984951 | 35.11532425 |
| O  | 22.26519986 | 23.63577546 | 36.47789536 |
| O  | 26.47973774 | 25.10394641 | 33.60491881 |
| O  | 23.66872648 | 25.07101526 | 33.69958246 |
| Zn | 25.06942036 | 26.38891692 | 33.25359043 |
| Zn | 22.25160398 | 24.71757737 | 34.99047395 |
| Zn | 25.20992036 | 23.63218529 | 33.79709168 |
| Zn | 23.55213631 | 22.22618723 | 36.13094877 |
| O  | 15.18908581 | 13.78015022 | 39.41875945 |
| Zn | 14.11732274 | 15.28104340 | 39.38566607 |
| O  | 20.82299448 | 13.70462960 | 39.37750770 |
| O  | 18.00370017 | 13.69355142 | 39.45744562 |
| Zn | 19.49343607 | 15.14632001 | 39.54544901 |
| Zn | 16.57767823 | 14.06800156 | 40.74435605 |
| Zn | 19.41738739 | 12.40736957 | 39.05567214 |
| O  | 16.56553247 | 15.15658316 | 42.25427150 |
| O  | 13.73814568 | 16.52690428 | 40.83129868 |
| O  | 15.15226099 | 19.38893625 | 39.47386836 |
| O  | 12.34213843 | 19.49613479 | 39.40462857 |

|    |             |             |             |
|----|-------------|-------------|-------------|
| Zn | 13.78865698 | 20.74343833 | 39.03024671 |
| Zn | 13.56263095 | 18.01494119 | 39.61275290 |
| Zn | 15.22070086 | 16.55091958 | 41.95544854 |
| O  | 19.41922349 | 16.55023518 | 40.89599406 |
| O  | 16.55706486 | 17.95304859 | 42.26374091 |
| O  | 20.79395716 | 19.41429402 | 39.35213142 |
| O  | 17.98665717 | 19.38373549 | 39.47296866 |
| Zn | 19.37884131 | 20.70058962 | 39.01069853 |
| Zn | 16.57255895 | 19.06012820 | 40.78120595 |
| Zn | 19.51897954 | 17.94766826 | 39.55127906 |
| Zn | 17.91122181 | 16.55196234 | 41.95281502 |

**BCT-24**

|    |            |            |            |
|----|------------|------------|------------|
| O  | 6.06642131 | 0.84621593 | 2.56467427 |
| O  | 4.93743115 | 3.65536388 | 0.93900328 |
| Zn | 8.32130962 | 3.59461214 | 3.12749623 |
| Zn | 5.21165130 | 2.43141799 | 2.33203475 |
| O  | 2.25269568 | 5.14304899 | 2.55629227 |
| O  | 2.77858247 | 8.45803393 | 2.52431656 |
| Zn | 1.55234099 | 6.87409677 | 2.80342431 |
| Zn | 3.58797631 | 4.96218353 | 1.24706655 |
| O  | 7.51613445 | 5.11870710 | 2.62541542 |
| O  | 4.88197580 | 6.47791547 | 0.94157537 |
| Zn | 4.39877191 | 7.48820615 | 2.46177581 |
| Zn | 6.19647851 | 5.14355581 | 1.26783187 |
| O  | 6.64954395 | 1.44574679 | 5.90237633 |
| O  | 4.82529294 | 3.62033318 | 4.13354116 |
| O  | 8.81280432 | 2.20020611 | 4.12798247 |
| Zn | 8.32092035 | 2.84646728 | 5.90247378 |
| Zn | 5.36674338 | 2.96032638 | 5.90241460 |
| Zn | 7.05495354 | 1.06614022 | 4.05917045 |
| O  | 2.62174243 | 5.63123128 | 5.90243008 |
| O  | 3.24806298 | 9.04144704 | 5.90241238 |
| O  | 0.66047684 | 7.69085341 | 4.26398519 |
| Zn | 1.00142589 | 6.81065123 | 5.90245193 |
| Zn | 2.27088912 | 8.90917912 | 4.29710335 |
| Zn | 3.34838180 | 4.91918620 | 4.21298561 |
| O  | 7.12702320 | 4.50585435 | 5.90240758 |
| O  | 4.90997249 | 6.62947430 | 4.19475456 |
| Zn | 4.21306310 | 7.29678621 | 5.90248964 |
| Zn | 6.28204748 | 5.23740173 | 4.27371773 |
| O  | 6.06643398 | 0.84626673 | 9.24001904 |
| O  | 4.82535344 | 3.62037628 | 7.67129386 |
| O  | 8.81320236 | 2.19986399 | 7.67683538 |
| Zn | 8.32109780 | 3.59472470 | 8.67714746 |
| Zn | 5.21173135 | 2.43148015 | 9.47277058 |

|    |            |            |             |
|----|------------|------------|-------------|
| Zn | 7.05500077 | 1.06623061 | 7.74554614  |
| O  | 2.25267980 | 5.14296571 | 9.24850833  |
| O  | 2.77868750 | 8.45792101 | 9.28055112  |
| O  | 0.66054413 | 7.69084440 | 7.54093550  |
| Zn | 1.55209628 | 6.87389462 | 9.00137461  |
| Zn | 2.27092474 | 8.90922310 | 7.50773522  |
| Zn | 3.34840088 | 4.91916439 | 7.59184775  |
| O  | 7.51615777 | 5.11905535 | 9.17940517  |
| O  | 4.90993663 | 6.62955883 | 7.61020709  |
| Zn | 4.39946761 | 7.48847588 | 9.34303623  |
| Zn | 6.28204139 | 5.23748516 | 7.53111303  |
| O  | 4.93749926 | 3.65543203 | 10.86575623 |
| Zn | 3.58801168 | 4.96222719 | 10.55769946 |
| O  | 4.88194082 | 6.47804025 | 10.86308175 |
| Zn | 6.19647853 | 5.14370807 | 10.53695152 |

**BCT-36**

|    |            |             |            |
|----|------------|-------------|------------|
| O  | 7.19857565 | 1.83042844  | 2.41910292 |
| O  | 5.07291853 | 3.95583940  | 0.75965417 |
| Zn | 8.54925636 | 3.28818220  | 2.49153761 |
| Zn | 5.69782673 | 3.05537439  | 2.35979560 |
| O  | 2.32533278 | 4.96195376  | 2.50791744 |
| O  | 3.32491416 | 9.41373284  | 2.84250368 |
| Zn | 1.26859852 | 6.28021810  | 3.08182912 |
| Zn | 3.75885346 | 5.22654122  | 1.27713070 |
| O  | 9.98777351 | 4.64458900  | 2.37893260 |
| O  | 6.13631908 | 9.08978591  | 2.70720555 |
| O  | 7.10161142 | 4.76656706  | 2.66452947 |
| O  | 7.85146103 | 6.71723174  | 0.70903599 |
| O  | 4.84184624 | 6.86177833  | 1.05795547 |
| Zn | 4.41129506 | 7.78057000  | 2.70429481 |
| Zn | 8.72149696 | 6.16540366  | 2.43669713 |
| Zn | 4.78235356 | 10.55389162 | 3.33869229 |
| Zn | 6.40805297 | 5.38862749  | 0.82962758 |
| Zn | 6.67528666 | 8.02953158  | 1.25820234 |
| O  | 6.65928486 | 1.31358334  | 5.90241739 |
| O  | 4.81378776 | 3.51015649  | 4.20758843 |
| O  | 9.17826135 | 2.65029664  | 4.35085420 |
| Zn | 8.45902080 | 3.54774377  | 5.90229914 |
| Zn | 5.29521985 | 2.71504481  | 5.90239268 |
| Zn | 7.55107751 | 1.45556665  | 4.22948864 |
| O  | 2.20761049 | 5.13736326  | 5.90248208 |
| O  | 2.68432972 | 8.50785535  | 5.90242150 |
| O  | 0.61377423 | 7.57995769  | 4.13196446 |
| Zn | 1.32294962 | 6.86943644  | 5.90241385 |
| Zn | 2.07226064 | 8.90195997  | 4.09806323 |



|    |             |             |             |
|----|-------------|-------------|-------------|
| Zn | 3.32385766  | 4.79703529  | 4.33358396  |
| O  | 10.35415290 | 5.08643588  | 5.90229871  |
| O  | 6.14502537  | 8.81261875  | 5.90250273  |
| O  | 7.18219886  | 5.01356000  | 5.90235971  |
| O  | 8.53671372  | 7.21907736  | 4.12266797  |
| O  | 5.38436986  | 12.05465613 | 4.13109642  |
| O  | 4.58787611  | 6.51517312  | 4.25063799  |
| Zn | 4.52417524  | 7.66002133  | 5.90240419  |
| Zn | 8.85337485  | 6.48809590  | 5.90238080  |
| Zn | 5.38591789  | 11.95002097 | 5.90259822  |
| Zn | 6.15556804  | 5.28243382  | 4.25527514  |
| Zn | 10.40630057 | 4.33795111  | 4.16907604  |
| Zn | 7.10951843  | 8.45362841  | 4.28302021  |
| O  | 7.19852116  | 1.83037497  | 9.38566281  |
| O  | 4.81401259  | 3.51019503  | 7.59723114  |
| O  | 9.17820584  | 2.65051471  | 7.45389742  |
| Zn | 8.54939400  | 3.28825156  | 9.31333733  |
| Zn | 5.69788226  | 3.05532925  | 9.44512931  |
| Zn | 7.55110972  | 1.45567075  | 7.57536235  |
| O  | 2.32531928  | 4.96186079  | 9.29685885  |
| O  | 3.32500280  | 9.41384287  | 8.96229720  |
| O  | 0.61379339  | 7.57988128  | 7.67280923  |
| Zn | 1.26857452  | 6.28006497  | 8.72288739  |
| Zn | 2.07228115  | 8.90194495  | 7.70675049  |
| Zn | 3.32401971  | 4.79707333  | 7.47129039  |
| O  | 9.98791162  | 4.64466705  | 9.42590906  |
| O  | 6.13630737  | 9.08974720  | 9.09767713  |
| O  | 7.10167462  | 4.76658856  | 9.14036903  |
| O  | 8.53672448  | 7.21899453  | 7.68219088  |
| O  | 5.38465192  | 12.05486824 | 7.67370228  |
| O  | 4.58802086  | 6.51516511  | 7.55420803  |
| Zn | 4.41135710  | 7.78070806  | 9.10038999  |
| Zn | 8.72156723  | 6.16538562  | 9.36823715  |
| Zn | 4.78246938  | 10.55391458 | 8.46593164  |
| Zn | 6.15578467  | 5.28245356  | 7.54957970  |
| Zn | 10.40616149 | 4.33781677  | 7.63566378  |
| Zn | 7.10960187  | 8.45355739  | 7.52186486  |
| O  | 5.07273775  | 3.95574766  | 11.04518135 |
| Zn | 3.75889779  | 5.22664874  | 10.52772838 |
| O  | 7.85160738  | 6.71743921  | 11.09583696 |
| O  | 4.84196889  | 6.86187806  | 10.74668124 |
| Zn | 6.40803510  | 5.38859581  | 10.97520603 |
| Zn | 6.67532312  | 8.02972412  | 10.54650844 |

**BCT-81**

|   |             |            |            |
|---|-------------|------------|------------|
| O | 11.28760424 | 5.60944417 | 2.35350468 |
|---|-------------|------------|------------|

|    |             |             |             |
|----|-------------|-------------|-------------|
| O  | 6.50340561  | 8.92646656  | 2.39803652  |
| O  | 11.22316425 | 8.48675649  | 2.55516535  |
| O  | 9.21943510  | 7.71939886  | 0.60676274  |
| O  | 9.00675063  | 10.63598555 | 0.94333004  |
| Zn | 8.39653694  | 11.39424647 | 2.58954149  |
| Zn | 9.81248619  | 6.81438906  | 2.24921179  |
| Zn | 5.45830851  | 10.22697828 | 3.02913178  |
| Zn | 10.58156402 | 9.12323118  | 0.72041899  |
| Zn | 7.91208300  | 8.96192336  | 1.11764835  |
| O  | 10.60714315 | 5.01307909  | 5.73103094  |
| O  | 6.45894859  | 9.11961346  | 5.80619580  |
| O  | 11.21577633 | 8.32796425  | 5.79588148  |
| O  | 8.88655365  | 7.31820985  | 4.04163641  |
| O  | 4.75081459  | 11.38983218 | 4.19862784  |
| O  | 8.82319266  | 10.30966811 | 4.17119716  |
| Zn | 8.52746138  | 11.33856231 | 5.79660813  |
| Zn | 9.57261566  | 6.63186320  | 5.75356913  |
| Zn | 5.20701920  | 10.54817682 | 5.94875602  |
| Zn | 10.32353687 | 8.99416220  | 4.16499026  |
| Zn | 11.56823971 | 4.77798423  | 4.03208030  |
| Zn | 7.46104997  | 8.59493092  | 4.22733943  |
| O  | 10.76481661 | 5.39541954  | 9.18610091  |
| O  | 6.79778787  | 9.43905448  | 9.18605815  |
| O  | 11.31130701 | 8.41067027  | 9.18565845  |
| O  | 8.86626491  | 7.42062596  | 7.44652220  |
| O  | 4.74364762  | 11.48033300 | 7.53121361  |
| O  | 9.03238213  | 10.42226176 | 7.46648937  |
| Zn | 8.37692300  | 11.19261301 | 9.18572762  |
| Zn | 9.39969599  | 6.76666346  | 9.18599516  |
| Zn | 5.37218765  | 10.72764168 | 9.18615997  |
| Zn | 10.48314418 | 9.02361862  | 7.48227266  |
| Zn | 11.37150152 | 4.71265727  | 7.46568215  |
| Zn | 7.47692906  | 8.81002711  | 7.44958632  |
| O  | 10.60776584 | 5.01366532  | 12.64125297 |
| O  | 6.45996740  | 9.12056216  | 12.56614389 |
| O  | 11.21643943 | 8.32847749  | 12.57548615 |
| O  | 8.86668986  | 7.42096661  | 10.92546987 |
| O  | 4.74401709  | 11.48069936 | 10.84105984 |
| O  | 9.03286695  | 10.42266528 | 10.90496842 |
| Zn | 8.52811465  | 11.33916025 | 12.57481142 |
| Zn | 9.57350727  | 6.63270707  | 12.61858671 |
| Zn | 5.20784674  | 10.54896160 | 12.42362218 |
| Zn | 10.48350940 | 9.02388847  | 10.88912263 |
| Zn | 11.37187283 | 4.71290602  | 10.90654503 |
| Zn | 7.47737332  | 8.81039365  | 10.92247273 |
| O  | 11.28936390 | 5.61101551  | 16.01858265 |
| O  | 6.50500159  | 8.92792046  | 15.97421319 |

|    |             |             |             |
|----|-------------|-------------|-------------|
| O  | 11.22452561 | 8.48791646  | 15.81641930 |
| O  | 8.88766804  | 7.31924881  | 14.33049722 |
| O  | 4.75180048  | 11.39079872 | 14.17369700 |
| O  | 8.82446599  | 10.31073368 | 14.20045214 |
| Zn | 8.39787762  | 11.39543394 | 15.78207814 |
| Zn | 9.81395374  | 6.81587099  | 16.12277376 |
| Zn | 5.45964161  | 10.22813979 | 15.34318013 |
| Zn | 10.32483388 | 8.99532080  | 14.20647057 |
| Zn | 11.56926319 | 4.77879096  | 14.33990768 |
| Zn | 7.46238938  | 8.59602762  | 14.14481066 |
| O  | 14.03816884 | 8.42945515  | 2.48008670  |
| O  | 11.97481056 | 10.50132427 | 0.66611904  |
| Zn | 12.68431680 | 7.00896671  | 2.63198710  |
| Zn | 12.79170439 | 9.90209788  | 2.39809000  |
| O  | 12.85600528 | 3.14717257  | 4.24655496  |
| Zn | 12.49881669 | 2.67719334  | 5.93572837  |
| O  | 14.20124506 | 8.70832953  | 5.77248829  |
| O  | 15.73614509 | 4.52003916  | 5.83658573  |
| O  | 16.90315392 | 7.61724766  | 4.41355850  |
| O  | 12.38613211 | 10.92750010 | 4.08153615  |
| O  | 13.35571205 | 6.05252536  | 4.28853589  |
| Zn | 12.83722240 | 7.13717848  | 5.81931277  |
| Zn | 16.53876526 | 6.17144552  | 5.40130639  |
| Zn | 12.81157015 | 10.07131730 | 5.75074776  |
| Zn | 14.29413675 | 4.39380122  | 4.63670618  |
| Zn | 15.25790085 | 8.16420925  | 3.84299012  |
| O  | 12.12837654 | 2.82262118  | 7.67363284  |
| Zn | 13.28468945 | 3.06060310  | 9.18600134  |
| O  | 14.47879054 | 8.89435677  | 9.18527264  |
| O  | 14.88614550 | 4.07273358  | 9.18572003  |
| O  | 16.27733808 | 6.78466093  | 7.45311873  |
| O  | 12.16293453 | 10.71975857 | 7.49126569  |
| O  | 13.11891295 | 6.05484424  | 7.47751947  |
| Zn | 12.47121011 | 6.80027375  | 9.18573425  |
| Zn | 16.71181246 | 6.73069282  | 9.18529222  |
| Zn | 12.82352152 | 9.95967900  | 9.18540616  |
| Zn | 14.88679388 | 5.07982510  | 7.52531381  |
| Zn | 15.01000478 | 8.32663254  | 7.42842476  |
| O  | 12.12872782 | 2.82287558  | 10.69866158 |
| Zn | 12.49953529 | 2.67768030  | 12.43650711 |
| O  | 14.20190984 | 8.70895841  | 12.59815941 |
| O  | 15.73670852 | 4.52055724  | 12.53463526 |
| O  | 16.27771221 | 6.78489759  | 10.91759162 |
| O  | 12.16324226 | 10.72005533 | 10.87957013 |
| O  | 13.11929117 | 6.05518259  | 10.89399573 |
| Zn | 12.83781156 | 7.13768003  | 12.55210800 |
| Zn | 16.53942744 | 6.17201622  | 12.96946959 |

|    |             |             |             |
|----|-------------|-------------|-------------|
| Zn | 12.81223752 | 10.07197691 | 12.62005364 |
| Zn | 14.88711158 | 5.08016789  | 10.84593818 |
| Zn | 15.01034793 | 8.32681955  | 10.94209650 |
| O  | 12.85695173 | 3.14791636  | 14.12554267 |
| O  | 14.03958191 | 8.43043454  | 15.89085533 |
| O  | 16.90410717 | 7.61798329  | 13.95687014 |
| O  | 12.38645148 | 10.92780676 | 14.28934204 |
| O  | 13.35679951 | 6.05334324  | 14.08291375 |
| Zn | 12.68559914 | 7.00997839  | 15.73944180 |
| Zn | 12.79319723 | 9.90309955  | 15.97293211 |
| Zn | 14.29494560 | 4.39451514  | 13.73485572 |
| Zn | 15.25890128 | 8.16499424  | 14.52752059 |
| O  | 10.36608470 | 13.02488179 | 2.56230908  |
| O  | 7.33756735  | 12.98333409 | 2.64862334  |
| Zn | 8.83609257  | 14.12496716 | 2.99802161  |
| Zn | 10.74306326 | 11.78364919 | 1.19024001  |
| O  | 2.15667711  | 12.34499469 | 5.95644965  |
| Zn | 3.30637913  | 13.00264501 | 4.75970760  |
| O  | 10.17861347 | 12.78357383 | 5.84116331  |
| O  | 6.08880407  | 16.91752010 | 5.77094550  |
| O  | 7.20849812  | 12.81098590 | 5.77798289  |
| O  | 8.97270461  | 15.44001747 | 4.34621747  |
| O  | 4.52172614  | 14.24885991 | 4.06948648  |
| Zn | 4.90998521  | 15.39569557 | 5.50641125  |
| Zn | 8.84781845  | 14.21378913 | 6.02883269  |
| Zn | 6.08969321  | 13.04773802 | 4.09751749  |
| Zn | 11.12209791 | 12.30155910 | 4.21435072  |
| Zn | 7.56916608  | 16.40124229 | 4.90962893  |
| O  | 2.95519057  | 13.65241437 | 9.18605885  |
| Zn | 2.97109306  | 12.76720510 | 7.54391775  |
| O  | 10.03313565 | 12.81264613 | 9.18541683  |
| O  | 5.52531908  | 16.63914246 | 9.18552348  |
| O  | 7.08203609  | 12.70516130 | 9.18573548  |
| O  | 8.23910603  | 15.22659033 | 7.53134671  |
| O  | 4.96496545  | 14.58963273 | 7.27169817  |
| Zn | 4.32013408  | 15.05593766 | 9.18576263  |
| Zn | 8.62465851  | 14.25636787 | 9.18544613  |
| Zn | 6.14590103  | 13.03834252 | 7.45040711  |
| Zn | 10.80708649 | 12.07001799 | 7.57346022  |
| Zn | 6.51848127  | 16.16383599 | 7.64421134  |
| O  | 2.15737842  | 12.34580523 | 12.41617611 |
| Zn | 2.97163083  | 12.76772934 | 10.82849554 |
| O  | 10.17927444 | 12.78428041 | 12.52970836 |
| O  | 6.08945044  | 16.91811162 | 12.59995342 |
| O  | 7.20912527  | 12.81160906 | 12.59346112 |
| O  | 8.23926625  | 15.22681597 | 10.83946957 |
| O  | 4.96512897  | 14.58992613 | 11.09985774 |

|    |             |             |             |
|----|-------------|-------------|-------------|
| Zn | 4.91066593  | 15.39635841 | 12.86499816 |
| Zn | 8.84842288  | 14.21435361 | 12.34206143 |
| Zn | 6.14627948  | 13.03876275 | 10.92119398 |
| Zn | 10.80729179 | 12.07028663 | 10.79744826 |
| Zn | 6.51870197  | 16.16418530 | 10.72674341 |
| Zn | 3.30734776  | 13.00353824 | 13.61260893 |
| O  | 10.36752370 | 13.02622275 | 15.80857007 |
| O  | 7.33886842  | 12.98450562 | 15.72283155 |
| O  | 8.97358041  | 15.44086635 | 14.02445740 |
| O  | 4.52286161  | 14.24987156 | 14.30232251 |
| Zn | 8.83735623  | 14.12606849 | 15.37295616 |
| Zn | 6.09075883  | 13.04869499 | 14.27415350 |
| Zn | 11.12294644 | 12.30238278 | 14.15645397 |
| Zn | 7.56995742  | 16.40201008 | 13.46109482 |
| O  | 9.22123376  | 7.72097235  | 17.76533790 |
| O  | 9.00846440  | 10.63750002 | 17.42827637 |
| Zn | 10.58327691 | 9.12484697  | 17.65116129 |
| Zn | 7.91373812  | 8.96336942  | 17.25444461 |
| O  | 11.97661822 | 10.50288924 | 17.70482962 |
| Zn | 10.74471607 | 11.78509999 | 17.18073118 |

**BCT-108**

|    |             |             |             |
|----|-------------|-------------|-------------|
| Zn | 35.70785699 | 30.57494646 | 51.21612718 |
| O  | 30.37342300 | 35.67579431 | 50.91883808 |
| O  | 37.23649706 | 31.68069733 | 51.00174211 |
| O  | 33.44497608 | 36.43306159 | 51.04662174 |
| O  | 34.11008193 | 31.47684567 | 50.74464021 |
| O  | 37.90415063 | 34.93295068 | 51.07319449 |
| O  | 35.72675467 | 34.22363276 | 49.30922498 |
| O  | 35.62594197 | 37.16615361 | 49.29624547 |
| O  | 32.83393188 | 34.21921297 | 49.15769303 |
| Zn | 34.78507763 | 37.91717566 | 50.93765835 |
| Zn | 31.72480269 | 34.29976451 | 50.73353352 |
| Zn | 36.51010595 | 33.46684154 | 51.00878657 |
| Zn | 31.62403245 | 37.01879600 | 51.33998017 |
| Zn | 34.14002275 | 32.90558706 | 49.53178507 |
| Zn | 37.08882336 | 35.70324235 | 49.33984538 |
| Zn | 34.22764492 | 35.61841754 | 49.36823919 |
| O  | 38.34345883 | 27.62754620 | 54.25179004 |
| O  | 35.69801157 | 29.18201554 | 52.53539937 |
| Zn | 35.61030739 | 30.23910222 | 54.31151114 |
| Zn | 37.10024664 | 28.23158632 | 53.08609180 |
| O  | 30.26796521 | 35.72070769 | 54.15030931 |
| O  | 27.60540753 | 36.96473138 | 52.58386043 |
| Zn | 27.91492211 | 37.95916221 | 54.09357327 |
| Zn | 29.11531989 | 36.03735061 | 52.27336453 |

|    |             |             |             |
|----|-------------|-------------|-------------|
| O  | 37.25095658 | 31.61909622 | 54.23606235 |
| O  | 33.19820776 | 35.88736154 | 54.23761672 |
| O  | 34.30245692 | 31.68075606 | 54.22318726 |
| O  | 38.19812815 | 35.42885876 | 54.27441168 |
| O  | 35.27988352 | 33.89197926 | 52.54800650 |
| O  | 31.57519089 | 38.39934823 | 52.64445868 |
| O  | 35.77295678 | 37.14650018 | 52.60487108 |
| O  | 32.07367854 | 33.45618145 | 52.42470103 |
| Zn | 35.42633148 | 38.18208781 | 54.22893076 |
| Zn | 31.67877426 | 34.29348264 | 54.12251429 |
| Zn | 35.91192205 | 33.12054284 | 54.23632624 |
| Zn | 31.68092077 | 37.19143636 | 54.26478948 |
| Zn | 33.65620095 | 32.39903509 | 52.45470603 |
| Zn | 37.42442459 | 36.09310933 | 52.60628482 |
| Zn | 38.36159340 | 31.47364516 | 52.52449438 |
| Zn | 34.30966152 | 35.59106057 | 52.65888856 |
| O  | 38.46080433 | 27.70104065 | 57.52357382 |
| O  | 35.91648409 | 29.14113230 | 55.86934849 |
| Zn | 35.70938735 | 30.16959778 | 57.52252234 |
| Zn | 37.42958267 | 28.01718203 | 55.96620483 |
| O  | 30.25398374 | 35.70383953 | 57.52231897 |
| O  | 27.84509686 | 37.19738626 | 55.87924049 |
| Zn | 27.98403912 | 38.12303249 | 57.52292680 |
| Zn | 29.32752801 | 36.02415662 | 55.80694436 |
| O  | 37.26888002 | 31.64243914 | 57.52327917 |
| O  | 33.17969250 | 35.85159749 | 57.52326506 |
| O  | 34.32556316 | 31.66540063 | 57.52250135 |
| O  | 38.22385288 | 35.52624725 | 57.52331749 |
| O  | 35.66956741 | 34.19267260 | 55.88512409 |
| O  | 31.55842312 | 38.31562461 | 55.88400444 |
| O  | 35.72008492 | 37.14363511 | 55.88070630 |
| O  | 31.97055341 | 33.38463864 | 55.82911332 |
| Zn | 35.45356956 | 38.19432047 | 57.52270310 |
| Zn | 31.69457383 | 34.28012742 | 57.52242034 |
| Zn | 35.86807893 | 33.10007265 | 57.52365767 |
| Zn | 31.70213191 | 37.20973344 | 57.52300191 |
| Zn | 33.39204167 | 32.17204600 | 55.85717154 |
| Zn | 37.13421102 | 35.65491555 | 55.89520923 |
| Zn | 38.35468714 | 31.65287682 | 55.86230988 |
| Zn | 34.21367958 | 35.63995486 | 55.88015241 |
| O  | 38.34333378 | 27.62774867 | 60.79551498 |
| O  | 35.91527339 | 29.13993114 | 59.17514951 |
| Zn | 35.60733855 | 30.23663830 | 60.73324121 |
| Zn | 37.42934526 | 28.01700348 | 59.08095077 |
| O  | 30.26717280 | 35.71951965 | 60.89464567 |
| O  | 27.84442526 | 37.19599087 | 59.16565166 |
| Zn | 27.91415229 | 37.95697742 | 60.95150049 |

|    |             |             |             |
|----|-------------|-------------|-------------|
| Zn | 29.32743365 | 36.02336552 | 59.23780267 |
| O  | 37.24811245 | 31.61850444 | 60.81016503 |
| O  | 33.19682755 | 35.88267370 | 60.80880951 |
| O  | 34.29794584 | 31.67691196 | 60.82088914 |
| O  | 38.20188735 | 35.43484744 | 60.77047084 |
| O  | 35.67009946 | 34.19241681 | 59.16270500 |
| O  | 31.55939522 | 38.31454783 | 59.16274022 |
| O  | 35.71908633 | 37.14308404 | 59.16447728 |
| O  | 31.96709714 | 33.38184313 | 59.21465078 |
| Zn | 35.42897682 | 38.18231281 | 60.81656772 |
| Zn | 31.67626321 | 34.29029860 | 60.92220936 |
| Zn | 35.90541025 | 33.11686159 | 60.81002734 |
| Zn | 31.68158485 | 37.18934228 | 60.78125722 |
| Zn | 33.38835458 | 32.16906575 | 59.18653748 |
| Zn | 37.13407581 | 35.65450784 | 59.15166536 |
| Zn | 38.35358334 | 31.65377248 | 59.18514665 |
| Zn | 34.21380029 | 35.64009022 | 59.16631995 |
| O  | 35.69512227 | 29.18093495 | 62.50991499 |
| Zn | 35.70280890 | 30.57467114 | 63.82863201 |
| Zn | 37.09892768 | 28.23188467 | 61.96073165 |
| O  | 30.37169690 | 35.67090508 | 64.12475542 |
| O  | 27.60384017 | 36.96247115 | 62.46100791 |
| Zn | 29.11415520 | 36.03487216 | 62.77011577 |
| O  | 37.23132116 | 31.68077705 | 64.04277675 |
| O  | 33.44898874 | 36.43774673 | 63.99688779 |
| O  | 34.10216133 | 31.47050079 | 64.30152386 |
| O  | 37.90045983 | 34.93217610 | 63.96787790 |
| O  | 35.26871384 | 33.88419257 | 62.49880872 |
| O  | 31.57763594 | 38.39559979 | 62.40327941 |
| O  | 35.77474988 | 37.14512299 | 62.43914376 |
| O  | 32.06415113 | 33.44740554 | 62.61869441 |
| Zn | 34.78801715 | 37.91937366 | 64.10610523 |
| Zn | 31.71668367 | 34.28861373 | 64.31005308 |
| Zn | 36.50759177 | 33.46846153 | 64.03221676 |
| Zn | 31.62504800 | 37.01134051 | 63.70530290 |
| Zn | 33.64938945 | 32.39353518 | 62.59057656 |
| Zn | 37.43314955 | 36.10319760 | 62.43942792 |
| Zn | 38.35917030 | 31.47474446 | 62.52206039 |
| Zn | 34.31058327 | 35.58966627 | 62.38653891 |
| O  | 40.97284307 | 35.62586764 | 50.94752027 |
| O  | 38.49098031 | 37.11263169 | 49.13060091 |
| Zn | 39.70843047 | 34.25826652 | 51.34162426 |
| Zn | 39.61972639 | 36.93010786 | 50.64632763 |
| O  | 39.80823582 | 30.08828810 | 52.60285165 |
| Zn | 39.57684550 | 29.14407083 | 54.20616090 |
| O  | 41.12367202 | 35.61264196 | 54.16263228 |
| O  | 42.45359653 | 31.67393733 | 54.24674146 |

|    |             |             |             |
|----|-------------|-------------|-------------|
| O  | 43.75997896 | 34.35586076 | 52.59169804 |
| O  | 39.00069710 | 37.61015925 | 52.43342391 |
| O  | 39.83138521 | 32.91751719 | 52.66303952 |
| Zn | 39.70267503 | 34.10665599 | 54.27634466 |
| Zn | 43.46118422 | 33.34483397 | 54.09594071 |
| Zn | 39.70299835 | 36.98970463 | 54.21706862 |
| Zn | 41.13714994 | 31.39875047 | 52.99280886 |
| Zn | 42.23922394 | 35.27096084 | 52.30367381 |
| O  | 39.86602037 | 30.12586740 | 55.85017865 |
| Zn | 39.63453696 | 29.24000839 | 57.52388029 |
| O  | 41.13485152 | 35.64496869 | 57.52273611 |
| O  | 42.36684063 | 31.56290888 | 57.52362150 |
| O  | 43.54920802 | 34.11986338 | 55.88108480 |
| O  | 39.45062274 | 38.01601981 | 55.83569156 |
| O  | 39.82880301 | 33.01079379 | 55.90080533 |
| Zn | 39.67038363 | 34.12941932 | 57.52317540 |
| Zn | 43.40819164 | 33.18294371 | 57.52270246 |
| Zn | 39.69372688 | 37.06461922 | 57.52202075 |
| Zn | 41.41432006 | 31.58451891 | 55.88610833 |
| Zn | 42.07281941 | 35.29200356 | 55.82064002 |
| O  | 39.86541482 | 30.12655604 | 59.19729355 |
| Zn | 39.57573737 | 29.14529356 | 60.84171735 |
| O  | 41.12583235 | 35.61413473 | 60.88238009 |
| O  | 42.45233205 | 31.67425733 | 60.80029802 |
| O  | 43.55019524 | 34.11947463 | 59.16477593 |
| O  | 39.45411741 | 38.01976137 | 59.20716687 |
| O  | 39.82788609 | 33.01142976 | 59.14615267 |
| Zn | 39.70221635 | 34.10877670 | 60.76944213 |
| Zn | 43.46258000 | 33.34395339 | 60.94962948 |
| Zn | 39.70722061 | 36.99317360 | 60.82486690 |
| Zn | 41.41370067 | 31.58457261 | 59.16096783 |
| Zn | 42.07417062 | 35.29184089 | 59.22382709 |
| O  | 39.80677537 | 30.09094280 | 62.44422852 |
| O  | 40.97469780 | 35.62809862 | 64.09582396 |
| O  | 43.76018556 | 34.35352957 | 62.45520976 |
| O  | 39.00709178 | 37.61575773 | 62.61074331 |
| O  | 39.82900742 | 32.92014748 | 62.38355727 |
| Zn | 39.70705676 | 34.26300741 | 63.70353722 |
| Zn | 39.62850131 | 36.93785572 | 64.39873773 |
| Zn | 41.13535397 | 31.40216608 | 62.05445545 |
| Zn | 42.23981066 | 35.27173566 | 62.73762361 |
| O  | 37.30530797 | 39.87171420 | 50.76541784 |
| O  | 34.17676959 | 39.72619167 | 51.00921971 |
| Zn | 35.70415900 | 40.80709200 | 51.23906279 |
| Zn | 37.18011764 | 38.42460299 | 49.54210444 |
| O  | 28.92648640 | 39.63767467 | 54.23669991 |
| Zn | 30.24620339 | 39.88908305 | 52.98180881 |



|    |             |             |             |
|----|-------------|-------------|-------------|
| O  | 37.07774010 | 39.62208768 | 54.19145742 |
| O  | 33.04433892 | 43.68991892 | 54.24491546 |
| O  | 34.14112555 | 39.72050744 | 54.23149150 |
| O  | 35.74262849 | 42.18320058 | 52.56389394 |
| O  | 31.56058602 | 41.22888970 | 52.59503332 |
| Zn | 31.79685184 | 42.17751809 | 54.19049321 |
| Zn | 35.74856086 | 41.07675691 | 54.32037045 |
| Zn | 33.00711235 | 39.85440519 | 52.51685667 |
| Zn | 37.84051077 | 39.12575058 | 52.46707683 |
| Zn | 34.31412766 | 43.11222182 | 53.09864785 |
| O  | 29.02952403 | 39.74919869 | 57.52375177 |
| Zn | 29.95899149 | 39.72173407 | 55.87484805 |
| O  | 37.02607743 | 39.65094271 | 57.52215458 |
| O  | 32.91339553 | 43.61094680 | 57.52281552 |
| O  | 34.09734685 | 39.68838098 | 57.52269104 |
| O  | 35.46700857 | 42.18281857 | 55.87083906 |
| O  | 31.51587869 | 41.20507011 | 55.84075126 |
| Zn | 31.72671736 | 42.07261927 | 57.52357387 |
| Zn | 35.64026680 | 41.14679248 | 57.52217907 |
| Zn | 33.01068535 | 39.67483708 | 55.85477945 |
| Zn | 37.94544600 | 39.12613557 | 55.87594115 |
| Zn | 33.93905247 | 43.29602120 | 55.96621821 |
| O  | 28.92760446 | 39.63445780 | 60.81043769 |
| Zn | 29.95961509 | 39.72083435 | 59.17230155 |
| O  | 37.08001771 | 39.62256073 | 60.85269699 |
| O  | 33.04387790 | 43.68838431 | 60.80176412 |
| O  | 34.14260785 | 39.71995969 | 60.81414700 |
| O  | 35.46670732 | 42.18249728 | 59.17360147 |
| O  | 31.51641219 | 41.20418939 | 59.20596814 |
| Zn | 31.79749081 | 42.17487935 | 60.85750057 |
| Zn | 35.74913172 | 41.07612572 | 60.72364779 |
| Zn | 33.01141728 | 39.67413450 | 59.19120262 |
| Zn | 37.94757474 | 39.12806381 | 59.16714165 |
| Zn | 33.93814373 | 43.29522037 | 59.07982269 |
| Zn | 30.24760673 | 39.88341270 | 62.06572825 |
| O  | 37.31352047 | 39.87757488 | 64.27944665 |
| O  | 34.18305081 | 39.72917198 | 64.03459807 |
| O  | 35.74692752 | 42.18481973 | 62.47892140 |
| O  | 31.56093137 | 41.22491024 | 62.45193627 |
| Zn | 35.71039107 | 40.80982737 | 63.80481371 |
| Zn | 33.00882812 | 39.85246051 | 62.52995496 |
| Zn | 37.84760542 | 39.13280396 | 62.57707303 |
| Zn | 34.31673228 | 43.11172651 | 61.94596694 |
| O  | 35.72467700 | 34.22510174 | 65.73266341 |
| O  | 35.62963526 | 37.16810661 | 65.74665635 |
| O  | 32.83221563 | 34.21701515 | 65.88015477 |
| Zn | 34.14040340 | 32.90401468 | 65.50858671 |

|    |             |             |             |
|----|-------------|-------------|-------------|
| Zn | 37.08900396 | 35.70584340 | 65.69947049 |
| Zn | 34.22685777 | 35.61637825 | 65.67093497 |
| O  | 38.49367023 | 37.11493789 | 65.90871760 |
| Zn | 37.18180197 | 38.42682163 | 65.49891094 |

**BCT-162**

|    |             |             |             |
|----|-------------|-------------|-------------|
| Zn | 35.59208619 | 30.47633162 | 51.27530209 |
| O  | 30.25371672 | 35.59647463 | 50.99163438 |
| O  | 37.11630388 | 31.56125435 | 51.01866557 |
| O  | 33.35997707 | 36.32869754 | 51.02627733 |
| O  | 33.90388039 | 31.25232729 | 50.88333712 |
| O  | 37.79847917 | 34.97423518 | 50.85540780 |
| O  | 35.43104684 | 33.90476729 | 49.39265761 |
| O  | 35.30172738 | 36.81968447 | 49.05435748 |
| O  | 32.54988416 | 33.97586691 | 49.22172082 |
| Zn | 34.83495190 | 37.76504196 | 50.71638679 |
| Zn | 31.49936872 | 34.15021509 | 50.81613974 |
| Zn | 36.42486961 | 33.33674972 | 50.97770693 |
| Zn | 31.55892534 | 36.91027519 | 51.36572287 |
| Zn | 33.88182736 | 32.69153617 | 49.65642715 |
| Zn | 36.61960442 | 35.59649673 | 49.49546907 |
| Zn | 33.90494280 | 35.39369239 | 49.30645603 |
| O  | 38.36500742 | 27.66873135 | 54.25305501 |
| O  | 35.61061647 | 29.08587480 | 52.59683016 |
| Zn | 35.57510605 | 30.20768440 | 54.32666847 |
| Zn | 37.06701398 | 28.19799271 | 53.11160920 |
| O  | 30.20762420 | 35.65991522 | 54.17424459 |
| O  | 27.51450511 | 36.93936888 | 52.65105103 |
| Zn | 27.89727383 | 37.97154857 | 54.12318295 |
| Zn | 29.01529188 | 35.99597668 | 52.35148105 |
| O  | 37.16428320 | 31.59962618 | 54.23557586 |
| O  | 33.13118051 | 35.72690159 | 54.25347300 |
| O  | 34.23539813 | 31.65487543 | 54.22078548 |
| O  | 38.24667770 | 35.62700017 | 54.21388475 |
| O  | 35.63384364 | 34.18375256 | 52.63934508 |
| O  | 31.58643178 | 38.29847771 | 52.65795076 |
| O  | 35.73571041 | 37.13016806 | 52.51751674 |
| O  | 31.88818358 | 33.27855494 | 52.49451832 |
| Zn | 35.60965692 | 38.19423598 | 54.16202118 |
| Zn | 31.59063531 | 34.21947394 | 54.17822163 |
| Zn | 35.81038321 | 33.10412954 | 54.23613794 |
| Zn | 31.65659243 | 37.10949079 | 54.27549495 |
| Zn | 33.26380004 | 32.01695778 | 52.54477018 |
| Zn | 37.08882620 | 35.71604237 | 52.63794718 |
| Zn | 38.27670746 | 31.54536372 | 52.52791297 |
| Zn | 34.23479319 | 35.63472913 | 52.65991147 |

|    |             |             |             |
|----|-------------|-------------|-------------|
| O  | 38.44162574 | 27.68963147 | 57.52261311 |
| O  | 35.88426110 | 29.10942885 | 55.87941740 |
| Zn | 35.69171848 | 30.15244588 | 57.52257561 |
| Zn | 37.41863962 | 28.01187580 | 55.96053003 |
| O  | 30.21579406 | 35.64430302 | 57.52260674 |
| O  | 27.79585145 | 37.17258171 | 55.89525993 |
| Zn | 27.97998066 | 38.12357879 | 57.52264217 |
| Zn | 29.26497710 | 35.99483567 | 55.82652011 |
| O  | 37.21294074 | 31.62820335 | 57.52252795 |
| O  | 33.15415532 | 35.72279798 | 57.52247657 |
| O  | 34.30912527 | 31.64711018 | 57.52252167 |
| O  | 38.24708247 | 35.62639220 | 57.52241663 |
| O  | 35.70406443 | 34.19436670 | 55.88259558 |
| O  | 31.59774633 | 38.21842703 | 55.89136419 |
| O  | 35.69532922 | 37.11711372 | 55.85333868 |
| O  | 31.84737925 | 33.24718435 | 55.85054522 |
| Zn | 35.63645339 | 38.19264197 | 57.52248165 |
| Zn | 31.63203106 | 34.21155276 | 57.52248409 |
| Zn | 35.83945844 | 33.12050704 | 57.52246334 |
| Zn | 31.69722195 | 37.12150739 | 57.52253772 |
| Zn | 33.32711732 | 32.12840333 | 55.89378405 |
| Zn | 37.14395563 | 35.69584619 | 55.87291549 |
| Zn | 38.26439807 | 31.70405631 | 55.85619755 |
| Zn | 34.21686308 | 35.66296854 | 55.88069188 |
| O  | 38.36498160 | 27.66877594 | 60.79210247 |
| O  | 35.88423442 | 29.10943482 | 59.16572461 |
| Zn | 35.57514669 | 30.20773336 | 60.71845571 |
| Zn | 37.41857649 | 28.01189679 | 59.08467212 |
| O  | 30.20757843 | 35.66001107 | 60.87100278 |
| O  | 27.79583739 | 37.17260858 | 59.15003976 |
| Zn | 27.89724366 | 37.97193746 | 60.92192779 |
| Zn | 29.26501605 | 35.99487928 | 59.21868341 |
| O  | 37.16427188 | 31.59965798 | 60.80941186 |
| O  | 33.13117623 | 35.72701816 | 60.79155398 |
| O  | 34.23537425 | 31.65487201 | 60.82424704 |
| O  | 38.24672169 | 35.62692689 | 60.83090121 |
| O  | 35.70405887 | 34.19434858 | 59.16239802 |
| O  | 31.59762317 | 38.21850427 | 59.15366556 |
| O  | 35.69529961 | 37.11707821 | 59.19160903 |
| O  | 31.84742953 | 33.24731560 | 59.19450272 |
| Zn | 35.60953872 | 38.19416331 | 60.88286384 |
| Zn | 31.59058963 | 34.21957972 | 60.86686266 |
| Zn | 35.81039542 | 33.10414066 | 60.80881407 |
| Zn | 31.65651102 | 37.10959484 | 60.76955554 |
| Zn | 33.32711195 | 32.12843626 | 59.15120880 |
| Zn | 37.14397165 | 35.69583114 | 59.17192328 |
| Zn | 38.26438799 | 31.70406040 | 59.18882984 |

|    |             |             |             |
|----|-------------|-------------|-------------|
| Zn | 34.21683778 | 35.66292773 | 59.16426843 |
| O  | 35.61088759 | 29.08611098 | 62.44839212 |
| Zn | 35.59204691 | 30.47648593 | 63.76992901 |
| Zn | 37.06736405 | 28.19832487 | 61.93380371 |
| O  | 30.25387309 | 35.59666744 | 64.05364373 |
| O  | 27.51495037 | 36.94038254 | 62.39464350 |
| Zn | 29.01542129 | 35.99643586 | 62.69396037 |
| O  | 37.11629578 | 31.56135190 | 64.02636698 |
| O  | 33.36012401 | 36.32875117 | 64.01866496 |
| O  | 33.90384910 | 31.25247961 | 64.16171544 |
| O  | 37.79863430 | 34.97442796 | 64.18938947 |
| O  | 35.63385056 | 34.18379197 | 62.40562508 |
| O  | 31.58618387 | 38.29860402 | 62.38709786 |
| O  | 35.73576960 | 37.13018352 | 62.52737104 |
| O  | 31.88816102 | 33.27863599 | 62.55052236 |
| Zn | 34.83495719 | 37.76511985 | 64.32849481 |
| Zn | 31.49934626 | 34.15019921 | 64.22897134 |
| Zn | 36.42499496 | 33.33693833 | 64.06726774 |
| Zn | 31.55906658 | 36.91042660 | 63.67944296 |
| Zn | 33.26375504 | 32.01699631 | 62.50018283 |
| Zn | 37.08891255 | 35.71612162 | 62.40687569 |
| Zn | 38.27664598 | 31.54522691 | 62.51710530 |
| Zn | 34.23481367 | 35.63469718 | 62.38502477 |
| O  | 41.04632066 | 35.71002470 | 50.99143725 |
| O  | 40.03076862 | 38.46748343 | 49.05442789 |
| Zn | 43.77359777 | 38.37767702 | 51.36561273 |
| Zn | 39.63376950 | 34.53332512 | 51.25698991 |
| Zn | 40.49719208 | 37.52158217 | 50.71620650 |
| O  | 39.75215664 | 30.20686839 | 52.60451422 |
| Zn | 39.54490139 | 29.22802663 | 54.18344291 |
| O  | 41.15508622 | 35.62989303 | 54.22226391 |
| O  | 42.28963005 | 31.70193998 | 54.26000578 |
| O  | 46.36002225 | 35.69733221 | 54.26137912 |
| O  | 43.68949387 | 34.18705628 | 52.58531302 |
| O  | 39.59663186 | 38.15675479 | 52.51739123 |
| O  | 43.74620833 | 36.98925757 | 52.65790254 |
| O  | 39.68324886 | 33.10060738 | 52.57843228 |
| Zn | 43.67613147 | 38.17822686 | 54.27535148 |
| Zn | 39.71112821 | 34.21136415 | 54.27195007 |
| Zn | 43.36214882 | 33.25573221 | 54.18823617 |
| Zn | 39.72301605 | 37.09276598 | 54.16206161 |
| Zn | 40.99209496 | 31.62261798 | 52.93439031 |
| Zn | 45.03640434 | 35.44763391 | 53.01205967 |
| Zn | 42.26857795 | 35.57257575 | 52.47703710 |
| O  | 47.81870202 | 38.34892496 | 52.65142891 |
| Zn | 47.43579018 | 37.31632181 | 54.12322939 |
| O  | 39.79956833 | 30.16962418 | 55.86370432 |

|    |             |             |             |
|----|-------------|-------------|-------------|
| Zn | 39.56200325 | 29.25703735 | 57.52255076 |
| O  | 41.16422082 | 35.64157907 | 57.52252024 |
| O  | 42.25785445 | 31.77490196 | 57.52250639 |
| O  | 46.27050750 | 35.58139968 | 57.52255730 |
| O  | 43.72680788 | 34.20377795 | 55.85921167 |
| O  | 39.63772564 | 38.17032029 | 55.85310638 |
| O  | 43.73507691 | 37.06921975 | 55.89126197 |
| O  | 39.71384467 | 33.07415789 | 55.87959598 |
| Zn | 43.63564333 | 38.16596505 | 57.52253962 |
| Zn | 39.72403031 | 34.19836870 | 57.52245034 |
| Zn | 43.38635586 | 33.29602619 | 57.52253617 |
| Zn | 39.69683761 | 37.09498561 | 57.52246351 |
| Zn | 41.25494906 | 31.64630654 | 55.90982733 |
| Zn | 45.30340895 | 35.57633063 | 55.89427561 |
| Zn | 42.27284366 | 35.71875148 | 55.85519730 |
| O  | 47.53696664 | 38.11549678 | 55.89522191 |
| Zn | 47.35292483 | 37.16439185 | 57.52258721 |
| O  | 39.79954383 | 30.16967507 | 59.18136534 |
| Zn | 39.54490898 | 29.22802181 | 60.86156582 |
| O  | 41.15519119 | 35.62984988 | 60.82274943 |
| O  | 42.28969400 | 31.70193349 | 60.78498278 |
| O  | 46.36005060 | 35.69755677 | 60.78367677 |
| O  | 43.72683573 | 34.20379308 | 59.18585086 |
| O  | 39.63778486 | 38.17027958 | 59.19182359 |
| O  | 43.73509082 | 37.06927318 | 59.15381585 |
| O  | 39.71384020 | 33.07411877 | 59.16529669 |
| Zn | 43.67611719 | 38.17822952 | 60.76978564 |
| Zn | 39.71118943 | 34.21130561 | 60.77292722 |
| Zn | 43.36215135 | 33.25576233 | 60.85684241 |
| Zn | 39.72306638 | 37.09262033 | 60.88278190 |
| Zn | 41.25494948 | 31.64631730 | 59.13520241 |
| Zn | 45.30340255 | 35.57635184 | 59.15081850 |
| Zn | 42.27289822 | 35.71875015 | 59.18982156 |
| O  | 47.53711303 | 38.11570525 | 59.14977432 |
| Zn | 47.43577066 | 37.31655350 | 60.92178529 |
| O  | 39.75214867 | 30.20675555 | 62.44055232 |
| O  | 41.04629810 | 35.70954211 | 64.05357537 |
| O  | 43.68968048 | 34.18709147 | 62.45972100 |
| O  | 39.59636069 | 38.15631829 | 62.52760505 |
| O  | 43.74624599 | 36.98926656 | 62.38722707 |
| O  | 39.68321477 | 33.10043059 | 62.46634070 |
| Zn | 43.77351670 | 38.37773278 | 63.67952768 |
| Zn | 39.63369903 | 34.53297186 | 63.78789012 |
| Zn | 40.49692794 | 37.52107096 | 64.32876589 |
| Zn | 40.99211904 | 31.62245869 | 62.11056216 |
| Zn | 45.03649691 | 35.44779473 | 62.03302894 |
| Zn | 42.26863526 | 35.57251594 | 62.56807405 |

|    |             |             |             |
|----|-------------|-------------|-------------|
| O  | 47.81854162 | 38.34894830 | 62.39375912 |
| O  | 37.53364750 | 40.31275904 | 50.85540481 |
| O  | 34.28613872 | 39.57685515 | 50.99145258 |
| O  | 38.21781151 | 43.72653011 | 51.01935858 |
| Zn | 35.69842499 | 40.75373411 | 51.25724339 |
| Zn | 38.71269374 | 39.69023410 | 49.49576638 |
| O  | 28.97294433 | 39.59048821 | 54.26141167 |
| Zn | 30.29638957 | 39.84028832 | 53.01200979 |
| O  | 37.08597598 | 39.66010573 | 54.21410622 |
| O  | 33.04367776 | 43.58567670 | 54.26004180 |
| O  | 34.17779952 | 39.65736921 | 54.22229444 |
| O  | 38.16902175 | 43.68756684 | 54.23553435 |
| O  | 35.64993333 | 42.18667701 | 52.57838319 |
| O  | 35.58105884 | 45.08043919 | 52.60435663 |
| O  | 31.64359362 | 41.10063021 | 52.58543309 |
| Zn | 35.78864289 | 46.05928680 | 54.18326226 |
| Zn | 31.97110188 | 42.03196103 | 54.18835051 |
| Zn | 35.62179237 | 41.07588636 | 54.27200058 |
| Zn | 33.06416767 | 39.71494656 | 52.47731111 |
| Zn | 37.05661942 | 43.74231174 | 52.52794629 |
| Zn | 38.24351260 | 39.57096223 | 52.63816329 |
| Zn | 34.34114771 | 43.66471527 | 52.93441238 |
| O  | 36.96837598 | 47.61851083 | 54.25266155 |
| Zn | 38.26653128 | 47.08916687 | 53.11143454 |
| O  | 29.06260384 | 39.70647755 | 57.52247475 |
| Zn | 30.02967663 | 39.71146756 | 55.89430616 |
| O  | 37.08624953 | 39.66128107 | 57.52249168 |
| O  | 33.07523763 | 43.51314970 | 57.52247631 |
| O  | 34.16899872 | 39.64598944 | 57.52249410 |
| O  | 38.12015163 | 43.65891641 | 57.52254939 |
| O  | 35.61922198 | 42.21328051 | 55.87954559 |
| O  | 35.53404821 | 45.11777088 | 55.86369990 |
| O  | 31.60640091 | 41.08383682 | 55.85926246 |
| Zn | 35.77177181 | 46.03041778 | 57.52252948 |
| Zn | 31.94706015 | 41.99190708 | 57.52243778 |
| Zn | 35.60917319 | 41.08925642 | 57.52250565 |
| Zn | 33.06020710 | 39.56864778 | 55.85528640 |
| Zn | 37.06895036 | 43.58315559 | 55.85606312 |
| Zn | 38.18915676 | 39.59159395 | 55.87284551 |
| Zn | 34.07841888 | 43.64152524 | 55.90989286 |
| O  | 36.89164226 | 47.59811752 | 57.52250025 |
| Zn | 37.91446669 | 47.27564862 | 55.96035320 |
| O  | 28.97282742 | 39.59096766 | 60.78345711 |
| Zn | 30.02972266 | 39.71167189 | 59.15065901 |
| O  | 37.08580973 | 39.66006736 | 60.83076992 |
| O  | 33.04358246 | 43.58578337 | 60.78500169 |
| O  | 34.17768238 | 39.65734386 | 60.82267183 |

|    |             |             |             |
|----|-------------|-------------|-------------|
| O  | 38.16909504 | 43.68749966 | 60.80939733 |
| O  | 35.61906566 | 42.21327853 | 59.16548053 |
| O  | 35.53395157 | 45.11775670 | 59.18132100 |
| O  | 31.60646737 | 41.08393174 | 59.18570195 |
| Zn | 35.78863246 | 46.05931577 | 60.86171951 |
| Zn | 31.97092562 | 42.03211781 | 60.85663008 |
| Zn | 35.62162316 | 41.07587912 | 60.77300743 |
| Zn | 33.06015455 | 39.56869856 | 59.18969937 |
| Zn | 37.06884797 | 43.58303988 | 59.18896976 |
| Zn | 38.18918344 | 39.59157976 | 59.17208815 |
| Zn | 34.07831168 | 43.64157347 | 59.13511271 |
| O  | 36.96841647 | 47.61854537 | 60.79234428 |
| Zn | 37.91454133 | 47.27580801 | 59.08465174 |
| Zn | 30.29627816 | 39.84045414 | 62.03295719 |
| O  | 37.53308461 | 40.31209405 | 64.18947072 |
| O  | 34.28584541 | 39.57687845 | 64.05347812 |
| O  | 38.21813771 | 43.72633261 | 64.02541225 |
| O  | 35.64987827 | 42.18668717 | 62.46656273 |
| O  | 35.58108352 | 45.08044205 | 62.44063131 |
| O  | 31.64349190 | 41.10081372 | 62.45956542 |
| Zn | 35.69803836 | 40.75376781 | 63.78761506 |
| Zn | 33.06392823 | 39.71495633 | 62.56759341 |
| Zn | 37.05671326 | 43.74240968 | 62.51693326 |
| Zn | 38.24324357 | 39.57049104 | 62.40670848 |
| Zn | 34.34109407 | 43.66477246 | 62.11059596 |
| Zn | 38.26665336 | 47.08912678 | 61.93355006 |
| O  | 45.07917431 | 39.69110188 | 50.99169269 |
| O  | 41.43159830 | 44.03708663 | 50.88249549 |
| O  | 41.97220835 | 38.95777159 | 51.02646745 |
| O  | 42.78190015 | 41.31169210 | 49.22308458 |
| O  | 39.90097671 | 41.38236345 | 49.39326196 |
| Zn | 38.90615715 | 41.94980710 | 50.97789187 |
| Zn | 43.83442493 | 41.13815130 | 50.81622972 |
| Zn | 39.74251885 | 44.81091718 | 51.27528486 |
| Zn | 41.42753934 | 39.89345875 | 49.30721874 |
| Zn | 41.44948109 | 42.59562069 | 49.65904463 |
| O  | 45.12513314 | 39.62776489 | 54.17409159 |
| O  | 41.09811635 | 43.63262048 | 54.22031909 |
| O  | 42.20159455 | 39.56090643 | 54.25309875 |
| O  | 43.44604459 | 42.01014519 | 52.49462384 |
| O  | 39.72297287 | 46.20152047 | 52.59684095 |
| O  | 39.69845469 | 41.10301083 | 52.63929167 |
| Zn | 39.52310121 | 42.18310610 | 54.23574250 |
| Zn | 43.74210176 | 41.06831862 | 54.17804982 |
| Zn | 39.75800426 | 45.07951410 | 54.32662173 |
| Zn | 41.09736499 | 39.65190378 | 52.65986426 |
| Zn | 46.31759659 | 39.29192475 | 52.35169673 |

|    |             |             |             |
|----|-------------|-------------|-------------|
| Zn | 42.07083664 | 43.27215948 | 52.54442351 |
| O  | 45.11693548 | 39.64335687 | 57.52252534 |
| O  | 41.02374952 | 43.64036486 | 57.52250138 |
| O  | 42.17863889 | 39.56465095 | 57.52251773 |
| O  | 43.48530428 | 42.04021986 | 55.85061169 |
| O  | 39.44862527 | 46.17778566 | 55.87932917 |
| O  | 39.62901753 | 41.09322157 | 55.88253352 |
| Zn | 39.49364861 | 42.16666500 | 57.52255661 |
| Zn | 43.70040641 | 41.07602341 | 57.52253943 |
| Zn | 39.64095452 | 45.13472234 | 57.52249116 |
| Zn | 41.11627276 | 39.62454888 | 55.88050448 |
| Zn | 46.06773458 | 39.29310628 | 55.82649543 |
| Zn | 42.00560772 | 43.15917121 | 55.89369217 |
| O  | 45.12509184 | 39.62776044 | 60.87091433 |
| O  | 41.09822914 | 43.63271716 | 60.82485648 |
| O  | 42.20154332 | 39.56091975 | 60.79212252 |
| O  | 43.48511812 | 42.04008542 | 59.19447783 |
| O  | 39.44868571 | 46.17789273 | 59.16561500 |
| O  | 39.62910418 | 41.09321668 | 59.16254161 |
| Zn | 39.52315018 | 42.18303021 | 60.80943123 |
| Zn | 43.74205326 | 41.06835686 | 60.86714023 |
| Zn | 39.75806047 | 45.07953473 | 60.71830781 |
| Zn | 41.11634937 | 39.62454955 | 59.16460451 |
| Zn | 46.06767639 | 39.29312226 | 59.21853168 |
| Zn | 42.00550897 | 43.15912177 | 59.15136120 |
| O  | 45.07902511 | 39.69118294 | 64.05326580 |
| O  | 41.43271187 | 44.03792591 | 64.16292730 |
| O  | 41.97181603 | 38.95700550 | 64.01846881 |
| O  | 43.44649990 | 42.01068836 | 62.55025846 |
| O  | 39.72312592 | 46.20134372 | 62.44821903 |
| O  | 39.69817460 | 41.10260154 | 62.40566325 |
| Zn | 38.90512538 | 41.94907419 | 64.06693998 |
| Zn | 43.83446714 | 41.13844276 | 64.22863948 |
| Zn | 39.74309555 | 44.81050679 | 63.76962499 |
| Zn | 41.09701986 | 39.65157064 | 62.38518352 |
| Zn | 46.31745882 | 39.29200457 | 62.69321342 |
| Zn | 42.07145876 | 43.27288520 | 62.50064307 |
| O  | 35.43120258 | 33.90493185 | 65.65239849 |
| O  | 35.30200051 | 36.81987692 | 65.99054384 |
| O  | 32.55013728 | 33.97601555 | 65.82333449 |
| Zn | 33.88204662 | 32.69174078 | 65.38842102 |
| Zn | 36.61981922 | 35.59668602 | 65.54935650 |
| Zn | 33.90514234 | 35.39382988 | 65.73847542 |
| O  | 40.03052188 | 38.46702045 | 65.99051130 |
| Zn | 38.71228516 | 39.68951332 | 65.54906811 |
| O  | 42.78139921 | 41.31160366 | 65.82116065 |
| O  | 39.90045428 | 41.38179988 | 65.65120502 |



|    |             |             |             |
|----|-------------|-------------|-------------|
| Zn | 41.42727127 | 39.89307289 | 65.73748342 |
| Zn | 41.44845866 | 42.59505643 | 65.38486074 |

**BCT-216**

|    |             |             |             |
|----|-------------|-------------|-------------|
| Zn | 35.63938440 | 30.44239488 | 51.24200985 |
| O  | 30.28466283 | 35.65273728 | 50.92131537 |
| O  | 37.16782771 | 31.55425950 | 51.00941604 |
| O  | 33.23467946 | 36.09495218 | 51.05787303 |
| O  | 34.05181771 | 31.40287081 | 50.83032814 |
| O  | 38.14232724 | 35.49248021 | 50.89798302 |
| O  | 35.61011016 | 33.98151762 | 49.41117593 |
| O  | 35.44107143 | 36.89107916 | 49.17194742 |
| O  | 32.69005306 | 34.09789951 | 49.08327240 |
| Zn | 35.27455939 | 38.01351160 | 50.74771963 |
| Zn | 31.71994297 | 34.34948176 | 50.77418661 |
| Zn | 36.29460995 | 33.24248207 | 51.03220708 |
| Zn | 31.56178875 | 37.00089730 | 51.34872686 |
| Zn | 33.94404656 | 32.80004124 | 49.55222600 |
| Zn | 36.76329739 | 35.62480629 | 49.58203801 |
| Zn | 34.02035279 | 35.54400375 | 49.31701377 |
| O  | 38.29332209 | 27.60884988 | 54.26554800 |
| O  | 35.58532728 | 29.07393906 | 52.56897637 |
| Zn | 35.54050878 | 30.19585259 | 54.31876525 |
| Zn | 37.01461956 | 28.15455903 | 53.11014490 |
| O  | 30.22306788 | 35.63013303 | 54.15982380 |
| O  | 27.52389864 | 36.84099772 | 52.68145337 |
| Zn | 27.91676470 | 37.91053976 | 54.12388799 |
| Zn | 29.04904387 | 35.96850113 | 52.28600590 |
| O  | 37.15095007 | 31.55165887 | 54.23922036 |
| O  | 33.15796381 | 35.71289683 | 54.24915634 |
| O  | 34.24506391 | 31.67371271 | 54.18730193 |
| O  | 38.26778392 | 35.63179292 | 54.24633001 |
| O  | 35.75078396 | 34.21756961 | 52.63967995 |
| O  | 31.55195802 | 38.30997890 | 52.70052330 |
| O  | 35.73184622 | 37.12976211 | 52.55376193 |
| O  | 31.92941877 | 33.31990477 | 52.42748417 |
| Zn | 35.61115343 | 38.20332743 | 54.19472901 |
| Zn | 31.61833065 | 34.20670597 | 54.13682098 |
| Zn | 35.83303585 | 33.10348447 | 54.23341594 |
| Zn | 31.65869975 | 37.07920422 | 54.27713254 |
| Zn | 33.29912618 | 32.07337085 | 52.49478206 |
| Zn | 37.15137530 | 35.77318234 | 52.64072366 |
| Zn | 38.26966912 | 31.46083138 | 52.55859757 |
| Zn | 34.25915597 | 35.68894994 | 52.64348113 |
| O  | 38.37512028 | 27.66413838 | 57.52363043 |
| O  | 35.81753693 | 29.08613056 | 55.87109011 |

|    |             |             |             |
|----|-------------|-------------|-------------|
| Zn | 35.64316263 | 30.12831543 | 57.52338366 |
| Zn | 37.34156672 | 27.97859485 | 55.96693851 |
| O  | 30.21861925 | 35.60398017 | 57.52304817 |
| O  | 27.80420995 | 37.10753622 | 55.89435754 |
| Zn | 27.98661696 | 38.05719867 | 57.52311620 |
| Zn | 29.27967585 | 35.93635148 | 55.81431197 |
| O  | 37.19422423 | 31.57922408 | 57.52245454 |
| O  | 33.15462424 | 35.68973103 | 57.52270165 |
| O  | 34.29200304 | 31.63842200 | 57.52357636 |
| O  | 38.23877890 | 35.60851715 | 57.52199944 |
| O  | 35.71269741 | 34.16757375 | 55.88362917 |
| O  | 31.59668473 | 38.18840781 | 55.89500619 |
| O  | 35.69034796 | 37.09356456 | 55.86017419 |
| O  | 31.85174273 | 33.24113021 | 55.82969785 |
| Zn | 35.63287025 | 38.17487555 | 57.52205491 |
| Zn | 31.63509657 | 34.17720387 | 57.52304276 |
| Zn | 35.83138426 | 33.09600855 | 57.52283649 |
| Zn | 31.69117929 | 37.09012028 | 57.52267952 |
| Zn | 33.33227433 | 32.12903875 | 55.87542716 |
| Zn | 37.13007608 | 35.68664824 | 55.87688450 |
| Zn | 38.24522527 | 31.66119198 | 55.86129740 |
| Zn | 34.20957983 | 35.64751575 | 55.88207208 |
| O  | 38.29477513 | 27.60969166 | 60.78159490 |
| O  | 35.81825509 | 29.08681969 | 59.17582867 |
| Zn | 35.54193077 | 30.19648760 | 60.72844697 |
| Zn | 37.34206517 | 27.97893044 | 59.08088876 |
| O  | 30.22432350 | 35.63051865 | 60.88608981 |
| O  | 27.80464275 | 37.10767905 | 59.15205251 |
| Zn | 27.91752064 | 37.91127186 | 60.92217248 |
| Zn | 29.28019238 | 35.93659074 | 59.23194158 |
| O  | 37.15204204 | 31.55323743 | 60.80543029 |
| O  | 33.15898525 | 35.71443934 | 60.79642571 |
| O  | 34.24592297 | 31.67406676 | 60.86051108 |
| O  | 38.26877021 | 35.63234478 | 60.79741897 |
| O  | 35.71278413 | 34.16787255 | 59.16176250 |
| O  | 31.59669383 | 38.18886055 | 59.14999991 |
| O  | 35.69077056 | 37.09398067 | 59.18425519 |
| O  | 31.85274722 | 33.24157203 | 59.21662722 |
| Zn | 35.61114926 | 38.20426940 | 60.84933252 |
| Zn | 31.62038485 | 34.20764734 | 60.90915886 |
| Zn | 35.83333607 | 33.10417786 | 60.81264445 |
| Zn | 31.65923112 | 37.08024956 | 60.76827775 |
| Zn | 33.33315833 | 32.12921164 | 59.17249358 |
| Zn | 37.13029483 | 35.68681109 | 59.16720689 |
| Zn | 38.24579032 | 31.66190856 | 59.18321614 |
| Zn | 34.20995657 | 35.64793122 | 59.16304678 |
| O  | 35.59039883 | 29.07869319 | 62.47907655 |

|    |             |             |             |
|----|-------------|-------------|-------------|
| Zn | 35.63878592 | 30.44903395 | 63.80587105 |
| Zn | 37.01860342 | 28.15769155 | 61.93880065 |
| O  | 30.28823440 | 35.65457216 | 64.12406891 |
| O  | 27.52659223 | 36.84266035 | 62.36577708 |
| Zn | 29.05206278 | 35.96988878 | 62.75946422 |
| O  | 37.16902892 | 31.55903094 | 64.03498443 |
| O  | 33.24074439 | 36.10336346 | 63.98865899 |
| O  | 34.04379606 | 31.39461599 | 64.22024130 |
| O  | 38.14096246 | 35.48877278 | 64.14639803 |
| O  | 35.75249265 | 34.21988033 | 62.40501209 |
| O  | 31.55160371 | 38.31134074 | 62.34440420 |
| O  | 35.73332853 | 37.13179996 | 62.49080748 |
| O  | 31.93386339 | 33.32254805 | 62.61865893 |
| Zn | 35.27028295 | 38.01269534 | 64.29685749 |
| Zn | 31.72202704 | 34.35089938 | 64.27197471 |
| Zn | 36.30748466 | 33.25258041 | 64.01303252 |
| Zn | 31.56517961 | 37.00322096 | 63.69733436 |
| Zn | 33.29973187 | 32.07115235 | 62.55415338 |
| Zn | 37.15261880 | 35.77611169 | 62.40247398 |
| Zn | 38.27054853 | 31.46104897 | 62.48551991 |
| Zn | 34.26063724 | 35.68979509 | 62.40170247 |
| O  | 41.01315231 | 35.62070780 | 50.95856520 |
| O  | 39.61805011 | 38.21439235 | 49.26748460 |
| Zn | 43.75696861 | 38.46313470 | 51.32235761 |
| Zn | 39.69882361 | 34.33167410 | 51.31318610 |
| Zn | 39.75129918 | 37.08486487 | 50.78614805 |
| O  | 39.74001654 | 30.10623743 | 52.61761503 |
| Zn | 39.50312473 | 29.13995167 | 54.20625661 |
| O  | 41.13537308 | 35.60846670 | 54.21601772 |
| O  | 42.29334707 | 31.68695532 | 54.27724645 |
| O  | 46.22745862 | 35.67852822 | 54.28865208 |
| O  | 43.62748528 | 34.22597521 | 52.58648030 |
| O  | 39.66426192 | 38.17008026 | 52.53567079 |
| O  | 43.64867362 | 37.07228538 | 52.60224653 |
| O  | 39.67163433 | 32.98839922 | 52.64685389 |
| Zn | 43.66206998 | 38.19756334 | 54.28752420 |
| Zn | 39.69247394 | 34.19311684 | 54.29806646 |
| Zn | 43.30609688 | 33.27825189 | 54.17665449 |
| Zn | 39.72671432 | 37.10672356 | 54.18938108 |
| Zn | 40.99272432 | 31.48821134 | 52.97613918 |
| Zn | 44.92950205 | 35.52583684 | 52.98209470 |
| Zn | 42.19814830 | 35.61304216 | 52.44609244 |
| O  | 47.68405068 | 38.13975990 | 52.61111443 |
| Zn | 47.30975833 | 37.21780670 | 54.20819890 |
| O  | 39.78269277 | 30.11825887 | 55.86135879 |
| Zn | 39.51887667 | 29.21400838 | 57.52247266 |
| O  | 41.12414241 | 35.60722771 | 57.52189236 |

|    |             |             |             |
|----|-------------|-------------|-------------|
| O  | 42.24149842 | 31.71302623 | 57.52177425 |
| O  | 46.20377613 | 35.76729139 | 57.52180665 |
| O  | 43.67526127 | 34.19678792 | 55.87539301 |
| O  | 39.66701279 | 38.17161515 | 55.86903075 |
| O  | 43.65917532 | 37.08027710 | 55.89204214 |
| O  | 39.69678945 | 33.03028399 | 55.88689590 |
| Zn | 43.69034293 | 38.20009068 | 57.52194384 |
| Zn | 39.68272677 | 34.16789500 | 57.52186593 |
| Zn | 43.31717552 | 33.26058606 | 57.52162136 |
| Zn | 39.66847884 | 37.08476981 | 57.52175742 |
| Zn | 41.22926726 | 31.60220278 | 55.91308567 |
| Zn | 45.17127525 | 35.59223281 | 55.93212536 |
| Zn | 42.20773963 | 35.72176366 | 55.86222473 |
| O  | 47.69871566 | 38.19355697 | 55.86379809 |
| Zn | 47.33490526 | 37.27877401 | 57.52184949 |
| O  | 39.78347309 | 30.11870239 | 59.18324991 |
| Zn | 39.50508068 | 29.14055592 | 60.83823851 |
| O  | 41.13605174 | 35.60894314 | 60.82784803 |
| O  | 42.29406737 | 31.68662391 | 60.76670117 |
| O  | 46.22765647 | 35.67760765 | 60.75509493 |
| O  | 43.67533171 | 34.19650400 | 59.16811347 |
| O  | 39.66704403 | 38.17177970 | 59.17443345 |
| O  | 43.65948898 | 37.08005791 | 59.15175130 |
| O  | 39.69756863 | 33.03068905 | 59.15714203 |
| Zn | 43.66215493 | 38.19698210 | 60.75648177 |
| Zn | 39.69324201 | 34.19345955 | 60.74596679 |
| Zn | 43.30668505 | 33.27808177 | 60.86694949 |
| Zn | 39.72754605 | 37.10718140 | 60.85395495 |
| Zn | 41.22996740 | 31.60246603 | 59.13086802 |
| Zn | 45.17147490 | 35.59191524 | 59.11163385 |
| Zn | 42.20801175 | 35.72160069 | 59.18126234 |
| O  | 47.69865709 | 38.19306495 | 59.18026402 |
| Zn | 47.31005043 | 37.21684060 | 60.83554244 |
| O  | 39.74091162 | 30.10675511 | 62.42729337 |
| O  | 41.01382697 | 35.62141051 | 64.08544091 |
| O  | 43.62758446 | 34.22577337 | 62.45728176 |
| O  | 39.66392772 | 38.16999980 | 62.50813425 |
| O  | 43.64934154 | 37.07216086 | 62.44200453 |
| O  | 39.67295627 | 32.98891026 | 62.39718667 |
| Zn | 43.75680205 | 38.46308745 | 63.72227823 |
| Zn | 39.70013797 | 34.33181015 | 63.73131057 |
| Zn | 39.75316853 | 37.08589103 | 64.25740379 |
| Zn | 40.99369425 | 31.48876933 | 62.06828541 |
| Zn | 44.92989935 | 35.52565100 | 62.06203758 |
| Zn | 42.19870617 | 35.61332568 | 62.59740216 |
| O  | 47.68409263 | 38.13818359 | 62.43304105 |
| O  | 37.02539035 | 39.56961701 | 50.92594930 |

|    |             |             |             |
|----|-------------|-------------|-------------|
| O  | 34.15169946 | 39.57283430 | 50.94939102 |
| O  | 38.28244544 | 43.62968829 | 50.95878137 |
| Zn | 35.53870862 | 40.78727478 | 51.32243846 |
| Zn | 38.34148249 | 39.64625866 | 49.57498116 |
| O  | 28.94162098 | 39.55178042 | 54.27925445 |
| Zn | 30.26454796 | 39.86873846 | 53.04774476 |
| O  | 37.10385252 | 39.63798459 | 54.22091901 |
| O  | 33.06793092 | 43.57140337 | 54.28865904 |
| O  | 34.17228520 | 39.64798274 | 54.22291914 |
| O  | 38.16001698 | 43.64172319 | 54.21616092 |
| O  | 35.64693298 | 42.17800916 | 52.60237987 |
| O  | 35.66797126 | 45.02428855 | 52.58661634 |
| O  | 31.61164109 | 41.10998705 | 52.61104896 |
| Zn | 35.98939394 | 45.97204870 | 54.17678857 |
| Zn | 31.98580373 | 42.03200089 | 54.20816215 |
| Zn | 35.63337382 | 41.05246940 | 54.28755642 |
| Zn | 33.02147809 | 39.70039072 | 52.48434107 |
| Zn | 37.09735929 | 43.63729151 | 52.44634256 |
| Zn | 38.19307453 | 39.56714771 | 52.56750951 |
| Zn | 34.36596367 | 43.72445300 | 52.98223081 |
| O  | 37.00213902 | 47.56331907 | 54.27731657 |
| Zn | 38.30285331 | 47.76219404 | 52.97634031 |
| O  | 29.04919142 | 39.65210872 | 57.52249976 |
| Zn | 30.02682042 | 39.67653750 | 55.90191074 |
| O  | 37.09105900 | 39.62118386 | 57.52181490 |
| O  | 33.09158074 | 43.48260538 | 57.52182593 |
| O  | 34.16229365 | 39.61232442 | 57.52209479 |
| O  | 38.17126541 | 43.64288442 | 57.52193108 |
| O  | 35.63622044 | 42.16978228 | 55.89205372 |
| O  | 35.62007485 | 45.05333207 | 55.87544306 |
| O  | 31.59674552 | 41.05628569 | 55.86373752 |
| Zn | 35.97818351 | 45.98954517 | 57.52166939 |
| Zn | 31.96054928 | 41.97105272 | 57.52182916 |
| Zn | 35.60503729 | 41.04993343 | 57.52195551 |
| Zn | 33.05107221 | 39.54810651 | 55.85429895 |
| Zn | 37.08760508 | 43.52835461 | 55.86232383 |
| Zn | 38.19143147 | 39.60557460 | 55.87411734 |
| Zn | 34.12409451 | 43.65780949 | 55.93216371 |
| O  | 37.05383411 | 47.53711636 | 57.52182139 |
| Zn | 38.06619940 | 47.64802248 | 55.91323002 |
| O  | 28.94146867 | 39.55300268 | 60.76556573 |
| Zn | 30.02690007 | 39.67712529 | 59.14306031 |
| O  | 37.10402097 | 39.63885644 | 60.82276339 |
| O  | 33.06769712 | 43.57232809 | 60.75511835 |
| O  | 34.17217615 | 39.64859784 | 60.82126751 |
| O  | 38.15935876 | 43.64130898 | 60.82779029 |
| O  | 35.63591790 | 42.17001725 | 59.15174159 |

|    |             |             |             |
|----|-------------|-------------|-------------|
| O  | 35.61998997 | 45.05361203 | 59.16816088 |
| O  | 31.59679659 | 41.05679738 | 59.18027805 |
| Zn | 35.98880321 | 45.97221172 | 60.86689824 |
| Zn | 31.98544773 | 42.03298570 | 60.83556439 |
| Zn | 35.63324685 | 41.05307243 | 60.75645667 |
| Zn | 33.05107206 | 39.54857944 | 59.18984172 |
| Zn | 37.08733922 | 43.52852371 | 59.18125453 |
| Zn | 38.19136060 | 39.60562266 | 59.16944630 |
| Zn | 34.12387808 | 43.65812304 | 59.11164724 |
| O  | 37.00144197 | 47.56364735 | 60.76665760 |
| Zn | 38.06555332 | 47.64782507 | 59.13079553 |
| Zn | 30.26431720 | 39.87003692 | 61.99717865 |
| O  | 37.02568626 | 39.57070640 | 64.11805097 |
| O  | 34.15060297 | 39.57404187 | 64.09521452 |
| O  | 38.28164700 | 43.62895271 | 64.08532273 |
| O  | 35.64616618 | 42.17810414 | 62.44189187 |
| O  | 35.66780448 | 45.02448828 | 62.45721293 |
| O  | 31.61148212 | 41.11157549 | 62.43306147 |
| Zn | 35.53869570 | 40.78730378 | 63.72220834 |
| Zn | 33.02121649 | 39.70197358 | 62.55969033 |
| Zn | 37.09672760 | 43.63698341 | 62.59725213 |
| Zn | 38.19263659 | 39.56712809 | 62.47647131 |
| Zn | 34.36550395 | 43.72463994 | 62.06193999 |
| Zn | 38.30190901 | 47.76165077 | 62.06810697 |
| O  | 45.14435745 | 39.67716876 | 50.94936932 |
| O  | 41.15401903 | 43.75932437 | 50.89805324 |
| O  | 42.27041867 | 39.68087781 | 50.92623400 |
| O  | 46.05952770 | 43.15311401 | 51.05763218 |
| O  | 43.85401639 | 42.35805212 | 49.17093464 |
| O  | 43.68546440 | 45.26856789 | 49.41145710 |
| O  | 39.67796786 | 41.03626173 | 49.26765167 |
| Zn | 42.99733549 | 46.00488453 | 51.03231621 |
| Zn | 39.54386357 | 42.16535948 | 50.78643218 |
| Zn | 44.02237329 | 41.23714261 | 50.74785220 |
| Zn | 39.59665531 | 44.91883814 | 51.31324693 |
| Zn | 40.95452355 | 39.60417754 | 49.57516364 |
| Zn | 45.27462483 | 43.70525027 | 49.31706913 |
| Zn | 42.53235055 | 43.62442528 | 49.58146844 |
| O  | 49.01000707 | 43.59690995 | 50.92125224 |
| O  | 46.60406261 | 45.15231271 | 49.08384590 |
| Zn | 47.73286146 | 42.24860528 | 51.34855286 |
| Zn | 47.57552255 | 44.90067734 | 50.77414887 |
| O  | 45.24684187 | 47.85043503 | 50.82915451 |
| O  | 42.12792445 | 47.69482063 | 51.00986826 |
| Zn | 43.65684248 | 48.80609689 | 51.24159526 |
| Zn | 45.34961857 | 46.45009884 | 49.55371949 |
| O  | 45.12324095 | 39.60199167 | 54.22297604 |

|    |             |             |             |
|----|-------------|-------------|-------------|
| O  | 41.02750097 | 43.61828865 | 54.24655819 |
| O  | 42.19161370 | 39.61206821 | 54.22108799 |
| O  | 46.13740899 | 43.53683189 | 54.24913375 |
| O  | 43.56342613 | 42.12005409 | 52.55388611 |
| O  | 39.62385811 | 46.26197395 | 52.64710957 |
| O  | 43.54448575 | 45.03209333 | 52.63987891 |
| O  | 39.63137203 | 41.08031247 | 52.53576116 |
| Zn | 43.46277281 | 46.14659471 | 54.23326596 |
| Zn | 39.56863618 | 42.14341389 | 54.18964245 |
| Zn | 43.68438598 | 41.04660945 | 54.19485287 |
| Zn | 39.60293520 | 45.05708976 | 54.29816055 |
| Zn | 41.10262556 | 39.68304351 | 52.56753155 |
| Zn | 45.03619462 | 43.56113192 | 52.64346929 |
| Zn | 46.27424787 | 39.54936541 | 52.48452806 |
| Zn | 42.14398028 | 43.47635625 | 52.64119221 |
| O  | 49.07222612 | 43.61984604 | 54.15987049 |
| O  | 50.35400831 | 39.69782575 | 54.27934791 |
| O  | 51.77182531 | 42.40907356 | 52.68160001 |
| O  | 47.36522196 | 45.92961147 | 52.42760292 |
| O  | 47.74382048 | 40.93977072 | 52.70063947 |
| Zn | 47.63673958 | 42.17059977 | 54.27712316 |
| Zn | 51.37859029 | 41.33925488 | 54.12402206 |
| Zn | 47.67678865 | 45.04317630 | 54.13686812 |
| Zn | 49.03117675 | 39.38102719 | 53.04773916 |
| Zn | 50.24546732 | 43.28081812 | 52.28605386 |
| O  | 45.05062895 | 47.57632569 | 54.18697886 |
| O  | 41.00243705 | 51.64127063 | 54.26544857 |
| O  | 42.14465525 | 47.69825466 | 54.23949436 |
| O  | 43.70935927 | 50.17499629 | 52.56866890 |
| O  | 39.55560860 | 49.14413469 | 52.61784891 |
| Zn | 39.79236335 | 50.11037168 | 54.20662587 |
| Zn | 43.75510893 | 49.05415702 | 54.31856739 |
| Zn | 41.02600901 | 47.78962495 | 52.55903887 |
| Zn | 45.99671582 | 47.17767755 | 52.49402366 |
| Zn | 42.28050519 | 51.09482427 | 53.10958299 |
| O  | 45.13313690 | 39.63766779 | 57.52210717 |
| O  | 41.05664413 | 43.64160627 | 57.52202458 |
| O  | 42.20432029 | 39.62884970 | 57.52183137 |
| O  | 46.14092628 | 43.56014919 | 57.52272654 |
| O  | 43.60506403 | 42.15647552 | 55.86022394 |
| O  | 39.59860541 | 46.21986850 | 55.88701854 |
| O  | 43.58293629 | 45.08248457 | 55.88362258 |
| O  | 39.62832514 | 41.07838756 | 55.86911824 |
| Zn | 43.46428325 | 46.15405646 | 57.52283049 |
| Zn | 39.62695734 | 42.16533213 | 57.52176698 |
| Zn | 43.66254866 | 41.07511749 | 57.52206055 |
| Zn | 39.61268566 | 45.08219953 | 57.52192758 |

|    |             |             |             |
|----|-------------|-------------|-------------|
| Zn | 41.10393888 | 39.64440955 | 55.87415078 |
| Zn | 45.08591028 | 43.60242446 | 55.88215068 |
| Zn | 46.24442550 | 39.70175781 | 55.85435891 |
| Zn | 42.16546898 | 43.56353541 | 55.87697058 |
| O  | 49.07688507 | 43.64595701 | 57.52306785 |
| O  | 50.24631403 | 39.59771991 | 57.52251667 |
| O  | 51.49122948 | 42.14237260 | 55.89439561 |
| O  | 47.44367930 | 46.00875667 | 55.82974035 |
| O  | 47.69884560 | 41.06142192 | 55.89503486 |
| Zn | 47.60435721 | 42.15974741 | 57.52267371 |
| Zn | 51.30885361 | 41.19263318 | 57.52311666 |
| Zn | 47.66040082 | 45.07270976 | 57.52306235 |
| Zn | 49.26868509 | 39.57323943 | 55.90191688 |
| Zn | 50.01573046 | 43.31353526 | 55.81428395 |
| O  | 45.00370287 | 47.61155626 | 57.52353193 |
| O  | 40.92098812 | 51.58591426 | 57.52358779 |
| O  | 42.10139807 | 47.67082844 | 57.52250895 |
| O  | 43.47833840 | 50.16381526 | 55.87100324 |
| O  | 39.51279379 | 49.13185828 | 55.86153813 |
| Zn | 39.77706227 | 50.03623689 | 57.52251340 |
| Zn | 43.65260409 | 49.12170408 | 57.52334203 |
| Zn | 41.05032880 | 47.58878236 | 55.86144305 |
| Zn | 45.96323738 | 47.12098719 | 55.87519198 |
| Zn | 41.95443644 | 51.27149547 | 55.96673828 |
| O  | 45.12331728 | 39.60139304 | 60.82122398 |
| O  | 41.02657730 | 43.61780101 | 60.79727101 |
| O  | 42.19140838 | 39.61122134 | 60.82269123 |
| O  | 46.13648719 | 43.53535992 | 60.79646768 |
| O  | 43.60465933 | 42.15606336 | 59.18422468 |
| O  | 39.59787367 | 46.21952594 | 59.15711209 |
| O  | 43.58283613 | 45.08218974 | 59.16178536 |
| O  | 39.62832682 | 41.07828915 | 59.17440868 |
| Zn | 43.46236243 | 46.14592764 | 60.81273733 |
| Zn | 39.56782394 | 42.14300680 | 60.85379408 |
| Zn | 43.68435819 | 41.04569862 | 60.84925102 |
| Zn | 39.60219114 | 45.05678269 | 60.74592171 |
| Zn | 41.10402917 | 39.64442166 | 59.16945406 |
| Zn | 45.08555325 | 43.60200838 | 59.16304332 |
| Zn | 46.24441877 | 39.70130913 | 59.18980212 |
| Zn | 42.16524760 | 43.56334707 | 59.16715204 |
| O  | 49.07107328 | 43.61943088 | 60.88605455 |
| O  | 50.35409463 | 39.69666408 | 60.76554684 |
| O  | 51.49085192 | 42.14216499 | 59.15204783 |
| O  | 47.44275891 | 46.00834859 | 59.21661855 |
| O  | 47.69884715 | 41.06098172 | 59.14998160 |
| Zn | 47.63625614 | 42.16954541 | 60.76827835 |
| Zn | 51.37791599 | 41.33847666 | 60.92210636 |



|    |             |             |             |
|----|-------------|-------------|-------------|
| Zn | 47.67490592 | 45.04220398 | 60.90910011 |
| Zn | 49.26859464 | 39.57267077 | 59.14307071 |
| Zn | 50.01531767 | 43.31328573 | 59.23193895 |
| O  | 45.04984154 | 47.57590069 | 60.86071894 |
| O  | 41.00116379 | 51.64045958 | 60.78161326 |
| O  | 42.14362071 | 47.69681948 | 60.80531139 |
| O  | 43.47771294 | 50.16319260 | 59.17583954 |
| O  | 39.51209402 | 49.13149068 | 59.18322521 |
| Zn | 39.79063862 | 50.10979393 | 60.83805283 |
| Zn | 43.75382458 | 49.05351011 | 60.72848332 |
| Zn | 41.04979380 | 47.58814675 | 59.18321264 |
| Zn | 45.96238502 | 47.12077638 | 59.17255733 |
| Zn | 41.95397247 | 51.27115405 | 59.08093164 |
| O  | 45.14522184 | 39.67602415 | 64.09522437 |
| O  | 41.15499510 | 43.76250306 | 64.14630706 |
| O  | 42.26988203 | 39.67963974 | 64.11787042 |
| O  | 46.05342854 | 43.14470456 | 63.98893145 |
| O  | 43.56197677 | 42.11810208 | 62.49069699 |
| O  | 39.62252628 | 46.26144707 | 62.39704606 |
| O  | 43.54288629 | 45.02990415 | 62.40484407 |
| O  | 39.63156283 | 41.08033247 | 62.50806216 |
| Zn | 42.98532759 | 45.99560923 | 64.01300815 |
| Zn | 39.54210154 | 42.16440105 | 64.25715839 |
| Zn | 44.02640093 | 41.23793256 | 64.29675032 |
| Zn | 39.59523717 | 44.91864120 | 63.73127045 |
| Zn | 41.10291965 | 39.68309518 | 62.47646924 |
| Zn | 45.03474409 | 43.56025688 | 62.40165620 |
| Zn | 46.27438009 | 39.54782938 | 62.55956762 |
| Zn | 42.14277202 | 43.47361857 | 62.40215557 |
| O  | 49.00661792 | 43.59509888 | 64.12405115 |
| O  | 51.76898914 | 42.40732043 | 62.36566563 |
| O  | 47.36089119 | 45.92695263 | 62.61866045 |
| O  | 47.74405537 | 40.93844670 | 62.34430204 |
| Zn | 47.72963040 | 42.24634461 | 63.69748889 |
| Zn | 47.57332651 | 44.89899936 | 64.27204482 |
| Zn | 49.03129154 | 39.37972483 | 61.99721390 |
| Zn | 50.24272028 | 43.27957635 | 62.75932071 |
| O  | 45.25354635 | 47.85687158 | 64.22103709 |
| O  | 42.12666891 | 47.69065484 | 64.03469752 |
| O  | 43.70482896 | 50.17057293 | 62.47927519 |
| O  | 39.55476427 | 49.14360115 | 62.42715458 |
| Zn | 43.65751510 | 48.79993174 | 63.80610901 |
| Zn | 41.02506840 | 47.78936559 | 62.48528875 |
| Zn | 45.99585018 | 47.17939022 | 62.55471170 |
| Zn | 42.27703120 | 51.09198903 | 61.93902734 |
| O  | 35.61322207 | 33.98379572 | 65.63318689 |
| O  | 35.44274036 | 36.89476739 | 65.87584512 |

|    |             |             |             |
|----|-------------|-------------|-------------|
| O  | 32.69511178 | 34.09929947 | 65.96003664 |
| Zn | 33.95031593 | 32.80184030 | 65.48904749 |
| Zn | 36.76530599 | 35.63026567 | 65.46514044 |
| Zn | 34.02291635 | 35.54628765 | 65.72942966 |
| O  | 39.61738516 | 38.21418605 | 65.77665301 |
| Zn | 38.34124999 | 39.64637703 | 65.46924660 |
| O  | 43.85237946 | 42.35484777 | 65.87648721 |
| O  | 43.68227937 | 45.26614208 | 65.63312983 |
| O  | 39.67840894 | 41.03639914 | 65.77649324 |
| Zn | 40.95455068 | 39.60405859 | 65.46917611 |
| Zn | 45.27237421 | 43.70322124 | 65.72969851 |
| Zn | 42.53003970 | 43.61923097 | 65.46557923 |
| O  | 46.59941572 | 45.15086889 | 65.95927004 |
| Zn | 45.34399065 | 46.44829892 | 65.48794491 |

**BCT-324**

|    |             |             |             |
|----|-------------|-------------|-------------|
| O  | 30.01050187 | 27.36233903 | 50.83146592 |
| O  | 28.65683943 | 30.06294499 | 49.08657991 |
| Zn | 27.68518312 | 30.31619158 | 50.77874825 |
| Zn | 29.90890672 | 28.76427445 | 49.55680755 |
| O  | 33.13347197 | 27.51088333 | 51.01319953 |
| O  | 31.57717010 | 29.93871226 | 49.41502113 |
| Zn | 35.66287919 | 30.27868562 | 51.31526316 |
| Zn | 31.59865601 | 26.40532178 | 51.24245326 |
| Zn | 32.26549967 | 29.20263312 | 51.03513881 |
| O  | 29.19099266 | 32.04635042 | 51.06522410 |
| O  | 26.24822827 | 31.62042572 | 50.92348031 |
| O  | 30.12212867 | 35.53693256 | 50.95133706 |
| Zn | 27.52576898 | 32.96860136 | 51.35380297 |
| Zn | 29.98531262 | 31.50997499 | 49.32541174 |
| O  | 36.98550394 | 31.56367140 | 50.96649831 |
| O  | 32.97807616 | 35.51224628 | 50.93330604 |
| O  | 34.10829117 | 31.43715377 | 50.90403965 |
| O  | 38.20728872 | 35.58143554 | 50.96512719 |
| O  | 35.57810038 | 34.15603007 | 49.28280281 |
| O  | 35.62910097 | 36.97703982 | 49.27345752 |
| O  | 31.41012617 | 32.85172241 | 49.18371492 |
| Zn | 35.51921065 | 38.10716457 | 50.80702624 |
| Zn | 31.26349579 | 33.98820688 | 50.75366212 |
| Zn | 35.71714093 | 33.02727270 | 50.79683588 |
| Zn | 31.50249517 | 36.75858513 | 51.33046900 |
| Zn | 32.72915735 | 31.58103344 | 49.58635018 |
| Zn | 36.90498738 | 35.56018082 | 49.57988794 |
| Zn | 34.29683198 | 35.59182702 | 49.58391756 |
| O  | 30.20746332 | 27.63280442 | 54.18771152 |
| O  | 27.88808027 | 29.27996695 | 52.43029509 |

|    |             |             |             |
|----|-------------|-------------|-------------|
| Zn | 27.58199987 | 30.17215571 | 54.13763617 |
| Zn | 29.25848771 | 28.03507368 | 52.49598229 |
| O  | 33.11557077 | 27.50565411 | 54.24125492 |
| O  | 34.25308578 | 23.56574595 | 54.26725803 |
| O  | 38.26141474 | 27.64299378 | 54.28581677 |
| O  | 35.70822783 | 26.05856949 | 52.62250828 |
| O  | 31.71608375 | 30.17432316 | 52.64257976 |
| O  | 35.64091021 | 28.93815603 | 52.65311950 |
| O  | 31.54834467 | 25.03402204 | 52.56819920 |
| Zn | 35.65451623 | 30.14116114 | 54.30232254 |
| Zn | 31.49984419 | 26.15359006 | 54.31852976 |
| Zn | 35.46579600 | 25.09361346 | 54.21145599 |
| Zn | 31.79528257 | 29.05915028 | 54.23462562 |
| Zn | 32.97673180 | 24.11419538 | 53.10967269 |
| Zn | 36.95990534 | 27.43857632 | 52.98469300 |
| Zn | 34.23490092 | 27.41223647 | 52.56171878 |
| O  | 29.12302963 | 31.67424954 | 54.25133051 |
| O  | 24.91733705 | 35.52466447 | 54.28392352 |
| O  | 26.19038433 | 31.59900062 | 54.16185074 |
| O  | 30.14540052 | 35.60805264 | 54.22668193 |
| O  | 27.52151107 | 34.27870180 | 52.70315870 |
| O  | 27.59272500 | 37.08120797 | 52.62229380 |
| O  | 23.49085603 | 32.80720983 | 52.69384572 |
| Zn | 27.98024697 | 38.00538105 | 54.21597870 |
| Zn | 23.89261817 | 33.88689643 | 54.12717411 |
| Zn | 27.62829201 | 33.04805762 | 54.27933335 |
| Zn | 25.01603035 | 31.93608838 | 52.29051993 |
| Zn | 28.99589329 | 35.66610034 | 52.48852841 |
| Zn | 30.22509835 | 31.65344872 | 52.64559003 |
| Zn | 26.24190409 | 35.84689028 | 53.05599978 |
| O  | 37.10202074 | 31.55462210 | 54.22362077 |
| O  | 33.07072950 | 35.58356907 | 54.23400929 |
| O  | 34.23293542 | 31.57889957 | 54.25423314 |
| O  | 38.17878069 | 35.62535122 | 54.22362213 |
| O  | 35.61776181 | 34.10407881 | 52.54935831 |
| O  | 31.61887240 | 38.13863174 | 52.61648015 |
| O  | 35.58239508 | 37.00646063 | 52.55187673 |
| O  | 31.70089239 | 33.08654492 | 52.55972561 |
| Zn | 35.59944979 | 38.11388770 | 54.17916626 |
| Zn | 31.57690207 | 34.16054804 | 54.20272728 |
| Zn | 35.68341034 | 33.05195299 | 54.20521190 |
| Zn | 31.60924729 | 37.01389741 | 54.29453977 |
| Zn | 33.11570887 | 31.72806838 | 52.64729675 |
| Zn | 37.03367330 | 35.61215566 | 52.60347851 |
| Zn | 38.16124703 | 31.55364011 | 52.45952659 |
| Zn | 34.14364559 | 35.51707208 | 52.57621741 |
| O  | 30.25030767 | 27.59467084 | 57.52331292 |

|    |             |             |             |
|----|-------------|-------------|-------------|
| O  | 27.81237320 | 29.20237631 | 55.82964722 |
| Zn | 27.59648007 | 30.14010759 | 57.52303815 |
| Zn | 29.29129971 | 28.08943588 | 55.87474313 |
| O  | 33.15432552 | 27.53050528 | 57.52288497 |
| O  | 34.33155776 | 23.61847150 | 57.52277025 |
| O  | 38.21598393 | 27.68857871 | 57.52246926 |
| O  | 35.75057877 | 26.07383922 | 55.86495474 |
| O  | 31.67734284 | 30.12204029 | 55.88574394 |
| O  | 35.66128903 | 28.98333213 | 55.89347513 |
| O  | 31.77366854 | 25.04187636 | 55.87070618 |
| Zn | 35.64952760 | 30.12931963 | 57.52262630 |
| Zn | 31.59873466 | 26.08373024 | 57.52311851 |
| Zn | 35.47736828 | 25.16530633 | 57.52264457 |
| Zn | 31.79015403 | 29.04874760 | 57.52293274 |
| Zn | 33.29673180 | 23.93455524 | 55.96658540 |
| Zn | 37.19232546 | 27.55897957 | 55.92078939 |
| Zn | 34.20715810 | 27.61571514 | 55.86397012 |
| O  | 29.11737942 | 31.64679381 | 57.52272461 |
| O  | 25.02317549 | 35.62660469 | 57.52246466 |
| O  | 26.18479661 | 31.56991590 | 57.52286265 |
| O  | 30.14686329 | 35.57877850 | 57.52223239 |
| O  | 27.57060765 | 34.15575091 | 55.89736883 |
| O  | 27.57886080 | 37.02438414 | 55.86895025 |
| O  | 23.77370903 | 33.08065063 | 55.89626673 |
| Zn | 27.95997278 | 37.94636647 | 57.52202232 |
| Zn | 23.96082801 | 34.03409243 | 57.52277930 |
| Zn | 27.65979125 | 33.05524925 | 57.52256790 |
| Zn | 25.24597192 | 31.90646996 | 55.81541928 |
| Zn | 29.02773501 | 35.51541069 | 55.85961338 |
| Zn | 30.17346294 | 31.60829948 | 55.88409948 |
| Zn | 26.00756067 | 35.65384446 | 55.90568331 |
| O  | 37.09645867 | 31.56718819 | 57.52245718 |
| O  | 33.07750702 | 35.57283618 | 57.52235013 |
| O  | 34.21158458 | 31.57147087 | 57.52266664 |
| O  | 38.18864953 | 35.63894490 | 57.52229871 |
| O  | 35.65859156 | 34.13603764 | 55.87059183 |
| O  | 31.64607992 | 38.13053816 | 55.89442766 |
| O  | 35.61509020 | 37.04221214 | 55.86654280 |
| O  | 31.65711839 | 33.04677372 | 55.86570236 |
| Zn | 35.64765203 | 38.13066183 | 57.52218709 |
| Zn | 31.61089042 | 34.13936276 | 57.52244468 |
| Zn | 35.63610999 | 33.05093107 | 57.52245340 |
| Zn | 31.59716443 | 37.01604421 | 57.52210462 |
| Zn | 33.09171514 | 31.64008190 | 55.88282772 |
| Zn | 37.07865158 | 35.62537030 | 55.87648260 |
| Zn | 38.17289420 | 31.69568694 | 55.86321534 |
| Zn | 34.17326057 | 35.58062709 | 55.87367634 |

|    |             |             |             |
|----|-------------|-------------|-------------|
| O  | 30.20787967 | 27.63259588 | 60.85885731 |
| O  | 27.81256207 | 29.20229947 | 59.21633557 |
| Zn | 27.58234559 | 30.17187308 | 60.90856567 |
| Zn | 29.29136580 | 28.08918822 | 59.17230686 |
| O  | 33.11587946 | 27.50572341 | 60.80464500 |
| O  | 34.25352799 | 23.56610201 | 60.77838207 |
| O  | 38.26150768 | 27.64318320 | 60.75922224 |
| O  | 35.75069573 | 26.07391655 | 59.18029065 |
| O  | 31.67740777 | 30.12199617 | 59.16019169 |
| O  | 35.66138574 | 28.98340895 | 59.15186250 |
| O  | 31.77395885 | 25.04180067 | 59.17555054 |
| Zn | 35.65471912 | 30.14138676 | 60.74293214 |
| Zn | 31.50031721 | 26.15345634 | 60.72769289 |
| Zn | 35.46619797 | 25.09406052 | 60.83400858 |
| Zn | 31.79544452 | 29.05907117 | 60.81124755 |
| Zn | 33.29700554 | 23.93449718 | 59.07909000 |
| Zn | 37.19245266 | 27.55906379 | 59.12421852 |
| Zn | 34.20728733 | 27.61581181 | 59.18163355 |
| O  | 29.12323086 | 31.67408849 | 60.79420624 |
| O  | 24.91770377 | 35.52513386 | 60.76103098 |
| O  | 26.19076219 | 31.59884797 | 60.88376746 |
| O  | 30.14568004 | 35.60799682 | 60.81773088 |
| O  | 27.57072504 | 34.15572590 | 59.14788349 |
| O  | 27.57911290 | 37.02439962 | 59.17520351 |
| O  | 23.77392772 | 33.08070892 | 59.14936649 |
| Zn | 27.98047108 | 38.00550050 | 60.82805028 |
| Zn | 23.89306402 | 33.88736260 | 60.91833804 |
| Zn | 27.62863432 | 33.04793297 | 60.76580709 |
| Zn | 25.24609944 | 31.90645197 | 59.23044056 |
| Zn | 29.02784750 | 35.51539002 | 59.18489486 |
| Zn | 30.17350165 | 31.60820580 | 59.16135918 |
| Zn | 26.00776102 | 35.65400142 | 59.13908735 |
| O  | 37.10216813 | 31.55483185 | 60.82133665 |
| O  | 33.07087138 | 35.58359557 | 60.81070182 |
| O  | 34.23300765 | 31.57907157 | 60.79111995 |
| O  | 38.17886489 | 35.62542712 | 60.82096881 |
| O  | 35.65864856 | 34.13607236 | 59.17425810 |
| O  | 31.64600564 | 38.13058889 | 59.14977842 |
| O  | 35.61515648 | 37.04225483 | 59.17785553 |
| O  | 31.65710726 | 33.04674757 | 59.17922670 |
| Zn | 35.59941907 | 38.11402045 | 60.86515860 |
| Zn | 31.57708728 | 34.16048603 | 60.84220292 |
| Zn | 35.68350719 | 33.05211800 | 60.83977256 |
| Zn | 31.60946753 | 37.01395466 | 60.74964840 |
| Zn | 33.09178182 | 31.64014141 | 59.16254785 |
| Zn | 37.07869862 | 35.62539200 | 59.16815622 |
| Zn | 38.17295359 | 31.69580103 | 59.18167597 |

|    |             |             |             |
|----|-------------|-------------|-------------|
| Zn | 34.17333225 | 35.58064324 | 59.17094893 |
| O  | 30.01301809 | 27.36263885 | 64.21538500 |
| O  | 27.88804553 | 29.27909982 | 62.61569424 |
| Zn | 27.68626867 | 30.31673827 | 64.26681990 |
| Zn | 29.25923755 | 28.03496524 | 62.55152998 |
| O  | 33.13420109 | 27.51096496 | 64.03294208 |
| O  | 35.70852864 | 26.05892264 | 62.42302438 |
| O  | 31.71645008 | 30.17433181 | 62.40336190 |
| O  | 35.64118455 | 28.93851715 | 62.39219561 |
| O  | 31.54913158 | 25.03333325 | 62.47808719 |
| Zn | 35.66309071 | 30.27916351 | 63.72998130 |
| Zn | 31.60042033 | 26.40413031 | 63.80407205 |
| Zn | 32.26391642 | 29.20147210 | 64.01062167 |
| Zn | 32.97739252 | 24.11377712 | 61.93620160 |
| Zn | 36.96017787 | 27.43879004 | 62.06046988 |
| Zn | 34.23527867 | 27.41283163 | 62.48399484 |
| O  | 29.18990117 | 32.04392445 | 63.97997067 |
| O  | 26.24858053 | 31.62056930 | 64.12198551 |
| O  | 30.12268864 | 35.53711918 | 64.09318998 |
| O  | 27.52209427 | 34.27880799 | 62.34200293 |
| O  | 27.59345424 | 37.08142196 | 62.42196354 |
| O  | 23.49174799 | 32.80824191 | 62.35207683 |
| Zn | 27.52584970 | 32.96890969 | 63.69138845 |
| Zn | 25.01622839 | 31.93622957 | 62.75524648 |
| Zn | 28.99655280 | 35.66639705 | 62.55591239 |
| Zn | 30.22540460 | 31.65340767 | 62.39989988 |
| Zn | 26.24253933 | 35.84695683 | 61.98882070 |
| O  | 36.98579483 | 31.56421448 | 64.07851837 |
| O  | 32.97843607 | 35.51290892 | 64.11148214 |
| O  | 34.10906150 | 31.43847403 | 64.14120408 |
| O  | 38.20749255 | 35.58170945 | 64.07945529 |
| O  | 35.61794055 | 34.10436070 | 62.49551584 |
| O  | 31.61883859 | 38.13882082 | 62.42763307 |
| O  | 35.58260766 | 37.00670392 | 62.49250501 |
| O  | 31.70084975 | 33.08660457 | 62.48540507 |
| Zn | 35.51921172 | 38.10745126 | 64.23724559 |
| Zn | 31.26466193 | 33.98896815 | 64.29131214 |
| Zn | 35.71703465 | 33.02759520 | 64.24821648 |
| Zn | 31.50279033 | 36.75906323 | 63.71389699 |
| Zn | 33.11590158 | 31.72804565 | 62.39818311 |
| Zn | 37.03385671 | 35.61231378 | 62.44116277 |
| Zn | 38.16138397 | 31.55391976 | 62.58549423 |
| Zn | 34.14393859 | 35.51733433 | 62.46839771 |
| O  | 41.05110328 | 35.64565326 | 50.93904205 |
| O  | 39.62483668 | 38.21427583 | 49.28008859 |
| Zn | 43.77049389 | 38.41325919 | 51.33386372 |
| Zn | 39.73473835 | 34.36636902 | 51.33136738 |

|    |             |             |             |
|----|-------------|-------------|-------------|
| Zn | 39.73615202 | 37.09026420 | 50.81267428 |
| O  | 39.60915393 | 30.17769742 | 52.59907204 |
| Zn | 39.27074670 | 29.23237660 | 54.18944595 |
| O  | 41.08178754 | 35.60522428 | 54.21481706 |
| O  | 42.20413124 | 31.70413902 | 54.29767428 |
| O  | 46.21255713 | 35.74053875 | 54.30835252 |
| O  | 43.60688629 | 34.22578298 | 52.61573116 |
| O  | 39.66590661 | 38.17740306 | 52.56075085 |
| O  | 43.63533453 | 37.07203263 | 52.64571237 |
| O  | 39.60696429 | 33.01845829 | 52.63972841 |
| Zn | 43.65049042 | 38.24573382 | 54.29532771 |
| Zn | 39.62028543 | 34.19445572 | 54.29260631 |
| Zn | 43.23032070 | 33.27377445 | 54.19446837 |
| Zn | 39.65129867 | 37.08091287 | 54.18848172 |
| Zn | 40.89736763 | 31.47672161 | 53.01038172 |
| Zn | 44.90791045 | 35.50643664 | 53.02275156 |
| Zn | 42.17772952 | 35.61820446 | 52.46656204 |
| O  | 47.62002744 | 38.25913121 | 52.61663717 |
| Zn | 47.24609283 | 37.30481713 | 54.19385876 |
| O  | 39.65304289 | 30.17486464 | 55.87540439 |
| Zn | 39.28413823 | 29.23915041 | 57.52250049 |
| O  | 41.08987830 | 35.62701260 | 57.52234308 |
| O  | 42.16436840 | 31.75323594 | 57.52240500 |
| O  | 46.15260867 | 35.77796630 | 57.52224422 |
| O  | 43.62926313 | 34.22556499 | 55.87622077 |
| O  | 39.67203889 | 38.17154171 | 55.86140275 |
| O  | 43.61573188 | 37.11284283 | 55.88930465 |
| O  | 39.61879647 | 33.06830420 | 55.89456805 |
| Zn | 43.64537823 | 38.22203002 | 57.52228365 |
| Zn | 39.63794111 | 34.19199974 | 57.52236049 |
| Zn | 43.23971436 | 33.29059370 | 57.52235180 |
| Zn | 39.63139115 | 37.09545250 | 57.52227599 |
| Zn | 41.12751416 | 31.58262008 | 55.93215055 |
| Zn | 45.11643949 | 35.61116037 | 55.93159289 |
| Zn | 42.15765838 | 35.74618658 | 55.85427270 |
| O  | 47.64516575 | 38.24237694 | 55.88318901 |
| Zn | 47.24665687 | 37.29927358 | 57.52218870 |
| O  | 39.65309756 | 30.17493709 | 59.16948081 |
| Zn | 39.27082774 | 29.23258756 | 60.85555432 |
| O  | 41.08186289 | 35.60533759 | 60.82989995 |
| O  | 42.20421914 | 31.70418137 | 60.74714493 |
| O  | 46.21263942 | 35.74041460 | 60.73614603 |
| O  | 43.62929877 | 34.22555403 | 59.16846308 |
| O  | 39.67204686 | 38.17157677 | 59.18312037 |
| O  | 43.61578982 | 37.11281838 | 59.15525239 |
| O  | 39.61888226 | 33.06838616 | 59.15020994 |
| Zn | 43.65051999 | 38.24571605 | 60.74922903 |

|    |             |             |             |
|----|-------------|-------------|-------------|
| Zn | 39.62039063 | 34.19456021 | 60.75217657 |
| Zn | 43.23042778 | 33.27380926 | 60.85027329 |
| Zn | 39.65133289 | 37.08098626 | 60.85605939 |
| Zn | 41.12756314 | 31.58270820 | 59.11269109 |
| Zn | 45.11651180 | 35.61112809 | 59.11294044 |
| Zn | 42.15769445 | 35.74618215 | 59.19040032 |
| O  | 47.64513866 | 38.24229473 | 59.16123184 |
| Zn | 47.24614447 | 37.30471495 | 60.85054860 |
| O  | 39.60925784 | 30.17789572 | 62.44588639 |
| O  | 41.05128917 | 35.64592818 | 64.10567019 |
| O  | 43.60701104 | 34.22584093 | 62.42898411 |
| O  | 39.66583780 | 38.17750425 | 62.48375970 |
| O  | 43.63545484 | 37.07202615 | 62.39884938 |
| O  | 39.60720484 | 33.01866614 | 62.40507216 |
| Zn | 43.77048679 | 38.41320456 | 63.71073032 |
| Zn | 39.73496557 | 34.36658832 | 63.71342201 |
| Zn | 39.73619028 | 37.09046503 | 64.23184588 |
| Zn | 40.89748651 | 31.47688694 | 62.03447653 |
| Zn | 44.90804174 | 35.50645047 | 62.02182384 |
| Zn | 42.17786285 | 35.61826801 | 62.57812315 |
| O  | 47.61991665 | 38.25894321 | 62.42786477 |
| O  | 37.04617714 | 39.60397092 | 50.96667504 |
| O  | 34.21321882 | 39.55489095 | 50.93234878 |
| O  | 38.24422925 | 43.60451873 | 50.93886302 |
| Zn | 35.52498015 | 40.83674696 | 51.33371307 |
| Zn | 38.34642912 | 39.63798798 | 49.58165821 |
| O  | 29.06294719 | 39.53925292 | 54.30964422 |
| Zn | 30.36051155 | 39.71378599 | 53.00779220 |
| O  | 37.08118006 | 39.56103798 | 54.22994329 |
| O  | 33.08291875 | 43.50925828 | 54.30818625 |
| O  | 34.18308789 | 39.59361725 | 54.21170190 |
| O  | 38.21372434 | 43.64495109 | 54.21467700 |
| O  | 35.66016635 | 42.17800117 | 52.64554807 |
| O  | 35.68853656 | 45.02431273 | 52.61563228 |
| O  | 31.67524865 | 40.99085006 | 52.61636182 |
| Zn | 36.06522668 | 45.97644211 | 54.19428898 |
| Zn | 32.04928269 | 41.94503733 | 54.19358316 |
| Zn | 35.64493887 | 41.00432341 | 54.29518501 |
| Zn | 33.08430565 | 39.58688562 | 52.45938576 |
| Zn | 37.11767700 | 43.63187918 | 52.46646261 |
| Zn | 38.21119794 | 39.58661476 | 52.60747654 |
| Zn | 34.38753578 | 43.74365780 | 53.02262791 |
| O  | 37.09144471 | 47.54602639 | 54.29753919 |
| Zn | 38.39836077 | 47.77345785 | 53.01039346 |
| O  | 29.10250342 | 39.44370415 | 57.52194428 |
| Zn | 30.14527382 | 39.63671794 | 55.94000440 |
| O  | 37.10159620 | 39.57388850 | 57.52221473 |



|    |             |             |             |
|----|-------------|-------------|-------------|
| O  | 33.14272654 | 43.47194923 | 57.52200854 |
| O  | 34.19473483 | 39.59365391 | 57.52205870 |
| O  | 38.20561808 | 43.62313721 | 57.52219844 |
| O  | 35.67978122 | 42.13726471 | 55.88914176 |
| O  | 35.66614007 | 45.02453768 | 55.87600307 |
| O  | 31.65017351 | 41.00748863 | 55.88290440 |
| Zn | 36.05576333 | 45.95948700 | 57.52212370 |
| Zn | 32.04862440 | 41.95065997 | 57.52187554 |
| Zn | 35.65017326 | 41.02805422 | 57.52211726 |
| Zn | 33.11116312 | 39.48409132 | 55.86033076 |
| Zn | 37.13781992 | 43.50396720 | 55.85411671 |
| Zn | 38.19662566 | 39.59616612 | 55.86872397 |
| Zn | 34.17900328 | 43.63879092 | 55.93141538 |
| O  | 37.13119129 | 47.49678163 | 57.52225871 |
| Zn | 38.16813303 | 47.66748485 | 55.93205822 |
| O  | 29.06286251 | 39.53959044 | 60.73428043 |
| Zn | 30.14520850 | 39.63682642 | 59.10390615 |
| O  | 37.08113826 | 39.56117313 | 60.81447381 |
| O  | 33.08274879 | 43.50943728 | 60.73584830 |
| O  | 34.18301562 | 39.59369682 | 60.83236598 |
| O  | 38.21359140 | 43.64485431 | 60.82972722 |
| O  | 35.67969524 | 42.13730994 | 59.15505650 |
| O  | 35.66606195 | 45.02454003 | 59.16824040 |
| O  | 31.65011544 | 41.00758005 | 59.16090091 |
| Zn | 36.06496116 | 45.97642905 | 60.84997700 |
| Zn | 32.04915187 | 41.94518044 | 60.85020366 |
| Zn | 35.64486679 | 41.00440131 | 60.74903040 |
| Zn | 33.11109156 | 39.48416696 | 59.18373273 |
| Zn | 37.13774075 | 43.50399640 | 59.19022095 |
| Zn | 38.19661359 | 39.59617203 | 59.17571347 |
| Zn | 34.17889820 | 43.63884320 | 59.11267330 |
| O  | 37.09123113 | 47.54600029 | 60.74696677 |
| Zn | 38.16803279 | 47.66742721 | 59.11253205 |
| Zn | 30.36046475 | 39.71387365 | 62.03615221 |
| O  | 37.04611459 | 39.60432209 | 64.07775885 |
| O  | 34.21307925 | 39.55504059 | 64.11174148 |
| O  | 38.24386936 | 43.60432787 | 64.10554880 |
| O  | 35.65989497 | 42.17809979 | 62.39865564 |
| O  | 35.68827695 | 45.02433779 | 62.42865060 |
| O  | 31.67522773 | 40.99098283 | 62.42746194 |
| Zn | 35.52489915 | 40.83693725 | 63.71058353 |
| Zn | 33.08429659 | 39.58717090 | 62.58461550 |
| Zn | 37.11742932 | 43.63189706 | 62.57787304 |
| Zn | 38.21114493 | 39.58670433 | 62.43694629 |
| Zn | 34.38728216 | 43.74369857 | 62.02151466 |
| Zn | 38.39802037 | 47.77324459 | 62.03426554 |
| O  | 45.08224372 | 39.69515807 | 50.93258754 |

|    |             |             |             |
|----|-------------|-------------|-------------|
| O  | 41.08796331 | 43.66855524 | 50.96532554 |
| O  | 42.24926287 | 39.64595563 | 50.96682579 |
| O  | 46.31706799 | 43.73736369 | 50.93312714 |
| O  | 43.66587674 | 42.27258753 | 49.27354829 |
| O  | 43.71707395 | 45.09365835 | 49.28270932 |
| O  | 39.67068592 | 41.03592685 | 49.28011878 |
| Zn | 43.57886142 | 46.22287020 | 50.79652161 |
| Zn | 39.55926054 | 42.15990089 | 50.81274457 |
| Zn | 43.77604423 | 41.14274557 | 50.80730220 |
| Zn | 39.56054624 | 44.88380833 | 51.33128713 |
| Zn | 40.94911639 | 39.61222553 | 49.58168017 |
| Zn | 44.99818691 | 43.65772528 | 49.58386263 |
| Zn | 42.39018221 | 43.68974467 | 49.58002810 |
| O  | 49.17281317 | 43.71324406 | 50.95139860 |
| O  | 47.88545546 | 46.39854016 | 49.18455085 |
| Zn | 51.77080797 | 46.28169706 | 51.35404597 |
| Zn | 47.79283266 | 42.49115862 | 51.33062516 |
| Zn | 48.03046279 | 45.26117454 | 50.75357284 |
| O  | 45.18671528 | 47.81147200 | 50.90383481 |
| O  | 42.31015310 | 47.68628353 | 50.96643644 |
| O  | 46.16169246 | 51.73957728 | 51.01250244 |
| Zn | 43.63293813 | 48.97121219 | 51.31508652 |
| Zn | 46.56643943 | 47.66979434 | 49.58667673 |
| O  | 53.04775567 | 47.63027143 | 50.92380925 |
| O  | 49.28262800 | 51.88708430 | 50.83051919 |
| O  | 50.10684560 | 47.20728651 | 51.06546592 |
| O  | 50.63911228 | 49.18759288 | 49.08518622 |
| O  | 47.71844688 | 49.31138023 | 49.41445912 |
| Zn | 47.03241565 | 50.04928615 | 51.03487918 |
| Zn | 51.60944304 | 48.93373356 | 50.77888131 |
| Zn | 47.69556347 | 52.84629931 | 51.24178383 |
| Zn | 49.31033726 | 47.74002974 | 49.32543828 |
| Zn | 49.38705669 | 50.48601184 | 49.55484522 |
| O  | 45.11237121 | 39.65643560 | 54.21195377 |
| O  | 41.11671070 | 43.62474531 | 54.22372055 |
| O  | 42.21428883 | 39.68903343 | 54.22998161 |
| O  | 46.22472251 | 43.66656326 | 54.23397663 |
| O  | 43.71291215 | 42.24351633 | 52.55203390 |
| O  | 39.68857000 | 46.23168187 | 52.63965826 |
| O  | 43.67771734 | 45.14585621 | 52.54928213 |
| O  | 39.62947096 | 41.07266771 | 52.56076059 |
| Zn | 43.61226556 | 46.19807486 | 54.20503895 |
| Zn | 39.64418941 | 42.16925028 | 54.18846916 |
| Zn | 43.69601584 | 41.13616692 | 54.17932224 |
| Zn | 39.67522422 | 45.05568234 | 54.29250084 |
| Zn | 41.08415324 | 39.66347807 | 52.60758721 |
| Zn | 45.15158409 | 43.73288805 | 52.57628712 |

|    |             |             |             |
|----|-------------|-------------|-------------|
| Zn | 46.21104589 | 39.66313589 | 52.45969418 |
| Zn | 42.26175072 | 43.63803986 | 52.60355575 |
| O  | 49.14985954 | 43.64209005 | 54.22684711 |
| O  | 50.23251339 | 39.71038883 | 54.30989898 |
| O  | 54.37777493 | 43.72504040 | 54.28373509 |
| O  | 51.70197049 | 42.16884443 | 52.62242983 |
| O  | 47.59497719 | 46.16359761 | 52.55940990 |
| O  | 51.77354764 | 44.97146354 | 52.70303222 |
| O  | 47.67659688 | 41.11131862 | 52.61679344 |
| Zn | 51.66704714 | 46.20225292 | 54.27939907 |
| Zn | 47.68605157 | 42.23617139 | 54.29484228 |
| Zn | 51.31468916 | 41.24457185 | 54.21618114 |
| Zn | 47.71851404 | 45.08965290 | 54.20263648 |
| Zn | 48.93487713 | 39.53609232 | 53.00803489 |
| Zn | 53.05290965 | 43.40299534 | 53.05603810 |
| Zn | 50.29899569 | 43.58407425 | 52.48864933 |
| O  | 55.80408883 | 46.44279240 | 52.69403908 |
| Zn | 55.40229949 | 45.36275141 | 54.12677335 |
| O  | 45.06282436 | 47.67102744 | 54.25391423 |
| O  | 41.03443710 | 51.60705500 | 54.28593941 |
| O  | 42.19367515 | 47.69535691 | 54.22361513 |
| O  | 46.18004373 | 51.74437963 | 54.24096981 |
| O  | 43.65478825 | 50.31173897 | 52.65303813 |
| O  | 43.58753202 | 53.19142444 | 52.62243367 |
| O  | 39.68663485 | 49.07241925 | 52.59910181 |
| Zn | 43.82990189 | 54.15608609 | 54.21152403 |
| Zn | 40.02508812 | 50.01768462 | 54.18946660 |
| Zn | 43.64116341 | 49.10877100 | 54.30221882 |
| Zn | 41.13448828 | 47.69640849 | 52.45939785 |
| Zn | 45.06063715 | 51.83738140 | 52.56153209 |
| Zn | 46.18000111 | 47.52232326 | 52.64687268 |
| Zn | 42.33581536 | 51.81150893 | 52.98471792 |
| O  | 53.10485642 | 47.65137066 | 54.16185318 |
| O  | 49.08795378 | 51.61735332 | 54.18713120 |
| O  | 50.17237402 | 47.57591028 | 54.25115299 |
| O  | 51.40785158 | 49.97130651 | 52.43008854 |
| O  | 47.74730570 | 54.21696396 | 52.56779640 |
| O  | 47.57944748 | 49.07592586 | 52.64195982 |
| Zn | 47.50048609 | 50.19093882 | 54.23430581 |
| Zn | 51.71325664 | 49.07838757 | 54.13716463 |
| Zn | 47.79562597 | 53.09652789 | 54.31819686 |
| Zn | 49.07050828 | 47.59666515 | 52.64524041 |
| Zn | 54.28000142 | 47.31483930 | 52.29080582 |
| Zn | 50.03661646 | 51.21534924 | 52.49448730 |
| O  | 45.04247277 | 55.68420571 | 54.26756673 |
| Zn | 46.31882340 | 55.13636313 | 53.10983741 |
| O  | 45.10082476 | 39.65642658 | 57.52226603 |

|    |             |             |             |
|----|-------------|-------------|-------------|
| O  | 41.10690522 | 43.61120692 | 57.52232922 |
| O  | 42.19399507 | 39.67620160 | 57.52226751 |
| O  | 46.21801167 | 43.67717031 | 57.52240300 |
| O  | 43.68044934 | 42.20787223 | 55.86665024 |
| O  | 39.67678771 | 46.18179831 | 55.89452462 |
| O  | 43.63699548 | 45.11403468 | 55.87053159 |
| O  | 39.62352454 | 41.07860187 | 55.86139209 |
| Zn | 43.65949276 | 46.19907764 | 57.52242590 |
| Zn | 39.66415659 | 42.15474026 | 57.52224939 |
| Zn | 43.64790835 | 41.11943949 | 57.52228892 |
| Zn | 39.65761466 | 45.05810598 | 57.52230249 |
| Zn | 41.09893548 | 39.65399353 | 55.86880513 |
| Zn | 45.12224972 | 43.66949415 | 55.87372900 |
| Zn | 46.18432430 | 39.76588538 | 55.86053112 |
| Zn | 42.21690934 | 43.62476323 | 55.87651541 |
| O  | 49.14858188 | 43.67115716 | 57.52237037 |
| O  | 50.19290693 | 39.80588433 | 57.52221696 |
| O  | 54.27204445 | 43.62252878 | 57.52238621 |
| O  | 51.71617647 | 42.22550317 | 55.86912009 |
| O  | 47.63844188 | 46.20327603 | 55.86566759 |
| O  | 51.72485125 | 45.09421144 | 55.89725701 |
| O  | 47.64952614 | 41.11937260 | 55.89462118 |
| Zn | 51.63560764 | 46.19466183 | 57.52262337 |
| Zn | 47.69829870 | 42.23390027 | 57.52231287 |
| Zn | 51.33520220 | 41.30338106 | 57.52217585 |
| Zn | 47.68468086 | 45.11063037 | 57.52243727 |
| Zn | 49.15011926 | 39.61298951 | 55.94029648 |
| Zn | 53.28760533 | 43.59595397 | 55.90567770 |
| Zn | 50.26761797 | 43.73459888 | 55.85971049 |
| O  | 55.52110181 | 46.16880673 | 55.89617138 |
| Zn | 55.33421905 | 45.21519888 | 57.52260117 |
| O  | 45.08406225 | 47.67847836 | 57.52252027 |
| O  | 41.07967852 | 51.56148089 | 57.52263549 |
| O  | 42.19919313 | 47.68284273 | 57.52249455 |
| O  | 46.14122319 | 51.71936678 | 57.52278856 |
| O  | 43.63441460 | 50.26666528 | 55.89339962 |
| O  | 43.54517562 | 53.17622475 | 55.86515549 |
| O  | 39.64260976 | 49.07520394 | 55.87539686 |
| Zn | 43.81856964 | 54.08471278 | 57.52286400 |
| Zn | 40.01151539 | 50.01091327 | 57.52249237 |
| Zn | 43.64613080 | 49.12068566 | 57.52258784 |
| Zn | 41.12279162 | 47.55433701 | 55.86321843 |
| Zn | 45.08856705 | 51.63417783 | 55.86386772 |
| Zn | 46.20377088 | 47.60985400 | 55.88263638 |
| Zn | 42.10339292 | 51.69117051 | 55.92100517 |
| O  | 53.11051513 | 47.67996899 | 57.52280482 |
| O  | 49.04522034 | 51.65514476 | 57.52291461 |

|    |             |             |             |
|----|-------------|-------------|-------------|
| O  | 50.17799003 | 47.60298865 | 57.52270141 |
| O  | 51.48280707 | 50.04750401 | 55.82955327 |
| O  | 47.52206208 | 54.20796344 | 55.87048575 |
| O  | 47.61821365 | 49.12801918 | 55.88539558 |
| Zn | 47.50537969 | 50.20107786 | 57.52276736 |
| Zn | 51.69875119 | 49.10978143 | 57.52284283 |
| Zn | 47.69683119 | 53.16603121 | 57.52294984 |
| Zn | 49.12209014 | 47.64179516 | 55.88394370 |
| Zn | 54.04931636 | 47.34355841 | 55.81532720 |
| Zn | 50.00416197 | 51.16083665 | 55.87403258 |
| O  | 44.96443616 | 55.63152383 | 57.52300179 |
| Zn | 45.99910090 | 55.31547543 | 55.96672777 |
| O  | 45.11239201 | 39.65642511 | 60.83256692 |
| O  | 41.11660670 | 43.62474707 | 60.82091303 |
| O  | 42.21428045 | 39.68898000 | 60.81456178 |
| O  | 46.22457945 | 43.66637837 | 60.81086925 |
| O  | 43.68041244 | 42.20783409 | 59.17793664 |
| O  | 39.67668959 | 46.18176339 | 59.15011241 |
| O  | 43.63695543 | 45.11398544 | 59.17428077 |
| O  | 39.62350979 | 41.07859579 | 59.18310240 |
| Zn | 43.61203250 | 46.19792994 | 60.83985461 |
| Zn | 39.64411820 | 42.16922046 | 60.85601637 |
| Zn | 43.69599639 | 41.13610583 | 60.86524108 |
| Zn | 39.67506219 | 45.05559473 | 60.75208985 |
| Zn | 41.09893246 | 39.65401252 | 59.17573353 |
| Zn | 45.12220998 | 43.66945084 | 59.17105145 |
| Zn | 46.18433376 | 39.76582368 | 59.18399874 |
| Zn | 42.21686640 | 43.62471778 | 59.16817010 |
| O  | 49.14976418 | 43.64190411 | 60.81789459 |
| O  | 50.23245632 | 39.70993184 | 60.73456207 |
| O  | 54.37765498 | 43.72394100 | 60.76106929 |
| O  | 51.71603364 | 42.22525640 | 59.17544494 |
| O  | 47.63837040 | 46.20315641 | 59.17932105 |
| O  | 51.72487937 | 45.09401118 | 59.14785246 |
| O  | 47.64955814 | 41.11929773 | 59.14998761 |
| Zn | 51.66674306 | 46.20178571 | 60.76583740 |
| Zn | 47.68589723 | 42.23597873 | 60.74986492 |
| Zn | 51.31463603 | 41.24408770 | 60.82822591 |
| Zn | 47.71842113 | 45.08942052 | 60.84226962 |
| Zn | 49.15013542 | 39.61285759 | 59.10413438 |
| Zn | 53.28753921 | 43.59555587 | 59.13906080 |
| Zn | 50.26758511 | 43.73441245 | 59.18504294 |
| O  | 55.52086166 | 46.16833464 | 59.14942396 |
| Zn | 55.40201859 | 45.36164569 | 60.91850751 |
| O  | 45.06263560 | 47.67082066 | 60.79113812 |
| O  | 41.03430328 | 51.60684693 | 60.75933353 |
| O  | 42.19345940 | 47.69519393 | 60.82141138 |

|    |             |             |             |
|----|-------------|-------------|-------------|
| O  | 46.17980543 | 51.74406852 | 60.80457045 |
| O  | 43.63429021 | 50.26657057 | 59.15183375 |
| O  | 43.54509822 | 53.17612148 | 59.18050051 |
| O  | 39.64250103 | 49.07516299 | 59.16951319 |
| Zn | 43.82963305 | 54.15594230 | 60.83420716 |
| Zn | 40.02486507 | 50.01748533 | 60.85553917 |
| Zn | 43.64097979 | 49.10861311 | 60.74294370 |
| Zn | 41.12269121 | 47.55428394 | 59.18172156 |
| Zn | 45.08846788 | 51.63403953 | 59.18163232 |
| Zn | 46.20365129 | 47.60969845 | 59.16249569 |
| Zn | 42.10329880 | 51.69108268 | 59.12433138 |
| O  | 53.10470989 | 47.65107642 | 60.88376934 |
| O  | 49.08775438 | 51.61697746 | 60.85868683 |
| O  | 50.17219308 | 47.57546233 | 60.79424123 |
| O  | 51.48266832 | 50.04725638 | 59.21625851 |
| O  | 47.52197699 | 54.20783313 | 59.17543062 |
| O  | 47.61812000 | 49.12787348 | 59.16008421 |
| Zn | 47.50021549 | 50.19064724 | 60.81125031 |
| Zn | 51.71283246 | 49.07800015 | 60.90852763 |
| Zn | 47.79548854 | 53.09619582 | 60.72763292 |
| Zn | 49.12197630 | 47.64167733 | 59.16135798 |
| Zn | 54.04917546 | 47.34316764 | 59.23019362 |
| Zn | 50.00406308 | 51.16062799 | 59.17179274 |
| O  | 45.04264811 | 55.68363120 | 60.77855716 |
| Zn | 45.99909428 | 55.31537821 | 59.07926326 |
| O  | 45.08221970 | 39.69513483 | 64.11195350 |
| O  | 41.08769005 | 43.66849777 | 64.07937556 |
| O  | 42.24917045 | 39.64580020 | 64.07777156 |
| O  | 46.31675636 | 43.73689676 | 64.11177780 |
| O  | 43.71264031 | 42.24338959 | 62.49257613 |
| O  | 39.68826138 | 46.23150567 | 62.40495879 |
| O  | 43.67757986 | 45.14569090 | 62.49557634 |
| O  | 39.62945908 | 41.07268715 | 62.48374489 |
| Zn | 43.57861222 | 46.22256314 | 64.24841636 |
| Zn | 39.55907301 | 42.15982631 | 64.23171919 |
| Zn | 43.77589165 | 41.14262748 | 64.23726414 |
| Zn | 39.56021939 | 44.88364934 | 63.71336171 |
| Zn | 41.08412837 | 39.66348179 | 62.43695133 |
| Zn | 45.15138811 | 43.73268615 | 62.46854642 |
| Zn | 46.21097866 | 39.66295520 | 62.58480050 |
| Zn | 42.26150758 | 43.63795900 | 62.44117784 |
| O  | 49.17263989 | 43.71271854 | 64.09342510 |
| O  | 51.70165470 | 42.16813333 | 62.42219320 |
| O  | 47.59466817 | 46.16315209 | 62.48564281 |
| O  | 51.77344717 | 44.97078820 | 62.34201112 |
| O  | 47.67658742 | 41.11108492 | 62.42783680 |
| Zn | 51.77039000 | 46.28059433 | 63.69138780 |

|    |             |             |             |
|----|-------------|-------------|-------------|
| Zn | 47.79250432 | 42.49079284 | 63.71424507 |
| Zn | 48.03056797 | 45.26081720 | 64.29137111 |
| Zn | 48.93482770 | 39.53592843 | 62.03655756 |
| Zn | 53.05269151 | 43.40226670 | 61.98881613 |
| Zn | 50.29874728 | 43.58338221 | 62.55609774 |
| O  | 55.80340069 | 46.44149748 | 62.35160305 |
| O  | 45.18640350 | 47.81110408 | 64.14128499 |
| O  | 42.30976790 | 47.68592814 | 64.07858249 |
| O  | 46.16148414 | 51.73913381 | 64.03288619 |
| O  | 43.65456900 | 50.31147142 | 62.39220253 |
| O  | 43.58724818 | 53.19111580 | 62.42320541 |
| O  | 39.68625536 | 49.07219262 | 62.44581680 |
| Zn | 43.63253455 | 48.97087740 | 63.73008812 |
| Zn | 41.13413584 | 47.69620342 | 62.58557545 |
| Zn | 45.06037790 | 51.83715723 | 62.48392803 |
| Zn | 46.17970522 | 47.52188342 | 62.39824722 |
| Zn | 42.33555891 | 51.81127674 | 62.06062632 |
| O  | 53.04714257 | 47.62936778 | 64.12169008 |
| O  | 49.28262333 | 51.88655173 | 64.21574158 |
| O  | 50.10621603 | 47.20589548 | 63.98000125 |
| O  | 51.40698776 | 49.97033440 | 62.61577419 |
| O  | 47.74675191 | 54.21638637 | 62.47813848 |
| O  | 47.57916378 | 49.07546411 | 62.40349523 |
| Zn | 47.03131995 | 50.04838464 | 64.01054389 |
| Zn | 51.60887102 | 48.93260872 | 64.26676314 |
| Zn | 47.69557446 | 52.84556021 | 63.80407017 |
| Zn | 49.07027904 | 47.59620296 | 62.40012289 |
| Zn | 54.27862600 | 47.31399122 | 62.75369407 |
| Zn | 50.03605012 | 51.21471493 | 62.55159394 |
| Zn | 46.31859866 | 55.13603334 | 61.93645633 |
| O  | 28.65730583 | 30.06325517 | 65.96038224 |
| Zn | 29.90929748 | 28.76453948 | 65.49057395 |
| O  | 31.57731220 | 29.93924954 | 65.63087395 |
| Zn | 29.98597316 | 31.51046927 | 65.71989150 |
| O  | 35.57840080 | 34.15663295 | 65.76214729 |
| O  | 35.62945350 | 36.97768247 | 65.77105758 |
| O  | 31.41071481 | 32.85227976 | 65.86085880 |
| Zn | 32.72954246 | 31.58100601 | 65.45852456 |
| Zn | 36.90527693 | 35.56064205 | 65.46477093 |
| Zn | 34.29719038 | 35.59243193 | 65.46088954 |
| O  | 39.62468391 | 38.21438153 | 65.76448579 |
| Zn | 38.34630074 | 39.63809437 | 65.46284511 |
| O  | 43.66550558 | 42.27225085 | 65.77118283 |
| O  | 43.71679782 | 45.09335730 | 65.76222454 |
| O  | 39.67058102 | 41.03599442 | 65.76442625 |
| Zn | 40.94901669 | 39.61227999 | 65.46290757 |
| Zn | 44.99790339 | 43.65739075 | 65.46103993 |

|    |             |             |             |
|----|-------------|-------------|-------------|
| Zn | 42.38987309 | 43.68949544 | 65.46474955 |
| O  | 47.88499575 | 46.39782284 | 65.86064020 |
| Zn | 46.56597200 | 47.66913444 | 65.45860518 |
| O  | 50.63762536 | 49.18624507 | 65.96035893 |
| O  | 47.71745530 | 49.31083051 | 65.63114030 |
| Zn | 49.31011181 | 47.73896782 | 65.72022961 |
| Zn | 49.38581491 | 50.48490197 | 65.49088436 |

**WZ-96**

|    |             |             |             |
|----|-------------|-------------|-------------|
| O  | 9.98075297  | 18.81677931 | 27.43611763 |
| Zn | 11.23051784 | 18.19362012 | 28.59078862 |
| O  | 11.31841682 | 17.74059450 | 30.41520807 |
| O  | 12.99703485 | 18.71727988 | 28.06565298 |
| Zn | 14.76354935 | 18.19355390 | 28.59078493 |
| O  | 14.67567821 | 17.74057775 | 30.41521708 |
| O  | 16.01330697 | 18.81673924 | 27.43617683 |
| O  | 8.28993302  | 21.74532774 | 27.43636102 |
| Zn | 9.72750440  | 20.62285191 | 27.68611898 |
| O  | 9.66917438  | 20.59031787 | 30.42601668 |
| O  | 11.38818433 | 21.58171688 | 27.95151600 |
| Zn | 12.99704775 | 20.62709132 | 28.35396125 |
| O  | 12.99704402 | 20.56480888 | 30.51909755 |
| O  | 14.60591309 | 21.58170560 | 27.95152930 |
| Zn | 16.26660326 | 20.62284117 | 27.68618777 |
| O  | 16.32494116 | 20.59029326 | 30.42604227 |
| O  | 17.70415833 | 21.74528469 | 27.43640636 |
| Zn | 8.37453056  | 23.13960298 | 28.59031866 |
| O  | 8.02558970  | 23.44313432 | 30.41438198 |
| O  | 9.71159320  | 24.40689626 | 28.06392123 |
| Zn | 11.36575657 | 23.45248143 | 28.35328198 |
| O  | 11.31071644 | 23.48474336 | 30.51847492 |
| O  | 12.99704102 | 24.36873341 | 27.95201922 |
| Zn | 14.62832314 | 23.45246917 | 28.35329022 |
| O  | 14.68332417 | 23.48471059 | 30.51848366 |
| O  | 16.28247225 | 24.40689682 | 28.06394904 |
| Zn | 17.61948045 | 23.13957951 | 28.59038813 |
| O  | 17.96843926 | 23.44311242 | 30.41444161 |
| Zn | 10.14016092 | 26.19857616 | 28.58926998 |
| O  | 9.70393324  | 26.35007819 | 30.41369288 |
| O  | 11.30623291 | 26.97034235 | 27.43706404 |
| Zn | 12.99704865 | 26.28696366 | 27.68932682 |
| O  | 12.99704241 | 26.35336337 | 30.42298063 |
| O  | 14.68779415 | 26.97039396 | 27.43705077 |
| Zn | 15.85382082 | 26.19851478 | 28.58933434 |
| O  | 16.29011728 | 26.35002112 | 30.41374133 |
| Zn | 10.01529775 | 18.88177048 | 31.21358667 |



|    |             |             |             |
|----|-------------|-------------|-------------|
| O  | 9.70515655  | 18.69503338 | 33.08048103 |
| Zn | 11.29887207 | 18.08678196 | 33.88361832 |
| O  | 11.34166022 | 17.75230065 | 35.75026091 |
| Zn | 12.99704780 | 18.57713345 | 31.02568281 |
| O  | 12.99707082 | 18.65583415 | 33.08559242 |
| Zn | 14.69525597 | 18.08676709 | 33.88363484 |
| O  | 14.65249115 | 17.75229402 | 35.75027884 |
| Zn | 15.97880705 | 18.88173550 | 31.21361027 |
| O  | 16.28898134 | 18.69500927 | 33.08050615 |
| Zn | 8.36255235  | 21.74444094 | 31.21360801 |
| O  | 8.04565098  | 21.56957677 | 33.08048230 |
| Zn | 9.58704678  | 20.54318508 | 33.71836406 |
| O  | 9.67167083  | 20.59245496 | 35.77375071 |
| Zn | 11.35757701 | 21.56511446 | 30.99510384 |
| O  | 11.31205244 | 21.53872827 | 33.12072614 |
| Zn | 12.99706579 | 20.64794278 | 33.67317436 |
| O  | 12.99707706 | 20.58279506 | 35.76859736 |
| Zn | 14.63652501 | 21.56508989 | 30.99512354 |
| O  | 14.68209031 | 21.53870551 | 33.12073879 |
| Zn | 16.40708488 | 20.54315891 | 33.71840293 |
| O  | 16.32249120 | 20.59243636 | 35.77378687 |
| Zn | 17.63155291 | 21.74439709 | 31.21365640 |
| O  | 17.94848928 | 21.56954855 | 33.08051493 |
| Zn | 8.31567587  | 23.25398457 | 33.88357805 |
| O  | 8.04709827  | 23.45846746 | 35.75009079 |
| Zn | 9.58926761  | 24.47857250 | 31.02525204 |
| O  | 9.65780021  | 24.43948748 | 33.08498537 |
| Zn | 11.38289164 | 23.44341782 | 33.67304490 |
| O  | 11.32592744 | 23.47710022 | 35.76836724 |
| Zn | 12.99703376 | 24.40374366 | 30.99386839 |
| O  | 12.99705516 | 24.45680308 | 33.11985002 |
| Zn | 14.61120555 | 23.44339378 | 33.67306208 |
| O  | 14.66819804 | 23.47708204 | 35.76838305 |
| Zn | 16.40475992 | 24.47853401 | 31.02528432 |
| O  | 16.33629682 | 24.43945465 | 33.08500708 |
| Zn | 17.67843564 | 23.25396445 | 33.88359354 |
| O  | 17.94702983 | 23.45845084 | 35.75010351 |
| Zn | 10.01434641 | 26.19515227 | 33.88222680 |
| O  | 9.70293875  | 26.32565941 | 35.74875287 |
| Zn | 11.34434769 | 26.90788234 | 31.21114053 |
| O  | 11.33786613 | 27.27031462 | 33.07793108 |
| Zn | 12.99705313 | 26.44858399 | 33.71689225 |
| O  | 12.99706586 | 26.35180549 | 35.77240759 |
| Zn | 14.64970948 | 26.90788118 | 31.21115477 |
| O  | 14.65624880 | 27.27030790 | 33.07793178 |
| Zn | 15.97975949 | 26.19512610 | 33.88222303 |
| O  | 16.29118673 | 26.32563668 | 35.74874770 |

|    |             |             |             |
|----|-------------|-------------|-------------|
| Zn | 10.01875545 | 18.82679061 | 36.56088045 |
| O  | 9.71084406  | 18.69562097 | 38.42971805 |
| Zn | 11.31740180 | 18.07890178 | 39.21042221 |
| O  | 11.36618421 | 17.69719112 | 41.06511130 |
| Zn | 12.99707252 | 18.57664489 | 36.36547815 |
| O  | 12.99708075 | 18.68121305 | 38.40996382 |
| Zn | 14.67674772 | 18.07889827 | 39.21044021 |
| O  | 14.62795751 | 17.69718526 | 41.06512539 |
| Zn | 15.97539676 | 18.82677203 | 36.56091355 |
| O  | 16.28332181 | 18.69560454 | 38.42974723 |
| Zn | 8.31622864  | 21.77577574 | 36.56128194 |
| O  | 8.04848644  | 21.57562873 | 38.43010383 |
| Zn | 9.56057712  | 20.52862920 | 39.05890522 |
| O  | 9.62660951  | 20.56696298 | 41.12090626 |
| Zn | 11.38251958 | 21.58034253 | 36.37355281 |
| O  | 11.32267873 | 21.54559258 | 38.46708808 |
| Zn | 12.99708124 | 20.62874830 | 39.05498930 |
| O  | 12.99707873 | 20.52299238 | 41.14486217 |
| Zn | 14.61163759 | 21.58032454 | 36.37357496 |
| O  | 14.67148909 | 21.54557858 | 38.46710066 |
| Zn | 16.43359966 | 20.52861374 | 39.05893537 |
| O  | 16.36755311 | 20.56695313 | 41.12092293 |
| Zn | 17.67793138 | 21.77576594 | 36.56131844 |
| O  | 17.94568371 | 21.57562730 | 38.43013828 |
| Zn | 8.31788381  | 23.27494129 | 39.21165907 |
| O  | 8.01203202  | 23.50771756 | 41.06642193 |
| Zn | 9.58828691  | 24.48041915 | 36.36536886 |
| O  | 9.67904181  | 24.42824591 | 38.41010719 |
| Zn | 11.36564665 | 23.45417085 | 39.05459338 |
| O  | 11.27388765 | 23.50717718 | 41.14452617 |
| Zn | 12.99706390 | 24.37660837 | 36.37313438 |
| O  | 12.99707183 | 24.44579183 | 38.46695767 |
| Zn | 14.62850246 | 23.45416258 | 39.05459641 |
| O  | 14.72026307 | 23.50717587 | 41.14452231 |
| Zn | 16.40584499 | 24.48040654 | 36.36538333 |
| O  | 16.31511033 | 24.42823787 | 38.41011826 |
| Zn | 17.67626715 | 23.27494215 | 39.21169315 |
| O  | 17.98210696 | 23.50772005 | 41.06645680 |
| Zn | 9.99812742  | 26.18368895 | 39.21162339 |
| O  | 9.64319909  | 26.33207297 | 41.06625124 |
| Zn | 11.29456257 | 26.93386488 | 36.56029668 |
| O  | 11.33447139 | 27.26640559 | 38.42895504 |
| Zn | 12.99707504 | 26.48088456 | 39.05886375 |
| O  | 12.99706701 | 26.40429186 | 41.12058565 |
| Zn | 14.69957192 | 26.93386041 | 36.56029390 |
| O  | 14.65967935 | 27.26639810 | 38.42895502 |
| Zn | 15.99601885 | 26.18368454 | 39.21163291 |

|    |             |             |             |
|----|-------------|-------------|-------------|
| O  | 16.35092743 | 26.33207035 | 41.06626830 |
| Zn | 10.04629190 | 18.77412297 | 41.85506378 |
| O  | 9.70961920  | 18.56875489 | 43.70947185 |
| Zn | 11.17777627 | 18.22316453 | 44.84634641 |
| O  | 11.21468491 | 18.10798849 | 46.78533759 |
| Zn | 12.99706991 | 18.38133215 | 41.84348315 |
| O  | 12.99705452 | 18.54119375 | 43.92602683 |
| Zn | 14.81632474 | 18.22314370 | 44.84636863 |
| O  | 14.77941343 | 18.10798347 | 46.78535494 |
| Zn | 15.94784618 | 18.77412209 | 41.85509090 |
| O  | 16.28446424 | 18.56881820 | 43.70950887 |
| Zn | 8.28434391  | 21.82652885 | 41.85720009 |
| O  | 7.93839925  | 21.63655040 | 43.71149895 |
| Zn | 9.25813153  | 20.35297375 | 44.21344536 |
| O  | 9.70002832  | 20.60614967 | 46.08810516 |
| Zn | 11.35531329 | 21.56485178 | 41.61855999 |
| O  | 11.30514874 | 21.53559964 | 43.69171435 |
| Zn | 12.99709635 | 20.55095591 | 44.01131191 |
| O  | 12.99702673 | 20.58409107 | 46.21680029 |
| Zn | 14.63884318 | 21.56485018 | 41.61853643 |
| O  | 14.68904034 | 21.53558923 | 43.69168587 |
| Zn | 16.73575370 | 20.35311803 | 44.21345537 |
| O  | 16.29398138 | 20.60620431 | 46.08817179 |
| Zn | 17.70980364 | 21.82652903 | 41.85724290 |
| O  | 18.05566759 | 21.63655626 | 43.71155292 |
| Zn | 8.37474563  | 23.07944583 | 44.84969131 |
| O  | 8.29598958  | 23.16690036 | 46.78904016 |
| Zn | 9.42015101  | 24.57780297 | 41.84517732 |
| O  | 9.55818615  | 24.49668791 | 43.92836594 |
| Zn | 11.29937364 | 23.49309363 | 44.01283489 |
| O  | 11.32831525 | 23.47344778 | 46.21822178 |
| Zn | 12.99707504 | 24.40805755 | 41.61707026 |
| O  | 12.99708189 | 24.46681357 | 43.69009006 |
| Zn | 14.69477251 | 23.49307143 | 44.01288079 |
| O  | 14.66577998 | 23.47347711 | 46.21825816 |
| Zn | 16.57397866 | 24.57780258 | 41.84520489 |
| O  | 16.43593864 | 24.49670337 | 43.92839692 |
| Zn | 17.61938926 | 23.07947818 | 44.84972631 |
| O  | 17.69812405 | 23.16691685 | 46.78907599 |
| Zn | 10.19236703 | 26.23072401 | 44.84952047 |
| O  | 10.07673562 | 26.25630214 | 46.78869683 |
| Zn | 11.23525226 | 26.93634127 | 41.85782061 |
| O  | 11.22691977 | 27.32786623 | 43.71252329 |
| Zn | 12.99706035 | 26.81842061 | 44.21426605 |
| O  | 12.99704623 | 26.31488539 | 46.09085712 |
| Zn | 14.75887880 | 26.93635034 | 41.85783206 |
| O  | 14.76719944 | 27.32788161 | 43.71253687 |

|    |             |             |             |
|----|-------------|-------------|-------------|
| Zn | 15.80174654 | 26.23073501 | 44.84953398 |
| O  | 15.91736764 | 26.25631440 | 46.78871420 |
| Zn | 9.87331220  | 19.26807052 | 47.61364935 |
| Zn | 12.99705083 | 18.68188004 | 46.95403125 |
| Zn | 16.12082757 | 19.26804516 | 47.61364287 |
| Zn | 8.63090941  | 21.42431537 | 47.61623647 |
| Zn | 11.34923636 | 21.55902201 | 46.13551795 |
| Zn | 14.64478228 | 21.55906176 | 46.13571995 |
| Zn | 17.36323788 | 21.42430314 | 47.61623411 |
| Zn | 9.68196417  | 24.42601279 | 46.95717952 |
| Zn | 12.99703962 | 24.41087599 | 46.14268573 |
| Zn | 16.31215059 | 24.42602727 | 46.95720544 |
| Zn | 11.75289272 | 26.84154155 | 47.61428713 |
| Zn | 14.24120370 | 26.84154333 | 47.61429020 |

**WZ-205**

|    |             |             |             |
|----|-------------|-------------|-------------|
| O  | 16.24605348 | 20.28819693 | 72.14040918 |
| O  | 11.31748188 | 25.06534517 | 71.67616165 |
| O  | 14.53300021 | 23.17595802 | 72.10641560 |
| O  | 17.95926378 | 23.17574039 | 72.10619831 |
| O  | 21.17452102 | 25.06527792 | 71.67571713 |
| O  | 13.70713414 | 26.29888164 | 71.86930114 |
| O  | 18.78451398 | 26.29854232 | 71.86868793 |
| O  | 11.42575260 | 28.77104155 | 71.89420484 |
| O  | 14.72841883 | 29.41286283 | 72.24243246 |
| O  | 17.76370440 | 29.41277920 | 72.24236755 |
| O  | 21.06607842 | 28.77069510 | 71.89345240 |
| O  | 10.30153169 | 31.77956305 | 71.63803056 |
| O  | 16.24615800 | 32.45780456 | 72.26832910 |
| O  | 22.18494492 | 31.77924063 | 71.63731990 |
| O  | 14.48349808 | 35.31979753 | 73.56553272 |
| O  | 18.00953782 | 35.31941692 | 73.56519919 |
| Zn | 14.86344846 | 21.37053170 | 72.75851317 |
| O  | 14.56493732 | 21.41790714 | 74.67948153 |
| Zn | 16.24637402 | 20.83445756 | 75.39895297 |
| O  | 16.24641122 | 20.50872596 | 77.28967082 |
| Zn | 17.62889081 | 21.37033531 | 72.75846347 |
| O  | 17.92779825 | 21.41780709 | 74.67935880 |
| Zn | 10.33394388 | 24.69405555 | 73.10306817 |
| O  | 9.67851779  | 24.28514782 | 74.72735637 |
| Zn | 11.38603680 | 23.63016515 | 75.52794454 |
| O  | 11.32863005 | 23.30856634 | 77.37186902 |
| Zn | 13.19381813 | 24.49006171 | 72.36416547 |
| O  | 12.91795028 | 24.30978815 | 74.55044739 |
| Zn | 14.54237519 | 23.30388075 | 75.18030264 |
| O  | 14.59314728 | 23.34672241 | 77.26213672 |

|    |             |             |             |
|----|-------------|-------------|-------------|
| Zn | 16.24620524 | 23.82936538 | 72.61318479 |
| O  | 16.24637806 | 24.31377582 | 74.59677423 |
| Zn | 17.95035867 | 23.30378470 | 75.18016096 |
| O  | 17.89968795 | 23.34674600 | 77.26200205 |
| Zn | 19.29848298 | 24.48984425 | 72.36385418 |
| O  | 19.57471441 | 24.30987886 | 74.55015690 |
| Zn | 21.10684622 | 23.63042986 | 75.52753938 |
| O  | 21.16429171 | 23.30871018 | 77.37145592 |
| Zn | 22.15806433 | 24.69480354 | 73.10275704 |
| O  | 22.81410171 | 24.28578658 | 74.72676834 |
| Zn | 9.92099377  | 26.05345617 | 75.60720999 |
| O  | 9.62103817  | 26.14911082 | 77.45375652 |
| Zn | 11.84989598 | 26.94617205 | 71.84035306 |
| O  | 11.27016183 | 27.02823182 | 74.65486042 |
| Zn | 12.99699751 | 26.22831621 | 75.23485161 |
| O  | 12.95058667 | 26.16770052 | 77.30801552 |
| Zn | 14.69390339 | 27.58578858 | 72.73524782 |
| O  | 14.64455877 | 27.22933038 | 74.72271445 |
| Zn | 16.24648102 | 26.17309025 | 75.28869653 |
| O  | 16.24651224 | 26.18908034 | 77.32180277 |
| Zn | 17.79847826 | 27.58571050 | 72.73498786 |
| O  | 17.84831033 | 27.22937416 | 74.72253440 |
| Zn | 19.49589124 | 26.22840089 | 75.23477077 |
| O  | 19.54246386 | 26.16769362 | 77.30795184 |
| Zn | 20.64168155 | 26.94603429 | 71.83890991 |
| O  | 21.22266220 | 27.02838272 | 74.65503875 |
| Zn | 22.57214011 | 26.05376435 | 75.60717075 |
| O  | 22.87209925 | 26.14929263 | 77.45373154 |
| Zn | 10.14773371 | 30.09368146 | 72.49395525 |
| O  | 9.72447497  | 29.96130183 | 74.39634749 |
| Zn | 11.19837557 | 28.91370695 | 75.19145764 |
| O  | 11.25481041 | 28.97783619 | 77.27502180 |
| Zn | 12.91888373 | 29.64650266 | 72.70440812 |
| O  | 12.87487019 | 29.99239649 | 74.67914323 |
| Zn | 14.60248433 | 29.16220502 | 75.33286158 |
| O  | 14.59127434 | 29.03585311 | 77.36346189 |
| Zn | 16.24610320 | 30.52953161 | 72.73280216 |
| O  | 16.24630689 | 30.11266951 | 74.81023399 |
| Zn | 17.89032089 | 29.16225129 | 75.33257193 |
| O  | 17.90174464 | 29.03578704 | 77.36322782 |
| Zn | 19.57330662 | 29.64696110 | 72.70371792 |
| O  | 19.61780685 | 29.99258525 | 74.67862082 |
| Zn | 21.29425411 | 28.91394441 | 75.19112400 |
| O  | 21.23816936 | 28.97799135 | 77.27474342 |
| Zn | 22.34338024 | 30.09380025 | 72.49360898 |
| O  | 22.76818539 | 29.96161847 | 74.39545720 |
| Zn | 9.90540476  | 31.51381527 | 75.46421965 |

|    |             |             |             |
|----|-------------|-------------|-------------|
| O  | 9.61409753  | 31.75273330 | 77.30952850 |
| Zn | 10.81150921 | 32.64257618 | 73.09123235 |
| O  | 11.21456591 | 32.89218360 | 74.83832892 |
| Zn | 12.88983457 | 31.91590208 | 75.33233551 |
| O  | 12.88897016 | 31.83051077 | 77.35755016 |
| Zn | 14.90066228 | 33.52499740 | 73.08183142 |
| O  | 14.55542645 | 32.83955869 | 74.91867227 |
| Zn | 16.24639446 | 31.95691886 | 75.51254757 |
| O  | 16.24655307 | 31.89854332 | 77.50746346 |
| Zn | 17.59206228 | 33.52471879 | 73.08162954 |
| O  | 17.93734461 | 32.83930222 | 74.91844808 |
| Zn | 19.60295262 | 31.91582618 | 75.33262170 |
| O  | 19.60399023 | 31.83048254 | 77.35774727 |
| Zn | 21.67851758 | 32.64285005 | 73.09135280 |
| O  | 21.27818173 | 32.89251401 | 74.83901209 |
| Zn | 22.58757662 | 31.51391658 | 75.46371679 |
| O  | 22.87897172 | 31.75265128 | 77.30904938 |
| Zn | 14.51361294 | 34.86966635 | 75.55468251 |
| O  | 14.40488728 | 34.71546735 | 77.45225707 |
| Zn | 16.24658412 | 36.04348733 | 73.81629521 |
| O  | 16.24670013 | 36.01433967 | 75.78278590 |
| Zn | 17.97947804 | 34.86940406 | 75.55447233 |
| O  | 18.08838809 | 34.71537433 | 77.45201730 |
| Zn | 14.84112057 | 21.55837169 | 78.06266278 |
| O  | 14.58747593 | 21.45483281 | 79.94720495 |
| Zn | 16.24647861 | 20.85086138 | 80.70727125 |
| O  | 16.24656254 | 20.53449198 | 82.59402428 |
| Zn | 17.65184339 | 21.55835782 | 78.06254899 |
| O  | 17.90538951 | 21.45491859 | 79.94714166 |
| Zn | 9.96770778  | 24.39913272 | 78.17178625 |
| O  | 9.67855325  | 24.24114974 | 80.04140903 |
| Zn | 11.30026482 | 23.57380846 | 80.82684544 |
| O  | 11.32411665 | 23.31294258 | 82.70259294 |
| Zn | 12.97002160 | 24.25115978 | 77.96914880 |
| O  | 12.94672190 | 24.27652497 | 80.00279861 |
| Zn | 14.58031056 | 23.30144643 | 80.60624679 |
| O  | 14.59651530 | 23.34687120 | 82.64908001 |
| Zn | 16.24646141 | 24.30566199 | 77.92255721 |
| O  | 16.24645275 | 24.27969683 | 79.97046782 |
| Zn | 17.91266931 | 23.30157430 | 80.60614066 |
| O  | 17.89652649 | 23.34699396 | 82.64901127 |
| Zn | 19.52291619 | 24.25115426 | 77.96899073 |
| O  | 19.54631864 | 24.27645839 | 80.00262418 |
| Zn | 21.19290588 | 23.57390716 | 80.82665658 |
| O  | 21.16911778 | 23.31288918 | 82.70234068 |
| Zn | 22.52512289 | 24.39922619 | 78.17146272 |
| O  | 22.81449379 | 24.24120215 | 80.04101398 |

|    |             |             |             |
|----|-------------|-------------|-------------|
| Zn | 9.87552793  | 25.99877140 | 80.80092593 |
| O  | 9.65436627  | 26.18582412 | 82.67464077 |
| Zn | 11.28105838 | 27.11056131 | 77.97435136 |
| O  | 11.30028258 | 27.10387244 | 80.00707408 |
| Zn | 12.98660706 | 26.19591349 | 80.64425647 |
| O  | 12.93436922 | 26.18648053 | 82.67691538 |
| Zn | 14.58490922 | 27.12356525 | 77.93206652 |
| O  | 14.59860029 | 27.12380681 | 79.98081349 |
| Zn | 16.24653466 | 26.17292827 | 80.59179825 |
| O  | 16.24648776 | 26.20157998 | 82.64109609 |
| Zn | 17.90813259 | 27.12358371 | 77.93197477 |
| O  | 17.89450002 | 27.12363503 | 79.98073318 |
| Zn | 19.50653376 | 26.19583375 | 80.64411800 |
| O  | 19.55882326 | 26.18627450 | 82.67683053 |
| Zn | 21.21198445 | 27.11067497 | 77.97416292 |
| O  | 21.19281808 | 27.10394047 | 80.00692591 |
| Zn | 22.61768100 | 25.99883030 | 80.80064603 |
| O  | 22.83883556 | 26.18566749 | 82.67440687 |
| Zn | 9.85616908  | 30.03973413 | 78.15468221 |
| O  | 9.61587115  | 29.90309671 | 80.02158429 |
| Zn | 11.24714871 | 28.99685829 | 80.64423768 |
| O  | 11.27989904 | 29.03461190 | 82.67370953 |
| Zn | 12.92973224 | 29.92470054 | 77.96236823 |
| O  | 12.91039231 | 29.95143236 | 79.99844437 |
| Zn | 14.57172089 | 29.03453092 | 80.59817646 |
| O  | 14.59274731 | 29.03081921 | 82.64139483 |
| Zn | 16.24657517 | 29.98598904 | 77.99146430 |
| O  | 16.24664143 | 29.94285255 | 80.02328899 |
| Zn | 17.92141675 | 29.03431006 | 80.59823459 |
| O  | 17.90043056 | 29.03052756 | 82.64146821 |
| Zn | 19.56322716 | 29.92465783 | 77.96231797 |
| O  | 19.58262512 | 29.95135704 | 79.99841690 |
| Zn | 21.24601655 | 28.99692158 | 80.64412815 |
| O  | 21.21330842 | 29.03438258 | 82.67359634 |
| Zn | 22.63689127 | 30.03981895 | 78.15443411 |
| O  | 22.87724663 | 29.90316335 | 80.02130456 |
| Zn | 9.91449355  | 31.66458264 | 80.73872932 |
| O  | 9.64085207  | 31.87559746 | 82.61229468 |
| Zn | 11.20989784 | 32.51839722 | 78.09342551 |
| O  | 11.25025679 | 32.79938386 | 79.96733129 |
| Zn | 12.90334805 | 31.91996485 | 80.57688563 |
| O  | 12.92885215 | 31.88858684 | 82.61746658 |
| Zn | 14.52299073 | 32.87194997 | 77.96284425 |
| O  | 14.57262736 | 32.79874448 | 80.00318066 |
| Zn | 16.24664075 | 31.85622469 | 80.57975107 |
| O  | 16.24666839 | 31.89485953 | 82.62591616 |
| Zn | 17.96998624 | 32.87202071 | 77.96301890 |

|    |             |             |             |
|----|-------------|-------------|-------------|
| O  | 17.92058492 | 32.79900948 | 80.00338826 |
| Zn | 19.58988210 | 31.91998689 | 80.57670092 |
| O  | 19.56447502 | 31.88834577 | 82.61735330 |
| Zn | 21.28330099 | 32.51829961 | 78.09313285 |
| O  | 21.24297980 | 32.79928357 | 79.96705335 |
| Zn | 22.57878892 | 31.66460317 | 80.73870493 |
| O  | 22.85258105 | 31.87526319 | 82.61220698 |
| Zn | 14.85916844 | 34.68124131 | 80.57053824 |
| O  | 14.59808176 | 34.75376326 | 82.47204757 |
| Zn | 16.24670948 | 35.50240577 | 77.75790722 |
| O  | 16.24660986 | 35.66924418 | 79.71797611 |
| Zn | 17.63375200 | 34.68134653 | 80.57092538 |
| O  | 17.89485909 | 34.75379659 | 82.47239445 |
| Zn | 14.84708970 | 21.54990899 | 83.42546045 |
| O  | 14.58542980 | 21.46127446 | 85.30315845 |
| Zn | 16.24647131 | 20.86643635 | 86.06159302 |
| O  | 16.24649079 | 20.55709595 | 87.94560967 |
| Zn | 17.64590753 | 21.55008485 | 83.42551575 |
| O  | 17.90758417 | 21.46140094 | 85.30315656 |
| Zn | 9.96597687  | 24.45485261 | 83.44644377 |
| O  | 9.66900772  | 24.31232599 | 85.32557228 |
| Zn | 11.25977506 | 23.61578860 | 86.14034069 |
| O  | 11.28858437 | 23.34402953 | 88.01920098 |
| Zn | 12.94005432 | 24.25223033 | 83.30137118 |
| O  | 12.92921436 | 24.30557127 | 85.34160424 |
| Zn | 14.55736609 | 23.32371035 | 85.92999293 |
| O  | 14.56665963 | 23.37447534 | 87.97403868 |
| Zn | 16.24650038 | 24.32886056 | 83.27876612 |
| O  | 16.24650293 | 24.28756108 | 85.31766101 |
| Zn | 17.93569798 | 23.32387773 | 85.93007605 |
| O  | 17.92619456 | 23.37445547 | 87.97417006 |
| Zn | 19.55319073 | 24.25201877 | 83.30123098 |
| O  | 19.56392798 | 24.30529089 | 85.34151026 |
| Zn | 21.23335827 | 23.61547003 | 86.14018958 |
| O  | 21.20425420 | 23.34386051 | 88.01914710 |
| Zn | 22.52732273 | 24.45470947 | 83.44633907 |
| O  | 22.82422149 | 24.31183875 | 85.32543930 |
| Zn | 9.84854139  | 26.03904403 | 86.14156856 |
| O  | 9.62640580  | 26.21391367 | 88.02173346 |
| Zn | 11.24504202 | 27.14727720 | 83.30598008 |
| O  | 11.26740581 | 27.16310018 | 85.34957502 |
| Zn | 12.95303797 | 26.23233333 | 85.95959881 |
| O  | 12.88312197 | 26.22864854 | 88.00373517 |
| Zn | 14.58346432 | 27.13481646 | 83.25964788 |
| O  | 14.58740498 | 27.14096024 | 85.30131191 |
| Zn | 16.24648962 | 26.19488862 | 85.88958216 |
| O  | 16.24647029 | 26.22606255 | 87.92513977 |



|    |             |             |             |
|----|-------------|-------------|-------------|
| Zn | 17.90966552 | 27.13451393 | 83.25968737 |
| O  | 17.90565755 | 27.14074277 | 85.30132160 |
| Zn | 19.54001290 | 26.23208289 | 85.95961039 |
| O  | 19.60977247 | 26.22858786 | 88.00385920 |
| Zn | 21.24812051 | 27.14710907 | 83.30583056 |
| O  | 21.22588426 | 27.16259930 | 85.34949922 |
| Zn | 22.64467209 | 26.03845631 | 86.14173992 |
| O  | 22.86654642 | 26.21333225 | 88.02195032 |
| Zn | 9.85024208  | 30.15881241 | 83.43873525 |
| O  | 9.63105858  | 30.03092569 | 85.31707713 |
| Zn | 11.22306883 | 29.07507074 | 85.93904616 |
| O  | 11.22387394 | 29.13138274 | 87.98874655 |
| Zn | 12.96970274 | 29.98220520 | 83.26115934 |
| O  | 12.92381050 | 29.99979460 | 85.29610568 |
| Zn | 14.57638937 | 29.06297392 | 85.87192207 |
| O  | 14.57770728 | 29.04489909 | 87.91227589 |
| Zn | 16.24660586 | 30.00892319 | 83.21437054 |
| O  | 16.24664375 | 29.97748080 | 85.26303153 |
| Zn | 17.91681013 | 29.06282231 | 85.87188065 |
| O  | 17.91545572 | 29.04480588 | 87.91214701 |
| Zn | 19.52348452 | 29.98195684 | 83.26107770 |
| O  | 19.56959333 | 29.99944436 | 85.29600685 |
| Zn | 21.27020209 | 29.07467056 | 85.93909671 |
| O  | 21.26947255 | 29.13106616 | 87.98893049 |
| Zn | 22.64318903 | 30.15845487 | 83.43871341 |
| O  | 22.86230510 | 30.03033713 | 85.31699083 |
| Zn | 9.96214332  | 31.78740050 | 86.02379875 |
| O  | 9.71189262  | 32.05193029 | 87.89450331 |
| Zn | 11.25383796 | 32.59521991 | 83.37054599 |
| O  | 11.32179478 | 32.89711172 | 85.24132167 |
| Zn | 12.94236665 | 31.96444965 | 85.83789768 |
| O  | 12.95997474 | 31.91817386 | 87.87681514 |
| Zn | 14.56418317 | 32.91729082 | 83.14577373 |
| O  | 14.59734896 | 32.87525841 | 85.20913362 |
| Zn | 16.24666481 | 31.88342720 | 85.81363608 |
| O  | 16.24665601 | 31.88946647 | 87.86483204 |
| Zn | 17.92913739 | 32.91732174 | 83.14569515 |
| O  | 17.89607572 | 32.87513879 | 85.20907029 |
| Zn | 19.55098305 | 31.96418181 | 85.83795646 |
| O  | 19.53308878 | 31.91790134 | 87.87668252 |
| Zn | 21.23946735 | 32.59461152 | 83.37056019 |
| O  | 21.17173556 | 32.89640770 | 85.24135070 |
| Zn | 22.53120336 | 31.78669593 | 86.02404671 |
| O  | 22.78129640 | 32.05132503 | 87.89474218 |
| Zn | 14.85540103 | 34.66906033 | 85.99294707 |
| O  | 14.60583410 | 34.76095012 | 87.87815210 |
| Zn | 16.24632831 | 35.34762888 | 83.25683358 |

|    |             |             |             |
|----|-------------|-------------|-------------|
| O  | 16.24658558 | 35.67899186 | 85.14516633 |
| Zn | 17.63768649 | 34.66869519 | 85.99263326 |
| O  | 17.88751620 | 34.76071889 | 87.87792324 |
| Zn | 14.82742689 | 21.57423647 | 88.73946898 |
| O  | 14.56829320 | 21.48310149 | 90.62131059 |
| Zn | 16.24624527 | 20.88739284 | 91.33517518 |
| O  | 16.24628397 | 20.58234888 | 93.23409432 |
| Zn | 17.66542296 | 21.57415173 | 88.73954946 |
| O  | 17.92429395 | 21.48312342 | 90.62145858 |
| Zn | 9.97029827  | 24.49317264 | 88.80238771 |
| O  | 9.68121170  | 24.36830466 | 90.70343163 |
| Zn | 11.18383766 | 23.56624678 | 91.54107681 |
| O  | 11.61740451 | 22.98840698 | 93.28538364 |
| Zn | 12.90403281 | 24.28161616 | 88.62572975 |
| O  | 12.86180770 | 24.32945241 | 90.67879158 |
| Zn | 14.55204535 | 23.37351805 | 91.16982824 |
| O  | 14.62323028 | 23.41149143 | 93.21540300 |
| Zn | 16.24632010 | 24.34839028 | 88.53990097 |
| O  | 16.24613174 | 24.29723470 | 90.56080219 |
| Zn | 17.94033532 | 23.37359890 | 91.16973653 |
| O  | 17.86882605 | 23.41151487 | 93.21511645 |
| Zn | 19.58892426 | 24.28148802 | 88.62573528 |
| O  | 19.63085545 | 24.32920943 | 90.67866999 |
| Zn | 21.30829120 | 23.56560968 | 91.54134679 |
| O  | 20.87397330 | 22.98736784 | 93.28539744 |
| Zn | 22.52239006 | 24.49280635 | 88.80279385 |
| O  | 22.81116713 | 24.36783205 | 90.70393148 |
| Zn | 9.78926561  | 26.12602614 | 91.42906642 |
| O  | 9.37198522  | 26.66470805 | 93.21223873 |
| Zn | 11.19335961 | 27.24096999 | 88.60382511 |
| O  | 11.18761375 | 27.29123612 | 90.65978539 |
| Zn | 12.87584366 | 26.29568313 | 91.15373715 |
| O  | 12.73965506 | 26.30295585 | 93.19976683 |
| Zn | 14.57296243 | 27.14402133 | 88.52440769 |
| O  | 14.57661627 | 27.11045209 | 90.56123431 |
| Zn | 16.24605837 | 26.18453466 | 91.17268528 |
| O  | 16.24603980 | 26.17439353 | 93.20469186 |
| Zn | 17.91984517 | 27.14405368 | 88.52439988 |
| O  | 17.91588290 | 27.11030464 | 90.56144386 |
| Zn | 19.61662477 | 26.29533877 | 91.15378082 |
| O  | 19.75238477 | 26.30275393 | 93.19991065 |
| Zn | 21.29965464 | 27.24067441 | 88.60405226 |
| O  | 21.30496262 | 27.29081874 | 90.66017621 |
| Zn | 22.70324871 | 26.12541955 | 91.42932007 |
| O  | 23.12015224 | 26.66412068 | 93.21255291 |
| Zn | 9.89323867  | 30.36584061 | 88.78486372 |
| O  | 9.71002585  | 30.37411777 | 90.67905369 |

|    |             |             |             |
|----|-------------|-------------|-------------|
| Zn | 11.17471990 | 29.21756622 | 91.25658861 |
| O  | 11.20422232 | 29.35035260 | 93.29845121 |
| Zn | 12.96223778 | 30.01505425 | 88.53175286 |
| O  | 12.93629911 | 30.01162208 | 90.56978437 |
| Zn | 14.56173253 | 29.01954873 | 91.11808567 |
| O  | 14.58053104 | 28.91700952 | 93.16151576 |
| Zn | 16.24668223 | 29.99507496 | 88.46292159 |
| O  | 16.24651789 | 29.90512775 | 90.50703924 |
| Zn | 17.93109640 | 29.01967022 | 91.11832593 |
| O  | 17.91175630 | 28.91733551 | 93.16186038 |
| Zn | 19.53098403 | 30.01485131 | 88.53176874 |
| O  | 19.55659425 | 30.01137848 | 90.56976395 |
| Zn | 21.31778553 | 29.21723255 | 91.25685135 |
| O  | 21.28786217 | 29.35011963 | 93.29887556 |
| Zn | 22.59998534 | 30.36546396 | 88.78550814 |
| O  | 22.78275510 | 30.37356698 | 90.67974547 |
| Zn | 10.10680884 | 32.10774211 | 91.41569912 |
| O  | 10.02813519 | 32.61837263 | 93.26702825 |
| Zn | 11.33324766 | 32.74102977 | 88.65089343 |
| O  | 11.49416694 | 33.09255410 | 90.50225234 |
| Zn | 12.95362570 | 31.94824378 | 91.14516813 |
| O  | 12.92977898 | 31.88106666 | 93.17561840 |
| Zn | 14.58796337 | 32.88702952 | 88.46475280 |
| O  | 14.63611435 | 32.81481786 | 90.51000837 |
| Zn | 16.24640320 | 31.78137615 | 91.07315649 |
| O  | 16.24605707 | 31.68401436 | 93.12759387 |
| Zn | 17.90544857 | 32.88713721 | 88.46483570 |
| O  | 17.85669584 | 32.81488464 | 90.51000097 |
| Zn | 19.53891028 | 31.94813479 | 91.14549005 |
| O  | 19.56241964 | 31.88087464 | 93.17575908 |
| Zn | 21.15972920 | 32.74046478 | 88.65081476 |
| O  | 20.99871020 | 33.09191674 | 90.50228802 |
| Zn | 22.38593252 | 32.10741304 | 91.41619032 |
| O  | 22.46451668 | 32.61812775 | 93.26745606 |
| Zn | 14.82537415 | 34.58230266 | 91.31170184 |
| O  | 14.56902589 | 34.58192671 | 93.21999562 |
| Zn | 16.24678044 | 35.36125385 | 88.67672995 |
| O  | 16.24634861 | 35.65099941 | 90.58019673 |
| Zn | 17.66734059 | 34.58203304 | 91.31215509 |
| O  | 17.92260653 | 34.58182199 | 93.22067528 |
| Zn | 14.71831019 | 21.56203574 | 93.88387937 |
| O  | 14.42970541 | 21.48301605 | 95.83355100 |
| Zn | 16.24640354 | 21.40344083 | 96.13870333 |
| Zn | 17.77436029 | 21.56207951 | 93.88357273 |
| O  | 18.06302950 | 21.48326235 | 95.83334627 |
| Zn | 9.09275459  | 25.41261624 | 94.49663069 |
| O  | 9.22327923  | 24.04719963 | 95.62697519 |

|    |             |             |             |
|----|-------------|-------------|-------------|
| Zn | 10.79632135 | 23.38523420 | 94.95126330 |
| Zn | 12.96520624 | 24.38880424 | 93.63558597 |
| O  | 12.63198374 | 24.26373461 | 95.72787395 |
| Zn | 14.32061050 | 23.46398737 | 96.07628191 |
| Zn | 16.24609372 | 24.36038987 | 93.95985779 |
| O  | 16.24621631 | 23.77273510 | 95.88901848 |
| Zn | 18.17161226 | 23.46431588 | 96.07604256 |
| Zn | 19.52682661 | 24.38845796 | 93.63560786 |
| O  | 19.86034589 | 24.26363381 | 95.72796910 |
| Zn | 21.69552462 | 23.38433872 | 94.95084326 |
| Zn | 23.39981097 | 25.41157364 | 94.49680800 |
| O  | 23.26919859 | 24.04582917 | 95.62634488 |
| Zn | 11.09109515 | 27.44125265 | 93.83781152 |
| O  | 11.08160044 | 27.37595086 | 95.85325403 |
| Zn | 12.55644131 | 26.18755376 | 96.03510465 |
| Zn | 14.54388495 | 27.00963206 | 93.83354595 |
| O  | 14.35769171 | 26.82730379 | 95.81749690 |
| Zn | 17.94799514 | 27.00990063 | 93.83352688 |
| O  | 18.13426965 | 26.82754631 | 95.81746794 |
| Zn | 19.93543563 | 26.18751449 | 96.03509655 |
| Zn | 21.40110921 | 27.44073472 | 93.83823247 |
| O  | 21.41024686 | 27.37599564 | 95.85342851 |
| Zn | 10.33264592 | 30.95670497 | 94.16162204 |
| O  | 10.78267056 | 31.03218378 | 96.03312044 |
| Zn | 11.31090949 | 29.21098491 | 96.17364842 |
| Zn | 13.05302907 | 29.98327086 | 93.79291878 |
| O  | 13.17311481 | 29.89135313 | 95.84757278 |
| Zn | 14.58063701 | 28.65479377 | 96.13684203 |
| Zn | 16.24604527 | 29.78620527 | 93.72373621 |
| O  | 16.24578998 | 29.59571517 | 95.86852754 |
| Zn | 17.91091905 | 28.65484946 | 96.13693344 |
| Zn | 19.43921106 | 29.98328890 | 93.79333126 |
| O  | 19.31854720 | 29.89158184 | 95.84810139 |
| Zn | 21.18084214 | 29.21108414 | 96.17389089 |
| Zn | 22.15938228 | 30.95630168 | 94.16174081 |
| O  | 21.70905587 | 31.03223258 | 96.03329926 |
| Zn | 12.64764401 | 31.90003882 | 96.05543487 |
| Zn | 11.61687500 | 33.39306944 | 93.99522689 |
| O  | 12.50259227 | 33.91496669 | 95.57300833 |
| Zn | 14.62862758 | 32.63549949 | 93.74691874 |
| O  | 14.63033748 | 32.40081947 | 95.84064525 |
| Zn | 16.24618561 | 31.51002811 | 96.15577366 |
| Zn | 17.86360951 | 32.63527228 | 93.74678814 |
| O  | 17.86189450 | 32.40094892 | 95.84125090 |
| Zn | 20.87624643 | 33.39316912 | 93.99609226 |
| O  | 19.98943016 | 33.91566323 | 95.57257925 |
| Zn | 19.84440377 | 31.90035942 | 96.05566605 |

|    |             |             |             |
|----|-------------|-------------|-------------|
| Zn | 14.41212041 | 34.38594503 | 95.77082529 |
| Zn | 16.24558253 | 35.26519438 | 93.86093139 |
| O  | 16.24572280 | 35.16529109 | 95.79066222 |
| Zn | 18.07975961 | 34.38605439 | 95.77069499 |

**WZ-210**

|    |             |             |             |
|----|-------------|-------------|-------------|
| O  | 16.24633117 | 20.63013138 | 71.98912474 |
| O  | 11.28311980 | 23.39952330 | 72.23676097 |
| O  | 14.59467331 | 23.46009398 | 72.36254860 |
| O  | 17.89797810 | 23.46009037 | 72.36253616 |
| O  | 21.20951451 | 23.39950430 | 72.23671497 |
| O  | 9.66028429  | 26.20982704 | 72.23777749 |
| O  | 12.93245308 | 26.22624061 | 72.45250225 |
| O  | 16.24632427 | 26.28509412 | 72.39211245 |
| O  | 19.56018966 | 26.22623786 | 72.45248426 |
| O  | 22.83234099 | 26.20981256 | 72.23775411 |
| O  | 11.36793144 | 29.04873754 | 72.36378986 |
| O  | 14.64014324 | 29.06726813 | 72.39301416 |
| O  | 17.85250788 | 29.06726544 | 72.39300559 |
| O  | 21.12471419 | 29.04874083 | 72.36376912 |
| O  | 9.74357575  | 31.89458963 | 71.98982900 |
| O  | 13.01982914 | 31.91019213 | 72.36434360 |
| O  | 16.24633235 | 31.96674375 | 72.45376232 |
| O  | 19.47282238 | 31.91019255 | 72.36432224 |
| O  | 22.74907410 | 31.89460242 | 71.98979942 |
| O  | 14.62370776 | 34.80878325 | 72.23981163 |
| O  | 17.86897002 | 34.80879792 | 72.23981625 |
| Zn | 14.90047567 | 21.62891243 | 72.77827700 |
| O  | 14.58610312 | 21.45821950 | 74.67424029 |
| Zn | 16.24634661 | 20.90183681 | 75.43504232 |
| O  | 16.24634580 | 20.53613662 | 77.31125195 |
| Zn | 17.59219604 | 21.62891157 | 72.77826193 |
| O  | 17.90658497 | 21.45821878 | 74.67422526 |
| Zn | 9.97797112  | 24.51926919 | 72.85072428 |
| O  | 9.60484360  | 24.30371820 | 74.73459776 |
| Zn | 11.22501599 | 23.61574663 | 75.52213328 |
| O  | 11.26114012 | 23.33819757 | 77.40983027 |
| Zn | 12.89624217 | 24.28192606 | 72.64171497 |
| O  | 12.88970347 | 24.28553500 | 74.81488563 |
| Zn | 14.55050226 | 23.34267680 | 75.28866473 |
| O  | 14.57645510 | 23.34355583 | 77.37931498 |
| Zn | 16.24632929 | 24.41089625 | 72.71552129 |
| O  | 16.24633831 | 24.30617047 | 74.86272331 |
| Zn | 17.94218166 | 23.34267831 | 75.28865369 |
| O  | 17.91624310 | 23.34355543 | 77.37930329 |
| Zn | 19.59641110 | 24.28192324 | 72.64169423 |

|    |             |             |             |
|----|-------------|-------------|-------------|
| O  | 19.60297174 | 24.28553558 | 74.81486561 |
| Zn | 21.26765347 | 23.61573930 | 75.52211480 |
| O  | 21.23155504 | 23.33818952 | 77.40980818 |
| Zn | 22.51465991 | 24.51924542 | 72.85068608 |
| O  | 22.88781443 | 24.30371272 | 74.73455110 |
| Zn | 9.81795614  | 26.05068133 | 75.52218269 |
| O  | 9.59549908  | 26.22229413 | 77.40974278 |
| Zn | 11.23043886 | 27.16678143 | 72.64228058 |
| O  | 11.22971143 | 27.15908781 | 74.81552851 |
| Zn | 12.94235656 | 26.23222169 | 75.29738141 |
| O  | 12.91309274 | 26.21534066 | 77.40906062 |
| Zn | 14.57601438 | 27.17540861 | 72.70299775 |
| O  | 14.58979496 | 27.18333234 | 74.86186973 |
| Zn | 16.24633984 | 26.22286616 | 75.33707987 |
| O  | 16.24634667 | 26.23314601 | 77.43093083 |
| Zn | 17.91664112 | 27.17540890 | 72.70299902 |
| O  | 17.90288048 | 27.18333051 | 74.86186812 |
| Zn | 19.55031975 | 26.23221750 | 75.29736980 |
| O  | 19.57960412 | 26.21533316 | 77.40904918 |
| Zn | 21.26219776 | 27.16678578 | 72.64226389 |
| O  | 21.26295101 | 27.15908841 | 74.81551188 |
| Zn | 22.67471267 | 26.05067147 | 75.52214700 |
| O  | 22.89718893 | 26.22228504 | 77.40970359 |
| Zn | 9.93517521  | 30.22959647 | 72.77893906 |
| O  | 9.62980100  | 30.04269873 | 74.67493008 |
| Zn | 11.24348477 | 29.06877812 | 75.28940276 |
| O  | 11.25746104 | 29.09162436 | 77.37997924 |
| Zn | 13.01699342 | 30.00423137 | 72.71646509 |
| O  | 12.92589522 | 30.05640025 | 74.86384330 |
| Zn | 14.58611014 | 29.09810420 | 75.33746697 |
| O  | 14.59521158 | 29.09310365 | 77.43135191 |
| Zn | 16.24633186 | 30.06875114 | 72.70369542 |
| O  | 16.24633520 | 30.05251031 | 74.86252957 |
| Zn | 17.90656299 | 29.09810189 | 75.33746444 |
| O  | 17.89747523 | 29.09310117 | 77.43134577 |
| Zn | 19.47565926 | 30.00423798 | 72.71646335 |
| O  | 19.56676995 | 30.05640242 | 74.86383805 |
| Zn | 21.24918254 | 29.06877774 | 75.28938812 |
| O  | 21.23522866 | 29.09162348 | 77.37996627 |
| Zn | 22.55746742 | 30.22960939 | 72.77892193 |
| O  | 22.86285968 | 30.04270094 | 74.67491147 |
| Zn | 9.97813803  | 31.75853260 | 75.43578843 |
| O  | 9.66169100  | 31.94209503 | 77.31202224 |
| Zn | 11.28098082 | 32.56121062 | 72.77953127 |
| O  | 11.29005829 | 32.91854630 | 74.67548288 |
| Zn | 12.93977394 | 32.00697313 | 75.28980238 |
| O  | 12.92802856 | 31.98410281 | 77.38031142 |

|    |             |             |             |
|----|-------------|-------------|-------------|
| Zn | 14.58071758 | 32.97029827 | 72.64353435 |
| O  | 14.58689322 | 32.97388258 | 74.81661552 |
| Zn | 16.24633918 | 31.95469640 | 75.29846684 |
| O  | 16.24634203 | 31.98874427 | 77.40998477 |
| Zn | 17.91194666 | 32.97030592 | 72.64352623 |
| O  | 17.90577595 | 32.97388119 | 74.81660707 |
| Zn | 19.55289838 | 32.00697341 | 75.28979513 |
| O  | 19.56466077 | 31.98410275 | 77.38030667 |
| Zn | 21.21167156 | 32.56121637 | 72.77952684 |
| O  | 21.20260410 | 32.91855107 | 74.67548067 |
| Zn | 22.51453172 | 31.75853699 | 75.43577327 |
| O  | 22.83099392 | 31.94209969 | 77.31200366 |
| Zn | 14.83969634 | 34.75034847 | 75.52397787 |
| O  | 14.58082190 | 34.85825323 | 77.41158997 |
| Zn | 16.24633504 | 35.37889525 | 72.85342402 |
| O  | 16.24633128 | 35.80909534 | 74.73730171 |
| Zn | 17.65297829 | 34.75035625 | 75.52395867 |
| O  | 17.91185840 | 34.85825222 | 77.41157269 |
| Zn | 14.83886375 | 21.56172904 | 78.12980203 |
| O  | 14.58190194 | 21.45039642 | 80.01483992 |
| Zn | 16.24636066 | 20.85223252 | 80.75153131 |
| O  | 16.24636252 | 20.51922600 | 82.64016497 |
| Zn | 17.65383522 | 21.56173178 | 78.12979464 |
| O  | 17.91081385 | 21.45039821 | 80.01482727 |
| Zn | 9.92369648  | 24.48887472 | 78.15100564 |
| O  | 9.63751690  | 24.32311647 | 80.03816052 |
| Zn | 11.26417796 | 23.62597959 | 80.78023722 |
| O  | 11.30471853 | 23.35172523 | 82.66979103 |
| Zn | 12.91402351 | 24.27593030 | 77.94718220 |
| O  | 12.93411818 | 24.31179973 | 80.01982850 |
| Zn | 14.57050298 | 23.33344416 | 80.58568958 |
| O  | 14.59512295 | 23.36857992 | 82.65081702 |
| Zn | 16.24635068 | 24.33778506 | 77.93138428 |
| O  | 16.24636098 | 24.30567660 | 80.01574808 |
| Zn | 17.92222004 | 23.33344581 | 80.58568557 |
| O  | 17.89761039 | 23.36857718 | 82.65081462 |
| Zn | 19.57867346 | 24.27592430 | 77.94717581 |
| O  | 19.55860092 | 24.31179630 | 80.01981886 |
| Zn | 21.22854142 | 23.62598083 | 80.78023542 |
| O  | 21.18801242 | 23.35172484 | 82.66978538 |
| Zn | 22.56899188 | 24.48887421 | 78.15098387 |
| O  | 22.85519158 | 24.32312575 | 80.03813279 |
| Zn | 9.84681781  | 26.08018116 | 80.78056430 |
| O  | 9.62917044  | 26.25341814 | 82.66994040 |
| Zn | 11.23368375 | 27.18551801 | 77.94718733 |
| O  | 11.27527534 | 27.18412645 | 80.01993795 |
| Zn | 12.96575387 | 26.24523279 | 80.59370291 |

|    |             |             |             |
|----|-------------|-------------|-------------|
| O  | 12.93827667 | 26.22964839 | 82.66236320 |
| Zn | 14.57046538 | 27.17215293 | 77.93895056 |
| O  | 14.59525968 | 27.18597019 | 80.02575918 |
| Zn | 16.24635986 | 26.21514069 | 80.56670867 |
| O  | 16.24636457 | 26.23975003 | 82.65047941 |
| Zn | 17.92223536 | 27.17214878 | 77.93894584 |
| O  | 17.89746017 | 27.18596633 | 80.02575559 |
| Zn | 19.52696743 | 26.24522923 | 80.59369683 |
| O  | 19.55445474 | 26.22964166 | 82.66235571 |
| Zn | 21.25901581 | 27.18551623 | 77.94717328 |
| O  | 21.21743799 | 27.18412727 | 80.01992033 |
| Zn | 22.64590066 | 26.08018519 | 80.78055019 |
| O  | 22.86355490 | 26.25341871 | 82.66992509 |
| Zn | 9.84599293  | 30.21051784 | 78.13050493 |
| O  | 9.62147673  | 30.04246591 | 80.01548156 |
| Zn | 11.24653403 | 29.09039235 | 80.58565969 |
| O  | 11.28909664 | 29.09493844 | 82.65090554 |
| Zn | 12.95356922 | 30.04059558 | 77.93157143 |
| O  | 12.92640079 | 30.05607524 | 80.01613109 |
| Zn | 14.58019835 | 29.10116038 | 80.56673835 |
| O  | 14.60133789 | 29.08954505 | 82.65056955 |
| Zn | 16.24634577 | 30.07497213 | 77.93946539 |
| O  | 16.24635573 | 30.04609104 | 80.02617756 |
| Zn | 17.91251107 | 29.10115544 | 80.56673583 |
| O  | 17.89138275 | 29.08954093 | 82.65056497 |
| Zn | 19.53911865 | 30.04059311 | 77.93156747 |
| O  | 19.56630474 | 30.05606857 | 80.01612288 |
| Zn | 21.24617419 | 29.09039238 | 80.58565076 |
| O  | 21.20362573 | 29.09493855 | 82.65089764 |
| Zn | 22.64669212 | 30.21052066 | 78.13048827 |
| O  | 22.87122589 | 30.04246771 | 80.01546229 |
| Zn | 9.93578395  | 31.78298184 | 80.75198646 |
| O  | 9.64707092  | 31.95020715 | 82.64053186 |
| Zn | 11.25377451 | 32.64801298 | 78.13052915 |
| O  | 11.28614677 | 32.92544393 | 80.01568817 |
| Zn | 12.92273656 | 31.99348971 | 80.58601048 |
| O  | 12.94074540 | 31.95532238 | 82.65120965 |
| Zn | 14.56657200 | 32.95782530 | 77.94834584 |
| O  | 14.58804449 | 32.92204785 | 80.02090538 |
| Zn | 16.24635692 | 31.92739025 | 80.59478794 |
| O  | 16.24635919 | 31.96000357 | 82.66319307 |
| Zn | 17.92611690 | 32.95783078 | 77.94833542 |
| O  | 17.90466618 | 32.92204356 | 80.02089551 |
| Zn | 19.56997720 | 31.99348177 | 80.58600477 |
| O  | 19.55197796 | 31.95531408 | 82.65120351 |
| Zn | 21.23891467 | 32.64801307 | 78.13051960 |
| O  | 21.20656073 | 32.92543938 | 80.01568193 |



|    |             |             |             |
|----|-------------|-------------|-------------|
| Zn | 22.55693261 | 31.78298402 | 80.75197741 |
| O  | 22.84564900 | 31.95020736 | 82.64052398 |
| Zn | 14.82902314 | 34.71119605 | 80.78121562 |
| O  | 14.57082792 | 34.81397055 | 82.67071876 |
| Zn | 16.24634550 | 35.44113151 | 78.15216270 |
| O  | 16.24636122 | 35.77122199 | 80.03948440 |
| Zn | 17.66369875 | 34.71119518 | 80.78120396 |
| O  | 17.92189770 | 34.81396632 | 82.67070941 |
| Zn | 14.83137230 | 21.56920602 | 83.39682384 |
| O  | 14.57241855 | 21.46644519 | 85.28589889 |
| Zn | 16.24637265 | 20.84666525 | 85.98501432 |
| O  | 16.24636843 | 20.50286299 | 87.87349479 |
| Zn | 17.66135833 | 21.56920686 | 83.39682475 |
| O  | 17.92032657 | 21.46644521 | 85.28589412 |
| Zn | 9.93740826  | 24.49677114 | 83.37243749 |
| O  | 9.64405049  | 24.32674814 | 85.26366384 |
| Zn | 11.25731026 | 23.62379347 | 86.01937197 |
| O  | 11.29741304 | 23.34904407 | 87.90966098 |
| Zn | 12.93075328 | 24.28927153 | 83.23435739 |
| O  | 12.94468478 | 24.32713130 | 85.29627411 |
| Zn | 14.56916347 | 23.33536178 | 85.87016857 |
| O  | 14.59261432 | 23.36143833 | 87.93350282 |
| Zn | 16.24636806 | 24.35998688 | 83.23815851 |
| O  | 16.24637507 | 24.32177112 | 85.30427106 |
| Zn | 17.92358710 | 23.33536267 | 85.87017010 |
| O  | 17.90012871 | 23.36143557 | 87.93350362 |
| Zn | 19.56197733 | 24.28926733 | 83.23436373 |
| O  | 19.54806236 | 24.32713081 | 85.29627996 |
| Zn | 21.23543964 | 23.62380080 | 86.01939127 |
| O  | 21.19533653 | 23.34905767 | 87.90967818 |
| Zn | 22.55531499 | 24.49677938 | 83.37243683 |
| O  | 22.84868686 | 24.32676283 | 85.26365769 |
| Zn | 9.84190775  | 26.07505462 | 86.01976387 |
| O  | 9.62377648  | 26.24758116 | 87.91000772 |
| Zn | 11.25395105 | 27.19322517 | 83.23441866 |
| O  | 11.29428330 | 27.18521505 | 85.29638184 |
| Zn | 12.97126462 | 26.24797297 | 85.88705797 |
| O  | 12.93383901 | 26.22648653 | 87.95634737 |
| Zn | 14.58717309 | 27.18172240 | 83.22079188 |
| O  | 14.60397455 | 27.19070308 | 85.30177405 |
| Zn | 16.24637318 | 26.21962971 | 85.87394386 |
| O  | 16.24637072 | 26.23638450 | 87.95920434 |
| Zn | 17.90556260 | 27.18171878 | 83.22079428 |
| O  | 17.88877227 | 27.19069927 | 85.30177687 |
| Zn | 19.52148236 | 26.24797228 | 85.88706940 |
| O  | 19.55890742 | 26.22648817 | 87.95635661 |
| Zn | 21.23878066 | 27.19322725 | 83.23441899 |

|    |             |             |             |
|----|-------------|-------------|-------------|
| O  | 21.19845344 | 27.18521732 | 85.29637768 |
| Zn | 22.65083225 | 26.07506276 | 86.01977087 |
| O  | 22.86896203 | 26.24759405 | 87.91001258 |
| Zn | 9.84920339  | 30.19976541 | 83.39675229 |
| O  | 9.63120580  | 30.02594522 | 85.28583861 |
| Zn | 11.24807365 | 29.08804542 | 85.86952336 |
| O  | 11.28226784 | 29.09592111 | 87.93284939 |
| Zn | 12.97324120 | 30.02943657 | 83.23775862 |
| O  | 12.94093629 | 30.04774053 | 85.30407786 |
| Zn | 14.58456636 | 29.09848430 | 85.87369538 |
| O  | 14.59890918 | 29.09060672 | 87.95904630 |
| Zn | 16.24636401 | 30.05592610 | 83.22107173 |
| O  | 16.24636962 | 30.03618501 | 85.30197253 |
| Zn | 17.90816922 | 29.09847862 | 85.87370200 |
| O  | 17.89382058 | 29.09060035 | 87.95904970 |
| Zn | 19.51948134 | 30.02943062 | 83.23776313 |
| O  | 19.55179555 | 30.04773113 | 85.30408099 |
| Zn | 21.24465756 | 29.08804128 | 85.86953535 |
| O  | 21.21046076 | 29.09591543 | 87.93286208 |
| Zn | 22.64351443 | 30.19976583 | 83.39675138 |
| O  | 22.86152062 | 30.02594149 | 85.28583407 |
| Zn | 9.93118213  | 31.78559327 | 85.98470559 |
| O  | 9.63339022  | 31.95788493 | 87.87319772 |
| Zn | 11.26415673 | 32.65045770 | 83.39672209 |
| O  | 11.30512407 | 32.92532958 | 85.28596880 |
| Zn | 12.92541473 | 31.99338630 | 85.86967722 |
| O  | 12.93608019 | 31.96049559 | 87.93306426 |
| Zn | 14.56980596 | 32.93705488 | 83.23504256 |
| O  | 14.59629349 | 32.90548197 | 85.29694585 |
| Zn | 16.24637216 | 31.92141858 | 85.88734110 |
| O  | 16.24637425 | 31.96506596 | 87.95644271 |
| Zn | 17.92292103 | 32.93705398 | 83.23503691 |
| O  | 17.89644827 | 32.90547243 | 85.29693612 |
| Zn | 19.56732189 | 31.99337341 | 85.86968822 |
| O  | 19.55664783 | 31.96048524 | 87.93307665 |
| Zn | 21.22856547 | 32.65045041 | 83.39672043 |
| O  | 21.18760624 | 32.92531769 | 85.28596925 |
| Zn | 22.56155333 | 31.78558960 | 85.98471100 |
| O  | 22.85933555 | 31.95787950 | 87.87320498 |
| Zn | 14.83084733 | 34.71850597 | 86.01995017 |
| O  | 14.57267745 | 34.82152094 | 87.91031823 |
| Zn | 16.24636712 | 35.42537400 | 83.37297103 |
| O  | 16.24638019 | 35.76402379 | 85.26437655 |
| Zn | 17.66190908 | 34.71849786 | 86.01993806 |
| O  | 17.92008830 | 34.82151203 | 87.91030591 |
| Zn | 14.82974442 | 21.53673595 | 88.63943928 |
| O  | 14.57464427 | 21.42704895 | 90.52933621 |

|    |             |             |             |
|----|-------------|-------------|-------------|
| Zn | 16.24636672 | 20.79981358 | 91.23648375 |
| O  | 16.24634523 | 20.44356036 | 93.12652260 |
| Zn | 17.66299291 | 21.53673915 | 88.63944707 |
| O  | 17.91809026 | 21.42705038 | 90.52934034 |
| Zn | 9.92125221  | 24.48672543 | 88.60904249 |
| O  | 9.61844602  | 24.31170577 | 90.49666602 |
| Zn | 11.20651717 | 23.59236664 | 91.28139035 |
| O  | 11.22586920 | 23.33209176 | 93.18088901 |
| Zn | 12.91600584 | 24.26922947 | 88.50313075 |
| O  | 12.91739298 | 24.29557044 | 90.57489065 |
| Zn | 14.54583676 | 23.28501874 | 91.12017907 |
| O  | 14.56197681 | 23.27995198 | 93.20598403 |
| Zn | 16.24637322 | 24.33681326 | 88.51927612 |
| O  | 16.24636696 | 24.28674259 | 90.59651043 |
| Zn | 17.94689909 | 23.28501961 | 91.12019482 |
| O  | 17.93072403 | 23.27994552 | 93.20599475 |
| Zn | 19.57673242 | 24.26923138 | 88.50314317 |
| O  | 19.57532749 | 24.29557614 | 90.57489360 |
| Zn | 21.28620415 | 23.59235608 | 91.28138980 |
| O  | 21.26678917 | 23.33202643 | 93.18086419 |
| Zn | 22.57148617 | 24.48675371 | 88.60907281 |
| O  | 22.87427904 | 24.31171908 | 90.49669154 |
| Zn | 9.78949728  | 26.04759498 | 91.27912516 |
| O  | 9.57102627  | 26.19786688 | 93.17771336 |
| Zn | 11.22986977 | 27.19009583 | 88.50244227 |
| O  | 11.25406631 | 27.17774823 | 90.57388014 |
| Zn | 12.92412404 | 26.22078148 | 91.12480511 |
| O  | 12.88387298 | 26.19861296 | 93.23496518 |
| Zn | 14.57729103 | 27.17557543 | 88.50928245 |
| O  | 14.58765586 | 27.18108861 | 90.61147053 |
| Zn | 16.24636344 | 26.19036842 | 91.09939780 |
| O  | 16.24634572 | 26.19550890 | 93.23696789 |
| Zn | 17.91545440 | 27.17557113 | 88.50929631 |
| O  | 17.90507632 | 27.18108507 | 90.61148598 |
| Zn | 19.56860526 | 26.22077599 | 91.12484022 |
| O  | 19.60882048 | 26.19860011 | 93.23499842 |
| Zn | 21.26287777 | 27.19009789 | 88.50248639 |
| O  | 21.23867317 | 27.17773806 | 90.57392726 |
| Zn | 22.70321394 | 26.04756546 | 91.27923699 |
| O  | 22.92161673 | 26.19778488 | 93.17783868 |
| Zn | 9.82104406  | 30.21404642 | 88.63870569 |
| O  | 9.59846710  | 30.04742797 | 90.52861474 |
| Zn | 11.19277508 | 29.09286149 | 91.11962941 |
| O  | 11.19602083 | 29.11036820 | 93.20548174 |
| Zn | 12.95377382 | 30.04047715 | 88.51843474 |
| O  | 12.91064919 | 30.06479979 | 90.59586371 |
| Zn | 14.55932685 | 29.11296256 | 91.09877313 |

|    |             |             |             |
|----|-------------|-------------|-------------|
| O  | 14.56336717 | 29.11090434 | 93.23641974 |
| Zn | 16.24636865 | 30.06723594 | 88.50917056 |
| O  | 16.24636307 | 30.05478859 | 90.61127723 |
| Zn | 17.93339536 | 29.11295987 | 91.09879055 |
| O  | 17.92931998 | 29.11090160 | 93.23642551 |
| Zn | 19.53895596 | 30.04046791 | 88.51845795 |
| O  | 19.58207337 | 30.06479253 | 90.59588434 |
| Zn | 21.29995376 | 29.09285763 | 91.11967266 |
| O  | 21.29668897 | 29.11037541 | 93.20552116 |
| Zn | 22.67167665 | 30.21404462 | 88.63872640 |
| O  | 22.89425036 | 30.04742231 | 90.52862921 |
| Zn | 9.89034621  | 31.80901483 | 91.23523713 |
| O  | 9.58190313  | 31.98811854 | 93.12525180 |
| Zn | 11.23729620 | 32.66768968 | 88.63872012 |
| O  | 11.27012083 | 32.94279870 | 90.52877354 |
| Zn | 12.89353841 | 32.03810477 | 91.11908416 |
| O  | 12.88069434 | 32.02721725 | 93.20488412 |
| Zn | 14.56019179 | 32.95927303 | 88.50232608 |
| O  | 14.58246735 | 32.94375577 | 90.57384461 |
| Zn | 16.24635984 | 31.97572854 | 91.12399665 |
| O  | 16.24633591 | 32.02167931 | 93.23390645 |
| Zn | 17.93255362 | 32.95928126 | 88.50235776 |
| O  | 17.91025940 | 32.94377926 | 90.57388880 |
| Zn | 19.59919183 | 32.03809983 | 91.11911180 |
| O  | 19.61201374 | 32.02721534 | 93.20491247 |
| Zn | 21.25543341 | 32.66767839 | 88.63873411 |
| O  | 21.22260246 | 32.94278610 | 90.52878519 |
| Zn | 22.60236960 | 31.80900329 | 91.23527044 |
| O  | 22.91079328 | 31.98811903 | 93.12527818 |
| Zn | 14.82794277 | 34.77719879 | 91.27874249 |
| O  | 14.59051191 | 34.89137410 | 93.17808314 |
| Zn | 16.24639293 | 35.44420685 | 88.60919662 |
| O  | 16.24637490 | 35.79339787 | 90.49714403 |
| Zn | 17.66474066 | 34.77719926 | 91.27885417 |
| O  | 17.90201689 | 34.89136724 | 93.17823212 |
| Zn | 14.76747543 | 21.40166096 | 93.87287211 |
| O  | 14.52758128 | 21.33247444 | 95.81610705 |
| Zn | 16.24631656 | 20.77125572 | 96.37671281 |
| Zn | 17.72520591 | 21.40166286 | 93.87290182 |
| O  | 17.96505900 | 21.33248347 | 95.81613419 |
| Zn | 9.80271530  | 24.42247711 | 93.90150562 |
| O  | 9.55121765  | 24.27390638 | 95.83327409 |
| Zn | 11.19307323 | 23.38744223 | 96.23728924 |
| Zn | 12.87770531 | 24.20677664 | 93.71645332 |
| O  | 12.93358465 | 24.27515793 | 95.88393111 |
| Zn | 14.55159653 | 23.22949596 | 96.16017871 |
| Zn | 16.24635640 | 24.23761728 | 93.66531451 |

|    |             |             |             |
|----|-------------|-------------|-------------|
| O  | 16.24634533 | 24.24285335 | 95.86078384 |
| Zn | 17.94110696 | 23.22950195 | 96.16021157 |
| Zn | 19.61500687 | 24.20674720 | 93.71651481 |
| O  | 19.55910520 | 24.27517678 | 95.88394907 |
| Zn | 21.29957421 | 23.38736101 | 96.23759736 |
| Zn | 22.68987867 | 24.42237320 | 93.90162295 |
| O  | 22.94139425 | 24.27389810 | 95.83338713 |
| Zn | 9.60511570  | 26.13788911 | 96.24645935 |
| Zn | 11.15462584 | 27.18825397 | 93.71686365 |
| O  | 11.24305588 | 27.20191748 | 95.88387785 |
| Zn | 12.90947869 | 26.21297301 | 96.01744828 |
| Zn | 14.55068837 | 27.16017992 | 93.61415328 |
| O  | 14.60030661 | 27.18922497 | 95.82631639 |
| Zn | 16.24632525 | 26.16739752 | 95.96412889 |
| Zn | 17.94201090 | 27.16017552 | 93.61416442 |
| O  | 17.89234622 | 27.18922014 | 95.82633054 |
| Zn | 19.58317928 | 26.21297789 | 96.01748177 |
| Zn | 21.33805235 | 27.18826855 | 93.71691144 |
| O  | 21.24959717 | 27.20195404 | 95.88394192 |
| Zn | 22.88746478 | 26.13786723 | 96.24644228 |
| Zn | 9.67312869  | 30.22850581 | 93.87177331 |
| O  | 9.49339835  | 30.05631469 | 95.81521453 |
| Zn | 11.14678576 | 29.12600266 | 96.15953747 |
| Zn | 12.86797530 | 30.08965912 | 93.66447266 |
| O  | 12.87176483 | 30.08800131 | 95.86005393 |
| Zn | 14.53848755 | 29.12566404 | 95.96373528 |
| Zn | 16.24634597 | 30.09731579 | 93.61355498 |
| O  | 16.24632231 | 30.04056509 | 95.82582724 |
| Zn | 17.95414462 | 29.12565353 | 95.96374987 |
| Zn | 19.62472485 | 30.08965013 | 93.66450050 |
| O  | 19.62087552 | 30.08797018 | 95.86006431 |
| Zn | 21.34587168 | 29.12604018 | 96.15963264 |
| Zn | 22.81956638 | 30.22853970 | 93.87187479 |
| O  | 22.99925965 | 30.05633508 | 95.81529080 |
| Zn | 9.86691713  | 31.82553705 | 96.37445439 |
| Zn | 11.15165652 | 32.78968300 | 93.87056847 |
| O  | 11.21235534 | 33.03289399 | 95.81386589 |
| Zn | 12.84266942 | 32.06255837 | 96.15845733 |
| Zn | 14.52485554 | 33.02364963 | 93.71495161 |
| O  | 14.55682164 | 32.94184760 | 95.88224548 |
| Zn | 16.24633401 | 31.99286991 | 96.01682316 |
| Zn | 17.96782845 | 33.02359559 | 93.71493663 |
| O  | 17.93590073 | 32.94180336 | 95.88228836 |
| Zn | 19.65005101 | 32.06250026 | 96.15851927 |
| Zn | 21.34106518 | 32.78967409 | 93.87064016 |
| O  | 21.28032358 | 33.03289752 | 95.81391523 |
| Zn | 22.62572583 | 31.82553818 | 96.37468301 |

|    |             |             |             |
|----|-------------|-------------|-------------|
| Zn | 14.65796637 | 34.89356856 | 96.23279651 |
| Zn | 16.24621075 | 35.58004567 | 93.89591672 |
| O  | 16.24630654 | 35.87300600 | 95.82801265 |
| Zn | 17.83457402 | 34.89347971 | 96.23247158 |

**WZ-236**

|    |             |             |            |
|----|-------------|-------------|------------|
| Zn | 11.09039159 | 15.09799373 | 8.01790506 |
| O  | 9.99871225  | 14.76928103 | 9.46230170 |
| O  | 11.96803283 | 16.07678141 | 6.74441221 |
| Zn | 13.15523963 | 16.90583697 | 8.34301340 |
| O  | 12.94516566 | 15.16886811 | 9.35198384 |
| Zn | 16.28157741 | 15.53576555 | 8.03415660 |
| O  | 16.20778870 | 14.72081035 | 9.64318268 |
| O  | 16.51559093 | 16.58764922 | 6.61864606 |
| O  | 6.55308364  | 18.80743498 | 7.71327846 |
| Zn | 8.31904037  | 18.13835344 | 7.52131054 |
| O  | 8.38493631  | 17.67364231 | 9.42084722 |
| O  | 9.87384911  | 18.88861486 | 6.65947740 |
| Zn | 11.42873944 | 17.86194190 | 6.58879201 |
| O  | 11.51388554 | 17.69329949 | 9.67796852 |
| O  | 13.38657413 | 18.49425949 | 6.96264039 |
| Zn | 15.27292428 | 18.09214867 | 6.54758729 |
| O  | 14.52700406 | 17.59177490 | 9.73487977 |
| O  | 16.79780367 | 19.26809846 | 6.67065981 |
| Zn | 17.98274373 | 17.90395965 | 7.45642089 |
| O  | 17.63095388 | 17.50751607 | 9.52798571 |
| O  | 19.78435040 | 18.25461419 | 8.01032823 |
| Zn | 6.85504126  | 20.67422682 | 7.52527298 |
| O  | 6.48749512  | 20.95833655 | 9.42412289 |
| O  | 8.28494209  | 21.63372908 | 6.65508296 |
| Zn | 9.63572248  | 20.58634874 | 7.55781237 |
| O  | 9.76781292  | 20.65714588 | 9.48803612 |
| Zn | 13.44261540 | 20.22297122 | 7.85238322 |
| O  | 12.98411360 | 20.54157780 | 9.72103083 |
| O  | 14.58410320 | 21.53938274 | 7.15988918 |
| Zn | 16.17894372 | 20.65990927 | 7.72470706 |
| O  | 16.24297268 | 20.54763433 | 9.69710787 |
| Zn | 20.33831970 | 19.97561451 | 7.59519949 |
| O  | 19.55157696 | 20.59154294 | 9.55059896 |
| O  | 21.19071019 | 21.35457863 | 6.82409614 |
| Zn | 5.62035740  | 24.60326390 | 8.02379704 |
| O  | 4.78796239  | 23.80982375 | 9.46240338 |
| O  | 6.90976355  | 24.86078478 | 6.74584742 |
| Zn | 8.17935356  | 23.49520979 | 6.58640853 |
| O  | 8.07625043  | 23.64994860 | 9.67139474 |
| O  | 9.71420239  | 24.85904038 | 6.94958542 |

|    |             |             |             |
|----|-------------|-------------|-------------|
| Zn | 11.23423123 | 24.04631054 | 7.84557045  |
| O  | 11.27949737 | 23.49327909 | 9.71522809  |
| O  | 12.94796380 | 24.37108739 | 7.15459739  |
| Zn | 14.56371159 | 23.41846069 | 7.62307509  |
| O  | 14.59268965 | 23.43601347 | 9.73296847  |
| O  | 16.18335415 | 24.34537631 | 7.09115948  |
| Zn | 17.90845872 | 23.75663529 | 7.62298464  |
| O  | 17.88526748 | 23.40104776 | 9.58433077  |
| O  | 19.56382381 | 24.37434357 | 6.92666107  |
| Zn | 20.77261486 | 22.99645122 | 7.53376136  |
| O  | 21.15536912 | 23.39081620 | 9.40872225  |
| Zn | 8.21906999  | 25.46819306 | 8.33742974  |
| O  | 6.60304877  | 26.15134673 | 9.34755292  |
| Zn | 10.30624946 | 26.69077977 | 6.52502183  |
| O  | 9.49372620  | 26.30324567 | 9.72274376  |
| O  | 12.08814245 | 27.42438650 | 6.64551778  |
| Zn | 12.97814587 | 26.19707087 | 7.70833905  |
| O  | 12.91156610 | 26.30742219 | 9.67960640  |
| Zn | 16.52980891 | 26.13791069 | 7.61745660  |
| O  | 16.20616914 | 26.30208450 | 9.57555864  |
| O  | 17.89131736 | 27.26170536 | 6.91623763  |
| Zn | 19.33240289 | 26.17099336 | 7.61281383  |
| O  | 19.50654615 | 26.27631501 | 9.51982488  |
| Zn | 8.59536315  | 28.84035496 | 8.01407732  |
| O  | 7.85001071  | 29.19167421 | 9.61924585  |
| O  | 9.62234416  | 28.51657809 | 6.59670195  |
| Zn | 11.49169978 | 29.13177144 | 7.43354032  |
| O  | 10.97081648 | 29.02726745 | 9.50221057  |
| O  | 12.69722125 | 30.51624577 | 7.98726264  |
| Zn | 14.46293999 | 30.13017955 | 7.57320581  |
| O  | 14.60277086 | 29.14651436 | 9.52277964  |
| O  | 16.08323971 | 30.17585691 | 6.79829854  |
| Zn | 17.29617403 | 28.99848275 | 7.51483397  |
| O  | 17.82504544 | 29.14084965 | 9.38816762  |
| Zn | 8.66364132  | 15.90543838 | 10.16838508 |
| O  | 8.15681338  | 15.89066006 | 11.99365916 |
| Zn | 9.51488930  | 15.25707305 | 13.10646727 |
| O  | 9.61594789  | 14.92283055 | 14.93523107 |
| Zn | 11.47541909 | 15.79068894 | 10.49124537 |
| O  | 11.33190773 | 15.81217508 | 12.41672543 |
| Zn | 12.96180360 | 15.18366901 | 13.26767143 |
| O  | 12.92092929 | 14.84208024 | 15.09662259 |
| Zn | 14.55678842 | 15.55995772 | 10.36959040 |
| O  | 14.58649555 | 15.70765837 | 12.35727103 |
| Zn | 16.30098244 | 15.14893565 | 13.20931348 |
| O  | 16.21706058 | 14.84341299 | 15.05601893 |
| Zn | 17.51299264 | 15.87235671 | 10.53469127 |

|    |             |             |             |
|----|-------------|-------------|-------------|
| O  | 17.86666074 | 15.74166340 | 12.35860717 |
| Zn | 6.68859431  | 18.88787586 | 9.79681414  |
| O  | 6.55437723  | 18.80887011 | 11.71528972 |
| Zn | 7.91015694  | 17.76174479 | 12.60418249 |
| O  | 7.99551412  | 17.75241066 | 14.70543397 |
| Zn | 9.92841744  | 18.71810443 | 10.20344844 |
| O  | 9.73275887  | 18.72740476 | 12.20595664 |
| Zn | 11.27951271 | 17.80150251 | 13.01075129 |
| O  | 11.29475727 | 17.69842877 | 15.00425314 |
| Zn | 13.02656225 | 18.68046970 | 10.49873949 |
| O  | 12.98396057 | 18.68260453 | 12.46920375 |
| Zn | 14.65452232 | 17.72154807 | 13.00245943 |
| O  | 14.59847528 | 17.65474301 | 15.01357393 |
| Zn | 16.16630130 | 18.61306793 | 10.25952299 |
| O  | 16.24072401 | 18.61949695 | 12.29432460 |
| Zn | 18.05004794 | 17.67450937 | 12.81649720 |
| O  | 17.91098906 | 17.69433412 | 14.86927735 |
| Zn | 19.35018078 | 18.61194275 | 9.96737804  |
| O  | 19.43846013 | 18.61749587 | 11.91671965 |
| Zn | 5.09781021  | 22.09028844 | 10.17651114 |
| O  | 4.83658058  | 21.65841882 | 12.00151434 |
| Zn | 6.32825614  | 20.50696439 | 12.61215085 |
| O  | 6.36200439  | 20.59026187 | 14.71347939 |
| Zn | 8.16568726  | 21.77026611 | 10.20745911 |
| O  | 8.08092798  | 21.59243133 | 12.20809236 |
| Zn | 9.66622932  | 20.60022775 | 12.89499117 |
| O  | 9.66343963  | 20.59397435 | 14.92479233 |
| Zn | 11.39243126 | 21.59435902 | 10.29603021 |
| O  | 11.34286187 | 21.56033160 | 12.30064783 |
| Zn | 12.97852201 | 20.62467464 | 13.01574867 |
| O  | 12.95337774 | 20.57384910 | 15.02496342 |
| Zn | 14.65505139 | 21.58470083 | 10.35601401 |
| O  | 14.62166148 | 21.52881874 | 12.36198672 |
| Zn | 16.30458986 | 20.53188341 | 12.89097440 |
| O  | 16.25088891 | 20.54987251 | 14.94235727 |
| Zn | 17.95694395 | 21.52058630 | 10.22483732 |
| O  | 17.91051834 | 21.49654392 | 12.25744296 |
| Zn | 19.64842571 | 20.37627103 | 12.67363956 |
| O  | 19.55147930 | 20.51324697 | 14.77617311 |
| Zn | 20.92525758 | 21.75836779 | 10.30724303 |
| O  | 21.17543861 | 21.49503154 | 12.17607153 |
| Zn | 4.97569285  | 23.14937007 | 13.11965956 |
| O  | 4.73561685  | 23.40712430 | 14.94621475 |
| Zn | 6.41278204  | 24.57347748 | 10.49598595 |
| O  | 6.36503418  | 24.43889677 | 12.41970800 |
| Zn | 8.05458442  | 23.39773814 | 13.01952027 |
| O  | 7.97494047  | 23.45703149 | 15.00978781 |



|    |             |             |             |
|----|-------------|-------------|-------------|
| Zn | 9.68714181  | 24.46446790 | 10.49507315 |
| O  | 9.67294067  | 24.42139155 | 12.46260218 |
| Zn | 11.34754472 | 23.45150717 | 13.01555522 |
| O  | 11.29535755 | 23.44397866 | 15.02204870 |
| Zn | 13.01709114 | 24.42078031 | 10.34977787 |
| O  | 12.95608114 | 24.41093876 | 12.35427238 |
| Zn | 14.63263498 | 23.46295289 | 12.93875408 |
| O  | 14.60998250 | 23.44295844 | 14.96734868 |
| Zn | 16.28094466 | 24.41229280 | 10.22195067 |
| O  | 16.26395209 | 24.39994203 | 12.26765514 |
| Zn | 17.88476261 | 23.38286285 | 12.84682761 |
| O  | 17.91452267 | 23.43397508 | 14.88825462 |
| Zn | 19.70759122 | 24.46544565 | 10.11407656 |
| O  | 19.55539048 | 24.37529718 | 12.16406544 |
| Zn | 20.89414953 | 23.17257811 | 12.98337528 |
| O  | 21.15526382 | 23.41661097 | 14.84173996 |
| Zn | 6.64036399  | 26.16607804 | 13.27860472 |
| O  | 6.32121031  | 26.29699169 | 15.10376381 |
| Zn | 7.74762467  | 27.35214026 | 10.36687877 |
| O  | 7.89975994  | 27.30186049 | 12.34891018 |
| Zn | 9.67295206  | 26.35366121 | 13.00221728 |
| O  | 9.58645030  | 26.32982021 | 15.00501120 |
| Zn | 11.19786553 | 27.21280530 | 10.24858782 |
| O  | 11.24328651 | 27.26742964 | 12.27712754 |
| Zn | 12.92698869 | 26.37261758 | 12.88530728 |
| O  | 12.91802869 | 26.30554512 | 14.92817670 |
| Zn | 14.60812849 | 27.30605949 | 10.21097487 |
| O  | 14.56571493 | 27.27412165 | 12.23859661 |
| Zn | 16.18419264 | 26.31906076 | 12.83910805 |
| O  | 16.24636827 | 26.31220647 | 14.87514286 |
| Zn | 18.03357289 | 27.35523188 | 10.10692867 |
| O  | 17.87726626 | 27.27359358 | 12.15363068 |
| Zn | 19.20971172 | 26.11567135 | 12.95022956 |
| O  | 19.49358775 | 26.27757238 | 14.81111814 |
| Zn | 8.27996494  | 29.06914964 | 13.21025666 |
| O  | 7.96578095  | 29.13662472 | 15.04940621 |
| Zn | 9.49815037  | 29.74619110 | 10.51432611 |
| O  | 9.56563712  | 30.11896896 | 12.33470419 |
| Zn | 11.32457063 | 29.31108215 | 12.81225722 |
| O  | 11.26369022 | 29.16834540 | 14.85718157 |
| Zn | 12.78513856 | 29.96196721 | 9.94724752  |
| O  | 12.83351181 | 30.03017296 | 11.89479736 |
| Zn | 14.45862136 | 29.34160058 | 12.66597158 |
| O  | 14.52988767 | 29.18120862 | 14.75743488 |
| Zn | 16.29468679 | 29.75676299 | 10.28776016 |
| O  | 16.18695696 | 30.10912025 | 12.15180593 |
| Zn | 17.49603571 | 29.03809827 | 12.97443068 |

|    |             |             |             |
|----|-------------|-------------|-------------|
| O  | 17.83803893 | 29.13619162 | 14.82853947 |
| Zn | 8.29184546  | 16.06209709 | 15.69109954 |
| O  | 7.99279378  | 15.90032165 | 17.53729009 |
| Zn | 9.52659599  | 15.25994393 | 18.42092070 |
| O  | 9.63233364  | 14.91791331 | 20.26366198 |
| Zn | 11.27850922 | 15.69909068 | 15.64459569 |
| O  | 11.26747049 | 15.83085654 | 17.65026022 |
| Zn | 12.90214599 | 15.23261305 | 18.48795519 |
| O  | 12.93149412 | 14.90958269 | 20.34453207 |
| Zn | 14.55957164 | 15.67357810 | 15.69276823 |
| O  | 14.58383732 | 15.80587506 | 17.69412474 |
| Zn | 16.32216071 | 15.19922125 | 18.41196169 |
| O  | 16.26254758 | 14.85312854 | 20.26808706 |
| Zn | 17.58501372 | 15.96756735 | 15.74677243 |
| O  | 17.90292802 | 15.82667721 | 17.60294858 |
| Zn | 6.70368317  | 18.90040732 | 15.60812402 |
| O  | 6.42300646  | 18.72707053 | 17.45285990 |
| Zn | 7.87627556  | 17.73723515 | 18.23491468 |
| O  | 8.01765651  | 17.74956321 | 20.24189246 |
| Zn | 9.68443554  | 18.70460909 | 15.56309288 |
| O  | 9.63656149  | 18.68252920 | 17.57932313 |
| Zn | 11.26720108 | 17.80137551 | 18.27563692 |
| O  | 11.31264169 | 17.71607695 | 20.30172488 |
| Zn | 12.95844623 | 18.64534666 | 15.61326238 |
| O  | 12.95821070 | 18.67426578 | 17.64910683 |
| Zn | 14.63223088 | 17.78457010 | 18.26498212 |
| O  | 14.63468287 | 17.69891861 | 20.29336651 |
| Zn | 16.21461514 | 18.66780676 | 15.57831411 |
| O  | 16.28801122 | 18.65026971 | 17.60911552 |
| Zn | 18.04088945 | 17.67907308 | 18.22565443 |
| O  | 17.95725281 | 17.69191718 | 20.26110889 |
| Zn | 19.24562258 | 18.84944588 | 15.69391814 |
| O  | 19.53446167 | 18.67592850 | 17.54517621 |
| Zn | 5.05702573  | 21.70320582 | 15.72071612 |
| O  | 4.78544802  | 21.51952854 | 17.56704189 |
| Zn | 6.30228948  | 20.47916502 | 18.25243071 |
| O  | 6.39804157  | 20.56672799 | 20.25839528 |
| Zn | 8.03923302  | 21.56707187 | 15.57421797 |
| O  | 8.01019425  | 21.51808365 | 17.58878552 |
| Zn | 9.64078106  | 20.57282544 | 18.25408582 |
| O  | 9.69513846  | 20.57856897 | 20.28405732 |
| Zn | 11.30881708 | 21.54393710 | 15.64103872 |
| O  | 11.31636024 | 21.52844161 | 17.65721929 |
| Zn | 12.97967185 | 20.59631459 | 18.27110091 |
| O  | 13.00628630 | 20.56800313 | 20.31050366 |
| Zn | 14.62497841 | 21.54648436 | 15.59526052 |
| O  | 14.63640771 | 21.52665555 | 17.62989587 |

|    |             |             |             |
|----|-------------|-------------|-------------|
| Zn | 16.31374847 | 20.56857177 | 18.19195019 |
| O  | 16.31148810 | 20.56905620 | 20.25200699 |
| Zn | 17.89473113 | 21.55565729 | 15.48654415 |
| O  | 17.94645417 | 21.51275092 | 17.53825852 |
| Zn | 19.66988939 | 20.49628830 | 18.16259590 |
| O  | 19.62645108 | 20.57335470 | 20.20432333 |
| Zn | 20.89428939 | 21.70685618 | 15.59681611 |
| O  | 21.17991869 | 21.51827775 | 17.46287242 |
| Zn | 5.02035928  | 23.15477255 | 18.48255121 |
| O  | 4.79362770  | 23.39498127 | 20.32762221 |
| Zn | 6.23686077  | 24.45647759 | 15.67340389 |
| O  | 6.36420251  | 24.37157271 | 17.67253855 |
| Zn | 8.06640608  | 23.38195530 | 18.29178275 |
| O  | 8.02735897  | 23.44283093 | 20.30455769 |
| Zn | 9.62764098  | 24.42660517 | 15.62149542 |
| O  | 9.67072685  | 24.38975934 | 17.64632085 |
| Zn | 11.33204368 | 23.44845868 | 18.27411239 |
| O  | 11.33875976 | 23.43948369 | 20.30169528 |
| Zn | 12.96941956 | 24.41172531 | 15.59825103 |
| O  | 12.97528779 | 24.39992634 | 17.62677537 |
| Zn | 14.62643446 | 23.44706374 | 18.23349777 |
| O  | 14.66149246 | 23.43354591 | 20.27746876 |
| Zn | 16.29536783 | 24.42672495 | 15.51378047 |
| O  | 16.26868418 | 24.40004040 | 17.56648830 |
| Zn | 17.88703706 | 23.39931356 | 18.15211525 |
| O  | 17.96166838 | 23.44782361 | 20.19527179 |
| Zn | 19.64279487 | 24.48452699 | 15.47483825 |
| O  | 19.56379477 | 24.41441305 | 17.51363904 |
| Zn | 20.94166087 | 23.21392508 | 18.25284203 |
| O  | 21.22672740 | 23.44706364 | 20.11142163 |
| Zn | 6.69052650  | 26.08202783 | 18.53779221 |
| O  | 6.41775049  | 26.25783317 | 20.38208239 |
| Zn | 7.85669371  | 27.29911182 | 15.72047127 |
| O  | 8.01005607  | 27.23988376 | 17.70888573 |
| Zn | 9.73592313  | 26.28597119 | 18.30620391 |
| O  | 9.66766814  | 26.29338350 | 20.31480088 |
| Zn | 11.27026173 | 27.21836657 | 15.58655531 |
| O  | 11.30893916 | 27.26595806 | 17.60277687 |
| Zn | 12.97300158 | 26.34290916 | 18.21208962 |
| O  | 12.99264829 | 26.29227172 | 20.24981417 |
| Zn | 14.60498139 | 27.23157689 | 15.48604740 |
| O  | 14.59987249 | 27.27656313 | 17.52316222 |
| Zn | 16.19343294 | 26.31010880 | 18.17700820 |
| O  | 16.28891264 | 26.31795405 | 20.21356454 |
| Zn | 18.00594692 | 27.29987564 | 15.47478621 |
| O  | 17.89845325 | 27.26411734 | 17.50695592 |
| Zn | 19.23194519 | 26.14424512 | 18.33720554 |

|    |             |             |             |
|----|-------------|-------------|-------------|
| O  | 19.52719321 | 26.30350693 | 20.19584662 |
| Zn | 8.36894716  | 29.02541947 | 18.50892651 |
| O  | 8.06501578  | 29.11284527 | 20.35764619 |
| Zn | 9.61337107  | 29.74311001 | 15.77790806 |
| O  | 9.66671809  | 30.06925691 | 17.62693515 |
| Zn | 11.34592201 | 29.27518083 | 18.25612054 |
| O  | 11.33737724 | 29.14243222 | 20.26025783 |
| Zn | 12.93184490 | 29.74530791 | 15.68182355 |
| O  | 12.93440177 | 30.07486452 | 17.52600313 |
| Zn | 14.56363129 | 29.28134485 | 18.17288638 |
| O  | 14.61405099 | 29.15174862 | 20.18506244 |
| Zn | 16.22585054 | 29.75440309 | 15.59822045 |
| O  | 16.20087426 | 30.08817001 | 17.45822726 |
| Zn | 17.54132108 | 29.05556066 | 18.28204873 |
| O  | 17.88629124 | 29.15980587 | 20.13260796 |
| Zn | 8.31612054  | 15.99242128 | 21.09802263 |
| O  | 7.96339264  | 15.84120212 | 22.92883854 |
| Zn | 9.45978583  | 15.21524264 | 23.83615725 |
| O  | 9.65535063  | 14.93488761 | 25.67794390 |
| Zn | 11.28135023 | 15.71549408 | 20.95129491 |
| O  | 11.24719516 | 15.80348726 | 22.98957013 |
| Zn | 12.97071711 | 15.21385192 | 23.62256281 |
| O  | 13.01231944 | 14.89829800 | 25.51106839 |
| Zn | 14.60323299 | 15.69285228 | 20.88033008 |
| O  | 14.66977426 | 15.78134858 | 22.91661114 |
| Zn | 16.34766004 | 15.16317413 | 23.71166240 |
| O  | 16.35533859 | 14.81173583 | 25.58910356 |
| Zn | 17.61223439 | 15.90829812 | 21.04901650 |
| O  | 17.95070148 | 15.77228007 | 22.90968024 |
| Zn | 6.70339365  | 18.87416991 | 21.14923728 |
| O  | 6.41199822  | 18.65724227 | 22.96799856 |
| Zn | 7.85255494  | 17.64680518 | 23.72086395 |
| O  | 8.04988235  | 17.59345681 | 25.73346358 |
| Zn | 9.71192340  | 18.70093687 | 20.96310835 |
| O  | 9.64102154  | 18.65446195 | 22.98223084 |
| Zn | 11.29132988 | 17.79175285 | 23.57824560 |
| O  | 11.38479652 | 17.70297937 | 25.63811955 |
| Zn | 12.97324660 | 18.64320185 | 20.90385788 |
| O  | 13.01049619 | 18.63854377 | 22.96326215 |
| Zn | 14.69661583 | 17.75218049 | 23.54098300 |
| O  | 14.77136913 | 17.60901304 | 25.57516300 |
| Zn | 16.24493102 | 18.67957245 | 20.87268797 |
| O  | 16.35920844 | 18.63264339 | 22.91278667 |
| Zn | 18.09580689 | 17.64168671 | 23.45514461 |
| O  | 18.14240427 | 17.58107189 | 25.51061489 |
| Zn | 19.31289205 | 18.84994999 | 21.01972982 |
| O  | 19.61932606 | 18.67817794 | 22.88622762 |

|    |             |             |             |
|----|-------------|-------------|-------------|
| Zn | 5.06600984  | 21.72908021 | 21.17314082 |
| O  | 4.81852685  | 21.48996564 | 23.01045348 |
| Zn | 6.30895603  | 20.43694785 | 23.74842829 |
| O  | 6.55145244  | 20.39017406 | 25.65527838 |
| Zn | 8.08267654  | 21.57881396 | 20.95789974 |
| O  | 8.04406817  | 21.51529221 | 22.94903486 |
| Zn | 9.66489840  | 20.57961062 | 23.60194631 |
| O  | 9.77397816  | 20.59901076 | 25.60429158 |
| Zn | 11.34561738 | 21.54147925 | 20.93033472 |
| O  | 11.37841450 | 21.51525498 | 22.96229312 |
| Zn | 13.01902314 | 20.57378941 | 23.55318106 |
| O  | 13.14288421 | 20.51564079 | 25.62389937 |
| Zn | 14.65624214 | 21.53688859 | 20.90461150 |
| O  | 14.72380683 | 21.50442740 | 22.97182830 |
| Zn | 16.41699314 | 20.53899247 | 23.49420295 |
| O  | 16.53074021 | 20.48832636 | 25.58426158 |
| Zn | 17.92912161 | 21.58377708 | 20.82449948 |
| O  | 18.03436235 | 21.52079207 | 22.86910929 |
| Zn | 19.76943084 | 20.52713141 | 23.41780243 |
| O  | 19.85987678 | 20.53758352 | 25.47455881 |
| Zn | 21.00848626 | 21.78414007 | 20.95686015 |
| O  | 21.30261355 | 21.57490379 | 22.81806260 |
| Zn | 5.07027755  | 23.14032330 | 23.87010888 |
| O  | 4.68387998  | 23.53408661 | 25.67182943 |
| Zn | 6.29773811  | 24.45163171 | 21.03038133 |
| O  | 6.40292497  | 24.36808595 | 23.04707895 |
| Zn | 8.11581377  | 23.36714108 | 23.65708697 |
| O  | 8.03673736  | 23.42571145 | 25.65484818 |
| Zn | 9.66316906  | 24.40265102 | 20.94775766 |
| O  | 9.71961097  | 24.38012232 | 22.97820696 |
| Zn | 11.37845947 | 23.44132183 | 23.59556754 |
| O  | 11.40082120 | 23.44146013 | 25.62614457 |
| Zn | 12.99618730 | 24.39495420 | 20.90602033 |
| O  | 13.04051098 | 24.38909991 | 22.93961326 |
| Zn | 14.68813983 | 23.45804493 | 23.52303233 |
| O  | 14.80653390 | 23.39895342 | 25.59443154 |
| Zn | 16.32846783 | 24.42769137 | 20.82813300 |
| O  | 16.35627014 | 24.41290868 | 22.89540041 |
| Zn | 17.97388337 | 23.41091630 | 23.47215625 |
| O  | 18.14398828 | 23.44041794 | 25.50578740 |
| Zn | 19.69308899 | 24.47711194 | 20.75820606 |
| O  | 19.66331035 | 24.40012267 | 22.80288007 |
| Zn | 21.03770124 | 23.27006223 | 23.61948701 |
| O  | 21.35614942 | 23.46414220 | 25.49073059 |
| Zn | 6.77085953  | 26.08091555 | 23.91115812 |
| O  | 6.51767208  | 26.24072958 | 25.76608986 |
| Zn | 7.92179228  | 27.27533716 | 21.02834776 |

|    |             |             |             |
|----|-------------|-------------|-------------|
| O  | 8.06641422  | 27.24980132 | 23.04420305 |
| Zn | 9.80189294  | 26.28671313 | 23.64219119 |
| O  | 9.72303275  | 26.34629778 | 25.64208381 |
| Zn | 11.32413783 | 27.18785415 | 20.93668969 |
| O  | 11.36554992 | 27.26648502 | 22.92815764 |
| Zn | 13.00381136 | 26.35406400 | 23.55899040 |
| O  | 13.04983823 | 26.27232789 | 25.56407133 |
| Zn | 14.64462571 | 27.21908313 | 20.89099190 |
| O  | 14.65544887 | 27.31861143 | 22.91486258 |
| Zn | 16.23892595 | 26.33385579 | 23.49187931 |
| O  | 16.37306773 | 26.32110843 | 25.55592725 |
| Zn | 18.01980362 | 27.33970593 | 20.82359161 |
| O  | 17.93478762 | 27.35190816 | 22.87098926 |
| Zn | 19.31312156 | 26.16142605 | 23.49957202 |
| O  | 19.62064891 | 26.30949020 | 25.38416084 |
| Zn | 8.46675824  | 29.02936299 | 23.84540621 |
| O  | 7.94178844  | 29.18442599 | 25.65006305 |
| Zn | 9.66713139  | 29.72281721 | 21.15572352 |
| O  | 9.76675769  | 30.07679595 | 22.99115074 |
| Zn | 11.44235705 | 29.33082778 | 23.70040768 |
| O  | 11.62218047 | 29.16077561 | 25.60882237 |
| Zn | 12.98820000 | 29.74263398 | 21.08160199 |
| O  | 13.03114399 | 30.11580340 | 22.90233111 |
| Zn | 14.64794235 | 29.39033040 | 23.62038786 |
| O  | 14.80646585 | 29.26471146 | 25.63666548 |
| Zn | 16.31180111 | 29.77996775 | 20.97438824 |
| O  | 16.26083966 | 30.18027388 | 22.80517051 |
| Zn | 17.56140113 | 29.20491924 | 23.70319328 |
| O  | 17.91482893 | 29.19844515 | 25.54408137 |
| Zn | 8.40709480  | 15.98747937 | 26.81182199 |
| O  | 8.45002517  | 15.36293838 | 28.55566650 |
| Zn | 10.00112695 | 15.87444918 | 29.19448624 |
| Zn | 11.34961716 | 15.70021888 | 25.89233232 |
| O  | 11.59432359 | 16.62537904 | 29.68877175 |
| Zn | 13.31934440 | 16.60076560 | 28.92508220 |
| Zn | 14.64577731 | 15.58838750 | 26.19989912 |
| O  | 14.60110126 | 15.44796576 | 28.26937698 |
| Zn | 16.35484972 | 15.63960908 | 28.53332151 |
| Zn | 17.83081319 | 15.78879353 | 26.22308475 |
| O  | 18.12874064 | 15.74368369 | 28.19547577 |
| Zn | 6.44946108  | 18.60871905 | 26.40815473 |
| O  | 5.06941013  | 17.98714826 | 27.44449211 |
| Zn | 9.65570287  | 18.70868219 | 26.21134446 |
| O  | 9.59252184  | 18.79596269 | 28.20581919 |
| Zn | 11.28819966 | 18.35260150 | 28.71443858 |
| Zn | 13.10441244 | 18.55838614 | 26.14672447 |
| O  | 13.17010560 | 18.51701747 | 28.24097543 |

|    |             |             |             |
|----|-------------|-------------|-------------|
| Zn | 16.37869480 | 18.54958767 | 26.19880081 |
| O  | 16.73036939 | 18.51981914 | 28.19117237 |
| Zn | 18.44623080 | 17.65101220 | 28.38097638 |
| Zn | 19.60787563 | 18.71367186 | 26.02551099 |
| O  | 20.09730403 | 18.43484086 | 27.91146202 |
| Zn | 4.00637007  | 22.19730923 | 26.68094851 |
| O  | 3.18457327  | 20.99507258 | 27.68017908 |
| Zn | 4.09717012  | 19.46072122 | 27.60088114 |
| Zn | 7.97575329  | 21.50458159 | 26.26874826 |
| O  | 8.09649694  | 21.58688320 | 28.27160708 |
| Zn | 9.71594765  | 20.73012884 | 28.49799187 |
| Zn | 11.41300333 | 21.55533723 | 26.24789953 |
| O  | 11.56171758 | 21.20369770 | 28.21921491 |
| Zn | 13.28536751 | 20.49823782 | 28.39162362 |
| Zn | 14.83283193 | 21.46701770 | 25.95820844 |
| O  | 14.99313802 | 21.38931663 | 28.22556083 |
| Zn | 16.69246198 | 20.43274323 | 28.39392522 |
| Zn | 18.14526259 | 21.59176369 | 26.16240461 |
| O  | 18.37479241 | 21.33961219 | 28.16150213 |
| Zn | 19.97335790 | 20.26054856 | 28.35586815 |
| Zn | 21.25750081 | 21.71705896 | 26.17237708 |
| O  | 21.44801755 | 21.50291948 | 28.14416342 |
| Zn | 6.29785821  | 24.39183639 | 26.36303943 |
| O  | 6.24631511  | 24.36306244 | 28.39627417 |
| Zn | 7.95030826  | 23.41979122 | 28.57924156 |
| Zn | 9.70220902  | 24.41772583 | 26.31209997 |
| O  | 9.44529337  | 24.57014897 | 28.27067562 |
| Zn | 13.04598248 | 24.38622270 | 26.22520628 |
| O  | 13.44217167 | 24.46496044 | 28.19329791 |
| Zn | 14.90406621 | 23.31395562 | 28.36317443 |
| Zn | 16.49202635 | 24.41213827 | 26.08834977 |
| O  | 16.56872350 | 24.39143389 | 28.17810796 |
| Zn | 19.83622114 | 24.56551283 | 26.10780845 |
| O  | 19.92128874 | 24.69660295 | 28.17411915 |
| Zn | 20.60705451 | 23.07466676 | 28.46705564 |
| Zn | 6.87904792  | 26.04921170 | 28.54059107 |
| Zn | 8.01234034  | 27.36408330 | 26.34780865 |
| O  | 8.02426271  | 27.43531213 | 28.38107938 |
| Zn | 9.70174588  | 26.44301142 | 28.55907650 |
| Zn | 11.35988485 | 27.37625363 | 26.22673055 |
| O  | 11.35237845 | 27.24339072 | 28.23328262 |
| Zn | 12.92723701 | 26.30848933 | 28.45150754 |
| Zn | 14.64091716 | 27.32408805 | 26.13151661 |
| O  | 14.54342787 | 27.36340144 | 28.13064667 |
| Zn | 15.75659526 | 26.09792858 | 28.64220055 |
| Zn | 18.09699241 | 27.35044519 | 25.76958464 |
| O  | 17.39956539 | 26.71204247 | 29.62523989 |

|    |             |             |             |
|----|-------------|-------------|-------------|
| Zn | 18.29788048 | 25.24861693 | 28.85206598 |
| Zn | 8.77948590  | 30.44697167 | 26.63575676 |
| O  | 9.42412015  | 31.76675122 | 27.61549272 |
| Zn | 11.20856102 | 31.74246127 | 27.52007456 |
| Zn | 13.13525920 | 30.14181754 | 26.32526096 |
| O  | 12.97092218 | 31.64767578 | 27.36019903 |
| Zn | 16.39347703 | 29.76331408 | 26.68789612 |
| O  | 16.96155991 | 30.05181514 | 28.42784311 |
| Zn | 17.25771269 | 28.45893142 | 29.09705580 |

**WZ-243**

|    |             |             |            |
|----|-------------|-------------|------------|
| O  | 8.12411777  | 15.97929701 | 6.92896946 |
| Zn | 9.63851163  | 15.33543489 | 7.72017664 |
| O  | 9.73143217  | 14.81034477 | 9.56457605 |
| O  | 11.36577198 | 15.87595756 | 7.14899354 |
| Zn | 12.99479040 | 15.25193370 | 7.85557184 |
| O  | 12.99447221 | 14.79165820 | 9.71068832 |
| O  | 14.62284974 | 15.87541883 | 7.14658734 |
| Zn | 16.35018749 | 15.33444431 | 7.71641728 |
| O  | 16.25684128 | 14.80851528 | 9.56070027 |
| O  | 17.86624743 | 15.97733819 | 6.92776527 |
| O  | 6.44083629  | 18.72860063 | 8.05723637 |
| Zn | 7.99829060  | 17.70942373 | 7.62779013 |
| O  | 8.16041758  | 17.59822772 | 9.79328279 |
| O  | 9.67670760  | 18.70642206 | 7.40163513 |
| Zn | 11.34742781 | 17.78811403 | 7.62119492 |
| O  | 11.36422170 | 17.63954281 | 9.79319747 |
| O  | 12.99547873 | 18.73486181 | 7.36524250 |
| Zn | 14.64342958 | 17.78758667 | 7.62007760 |
| O  | 14.62669519 | 17.63847780 | 9.79122388 |
| O  | 16.31496630 | 18.70448280 | 7.40014512 |
| Zn | 17.99325285 | 17.70726414 | 7.62731652 |
| O  | 17.83049117 | 17.59578208 | 9.79202510 |
| O  | 19.55168865 | 18.72479139 | 8.05766951 |
| O  | 4.90408128  | 21.56163635 | 6.92695761 |
| Zn | 6.33874791  | 20.58700882 | 7.62697199 |
| O  | 6.32352924  | 20.78377929 | 9.79155507 |
| O  | 8.04127534  | 21.54236901 | 7.39937920 |
| Zn | 9.67829450  | 20.59711512 | 7.70224361 |
| O  | 9.67021045  | 20.59246599 | 9.86617215 |
| O  | 11.33736055 | 21.55456516 | 7.45747354 |
| Zn | 12.99659512 | 20.61901526 | 7.72850900 |
| O  | 12.99657323 | 20.57250859 | 9.88336301 |
| O  | 14.65664350 | 21.55316692 | 7.45760366 |
| Zn | 16.31524256 | 20.59489533 | 7.70245444 |
| O  | 16.32287598 | 20.59005788 | 9.86646556 |



|    |             |             |             |
|----|-------------|-------------|-------------|
| O  | 17.95348145 | 21.53879881 | 7.40196000  |
| Zn | 19.65593935 | 20.58313999 | 7.62828292  |
| O  | 19.67085951 | 20.77938299 | 9.79379467  |
| O  | 21.09151164 | 21.55679912 | 6.92921171  |
| Zn | 5.10607155  | 23.19635516 | 7.71459892  |
| O  | 4.69703711  | 23.54036242 | 9.55895109  |
| O  | 6.43793030  | 24.42225949 | 7.14516965  |
| Zn | 8.08358536  | 23.44845569 | 7.61934746  |
| O  | 7.96237288  | 23.53726071 | 9.79022360  |
| O  | 9.72761886  | 24.40243346 | 7.36413618  |
| Zn | 11.35848819 | 23.45927320 | 7.72845515  |
| O  | 11.31804780 | 23.48199391 | 9.88316600  |
| O  | 12.99827845 | 24.42868850 | 7.45758280  |
| Zn | 14.63724895 | 23.45789810 | 7.72858281  |
| O  | 14.67711688 | 23.48089217 | 9.88334170  |
| O  | 16.26924530 | 24.39926891 | 7.36460121  |
| Zn | 17.91289309 | 23.44496526 | 7.62098997  |
| O  | 18.03307023 | 23.53379748 | 9.79290001  |
| O  | 19.55976542 | 24.41677703 | 7.14843157  |
| Zn | 20.89111012 | 23.19059226 | 7.71930730  |
| O  | 21.29927463 | 23.53417125 | 9.56382669  |
| Zn | 6.71245269  | 26.14435286 | 7.85312675  |
| O  | 6.31314634  | 26.37431781 | 9.70834016  |
| O  | 8.06729968  | 27.24362851 | 7.14746800  |
| Zn | 9.73208969  | 26.30299805 | 7.62053076  |
| O  | 9.59418726  | 26.36202180 | 9.79244030  |
| O  | 11.36247966 | 27.29136159 | 7.40179606  |
| Zn | 12.99878179 | 26.34414530 | 7.70251092  |
| O  | 12.99862029 | 26.35266204 | 9.86651369  |
| O  | 14.63574962 | 27.28977734 | 7.40042175  |
| Zn | 16.26534189 | 26.30005472 | 7.61977193  |
| O  | 16.40300924 | 26.35965345 | 9.79086749  |
| O  | 17.93135373 | 27.23876060 | 7.14578382  |
| Zn | 19.28520367 | 26.13998421 | 7.85392012  |
| O  | 19.68423782 | 26.36973018 | 9.70927598  |
| Zn | 8.46271416  | 29.00964394 | 7.71918770  |
| O  | 7.96079896  | 29.19078862 | 9.56357198  |
| O  | 9.77760157  | 30.00011234 | 6.92937732  |
| Zn | 11.33844826 | 29.24338388 | 7.62858421  |
| O  | 11.16062939 | 29.15732584 | 9.79380845  |
| O  | 12.99956352 | 30.08267739 | 8.05849683  |
| Zn | 14.65995387 | 29.24180181 | 7.62815442  |
| O  | 14.83761931 | 29.15558769 | 9.79266487  |
| O  | 16.22133046 | 29.99750227 | 6.92856962  |
| Zn | 17.53616118 | 29.00509600 | 7.71589137  |
| O  | 18.03838130 | 29.18660659 | 9.56034701  |
| Zn | 8.43542703  | 15.82104288 | 10.47641290 |

|    |             |             |             |
|----|-------------|-------------|-------------|
| O  | 8.03133163  | 15.77407116 | 12.32497814 |
| Zn | 9.62552352  | 15.19877875 | 13.14329511 |
| O  | 9.68178589  | 14.86560265 | 15.00573416 |
| Zn | 11.37298158 | 15.67241710 | 10.26781185 |
| O  | 11.32083640 | 15.76224623 | 12.32490750 |
| Zn | 12.99569708 | 15.18737412 | 13.09536398 |
| O  | 12.99533104 | 14.86757949 | 14.96398297 |
| Zn | 14.61683655 | 15.67166202 | 10.26663349 |
| O  | 14.66987847 | 15.76110637 | 12.32325597 |
| Zn | 16.36591638 | 15.19499095 | 13.13916306 |
| O  | 16.30920695 | 14.85851832 | 15.00009750 |
| Zn | 17.55448725 | 15.81748594 | 10.47175636 |
| O  | 17.95969911 | 15.76901430 | 12.31967118 |
| Zn | 6.61684953  | 18.83047417 | 10.03953087 |
| O  | 6.42125889  | 18.71814410 | 11.97586665 |
| Zn | 7.86790076  | 17.70494075 | 12.74201645 |
| O  | 7.97675473  | 17.72512344 | 14.85020680 |
| Zn | 9.76408652  | 18.67373501 | 10.28881244 |
| O  | 9.66057078  | 18.65471942 | 12.38024196 |
| Zn | 11.31560285 | 17.75241524 | 12.91205845 |
| O  | 11.33116410 | 17.68355899 | 14.98558305 |
| Zn | 12.99608750 | 18.63480109 | 10.28157797 |
| O  | 12.99653495 | 18.65428349 | 12.39953129 |
| Zn | 14.67586351 | 17.75009422 | 12.91422766 |
| O  | 14.65982221 | 17.67920271 | 14.98800219 |
| Zn | 16.22705449 | 18.67129331 | 10.28862506 |
| O  | 16.33049644 | 18.65114305 | 12.37916978 |
| Zn | 18.12242868 | 17.69913686 | 12.73999387 |
| O  | 18.01115547 | 17.71564246 | 14.84646459 |
| Zn | 19.37531766 | 18.82634617 | 10.03993852 |
| O  | 19.57004133 | 18.71299569 | 11.97626891 |
| Zn | 4.92160821  | 21.91269506 | 10.47086824 |
| O  | 4.67721049  | 21.58539342 | 12.31867371 |
| Zn | 6.26680183  | 20.47866614 | 12.73940653 |
| O  | 6.33650637  | 20.56695705 | 14.84615307 |
| Zn | 8.05650467  | 21.63511357 | 10.28835468 |
| O  | 7.98725351  | 21.55473952 | 12.37870620 |
| Zn | 9.64098477  | 20.57654580 | 12.87861915 |
| O  | 9.66174795  | 20.59033466 | 14.98898291 |
| Zn | 11.34074121 | 21.55617646 | 10.33032994 |
| O  | 11.32686182 | 21.54806166 | 12.43646984 |
| Zn | 12.99632981 | 20.58831908 | 12.92529120 |
| O  | 12.99588906 | 20.57837250 | 15.02841595 |
| Zn | 14.65304832 | 21.55509686 | 10.33037667 |
| O  | 14.66652952 | 21.54692290 | 12.43655552 |
| Zn | 16.35073205 | 20.57247906 | 12.87854405 |
| O  | 16.32842773 | 20.58400899 | 14.98899753 |

|    |             |             |             |
|----|-------------|-------------|-------------|
| Zn | 17.93758039 | 21.63104963 | 10.28863751 |
| O  | 18.00536345 | 21.55033650 | 12.38013403 |
| Zn | 19.72422298 | 20.47261027 | 12.74167688 |
| O  | 19.65224722 | 20.55720822 | 14.84999792 |
| Zn | 21.07231704 | 21.90696771 | 10.47634232 |
| O  | 21.31443926 | 21.58007006 | 12.32491291 |
| Zn | 4.97689574  | 23.25226751 | 13.13906152 |
| O  | 4.71353311  | 23.46902126 | 14.99999044 |
| Zn | 6.26418196  | 24.52972501 | 10.26511096 |
| O  | 6.31470878  | 24.43801318 | 12.32219489 |
| Zn | 8.03391348  | 23.43807819 | 12.91413620 |
| O  | 7.98071879  | 23.48749549 | 14.98778055 |
| Zn | 9.64022388  | 24.45128412 | 10.28165134 |
| O  | 9.65660319  | 24.44063947 | 12.39929088 |
| Zn | 11.33161760 | 23.47379159 | 12.92510643 |
| O  | 11.32306216 | 23.47919006 | 15.02828078 |
| Zn | 12.99784388 | 24.42394072 | 10.33037648 |
| O  | 12.99767601 | 24.43968205 | 12.43653350 |
| Zn | 14.66306041 | 23.47264280 | 12.92508029 |
| O  | 14.67171171 | 23.47748420 | 15.02830413 |
| Zn | 16.35535527 | 24.44943560 | 10.28181556 |
| O  | 16.33795647 | 24.43987028 | 12.39951190 |
| Zn | 17.95946496 | 23.43473842 | 12.91187438 |
| O  | 18.01076805 | 23.48302316 | 14.98532953 |
| Zn | 19.73209819 | 24.52539330 | 10.26686507 |
| O  | 19.68023942 | 24.43461374 | 12.32435839 |
| Zn | 21.01548039 | 23.24825402 | 13.14347771 |
| O  | 21.27590834 | 23.46330696 | 15.00592994 |
| Zn | 6.65529174  | 26.17435592 | 13.09486756 |
| O  | 6.37828032  | 26.33446528 | 14.96351140 |
| Zn | 7.88621431  | 27.33804623 | 10.26660968 |
| O  | 7.98999677  | 27.33788681 | 12.32408438 |
| Zn | 9.71607074  | 26.34738228 | 12.91181542 |
| O  | 9.64849341  | 26.36820350 | 14.98536572 |
| Zn | 11.28974614 | 27.23040412 | 10.28856239 |
| O  | 11.32506647 | 27.32951004 | 12.38015484 |
| Zn | 12.99931524 | 26.38553674 | 12.87803685 |
| O  | 13.00046062 | 26.36063347 | 14.98883446 |
| Zn | 14.70835986 | 27.22887153 | 10.28840514 |
| O  | 14.67343646 | 27.32875449 | 12.37909976 |
| Zn | 16.28114844 | 26.34642922 | 12.91402629 |
| O  | 16.35022067 | 26.36805806 | 14.98782710 |
| Zn | 18.11120699 | 27.33460704 | 10.26583196 |
| O  | 18.00668167 | 27.33578860 | 12.32285498 |
| Zn | 19.34016083 | 26.17227308 | 13.09500381 |
| O  | 19.61709915 | 26.33200239 | 14.96374972 |
| Zn | 8.34982435  | 29.08747008 | 13.14315424 |

|    |             |             |             |
|----|-------------|-------------|-------------|
| O  | 8.03300797  | 29.20548222 | 15.00558841 |
| Zn | 9.48359296  | 29.80746038 | 10.47627626 |
| O  | 9.64480522  | 30.18082301 | 12.32485012 |
| Zn | 11.39858489 | 29.35684528 | 12.74195171 |
| O  | 11.36164919 | 29.25251366 | 14.85022183 |
| Zn | 12.99946279 | 29.87835067 | 10.04066401 |
| O  | 12.99979172 | 30.10330907 | 11.97689985 |
| Zn | 14.60202286 | 29.35660440 | 12.73980735 |
| O  | 14.64272118 | 29.25216248 | 14.84642320 |
| Zn | 16.51601111 | 29.80555305 | 10.47184770 |
| O  | 16.35484400 | 30.18085999 | 12.31968682 |
| Zn | 17.64861158 | 29.08739260 | 13.13927178 |
| O  | 17.96792394 | 29.20686505 | 15.00032852 |
| Zn | 8.31409883  | 15.98499046 | 15.68014964 |
| O  | 8.00089244  | 15.84236446 | 17.55404734 |
| Zn | 9.59872084  | 15.20227226 | 18.30915362 |
| O  | 9.66396274  | 14.86365206 | 20.18130330 |
| Zn | 11.36670895 | 15.69081348 | 15.56269263 |
| O  | 11.33766725 | 15.80260642 | 17.60876636 |
| Zn | 12.99965923 | 15.20219543 | 18.38140257 |
| O  | 12.99554955 | 14.88403131 | 20.25434570 |
| Zn | 14.62747714 | 15.68347732 | 15.56405306 |
| O  | 14.66483562 | 15.79258159 | 17.60962258 |
| Zn | 16.40534480 | 15.19714344 | 18.32176917 |
| O  | 16.33423832 | 14.85391624 | 20.19019501 |
| Zn | 17.67517455 | 15.97618967 | 15.68046860 |
| O  | 17.99585567 | 15.83291354 | 17.55101975 |
| Zn | 6.66438604  | 18.86428268 | 15.68808321 |
| O  | 6.37739173  | 18.69796938 | 17.55040205 |
| Zn | 7.88732931  | 17.69227423 | 18.16920168 |
| O  | 7.98326610  | 17.72136060 | 20.22246396 |
| Zn | 9.70359788  | 18.67492065 | 15.49092935 |
| O  | 9.64122309  | 18.65863447 | 17.57938821 |
| Zn | 11.30163930 | 17.77480579 | 18.16170158 |
| O  | 11.31553704 | 17.70008627 | 20.24251952 |
| Zn | 12.99630727 | 18.63836551 | 15.51978049 |
| O  | 12.99748276 | 18.66405159 | 17.62120662 |
| Zn | 14.69263633 | 17.76714470 | 18.15513740 |
| O  | 14.67268347 | 17.68676186 | 20.22996179 |
| Zn | 16.28927206 | 18.66842764 | 15.49304598 |
| O  | 16.35689462 | 18.64999388 | 17.58164324 |
| Zn | 18.10734063 | 17.67545499 | 18.18603190 |
| O  | 18.00545474 | 17.69088372 | 20.24485540 |
| Zn | 19.32206252 | 18.85120887 | 15.68787292 |
| O  | 19.60908710 | 18.68499110 | 17.55020366 |
| Zn | 4.99833633  | 21.72739292 | 15.68088646 |
| O  | 4.71418862  | 21.52098797 | 17.55137880 |

|    |             |             |             |
|----|-------------|-------------|-------------|
| Zn | 6.25391229  | 20.50300876 | 18.18681200 |
| O  | 6.31838582  | 20.58366888 | 20.24563006 |
| Zn | 8.02232603  | 21.58197301 | 15.49340454 |
| O  | 7.97314182  | 21.53166830 | 17.58188808 |
| Zn | 9.62496845  | 20.56987735 | 18.12403380 |
| O  | 9.63932651  | 20.58346475 | 20.24443688 |
| Zn | 11.33023515 | 21.55069435 | 15.53161246 |
| O  | 11.31855629 | 21.54326929 | 17.64177691 |
| Zn | 12.99620153 | 20.59133753 | 18.14731017 |
| O  | 12.99625633 | 20.57372667 | 20.26533231 |
| Zn | 14.66250299 | 21.54890185 | 15.53150170 |
| O  | 14.67437350 | 21.54186009 | 17.64174559 |
| Zn | 16.36379385 | 20.56121573 | 18.12366538 |
| O  | 16.34537384 | 20.56757431 | 20.24408764 |
| Zn | 17.96642354 | 21.57796692 | 15.49088346 |
| O  | 18.01106615 | 21.53119265 | 17.57925843 |
| Zn | 19.72494285 | 20.49551713 | 18.16898165 |
| O  | 19.65163665 | 20.56407400 | 20.22197927 |
| Zn | 20.99059870 | 21.71908919 | 15.68034711 |
| O  | 21.27043486 | 21.51888882 | 17.55421400 |
| Zn | 4.95873201  | 23.21631549 | 18.32216641 |
| O  | 4.69709267  | 23.44891516 | 20.19069954 |
| Zn | 6.26865550  | 24.51325098 | 15.56406915 |
| O  | 6.34449425  | 24.42574581 | 17.60972781 |
| Zn | 8.04056293  | 23.41416663 | 18.15563722 |
| O  | 7.98108881  | 23.47217628 | 20.23018003 |
| Zn | 9.64286290  | 24.44893831 | 15.51995342 |
| O  | 9.66468321  | 24.43431729 | 17.62134165 |
| Zn | 11.33453952 | 23.47177139 | 18.14730957 |
| O  | 11.31934513 | 23.48064806 | 20.26531488 |
| Zn | 12.99788119 | 24.43547208 | 15.53135679 |
| O  | 12.99766347 | 24.44892563 | 17.64162194 |
| Zn | 14.65979444 | 23.47069858 | 18.14716193 |
| O  | 14.67495402 | 23.47950355 | 20.26532668 |
| Zn | 16.35146629 | 24.44793474 | 15.51978938 |
| O  | 16.32836797 | 24.43553114 | 17.62124322 |
| Zn | 17.94629824 | 23.41094928 | 18.16171909 |
| O  | 18.00363908 | 23.46091963 | 20.24233371 |
| Zn | 19.71860795 | 24.50992613 | 15.56242900 |
| O  | 19.63619804 | 24.42835559 | 17.60853297 |
| Zn | 21.02581724 | 23.22294964 | 18.30878201 |
| O  | 21.28602719 | 23.44812957 | 20.18113384 |
| Zn | 6.66617501  | 26.16284739 | 18.38137413 |
| O  | 6.39236010  | 26.32551995 | 20.25437409 |
| Zn | 7.90501912  | 27.33375839 | 15.56265675 |
| O  | 8.01659156  | 27.30271333 | 17.60895590 |
| Zn | 9.74270059  | 26.34764082 | 18.16166122 |

|    |             |             |             |
|----|-------------|-------------|-------------|
| O  | 9.67133011  | 26.37289667 | 20.24247913 |
| Zn | 11.32071640 | 27.28203232 | 15.49054963 |
| O  | 11.33817316 | 27.34402799 | 17.57932138 |
| Zn | 13.00178402 | 26.40234931 | 18.12314396 |
| O  | 13.00603049 | 26.38313213 | 20.24373061 |
| Zn | 14.67885614 | 27.28454730 | 15.49280943 |
| O  | 14.66056368 | 27.35224589 | 17.58167851 |
| Zn | 16.25727770 | 26.35215366 | 18.15499200 |
| O  | 16.33673777 | 26.37513648 | 20.22985922 |
| Zn | 18.09462953 | 27.33783031 | 15.56377386 |
| O  | 17.98108603 | 27.31547953 | 17.60947607 |
| Zn | 19.32482454 | 26.16797798 | 18.38052451 |
| O  | 19.60283394 | 26.32369268 | 20.25349633 |
| Zn | 8.36656035  | 29.10906424 | 18.30901487 |
| O  | 8.04078020  | 29.22133086 | 20.18120656 |
| Zn | 9.68603876  | 29.83038035 | 15.68043477 |
| O  | 9.71946241  | 30.17318043 | 17.55420698 |
| Zn | 11.37833581 | 29.34619619 | 18.16899523 |
| O  | 11.35582062 | 29.24855510 | 20.22197502 |
| Zn | 13.00413406 | 29.81993028 | 15.68802510 |
| O  | 13.00408469 | 30.15137511 | 17.55036566 |
| Zn | 14.62920836 | 29.35557321 | 18.18618647 |
| O  | 14.66673130 | 29.25976338 | 20.24499834 |
| Zn | 16.31692907 | 29.83091057 | 15.68061923 |
| O  | 16.28040310 | 30.18061088 | 17.55108615 |
| Zn | 17.62638170 | 29.12080198 | 18.32104185 |
| O  | 17.95916281 | 29.23053357 | 20.18960471 |
| Zn | 8.32484123  | 15.92691884 | 20.96300831 |
| O  | 7.98141650  | 15.79033286 | 22.82395938 |
| Zn | 9.55351932  | 15.16126725 | 23.63094908 |
| O  | 9.67903899  | 14.78487918 | 25.47582676 |
| Zn | 11.32782062 | 15.67225196 | 20.78927948 |
| O  | 11.28878557 | 15.75818494 | 22.84464695 |
| Zn | 13.00383142 | 15.13481226 | 23.49732469 |
| O  | 13.02178285 | 14.72388538 | 25.34535378 |
| Zn | 14.66814085 | 15.66375284 | 20.78729069 |
| O  | 14.71176000 | 15.74672046 | 22.83985513 |
| Zn | 16.38720247 | 15.16250365 | 23.71966504 |
| O  | 16.32806301 | 14.82526121 | 25.59305072 |
| Zn | 17.64973119 | 15.90418204 | 21.02646058 |
| O  | 17.96664264 | 15.78686704 | 22.89523553 |
| Zn | 6.65388721  | 18.85572276 | 21.04589523 |
| O  | 6.37097422  | 18.67987125 | 22.91552186 |
| Zn | 7.82002713  | 17.58784542 | 23.52591431 |
| O  | 7.96129501  | 17.54200748 | 25.62966671 |
| Zn | 9.69412127  | 18.66999223 | 20.80326850 |
| O  | 9.59953348  | 18.62824951 | 22.89603781 |

|    |             |             |             |
|----|-------------|-------------|-------------|
| Zn | 11.28790817 | 17.71870129 | 23.36151766 |
| O  | 11.30336479 | 17.69163227 | 25.44770808 |
| Zn | 13.00195033 | 18.61400358 | 20.74782749 |
| O  | 13.01077240 | 18.61810171 | 22.87085596 |
| Zn | 14.70392046 | 17.68547072 | 23.40593065 |
| O  | 14.67623259 | 17.56576489 | 25.53707991 |
| Zn | 16.29009485 | 18.65115975 | 20.80250017 |
| O  | 16.36906099 | 18.60774834 | 22.89221020 |
| Zn | 18.15679550 | 17.61790317 | 23.51211402 |
| O  | 18.09540480 | 17.63434022 | 25.59668849 |
| Zn | 19.33423748 | 18.84547442 | 21.04504526 |
| O  | 19.62806713 | 18.68799481 | 22.91458182 |
| Zn | 4.94898036  | 21.78485749 | 21.02759691 |
| O  | 4.68928545  | 21.56938015 | 22.89643340 |
| Zn | 6.18008131  | 20.48907769 | 23.51302727 |
| O  | 6.22472449  | 20.53420398 | 25.59782843 |
| Zn | 8.00756198  | 21.58969662 | 20.80366879 |
| O  | 7.93078518  | 21.54251031 | 22.89304559 |
| Zn | 9.58183672  | 20.55775768 | 23.32758458 |
| O  | 9.57148190  | 20.58823078 | 25.48167153 |
| Zn | 11.31705021 | 21.54193043 | 20.73349725 |
| O  | 11.29987715 | 21.52732013 | 22.86906967 |
| Zn | 13.00050300 | 20.56693184 | 23.26882684 |
| O  | 13.00096317 | 20.56570897 | 25.42851070 |
| Zn | 14.67635410 | 21.54108104 | 20.73332303 |
| O  | 14.69781702 | 21.53343073 | 22.86895186 |
| Zn | 16.39630439 | 20.52965483 | 23.32720766 |
| O  | 16.37544007 | 20.50581121 | 25.48133997 |
| Zn | 17.97503383 | 21.57185253 | 20.80315856 |
| O  | 18.05841200 | 21.51018503 | 22.89576224 |
| Zn | 19.84892879 | 20.48883154 | 23.52531664 |
| O  | 19.81834057 | 20.63449758 | 25.62863755 |
| Zn | 21.03522886 | 21.75642201 | 20.96243116 |
| O  | 21.32488092 | 21.52777702 | 22.82354611 |
| Zn | 4.93793686  | 23.24992581 | 23.72023092 |
| O  | 4.67499944  | 23.47003793 | 25.59347384 |
| Zn | 6.23136028  | 24.48721150 | 20.78762803 |
| O  | 6.28152608  | 24.40852909 | 22.84019389 |
| Zn | 7.96418353  | 23.44551424 | 23.40791306 |
| O  | 7.87505962  | 23.52992161 | 25.53730998 |
| Zn | 9.61943004  | 24.45550230 | 20.74822234 |
| O  | 9.61835458  | 24.44580735 | 22.87095346 |
| Zn | 11.31131996 | 23.48041044 | 23.26890254 |
| O  | 11.31037021 | 23.48066129 | 25.42874594 |
| Zn | 12.99721479 | 24.45112612 | 20.73349198 |
| O  | 12.99319961 | 24.47333843 | 22.86902940 |
| Zn | 14.67864541 | 23.48644044 | 23.26853645 |

|    |             |             |             |
|----|-------------|-------------|-------------|
| O  | 14.67999986 | 23.48717046 | 25.42846055 |
| Zn | 16.36895673 | 24.46468153 | 20.74786114 |
| O  | 16.36146869 | 24.46972816 | 22.87081025 |
| Zn | 18.00186623 | 23.42706257 | 23.36139627 |
| O  | 18.01816742 | 23.45446609 | 25.44742870 |
| Zn | 19.75379796 | 24.48516201 | 20.78833543 |
| O  | 19.69891854 | 24.40863081 | 22.84369267 |
| Zn | 21.08351168 | 23.20440176 | 23.62916532 |
| O  | 21.34777517 | 23.50154397 | 25.47407280 |
| Zn | 6.60541082  | 26.19377087 | 23.49732462 |
| O  | 6.24077230  | 26.38477456 | 25.34527428 |
| Zn | 7.90878240  | 27.37592425 | 20.78838789 |
| O  | 8.00299056  | 27.36685080 | 22.84405282 |
| Zn | 9.70158436  | 26.38761996 | 23.35991103 |
| O  | 9.67027371  | 26.38801843 | 25.44661050 |
| Zn | 11.32192342 | 27.29273903 | 20.80254481 |
| O  | 11.33321653 | 27.39560815 | 22.89543820 |
| Zn | 13.01298318 | 26.44618836 | 23.32711793 |
| O  | 13.04475303 | 26.43938951 | 25.48158602 |
| Zn | 14.69285575 | 27.29385830 | 20.80218941 |
| O  | 14.69099170 | 27.38384962 | 22.89195002 |
| Zn | 16.32230940 | 26.40273991 | 23.40436688 |
| O  | 16.44063544 | 26.43806665 | 25.53614146 |
| Zn | 18.09145927 | 27.38258378 | 20.78593357 |
| O  | 17.99752519 | 27.37888047 | 22.83876120 |
| Zn | 19.38143261 | 26.20561294 | 23.49606778 |
| O  | 19.72811871 | 26.42671521 | 25.34404967 |
| Zn | 8.35330675  | 29.16859826 | 23.62912619 |
| O  | 7.96475988  | 29.24777985 | 25.47401595 |
| Zn | 9.63119693  | 29.84996452 | 20.96261765 |
| O  | 9.68454357  | 30.21620186 | 22.82327547 |
| Zn | 11.32190165 | 29.45703675 | 23.52525300 |
| O  | 11.21113456 | 29.35687091 | 25.62870179 |
| Zn | 13.00259235 | 29.83386348 | 21.04520526 |
| O  | 12.99196267 | 30.16659149 | 22.91481093 |
| Zn | 14.65443217 | 29.42736975 | 23.51158333 |
| O  | 14.67015858 | 29.36506830 | 25.59604853 |
| Zn | 16.39209051 | 29.84481147 | 21.02618188 |
| O  | 16.33546748 | 30.17786379 | 22.89509277 |
| Zn | 17.66601152 | 29.12169519 | 23.71883659 |
| O  | 17.98684605 | 29.23858181 | 25.59261920 |
| Zn | 8.54985221  | 15.79358112 | 26.57188149 |
| O  | 8.47561300  | 15.79510334 | 28.50202784 |
| Zn | 10.14730333 | 15.04758506 | 29.21721771 |
| Zn | 11.41282228 | 15.51409052 | 25.97961506 |
| O  | 11.43690419 | 15.95050982 | 27.89321201 |
| Zn | 12.64698368 | 14.93787608 | 29.15245163 |



|    |             |             |             |
|----|-------------|-------------|-------------|
| Zn | 14.57537282 | 15.43105902 | 26.18008575 |
| O  | 14.41760761 | 15.58783203 | 28.35433247 |
| Zn | 16.20718006 | 15.08995427 | 28.92649251 |
| Zn | 17.68995079 | 15.83970893 | 26.41749055 |
| O  | 17.86909674 | 15.79203849 | 28.35347731 |
| Zn | 6.63818869  | 18.78402742 | 26.34289134 |
| O  | 6.53217262  | 18.71440790 | 28.29270421 |
| Zn | 8.02909738  | 17.62339848 | 28.64272480 |
| Zn | 9.62898587  | 18.63452102 | 25.86005028 |
| O  | 9.64152181  | 18.74959649 | 28.09590825 |
| Zn | 11.31048729 | 17.81928056 | 28.05403062 |
| Zn | 13.02095446 | 18.58880885 | 25.78207364 |
| O  | 13.03455495 | 18.69722880 | 28.01034123 |
| Zn | 14.59758389 | 17.55551539 | 28.23448072 |
| Zn | 16.32811010 | 18.55051648 | 25.94221434 |
| O  | 16.27055554 | 18.56508109 | 28.14872712 |
| Zn | 18.03661839 | 17.67728141 | 28.63900891 |
| Zn | 19.40458957 | 18.86708688 | 26.34130465 |
| O  | 19.51905024 | 18.81029442 | 28.29103328 |
| Zn | 4.87353460  | 21.78286580 | 26.41746025 |
| O  | 4.74228659  | 21.65209241 | 28.35354558 |
| Zn | 6.29159960  | 20.56483859 | 28.63968344 |
| Zn | 7.90222604  | 21.60697998 | 25.94272301 |
| O  | 7.94306705  | 21.65097112 | 28.14881647 |
| Zn | 9.59250304  | 20.66253335 | 28.19914114 |
| Zn | 11.29548486 | 21.52303901 | 25.74319706 |
| O  | 11.32692736 | 21.53532636 | 27.98988191 |
| Zn | 13.00966914 | 20.60141914 | 28.09334592 |
| Zn | 14.70391000 | 21.53124198 | 25.74287082 |
| O  | 14.67799042 | 21.55277936 | 27.98946846 |
| Zn | 16.30149874 | 20.48775498 | 28.19832645 |
| Zn | 18.03862927 | 21.53269458 | 25.85925949 |
| O  | 17.93382526 | 21.48633876 | 28.09497722 |
| Zn | 19.71540352 | 20.65208546 | 28.64082321 |
| Zn | 21.03954277 | 22.01848279 | 26.56941629 |
| O  | 21.07481707 | 21.95367895 | 28.49964641 |
| Zn | 4.96550231  | 23.44231506 | 28.92649264 |
| Zn | 6.07341281  | 24.68694088 | 26.18122680 |
| O  | 6.29061329  | 24.74480593 | 28.35350498 |
| Zn | 7.90443286  | 23.60472494 | 28.23288318 |
| Zn | 9.58860086  | 24.45214528 | 25.78231143 |
| O  | 9.67569105  | 24.38670599 | 28.01077349 |
| Zn | 11.33703741 | 23.45570662 | 28.09346852 |
| Zn | 12.99228504 | 24.47904421 | 25.74330699 |
| O  | 12.98717456 | 24.44668056 | 27.98984132 |
| Zn | 14.64493985 | 23.47691382 | 28.09288263 |
| Zn | 16.38182087 | 24.49304047 | 25.78161254 |

|    |             |             |             |
|----|-------------|-------------|-------------|
| O  | 16.28188384 | 24.45057682 | 28.00993622 |
| Zn | 17.90462683 | 23.39698717 | 28.05285031 |
| Zn | 19.84994618 | 24.63838640 | 25.97813934 |
| O  | 19.45948296 | 24.44171233 | 27.89184359 |
| Zn | 20.88578723 | 23.77502102 | 29.21502107 |
| Zn | 6.61174314  | 26.60537705 | 29.14874942 |
| Zn | 7.73182087  | 27.38110140 | 25.97844089 |
| O  | 8.09718671  | 27.14341795 | 27.89266286 |
| Zn | 9.77825187  | 26.31833683 | 28.05560766 |
| Zn | 11.32389344 | 27.36642102 | 25.86000487 |
| O  | 11.41754633 | 27.29993996 | 28.09606723 |
| Zn | 13.09817465 | 26.38498144 | 28.19907116 |
| Zn | 14.76175872 | 27.37628404 | 25.94188948 |
| O  | 14.77875012 | 27.32022625 | 28.14878085 |
| Zn | 16.48834724 | 26.37452396 | 28.23665369 |
| Zn | 18.33662064 | 27.41633633 | 26.17777036 |
| O  | 18.28234753 | 27.20344383 | 28.35458275 |
| Zn | 19.73013530 | 25.99422496 | 29.15356101 |
| Zn | 7.95642603  | 28.71523732 | 29.21294663 |
| Zn | 9.40253853  | 29.72210637 | 26.56959408 |
| O  | 9.44102994  | 29.78760338 | 28.49947363 |
| Zn | 11.24770951 | 29.26030173 | 28.64135339 |
| Zn | 12.94834929 | 29.88312894 | 26.34138792 |
| O  | 12.94112881 | 30.01088302 | 28.29100193 |
| Zn | 14.66402468 | 29.29374626 | 28.63828353 |
| Zn | 16.42673223 | 29.91293664 | 26.41433710 |
| O  | 16.37989857 | 30.09298296 | 28.35102887 |
| Zn | 17.81953452 | 29.00404032 | 28.91763380 |

**WZ-317**

|    |             |             |             |
|----|-------------|-------------|-------------|
| O  | 7.90230317  | 15.95833194 | 27.54429223 |
| Zn | 9.53730524  | 15.51076140 | 28.24867205 |
| O  | 9.68007881  | 14.99265687 | 30.12266680 |
| O  | 11.33078531 | 15.86746051 | 27.64252822 |
| Zn | 12.99740345 | 15.16856682 | 28.34158807 |
| O  | 12.99730952 | 14.97052430 | 30.24627058 |
| O  | 14.66404773 | 15.86755202 | 27.64265096 |
| Zn | 16.45745587 | 15.51085165 | 28.24868279 |
| O  | 16.31463536 | 14.99272953 | 30.12273452 |
| O  | 18.09230588 | 15.95846927 | 27.54415523 |
| O  | 5.92349777  | 18.73607462 | 28.70983122 |
| Zn | 7.13934790  | 17.39590026 | 28.30874974 |
| O  | 8.06018348  | 17.77158218 | 30.24720257 |
| Zn | 11.62296819 | 17.61345045 | 28.33737932 |
| O  | 11.32246637 | 17.81388046 | 30.29343461 |
| O  | 12.99735135 | 18.80576602 | 27.79371910 |

|    |             |             |             |
|----|-------------|-------------|-------------|
| Zn | 14.37174460 | 17.61354195 | 28.33743486 |
| O  | 14.67214515 | 17.81382572 | 30.29352492 |
| Zn | 18.85551560 | 17.39609131 | 28.30862310 |
| O  | 17.93444448 | 17.77163815 | 30.24725550 |
| O  | 20.07134982 | 18.73610463 | 28.70992104 |
| O  | 6.11140429  | 22.39351085 | 27.30090763 |
| Zn | 6.51770280  | 20.47142366 | 28.14866643 |
| O  | 6.35012606  | 20.98123657 | 30.21301315 |
| O  | 8.29057995  | 20.80678821 | 27.35454937 |
| Zn | 9.80119152  | 20.65680821 | 28.41578620 |
| O  | 9.67303015  | 20.66265856 | 30.38667808 |
| O  | 11.36249618 | 21.59525762 | 27.84998170 |
| Zn | 12.99715924 | 20.67521605 | 28.32133964 |
| O  | 12.99727789 | 20.64681592 | 30.42972689 |
| O  | 14.63202958 | 21.59520082 | 27.85016129 |
| Zn | 16.19322928 | 20.65666905 | 28.41600238 |
| O  | 16.32152917 | 20.66252345 | 30.38682853 |
| O  | 17.70390437 | 20.80693249 | 27.35477560 |
| Zn | 19.47702029 | 20.47173683 | 28.14865221 |
| O  | 19.64458735 | 20.98129762 | 30.21295752 |
| O  | 19.88301676 | 22.39374794 | 27.30083637 |
| Zn | 5.32047232  | 23.12996830 | 28.71477176 |
| O  | 4.64705205  | 23.60560065 | 30.31948894 |
| Zn | 8.03463121  | 22.71672858 | 27.22718182 |
| O  | 7.97037477  | 23.62744707 | 30.41364309 |
| O  | 9.32458415  | 24.15045347 | 27.63967905 |
| Zn | 10.79024272 | 23.24405895 | 28.53843739 |
| O  | 11.29447612 | 23.48821296 | 30.40523087 |
| Zn | 15.20426643 | 23.24396424 | 28.53863091 |
| O  | 14.70022223 | 23.48820744 | 30.40544642 |
| O  | 16.66963854 | 24.15061785 | 27.63974364 |
| Zn | 17.95960877 | 22.71681516 | 27.22802321 |
| O  | 18.02427621 | 23.62733798 | 30.41333614 |
| Zn | 20.67413654 | 23.12984355 | 28.71479975 |
| O  | 21.34768867 | 23.60569041 | 30.31961984 |
| Zn | 8.05803136  | 25.15030458 | 29.02258708 |
| O  | 6.65971706  | 26.20843360 | 30.02934648 |
| O  | 7.93219314  | 26.58337832 | 27.42318055 |
| Zn | 9.74845913  | 26.15971275 | 27.26538697 |
| O  | 9.56169179  | 26.18622060 | 30.35330311 |
| O  | 11.41211829 | 26.99985606 | 27.33442714 |
| Zn | 12.99714005 | 26.35973528 | 28.23944453 |
| O  | 12.99731960 | 26.21699273 | 30.16893679 |
| O  | 14.58212611 | 26.99975587 | 27.33446182 |
| Zn | 16.24569356 | 26.15927696 | 27.26473176 |
| O  | 16.43289625 | 26.18620928 | 30.35347262 |
| O  | 18.06174306 | 26.58401409 | 27.42294586 |

|    |             |             |             |
|----|-------------|-------------|-------------|
| Zn | 17.93633149 | 25.15115471 | 29.02264699 |
| O  | 19.33471707 | 26.20852357 | 30.02915963 |
| Zn | 7.52269251  | 27.83737985 | 28.69435134 |
| O  | 7.78542356  | 28.95643080 | 30.13190232 |
| Zn | 11.53369691 | 28.72246108 | 28.19546554 |
| O  | 11.10307212 | 28.90636262 | 30.09432393 |
| O  | 12.99714417 | 29.91886352 | 28.37884963 |
| Zn | 14.46057099 | 28.72251176 | 28.19530691 |
| O  | 14.89136904 | 28.90642179 | 30.09411515 |
| Zn | 18.47074222 | 27.83826118 | 28.69392324 |
| O  | 18.20893498 | 28.95639446 | 30.13173593 |
| Zn | 8.38456777  | 16.00971108 | 31.02759594 |
| O  | 8.02531467  | 15.93493290 | 32.88921062 |
| Zn | 9.60962093  | 15.34648358 | 33.71817816 |
| O  | 9.69324653  | 15.00632853 | 35.57155580 |
| Zn | 11.33161100 | 15.71179865 | 30.84295885 |
| O  | 11.32403805 | 15.89381783 | 32.88520298 |
| Zn | 12.99727419 | 15.32953413 | 33.68989717 |
| O  | 12.99713179 | 15.01074330 | 35.54924137 |
| Zn | 14.66304353 | 15.71174425 | 30.84295604 |
| O  | 14.67042734 | 15.89379413 | 32.88514118 |
| Zn | 16.38481872 | 15.34644561 | 33.71822441 |
| O  | 16.30100890 | 15.00622646 | 35.57157019 |
| Zn | 17.61017329 | 16.00977840 | 31.02761859 |
| O  | 17.96912468 | 15.93491313 | 32.88933544 |
| Zn | 6.44735083  | 18.94546588 | 30.66997539 |
| O  | 6.41257982  | 18.87370473 | 32.61632800 |
| Zn | 7.82166342  | 17.81748918 | 33.39925783 |
| O  | 7.99484775  | 17.84099902 | 35.49068701 |
| Zn | 9.65644820  | 18.69899999 | 30.93045044 |
| O  | 9.66043542  | 18.75755701 | 32.95664718 |
| Zn | 11.30164712 | 17.84201237 | 33.56441031 |
| O  | 11.33514670 | 17.79940687 | 35.59791506 |
| Zn | 12.99728356 | 18.70210680 | 30.93645918 |
| O  | 12.99722034 | 18.73012179 | 32.97731330 |
| Zn | 14.69282149 | 17.84198762 | 33.56443497 |
| O  | 14.65913625 | 17.79933759 | 35.59794745 |
| Zn | 16.33810244 | 18.69895912 | 30.93057630 |
| O  | 16.33403098 | 18.75752113 | 32.95673693 |
| Zn | 18.17273540 | 17.81743804 | 33.39941372 |
| O  | 17.99941128 | 17.84081999 | 35.49082930 |
| Zn | 19.54720247 | 18.94560801 | 30.66991909 |
| O  | 19.58174868 | 18.87370207 | 32.61629279 |
| Zn | 4.99344795  | 21.90409035 | 31.21958378 |
| O  | 4.70308219  | 21.66519859 | 33.04111761 |
| Zn | 6.28354441  | 20.54692185 | 33.52152818 |
| O  | 6.37436582  | 20.67298114 | 35.56688826 |

|    |             |             |             |
|----|-------------|-------------|-------------|
| Zn | 8.03599244  | 21.70087993 | 30.95161640 |
| O  | 8.00744696  | 21.63966890 | 32.98048092 |
| Zn | 9.62674440  | 20.63157057 | 33.59362981 |
| O  | 9.67580656  | 20.68127022 | 35.63553608 |
| Zn | 11.36139417 | 21.52323481 | 31.05007843 |
| O  | 11.33412238 | 21.58843640 | 33.05261603 |
| Zn | 12.99723063 | 20.61416888 | 33.64390883 |
| O  | 12.99720274 | 20.65373592 | 35.66734563 |
| Zn | 14.63314272 | 21.52317370 | 31.05016419 |
| O  | 14.66040635 | 21.58839727 | 33.05269283 |
| Zn | 16.36781198 | 20.63158078 | 33.59363907 |
| O  | 16.31856103 | 20.68120473 | 35.63563320 |
| Zn | 17.95855363 | 21.70065638 | 30.95156791 |
| O  | 17.98713653 | 21.63970554 | 32.98051605 |
| Zn | 19.71097269 | 20.54691756 | 33.52164581 |
| O  | 19.61995581 | 20.67280080 | 35.56705236 |
| Zn | 21.00108314 | 21.90411751 | 31.21963759 |
| O  | 21.29139974 | 21.66519261 | 33.04124087 |
| Zn | 4.97022965  | 23.31296641 | 33.89952081 |
| O  | 4.75034746  | 23.55367551 | 35.73949485 |
| Zn | 6.19236543  | 24.62084792 | 31.05407173 |
| O  | 6.30934129  | 24.52278940 | 33.03707128 |
| Zn | 8.01984670  | 23.46156506 | 33.69140558 |
| O  | 7.99372109  | 23.55648683 | 35.69483453 |
| Zn | 9.66059895  | 24.38651034 | 31.18111388 |
| O  | 9.68710947  | 24.43003096 | 33.14932777 |
| Zn | 11.36645045 | 23.46445092 | 33.70564468 |
| O  | 11.34178067 | 23.52356607 | 35.71042661 |
| Zn | 12.99732243 | 24.34457232 | 30.98246805 |
| O  | 12.99728795 | 24.41322684 | 32.98567595 |
| Zn | 14.62810782 | 23.46444524 | 33.70562311 |
| O  | 14.65261948 | 23.52353682 | 35.71039401 |
| Zn | 16.33420460 | 24.38657064 | 31.18108835 |
| O  | 16.30744447 | 24.43003693 | 33.14930973 |
| Zn | 17.97473532 | 23.46156324 | 33.69144005 |
| O  | 18.00067377 | 23.55637779 | 35.69485097 |
| Zn | 19.80203032 | 24.62098611 | 31.05388227 |
| O  | 19.68512800 | 24.52286091 | 33.03688849 |
| Zn | 21.02411443 | 23.31294643 | 33.89949947 |
| O  | 21.24393538 | 23.55362721 | 35.73947334 |
| Zn | 6.66547696  | 26.18918344 | 33.95275133 |
| O  | 6.39232883  | 26.40710601 | 35.77851014 |
| Zn | 7.93046718  | 27.17082497 | 31.17098754 |
| O  | 8.02234132  | 27.29017772 | 33.09465269 |
| Zn | 9.77109224  | 26.34530344 | 33.69661767 |
| O  | 9.67824887  | 26.39555739 | 35.68673742 |
| Zn | 11.23586574 | 27.05087391 | 30.88582581 |

|    |             |             |             |
|----|-------------|-------------|-------------|
| O  | 11.34477704 | 27.22440090 | 32.88549619 |
| Zn | 12.99729074 | 26.34728262 | 33.57766358 |
| O  | 12.99723264 | 26.36416559 | 35.60573145 |
| Zn | 14.75875162 | 27.05092423 | 30.88575095 |
| O  | 14.64974025 | 27.22455176 | 32.88545288 |
| Zn | 16.22344172 | 26.34531669 | 33.69649767 |
| O  | 16.31619174 | 26.39556126 | 35.68667490 |
| Zn | 18.06432410 | 27.17086555 | 31.17082230 |
| O  | 17.97221870 | 27.29018003 | 33.09450427 |
| Zn | 19.32910372 | 26.18921875 | 33.95272954 |
| O  | 19.60212095 | 26.40709698 | 35.77849903 |
| Zn | 8.44854979  | 29.14147230 | 33.78548501 |
| O  | 8.10854073  | 29.23186226 | 35.61254202 |
| Zn | 9.43100889  | 29.54909475 | 30.84487316 |
| O  | 9.67230362  | 30.00234270 | 32.66704506 |
| Zn | 11.41513171 | 29.28659093 | 33.28539754 |
| O  | 11.36392963 | 29.22789046 | 35.38834961 |
| Zn | 12.99723107 | 29.76815849 | 30.46733365 |
| O  | 12.99728651 | 29.93538587 | 32.38553756 |
| Zn | 14.57941799 | 29.28669899 | 33.28538489 |
| O  | 14.63053761 | 29.22797260 | 35.38834678 |
| Zn | 16.56340589 | 29.54909319 | 30.84488300 |
| O  | 16.32228217 | 30.00247590 | 32.66709240 |
| Zn | 17.54602520 | 29.14140745 | 33.78535401 |
| O  | 17.88592206 | 29.23184457 | 35.61250478 |
| Zn | 8.35776313  | 16.09317329 | 36.34909608 |
| O  | 8.05483356  | 15.95795668 | 38.20982421 |
| Zn | 9.62537006  | 15.32839886 | 39.04228833 |
| O  | 9.70100254  | 14.98852269 | 40.89644104 |
| Zn | 11.36889576 | 15.78464670 | 36.21576926 |
| O  | 11.34324158 | 15.90658710 | 38.24359399 |
| Zn | 12.99701960 | 15.32373640 | 39.06763102 |
| O  | 12.99695043 | 14.98096323 | 40.91694385 |
| Zn | 14.62534903 | 15.78458713 | 36.21581207 |
| O  | 14.65083658 | 15.90652603 | 38.24363889 |
| Zn | 16.36860785 | 15.32824264 | 39.04248570 |
| O  | 16.29287023 | 14.98835916 | 40.89664086 |
| Zn | 17.63634978 | 16.09307835 | 36.34930660 |
| O  | 17.93917131 | 15.95781685 | 38.21004868 |
| Zn | 6.71174061  | 18.94824413 | 36.41212751 |
| O  | 6.42137169  | 18.79344207 | 38.25850264 |
| Zn | 7.92631308  | 17.78179505 | 38.91064247 |
| O  | 8.04560952  | 17.81255796 | 40.93286507 |
| Zn | 9.72217997  | 18.76163277 | 36.21045452 |
| O  | 9.67008717  | 18.75440447 | 38.24886322 |
| Zn | 11.31804147 | 17.86495674 | 38.89803312 |
| O  | 11.34575035 | 17.78924493 | 40.92909542 |

|    |             |             |             |
|----|-------------|-------------|-------------|
| Zn | 12.99714690 | 18.70564411 | 36.23156830 |
| O  | 12.99703664 | 18.75539763 | 38.27630664 |
| Zn | 14.67600252 | 17.86487502 | 38.89806715 |
| O  | 14.64808901 | 17.78917004 | 40.92914721 |
| Zn | 16.27207781 | 18.76155639 | 36.21055472 |
| O  | 16.32400883 | 18.75437027 | 38.24897498 |
| Zn | 18.06768058 | 17.78170816 | 38.91085371 |
| O  | 17.94824055 | 17.81236187 | 40.93309712 |
| Zn | 19.28247085 | 18.94810868 | 36.41232881 |
| O  | 19.57266566 | 18.79326726 | 38.25872348 |
| Zn | 5.04847363  | 21.82165792 | 36.46563026 |
| O  | 4.78033066  | 21.62313093 | 38.31716196 |
| Zn | 6.31422557  | 20.58091162 | 38.95803060 |
| O  | 6.40425140  | 20.67294111 | 40.97155326 |
| Zn | 8.06471824  | 21.65621188 | 36.28457344 |
| O  | 8.02866598  | 21.61087439 | 38.30294314 |
| Zn | 9.66732313  | 20.63672902 | 38.91616477 |
| O  | 9.69928889  | 20.65960278 | 40.95815274 |
| Zn | 11.34423443 | 21.59286989 | 36.29742032 |
| O  | 11.33931380 | 21.60695185 | 38.32334520 |
| Zn | 12.99704543 | 20.65480574 | 38.93917496 |
| O  | 12.99694484 | 20.64855528 | 40.97228732 |
| Zn | 14.65012392 | 21.59286995 | 36.29744169 |
| O  | 14.65480325 | 21.60692918 | 38.32337428 |
| Zn | 16.32673759 | 20.63668685 | 38.91630582 |
| O  | 16.29459276 | 20.65949188 | 40.95827045 |
| Zn | 17.92960941 | 21.65609081 | 36.28470694 |
| O  | 17.96546410 | 21.61074899 | 38.30309440 |
| Zn | 19.67986609 | 20.58077041 | 38.95814282 |
| O  | 19.58968547 | 20.67267025 | 40.97168611 |
| Zn | 20.94579768 | 21.82172072 | 36.46566921 |
| O  | 21.21374675 | 21.62299636 | 38.31724335 |
| Zn | 5.02972692  | 23.28993814 | 39.15979072 |
| O  | 4.78442381  | 23.53093137 | 41.00706597 |
| Zn | 6.29239599  | 24.57407153 | 36.38880040 |
| O  | 6.40879799  | 24.48471106 | 38.38020083 |
| Zn | 8.09878012  | 23.47013736 | 38.98215343 |
| O  | 8.04629770  | 23.53251255 | 40.99546937 |
| Zn | 9.66398502  | 24.48162298 | 36.30448672 |
| O  | 9.70333562  | 24.47648700 | 38.33087487 |
| Zn | 11.35383215 | 23.50623077 | 38.96402217 |
| O  | 11.34483214 | 23.51805948 | 40.99103509 |
| Zn | 12.99719682 | 24.46598774 | 36.32740667 |
| O  | 12.99712908 | 24.48395477 | 38.34088975 |
| Zn | 14.64040997 | 23.50620666 | 38.96403365 |
| O  | 14.64925492 | 23.51800783 | 40.99106109 |
| Zn | 16.33040642 | 24.48162770 | 36.30443085 |

|    |             |             |             |
|----|-------------|-------------|-------------|
| O  | 16.29092397 | 24.47646398 | 38.33085027 |
| Zn | 17.89544461 | 23.47004751 | 38.98216883 |
| O  | 17.94777058 | 23.53237552 | 40.99550806 |
| Zn | 19.70193364 | 24.57408411 | 36.38881598 |
| O  | 19.58547640 | 24.48460766 | 38.38023494 |
| Zn | 20.96443607 | 23.28974920 | 39.15991370 |
| O  | 21.20958853 | 23.53067058 | 41.00722783 |
| Zn | 6.74370712  | 26.22414136 | 39.17271608 |
| O  | 6.44604264  | 26.38236288 | 41.01731251 |
| Zn | 7.94840468  | 27.40606618 | 36.33319215 |
| O  | 8.07743623  | 27.35644654 | 38.33412525 |
| Zn | 9.78260314  | 26.37253803 | 38.96166370 |
| O  | 9.70109639  | 26.38712951 | 40.97814051 |
| Zn | 11.34824118 | 27.29000047 | 36.25109663 |
| O  | 11.36404619 | 27.35558081 | 38.26668024 |
| Zn | 12.99714321 | 26.40944955 | 38.94003269 |
| O  | 12.99706251 | 26.37452777 | 40.97188435 |
| Zn | 14.64619694 | 27.29004576 | 36.25103952 |
| O  | 14.63022308 | 27.35562337 | 38.26664061 |
| Zn | 16.21163406 | 26.37253644 | 38.96162152 |
| O  | 16.29301543 | 26.38708011 | 40.97813646 |
| Zn | 18.04603487 | 27.40603287 | 36.33310275 |
| O  | 17.91694234 | 27.35635907 | 38.33412461 |
| Zn | 19.25058452 | 26.22404301 | 39.17275087 |
| O  | 19.54808247 | 26.38220347 | 41.01741609 |
| Zn | 8.45310100  | 29.13821018 | 39.12622177 |
| O  | 8.11333919  | 29.22370607 | 40.96885662 |
| Zn | 9.74833099  | 29.80889215 | 36.38317772 |
| O  | 9.76460871  | 30.15363211 | 38.22769672 |
| Zn | 11.41397992 | 29.35039560 | 38.93426208 |
| O  | 11.36748634 | 29.23626638 | 40.94878960 |
| Zn | 12.99721674 | 29.77548100 | 36.29695541 |
| O  | 12.99713410 | 30.11373292 | 38.14102868 |
| Zn | 14.58031168 | 29.35041214 | 38.93420582 |
| O  | 14.62658191 | 29.23626414 | 40.94872651 |
| Zn | 16.24618542 | 29.80890008 | 36.38314955 |
| O  | 16.22976697 | 30.15355847 | 38.22769570 |
| Zn | 17.54121156 | 29.13803971 | 39.12619316 |
| O  | 17.88079815 | 29.22358699 | 40.96888926 |
| Zn | 8.38634130  | 16.03811343 | 41.74704741 |
| O  | 8.06093269  | 15.91961817 | 43.59813717 |
| Zn | 9.64556457  | 15.28820421 | 44.40374414 |
| O  | 9.70485487  | 14.93118180 | 46.25352962 |
| Zn | 11.36943726 | 15.78158834 | 41.55665642 |
| O  | 11.34341100 | 15.88517852 | 43.58608092 |
| Zn | 12.99681328 | 15.29458134 | 44.40575842 |
| O  | 12.99663712 | 14.94086622 | 46.25455833 |



|    |             |             |             |
|----|-------------|-------------|-------------|
| Zn | 14.62442732 | 15.78151219 | 41.55681417 |
| O  | 14.65035223 | 15.88511224 | 43.58625677 |
| Zn | 16.34810897 | 15.28810827 | 44.40417879 |
| O  | 16.28848105 | 14.93119413 | 46.25399074 |
| Zn | 17.60745474 | 16.03794572 | 41.74733429 |
| O  | 17.93272244 | 15.91937907 | 43.59846214 |
| Zn | 6.72316461  | 18.94326076 | 41.78750473 |
| O  | 6.42400708  | 18.76684912 | 43.63098292 |
| Zn | 7.93115843  | 17.75988417 | 44.26855182 |
| O  | 8.03645634  | 17.78142831 | 46.29398375 |
| Zn | 9.76024924  | 18.76670216 | 41.59568428 |
| O  | 9.68159356  | 18.73598985 | 43.62226893 |
| Zn | 11.32858708 | 17.84288512 | 44.25531057 |
| O  | 11.34627098 | 17.74220813 | 46.28585308 |
| Zn | 12.99693024 | 18.71786458 | 41.56695547 |
| O  | 12.99687645 | 18.73683645 | 43.61603799 |
| Zn | 14.66512105 | 17.84283779 | 44.25540737 |
| O  | 14.64715928 | 17.74219605 | 46.28598061 |
| Zn | 16.23361039 | 18.76658918 | 41.59579187 |
| O  | 16.31218521 | 18.73586011 | 43.62240168 |
| Zn | 18.06245543 | 17.75967107 | 44.26881145 |
| O  | 17.95690958 | 17.78117395 | 46.29422035 |
| Zn | 19.27066670 | 18.94306025 | 41.78775372 |
| O  | 19.56967634 | 18.76656423 | 43.63125129 |
| Zn | 5.04742742  | 21.84597099 | 41.81554023 |
| O  | 4.78911285  | 21.61096635 | 43.66148941 |
| Zn | 6.32194462  | 20.57020332 | 44.29940136 |
| O  | 6.40626660  | 20.64704616 | 46.31712133 |
| Zn | 8.10126525  | 21.65884655 | 41.62876659 |
| O  | 8.04446872  | 21.59019676 | 43.64632866 |
| Zn | 9.67981430  | 20.63142032 | 44.27058686 |
| O  | 9.70078793  | 20.62793659 | 46.31420572 |
| Zn | 11.35470198 | 21.60899199 | 41.61139731 |
| O  | 11.34410045 | 21.59168586 | 43.64619197 |
| Zn | 12.99688360 | 20.64580473 | 44.27462516 |
| O  | 12.99677299 | 20.60751913 | 46.31383468 |
| Zn | 14.63920737 | 21.60893185 | 41.61148131 |
| O  | 14.64974106 | 21.59161270 | 43.64628643 |
| Zn | 16.31399024 | 20.63130436 | 44.27067089 |
| O  | 16.29279485 | 20.62776491 | 46.31430304 |
| Zn | 17.89267752 | 21.65866884 | 41.62878564 |
| O  | 17.94936708 | 21.59002011 | 43.64637033 |
| Zn | 19.67181581 | 20.56996652 | 44.29951078 |
| O  | 19.58729506 | 20.64678417 | 46.31721104 |
| Zn | 20.94645711 | 21.84574002 | 41.81567442 |
| O  | 21.20473266 | 21.61065920 | 43.66162025 |
| Zn | 5.05308544  | 23.29524110 | 44.47632679 |

|    |             |             |             |
|----|-------------|-------------|-------------|
| O  | 4.78833037  | 23.51188893 | 46.32377706 |
| Zn | 6.32643528  | 24.56535027 | 41.64423733 |
| O  | 6.42334762  | 24.46404141 | 43.65753206 |
| Zn | 8.10756586  | 23.45978351 | 44.30493530 |
| O  | 8.04869747  | 23.49792088 | 46.32166422 |
| Zn | 9.68591138  | 24.49022411 | 41.62028986 |
| O  | 9.71391204  | 24.46123542 | 43.65480623 |
| Zn | 11.35968558 | 23.49392524 | 44.30000743 |
| O  | 11.34748060 | 23.47551841 | 46.33208593 |
| Zn | 12.99704473 | 24.46182978 | 41.62848180 |
| O  | 12.99695581 | 24.46386281 | 43.65856452 |
| Zn | 14.63416017 | 23.49385982 | 44.30002633 |
| O  | 14.64619159 | 23.47543891 | 46.33210827 |
| Zn | 16.30816897 | 24.49012872 | 41.62029507 |
| O  | 16.27999766 | 24.46112482 | 43.65481481 |
| Zn | 17.88630244 | 23.45960248 | 44.30497332 |
| O  | 17.94500087 | 23.49771649 | 46.32172341 |
| Zn | 19.66761625 | 24.56515638 | 41.64427619 |
| O  | 19.57060780 | 24.46380321 | 43.65758384 |
| Zn | 20.94074109 | 23.29492340 | 44.47646874 |
| O  | 21.20538422 | 23.51149254 | 46.32394042 |
| Zn | 6.75016321  | 26.19086638 | 44.48392031 |
| O  | 6.44664820  | 26.33939356 | 46.32662245 |
| Zn | 7.96340781  | 27.38382593 | 41.64857977 |
| O  | 8.08433661  | 27.33378794 | 43.66248643 |
| Zn | 9.77972762  | 26.34791886 | 44.32630640 |
| O  | 9.69888364  | 26.34184439 | 46.34005612 |
| Zn | 11.33981994 | 27.27068537 | 41.64546933 |
| O  | 11.36237195 | 27.33887912 | 43.65969917 |
| Zn | 12.99691699 | 26.38247197 | 44.30768992 |
| O  | 12.99678520 | 26.32905297 | 46.33936007 |
| Zn | 14.65427073 | 27.27068285 | 41.64542628 |
| O  | 14.63153642 | 27.33880692 | 43.65964707 |
| Zn | 16.21414208 | 26.34780321 | 44.32621477 |
| O  | 16.29473833 | 26.34176171 | 46.33995057 |
| Zn | 18.03068985 | 27.38368348 | 41.64855636 |
| O  | 17.90962880 | 27.33365534 | 43.66245624 |
| Zn | 19.24372089 | 26.19065137 | 44.48390148 |
| O  | 19.54700883 | 26.33911235 | 46.32666289 |
| Zn | 8.42746664  | 29.09030752 | 44.52521216 |
| O  | 8.09853421  | 29.17334276 | 46.36816904 |
| Zn | 9.68182956  | 29.81925202 | 41.83256939 |
| O  | 9.74237541  | 30.14580148 | 43.67641527 |
| Zn | 11.39093090 | 29.33168575 | 44.36898716 |
| O  | 11.35789105 | 29.18962771 | 46.37697514 |
| Zn | 12.99703188 | 29.80212060 | 41.84168811 |
| O  | 12.99689727 | 30.13989767 | 43.67845626 |

|    |             |             |             |
|----|-------------|-------------|-------------|
| Zn | 14.60287340 | 29.33164057 | 44.36885172 |
| O  | 14.63563300 | 29.18958262 | 46.37682460 |
| Zn | 16.31224572 | 29.81926016 | 41.83240996 |
| O  | 16.25144151 | 30.14577317 | 43.67629108 |
| Zn | 17.56640014 | 29.09025101 | 44.52497852 |
| O  | 17.89514674 | 29.17331444 | 46.36796077 |
| Zn | 8.37105148  | 15.99322166 | 47.06101962 |
| O  | 8.03640976  | 15.84902063 | 48.91249767 |
| Zn | 9.60893775  | 15.20141621 | 49.71932470 |
| O  | 9.65031352  | 14.83413045 | 51.57696717 |
| Zn | 11.36938829 | 15.73443065 | 46.90328205 |
| O  | 11.33167954 | 15.79999762 | 48.94042459 |
| Zn | 12.99628701 | 15.20216719 | 49.72815317 |
| O  | 12.99616878 | 14.84334341 | 51.59114633 |
| Zn | 14.62379731 | 15.73446888 | 46.90337406 |
| O  | 14.66099915 | 15.79996818 | 48.94052477 |
| Zn | 16.38355989 | 15.20118238 | 49.71930590 |
| O  | 16.34192123 | 14.83382045 | 51.57698834 |
| Zn | 17.62223827 | 15.99320719 | 47.06167791 |
| O  | 17.95649634 | 15.84888787 | 48.91326440 |
| Zn | 6.71033430  | 18.92692855 | 47.14162057 |
| O  | 6.42612777  | 18.74371341 | 48.99416163 |
| Zn | 7.93001690  | 17.69382701 | 49.55936468 |
| O  | 8.02315179  | 17.67243978 | 51.59400600 |
| Zn | 9.75640226  | 18.73443668 | 46.93038431 |
| O  | 9.67933411  | 18.67606319 | 48.96160244 |
| Zn | 11.32153772 | 17.77094333 | 49.57085713 |
| O  | 11.32970019 | 17.63979852 | 51.61046746 |
| Zn | 12.99667953 | 18.68501466 | 46.91141652 |
| O  | 12.99659294 | 18.66719586 | 48.96640834 |
| Zn | 14.67156876 | 17.77097652 | 49.57089831 |
| O  | 14.66335198 | 17.63985202 | 51.61050041 |
| Zn | 16.23703848 | 18.73432864 | 46.93065025 |
| O  | 16.31403472 | 18.67583769 | 48.96191362 |
| Zn | 18.06349024 | 17.69370652 | 49.56007366 |
| O  | 17.97055229 | 17.67238395 | 51.59483442 |
| Zn | 19.28305066 | 18.92672816 | 47.14172295 |
| O  | 19.56724154 | 18.74329607 | 48.99420123 |
| Zn | 5.03433089  | 21.82929799 | 47.13346038 |
| O  | 4.77304346  | 21.58249587 | 48.97763376 |
| Zn | 6.29570389  | 20.56124229 | 49.64451298 |
| O  | 6.33695787  | 20.63975319 | 51.68269829 |
| Zn | 8.09746071  | 21.63764089 | 46.97858980 |
| O  | 8.03835171  | 21.55125587 | 49.00334556 |
| Zn | 9.66765267  | 20.57885546 | 49.60297210 |
| O  | 9.66954268  | 20.53917465 | 51.66226206 |
| Zn | 11.35891263 | 21.57673761 | 46.96476682 |

|    |             |             |             |
|----|-------------|-------------|-------------|
| O  | 11.34702032 | 21.52474897 | 49.00616811 |
| Zn | 12.99671245 | 20.58011254 | 49.63222276 |
| O  | 12.99679199 | 20.49636031 | 51.69464979 |
| Zn | 14.63467394 | 21.57664293 | 46.96476401 |
| O  | 14.64652676 | 21.52462186 | 49.00616903 |
| Zn | 16.32588625 | 20.57869922 | 49.60303958 |
| O  | 16.32422514 | 20.53893160 | 51.66238157 |
| Zn | 17.89614626 | 21.63744616 | 46.97864778 |
| O  | 17.95520391 | 21.55103736 | 49.00340028 |
| Zn | 19.69779871 | 20.56070218 | 49.64471686 |
| O  | 19.65622252 | 20.63935532 | 51.68281146 |
| Zn | 20.95923764 | 21.82892066 | 47.13367295 |
| O  | 21.22040640 | 21.58197756 | 48.97782124 |
| Zn | 5.03689787  | 23.26915938 | 49.79595345 |
| O  | 4.72018776  | 23.50731230 | 51.62712448 |
| Zn | 6.33075530  | 24.53595486 | 46.98096714 |
| O  | 6.42356614  | 24.41623935 | 48.98735152 |
| Zn | 8.09109645  | 23.42996402 | 49.67589805 |
| O  | 8.00355750  | 23.46434925 | 51.69631406 |
| Zn | 9.68517807  | 24.44718740 | 46.97313656 |
| O  | 9.71047040  | 24.39566633 | 49.00561980 |
| Zn | 11.35689899 | 23.44309200 | 49.65283663 |
| O  | 11.34251341 | 23.39607458 | 51.68355759 |
| Zn | 12.99684021 | 24.42290948 | 46.98624247 |
| O  | 12.99682339 | 24.40434279 | 49.01591129 |
| Zn | 14.63669869 | 23.44298740 | 49.65270078 |
| O  | 14.65111463 | 23.39592630 | 51.68340053 |
| Zn | 16.30851746 | 24.44709066 | 46.97301349 |
| O  | 16.28315987 | 24.39560748 | 49.00548091 |
| Zn | 17.90251352 | 23.42984433 | 49.67566555 |
| O  | 17.99005496 | 23.46441794 | 51.69601991 |
| Zn | 19.66300565 | 24.53565110 | 46.98099944 |
| O  | 19.57027216 | 24.41600483 | 48.98739236 |
| Zn | 20.95668540 | 23.26863411 | 49.79624260 |
| O  | 21.27319222 | 23.50639797 | 51.62754958 |
| Zn | 6.73415516  | 26.13118078 | 49.86366260 |
| O  | 6.39212983  | 26.26994171 | 51.68534345 |
| Zn | 7.94868958  | 27.32581956 | 47.01450894 |
| O  | 8.06709679  | 27.25619042 | 49.01900149 |
| Zn | 9.77136037  | 26.29074741 | 49.68902260 |
| O  | 9.68712294  | 26.28658043 | 51.68024694 |
| Zn | 11.33728661 | 27.22192124 | 47.02686420 |
| O  | 11.36135127 | 27.27975979 | 49.03739670 |
| Zn | 12.99677123 | 26.33067242 | 49.68377385 |
| O  | 12.99676191 | 26.26770910 | 51.71297718 |
| Zn | 14.65630549 | 27.22192009 | 47.02673981 |
| O  | 14.63212739 | 27.27984126 | 49.03724851 |

|    |             |             |             |
|----|-------------|-------------|-------------|
| Zn | 16.22212737 | 26.29076829 | 49.68862211 |
| O  | 16.30633637 | 26.28662373 | 51.67982938 |
| Zn | 18.04485514 | 27.32573227 | 47.01414079 |
| O  | 17.92628971 | 27.25637435 | 49.01859576 |
| Zn | 19.25948169 | 26.13138653 | 49.86275382 |
| O  | 19.60140646 | 26.27076574 | 51.68444835 |
| Zn | 8.40280470  | 28.99524354 | 49.91273948 |
| O  | 8.05417689  | 29.07716404 | 51.74922673 |
| Zn | 9.66303454  | 29.76370642 | 47.24508202 |
| O  | 9.72458058  | 30.06919501 | 49.09232458 |
| Zn | 11.38189255 | 29.27443587 | 49.78117097 |
| O  | 11.34143394 | 29.13767401 | 51.79380653 |
| Zn | 12.99681636 | 29.74991204 | 47.25934060 |
| O  | 12.99670531 | 30.07241057 | 49.10096614 |
| Zn | 14.61161479 | 29.27454459 | 49.78108449 |
| O  | 14.65211650 | 29.13771314 | 51.79369049 |
| Zn | 16.33054531 | 29.76368421 | 47.24471122 |
| O  | 16.26871369 | 30.06942838 | 49.09185672 |
| Zn | 17.59058288 | 28.99554870 | 49.91218387 |
| O  | 17.93913079 | 29.07764624 | 51.74863376 |
| Zn | 8.32251686  | 15.90792832 | 52.39360174 |
| O  | 8.00710714  | 15.72464576 | 54.26577361 |
| Zn | 9.57825208  | 14.93162053 | 54.92646848 |
| O  | 9.67607264  | 14.64850041 | 56.89643552 |
| Zn | 11.33303160 | 15.63851758 | 52.15809276 |
| O  | 11.28953053 | 15.55837751 | 54.21275170 |
| Zn | 12.99605693 | 14.85727714 | 54.75516136 |
| O  | 12.99680187 | 14.28836051 | 56.63781367 |
| Zn | 14.65927645 | 15.63870288 | 52.15785063 |
| O  | 14.70249037 | 15.55845949 | 54.21238614 |
| Zn | 16.41335081 | 14.93017846 | 54.92448406 |
| O  | 16.31599011 | 14.64500472 | 56.89456581 |
| Zn | 17.67040815 | 15.90737489 | 52.39277041 |
| O  | 17.98553398 | 15.72258144 | 54.26500728 |
| Zn | 6.68084396  | 18.85121502 | 52.31441288 |
| O  | 6.41009847  | 18.65674614 | 54.19761386 |
| Zn | 7.82168139  | 17.58844359 | 54.89318772 |
| O  | 7.66962926  | 17.56416610 | 56.95951198 |
| Zn | 9.73469234  | 18.63691673 | 52.24344169 |
| O  | 9.63411531  | 18.49706781 | 54.27483079 |
| Zn | 11.24212186 | 17.56629762 | 54.91082424 |
| O  | 11.36482142 | 17.24051379 | 56.90637757 |
| Zn | 12.99643371 | 18.54760932 | 52.22322429 |
| O  | 12.99634198 | 18.41566211 | 54.31044841 |
| Zn | 14.75056103 | 17.56645228 | 54.91108419 |
| O  | 14.62628417 | 17.24085954 | 56.90600376 |
| Zn | 16.25840081 | 18.63664440 | 52.24357507 |

|    |             |             |             |
|----|-------------|-------------|-------------|
| O  | 16.35917720 | 18.49631799 | 54.27498613 |
| Zn | 18.17145519 | 17.58603006 | 54.89226813 |
| O  | 18.32608936 | 17.55732694 | 56.95807531 |
| Zn | 19.31188177 | 18.85180552 | 52.31643748 |
| O  | 19.58195408 | 18.65799042 | 54.19984509 |
| Zn | 4.92422358  | 21.89335787 | 52.52340856 |
| O  | 4.76891748  | 21.58309876 | 54.36500359 |
| Zn | 6.27762221  | 20.49842283 | 54.58104569 |
| O  | 7.17615720  | 20.75324751 | 58.39537241 |
| Zn | 8.07217023  | 21.60197016 | 52.28110557 |
| O  | 8.02843204  | 21.47455088 | 54.34121297 |
| Zn | 9.62377695  | 20.41199421 | 54.86133269 |
| O  | 9.60678674  | 20.33319594 | 56.95221969 |
| Zn | 11.33603040 | 21.50527381 | 52.27808220 |
| O  | 11.33680003 | 21.36567494 | 54.34557399 |
| Zn | 12.99717193 | 20.37160197 | 54.70369516 |
| O  | 12.99861529 | 20.18992841 | 56.96317570 |
| Zn | 14.65768280 | 21.50515703 | 52.27800948 |
| O  | 14.65772795 | 21.36503297 | 54.34532080 |
| Zn | 16.37077187 | 20.41149898 | 54.86071015 |
| O  | 16.39285372 | 20.33216091 | 56.95233283 |
| Zn | 17.92129910 | 21.60220511 | 52.28121049 |
| O  | 17.96515187 | 21.47567915 | 54.34125593 |
| Zn | 19.71526035 | 20.49934274 | 54.58526675 |
| O  | 18.83252341 | 20.74953851 | 58.37957692 |
| Zn | 21.06764331 | 21.89246906 | 52.52406359 |
| O  | 21.22306570 | 21.58439610 | 54.36624336 |
| Zn | 5.04688863  | 23.19061302 | 55.49955014 |
| O  | 4.51724538  | 22.84198704 | 57.24093344 |
| Zn | 6.22186201  | 24.51145769 | 52.41771759 |
| O  | 6.26475147  | 24.30931780 | 54.43362774 |
| Zn | 8.02949173  | 23.47605882 | 54.91535536 |
| O  | 8.06056278  | 23.57139257 | 56.91257987 |
| Zn | 9.67022303  | 24.41396060 | 52.32366324 |
| O  | 9.72962593  | 24.32513444 | 54.32685882 |
| Zn | 11.36775284 | 23.38060863 | 54.97981293 |
| O  | 11.12833378 | 23.07465658 | 56.94914451 |
| Zn | 12.99688861 | 24.36282268 | 52.33700270 |
| O  | 12.99708127 | 24.34089643 | 54.36568733 |
| Zn | 14.62619443 | 23.38020270 | 54.97989482 |
| O  | 14.86564543 | 23.07314905 | 56.94858300 |
| Zn | 16.32329138 | 24.41403931 | 52.32328757 |
| O  | 16.26408513 | 24.32532892 | 54.32638640 |
| Zn | 17.96502860 | 23.47783496 | 54.91433529 |
| O  | 17.93467482 | 23.57254323 | 56.91158805 |
| Zn | 19.77198978 | 24.51225018 | 52.41635535 |
| O  | 19.72921607 | 24.31225590 | 54.43222021 |

|    |             |             |             |
|----|-------------|-------------|-------------|
| Zn | 20.94985663 | 23.19654271 | 55.49665506 |
| O  | 21.48563130 | 22.85035978 | 57.23705328 |
| Zn | 6.33855265  | 26.20179240 | 55.10656233 |
| O  | 5.10612662  | 27.09720313 | 56.12888480 |
| Zn | 7.87213729  | 27.25475818 | 52.47012287 |
| O  | 7.94151709  | 27.01380224 | 54.37752591 |
| Zn | 9.61387434  | 26.33518341 | 54.99622572 |
| O  | 9.73745926  | 26.26690586 | 57.00000240 |
| Zn | 11.31614723 | 27.15166290 | 52.39773065 |
| O  | 11.31409224 | 27.24733043 | 54.39581250 |
| Zn | 12.99673522 | 26.29501367 | 55.06152503 |
| O  | 12.99660773 | 26.59227829 | 57.01913650 |
| Zn | 14.67738139 | 27.15174710 | 52.39756588 |
| O  | 14.67926429 | 27.24730459 | 54.39563359 |
| Zn | 16.37949860 | 26.33497741 | 54.99630081 |
| O  | 16.25573634 | 26.26520196 | 56.99982099 |
| Zn | 18.12084152 | 27.25494364 | 52.46909168 |
| O  | 18.05097025 | 27.01514946 | 54.37668476 |
| Zn | 19.65482917 | 26.20503618 | 55.10497919 |
| O  | 20.88729417 | 27.10008734 | 56.12730462 |
| Zn | 8.23558259  | 30.12702650 | 55.40549522 |
| O  | 6.77108136  | 30.23147801 | 56.38607030 |
| Zn | 9.60623499  | 29.68039701 | 52.61166969 |
| O  | 9.74470298  | 30.21162807 | 54.41420910 |
| Zn | 11.28170429 | 29.23157027 | 55.11327519 |
| O  | 11.22204917 | 29.25570247 | 57.14603707 |
| Zn | 12.99683868 | 29.67529495 | 52.67520095 |
| O  | 12.99671403 | 29.97171152 | 54.52806958 |
| Zn | 14.71181004 | 29.23114885 | 55.11302079 |
| O  | 14.77236148 | 29.25470071 | 57.14570540 |
| Zn | 16.38745413 | 29.68074300 | 52.61166857 |
| O  | 16.24808311 | 30.21257856 | 54.41400866 |
| Zn | 17.75679287 | 30.12852964 | 55.40553896 |
| O  | 19.22116982 | 30.23361706 | 56.38613681 |
| Zn | 8.72013852  | 16.14810568 | 57.23548806 |
| Zn | 11.48707008 | 15.31851894 | 57.10066365 |
| Zn | 14.50654206 | 15.31939463 | 57.10022479 |
| Zn | 17.27716351 | 16.14064861 | 57.23453909 |
| Zn | 8.01225703  | 19.24842241 | 57.62750338 |
| Zn | 12.99553875 | 18.23912105 | 57.13041695 |
| Zn | 17.98751887 | 19.24430132 | 57.62019446 |
| Zn | 5.73111441  | 21.75589416 | 57.89007289 |
| Zn | 8.52078847  | 21.88066152 | 57.42228813 |
| Zn | 11.37570138 | 21.23023521 | 57.12316155 |
| Zn | 14.62355203 | 21.22802186 | 57.12322112 |
| Zn | 17.48200594 | 21.87908535 | 57.41771906 |
| Zn | 20.27714829 | 21.75509473 | 57.88110071 |

|    |             |             |             |
|----|-------------|-------------|-------------|
| Zn | 9.78980217  | 24.43487465 | 57.22152740 |
| Zn | 16.20421315 | 24.43289434 | 57.22138132 |
| Zn | 5.90134915  | 28.67276512 | 56.29235656 |
| Zn | 11.24923182 | 27.30745817 | 57.32180770 |
| Zn | 14.74438105 | 27.30636802 | 57.32175312 |
| Zn | 20.09177332 | 28.67534305 | 56.29160808 |
| Zn | 12.99732034 | 29.55177037 | 57.29952139 |

**WZ-324**

|    |             |             |             |
|----|-------------|-------------|-------------|
| O  | 8.12007050  | 15.97697959 | 27.63215912 |
| Zn | 9.64602352  | 15.34309947 | 28.40843045 |
| O  | 9.74262274  | 14.83032934 | 30.25421243 |
| O  | 11.36767521 | 15.88390042 | 27.82983994 |
| Zn | 12.99730038 | 15.26717382 | 28.53691057 |
| O  | 12.99737090 | 14.81374761 | 30.39017399 |
| O  | 14.62694262 | 15.88404315 | 27.82995254 |
| Zn | 16.34872110 | 15.34351769 | 28.40852519 |
| O  | 16.25220764 | 14.83071957 | 30.25436347 |
| O  | 17.87456459 | 15.97765765 | 27.63223101 |
| O  | 6.44169268  | 18.72621942 | 28.76300942 |
| Zn | 8.00081197  | 17.71060392 | 28.32562782 |
| O  | 8.17639106  | 17.60867064 | 30.47867473 |
| O  | 9.67378637  | 18.70680659 | 28.06851777 |
| Zn | 11.34821857 | 17.79950279 | 28.30819098 |
| O  | 11.36977449 | 17.65365607 | 30.46263560 |
| O  | 12.99721534 | 18.73890408 | 28.03029449 |
| Zn | 14.64630962 | 17.79966071 | 28.30819717 |
| O  | 14.62478700 | 17.65386243 | 30.46270550 |
| O  | 16.32079745 | 18.70703471 | 28.06886500 |
| Zn | 17.99403270 | 17.71126203 | 28.32586875 |
| O  | 17.81843197 | 17.60935463 | 30.47899459 |
| O  | 19.55215578 | 18.72721074 | 28.76099305 |
| O  | 4.89952881  | 21.55400574 | 27.63221977 |
| Zn | 6.34141749  | 20.58430294 | 28.32592111 |
| O  | 6.34102178  | 20.78725171 | 30.47902108 |
| O  | 8.04045916  | 21.53547733 | 28.06867727 |
| Zn | 9.68001665  | 20.59627683 | 28.38771593 |
| O  | 9.67853777  | 20.59526077 | 30.53280819 |
| O  | 11.33658856 | 21.55275817 | 28.11822185 |
| Zn | 12.99715304 | 20.62228243 | 28.40856625 |
| O  | 12.99719203 | 20.57848737 | 30.54353460 |
| O  | 14.65763534 | 21.55289489 | 28.11821616 |
| Zn | 16.31435297 | 20.59661745 | 28.38765868 |
| O  | 16.31593038 | 20.59574654 | 30.53275358 |
| O  | 17.95391891 | 21.53576924 | 28.06843900 |
| Zn | 19.65288858 | 20.58454428 | 28.32580988 |



|    |             |             |             |
|----|-------------|-------------|-------------|
| O  | 19.65340828 | 20.78800121 | 30.47888183 |
| O  | 21.09454394 | 21.55452908 | 27.63183299 |
| Zn | 5.11406848  | 23.19270326 | 28.40766172 |
| O  | 4.71831258  | 23.53308453 | 30.25353704 |
| O  | 6.44288584  | 24.41374497 | 27.82918120 |
| Zn | 8.09217836  | 23.43934572 | 28.30784138 |
| O  | 7.97655143  | 23.53086791 | 30.46216917 |
| O  | 9.73003254  | 24.39787563 | 28.02937922 |
| Zn | 11.36084253 | 23.45609502 | 28.40853778 |
| O  | 11.32292613 | 23.47781988 | 30.54337269 |
| O  | 12.99700524 | 24.42894685 | 28.11816516 |
| Zn | 14.63324924 | 23.45623188 | 28.40853378 |
| O  | 14.67114886 | 23.47800107 | 30.54336882 |
| O  | 16.26399976 | 24.39811343 | 28.02938333 |
| Zn | 17.90194084 | 23.43966186 | 28.30774487 |
| O  | 18.01762491 | 23.53132327 | 30.46201333 |
| O  | 19.55114543 | 24.41422890 | 27.82901936 |
| Zn | 20.88001514 | 23.19316086 | 28.40742223 |
| O  | 21.27584261 | 23.53382661 | 30.25324494 |
| Zn | 6.72377680  | 26.13384367 | 28.53531220 |
| O  | 6.33061431  | 26.36038257 | 30.38865600 |
| O  | 8.07266270  | 27.23694920 | 27.82865682 |
| Zn | 9.74103430  | 26.29561554 | 28.30756509 |
| O  | 9.60351187  | 26.34952955 | 30.46187596 |
| O  | 11.36393117 | 27.29238474 | 28.06837424 |
| Zn | 12.99688962 | 26.34179267 | 28.38766905 |
| O  | 12.99680518 | 26.34322496 | 30.53267516 |
| O  | 14.62985443 | 27.29250078 | 28.06868431 |
| Zn | 16.25285805 | 26.29584193 | 28.30760539 |
| O  | 16.39028581 | 26.34976128 | 30.46198801 |
| O  | 17.92114866 | 27.23730765 | 27.82879187 |
| Zn | 19.27016126 | 26.13424051 | 28.53530878 |
| O  | 19.66328191 | 26.36089204 | 30.38864991 |
| Zn | 8.46513716  | 28.99829064 | 28.40761183 |
| O  | 7.97235776  | 29.17050665 | 30.25339198 |
| O  | 9.77712901  | 30.00331737 | 27.63211189 |
| Zn | 11.33787292 | 29.23924403 | 28.32575926 |
| O  | 11.16161320 | 29.13750197 | 30.47867524 |
| O  | 12.99673720 | 30.08150727 | 28.76249103 |
| Zn | 14.65571281 | 29.23938701 | 28.32593804 |
| O  | 14.83171154 | 29.13769021 | 30.47891883 |
| O  | 16.21643413 | 30.00353196 | 27.63234642 |
| Zn | 17.52853078 | 28.99860569 | 28.40780546 |
| O  | 18.02117129 | 29.17089027 | 30.25363454 |
| Zn | 8.45098494  | 15.83607578 | 31.17713423 |
| O  | 8.04818859  | 15.79272857 | 33.01841066 |
| Zn | 9.63729891  | 15.22444781 | 33.85532151 |

|    |             |             |             |
|----|-------------|-------------|-------------|
| O  | 9.69676165  | 14.88636061 | 35.70687036 |
| Zn | 11.38133271 | 15.69093800 | 30.97014063 |
| O  | 11.32850561 | 15.78380483 | 33.01404386 |
| Zn | 12.99730684 | 15.21586941 | 33.81156289 |
| O  | 12.99766726 | 14.88899083 | 35.67003185 |
| Zn | 14.61330636 | 15.69113277 | 30.97009187 |
| O  | 14.66609666 | 15.78404170 | 33.01401626 |
| Zn | 16.35739065 | 15.22497597 | 33.85499518 |
| O  | 16.29884539 | 14.88741501 | 35.70676116 |
| Zn | 17.54382315 | 15.83664295 | 31.17713413 |
| O  | 17.94663037 | 15.79361082 | 33.01845801 |
| Zn | 6.63235654  | 18.83616441 | 30.74493526 |
| O  | 6.44801913  | 18.72929386 | 32.67811671 |
| Zn | 7.88544388  | 17.71761154 | 33.47417985 |
| O  | 8.00038902  | 17.73249378 | 35.56264571 |
| Zn | 9.77640963  | 18.68412140 | 30.99930870 |
| O  | 9.67366522  | 18.66575301 | 33.06558226 |
| Zn | 11.32455290 | 17.77078338 | 33.63716910 |
| O  | 11.34130189 | 17.69645577 | 35.68488553 |
| Zn | 12.99720002 | 18.64676457 | 30.98356750 |
| O  | 12.99718672 | 18.66786105 | 33.07463364 |
| Zn | 14.67009181 | 17.77115545 | 33.63681302 |
| O  | 14.65387409 | 17.69710325 | 35.68453206 |
| Zn | 16.21808296 | 18.68458254 | 30.99910693 |
| O  | 16.32088895 | 18.66640194 | 33.06544608 |
| Zn | 18.10932346 | 17.71861994 | 33.47370233 |
| O  | 17.99529670 | 17.73450629 | 35.56204021 |
| Zn | 19.36232106 | 18.83703708 | 30.74530856 |
| O  | 19.54687187 | 18.73053437 | 32.67838265 |
| Zn | 4.94344806  | 21.91218787 | 31.17713617 |
| O  | 4.70528407  | 21.58422242 | 33.01837132 |
| Zn | 6.29071362  | 20.48020111 | 33.47340804 |
| O  | 6.36115646  | 20.57161231 | 35.56194647 |
| Zn | 8.07237720  | 21.63589198 | 30.99897826 |
| O  | 8.00569159  | 21.55517588 | 33.06528649 |
| Zn | 9.65618314  | 20.58179211 | 33.60441014 |
| O  | 9.67809557  | 20.59467068 | 35.68192487 |
| Zn | 11.34577882 | 21.55797163 | 31.02922935 |
| O  | 11.33265084 | 21.55006339 | 33.10713318 |
| Zn | 12.99723489 | 20.59647719 | 33.64200884 |
| O  | 12.99734684 | 20.58502980 | 35.71002713 |
| Zn | 14.64851247 | 21.55814081 | 31.02920232 |
| O  | 14.66168869 | 21.55027147 | 33.10710365 |
| Zn | 16.33841119 | 20.58244357 | 33.60436544 |
| O  | 16.31681210 | 20.59584463 | 35.68187994 |
| Zn | 17.92202967 | 21.63641494 | 30.99909420 |
| O  | 17.98890887 | 21.55581416 | 33.06533797 |

|    |             |             |             |
|----|-------------|-------------|-------------|
| Zn | 19.70412055 | 20.48136344 | 33.47388597 |
| O  | 19.63412845 | 20.57390093 | 35.56255762 |
| Zn | 21.05095567 | 21.91297749 | 31.17701834 |
| O  | 21.28942537 | 21.58522731 | 33.01817909 |
| Zn | 5.00757987  | 23.24455404 | 33.85556583 |
| O  | 4.74418360  | 23.46401096 | 35.70719334 |
| Zn | 6.28278091  | 24.52260682 | 30.96928848 |
| O  | 6.33689947  | 24.42954548 | 33.01345328 |
| Zn | 8.05554377  | 23.43229259 | 33.63697535 |
| O  | 7.99959023  | 23.48404666 | 35.68451469 |
| Zn | 9.65011466  | 24.44378571 | 30.98371946 |
| O  | 9.66855550  | 24.43287600 | 33.07454600 |
| Zn | 11.33879449 | 23.46842131 | 33.64189726 |
| O  | 11.32850583 | 23.47477218 | 35.70992062 |
| Zn | 12.99699008 | 24.41791325 | 31.02916128 |
| O  | 12.99697612 | 24.43315089 | 33.10701119 |
| Zn | 14.65528242 | 23.46863118 | 33.64187711 |
| O  | 14.66545257 | 23.47517700 | 35.70990242 |
| Zn | 16.34396647 | 24.44396427 | 30.98369551 |
| O  | 16.32556147 | 24.43301368 | 33.07452251 |
| Zn | 17.93877505 | 23.43286061 | 33.63726204 |
| O  | 17.99470282 | 23.48518166 | 35.68480814 |
| Zn | 19.71134709 | 24.52310972 | 30.96927870 |
| O  | 19.65733295 | 24.43000059 | 33.01342134 |
| Zn | 20.98687981 | 23.24522825 | 33.85581272 |
| O  | 21.25025162 | 23.46572737 | 35.70722772 |
| Zn | 6.67970864  | 26.15855871 | 33.81124434 |
| O  | 6.39610693  | 26.32214998 | 35.66965186 |
| Zn | 7.89812067  | 27.32106157 | 30.96932197 |
| O  | 8.00539432  | 27.32023746 | 33.01340564 |
| Zn | 9.72804036  | 26.33005959 | 33.63698259 |
| O  | 9.65512815  | 26.35313348 | 35.68458214 |
| Zn | 11.29255706 | 27.21382519 | 30.99875509 |
| O  | 11.32852301 | 27.31215004 | 33.06508930 |
| Zn | 12.99671114 | 26.36928745 | 33.60366591 |
| O  | 12.99639969 | 26.34444722 | 35.68138311 |
| Zn | 14.70106203 | 27.21387524 | 30.99858669 |
| O  | 14.66491323 | 27.31212241 | 33.06499131 |
| Zn | 16.26559366 | 26.33023568 | 33.63663870 |
| O  | 16.33800241 | 26.35362301 | 35.68424514 |
| Zn | 18.09565417 | 27.32135885 | 30.96930230 |
| O  | 17.98838751 | 27.32044182 | 33.01341146 |
| Zn | 19.31429623 | 26.15887689 | 33.81122652 |
| O  | 19.59751418 | 26.32309478 | 35.66964355 |
| Zn | 8.36666068  | 29.06434784 | 33.85521122 |
| O  | 8.04411298  | 29.18233368 | 35.70670933 |
| Zn | 9.48893656  | 29.78590716 | 31.17676749 |

|    |             |             |             |
|----|-------------|-------------|-------------|
| O  | 9.65301446  | 30.15654377 | 33.01793638 |
| Zn | 11.40121055 | 29.33479845 | 33.47364166 |
| O  | 11.35681988 | 29.22839514 | 35.56215752 |
| Zn | 12.99658202 | 29.86108986 | 30.74510068 |
| O  | 12.99636869 | 30.07390610 | 32.67816356 |
| Zn | 14.59170788 | 29.33479913 | 33.47315698 |
| O  | 14.63481824 | 29.22862962 | 35.56153913 |
| Zn | 16.50443022 | 29.78614038 | 31.17684343 |
| O  | 16.34004705 | 30.15662151 | 33.01807371 |
| Zn | 17.62679915 | 29.06446722 | 33.85491292 |
| O  | 17.94842699 | 29.18299680 | 35.70663614 |
| Zn | 8.34688849  | 16.00024699 | 36.42716589 |
| O  | 8.03683594  | 15.86145770 | 38.29184961 |
| Zn | 9.62063707  | 15.23727553 | 39.09612098 |
| O  | 9.69898765  | 14.89881113 | 40.95831960 |
| Zn | 11.37512598 | 15.70639705 | 36.30208641 |
| O  | 11.34214342 | 15.82583801 | 38.33130824 |
| Zn | 12.99785905 | 15.23575468 | 39.13259754 |
| O  | 12.99850333 | 14.89880295 | 40.98893050 |
| Zn | 14.62005322 | 15.70714308 | 36.30141679 |
| O  | 14.65308068 | 15.82652513 | 38.33053130 |
| Zn | 16.37568256 | 15.23771240 | 39.09226373 |
| O  | 16.29858804 | 14.89857510 | 40.95429573 |
| Zn | 17.64923891 | 16.00185960 | 36.42533988 |
| O  | 17.95989597 | 15.86341584 | 38.28999079 |
| Zn | 6.69871670  | 18.87401043 | 36.42313903 |
| O  | 6.41252090  | 18.70810983 | 38.27892881 |
| Zn | 7.92233912  | 17.70989003 | 38.92560050 |
| O  | 8.03762687  | 17.73746193 | 40.96410937 |
| Zn | 9.72524376  | 18.68955534 | 36.23613876 |
| O  | 9.66319347  | 18.67656593 | 38.29542944 |
| Zn | 11.31850530 | 17.79863507 | 38.92065614 |
| O  | 11.34447918 | 17.72100259 | 40.96966472 |
| Zn | 12.99744074 | 18.65663418 | 36.25952776 |
| O  | 12.99756501 | 18.68829521 | 38.32668307 |
| Zn | 14.67730508 | 17.79936070 | 38.91999802 |
| O  | 14.65244317 | 17.72186515 | 40.96863492 |
| Zn | 16.26982686 | 18.69058753 | 36.23543842 |
| O  | 16.33219824 | 18.67771154 | 38.29450673 |
| Zn | 18.07325290 | 17.71171448 | 38.92440302 |
| O  | 17.95856038 | 17.73962158 | 40.96267131 |
| Zn | 19.29666510 | 18.87596545 | 36.42308774 |
| O  | 19.58318433 | 18.71063014 | 38.27888329 |
| Zn | 5.03389859  | 21.73731762 | 36.42601425 |
| O  | 4.75872806  | 21.53769673 | 38.29062021 |
| Zn | 6.30261394  | 20.51504754 | 38.92486009 |
| O  | 6.38390979  | 20.60096096 | 40.96301672 |

|    |             |             |             |
|----|-------------|-------------|-------------|
| Zn | 8.05159939  | 21.58813329 | 36.23582862 |
| O  | 8.00976940  | 21.53977174 | 38.29478060 |
| Zn | 9.65910763  | 20.58327757 | 38.88534026 |
| O  | 9.68792611  | 20.60063928 | 40.96205834 |
| Zn | 11.34234216 | 21.55614601 | 36.26900384 |
| O  | 11.33319145 | 21.55033337 | 38.33489777 |
| Zn | 12.99735414 | 20.60818227 | 38.91715123 |
| O  | 12.99747602 | 20.59440515 | 40.98279172 |
| Zn | 14.65212155 | 21.55654826 | 36.26898330 |
| O  | 14.66126178 | 21.55077484 | 38.33488083 |
| Zn | 16.33555331 | 20.58408124 | 38.88531921 |
| O  | 16.30669534 | 20.60149203 | 40.96204485 |
| Zn | 17.94310079 | 21.58936924 | 36.23645998 |
| O  | 17.98483270 | 21.54134724 | 38.29564240 |
| Zn | 19.69247073 | 20.51713134 | 38.92594336 |
| O  | 19.61109599 | 20.60375469 | 40.96434232 |
| Zn | 20.96081372 | 21.73977464 | 36.42780306 |
| O  | 21.23593783 | 21.54084313 | 38.29244806 |
| Zn | 5.00906721  | 23.22256460 | 39.09288411 |
| O  | 4.75379906  | 23.45885969 | 40.95487512 |
| Zn | 6.29334472  | 24.50835303 | 36.30177735 |
| O  | 6.38036159  | 24.41961447 | 38.33081471 |
| Zn | 8.07659410  | 23.41198416 | 38.92056999 |
| O  | 8.02168561  | 23.47312181 | 40.96897741 |
| Zn | 9.65854746  | 24.43912078 | 36.25974480 |
| O  | 9.68615218  | 24.42252346 | 38.32683492 |
| Zn | 11.34898281 | 23.46251364 | 38.91715419 |
| O  | 11.33641968 | 23.47026489 | 40.98277188 |
| Zn | 12.99686448 | 24.42269977 | 36.26880295 |
| O  | 12.99682832 | 24.43295163 | 38.33476361 |
| Zn | 14.64492797 | 23.46295352 | 38.91713411 |
| O  | 14.65727808 | 23.47098013 | 40.98275971 |
| Zn | 16.33533014 | 24.43966581 | 36.25971154 |
| O  | 16.30757167 | 24.42330370 | 38.32680991 |
| Zn | 17.91741551 | 23.41370374 | 38.92116430 |
| O  | 17.97179121 | 23.47590512 | 40.96995974 |
| Zn | 19.70104090 | 24.50952133 | 36.30239249 |
| O  | 19.61394612 | 24.42080330 | 38.33156303 |
| Zn | 20.98446418 | 23.22457318 | 39.09671937 |
| O  | 21.23844170 | 23.46159775 | 40.95890341 |
| Zn | 6.69687205  | 26.14827132 | 39.13287109 |
| O  | 6.40394335  | 26.31681237 | 40.98905083 |
| Zn | 7.91490276  | 27.31889782 | 36.30208100 |
| O  | 8.03514592  | 27.28760634 | 38.33132294 |
| Zn | 9.75537602  | 26.32150552 | 38.92076295 |
| O  | 9.67482330  | 26.33850563 | 40.96964279 |
| Zn | 11.32302687 | 27.25624338 | 36.23569541 |

|    |             |             |             |
|----|-------------|-------------|-------------|
| O  | 11.34319172 | 27.31630098 | 38.29517375 |
| Zn | 12.99660675 | 26.36631630 | 38.88484209 |
| O  | 12.99658157 | 26.33344036 | 40.96167939 |
| Zn | 14.66981973 | 27.25645141 | 36.23501508 |
| O  | 14.64938139 | 27.31675219 | 38.29427567 |
| Zn | 16.23735418 | 26.32250945 | 38.92008357 |
| O  | 16.31720044 | 26.34045054 | 40.96859262 |
| Zn | 18.07814232 | 27.31932728 | 36.30139626 |
| O  | 17.95791560 | 27.28812677 | 38.33053357 |
| Zn | 19.29655710 | 26.14955052 | 39.13279819 |
| O  | 19.58879509 | 26.31921498 | 40.98900007 |
| Zn | 8.38615115  | 29.07292699 | 39.09591847 |
| O  | 8.05374130  | 29.17442626 | 40.95812175 |
| Zn | 9.68368278  | 29.79453860 | 36.42707785 |
| O  | 9.71846013  | 30.13259897 | 38.29167491 |
| Zn | 11.37639725 | 29.30731674 | 38.92539187 |
| O  | 11.34251376 | 29.19425896 | 40.96382750 |
| Zn | 12.99593542 | 29.78551187 | 36.42277453 |
| O  | 12.99560275 | 30.11602801 | 38.27853721 |
| Zn | 14.61547743 | 29.30759676 | 38.92425649 |
| O  | 14.64879043 | 29.19494025 | 40.96246723 |
| Zn | 16.30809055 | 29.79535747 | 36.42525055 |
| O  | 16.27270092 | 30.13380628 | 38.28980861 |
| Zn | 17.60653820 | 29.07452022 | 39.09201990 |
| O  | 17.93893469 | 29.17746555 | 40.95405181 |
| Zn | 8.37301003  | 15.96383718 | 41.76557285 |
| O  | 8.05095904  | 15.85156957 | 43.62694854 |
| Zn | 9.64365591  | 15.22680488 | 44.41721600 |
| O  | 9.71394398  | 14.88446075 | 46.27697672 |
| Zn | 11.36519815 | 15.71808052 | 41.58205471 |
| O  | 11.34259067 | 15.83269887 | 43.62176181 |
| Zn | 13.00291175 | 15.23618496 | 44.41483996 |
| O  | 13.00337338 | 14.89555643 | 46.27110917 |
| Zn | 14.63300379 | 15.71834472 | 41.57866465 |
| O  | 14.65877409 | 15.83336469 | 43.61687504 |
| Zn | 16.35710820 | 15.22589843 | 44.41269672 |
| O  | 16.28496391 | 14.87668204 | 46.26950647 |
| Zn | 17.62464857 | 15.96400909 | 41.76063252 |
| O  | 17.94908386 | 15.85101762 | 43.62109432 |
| Zn | 6.70104122  | 18.87537765 | 41.77323046 |
| O  | 6.41146979  | 18.70738593 | 43.63019678 |
| Zn | 7.93027332  | 17.70478975 | 44.24362626 |
| O  | 8.04030932  | 17.73468234 | 46.28387763 |
| Zn | 9.74944978  | 18.70810180 | 41.58013871 |
| O  | 9.67554173  | 18.68545963 | 43.62841390 |
| Zn | 11.32775694 | 17.79262009 | 44.24029511 |
| O  | 11.34724588 | 17.71077738 | 46.29039540 |

|    |             |             |             |
|----|-------------|-------------|-------------|
| Zn | 12.99848826 | 18.66530325 | 41.55851528 |
| O  | 12.99938661 | 18.69192663 | 43.63048360 |
| Zn | 14.67066846 | 17.79060691 | 44.24060427 |
| O  | 14.65090663 | 17.70376070 | 46.29003955 |
| Zn | 16.24683570 | 18.70886579 | 41.58106149 |
| O  | 16.32222575 | 18.68609041 | 43.62940912 |
| Zn | 18.06895108 | 17.70193890 | 44.24278849 |
| O  | 17.95790573 | 17.72485612 | 46.28210163 |
| Zn | 19.29419405 | 18.87718932 | 41.77318313 |
| O  | 19.58443465 | 18.71031864 | 43.63013558 |
| Zn | 5.01330092  | 21.77775401 | 41.76140694 |
| O  | 4.75323444  | 21.55355468 | 43.62185039 |
| Zn | 6.29614896  | 20.52390433 | 44.24322081 |
| O  | 6.37154448  | 20.60902269 | 46.28240296 |
| Zn | 8.07893376  | 21.59904336 | 41.58156171 |
| O  | 8.02191171  | 21.54449033 | 43.62978612 |
| Zn | 9.66631512  | 20.58744436 | 44.21974899 |
| O  | 9.68355406  | 20.59884133 | 46.29308412 |
| Zn | 11.34716507 | 21.55896216 | 41.56967669 |
| O  | 11.33701992 | 21.55220689 | 43.63912390 |
| Zn | 12.99781390 | 20.60603326 | 44.23040583 |
| O  | 12.99781658 | 20.58782271 | 46.30410711 |
| Zn | 14.64737207 | 21.55968788 | 41.56965616 |
| O  | 14.65781921 | 21.55349965 | 43.63911468 |
| Zn | 16.32835079 | 20.58846052 | 44.21970275 |
| O  | 16.31039639 | 20.59854457 | 46.29305472 |
| Zn | 17.91481127 | 21.60123183 | 41.58057274 |
| O  | 17.97096274 | 21.54789033 | 43.62875396 |
| Zn | 19.69295515 | 20.52681223 | 44.24393711 |
| O  | 19.61207925 | 20.60748284 | 46.28411009 |
| Zn | 20.97923515 | 21.78073503 | 41.76627455 |
| O  | 21.23752411 | 21.55822840 | 43.62763464 |
| Zn | 5.00799856  | 23.24472297 | 44.41363972 |
| O  | 4.74188514  | 23.48176667 | 46.27046265 |
| Zn | 6.29631199  | 24.49174317 | 41.57924656 |
| O  | 6.38327585  | 24.41154324 | 43.61743266 |
| Zn | 8.07222804  | 23.42238301 | 44.24134677 |
| O  | 8.00694045  | 23.48363660 | 46.29049976 |
| Zn | 9.66542497  | 24.43423645 | 41.55892960 |
| O  | 9.68824001  | 24.41947202 | 43.63079176 |
| Zn | 11.34667780 | 23.46341165 | 44.23052649 |
| O  | 11.33054950 | 23.47331215 | 46.30419748 |
| Zn | 12.99662862 | 24.41760372 | 41.56959844 |
| O  | 12.99628715 | 24.42902688 | 43.63908367 |
| Zn | 14.64658310 | 23.46476998 | 44.23049465 |
| O  | 14.66270557 | 23.47460927 | 46.30418066 |
| Zn | 16.32727881 | 24.43667016 | 41.55887877 |

|    |             |             |             |
|----|-------------|-------------|-------------|
| O  | 16.30353786 | 24.42343633 | 43.63075666 |
| Zn | 17.91799033 | 23.42506624 | 44.24092530 |
| O  | 17.97910414 | 23.48352743 | 46.29073552 |
| Zn | 19.69600469 | 24.49528668 | 41.58249496 |
| O  | 19.60782292 | 24.41804502 | 43.62219312 |
| Zn | 20.98208557 | 23.24997993 | 44.41784521 |
| O  | 21.24330748 | 23.48181387 | 46.27765576 |
| Zn | 6.69453569  | 26.14401951 | 44.41530251 |
| O  | 6.39888997  | 26.31454167 | 46.27148111 |
| Zn | 7.92978660  | 27.32198290 | 41.58221937 |
| O  | 8.04076789  | 27.28416524 | 43.62199745 |
| Zn | 9.74543927  | 26.31680712 | 44.24059505 |
| O  | 9.66471082  | 26.34135642 | 46.29053324 |
| Zn | 11.32695572 | 27.22657141 | 41.57995517 |
| O  | 11.34459837 | 27.30160578 | 43.62838520 |
| Zn | 12.99647569 | 26.35829726 | 44.21932142 |
| O  | 12.99720139 | 26.33831121 | 46.29277179 |
| Zn | 14.66546765 | 27.22802984 | 41.58088081 |
| O  | 14.64718946 | 27.30440146 | 43.62937747 |
| Zn | 16.24830218 | 26.32150521 | 44.24081887 |
| O  | 16.33350210 | 26.34824125 | 46.29013933 |
| Zn | 18.06213111 | 27.32531704 | 41.57874797 |
| O  | 17.94920947 | 27.29005725 | 43.61705121 |
| Zn | 19.29380978 | 26.15412595 | 44.41510039 |
| O  | 19.58911882 | 26.32530577 | 46.27127268 |
| Zn | 8.36562808  | 29.05855507 | 44.41735920 |
| O  | 8.03407202  | 29.16891460 | 46.27713567 |
| Zn | 9.63891714  | 29.79044352 | 41.76555441 |
| O  | 9.70275642  | 30.12561985 | 43.62685152 |
| Zn | 11.36795210 | 29.30347209 | 44.24368523 |
| O  | 11.33885635 | 29.19367405 | 46.28390231 |
| Zn | 12.99601200 | 29.78359152 | 41.77293462 |
| O  | 12.99538660 | 30.11780594 | 43.62992648 |
| Zn | 14.62618789 | 29.30930297 | 44.24289047 |
| O  | 14.66182732 | 29.20202218 | 46.28216616 |
| Zn | 16.35341968 | 29.79336200 | 41.76067162 |
| O  | 16.28905964 | 30.13090772 | 43.62108191 |
| Zn | 17.62609350 | 29.06467254 | 44.41299701 |
| O  | 17.96456527 | 29.17671264 | 46.26982254 |
| Zn | 8.37334883  | 15.94983103 | 47.05909985 |
| O  | 8.05397756  | 15.82799311 | 48.92005348 |
| Zn | 9.64397876  | 15.19994465 | 49.71125653 |
| O  | 9.69425468  | 14.83384542 | 51.56604306 |
| Zn | 11.38029158 | 15.69756651 | 46.90198992 |
| O  | 11.36149556 | 15.79828887 | 48.94453035 |
| Zn | 13.00586855 | 15.21811593 | 49.78998602 |
| O  | 12.99508810 | 14.88282707 | 51.65310876 |



|    |             |             |             |
|----|-------------|-------------|-------------|
| Zn | 14.62703578 | 15.68860087 | 46.91548493 |
| O  | 14.66219279 | 15.78863956 | 48.96118132 |
| Zn | 16.38257850 | 15.20483861 | 49.76247794 |
| O  | 16.32738614 | 14.86749896 | 51.62230181 |
| Zn | 17.62111803 | 15.93787638 | 47.06151953 |
| O  | 17.94982427 | 15.81857439 | 48.91826483 |
| Zn | 6.69366878  | 18.87553700 | 47.07514412 |
| O  | 6.41364927  | 18.70904775 | 48.93788285 |
| Zn | 7.91490115  | 17.67254842 | 49.53813387 |
| O  | 8.00936833  | 17.67974603 | 51.58046831 |
| Zn | 9.75028296  | 18.69694521 | 46.89768145 |
| O  | 9.67922957  | 18.66672124 | 48.95227347 |
| Zn | 11.32537706 | 17.75137479 | 49.55271642 |
| O  | 11.33510855 | 17.64583333 | 51.62278278 |
| Zn | 13.00178947 | 18.64895858 | 46.87652141 |
| O  | 13.00573075 | 18.66069072 | 48.95898196 |
| Zn | 14.68951730 | 17.74978278 | 49.55294560 |
| O  | 14.68405163 | 17.65399452 | 51.61830530 |
| Zn | 16.24895155 | 18.69249201 | 46.88907772 |
| O  | 16.32743187 | 18.66408739 | 48.93771834 |
| Zn | 18.08437642 | 17.66387848 | 49.53081523 |
| O  | 17.98427417 | 17.66224670 | 51.56621286 |
| Zn | 19.29779546 | 18.87077692 | 47.07517901 |
| O  | 19.58207866 | 18.71137906 | 48.93789976 |
| Zn | 4.99271052  | 21.79393599 | 47.06250942 |
| O  | 4.72502985  | 21.56929002 | 48.91926988 |
| Zn | 6.25566699  | 20.52968312 | 49.53146214 |
| O  | 6.30397739  | 20.61730727 | 51.56669427 |
| Zn | 8.06380536  | 21.60549586 | 46.88955782 |
| O  | 8.00044156  | 21.55085719 | 48.93802637 |
| Zn | 9.63494773  | 20.57763696 | 49.50238370 |
| O  | 9.63153754  | 20.58691145 | 51.59275970 |
| Zn | 11.34413106 | 21.55706473 | 46.87968468 |
| O  | 11.32782115 | 21.54743331 | 48.95972597 |
| Zn | 12.99710467 | 20.58518664 | 49.49787689 |
| O  | 12.99233827 | 20.55829467 | 51.59630622 |
| Zn | 14.65051222 | 21.55804028 | 46.87965680 |
| O  | 14.66662551 | 21.54784075 | 48.95972825 |
| Zn | 16.35255233 | 20.56610141 | 49.50237483 |
| O  | 16.34647108 | 20.55926316 | 51.59283479 |
| Zn | 17.92399421 | 21.60763306 | 46.89797672 |
| O  | 17.98523501 | 21.56028448 | 48.95243701 |
| Zn | 19.72860607 | 20.52974536 | 49.53848120 |
| O  | 19.67505423 | 20.60839782 | 51.58058433 |
| Zn | 20.99129178 | 21.78794463 | 47.05964917 |
| O  | 21.25642943 | 21.57267659 | 48.92064637 |
| Zn | 4.97752004  | 23.23353203 | 49.76336380 |

|    |             |             |             |
|----|-------------|-------------|-------------|
| O  | 4.71302150  | 23.45029519 | 51.62313006 |
| Zn | 6.27382173  | 24.51207589 | 46.91621509 |
| O  | 6.34334582  | 24.43102982 | 48.96175608 |
| Zn | 8.02773794  | 23.42613542 | 49.55391531 |
| O  | 7.94746138  | 23.47940773 | 51.61894096 |
| Zn | 9.64968656  | 24.43969002 | 46.87725059 |
| O  | 9.65820685  | 24.42963436 | 48.95955057 |
| Zn | 11.32913004 | 23.47451246 | 49.49803579 |
| O  | 11.30803500 | 23.49202492 | 51.59651930 |
| Zn | 12.99641681 | 24.42132417 | 46.87966153 |
| O  | 12.99672070 | 24.43967019 | 48.95973594 |
| Zn | 14.66477796 | 23.47459409 | 49.49792982 |
| O  | 14.69049711 | 23.48421059 | 51.59637199 |
| Zn | 16.33962523 | 24.44777560 | 46.87712133 |
| O  | 16.32725022 | 24.44446649 | 48.95942569 |
| Zn | 17.95470579 | 23.44334326 | 49.55338316 |
| O  | 18.04111354 | 23.50517899 | 51.62322056 |
| Zn | 19.70612916 | 24.51881809 | 46.90234679 |
| O  | 19.62785487 | 24.45142852 | 48.94475991 |
| Zn | 21.00510992 | 23.26387081 | 49.71154597 |
| O  | 21.29691068 | 23.49059025 | 51.56629784 |
| Zn | 6.67789638  | 26.15045445 | 49.79064088 |
| O  | 6.39265158  | 26.32785478 | 51.65370679 |
| Zn | 7.90482214  | 27.31933978 | 46.90240724 |
| O  | 8.00188368  | 27.28509421 | 48.94495813 |
| Zn | 9.71118968  | 26.33960302 | 49.55330919 |
| O  | 9.61469901  | 26.38388945 | 51.62327059 |
| Zn | 11.31692214 | 27.23165337 | 46.89759859 |
| O  | 11.32656117 | 27.30804971 | 48.95229901 |
| Zn | 13.00351667 | 26.39067365 | 49.50211205 |
| O  | 13.01286596 | 26.38886253 | 51.59271905 |
| Zn | 14.67845159 | 27.23816649 | 46.88899831 |
| O  | 14.66344388 | 27.31993295 | 48.93773581 |
| Zn | 16.27390471 | 26.35827463 | 49.55330528 |
| O  | 16.35951821 | 26.40159537 | 51.61855433 |
| Zn | 18.09054026 | 27.33491542 | 46.91573847 |
| O  | 17.98611382 | 27.31496996 | 48.96148422 |
| Zn | 19.30780063 | 26.16528002 | 49.79041655 |
| O  | 19.60384643 | 26.32398950 | 51.65345396 |
| Zn | 8.34237530  | 29.07172197 | 49.71173044 |
| O  | 7.99958859  | 29.21117982 | 51.56637375 |
| Zn | 9.62674507  | 29.79758778 | 47.05952541 |
| O  | 9.68082489  | 30.13514032 | 48.92040110 |
| Zn | 11.34753816 | 29.33310466 | 49.53878152 |
| O  | 11.30584902 | 29.24744000 | 51.58089891 |
| Zn | 12.99976649 | 29.79006818 | 47.07555379 |
| O  | 12.99572838 | 30.11521594 | 48.93835784 |

|    |             |             |             |
|----|-------------|-------------|-------------|
| Zn | 14.65155522 | 29.34146996 | 49.53147966 |
| O  | 14.70291968 | 29.25582099 | 51.56673732 |
| Zn | 16.37759012 | 29.80348305 | 47.06206970 |
| O  | 16.31684883 | 30.14765291 | 48.91883082 |
| Zn | 17.63194176 | 29.09687803 | 49.76270233 |
| O  | 17.95180464 | 29.21765471 | 51.62254876 |
| Zn | 8.36325229  | 15.88014212 | 52.37772690 |
| O  | 7.97675351  | 15.78865401 | 54.21886189 |
| Zn | 9.40477242  | 15.31140527 | 55.32767347 |
| O  | 9.43762182  | 15.24431039 | 57.25481569 |
| Zn | 11.32974312 | 15.58615875 | 52.28818848 |
| O  | 11.22317862 | 15.68320599 | 54.38214381 |
| Zn | 12.96654655 | 15.16917052 | 55.10248330 |
| O  | 12.94358266 | 15.03938746 | 57.05074642 |
| Zn | 14.65621785 | 15.60910892 | 52.27903535 |
| O  | 14.69067980 | 15.67463445 | 54.35331555 |
| Zn | 16.47186842 | 15.15643763 | 55.21586628 |
| O  | 16.39902973 | 14.99499721 | 57.13095169 |
| Zn | 17.65405249 | 15.91783202 | 52.46120833 |
| O  | 17.99907787 | 15.79640907 | 54.31744869 |
| Zn | 6.61912562  | 18.84913534 | 52.27070851 |
| O  | 6.23829589  | 18.64034910 | 54.10358035 |
| Zn | 7.72935161  | 17.64801450 | 54.74304654 |
| O  | 8.09369828  | 17.87654355 | 56.65250315 |
| Zn | 9.71125631  | 18.65351353 | 52.12471775 |
| O  | 9.67158916  | 18.64757729 | 54.19392885 |
| Zn | 11.31932467 | 17.67293933 | 54.64192024 |
| O  | 11.40494338 | 17.73484215 | 56.86084489 |
| Zn | 13.01239084 | 18.58841871 | 52.09649411 |
| O  | 13.04072854 | 18.59306261 | 54.22979289 |
| Zn | 14.76149064 | 17.66026818 | 54.71684524 |
| O  | 14.76228967 | 17.71620397 | 56.90748994 |
| Zn | 16.30951139 | 18.63122321 | 52.17364027 |
| O  | 16.42934513 | 18.59191808 | 54.26672201 |
| Zn | 18.36860280 | 17.58584959 | 54.98085443 |
| O  | 18.27138592 | 17.81376763 | 57.08575110 |
| Zn | 19.35779161 | 18.81957917 | 52.27040609 |
| O  | 19.72828847 | 18.59351237 | 54.10335998 |
| Zn | 4.95897992  | 21.77580992 | 52.46134003 |
| O  | 4.68029878  | 21.53784561 | 54.31756462 |
| Zn | 6.04220915  | 20.32084640 | 54.98167667 |
| O  | 6.28990776  | 20.29034485 | 57.08494917 |
| Zn | 7.98077850  | 21.58330283 | 52.17527769 |
| O  | 7.88658789  | 21.49881130 | 54.26679750 |
| Zn | 9.58499616  | 20.57780764 | 54.57108742 |
| O  | 9.66535999  | 20.64743166 | 56.78466341 |
| Zn | 11.31626249 | 21.54640104 | 52.05326209 |

|    |             |             |             |
|----|-------------|-------------|-------------|
| O  | 11.31119895 | 21.54459204 | 54.18548290 |
| Zn | 12.99005638 | 20.54870512 | 54.53824516 |
| O  | 12.97978523 | 20.58085117 | 56.77085828 |
| Zn | 14.67301246 | 21.53855398 | 52.05305582 |
| O  | 14.67682175 | 21.53526492 | 54.18514472 |
| Zn | 16.37695071 | 20.52352766 | 54.57062394 |
| O  | 16.27638152 | 20.55794216 | 56.78380110 |
| Zn | 17.98094527 | 21.59515142 | 52.12570103 |
| O  | 18.00583865 | 21.56338412 | 54.19424838 |
| Zn | 19.84404156 | 20.38055577 | 54.74304455 |
| O  | 19.46299901 | 20.58249815 | 56.65206879 |
| Zn | 21.05657166 | 21.81469939 | 52.37787256 |
| O  | 21.32997001 | 21.52543849 | 54.21882281 |
| Zn | 4.89068083  | 23.17973903 | 55.21668290 |
| O  | 4.78705322  | 23.32458628 | 57.13159338 |
| Zn | 6.19120282  | 24.52628604 | 52.28002748 |
| O  | 6.22998331  | 24.46327188 | 54.35430259 |
| Zn | 7.91404121  | 23.40857466 | 54.71820050 |
| O  | 7.96230776  | 23.37880599 | 56.90789071 |
| Zn | 9.59241391  | 24.46013071 | 52.09713363 |
| O  | 9.58189565  | 24.43300517 | 54.23029552 |
| Zn | 11.30071044 | 23.49882661 | 54.53806701 |
| O  | 11.33420747 | 23.49097207 | 56.77089289 |
| Zn | 13.00148466 | 24.45011906 | 52.05327986 |
| O  | 13.00249084 | 24.45489106 | 54.18529956 |
| Zn | 14.70017063 | 23.48711073 | 54.53804843 |
| O  | 14.67722301 | 23.46165279 | 56.77070782 |
| Zn | 16.38620261 | 24.48679109 | 52.09685596 |
| O  | 16.36850421 | 24.50869136 | 54.22992473 |
| Zn | 18.02594168 | 23.47795673 | 54.64187323 |
| O  | 17.92914046 | 23.52044717 | 56.86046789 |
| Zn | 19.82736513 | 24.53026818 | 52.28895449 |
| O  | 19.79738814 | 24.38909202 | 54.38289483 |
| Zn | 21.02775892 | 22.99980252 | 55.32845489 |
| O  | 21.06906287 | 23.06267668 | 57.25573938 |
| Zn | 6.65452729  | 26.20897101 | 55.10331245 |
| O  | 6.55332016  | 26.29329020 | 57.05146465 |
| Zn | 7.83406434  | 27.41872956 | 52.28890881 |
| O  | 7.97088946  | 27.46244601 | 54.38313783 |
| Zn | 9.64559277  | 26.38383251 | 54.64239291 |
| O  | 9.65721330  | 26.27777946 | 56.86111966 |
| Zn | 11.29890701 | 27.28680660 | 52.12557129 |
| O  | 11.31357803 | 27.32375549 | 54.19450247 |
| Zn | 13.02838439 | 26.43309322 | 54.57098966 |
| O  | 13.04883712 | 26.32818706 | 56.78426351 |
| Zn | 14.70070237 | 27.32077275 | 52.17463113 |
| O  | 14.67523577 | 27.44384866 | 54.26709397 |

|    |             |             |             |
|----|-------------|-------------|-------------|
| Zn | 16.31572621 | 26.46513677 | 54.71760351 |
| O  | 16.26662987 | 26.43788667 | 56.90775023 |
| Zn | 18.14426043 | 27.39939407 | 52.27913010 |
| O  | 18.07082091 | 27.39655744 | 54.35352242 |
| Zn | 19.37041710 | 26.15623554 | 55.10239982 |
| O  | 19.49447589 | 26.20181235 | 57.05064940 |
| Zn | 8.55874863  | 29.22196100 | 55.32980103 |
| O  | 8.48383586  | 29.22671667 | 57.25711144 |
| Zn | 9.57057368  | 29.84072553 | 52.37915456 |
| O  | 9.68472624  | 30.22083983 | 54.22024739 |
| Zn | 11.41913296 | 29.50573041 | 54.74378090 |
| O  | 11.43435381 | 29.07549403 | 56.65312076 |
| Zn | 13.01379045 | 29.86687758 | 52.27042268 |
| O  | 13.02391950 | 30.30039270 | 54.10355535 |
| Zn | 14.57712701 | 29.62832138 | 54.98070629 |
| O  | 14.42702489 | 29.42894804 | 57.08487880 |
| Zn | 16.37890465 | 29.84166061 | 52.46125457 |
| O  | 16.31201530 | 30.20113713 | 54.31764288 |
| Zn | 17.62951240 | 29.19802827 | 55.21595132 |
| O  | 17.80579788 | 29.21598921 | 57.13111515 |
| Zn | 7.94918162  | 16.31712282 | 57.98759301 |
| Zn | 11.24235578 | 15.76330442 | 57.40353902 |
| Zn | 14.67334809 | 15.73099926 | 57.41302937 |
| Zn | 17.84480622 | 16.02733809 | 57.88431562 |
| Zn | 6.60786062  | 18.44765035 | 57.90339729 |
| Zn | 9.76319087  | 18.71398847 | 56.84536692 |
| Zn | 13.08670292 | 18.64055370 | 56.98581905 |
| Zn | 16.48704672 | 18.62356096 | 57.02975205 |
| Zn | 19.70526207 | 19.01156535 | 57.90710511 |
| Zn | 4.96519026  | 21.55892538 | 57.88952071 |
| Zn | 7.88438280  | 21.43071580 | 57.03042270 |
| Zn | 11.32896088 | 21.57017628 | 56.89500395 |
| Zn | 14.64560411 | 21.53740722 | 56.89475433 |
| Zn | 17.90219272 | 21.60888179 | 56.84374997 |
| Zn | 20.88141806 | 21.23900078 | 57.99094462 |
| Zn | 6.28865268  | 24.44922657 | 57.41380864 |
| Zn | 9.60043831  | 24.36847896 | 56.98570927 |
| Zn | 13.01618938 | 24.42617206 | 56.89513041 |
| Zn | 16.30417693 | 24.52440032 | 56.98552439 |
| Zn | 19.71747439 | 24.36670577 | 57.40332187 |
| Zn | 8.03093458  | 27.40420167 | 57.40443146 |
| Zn | 11.32573721 | 27.21071324 | 56.84493894 |
| Zn | 14.61832069 | 27.47831310 | 57.02919039 |
| Zn | 18.03040922 | 27.35338021 | 57.41322382 |
| Zn | 10.15717862 | 29.97680159 | 57.99160818 |
| Zn | 12.67319294 | 30.07341550 | 57.90594325 |
| Zn | 16.18742046 | 29.94863767 | 57.88428568 |

**WZ-516**

|    |             |             |            |
|----|-------------|-------------|------------|
| O  | 11.31603711 | 11.83738542 | 5.28230727 |
| O  | 17.98433259 | 11.83753485 | 4.35188207 |
| O  | 6.25097463  | 15.12723167 | 4.09977528 |
| O  | 9.61689063  | 14.79603180 | 4.30114794 |
| O  | 12.99030092 | 14.82639381 | 4.32784554 |
| O  | 16.23304950 | 14.79028414 | 4.41369563 |
| O  | 19.64457136 | 14.79352463 | 4.27259376 |
| O  | 8.03790171  | 17.74571663 | 4.37872901 |
| O  | 14.66539634 | 17.69263619 | 4.42298085 |
| O  | 21.31028964 | 17.71401459 | 4.26152581 |
| O  | 3.21077086  | 20.38134003 | 4.11896694 |
| O  | 6.37505407  | 20.62456713 | 4.38958947 |
| O  | 9.73423065  | 20.64309389 | 4.46298717 |
| O  | 12.99321867 | 20.63873357 | 4.46407816 |
| O  | 16.36992707 | 20.65243257 | 4.45401246 |
| O  | 19.61179576 | 20.62979303 | 4.39246235 |
| O  | 22.97490206 | 20.58552002 | 4.30141874 |
| O  | 4.60193310  | 23.45986931 | 4.32919578 |
| O  | 11.35851394 | 23.46065775 | 4.46885565 |
| O  | 18.10025814 | 23.51528805 | 4.47349203 |
| O  | 24.60683452 | 23.56486611 | 4.25618202 |
| O  | 2.89142241  | 26.40505704 | 5.32627720 |
| O  | 6.31535720  | 26.36316680 | 4.36029090 |
| O  | 9.64051230  | 26.37949142 | 4.44384369 |
| O  | 13.05975162 | 26.37495670 | 4.46293767 |
| O  | 16.41152878 | 26.43623674 | 4.47714356 |
| O  | 19.87732583 | 26.48623055 | 4.51250664 |
| O  | 23.23346311 | 26.58798634 | 5.60942562 |
| O  | 7.90898147  | 29.18495621 | 4.44336779 |
| O  | 14.66341123 | 29.18596674 | 4.39933753 |
| O  | 21.64838864 | 29.33529185 | 5.60756828 |
| O  | 6.22636293  | 32.18053131 | 4.39856555 |
| O  | 9.61996052  | 32.13673363 | 4.30137351 |
| O  | 12.98564333 | 32.11558118 | 4.27750493 |
| O  | 16.30927762 | 32.11891668 | 4.30574767 |
| O  | 19.70563607 | 32.02696478 | 4.24976619 |
| Zn | 6.07989029  | 13.80223823 | 5.30464423 |
| O  | 6.16121622  | 12.99692075 | 6.90634834 |
| Zn | 7.79048595  | 12.43971064 | 7.69518058 |
| O  | 7.97204244  | 12.06973216 | 9.53136539 |
| Zn | 9.89693098  | 13.07226660 | 5.02446266 |
| O  | 9.46300954  | 13.04259165 | 6.95728689 |
| Zn | 11.30450581 | 12.14085279 | 7.35221062 |
| O  | 11.31885912 | 12.09269685 | 9.27247555 |

|    |             |             |            |
|----|-------------|-------------|------------|
| Zn | 12.72221096 | 13.09261320 | 5.02733575 |
| O  | 13.13698070 | 13.06016996 | 6.96555992 |
| Zn | 14.72936893 | 12.38648727 | 7.79194451 |
| O  | 14.61871457 | 12.03880120 | 9.62576395 |
| Zn | 16.62817075 | 12.98109758 | 4.85166636 |
| O  | 16.32962149 | 12.93127009 | 6.87021803 |
| Zn | 18.05809369 | 12.34703266 | 7.66669139 |
| O  | 17.92167643 | 12.04814393 | 9.52320792 |
| Zn | 19.35611004 | 12.97203000 | 4.92317079 |
| O  | 19.62757401 | 12.96945340 | 6.83858763 |
| Zn | 5.10916917  | 16.51444025 | 4.88528468 |
| O  | 4.82895725  | 15.92603497 | 6.73111153 |
| Zn | 6.24901423  | 15.00396388 | 7.64121306 |
| O  | 6.36169658  | 14.90449645 | 9.60711053 |
| Zn | 8.04407595  | 15.85488992 | 4.77461189 |
| O  | 7.97736799  | 15.82222025 | 6.91042581 |
| Zn | 9.61184123  | 14.95432177 | 7.59226874 |
| O  | 9.67807096  | 14.88384103 | 9.59081030 |
| Zn | 11.29841098 | 15.45082063 | 4.93529148 |
| O  | 11.30952479 | 15.85119842 | 6.89024744 |
| Zn | 12.99700582 | 14.96085712 | 7.61071953 |
| O  | 12.97229319 | 14.89495785 | 9.60200289 |
| Zn | 14.62762425 | 15.78247654 | 4.87332777 |
| O  | 14.64471754 | 15.85216607 | 6.96598705 |
| Zn | 16.30454001 | 14.92306562 | 7.52538650 |
| O  | 16.28663780 | 14.85070887 | 9.55085270 |
| Zn | 17.95569774 | 15.38045320 | 4.94754771 |
| O  | 17.97370312 | 15.82009577 | 6.88924249 |
| Zn | 19.77576186 | 14.79732748 | 7.51793151 |
| O  | 19.59012521 | 14.86279016 | 9.53847614 |
| Zn | 20.92140406 | 15.99868404 | 5.01634267 |
| O  | 21.23769180 | 15.84999075 | 6.89453897 |
| Zn | 3.84721021  | 18.69563602 | 4.89327863 |
| O  | 3.20070589  | 18.74169654 | 6.74131996 |
| Zn | 4.65377638  | 17.70022387 | 7.52053158 |
| O  | 4.74047504  | 17.74765922 | 9.55070650 |
| Zn | 6.41863553  | 18.72821161 | 4.83935625 |
| O  | 6.39597441  | 18.70820074 | 6.95192983 |
| Zn | 7.99421400  | 17.71131580 | 7.53411948 |
| O  | 8.04699338  | 17.73838390 | 9.58496526 |
| Zn | 9.38617123  | 18.86882094 | 5.01184865 |
| O  | 9.69776373  | 18.69218213 | 6.97603443 |
| Zn | 11.33660836 | 17.74396439 | 7.58516101 |
| O  | 11.34166613 | 17.73916957 | 9.59819761 |
| Zn | 13.29038681 | 18.85171881 | 5.01380072 |
| O  | 12.99183084 | 18.69403545 | 6.98018796 |
| Zn | 14.66856923 | 17.71990150 | 7.60460197 |

|    |             |             |            |
|----|-------------|-------------|------------|
| O  | 14.64479859 | 17.73430084 | 9.61686235 |
| Zn | 16.05158355 | 18.85949125 | 4.99735449 |
| O  | 16.32471667 | 18.68974331 | 6.96662966 |
| Zn | 17.99903069 | 17.70317931 | 7.52962583 |
| O  | 17.93634965 | 17.72673424 | 9.56370325 |
| Zn | 19.94503042 | 18.85334191 | 4.96283874 |
| O  | 19.60747595 | 18.67670448 | 6.91045878 |
| Zn | 21.37968714 | 17.65192808 | 7.53625559 |
| O  | 21.22259134 | 17.74508242 | 9.55507907 |
| Zn | 22.73913463 | 18.80006466 | 5.00743011 |
| O  | 22.88992732 | 18.67172052 | 6.90298649 |
| Zn | 1.98167330  | 20.88705664 | 5.33157903 |
| O  | 1.32894803  | 21.35514038 | 6.93674510 |
| Zn | 3.11385195  | 20.42600758 | 7.66337473 |
| O  | 3.08697787  | 20.56986028 | 9.63026627 |
| Zn | 4.73854860  | 21.56715027 | 4.79545620 |
| O  | 4.68345218  | 21.51825913 | 6.93182672 |
| Zn | 6.33194333  | 20.58706846 | 7.54370209 |
| O  | 6.38360121  | 20.61589653 | 9.59556533 |
| Zn | 8.02517731  | 21.22592663 | 5.01871962 |
| O  | 8.03195227  | 21.57340382 | 6.98543146 |
| Zn | 9.70146608  | 20.61403586 | 7.61974452 |
| O  | 9.68634375  | 20.60392555 | 9.63853631 |
| Zn | 11.35801173 | 21.57498498 | 4.95923354 |
| O  | 11.34769277 | 21.56447091 | 7.05256421 |
| Zn | 12.98322977 | 20.61830328 | 7.63561141 |
| O  | 13.00059050 | 20.59914898 | 9.64925268 |
| Zn | 14.68172469 | 21.26367832 | 5.04248946 |
| O  | 14.66339369 | 21.57695399 | 7.01044449 |
| Zn | 16.35411114 | 20.60710873 | 7.61917321 |
| O  | 16.29893658 | 20.59461774 | 9.63478510 |
| Zn | 18.01769734 | 21.60633944 | 4.92505243 |
| O  | 17.97631342 | 21.55235341 | 7.01748676 |
| Zn | 19.63104227 | 20.58395557 | 7.56489440 |
| O  | 19.60727769 | 20.59705346 | 9.59844258 |
| Zn | 21.30888481 | 21.22062899 | 4.99101031 |
| O  | 21.29366902 | 21.53873286 | 6.94801378 |
| Zn | 23.05835333 | 20.47584743 | 7.52602237 |
| O  | 22.92679149 | 20.58239129 | 9.55846849 |
| Zn | 24.18899554 | 21.91646596 | 4.93886444 |
| O  | 24.56217101 | 21.50367602 | 6.79778486 |
| Zn | 1.66125371  | 23.04059364 | 7.73331680 |
| O  | 1.43511095  | 23.37853545 | 9.57122172 |
| Zn | 3.25095479  | 24.55926088 | 5.06224396 |
| O  | 3.01622463  | 24.19234201 | 6.99523983 |
| Zn | 4.74904593  | 23.36387782 | 7.62173746 |
| O  | 4.72426319  | 23.45299645 | 9.62150853 |



|    |             |             |            |
|----|-------------|-------------|------------|
| Zn | 6.01259589  | 24.58394389 | 4.96421564 |
| O  | 6.37288415  | 24.38688220 | 6.91699617 |
| Zn | 8.02993857  | 23.46312204 | 7.60206978 |
| O  | 8.02976128  | 23.46770020 | 9.61586272 |
| Zn | 9.96006827  | 24.60684877 | 5.02736648 |
| O  | 9.67941534  | 24.42181397 | 6.99433197 |
| Zn | 11.34542416 | 23.45104321 | 7.64156898 |
| O  | 11.33864714 | 23.47411491 | 9.65536880 |
| Zn | 12.74682648 | 24.60566897 | 5.04834153 |
| O  | 13.01595642 | 24.42628573 | 7.01461758 |
| Zn | 14.66987558 | 23.47971605 | 7.63322814 |
| O  | 14.65261446 | 23.46854809 | 9.64536999 |
| Zn | 16.69822694 | 24.65218753 | 5.04469780 |
| O  | 16.31060815 | 24.42539221 | 6.98632993 |
| Zn | 17.97858067 | 23.42672410 | 7.62429633 |
| O  | 17.95370919 | 23.45962740 | 9.64025514 |
| Zn | 19.49246722 | 24.68845406 | 5.04038384 |
| O  | 19.63899499 | 24.40000115 | 7.01017522 |
| Zn | 21.30100622 | 23.42885972 | 7.58759827 |
| O  | 21.27238254 | 23.45323524 | 9.61131215 |
| Zn | 23.77824238 | 24.90825230 | 5.11140926 |
| O  | 23.01718669 | 24.25392372 | 7.00994808 |
| Zn | 24.35811163 | 23.07265950 | 7.79572031 |
| O  | 24.56074384 | 23.40112901 | 9.63209203 |
| Zn | 3.15479343  | 26.23587897 | 7.39517227 |
| O  | 3.12290126  | 26.26831916 | 9.31622445 |
| Zn | 4.68121313  | 26.99415490 | 5.06670732 |
| O  | 4.86739076  | 27.36115511 | 7.00637619 |
| Zn | 6.44765412  | 26.29052640 | 7.64132157 |
| O  | 6.38032079  | 26.29913507 | 9.63380814 |
| Zn | 7.96654397  | 27.29790526 | 4.89989575 |
| O  | 8.04153306  | 27.27228373 | 6.99296107 |
| Zn | 9.67525936  | 26.35895452 | 7.62126648 |
| O  | 9.67717378  | 26.32874671 | 9.63501532 |
| Zn | 11.34831001 | 26.99297023 | 5.01003046 |
| O  | 11.34275852 | 27.30742762 | 6.98157690 |
| Zn | 13.02161501 | 26.37366532 | 7.62562554 |
| O  | 12.98434039 | 26.32998582 | 9.64188645 |
| Zn | 14.71595263 | 27.31662543 | 4.93020288 |
| O  | 14.65240625 | 27.30325791 | 7.02299714 |
| Zn | 16.27943967 | 26.36733479 | 7.62475803 |
| O  | 16.29638724 | 26.32782741 | 9.64119852 |
| Zn | 18.12767886 | 27.05042399 | 5.03923842 |
| O  | 17.95373577 | 27.31526071 | 7.01104842 |
| Zn | 19.52535007 | 26.27818781 | 7.75475605 |
| O  | 19.56134416 | 26.29773373 | 9.73807115 |
| Zn | 21.47277938 | 27.40272012 | 5.25207003 |

|    |             |             |             |
|----|-------------|-------------|-------------|
| O  | 21.14078656 | 27.21013466 | 7.29376073  |
| Zn | 22.84125717 | 26.20996783 | 7.52682099  |
| O  | 22.88269956 | 26.27396243 | 9.44224160  |
| Zn | 5.08301567  | 29.07724346 | 7.83101516  |
| O  | 4.72869956  | 29.15117802 | 9.66641288  |
| Zn | 6.54153522  | 30.43171001 | 4.88515749  |
| O  | 6.35241650  | 30.19025130 | 6.90590745  |
| Zn | 8.06732057  | 29.17390450 | 7.55186578  |
| O  | 7.99931096  | 29.19095348 | 9.57929901  |
| Zn | 9.28376056  | 30.38012373 | 4.97319221  |
| O  | 9.67896120  | 30.17033817 | 6.91407563  |
| Zn | 11.32657241 | 29.25012707 | 7.54308840  |
| O  | 11.31776503 | 29.18159514 | 9.57863748  |
| Zn | 13.29291529 | 30.36168972 | 4.97293880  |
| O  | 12.97420349 | 30.15432779 | 6.92155767  |
| Zn | 14.64175303 | 29.22055400 | 7.56753293  |
| O  | 14.64263337 | 29.19153924 | 9.60204873  |
| Zn | 16.02765165 | 30.35775120 | 4.99316747  |
| O  | 16.30084695 | 30.18058946 | 6.94973053  |
| Zn | 17.94317000 | 29.24003455 | 7.58501601  |
| O  | 17.95221006 | 29.20189787 | 9.60939355  |
| Zn | 20.46131065 | 30.64250334 | 5.10774422  |
| O  | 19.51748767 | 30.31030183 | 7.00868102  |
| Zn | 21.12611552 | 29.18267751 | 7.52506833  |
| O  | 21.20440226 | 29.18323954 | 9.44063689  |
| Zn | 6.71243763  | 31.98039174 | 7.69813612  |
| O  | 6.38852919  | 32.00785669 | 9.55732697  |
| Zn | 7.90016159  | 32.79824138 | 4.95870387  |
| O  | 8.03764681  | 33.03142378 | 6.87569009  |
| Zn | 9.69738723  | 32.24246131 | 7.54047850  |
| O  | 9.66391779  | 32.04562560 | 9.56269951  |
| Zn | 11.30732971 | 32.63562712 | 5.03639338  |
| O  | 11.34051502 | 32.98029523 | 6.91621539  |
| Zn | 12.97627652 | 32.20140569 | 7.54561154  |
| O  | 12.97969597 | 32.01733045 | 9.56566274  |
| Zn | 14.64648140 | 32.80639174 | 5.01512511  |
| O  | 14.61476437 | 32.99738199 | 6.91208103  |
| Zn | 16.26589016 | 32.24116217 | 7.52462697  |
| O  | 16.29321772 | 32.07220137 | 9.55803539  |
| Zn | 18.07392939 | 32.49781992 | 4.93805185  |
| O  | 17.90770841 | 33.02811688 | 6.79803075  |
| Zn | 19.16737588 | 32.06362806 | 7.79012637  |
| O  | 19.55602079 | 32.07472392 | 9.62715566  |
| Zn | 6.70527455  | 13.11852442 | 10.43451543 |
| O  | 6.38570902  | 13.01307113 | 12.27493296 |
| Zn | 8.01853715  | 12.39714142 | 13.01844552 |
| O  | 8.07039224  | 12.05405648 | 14.86818772 |

|    |             |             |             |
|----|-------------|-------------|-------------|
| Zn | 9.72642512  | 12.82404038 | 10.05553123 |
| O  | 9.68570746  | 12.96350411 | 12.12218894 |
| Zn | 11.31749853 | 12.40692588 | 13.01156124 |
| O  | 11.35081461 | 12.07912450 | 14.85396204 |
| Zn | 12.90761026 | 12.84995997 | 10.08010431 |
| O  | 12.94900986 | 12.99670598 | 12.13218857 |
| Zn | 14.60067314 | 12.40799715 | 12.97872559 |
| O  | 14.60826683 | 12.08633214 | 14.83070092 |
| Zn | 16.26379544 | 12.85118429 | 10.21102047 |
| O  | 16.29397585 | 12.98296684 | 12.21988440 |
| Zn | 17.98761683 | 12.38260977 | 13.05134276 |
| O  | 17.91020381 | 12.03935624 | 14.89589752 |
| Zn | 19.23706149 | 13.09914449 | 10.37380270 |
| O  | 19.56687679 | 12.99897953 | 12.22090123 |
| Zn | 5.04570952  | 16.05228211 | 10.45550255 |
| O  | 4.75691070  | 15.87813247 | 12.28991785 |
| Zn | 6.26363856  | 14.85932666 | 12.92091254 |
| O  | 6.39856789  | 14.88759066 | 14.92549845 |
| Zn | 8.09983826  | 15.85757823 | 10.25114234 |
| O  | 8.00853601  | 15.82956049 | 12.25667417 |
| Zn | 9.66223165  | 14.91814852 | 12.85404193 |
| O  | 9.69326128  | 14.85742826 | 14.87453073 |
| Zn | 11.33027007 | 15.81178969 | 10.21478576 |
| O  | 11.31898876 | 15.84804075 | 12.24150354 |
| Zn | 12.98282676 | 14.94324464 | 12.85124581 |
| O  | 12.98572516 | 14.88493203 | 14.86459674 |
| Zn | 14.64304951 | 15.79119705 | 10.19763632 |
| O  | 14.64742916 | 15.83745555 | 12.23028165 |
| Zn | 16.31531226 | 14.93829847 | 12.87374245 |
| O  | 16.28220987 | 14.86286818 | 14.88721468 |
| Zn | 17.88028685 | 15.82661310 | 10.19685917 |
| O  | 17.95674827 | 15.82505215 | 12.21682225 |
| Zn | 19.70372349 | 14.84609317 | 12.87400033 |
| O  | 19.57668826 | 14.87567382 | 14.89005181 |
| Zn | 20.90614911 | 16.00869282 | 10.38044101 |
| O  | 21.19864516 | 15.86555374 | 12.22703035 |
| Zn | 3.42827367  | 18.85091559 | 10.46849837 |
| O  | 3.13495072  | 18.68609667 | 12.30331711 |
| Zn | 4.67919830  | 17.70168962 | 12.93839810 |
| O  | 4.78026749  | 17.75797280 | 14.94471553 |
| Zn | 6.45819673  | 18.73671825 | 10.22632645 |
| O  | 6.38587674  | 18.69224659 | 12.24258215 |
| Zn | 8.01594876  | 17.73244417 | 12.87833834 |
| O  | 8.05553838  | 17.74016117 | 14.91041028 |
| Zn | 9.69855337  | 18.69052632 | 10.23481948 |
| O  | 9.67958562  | 18.69007018 | 12.25939838 |
| Zn | 11.32976333 | 17.75036575 | 12.89268685 |

|    |             |             |             |
|----|-------------|-------------|-------------|
| O  | 11.33937993 | 17.73449217 | 14.91380960 |
| Zn | 12.99476321 | 18.67857423 | 10.24557817 |
| O  | 12.98705189 | 18.69039098 | 12.26867834 |
| Zn | 14.64663677 | 17.74224038 | 12.88154186 |
| O  | 14.63768180 | 17.73169107 | 14.90576500 |
| Zn | 16.29258799 | 18.68129156 | 10.23650924 |
| O  | 16.29812846 | 18.68437963 | 12.25831260 |
| Zn | 17.96480580 | 17.71737604 | 12.86328684 |
| O  | 17.92494432 | 17.73132776 | 14.89799652 |
| Zn | 19.53040807 | 18.71575755 | 10.23307400 |
| O  | 19.58615931 | 18.68700097 | 12.24166796 |
| Zn | 21.30976227 | 17.68318964 | 12.88040911 |
| O  | 21.20537437 | 17.74621033 | 14.89981817 |
| Zn | 22.56965187 | 18.87041783 | 10.39615699 |
| O  | 22.83594031 | 18.68816938 | 12.24295480 |
| Zn | 1.71557255  | 21.75461368 | 10.46923893 |
| O  | 1.46651348  | 21.52788984 | 12.31055606 |
| Zn | 3.00741007  | 20.49516947 | 12.94517565 |
| O  | 3.10150662  | 20.59358637 | 14.95289753 |
| Zn | 4.78312502  | 21.59573021 | 10.27305017 |
| O  | 4.71591747  | 21.52718533 | 12.28024652 |
| Zn | 6.37130196  | 20.57803492 | 12.88965776 |
| O  | 6.39742443  | 20.60796888 | 14.92371099 |
| Zn | 8.03667296  | 21.56550111 | 10.24431462 |
| O  | 8.02899827  | 21.54539088 | 12.26990645 |
| Zn | 9.68104507  | 20.59196309 | 12.89414066 |
| O  | 9.68984050  | 20.59821450 | 14.92383237 |
| Zn | 11.34302701 | 21.55669455 | 10.26088062 |
| O  | 11.33768865 | 21.55097083 | 12.28466323 |
| Zn | 12.99294603 | 20.59555112 | 12.90146328 |
| O  | 12.99034707 | 20.59457417 | 14.92861831 |
| Zn | 14.65469819 | 21.55566844 | 10.26502948 |
| O  | 14.64721295 | 21.55008532 | 12.28710023 |
| Zn | 16.30517023 | 20.58556443 | 12.89393025 |
| O  | 16.29144316 | 20.59352222 | 14.92257540 |
| Zn | 17.95544705 | 21.55428201 | 10.24696095 |
| O  | 17.95210576 | 21.54160395 | 12.27039584 |
| Zn | 19.61991179 | 20.57506545 | 12.87187643 |
| O  | 19.58606057 | 20.60336315 | 14.90962000 |
| Zn | 21.23193858 | 21.58267764 | 10.22745085 |
| O  | 21.26809172 | 21.52166536 | 12.24920806 |
| Zn | 22.96989807 | 20.48142495 | 12.91974761 |
| O  | 22.87819812 | 20.58410623 | 14.93091496 |
| Zn | 24.26086030 | 21.73554214 | 10.46329693 |
| O  | 24.51624411 | 21.52168117 | 12.30857209 |
| Zn | 1.74992490  | 23.24529701 | 13.06197262 |
| O  | 1.48283866  | 23.45676743 | 14.91502587 |

|    |             |             |             |
|----|-------------|-------------|-------------|
| Zn | 2.96521595  | 24.52084000 | 10.09413938 |
| O  | 3.06885730  | 24.41076468 | 12.16408842 |
| Zn | 4.75385504  | 23.41119373 | 12.88412720 |
| O  | 4.71827256  | 23.46650552 | 14.90904705 |
| Zn | 6.35671247  | 24.41684959 | 10.24167789 |
| O  | 6.38459964  | 24.38499093 | 12.27056637 |
| Zn | 8.04195922  | 23.44027298 | 12.90889130 |
| O  | 8.03179871  | 23.45777341 | 14.93262857 |
| Zn | 9.67382534  | 24.42519651 | 10.25830896 |
| O  | 9.68212584  | 24.40811806 | 12.28274758 |
| Zn | 11.33922612 | 23.45835110 | 12.90625350 |
| O  | 11.33540816 | 23.45859238 | 14.93428281 |
| Zn | 12.99788553 | 24.42324982 | 10.26832549 |
| O  | 12.99174598 | 24.41492427 | 12.29083031 |
| Zn | 14.64433455 | 23.45693193 | 12.91009364 |
| O  | 14.64288186 | 23.45719977 | 14.93686372 |
| Zn | 16.31674516 | 24.42574670 | 10.26512436 |
| O  | 16.29592202 | 24.41031578 | 12.28887364 |
| Zn | 17.94018335 | 23.43914253 | 12.90721537 |
| O  | 17.94598651 | 23.45524350 | 14.93168013 |
| Zn | 19.63857491 | 24.39611321 | 10.25848661 |
| O  | 19.60024034 | 24.38096464 | 12.28777954 |
| Zn | 21.22757702 | 23.39436120 | 12.88813303 |
| O  | 21.26123485 | 23.45828238 | 14.91051056 |
| Zn | 23.00650035 | 24.50307071 | 10.15911296 |
| O  | 22.90256510 | 24.40392317 | 12.20272904 |
| Zn | 24.24216355 | 23.23658309 | 13.06384120 |
| O  | 24.50488352 | 23.45498167 | 14.91753636 |
| Zn | 3.40557352  | 26.09968062 | 13.05487449 |
| O  | 3.14054193  | 26.29053768 | 14.89988930 |
| Zn | 4.57806063  | 27.26262988 | 10.11685346 |
| O  | 4.72764367  | 27.21945890 | 12.17165217 |
| Zn | 6.43371589  | 26.27619279 | 12.88179627 |
| O  | 6.38461093  | 26.30754518 | 14.89974176 |
| Zn | 7.99522007  | 27.29572986 | 10.22172830 |
| O  | 8.03840667  | 27.27143245 | 12.25693539 |
| Zn | 9.69260255  | 26.31707789 | 12.89553278 |
| O  | 9.67736430  | 26.31528963 | 14.92250970 |
| Zn | 11.32544954 | 27.27870951 | 10.24686213 |
| O  | 11.33273570 | 27.27724523 | 12.27047699 |
| Zn | 12.98738233 | 26.33097217 | 12.89632338 |
| O  | 12.98645683 | 26.31560742 | 14.92605454 |
| Zn | 14.64797065 | 27.28056736 | 10.24778179 |
| O  | 14.63812595 | 27.27920670 | 12.27202735 |
| Zn | 16.27814045 | 26.31831012 | 12.90518928 |
| O  | 16.29506559 | 26.31575833 | 14.92974048 |
| Zn | 17.95294259 | 27.31470589 | 10.25636427 |

|    |             |             |             |
|----|-------------|-------------|-------------|
| O  | 17.92397255 | 27.28401421 | 12.28580414 |
| Zn | 19.55393853 | 26.28908934 | 12.84864193 |
| O  | 19.59363093 | 26.31168181 | 14.87955726 |
| Zn | 21.36323931 | 27.33621342 | 10.03215771 |
| O  | 21.24494216 | 27.26255183 | 12.12995892 |
| Zn | 22.55328305 | 26.13274354 | 13.01557797 |
| O  | 22.82696403 | 26.29401924 | 14.86835097 |
| Zn | 5.04558626  | 28.94404351 | 13.01413005 |
| O  | 4.77161677  | 29.10930814 | 14.86857961 |
| Zn | 6.25784393  | 30.16984659 | 10.24205154 |
| O  | 6.38776736  | 30.12381386 | 12.25314532 |
| Zn | 8.09593747  | 29.16540010 | 12.89456387 |
| O  | 8.01428651  | 29.17426057 | 14.91163011 |
| Zn | 9.64555508  | 30.08163226 | 10.21409939 |
| O  | 9.68359480  | 30.14391053 | 12.23668241 |
| Zn | 11.33155118 | 29.20366069 | 12.86960689 |
| O  | 11.32311654 | 29.16273754 | 14.90677966 |
| Zn | 12.97621174 | 30.06467505 | 10.23757256 |
| O  | 12.98135795 | 30.12294849 | 12.24782800 |
| Zn | 14.63821722 | 29.20651684 | 12.86704354 |
| O  | 14.64675040 | 29.16317040 | 14.90520159 |
| Zn | 16.31283563 | 30.10284226 | 10.22275729 |
| O  | 16.28156874 | 30.16056893 | 12.24532594 |
| Zn | 17.88595014 | 29.18735266 | 12.87888645 |
| O  | 17.96032981 | 29.18476822 | 14.90043893 |
| Zn | 19.73103795 | 30.17642247 | 10.15141685 |
| O  | 19.59815025 | 30.12988564 | 12.19452537 |
| Zn | 20.92180775 | 28.96329300 | 13.00803751 |
| O  | 21.20034794 | 29.11857179 | 14.86054727 |
| Zn | 6.71686258  | 31.89234910 | 13.07625500 |
| O  | 6.38132589  | 31.99540214 | 14.92340684 |
| Zn | 7.96160315  | 32.62112548 | 10.39817075 |
| O  | 8.03961399  | 32.95346505 | 12.24791196 |
| Zn | 9.71213813  | 32.14568272 | 12.88470482 |
| O  | 9.67491455  | 32.02177694 | 14.90373212 |
| Zn | 11.32019472 | 32.61216593 | 10.39232907 |
| O  | 11.34251170 | 32.93241637 | 12.24131750 |
| Zn | 12.97804293 | 32.11731422 | 12.87767561 |
| O  | 12.98231982 | 31.99653237 | 14.89820105 |
| Zn | 14.63380330 | 32.62034127 | 10.39513179 |
| O  | 14.61092636 | 32.93835496 | 12.24375699 |
| Zn | 16.23570172 | 32.15413726 | 12.90699600 |
| O  | 16.28323719 | 32.02441921 | 14.91776586 |
| Zn | 17.96318025 | 32.65061969 | 10.45399011 |
| O  | 17.90920654 | 32.97583642 | 12.30075244 |
| Zn | 19.26135327 | 31.87756057 | 13.04498230 |
| O  | 19.58829806 | 31.99535235 | 14.89790286 |

|    |             |             |             |
|----|-------------|-------------|-------------|
| Zn | 6.75265203  | 13.10044867 | 15.71619807 |
| O  | 6.41516203  | 13.00367287 | 17.56224521 |
| Zn | 7.99392535  | 12.38851913 | 18.39358076 |
| O  | 8.07008105  | 12.04529398 | 20.23640147 |
| Zn | 9.73244704  | 12.85683775 | 15.53716723 |
| O  | 9.69041855  | 12.98002419 | 17.54857129 |
| Zn | 11.34643249 | 12.40741039 | 18.37910511 |
| O  | 11.36409695 | 12.06999623 | 20.21792497 |
| Zn | 12.98518620 | 12.89129084 | 15.50405030 |
| O  | 12.98677285 | 13.01056283 | 17.52148645 |
| Zn | 14.63182560 | 12.40730538 | 18.37418778 |
| O  | 14.61561650 | 12.07027462 | 20.21324324 |
| Zn | 16.23181616 | 12.85036306 | 15.51551191 |
| O  | 16.28143189 | 12.97744881 | 17.53428431 |
| Zn | 17.97854335 | 12.38711125 | 18.37597026 |
| O  | 17.90943557 | 12.04497858 | 20.22125389 |
| Zn | 19.23072433 | 13.10623124 | 15.71807133 |
| O  | 19.56810484 | 13.00195714 | 17.56284814 |
| Zn | 5.08412456  | 16.02050871 | 15.77658775 |
| O  | 4.78073199  | 15.86992128 | 17.61701957 |
| Zn | 6.28525673  | 14.84191402 | 18.23552499 |
| O  | 6.41457998  | 14.86830548 | 20.24860756 |
| Zn | 8.11868873  | 15.84265141 | 15.55062752 |
| O  | 8.02825667  | 15.82872759 | 17.56572186 |
| Zn | 9.67326688  | 14.93989585 | 18.20990832 |
| O  | 9.70177190  | 14.85966828 | 20.22095174 |
| Zn | 11.34243722 | 15.80200891 | 15.50518225 |
| O  | 11.33075540 | 15.84160708 | 17.54192256 |
| Zn | 12.98868960 | 14.96329721 | 18.20578395 |
| O  | 12.99075890 | 14.88384231 | 20.21057329 |
| Zn | 14.63040747 | 15.80238177 | 15.50677448 |
| O  | 14.64485462 | 15.84154493 | 17.54231380 |
| Zn | 16.30674585 | 14.93644050 | 18.19771343 |
| O  | 16.28130598 | 14.85858312 | 20.21098332 |
| Zn | 17.86763844 | 15.83832551 | 15.54541134 |
| O  | 17.95378574 | 15.82460984 | 17.55886595 |
| Zn | 19.70090338 | 14.84295933 | 18.22353684 |
| O  | 19.57191189 | 14.86855743 | 20.23552019 |
| Zn | 20.89371263 | 16.01408423 | 15.73663925 |
| O  | 21.19511877 | 15.86766928 | 17.57930727 |
| Zn | 3.43312350  | 18.87984074 | 15.78991364 |
| O  | 3.15100498  | 18.69647858 | 17.63185423 |
| Zn | 4.68229784  | 17.69062698 | 18.25897167 |
| O  | 4.78703295  | 17.74607209 | 20.27394150 |
| Zn | 6.47794036  | 18.73599660 | 15.59306869 |
| O  | 6.40218680  | 18.69287510 | 17.59739026 |
| Zn | 8.02869325  | 17.71903923 | 18.20913578 |

|    |             |             |             |
|----|-------------|-------------|-------------|
| O  | 8.06067483  | 17.72628464 | 20.24255764 |
| Zn | 9.70890517  | 18.69354153 | 15.55360527 |
| O  | 9.68552320  | 18.68890543 | 17.57814658 |
| Zn | 11.33760792 | 17.74353677 | 18.19889642 |
| O  | 11.34406763 | 17.72855507 | 20.22396155 |
| Zn | 12.99208884 | 18.67921676 | 15.54123740 |
| O  | 12.99075885 | 18.68906033 | 17.56942066 |
| Zn | 14.64644713 | 17.74363915 | 18.19655863 |
| O  | 14.64064823 | 17.72830176 | 20.22127081 |
| Zn | 16.27449837 | 18.68605019 | 15.54320322 |
| O  | 16.29598061 | 18.68583169 | 17.56932129 |
| Zn | 17.95710569 | 17.71790142 | 18.19375475 |
| O  | 17.92505812 | 17.72495733 | 20.22867323 |
| Zn | 19.51133208 | 18.72685968 | 15.56343626 |
| O  | 19.58075454 | 18.68846407 | 17.57273861 |
| Zn | 21.29991099 | 17.68406852 | 18.23213106 |
| O  | 21.19936092 | 17.74082863 | 20.24990642 |
| Zn | 22.54534523 | 18.86526149 | 15.75885834 |
| O  | 22.82870133 | 18.69027758 | 17.60247506 |
| Zn | 1.73634888  | 21.78685513 | 15.75344964 |
| O  | 1.48441409  | 21.54727891 | 17.60359438 |
| Zn | 3.01462227  | 20.50618744 | 18.25939307 |
| O  | 3.10280990  | 20.59363123 | 20.28125906 |
| Zn | 4.78963309  | 21.60497616 | 15.57416873 |
| O  | 4.73293669  | 21.53675531 | 17.59498977 |
| Zn | 6.37776490  | 20.58048534 | 18.21585214 |
| O  | 6.39970254  | 20.60556501 | 20.25222230 |
| Zn | 8.05307612  | 21.56049903 | 15.56165272 |
| O  | 8.03684893  | 21.54493982 | 17.58803310 |
| Zn | 9.68648197  | 20.58796083 | 18.21095451 |
| O  | 9.69012437  | 20.59536395 | 20.24121596 |
| Zn | 11.34209383 | 21.54937126 | 15.55272375 |
| O  | 11.33664461 | 21.54757916 | 17.58234171 |
| Zn | 12.99206334 | 20.59229762 | 18.19814605 |
| O  | 12.99229077 | 20.59376458 | 20.22604106 |
| Zn | 14.64279210 | 21.54701517 | 15.55132273 |
| O  | 14.64525399 | 21.54672961 | 17.58080984 |
| Zn | 16.29880815 | 20.58556433 | 18.20161706 |
| O  | 16.29514707 | 20.59397785 | 20.23294141 |
| Zn | 17.93394321 | 21.55591509 | 15.55159499 |
| O  | 17.94642322 | 21.54241925 | 17.57918168 |
| Zn | 19.60683569 | 20.57417304 | 18.19813539 |
| O  | 19.58585222 | 20.60174084 | 20.23599242 |
| Zn | 21.19466228 | 21.59582862 | 15.56411915 |
| O  | 21.25042149 | 21.53282745 | 17.58412733 |
| Zn | 22.96902790 | 20.49768157 | 18.23623401 |
| O  | 22.88261703 | 20.58857319 | 20.25899201 |



|    |             |             |             |
|----|-------------|-------------|-------------|
| Zn | 24.24253612 | 21.77537577 | 15.73421034 |
| O  | 24.49774790 | 21.54021389 | 17.58625821 |
| Zn | 1.74000219  | 23.22223181 | 18.43030275 |
| O  | 1.47959529  | 23.45354347 | 20.27917506 |
| Zn | 3.00901279  | 24.49752855 | 15.57659842 |
| O  | 3.09535472  | 24.40413595 | 17.59514213 |
| Zn | 4.78734498  | 23.40144941 | 18.23977622 |
| O  | 4.72886861  | 23.46599970 | 20.26224162 |
| Zn | 6.36342973  | 24.42186118 | 15.53089162 |
| O  | 6.39074140  | 24.39435725 | 17.57486782 |
| Zn | 8.04822257  | 23.44125385 | 18.21370035 |
| O  | 8.03294132  | 23.45959781 | 20.24494195 |
| Zn | 9.68091722  | 24.41286441 | 15.55269360 |
| O  | 9.68723327  | 24.40738158 | 17.58421614 |
| Zn | 11.34113491 | 23.45211482 | 18.20543512 |
| O  | 11.33610044 | 23.45944202 | 20.23698717 |
| Zn | 12.99039068 | 24.40840215 | 15.55361711 |
| O  | 12.99018731 | 24.41013267 | 17.58433081 |
| Zn | 14.64253586 | 23.45188372 | 18.20242696 |
| O  | 14.64805108 | 23.45923134 | 20.23420961 |
| Zn | 16.30124831 | 24.41171553 | 15.55160888 |
| O  | 16.29406525 | 24.40726610 | 17.58279545 |
| Zn | 17.93817058 | 23.44027826 | 18.20079970 |
| O  | 17.95251207 | 23.45864806 | 20.23362055 |
| Zn | 19.61857958 | 24.42708295 | 15.51207787 |
| O  | 19.59056369 | 24.39669673 | 17.56053625 |
| Zn | 21.19725767 | 23.40249009 | 18.21601837 |
| O  | 21.25624898 | 23.46518329 | 20.24171615 |
| Zn | 22.97246359 | 24.50438869 | 15.54792318 |
| O  | 22.88598342 | 24.40771393 | 17.57232277 |
| Zn | 24.24168348 | 23.22250525 | 18.39879320 |
| O  | 24.50476173 | 23.45257171 | 20.24977825 |
| Zn | 3.43028358  | 26.11824664 | 18.43073856 |
| O  | 3.15467534  | 26.29760988 | 20.27818390 |
| Zn | 4.66077119  | 27.30228840 | 15.54442823 |
| O  | 4.76242723  | 27.24706706 | 17.57081956 |
| Zn | 6.46329202  | 26.26817198 | 18.23039830 |
| O  | 6.39768072  | 26.31300762 | 20.24514287 |
| Zn | 8.00699966  | 27.27243476 | 15.52649980 |
| O  | 8.04664756  | 27.26681684 | 17.56800474 |
| Zn | 9.70143820  | 26.31168985 | 18.20429305 |
| O  | 9.67938767  | 26.32053115 | 20.23381992 |
| Zn | 11.32866763 | 27.25279238 | 15.54582656 |
| O  | 11.33774937 | 27.26988969 | 17.57410615 |
| Zn | 12.99043716 | 26.32127866 | 18.19838035 |
| O  | 12.99130822 | 26.31947009 | 20.23124263 |
| Zn | 14.64572599 | 27.25448647 | 15.54634209 |

|    |             |             |             |
|----|-------------|-------------|-------------|
| O  | 14.63955654 | 27.27114021 | 17.57421791 |
| Zn | 16.28288145 | 26.31431489 | 18.19371461 |
| O  | 16.30450429 | 26.32158330 | 20.22519151 |
| Zn | 17.97489462 | 27.27809945 | 15.50602945 |
| O  | 17.93371693 | 27.27054936 | 17.55329349 |
| Zn | 19.51851055 | 26.27080382 | 18.21265715 |
| O  | 19.58581126 | 26.31423046 | 20.22928525 |
| Zn | 21.31479810 | 27.30535219 | 15.52491424 |
| O  | 21.21773313 | 27.25093154 | 17.55370277 |
| Zn | 22.55227069 | 26.12006170 | 18.40848138 |
| O  | 22.82885801 | 26.29880008 | 20.25679065 |
| Zn | 5.07170495  | 28.97421868 | 18.41693828 |
| O  | 4.77925847  | 29.13338392 | 20.26268873 |
| Zn | 6.24890277  | 30.13541184 | 15.53920824 |
| O  | 6.38126707  | 30.11370828 | 17.56320491 |
| Zn | 8.09607445  | 29.15888482 | 18.21300879 |
| O  | 8.01254490  | 29.18347858 | 20.23535621 |
| Zn | 9.65756104  | 30.05927854 | 15.55299221 |
| O  | 9.68624325  | 30.13986150 | 17.57074116 |
| Zn | 11.33666134 | 29.19244341 | 18.18317814 |
| O  | 11.32323332 | 29.16465440 | 20.22020864 |
| Zn | 12.98637386 | 30.03698328 | 15.55440870 |
| O  | 12.98742734 | 30.11401870 | 17.56511734 |
| Zn | 14.64161316 | 29.19400494 | 18.18100705 |
| O  | 14.65749188 | 29.16580580 | 20.21800621 |
| Zn | 16.31554331 | 30.05988881 | 15.54840817 |
| O  | 16.28920656 | 30.14076469 | 17.56691873 |
| Zn | 17.88386791 | 29.16057989 | 18.20166151 |
| O  | 17.96957153 | 29.18508778 | 20.22489277 |
| Zn | 19.72374279 | 30.14388504 | 15.53229476 |
| O  | 19.59576127 | 30.11906290 | 17.55461749 |
| Zn | 20.90988192 | 28.97714756 | 18.39933714 |
| O  | 21.20339717 | 29.13629913 | 20.24573860 |
| Zn | 6.71994297  | 31.88311482 | 18.38549128 |
| O  | 6.38712513  | 32.00228617 | 20.23419519 |
| Zn | 7.97281488  | 32.60901270 | 15.72914742 |
| O  | 8.04694076  | 32.95430242 | 17.57694672 |
| Zn | 9.71551875  | 32.14529746 | 18.21279969 |
| O  | 9.67277182  | 32.02982486 | 20.22955316 |
| Zn | 11.32873655 | 32.59683241 | 15.72938386 |
| O  | 11.34985171 | 32.92878312 | 17.57481441 |
| Zn | 12.98500610 | 32.10606883 | 18.20097651 |
| O  | 12.98818283 | 31.99513671 | 20.21780675 |
| Zn | 14.63028084 | 32.60168705 | 15.73875419 |
| O  | 14.62001704 | 32.93400505 | 17.58373689 |
| Zn | 16.26262806 | 32.14777057 | 18.20148894 |
| O  | 16.30864306 | 32.03139516 | 20.22024022 |

|    |             |             |             |
|----|-------------|-------------|-------------|
| Zn | 18.00303002 | 32.61388636 | 15.70784830 |
| O  | 17.92788774 | 32.95607775 | 17.55886377 |
| Zn | 19.25560770 | 31.89032842 | 18.37188370 |
| O  | 19.59312518 | 32.00682983 | 20.22022498 |
| Zn | 6.75973162  | 13.10013886 | 21.08945396 |
| O  | 6.43210529  | 12.99763454 | 22.93348526 |
| Zn | 8.02188676  | 12.37953266 | 23.75033904 |
| O  | 8.10939032  | 11.99907570 | 25.57987219 |
| Zn | 9.74029636  | 12.85141322 | 20.88212025 |
| O  | 9.70167266  | 12.97850019 | 22.88693168 |
| Zn | 11.34323384 | 12.40308856 | 23.73775551 |
| O  | 11.36927198 | 12.04356797 | 25.56592038 |
| Zn | 12.99126343 | 12.88638233 | 20.87483623 |
| O  | 12.99325032 | 13.00583673 | 22.88284116 |
| Zn | 14.64650231 | 12.40276385 | 23.73301589 |
| O  | 14.62310316 | 12.04351457 | 25.56138421 |
| Zn | 16.24275751 | 12.85071530 | 20.87256637 |
| O  | 16.28497942 | 12.97770997 | 22.87784100 |
| Zn | 17.96799533 | 12.37830381 | 23.73581804 |
| O  | 17.88325010 | 11.99879839 | 25.56600155 |
| Zn | 19.22420663 | 13.09775568 | 21.06952355 |
| O  | 19.55467895 | 12.99608079 | 22.91412522 |
| Zn | 5.10514295  | 16.00465973 | 21.10075022 |
| O  | 4.80304577  | 15.85809870 | 22.94286645 |
| Zn | 6.28369037  | 14.82762556 | 23.61681557 |
| O  | 6.40731576  | 14.83316702 | 25.63578297 |
| Zn | 8.12319413  | 15.83050020 | 20.90267967 |
| O  | 8.03095434  | 15.81348185 | 22.91523474 |
| Zn | 9.67797630  | 14.92343241 | 23.57345085 |
| O  | 9.70111483  | 14.81616463 | 25.57808980 |
| Zn | 11.34736687 | 15.80146295 | 20.85176352 |
| O  | 11.33129159 | 15.83495291 | 22.88065304 |
| Zn | 12.99528442 | 14.95754753 | 23.54338683 |
| O  | 12.99664746 | 14.87447745 | 25.54178279 |
| Zn | 14.63854377 | 15.80022188 | 20.84592929 |
| O  | 14.65663729 | 15.83432596 | 22.87555187 |
| Zn | 16.31241283 | 14.92274051 | 23.56369490 |
| O  | 16.29232007 | 14.81593169 | 25.56899150 |
| Zn | 17.86279950 | 15.82905646 | 20.88800183 |
| O  | 17.95736676 | 15.81235954 | 22.90169748 |
| Zn | 19.70576387 | 14.82521310 | 23.59869745 |
| O  | 19.58629620 | 14.83192670 | 25.61881327 |
| Zn | 20.88348014 | 16.00385793 | 21.08532037 |
| O  | 21.18701669 | 15.85591247 | 22.92683776 |
| Zn | 3.44728918  | 18.87393356 | 21.11494331 |
| O  | 3.17698326  | 18.70142062 | 22.96494170 |
| Zn | 4.70221664  | 17.67361812 | 23.58354620 |

|    |             |             |             |
|----|-------------|-------------|-------------|
| O  | 4.80435823  | 17.71242758 | 25.60380178 |
| Zn | 6.48431960  | 18.72839796 | 20.91574145 |
| O  | 6.41075181  | 18.69494946 | 22.92439391 |
| Zn | 8.03222820  | 17.70641023 | 23.53371923 |
| O  | 8.05210315  | 17.70270006 | 25.56597737 |
| Zn | 9.71421583  | 18.68537476 | 20.86908684 |
| O  | 9.68574962  | 18.68508873 | 22.89324808 |
| Zn | 11.34426212 | 17.74068114 | 23.51038463 |
| O  | 11.34765875 | 17.72185327 | 25.52645841 |
| Zn | 12.99366650 | 18.67866848 | 20.84856215 |
| O  | 12.99449329 | 18.69215435 | 22.87426674 |
| Zn | 14.64741747 | 17.74015554 | 23.50503946 |
| O  | 14.64646001 | 17.72162753 | 25.52151777 |
| Zn | 16.27446801 | 18.68427793 | 20.86006430 |
| O  | 16.30394778 | 18.68427174 | 22.88468513 |
| Zn | 17.95951968 | 17.70521649 | 23.52012124 |
| O  | 17.94241810 | 17.70210457 | 25.55291640 |
| Zn | 19.50444690 | 18.72513628 | 20.89817376 |
| O  | 19.57947210 | 18.69300936 | 22.90741653 |
| Zn | 21.28906026 | 17.67253577 | 23.56447600 |
| O  | 21.19018680 | 17.71158733 | 25.58468700 |
| Zn | 22.53948933 | 18.86923307 | 21.09113739 |
| O  | 22.81225135 | 18.69920827 | 22.94144183 |
| Zn | 1.74486165  | 21.77644867 | 21.10336059 |
| O  | 1.48404900  | 21.54858331 | 22.95427810 |
| Zn | 3.02451357  | 20.51028140 | 23.58333500 |
| O  | 3.09925545  | 20.60674296 | 25.60870250 |
| Zn | 4.79600293  | 21.59646704 | 20.90841981 |
| O  | 4.73901611  | 21.54162896 | 22.93101420 |
| Zn | 6.38072509  | 20.57493947 | 23.55333650 |
| O  | 6.38310725  | 20.60016026 | 25.60119585 |
| Zn | 8.05537906  | 21.56007276 | 20.87945169 |
| O  | 8.03183057  | 21.55139991 | 22.90939022 |
| Zn | 9.69094693  | 20.58671840 | 23.50827332 |
| O  | 9.68734039  | 20.59702772 | 25.53423468 |
| Zn | 11.34707555 | 21.54664362 | 20.85483582 |
| O  | 11.34211767 | 21.54821471 | 22.88252999 |
| Zn | 12.99621125 | 20.59075178 | 23.51250891 |
| O  | 12.99729495 | 20.59173904 | 25.54046715 |
| Zn | 14.64134774 | 21.54597479 | 20.84993023 |
| O  | 14.64758046 | 21.54788878 | 22.87810324 |
| Zn | 16.30149399 | 20.58634387 | 23.49859400 |
| O  | 16.30736646 | 20.59683729 | 25.52499844 |
| Zn | 17.93330270 | 21.55871806 | 20.86512467 |
| O  | 17.95824754 | 21.55069416 | 22.89618341 |
| Zn | 19.61169277 | 20.57405426 | 23.53434535 |
| O  | 19.61187777 | 20.59944662 | 25.58326799 |

|    |             |             |             |
|----|-------------|-------------|-------------|
| Zn | 21.19210457 | 21.59497609 | 20.88445985 |
| O  | 21.25093278 | 21.54088445 | 22.90906224 |
| Zn | 22.96714891 | 20.50956177 | 23.55562290 |
| O  | 22.89594925 | 20.60598351 | 25.58247750 |
| Zn | 24.24288518 | 21.77491208 | 21.07231347 |
| O  | 24.50601175 | 21.54751604 | 22.92413724 |
| Zn | 1.73223149  | 23.21594145 | 23.79438855 |
| O  | 1.47863427  | 23.43529239 | 25.65362410 |
| Zn | 3.01180106  | 24.49228605 | 20.92220404 |
| O  | 3.08310563  | 24.40627864 | 22.94998921 |
| Zn | 4.78757133  | 23.40634072 | 23.56383701 |
| O  | 4.71677898  | 23.47542844 | 25.59062174 |
| Zn | 6.37559816  | 24.42357867 | 20.86782796 |
| O  | 6.38773519  | 24.41352178 | 22.91143885 |
| Zn | 8.05102677  | 23.44865503 | 23.52502709 |
| O  | 8.02031250  | 23.47568317 | 25.55456548 |
| Zn | 9.68409939  | 24.41602475 | 20.85869511 |
| O  | 9.68412148  | 24.42267190 | 22.89205626 |
| Zn | 11.34168073 | 23.45407374 | 23.49211009 |
| O  | 11.32951801 | 23.46176895 | 25.51729219 |
| Zn | 12.99358179 | 24.40839665 | 20.84958657 |
| O  | 12.99454780 | 24.41757989 | 22.88035279 |
| Zn | 14.65070540 | 23.45411980 | 23.48665636 |
| O  | 14.66498139 | 23.46185085 | 25.51228866 |
| Zn | 16.30398494 | 24.41650614 | 20.84816988 |
| O  | 16.30541167 | 24.42295263 | 22.88279506 |
| Zn | 17.94126247 | 23.44859513 | 23.51001246 |
| O  | 17.97438837 | 23.47567530 | 25.54045679 |
| Zn | 19.61247482 | 24.42396253 | 20.84900183 |
| O  | 19.60218298 | 24.41403916 | 22.89427396 |
| Zn | 21.20453869 | 23.40602098 | 23.54037826 |
| O  | 21.27808234 | 23.47521174 | 25.56825678 |
| Zn | 22.97531593 | 24.49165911 | 20.89521215 |
| O  | 22.90712498 | 24.40636341 | 22.92490990 |
| Zn | 24.26016317 | 23.21516333 | 23.76387423 |
| O  | 24.51663867 | 23.43504479 | 25.62331898 |
| Zn | 3.42976602  | 26.13765180 | 23.73951102 |
| O  | 3.15530597  | 26.32973661 | 25.59257299 |
| Zn | 4.68059311  | 27.31146820 | 20.89887514 |
| O  | 4.77539316  | 27.27893802 | 22.92428252 |
| Zn | 6.47715833  | 26.28935405 | 23.55756268 |
| O  | 6.40119339  | 26.34507982 | 25.57309612 |
| Zn | 8.02267586  | 27.28585006 | 20.85848316 |
| O  | 8.05424665  | 27.29701901 | 22.90138637 |
| Zn | 9.70570193  | 26.32377664 | 23.52738013 |
| O  | 9.67256229  | 26.34106096 | 25.55999215 |
| Zn | 11.33295461 | 27.25497867 | 20.85597991 |

|    |             |             |             |
|----|-------------|-------------|-------------|
| O  | 11.33684066 | 27.28149277 | 22.88401010 |
| Zn | 12.99576378 | 26.33217000 | 23.48827891 |
| O  | 12.99697786 | 26.33847847 | 25.51609464 |
| Zn | 14.65329849 | 27.25508106 | 20.85065566 |
| O  | 14.65162043 | 27.28165476 | 22.87935618 |
| Zn | 16.28567677 | 26.32399371 | 23.51778791 |
| O  | 16.32151521 | 26.34142364 | 25.55092366 |
| Zn | 17.96338472 | 27.28692127 | 20.84564426 |
| O  | 17.93453841 | 27.29806002 | 22.88942544 |
| Zn | 19.51428265 | 26.28985176 | 23.53958901 |
| O  | 19.59307394 | 26.34560165 | 25.55572819 |
| Zn | 21.30449671 | 27.31310402 | 20.87787929 |
| O  | 21.21362266 | 27.28038823 | 22.90447942 |
| Zn | 22.56224590 | 26.13799389 | 23.71343612 |
| O  | 22.83921489 | 26.33012391 | 25.56676869 |
| Zn | 5.08701582  | 29.01369939 | 23.75253073 |
| O  | 4.79992276  | 29.17914614 | 25.60542793 |
| Zn | 6.26986904  | 30.16458063 | 20.90439684 |
| O  | 6.40234853  | 30.16767790 | 22.93047249 |
| Zn | 8.11289541  | 29.18794685 | 23.55724301 |
| O  | 8.02907849  | 29.22254720 | 25.58569850 |
| Zn | 9.66152350  | 30.06876190 | 20.86984092 |
| O  | 9.69202214  | 30.16300896 | 22.88916416 |
| Zn | 11.33918586 | 29.20649096 | 23.49571724 |
| O  | 11.31847337 | 29.18852831 | 25.52975974 |
| Zn | 12.99122364 | 30.03436422 | 20.86009117 |
| O  | 12.99325176 | 30.11244398 | 22.86663588 |
| Zn | 14.65065916 | 29.20677407 | 23.49031746 |
| O  | 14.67454669 | 29.18877365 | 25.52480785 |
| Zn | 16.32249036 | 30.07062059 | 20.86071571 |
| O  | 16.29521966 | 30.16416827 | 22.88093198 |
| Zn | 17.87718914 | 29.18920150 | 23.54372495 |
| O  | 17.96434184 | 29.22360933 | 25.57271384 |
| Zn | 19.71375458 | 30.16797996 | 20.88700316 |
| O  | 19.58530806 | 30.17010290 | 22.91459430 |
| Zn | 20.90367342 | 29.01542057 | 23.73139825 |
| O  | 21.19381101 | 29.18040077 | 25.58436574 |
| Zn | 6.75617265  | 31.93766928 | 23.77206570 |
| O  | 6.44951344  | 32.05927024 | 25.62892051 |
| Zn | 7.96779076  | 32.62624479 | 21.05026361 |
| O  | 8.05145982  | 32.98642454 | 22.89430606 |
| Zn | 9.72053004  | 32.17362026 | 23.52321470 |
| O  | 9.67821434  | 32.07265001 | 25.54379536 |
| Zn | 11.33299160 | 32.60939814 | 21.03587376 |
| O  | 11.35631947 | 32.94740372 | 22.88081718 |
| Zn | 12.99458606 | 32.10570722 | 23.47528125 |
| O  | 12.99639020 | 31.98726587 | 25.48043323 |

|    |             |             |             |
|----|-------------|-------------|-------------|
| Zn | 14.64921247 | 32.60962507 | 21.02686014 |
| O  | 14.62912489 | 32.94671050 | 22.87273678 |
| Zn | 16.26661994 | 32.17470977 | 23.51380227 |
| O  | 16.31372369 | 32.07367128 | 25.53486326 |
| Zn | 18.01392215 | 32.62912935 | 21.03945378 |
| O  | 17.93406397 | 32.98902780 | 22.88384508 |
| Zn | 19.23281474 | 31.93945387 | 23.75611997 |
| O  | 19.54359256 | 32.06094809 | 25.61265032 |
| Zn | 6.83319805  | 13.05148858 | 26.46124006 |
| O  | 6.46044121  | 12.94352355 | 28.29091112 |
| Zn | 7.81572956  | 12.32892011 | 29.41220220 |
| O  | 8.18068733  | 11.94074327 | 31.14615176 |
| Zn | 9.75999906  | 12.74478184 | 26.34244117 |
| O  | 9.71181716  | 12.87127034 | 28.33102705 |
| Zn | 11.44783510 | 12.35302192 | 29.16907645 |
| O  | 11.47320922 | 11.86214957 | 30.94537767 |
| Zn | 12.99732462 | 12.85895242 | 26.20931072 |
| O  | 12.99925506 | 13.00287709 | 28.19694574 |
| Zn | 14.55395815 | 12.35290548 | 29.16402173 |
| O  | 14.53298501 | 11.86326230 | 30.94074343 |
| Zn | 16.23514465 | 12.74496363 | 26.33266025 |
| O  | 16.28714958 | 12.87125796 | 28.32159011 |
| Zn | 18.18535403 | 12.32768079 | 29.39790334 |
| O  | 17.82310222 | 11.93811192 | 31.13207353 |
| Zn | 19.16190578 | 13.05070976 | 26.44468931 |
| O  | 19.53778163 | 12.94278005 | 28.27391809 |
| Zn | 5.12381777  | 15.99530509 | 26.49904904 |
| O  | 4.80814147  | 15.89613933 | 28.34805150 |
| Zn | 6.25705823  | 14.75031392 | 28.95399401 |
| O  | 6.37356710  | 14.74189997 | 30.99003818 |
| Zn | 8.13250183  | 15.80434306 | 26.24557228 |
| O  | 8.03883617  | 15.76512576 | 28.26162946 |
| Zn | 9.69725282  | 14.80012768 | 28.78699725 |
| O  | 9.77082529  | 14.74478769 | 30.92154525 |
| Zn | 11.34360397 | 15.78866306 | 26.16379834 |
| O  | 11.30733466 | 15.83361697 | 28.18359711 |
| Zn | 13.00046163 | 14.95013196 | 28.81022312 |
| O  | 13.00257573 | 14.92726803 | 30.78040385 |
| Zn | 14.65202778 | 15.78867691 | 26.15901804 |
| O  | 14.69157141 | 15.83357409 | 28.17900403 |
| Zn | 16.30362944 | 14.80018583 | 28.77736222 |
| O  | 16.23511892 | 14.74508423 | 30.91313056 |
| Zn | 17.86331004 | 15.80392518 | 26.23216989 |
| O  | 17.96021469 | 15.76511952 | 28.24850684 |
| Zn | 19.74333260 | 14.74961356 | 28.93637185 |
| O  | 19.63098918 | 14.74160417 | 30.97278159 |
| Zn | 20.87234941 | 15.99410477 | 26.47876478 |

|    |             |             |             |
|----|-------------|-------------|-------------|
| O  | 21.19088017 | 15.89523450 | 28.32758244 |
| Zn | 3.45988942  | 18.86017732 | 26.37638788 |
| O  | 3.08687704  | 18.70353010 | 28.20235070 |
| Zn | 4.55160585  | 17.72928952 | 28.97728758 |
| O  | 4.68900323  | 17.85709601 | 30.99459546 |
| Zn | 6.49115664  | 18.70317946 | 26.25748894 |
| O  | 6.38097711  | 18.69021279 | 28.27482863 |
| Zn | 8.06782212  | 17.68299948 | 28.88850259 |
| O  | 7.85833436  | 17.51437702 | 30.85771342 |
| Zn | 9.71366342  | 18.67573846 | 26.15262553 |
| O  | 9.65253854  | 18.67621868 | 28.15330347 |
| Zn | 11.28162937 | 17.75261446 | 28.85525291 |
| O  | 11.35510968 | 17.71928679 | 30.82863884 |
| Zn | 12.99842910 | 18.65696556 | 26.16285329 |
| O  | 12.99985492 | 18.67253717 | 28.18452589 |
| Zn | 14.72058754 | 17.75274784 | 28.85052868 |
| O  | 14.65118449 | 17.71899186 | 30.82408878 |
| Zn | 16.28283607 | 18.67562700 | 26.14291303 |
| O  | 16.34687595 | 18.67626496 | 28.14371755 |
| Zn | 17.93403675 | 17.68341842 | 28.87470635 |
| O  | 18.14692531 | 17.51591425 | 30.84378792 |
| Zn | 19.50537957 | 18.70304768 | 26.24026261 |
| O  | 19.61891806 | 18.69016808 | 28.25774922 |
| Zn | 21.45037444 | 17.72867437 | 28.95510828 |
| O  | 21.31735528 | 17.85581345 | 30.97296473 |
| Zn | 22.53743811 | 18.86030335 | 26.35161952 |
| O  | 22.91293588 | 18.70307919 | 28.17724405 |
| Zn | 1.75575172  | 21.74312035 | 26.47107254 |
| O  | 1.44313931  | 21.60165380 | 28.34134826 |
| Zn | 2.90297206  | 20.41319312 | 28.99325373 |
| O  | 2.98403064  | 20.53304338 | 31.01826752 |
| Zn | 4.78115300  | 21.60938556 | 26.25364092 |
| O  | 4.67814272  | 21.56669163 | 28.29235936 |
| Zn | 6.36658312  | 20.60102884 | 28.69794706 |
| O  | 6.39651394  | 20.64359742 | 30.89923727 |
| Zn | 8.06522396  | 21.56817641 | 26.16887789 |
| O  | 8.01961424  | 21.57951625 | 28.19572276 |
| Zn | 9.67746217  | 20.53485683 | 28.83616717 |
| O  | 9.66116658  | 20.63399643 | 30.81620183 |
| Zn | 11.34173779 | 21.55119464 | 26.15400664 |
| O  | 11.33332851 | 21.55277731 | 28.17942026 |
| Zn | 13.00118753 | 20.58494024 | 28.68446767 |
| O  | 13.00360753 | 20.58913134 | 30.83303815 |
| Zn | 14.65547551 | 21.55129151 | 26.14883620 |
| O  | 14.66682368 | 21.55289007 | 28.17435386 |
| Zn | 16.32524214 | 20.53515323 | 28.82624835 |
| O  | 16.34564087 | 20.63425784 | 30.80632862 |



|    |             |             |             |
|----|-------------|-------------|-------------|
| Zn | 17.93200395 | 21.56827382 | 26.15429302 |
| O  | 17.98071913 | 21.57961224 | 28.18162013 |
| Zn | 19.63550373 | 20.60132797 | 28.67933831 |
| O  | 19.61059424 | 20.64372242 | 30.88122960 |
| Zn | 21.21595508 | 21.60918332 | 26.23043171 |
| O  | 21.32250017 | 21.56672303 | 28.26968963 |
| Zn | 23.09915767 | 20.41336563 | 28.96634485 |
| O  | 23.02272477 | 20.53354867 | 30.99182026 |
| Zn | 24.24154622 | 21.74288013 | 26.44086014 |
| O  | 24.55739517 | 21.60132168 | 28.31093562 |
| Zn | 1.59100568  | 23.38092236 | 28.96268758 |
| O  | 1.22677474  | 23.61545409 | 30.90553583 |
| Zn | 3.01451901  | 24.51545492 | 26.20577546 |
| O  | 2.99723880  | 24.51853775 | 28.24963731 |
| Zn | 4.75365368  | 23.46954108 | 28.92644580 |
| O  | 4.31735051  | 23.33160861 | 30.85617110 |
| Zn | 6.36617233  | 24.44612449 | 26.16982984 |
| O  | 6.31116236  | 24.46050377 | 28.20202793 |
| Zn | 7.98277092  | 23.50102297 | 28.82182043 |
| O  | 7.97234637  | 23.51541295 | 30.81059089 |
| Zn | 9.68897586  | 24.41739763 | 26.15349299 |
| O  | 9.66740140  | 24.44056580 | 28.18235638 |
| Zn | 11.38925354 | 23.49036969 | 28.82606329 |
| O  | 11.26772471 | 23.43419363 | 30.79627407 |
| Zn | 12.99856266 | 24.41104995 | 26.10088394 |
| O  | 12.99993978 | 24.41906402 | 28.10176663 |
| Zn | 14.61381861 | 23.49044958 | 28.82073857 |
| O  | 14.73845683 | 23.43485452 | 30.79090387 |
| Zn | 16.30820487 | 24.41755090 | 26.14338744 |
| O  | 16.33285781 | 24.44076407 | 28.17264135 |
| Zn | 18.01993430 | 23.50128769 | 28.80732789 |
| O  | 18.03398777 | 23.51538879 | 30.79619105 |
| Zn | 19.63072516 | 24.44630262 | 26.15062424 |
| O  | 19.68916109 | 24.46084020 | 28.18327917 |
| Zn | 21.24901996 | 23.46985084 | 28.90304354 |
| O  | 21.68833979 | 23.33275750 | 30.83233355 |
| Zn | 22.98211831 | 24.51538967 | 26.17789203 |
| O  | 23.00337763 | 24.51858705 | 28.22248131 |
| Zn | 24.41143293 | 23.38090819 | 28.93159786 |
| O  | 24.77994578 | 23.61561512 | 30.87378857 |
| Zn | 3.32746974  | 26.26225206 | 28.97548928 |
| O  | 3.05618310  | 26.43432235 | 30.88583407 |
| Zn | 4.69058628  | 27.34152144 | 26.19487037 |
| O  | 4.72222769  | 27.35030136 | 28.23341280 |
| Zn | 6.44207413  | 26.28820487 | 28.93371859 |
| O  | 6.35995009  | 26.54470127 | 30.88329813 |
| Zn | 8.02226431  | 27.32153063 | 26.19487164 |

|    |             |             |             |
|----|-------------|-------------|-------------|
| O  | 8.02537277  | 27.36263399 | 28.25002625 |
| Zn | 9.69406644  | 26.34933012 | 28.70230935 |
| O  | 9.66487548  | 26.33438234 | 30.85530864 |
| Zn | 11.34669535 | 27.27742023 | 26.15478239 |
| O  | 11.33635981 | 27.31227705 | 28.17840432 |
| Zn | 13.00126056 | 26.28763723 | 28.79470469 |
| O  | 13.00332263 | 26.31209182 | 30.77698200 |
| Zn | 14.64977839 | 27.27772194 | 26.14986089 |
| O  | 14.66349351 | 27.31245713 | 28.17373958 |
| Zn | 16.30801240 | 26.34958070 | 28.69234159 |
| O  | 16.34200773 | 26.33469175 | 30.84556800 |
| Zn | 17.97415357 | 27.32222064 | 26.18050309 |
| O  | 17.97480654 | 27.36323083 | 28.23618765 |
| Zn | 19.56058672 | 26.28863132 | 28.91489085 |
| O  | 19.64694863 | 26.54540013 | 30.86444241 |
| Zn | 21.30565841 | 27.34221618 | 26.17160991 |
| O  | 21.27818225 | 27.35092954 | 28.21085145 |
| Zn | 22.67528314 | 26.26258987 | 28.94822889 |
| O  | 22.95090070 | 26.43468751 | 30.85818116 |
| Zn | 5.00685482  | 29.08727306 | 29.01850177 |
| O  | 4.63772015  | 29.27696303 | 30.91048161 |
| Zn | 6.29727632  | 30.20665127 | 26.23585382 |
| O  | 6.36077727  | 30.24292975 | 28.28947805 |
| Zn | 8.17933181  | 29.28790593 | 28.92965644 |
| O  | 7.97594311  | 29.28370315 | 30.91108079 |
| Zn | 9.68583995  | 30.11932724 | 26.21286933 |
| O  | 9.70323711  | 30.29895125 | 28.22569671 |
| Zn | 11.30889809 | 29.26928591 | 28.84505425 |
| O  | 11.32096238 | 29.13132462 | 30.83091428 |
| Zn | 12.99781407 | 30.04368299 | 26.17110018 |
| O  | 12.99951744 | 30.13523704 | 28.16111476 |
| Zn | 14.69277531 | 29.26941654 | 28.84049061 |
| O  | 14.68392321 | 29.13134906 | 30.82635679 |
| Zn | 16.30941967 | 30.11995286 | 26.20320954 |
| O  | 16.29587022 | 30.29922680 | 28.21650270 |
| Zn | 17.82270629 | 29.28839988 | 28.91563893 |
| O  | 18.02972802 | 29.28454917 | 30.89700389 |
| Zn | 19.69815476 | 30.20788581 | 26.21761223 |
| O  | 19.63889962 | 30.24372556 | 28.27186008 |
| Zn | 20.99551782 | 29.08790448 | 28.99605593 |
| O  | 21.36873102 | 29.27746829 | 30.88742638 |
| Zn | 6.74591917  | 31.97441864 | 29.09557557 |
| O  | 6.58302123  | 32.03005071 | 31.07368974 |
| Zn | 8.03926022  | 32.66200848 | 26.46437874 |
| O  | 8.09731972  | 33.02654361 | 28.32640574 |
| Zn | 9.86779839  | 32.35355139 | 28.93701491 |
| O  | 10.01517653 | 32.84287484 | 30.93492007 |

|    |             |             |             |
|----|-------------|-------------|-------------|
| Zn | 11.36537375 | 32.65192120 | 26.29097761 |
| O  | 11.42836160 | 33.05499823 | 28.11167798 |
| Zn | 13.00004547 | 32.12438179 | 28.77181743 |
| O  | 13.00189226 | 31.86906853 | 30.75051023 |
| Zn | 14.62953532 | 32.65231388 | 26.28752007 |
| O  | 14.56975491 | 33.05532824 | 28.10833129 |
| Zn | 16.13321655 | 32.35333786 | 28.92832023 |
| O  | 15.99030348 | 32.84152941 | 30.92707012 |
| Zn | 17.95554419 | 32.66302785 | 26.45090881 |
| O  | 17.90141687 | 33.02694055 | 28.31341324 |
| Zn | 19.25543676 | 31.97511458 | 29.07862207 |
| O  | 19.42307722 | 32.03015386 | 31.05644572 |
| Zn | 9.86024121  | 12.61711668 | 31.36164549 |
| Zn | 16.14634645 | 12.62047571 | 31.35306166 |
| Zn | 5.29761525  | 16.16901361 | 31.18445031 |
| Zn | 8.10380095  | 15.62690665 | 31.14590918 |
| Zn | 11.37104996 | 15.83355298 | 31.10770940 |
| Zn | 14.63503096 | 15.83342206 | 31.10320767 |
| Zn | 17.90231693 | 15.62900156 | 31.13259069 |
| Zn | 20.70880718 | 16.16790667 | 31.16397239 |
| Zn | 6.44576721  | 18.72627307 | 31.10479779 |
| Zn | 13.00365534 | 18.61320022 | 31.06529630 |
| Zn | 19.56181811 | 18.72638600 | 31.08672800 |
| Zn | 1.86857728  | 21.93436744 | 31.19921702 |
| Zn | 4.69369752  | 21.47527622 | 31.11474827 |
| Zn | 8.10228449  | 21.65019122 | 31.07275147 |
| Zn | 11.31444280 | 21.54928891 | 31.05222703 |
| Zn | 14.69365149 | 21.54996940 | 31.04704085 |
| Zn | 17.90573175 | 21.65008559 | 31.05870035 |
| Zn | 21.31373036 | 21.47641729 | 31.09201490 |
| Zn | 24.13927561 | 21.93447363 | 31.16926093 |
| Zn | 2.92457960  | 24.59014535 | 31.22429189 |
| Zn | 9.65281328  | 24.37266599 | 31.05706127 |
| Zn | 16.35466689 | 24.37288150 | 31.04707017 |
| Zn | 23.08304403 | 24.59039770 | 31.19628654 |
| Zn | 4.68818368  | 27.36943706 | 31.24887040 |
| Zn | 8.05574760  | 27.38456100 | 31.12893272 |
| Zn | 11.39349462 | 27.25324133 | 31.05288933 |
| Zn | 14.61446725 | 27.25306976 | 31.04831188 |
| Zn | 17.95213481 | 27.38520782 | 31.11444785 |
| Zn | 21.32007775 | 27.36972879 | 31.22535186 |
| Zn | 6.29364333  | 30.11237660 | 31.28635024 |
| Zn | 13.00294244 | 29.97067041 | 31.06620321 |
| Zn | 19.71372728 | 30.11227524 | 31.26743213 |
| Zn | 8.33108667  | 32.44213030 | 31.33382746 |
| Zn | 11.76753740 | 33.24093737 | 31.55266525 |
| Zn | 14.23989733 | 33.23991379 | 31.54876033 |

Zn 17.67553183 32.44083908 31.32129660

**WZ-528**

|   |             |             |            |
|---|-------------|-------------|------------|
| O | 8.10691495  | 12.16903351 | 4.27816416 |
| O | 11.34313527 | 12.13508524 | 5.39985132 |
| O | 14.58097144 | 12.32810449 | 4.43530209 |
| O | 17.90957806 | 12.25251327 | 4.22831587 |
| O | 6.42847704  | 14.94895906 | 4.45872537 |
| O | 9.71409660  | 14.88229429 | 4.71217832 |
| O | 12.97613420 | 14.92366346 | 4.73078647 |
| O | 16.27274581 | 14.93724153 | 4.68503445 |
| O | 19.57336927 | 14.97380512 | 4.43654620 |
| O | 4.81609673  | 17.79941048 | 4.41313007 |
| O | 8.10535710  | 17.78141005 | 4.68723421 |
| O | 11.36154165 | 17.74620790 | 4.77011844 |
| O | 14.62649375 | 17.75948009 | 4.74243572 |
| O | 17.88761759 | 17.80165923 | 4.67912037 |
| O | 21.17979420 | 17.81058074 | 4.41001695 |
| O | 3.16677371  | 20.63510491 | 4.46690091 |
| O | 6.44549539  | 20.66025332 | 4.69381632 |
| O | 9.72354729  | 20.62821156 | 4.77941660 |
| O | 12.99602141 | 20.61228962 | 4.79987163 |
| O | 16.26997366 | 20.63729347 | 4.77599954 |
| O | 19.55060228 | 20.66832389 | 4.69407858 |
| O | 22.83056774 | 20.63873562 | 4.46744366 |
| O | 1.59115651  | 23.47000302 | 4.29350415 |
| O | 4.73597508  | 23.52603105 | 4.74589673 |
| O | 8.03888375  | 23.49180596 | 4.77499807 |
| O | 11.34206646 | 23.47057295 | 4.80252491 |
| O | 14.65256724 | 23.47262195 | 4.80247048 |
| O | 17.95722212 | 23.49559009 | 4.77453516 |
| O | 21.26177055 | 23.52853607 | 4.74874446 |
| O | 24.40978755 | 23.47004099 | 4.29907687 |
| O | 3.11432914  | 26.29479280 | 5.50616830 |
| O | 6.35763348  | 26.34165663 | 4.72184724 |
| O | 9.67039924  | 26.31234162 | 4.77406576 |
| O | 12.99771615 | 26.28805306 | 4.77867209 |
| O | 16.32560923 | 26.31334865 | 4.77471242 |
| O | 19.63951093 | 26.34288545 | 4.72249424 |
| O | 22.88256188 | 26.29415605 | 5.50853796 |
| O | 4.77838576  | 29.17348315 | 5.50371680 |
| O | 7.99034079  | 29.15035075 | 4.74157598 |
| O | 11.33125991 | 29.10299948 | 4.69128506 |
| O | 14.66453672 | 29.10289694 | 4.69161382 |
| O | 18.00624956 | 29.15040196 | 4.74230168 |
| O | 21.21863125 | 29.17304091 | 5.50596715 |

|    |             |             |            |
|----|-------------|-------------|------------|
| O  | 6.46914613  | 31.89941299 | 4.28663040 |
| O  | 9.71432771  | 31.95093638 | 4.45871121 |
| O  | 12.99800567 | 31.93520379 | 4.40318790 |
| O  | 16.28184837 | 31.95016349 | 4.45885019 |
| O  | 19.52794022 | 31.89883917 | 4.28821826 |
| Zn | 6.79841371  | 13.18686836 | 5.04609311 |
| O  | 6.29451545  | 13.00754406 | 6.89025939 |
| Zn | 7.80589240  | 12.37711210 | 7.81421564 |
| O  | 7.98342900  | 11.99228408 | 9.65402401 |
| Zn | 9.66913229  | 12.93628791 | 4.95931128 |
| O  | 9.48191057  | 13.02115139 | 7.11760014 |
| Zn | 11.31298345 | 12.30695752 | 7.40070970 |
| O  | 11.33831625 | 12.08678035 | 9.32927008 |
| Zn | 12.99256794 | 13.00016481 | 5.03249627 |
| O  | 13.13760768 | 13.05677829 | 7.15357615 |
| Zn | 14.78950106 | 12.35560367 | 7.80460555 |
| O  | 14.66731776 | 11.99994352 | 9.66955752 |
| Zn | 16.26729670 | 12.98090288 | 4.68673421 |
| O  | 16.39759435 | 12.92247971 | 6.95232289 |
| Zn | 18.08349836 | 12.38747013 | 7.73895505 |
| O  | 17.99264443 | 12.01645826 | 9.59668223 |
| Zn | 19.21022816 | 13.21996350 | 5.06340637 |
| O  | 19.66326407 | 13.01011767 | 6.90286509 |
| Zn | 5.09566243  | 16.08566836 | 5.14943307 |
| O  | 4.69685075  | 15.86026712 | 7.00420667 |
| Zn | 6.22911188  | 14.85705013 | 7.59774917 |
| O  | 6.33494516  | 14.83026448 | 9.65009445 |
| Zn | 8.09501949  | 15.88328546 | 4.94580732 |
| O  | 7.94011498  | 15.82160049 | 7.10859563 |
| Zn | 9.61914784  | 14.94276896 | 7.64088927 |
| O  | 9.66264807  | 14.83361392 | 9.71309197 |
| Zn | 11.32949860 | 15.84633587 | 5.04021663 |
| O  | 11.31710922 | 15.82458442 | 7.18930833 |
| Zn | 13.01314437 | 14.96719396 | 7.69649852 |
| O  | 12.99992148 | 14.85485164 | 9.74332786 |
| Zn | 14.62049178 | 15.85560019 | 5.00012855 |
| O  | 14.68664342 | 15.84348379 | 7.15684069 |
| Zn | 16.36117820 | 14.88965597 | 7.53985039 |
| O  | 16.33001951 | 14.80284444 | 9.65319000 |
| Zn | 17.91211007 | 15.90400182 | 4.91564644 |
| O  | 18.04159035 | 15.80323861 | 7.08327962 |
| Zn | 19.75474074 | 14.85560047 | 7.60363693 |
| O  | 19.65693475 | 14.83547675 | 9.64701483 |
| Zn | 20.90320331 | 16.09944299 | 5.15218690 |
| O  | 21.28928363 | 15.85654501 | 7.00357984 |
| Zn | 3.47838550  | 18.90861226 | 5.14876210 |
| O  | 3.08922504  | 18.64526444 | 7.00122732 |

|    |             |             |            |
|----|-------------|-------------|------------|
| Zn | 4.65107168  | 17.69184918 | 7.62955952 |
| O  | 4.71785561  | 17.72437086 | 9.67120403 |
| Zn | 6.46705963  | 18.75401392 | 4.92844765 |
| O  | 6.33364638  | 18.66346522 | 7.09457274 |
| Zn | 7.99173483  | 17.72999843 | 7.61339391 |
| O  | 8.01806194  | 17.71303208 | 9.71853136 |
| Zn | 9.73171544  | 18.73012565 | 5.06266534 |
| O  | 9.67176360  | 18.68329613 | 7.20273434 |
| Zn | 11.33372182 | 17.74124558 | 7.69653111 |
| O  | 11.33641743 | 17.71328579 | 9.77487141 |
| Zn | 12.99280465 | 18.71480391 | 5.08393472 |
| O  | 12.99902262 | 18.68888961 | 7.22547007 |
| Zn | 14.66751829 | 17.74276512 | 7.69293641 |
| O  | 14.66130737 | 17.70342215 | 9.77255939 |
| Zn | 16.25314251 | 18.73697186 | 5.05093958 |
| O  | 16.32320835 | 18.68693725 | 7.19301412 |
| Zn | 17.99305345 | 17.71411606 | 7.59936240 |
| O  | 17.97154294 | 17.70394695 | 9.70656117 |
| Zn | 19.52965906 | 18.76327425 | 4.92800056 |
| O  | 19.65465460 | 18.65668095 | 7.09234681 |
| Zn | 21.33857086 | 17.68901308 | 7.63116608 |
| O  | 21.27429696 | 17.72269079 | 9.67077491 |
| Zn | 22.51911562 | 18.91392253 | 5.15254424 |
| O  | 22.90222927 | 18.64129969 | 7.00359298 |
| Zn | 1.81593135  | 21.82686906 | 5.06128099 |
| O  | 1.39716076  | 21.43065735 | 6.89244481 |
| Zn | 2.98273944  | 20.47109403 | 7.60188620 |
| O  | 3.01231734  | 20.56706271 | 9.65734021 |
| Zn | 4.80499948  | 21.61716056 | 4.95451701 |
| O  | 4.67187328  | 21.47434296 | 7.11916274 |
| Zn | 6.35181960  | 20.56629780 | 7.61565810 |
| O  | 6.35435200  | 20.59095702 | 9.72221949 |
| Zn | 8.08475666  | 21.59040397 | 5.06500826 |
| O  | 8.02482376  | 21.53227725 | 7.20601384 |
| Zn | 9.68264856  | 20.58963153 | 7.71414435 |
| O  | 9.67748979  | 20.58720011 | 9.79627699 |
| Zn | 11.36137579 | 21.57454118 | 5.12080522 |
| O  | 11.34299369 | 21.55308511 | 7.25254445 |
| Zn | 12.99726555 | 20.59363040 | 7.74252742 |
| O  | 12.99831386 | 20.58456361 | 9.82084381 |
| Zn | 14.62881957 | 21.57616787 | 5.11892494 |
| O  | 14.65117336 | 21.55324572 | 7.25169034 |
| Zn | 16.31228178 | 20.58960689 | 7.71066081 |
| O  | 16.31681055 | 20.58422708 | 9.79399988 |
| Zn | 17.90951032 | 21.59429020 | 5.06418968 |
| O  | 17.97002076 | 21.53264643 | 7.20481966 |
| Zn | 19.64009045 | 20.56037324 | 7.61438802 |

|    |             |             |            |
|----|-------------|-------------|------------|
| O  | 19.63781553 | 20.58616658 | 9.72066949 |
| Zn | 21.19331481 | 21.62024826 | 4.95542516 |
| O  | 21.32092357 | 21.47057290 | 7.12043544 |
| Zn | 23.01013717 | 20.46774547 | 7.60496133 |
| O  | 22.98096701 | 20.56452474 | 9.65903023 |
| Zn | 24.18316300 | 21.82722793 | 5.06626502 |
| O  | 24.59696766 | 21.42607461 | 6.89696412 |
| Zn | 1.59400367  | 23.03426347 | 7.85042986 |
| O  | 1.36610290  | 23.39558167 | 9.68662206 |
| Zn | 3.02304691  | 24.44543367 | 4.99942823 |
| O  | 2.98795230  | 24.16678025 | 7.15253555 |
| Zn | 4.75088248  | 23.36897703 | 7.65012026 |
| O  | 4.67980322  | 23.45234966 | 9.72429112 |
| Zn | 6.39331700  | 24.44804699 | 5.05306056 |
| O  | 6.38161813  | 24.37750285 | 7.20263660 |
| Zn | 8.04541248  | 23.43544393 | 7.71087751 |
| O  | 8.01834848  | 23.45815956 | 9.78827719 |
| Zn | 9.69616938  | 24.41475273 | 5.09800554 |
| O  | 9.69085006  | 24.41609557 | 7.23737037 |
| Zn | 11.34278336 | 23.46300168 | 7.74894842 |
| O  | 11.33644096 | 23.46557356 | 9.82591919 |
| Zn | 12.99672054 | 24.39624067 | 5.12032299 |
| O  | 12.99727047 | 24.41790469 | 7.25368758 |
| Zn | 14.65197058 | 23.46290890 | 7.74846431 |
| O  | 14.65871782 | 23.46539632 | 9.82552074 |
| Zn | 16.29861824 | 24.41549577 | 5.09793893 |
| O  | 16.30418509 | 24.41554854 | 7.23747383 |
| Zn | 17.94961142 | 23.43519941 | 7.71146071 |
| O  | 17.97611445 | 23.45637355 | 9.78845725 |
| Zn | 19.60364886 | 24.44905210 | 5.05409681 |
| O  | 19.61373537 | 24.37664332 | 7.20372509 |
| Zn | 21.24322514 | 23.36532046 | 7.65130136 |
| O  | 21.31387732 | 23.44878830 | 9.72496994 |
| Zn | 22.97558398 | 24.44470871 | 5.00237412 |
| O  | 23.00676666 | 24.16426983 | 7.15456277 |
| Zn | 24.40031712 | 23.03108734 | 7.85345305 |
| O  | 24.62840319 | 23.39303832 | 9.68925451 |
| Zn | 3.23473849  | 26.09660824 | 7.46790015 |
| O  | 3.08653498  | 26.25964706 | 9.38675100 |
| Zn | 4.75641480  | 27.26588632 | 5.23566371 |
| O  | 4.85566331  | 27.20875662 | 7.41091969 |
| Zn | 6.52190053  | 26.24621871 | 7.77785457 |
| O  | 6.39781605  | 26.31869355 | 9.81561027 |
| Zn | 8.01661352  | 27.25388291 | 5.05053021 |
| O  | 8.07012978  | 27.30075941 | 7.20056273 |
| Zn | 9.71729523  | 26.33150374 | 7.70999825 |
| O  | 9.68421247  | 26.34452081 | 9.78755176 |

|    |             |             |            |
|----|-------------|-------------|------------|
| Zn | 11.34217357 | 27.21834355 | 5.06194998 |
| O  | 11.35488552 | 27.30034202 | 7.20456801 |
| Zn | 12.99771454 | 26.33638478 | 7.71641276 |
| O  | 12.99753726 | 26.34287480 | 9.79856597 |
| Zn | 14.65326489 | 27.21816613 | 5.06215473 |
| O  | 14.64074768 | 27.29981743 | 7.20486580 |
| Zn | 16.27844073 | 26.33104081 | 7.71048588 |
| O  | 16.31093605 | 26.34383581 | 9.78783853 |
| Zn | 17.97983627 | 27.25382556 | 5.05111236 |
| O  | 17.92589778 | 27.29986454 | 7.20134330 |
| Zn | 19.47412721 | 26.24555171 | 7.77879786 |
| O  | 19.59723223 | 26.31723308 | 9.81680797 |
| Zn | 21.24103826 | 27.26581410 | 5.23673850 |
| O  | 21.14092731 | 27.20758703 | 7.41291662 |
| Zn | 22.75973453 | 26.09364754 | 7.46977360 |
| O  | 22.90806822 | 26.25690409 | 9.38878895 |
| Zn | 5.00831369  | 29.16924953 | 7.46616941 |
| O  | 4.79344616  | 29.21614094 | 9.38503470 |
| Zn | 6.33631184  | 30.17348436 | 4.99616174 |
| O  | 6.55910630  | 30.34512403 | 7.14868480 |
| Zn | 8.13056185  | 29.21726826 | 7.64679861 |
| O  | 8.02128406  | 29.23927684 | 9.72096003 |
| Zn | 9.67956831  | 30.04185391 | 4.94857137 |
| O  | 9.73243253  | 30.23133531 | 7.11380938 |
| Zn | 11.35881947 | 29.23161039 | 7.61183216 |
| O  | 11.33595726 | 29.21973077 | 9.71929024 |
| Zn | 12.99792325 | 30.02954413 | 4.92392114 |
| O  | 12.99790464 | 30.19750312 | 7.09127553 |
| Zn | 14.63652546 | 29.23105237 | 7.61207083 |
| O  | 14.65909915 | 29.21927843 | 9.71959859 |
| Zn | 16.31667225 | 30.04098497 | 4.94884223 |
| O  | 16.26352821 | 30.23005886 | 7.11430294 |
| Zn | 17.86484834 | 29.21621766 | 7.64799090 |
| O  | 17.97396695 | 29.23823413 | 9.72189997 |
| Zn | 19.66074833 | 30.17279246 | 4.99778188 |
| O  | 19.43722366 | 30.34391286 | 7.15053231 |
| Zn | 20.98849283 | 29.16854014 | 7.46801601 |
| O  | 21.20253345 | 29.21500266 | 9.38756812 |
| Zn | 6.84481141  | 32.11962591 | 7.84212948 |
| O  | 6.41458990  | 32.13811137 | 9.67764081 |
| Zn | 8.00681135  | 32.52625656 | 5.05061174 |
| O  | 8.13486752  | 33.08933094 | 6.88188200 |
| Zn | 9.75789929  | 32.19618182 | 7.59243722 |
| O  | 9.68573267  | 32.12590426 | 9.64906352 |
| Zn | 11.36875922 | 32.54132624 | 5.13645314 |
| O  | 11.39189342 | 33.01464742 | 6.98820055 |
| Zn | 12.99781778 | 32.14078522 | 7.62075174 |



|    |             |             |             |
|----|-------------|-------------|-------------|
| O  | 12.99768499 | 32.07169110 | 9.66372932  |
| Zn | 14.62741458 | 32.54064386 | 5.13646206  |
| O  | 14.60416577 | 33.01387261 | 6.98820646  |
| Zn | 16.23777924 | 32.19484349 | 7.59260027  |
| O  | 16.30961191 | 32.12501282 | 9.64939914  |
| Zn | 17.98936765 | 32.52496191 | 5.05072869  |
| O  | 17.86088896 | 33.08773479 | 6.88225060  |
| Zn | 19.15067838 | 32.11865232 | 7.84320487  |
| O  | 19.58061891 | 32.13696312 | 9.67861875  |
| Zn | 6.69592237  | 13.08482427 | 10.48787305 |
| O  | 6.37684560  | 12.95865990 | 12.34328407 |
| Zn | 8.01918396  | 12.33761850 | 13.04861626 |
| O  | 8.06429865  | 11.99337266 | 14.91597412 |
| Zn | 9.73407920  | 12.81103079 | 10.10739450 |
| O  | 9.69671542  | 12.90534442 | 12.20050850 |
| Zn | 11.34116534 | 12.35275650 | 13.05134684 |
| O  | 11.36196820 | 12.02944900 | 14.90942743 |
| Zn | 12.96247057 | 12.83077676 | 10.09677570 |
| O  | 12.97467113 | 12.93344407 | 12.19295864 |
| Zn | 14.63165195 | 12.35213427 | 13.00815848 |
| O  | 14.63347904 | 12.03840557 | 14.87779341 |
| Zn | 16.30602198 | 12.82619968 | 10.24204411 |
| O  | 16.33334165 | 12.92791020 | 12.28455948 |
| Zn | 18.02418369 | 12.33398433 | 13.09198247 |
| O  | 17.94857173 | 11.98712427 | 14.95239872 |
| Zn | 19.29540418 | 13.07166075 | 10.44857654 |
| O  | 19.62284235 | 12.95610889 | 12.30698146 |
| Zn | 5.02578518  | 15.98680422 | 10.47160684 |
| O  | 4.73644434  | 15.84004587 | 12.32951009 |
| Zn | 6.24975271  | 14.82325906 | 12.93368868 |
| O  | 6.37248494  | 14.84509512 | 14.96740703 |
| Zn | 8.06168217  | 15.81490115 | 10.26856745 |
| O  | 7.98952505  | 15.78497809 | 12.32499052 |
| Zn | 9.65461642  | 14.87528862 | 12.86423479 |
| O  | 9.68427714  | 14.81219902 | 14.92831817 |
| Zn | 11.33023116 | 15.77781790 | 10.25569792 |
| O  | 11.32440827 | 15.80015105 | 12.33589055 |
| Zn | 12.99972774 | 14.89504395 | 12.86289698 |
| O  | 12.99910617 | 14.84039878 | 14.92305216 |
| Zn | 14.68404168 | 15.76252580 | 10.24522720 |
| O  | 14.67877040 | 15.79317493 | 12.32939377 |
| Zn | 16.34937307 | 14.89342983 | 12.90267531 |
| O  | 16.31518320 | 14.81919976 | 14.95329295 |
| Zn | 17.91373711 | 15.80100632 | 10.24160269 |
| O  | 18.00309694 | 15.78575409 | 12.30700830 |
| Zn | 19.73955411 | 14.81847220 | 12.91718599 |
| O  | 19.62291561 | 14.84019491 | 14.95850719 |

|    |             |             |             |
|----|-------------|-------------|-------------|
| Zn | 20.96421949 | 15.98600354 | 10.47308466 |
| O  | 21.25756989 | 15.83848047 | 12.33038373 |
| Zn | 3.36616692  | 18.85458304 | 10.47591042 |
| O  | 3.09474470  | 18.67853395 | 12.33383018 |
| Zn | 4.64089152  | 17.67780059 | 12.92476042 |
| O  | 4.73362606  | 17.73394167 | 14.96677023 |
| Zn | 6.42665385  | 18.71230321 | 10.30189637 |
| O  | 6.35860344  | 18.67157598 | 12.34549705 |
| Zn | 7.99786675  | 17.69735707 | 12.90048294 |
| O  | 8.03108297  | 17.70812497 | 14.97427389 |
| Zn | 9.68289549  | 18.66814837 | 10.30317942 |
| O  | 9.66643698  | 18.66407493 | 12.37510721 |
| Zn | 11.32937196 | 17.71660312 | 12.92035480 |
| O  | 11.33735121 | 17.70173694 | 14.98934366 |
| Zn | 13.00157506 | 18.65693771 | 10.32003038 |
| O  | 12.99909273 | 18.66453148 | 12.39389268 |
| Zn | 14.66683907 | 17.71173443 | 12.91565778 |
| O  | 14.65866577 | 17.70071913 | 14.98627065 |
| Zn | 16.31273406 | 18.66463319 | 10.29848880 |
| O  | 16.32908522 | 18.66181032 | 12.37140850 |
| Zn | 17.99882618 | 17.69406238 | 12.89301002 |
| O  | 17.96628639 | 17.70678210 | 14.97003702 |
| Zn | 19.56080018 | 18.70528684 | 10.29484255 |
| O  | 19.63576940 | 18.67037569 | 12.33965811 |
| Zn | 21.35229927 | 17.67696527 | 12.92296315 |
| O  | 21.26109404 | 17.73430310 | 14.96502812 |
| Zn | 22.62574805 | 18.85172289 | 10.47629134 |
| O  | 22.89966717 | 18.67666141 | 12.33388119 |
| Zn | 1.67723916  | 21.73194141 | 10.51475560 |
| O  | 1.41312283  | 21.53459914 | 12.37144886 |
| Zn | 2.97307593  | 20.49552276 | 12.94494146 |
| O  | 3.05187436  | 20.59665097 | 14.97628795 |
| Zn | 4.72907191  | 21.57225933 | 10.27315446 |
| O  | 4.67059347  | 21.52382859 | 12.32982070 |
| Zn | 6.33315909  | 20.57793808 | 12.90317199 |
| O  | 6.35873074  | 20.60372796 | 14.97659476 |
| Zn | 8.01775021  | 21.54716337 | 10.30949125 |
| O  | 8.00462722  | 21.54122106 | 12.38037171 |
| Zn | 9.66406426  | 20.58043286 | 12.93241872 |
| O  | 9.67321543  | 20.58769467 | 15.00644591 |
| Zn | 11.33661865 | 21.54505152 | 10.34512750 |
| O  | 11.33291423 | 21.54439589 | 12.41772105 |
| Zn | 12.99828809 | 20.58317253 | 12.94681607 |
| O  | 12.99777014 | 20.58269213 | 15.02150940 |
| Zn | 14.66000661 | 21.54499804 | 10.34436306 |
| O  | 14.66333086 | 21.54410227 | 12.41714331 |
| Zn | 16.33109040 | 20.57766578 | 12.93095217 |

|    |             |             |             |
|----|-------------|-------------|-------------|
| O  | 16.32210137 | 20.58588741 | 15.00540302 |
| Zn | 17.97619793 | 21.54480396 | 10.30825868 |
| O  | 17.98971069 | 21.53982060 | 12.37925320 |
| Zn | 19.66096297 | 20.57552696 | 12.90071630 |
| O  | 19.63606962 | 20.60313332 | 14.97488406 |
| Zn | 21.26279901 | 21.56817933 | 10.27271633 |
| O  | 21.32358829 | 21.52204327 | 12.32943632 |
| Zn | 23.02077383 | 20.49369250 | 12.94494272 |
| O  | 22.94254479 | 20.59580148 | 14.97641653 |
| Zn | 24.31639420 | 21.72889835 | 10.51638068 |
| O  | 24.58141620 | 21.53262555 | 12.37296697 |
| Zn | 1.69304297  | 23.27506518 | 13.06258025 |
| O  | 1.41865741  | 23.49246874 | 14.92907377 |
| Zn | 2.95531033  | 24.49847778 | 10.14629339 |
| O  | 3.03052789  | 24.43676184 | 12.22022117 |
| Zn | 4.71148687  | 23.41826904 | 12.88130447 |
| O  | 4.67500069  | 23.48157642 | 14.93869004 |
| Zn | 6.33380307  | 24.40594550 | 10.28651701 |
| O  | 6.34724447  | 24.40444327 | 12.35836614 |
| Zn | 8.01619093  | 23.45569033 | 12.92923852 |
| O  | 8.00651880  | 23.47238814 | 14.99560218 |
| Zn | 9.66862511  | 24.42962841 | 10.33078765 |
| O  | 9.67215763  | 24.42787079 | 12.40275543 |
| Zn | 11.33447224 | 23.46664289 | 12.94976380 |
| O  | 11.33191389 | 23.46971161 | 15.02384454 |
| Zn | 12.99771666 | 24.42732363 | 10.34813061 |
| O  | 12.99780619 | 24.43137532 | 12.42013496 |
| Zn | 14.66094514 | 23.46612745 | 12.94983483 |
| O  | 14.66309101 | 23.46911639 | 15.02395941 |
| Zn | 16.32656737 | 24.42896951 | 10.33112155 |
| O  | 16.32304916 | 24.42733969 | 12.40290023 |
| Zn | 17.97874465 | 23.45415118 | 12.92887792 |
| O  | 17.98811454 | 23.47152400 | 14.99552561 |
| Zn | 19.66096384 | 24.40425182 | 10.28697399 |
| O  | 19.64755483 | 24.40306904 | 12.35891074 |
| Zn | 21.28315654 | 23.41631550 | 12.88156732 |
| O  | 21.31953724 | 23.48089840 | 14.93903774 |
| Zn | 23.03877812 | 24.49565917 | 10.14815685 |
| O  | 22.96397142 | 24.43526818 | 12.22194544 |
| Zn | 24.30184410 | 23.27336987 | 13.06343130 |
| O  | 24.57586668 | 23.49160242 | 14.93003149 |
| Zn | 3.39142594  | 26.17526796 | 12.99766837 |
| O  | 3.11500640  | 26.32925753 | 14.86282573 |
| Zn | 4.61467779  | 27.34888707 | 9.94520353  |
| O  | 4.68761769  | 27.30609510 | 12.11722598 |
| Zn | 6.38526196  | 26.32606443 | 12.82633970 |
| O  | 6.35284793  | 26.34592696 | 14.90123651 |

|    |             |             |             |
|----|-------------|-------------|-------------|
| Zn | 8.02209090  | 27.33072509 | 10.28590458 |
| O  | 8.03019339  | 27.32004738 | 12.35761760 |
| Zn | 9.68544513  | 26.34776758 | 12.92938883 |
| O  | 9.66735968  | 26.35007939 | 14.99549109 |
| Zn | 11.33736727 | 27.30212064 | 10.31014454 |
| O  | 11.33679087 | 27.31678726 | 12.38071113 |
| Zn | 12.99749291 | 26.35859203 | 12.93508660 |
| O  | 12.99735345 | 26.34867557 | 15.00838037 |
| Zn | 14.65800859 | 27.30165952 | 10.31041297 |
| O  | 14.65823972 | 27.31659725 | 12.38094184 |
| Zn | 16.30943265 | 26.34711088 | 12.92978791 |
| O  | 16.32719725 | 26.34960929 | 14.99600723 |
| Zn | 17.97337454 | 27.32946448 | 10.28656509 |
| O  | 17.96461673 | 27.31907879 | 12.35847604 |
| Zn | 19.60963916 | 26.32482212 | 12.82697230 |
| O  | 19.64164371 | 26.34500526 | 14.90209857 |
| Zn | 21.38090217 | 27.34769344 | 9.94702676  |
| O  | 21.30670266 | 27.30457558 | 12.11892891 |
| Zn | 22.60282878 | 26.17360436 | 12.99950644 |
| O  | 22.87984264 | 26.32891156 | 14.86418737 |
| Zn | 5.01944383  | 28.99545313 | 12.99472483 |
| O  | 4.74894729  | 29.15814834 | 14.86024865 |
| Zn | 6.25387511  | 30.21132889 | 10.14175998 |
| O  | 6.34410537  | 30.17702123 | 12.21593741 |
| Zn | 8.06604418  | 29.22999949 | 12.87856439 |
| O  | 7.99375929  | 29.23172357 | 14.93622468 |
| Zn | 9.67390028  | 30.13770796 | 10.26916207 |
| O  | 9.68532491  | 30.21366365 | 12.32601710 |
| Zn | 11.33485943 | 29.24625045 | 12.90179742 |
| O  | 11.32631296 | 29.21277685 | 14.97512373 |
| Zn | 12.99761936 | 30.09889560 | 10.29938056 |
| O  | 12.99739660 | 30.17912408 | 12.34337335 |
| Zn | 14.65969736 | 29.24599572 | 12.90210332 |
| O  | 14.66795420 | 29.21265217 | 14.97538784 |
| Zn | 16.32124146 | 30.13675185 | 10.26983985 |
| O  | 16.30949532 | 30.21318101 | 12.32660218 |
| Zn | 17.92837720 | 29.22886923 | 12.87919062 |
| O  | 18.00041177 | 29.23104455 | 14.93696875 |
| Zn | 19.74112930 | 30.21017420 | 10.14296048 |
| O  | 19.65045033 | 30.17601498 | 12.21683973 |
| Zn | 20.97487959 | 28.99424837 | 12.99589007 |
| O  | 21.24479237 | 29.15730393 | 14.86139990 |
| Zn | 6.68131047  | 31.91675009 | 13.05724544 |
| O  | 6.35575158  | 32.04605857 | 14.92373420 |
| Zn | 8.00986191  | 32.70065902 | 10.50732702 |
| O  | 8.04739426  | 33.02931455 | 12.36375213 |
| Zn | 9.72620311  | 32.19826519 | 12.94079388 |

|    |             |             |             |
|----|-------------|-------------|-------------|
| O  | 9.67881120  | 32.08108114 | 14.97230056 |
| Zn | 11.34394437 | 32.67727459 | 10.47031513 |
| O  | 11.35962003 | 33.00182645 | 12.32766703 |
| Zn | 12.99747912 | 32.16312391 | 12.92366613 |
| O  | 12.99720089 | 32.05686368 | 14.96550572 |
| Zn | 14.65147683 | 32.67690629 | 10.47052615 |
| O  | 14.63552994 | 33.00157001 | 12.32780034 |
| Zn | 16.26877432 | 32.19777206 | 12.94115572 |
| O  | 16.31551403 | 32.08090330 | 14.97266353 |
| Zn | 17.98515359 | 32.69952197 | 10.50799793 |
| O  | 17.94763196 | 33.02876425 | 12.36420773 |
| Zn | 19.31341142 | 31.91577700 | 13.05783184 |
| O  | 19.63838808 | 32.04545157 | 14.92444135 |
| Zn | 6.72731888  | 13.05225900 | 15.70941108 |
| O  | 6.39429502  | 12.95091613 | 17.57563831 |
| Zn | 7.98723198  | 12.32573683 | 18.36182939 |
| O  | 8.05662973  | 11.97750284 | 20.22384072 |
| Zn | 9.72954254  | 12.81704325 | 15.53497009 |
| O  | 9.69219895  | 12.92832670 | 17.57752597 |
| Zn | 11.35107172 | 12.34637752 | 18.37563974 |
| O  | 11.36317337 | 12.01728365 | 20.23364971 |
| Zn | 13.00351678 | 12.85283488 | 15.51087033 |
| O  | 13.00006700 | 12.95583791 | 17.56059719 |
| Zn | 14.64697642 | 12.34676953 | 18.38031098 |
| O  | 14.63219219 | 12.01700798 | 20.23747240 |
| Zn | 16.26282187 | 12.81067135 | 15.52307405 |
| O  | 16.30160793 | 12.92594953 | 17.57293012 |
| Zn | 18.00277789 | 12.32645438 | 18.36260341 |
| O  | 17.93748676 | 11.97816465 | 20.22611534 |
| Zn | 19.27928882 | 13.06227650 | 15.73730705 |
| O  | 19.60911790 | 12.95346258 | 17.60095125 |
| Zn | 5.03969762  | 15.99131331 | 15.75760916 |
| O  | 4.75583159  | 15.84562997 | 17.61996346 |
| Zn | 6.26908928  | 14.80678571 | 18.18091982 |
| O  | 6.38081771  | 14.82855644 | 20.22671184 |
| Zn | 8.09849910  | 15.80319018 | 15.54327708 |
| O  | 8.01738178  | 15.78976883 | 17.59553702 |
| Zn | 9.66617077  | 14.89076416 | 18.18835742 |
| O  | 9.68388396  | 14.80718367 | 20.24253476 |
| Zn | 11.34322481 | 15.76188622 | 15.50060302 |
| O  | 11.33357381 | 15.79620705 | 17.58687595 |
| Zn | 12.99676878 | 14.91198843 | 18.19547345 |
| O  | 12.99729080 | 14.82936095 | 20.24456470 |
| Zn | 14.64961997 | 15.76459620 | 15.50998418 |
| O  | 14.66142573 | 15.79752470 | 17.59307982 |
| Zn | 16.32998840 | 14.88858715 | 18.18629842 |
| O  | 16.31170169 | 14.80693706 | 20.24227890 |

|    |             |             |             |
|----|-------------|-------------|-------------|
| Zn | 17.90540058 | 15.80739149 | 15.55455525 |
| O  | 17.98205637 | 15.79036763 | 17.60366973 |
| Zn | 19.73156522 | 14.81309790 | 18.19370666 |
| O  | 19.61649113 | 14.83261615 | 20.23567323 |
| Zn | 20.95457296 | 15.98938468 | 15.74993942 |
| O  | 21.23959037 | 15.84714091 | 17.61269492 |
| Zn | 3.37732933  | 18.86716308 | 15.76185293 |
| O  | 3.10711383  | 18.69879443 | 17.62409495 |
| Zn | 4.64915698  | 17.68626231 | 18.19068271 |
| O  | 4.73104343  | 17.73608179 | 20.23300795 |
| Zn | 6.43771373  | 18.71857867 | 15.56809919 |
| O  | 6.37599504  | 18.68443389 | 17.61105869 |
| Zn | 8.00452729  | 17.69734793 | 18.16295288 |
| O  | 8.02710297  | 17.69853546 | 20.24061110 |
| Zn | 9.69426078  | 18.67068506 | 15.55000185 |
| O  | 9.67598039  | 18.66781181 | 17.61945121 |
| Zn | 11.33234724 | 17.71193705 | 18.17078064 |
| O  | 11.33417986 | 17.69041239 | 20.24708701 |
| Zn | 12.99876412 | 18.65512430 | 15.54636819 |
| O  | 12.99825893 | 18.66374542 | 17.62370231 |
| Zn | 14.66384609 | 17.71365498 | 18.17386005 |
| O  | 14.66098577 | 17.69106345 | 20.24921823 |
| Zn | 16.30236265 | 18.66846306 | 15.54766347 |
| O  | 16.32009769 | 18.66726782 | 17.61812143 |
| Zn | 17.99093035 | 17.69959290 | 18.16686787 |
| O  | 17.96753455 | 17.69974676 | 20.24339650 |
| Zn | 19.55747972 | 18.71877595 | 15.56741185 |
| O  | 19.61927394 | 18.68450829 | 17.61084068 |
| Zn | 21.34628698 | 17.68579597 | 18.18973160 |
| O  | 21.26419920 | 17.73534277 | 20.23309292 |
| Zn | 22.61752636 | 18.86611811 | 15.76180993 |
| O  | 22.88823894 | 18.69887928 | 17.62410713 |
| Zn | 1.67481111  | 21.80142959 | 15.71243052 |
| O  | 1.41932376  | 21.56699747 | 17.57969725 |
| Zn | 2.96344110  | 20.53040818 | 18.18154366 |
| O  | 3.03788778  | 20.61953412 | 20.22644015 |
| Zn | 4.74336600  | 21.61383450 | 15.55048182 |
| O  | 4.68959028  | 21.55389694 | 17.60059558 |
| Zn | 6.33531580  | 20.58837338 | 18.16413241 |
| O  | 6.34587126  | 20.61099707 | 20.24113143 |
| Zn | 8.02294725  | 21.56453057 | 15.55142994 |
| O  | 8.01060553  | 21.55169567 | 17.62052680 |
| Zn | 9.66415551  | 20.58409046 | 18.17215208 |
| O  | 9.66262941  | 20.58495262 | 20.25246542 |
| Zn | 11.33578758 | 21.54773581 | 15.55830181 |
| O  | 11.33219243 | 21.54718479 | 17.63606609 |
| Zn | 12.99747768 | 20.58439244 | 18.16823310 |

|    |             |             |             |
|----|-------------|-------------|-------------|
| O  | 12.99726901 | 20.57907074 | 20.24945243 |
| Zn | 14.66025259 | 21.54700417 | 15.55800472 |
| O  | 14.66307571 | 21.54686309 | 17.63586851 |
| Zn | 16.33093768 | 20.58364516 | 18.17167807 |
| O  | 16.33195472 | 20.58507831 | 20.25224427 |
| Zn | 17.97198128 | 21.56351203 | 15.55056513 |
| O  | 17.98442482 | 21.55130654 | 17.62006295 |
| Zn | 19.65957370 | 20.58838181 | 18.16444287 |
| O  | 19.64879426 | 20.61086090 | 20.24158604 |
| Zn | 21.25111250 | 21.61293269 | 15.55019701 |
| O  | 21.30513130 | 21.55373626 | 17.60058588 |
| Zn | 23.03112717 | 20.53042391 | 18.18196807 |
| O  | 22.95645867 | 20.61966622 | 20.22700057 |
| Zn | 24.31921928 | 21.80040310 | 15.71288184 |
| O  | 24.57540173 | 21.56690686 | 17.58016180 |
| Zn | 1.67646137  | 23.26678919 | 18.35022752 |
| O  | 1.40688182  | 23.49890605 | 20.21365579 |
| Zn | 2.96945470  | 24.53432825 | 15.51711542 |
| O  | 3.04798967  | 24.44275276 | 17.56467112 |
| Zn | 4.73300717  | 23.43651559 | 18.17863224 |
| O  | 4.66939296  | 23.49363131 | 20.23509307 |
| Zn | 6.32747251  | 24.45559807 | 15.48960864 |
| O  | 6.35223793  | 24.42664982 | 17.57980031 |
| Zn | 8.00800848  | 23.46618132 | 18.16638947 |
| O  | 7.99077400  | 23.48055526 | 20.24388017 |
| Zn | 9.66274373  | 24.43470581 | 15.54998347 |
| O  | 9.66811349  | 24.43208122 | 17.62597557 |
| Zn | 11.33089233 | 23.47134234 | 18.16833164 |
| O  | 11.32470849 | 23.47626468 | 20.24942519 |
| Zn | 12.99763605 | 24.42866115 | 15.55926851 |
| O  | 12.99738146 | 24.43300706 | 17.63678354 |
| Zn | 14.66369534 | 23.47102672 | 18.16831474 |
| O  | 14.66957338 | 23.47622032 | 20.24943991 |
| Zn | 16.33222616 | 24.43421592 | 15.55009828 |
| O  | 16.32648394 | 24.43182563 | 17.62620011 |
| Zn | 17.98638281 | 23.46568447 | 18.16655864 |
| O  | 18.00346952 | 23.48034310 | 20.24415519 |
| Zn | 19.66703496 | 24.45460544 | 15.49005510 |
| O  | 19.64207003 | 24.42634444 | 17.58034378 |
| Zn | 21.26129718 | 23.43620743 | 18.17900136 |
| O  | 21.32470924 | 23.49354151 | 20.23564014 |
| Zn | 23.02509581 | 24.53335425 | 15.51774051 |
| O  | 22.94623126 | 24.44243093 | 17.56544627 |
| Zn | 24.31785026 | 23.26623949 | 18.35087972 |
| O  | 24.58702125 | 23.49877729 | 20.21434656 |
| Zn | 3.37354496  | 26.16639702 | 18.36921966 |
| O  | 3.09312924  | 26.34299063 | 20.22632106 |

|    |             |             |             |
|----|-------------|-------------|-------------|
| Zn | 4.63628839  | 27.33761769 | 15.49385779 |
| O  | 4.72214548  | 27.28822856 | 17.54539220 |
| Zn | 6.41659650  | 26.30959438 | 18.18480001 |
| O  | 6.34489954  | 26.35234371 | 20.23503546 |
| Zn | 7.97711637  | 27.31422289 | 15.48873858 |
| O  | 8.01454610  | 27.30747560 | 17.57900710 |
| Zn | 9.67381782  | 26.35288084 | 18.16581437 |
| O  | 9.65408658  | 26.36243133 | 20.24333796 |
| Zn | 11.32708143 | 27.29141802 | 15.55145739 |
| O  | 11.33260625 | 27.30893526 | 17.62035365 |
| Zn | 12.99719131 | 26.35950659 | 18.17170797 |
| O  | 12.99708587 | 26.36193471 | 20.25202972 |
| Zn | 14.66764048 | 27.29131227 | 15.55168468 |
| O  | 14.66183894 | 27.30892819 | 17.62062137 |
| Zn | 16.32047970 | 26.35261356 | 18.16610885 |
| O  | 16.34004285 | 26.36238069 | 20.24365974 |
| Zn | 18.01744207 | 27.31366098 | 15.48931742 |
| O  | 17.97977354 | 27.30728581 | 17.57962467 |
| Zn | 19.57767554 | 26.30931555 | 18.18528191 |
| O  | 19.64923692 | 26.35234885 | 20.23565674 |
| Zn | 21.35791452 | 27.33675773 | 15.49489878 |
| O  | 21.27202046 | 27.28802280 | 17.54640596 |
| Zn | 22.62082075 | 26.16611168 | 18.36972852 |
| O  | 22.90110704 | 26.34299084 | 20.22692753 |
| Zn | 5.01906567  | 29.01732015 | 18.36852724 |
| O  | 4.72652920  | 29.17315606 | 20.22558007 |
| Zn | 6.22946964  | 30.18283331 | 15.51438983 |
| O  | 6.34784575  | 30.16152195 | 17.56233225 |
| Zn | 8.06163890  | 29.20495636 | 18.17704878 |
| O  | 7.98181992  | 29.23311917 | 20.23359622 |
| Zn | 9.64449043  | 30.10777609 | 15.54833642 |
| O  | 9.66976021  | 30.18486902 | 17.59861813 |
| Zn | 11.32827842 | 29.24153105 | 18.16302151 |
| O  | 11.31579767 | 29.22228444 | 20.23996437 |
| Zn | 12.99715206 | 30.08857382 | 15.56785441 |
| O  | 12.99702476 | 30.15970448 | 17.61069807 |
| Zn | 14.66577499 | 29.24155514 | 18.16317800 |
| O  | 14.67813328 | 29.22237686 | 20.24014550 |
| Zn | 16.34984689 | 30.10751399 | 15.54870176 |
| O  | 16.32437108 | 30.18491900 | 17.59904135 |
| Zn | 17.93232892 | 29.20481122 | 18.17757630 |
| O  | 18.01207231 | 29.23316443 | 20.23410216 |
| Zn | 19.76455053 | 30.18225762 | 15.51511599 |
| O  | 19.64612125 | 30.16139012 | 17.56305603 |
| Zn | 20.97491019 | 29.01735300 | 18.36915531 |
| O  | 21.26757083 | 29.17322832 | 20.22621932 |
| Zn | 6.68024104  | 31.93739662 | 18.34795120 |



|    |             |             |             |
|----|-------------|-------------|-------------|
| O  | 6.34531897  | 32.05559389 | 20.21150090 |
| Zn | 7.94665714  | 32.67076977 | 15.70927509 |
| O  | 8.02281501  | 33.01023357 | 17.57610173 |
| Zn | 9.69222627  | 32.19141329 | 18.17997186 |
| O  | 9.65405665  | 32.08353245 | 20.22462763 |
| Zn | 11.33768821 | 32.66509625 | 15.76067071 |
| O  | 11.34986193 | 32.98370521 | 17.62248571 |
| Zn | 12.99695126 | 32.15372441 | 18.19128369 |
| O  | 12.99691163 | 32.05880765 | 20.23283558 |
| Zn | 14.65671516 | 32.66500434 | 15.76090250 |
| O  | 14.64414466 | 32.98369554 | 17.62268457 |
| Zn | 16.30172218 | 32.19142436 | 18.18036762 |
| O  | 16.33972787 | 32.08375803 | 20.22497385 |
| Zn | 18.04752849 | 32.67032850 | 15.70978534 |
| O  | 17.97119831 | 33.01035473 | 17.57642579 |
| Zn | 19.31367910 | 31.93751966 | 18.34839866 |
| O  | 19.64848870 | 32.05550296 | 20.21197306 |
| Zn | 6.71269989  | 13.04349871 | 20.99799015 |
| O  | 6.37791131  | 12.93226647 | 22.85970151 |
| Zn | 7.96328638  | 12.30493458 | 23.65834786 |
| O  | 8.00793541  | 11.94453914 | 25.51764416 |
| Zn | 9.72218819  | 12.79393757 | 20.84331982 |
| O  | 9.68562541  | 12.89274845 | 22.89086575 |
| Zn | 11.32971565 | 12.31934480 | 23.73006349 |
| O  | 11.33102582 | 11.99796773 | 25.59702026 |
| Zn | 12.99690215 | 12.82674921 | 20.85785210 |
| O  | 12.99691796 | 12.90367655 | 22.91176566 |
| Zn | 14.66392937 | 12.31941261 | 23.73056225 |
| O  | 14.66256903 | 11.99805322 | 25.59761716 |
| Zn | 16.27315510 | 12.79479310 | 20.84679675 |
| O  | 16.30880208 | 12.89358322 | 22.89360563 |
| Zn | 18.03178552 | 12.30538957 | 23.65975940 |
| O  | 17.98591139 | 11.94492030 | 25.51909810 |
| Zn | 19.28280022 | 13.04347452 | 20.99792507 |
| O  | 19.61650993 | 12.93306829 | 22.86065228 |
| Zn | 5.03309637  | 15.97571145 | 20.98997555 |
| O  | 4.74669068  | 15.83280992 | 22.85539513 |
| Zn | 6.23030545  | 14.78070500 | 23.46237038 |
| O  | 6.32045051  | 14.78515584 | 25.51340097 |
| Zn | 8.08543407  | 15.79426007 | 20.83268372 |
| O  | 8.00424139  | 15.77057589 | 22.89396824 |
| Zn | 9.64792972  | 14.84952244 | 23.47846216 |
| O  | 9.65446899  | 14.74639031 | 25.55264528 |
| Zn | 11.33881093 | 15.75453878 | 20.80425630 |
| O  | 11.32659083 | 15.76471201 | 22.89022818 |
| Zn | 12.99720439 | 14.86758515 | 23.47832823 |
| O  | 12.99679501 | 14.77316629 | 25.53981275 |

|    |             |             |             |
|----|-------------|-------------|-------------|
| Zn | 14.65644939 | 15.75409008 | 20.80358517 |
| O  | 14.66777615 | 15.76473310 | 22.89015573 |
| Zn | 16.34600481 | 14.85024443 | 23.48064383 |
| O  | 16.33901103 | 14.74702782 | 25.55463288 |
| Zn | 17.90839635 | 15.79513607 | 20.83523436 |
| O  | 17.98979460 | 15.77141944 | 22.89651567 |
| Zn | 19.76325902 | 14.78071667 | 23.46487528 |
| O  | 19.67273625 | 14.78552484 | 25.51604092 |
| Zn | 20.96419347 | 15.97900935 | 20.99952647 |
| O  | 21.24944836 | 15.83365705 | 22.86418215 |
| Zn | 3.35671689  | 18.87876279 | 20.98828465 |
| O  | 3.08838388  | 18.70500920 | 22.85408431 |
| Zn | 4.62356311  | 17.67701838 | 23.40098365 |
| O  | 4.68408104  | 17.71336017 | 25.43947124 |
| Zn | 6.43011297  | 18.71857131 | 20.81754200 |
| O  | 6.36475015  | 18.68174589 | 22.86210075 |
| Zn | 7.97740626  | 17.68538141 | 23.41834321 |
| O  | 7.97393190  | 17.68744441 | 25.52378523 |
| Zn | 9.68732764  | 18.66301780 | 20.79830396 |
| O  | 9.66312768  | 18.65183168 | 22.87945081 |
| Zn | 11.32583725 | 17.69204518 | 23.40647952 |
| O  | 11.32198748 | 17.66165746 | 25.49951151 |
| Zn | 12.99699016 | 18.64909656 | 20.78350563 |
| O  | 12.99694653 | 18.64522833 | 22.86756635 |
| Zn | 14.66794517 | 17.69198789 | 23.40667313 |
| O  | 14.67146102 | 17.66184648 | 25.49982349 |
| Zn | 16.30725398 | 18.66410025 | 20.80085284 |
| O  | 16.33106739 | 18.65239259 | 22.88139432 |
| Zn | 18.01688898 | 17.68620860 | 23.42046227 |
| O  | 18.01981063 | 17.68824839 | 25.52576832 |
| Zn | 19.56534519 | 18.71887321 | 20.81913464 |
| O  | 19.62985139 | 18.68216237 | 22.86361985 |
| Zn | 21.37092367 | 17.67947205 | 23.40565006 |
| O  | 21.30959617 | 17.71522961 | 25.44321894 |
| Zn | 22.63759589 | 18.87911109 | 20.98905096 |
| O  | 22.90576474 | 18.70574142 | 22.85486983 |
| Zn | 1.65574164  | 21.80251176 | 20.98883325 |
| O  | 1.39164648  | 21.56937629 | 22.85143048 |
| Zn | 2.91798938  | 20.51779293 | 23.45590233 |
| O  | 2.96564640  | 20.59567753 | 25.50776294 |
| Zn | 4.72494698  | 21.61673895 | 20.82743758 |
| O  | 4.66321138  | 21.55842414 | 22.88981541 |
| Zn | 6.30711033  | 20.57746711 | 23.41555673 |
| O  | 6.30577658  | 20.57601977 | 25.52165921 |
| Zn | 8.01026334  | 21.56908449 | 20.79649473 |
| O  | 7.98745502  | 21.55430034 | 22.87800663 |
| Zn | 9.65266736  | 20.58120209 | 23.37536860 |

|    |             |             |             |
|----|-------------|-------------|-------------|
| O  | 9.64951299  | 20.58075471 | 25.46836597 |
| Zn | 11.33158262 | 21.54919454 | 20.77158766 |
| O  | 11.32501000 | 21.54645691 | 22.85312673 |
| Zn | 12.99702547 | 20.57908746 | 23.35655817 |
| O  | 12.99680959 | 20.56967920 | 25.44054680 |
| Zn | 14.66291779 | 21.54920653 | 20.77161242 |
| O  | 14.66904435 | 21.54658363 | 22.85318804 |
| Zn | 16.34126824 | 20.58196920 | 23.37656421 |
| O  | 16.34405808 | 20.58132139 | 25.46928647 |
| Zn | 17.98422487 | 21.56900978 | 20.79690405 |
| O  | 18.00660796 | 21.55451393 | 22.87846154 |
| Zn | 19.68682368 | 20.57815185 | 23.41687087 |
| O  | 19.68773241 | 20.57678637 | 25.52285063 |
| Zn | 21.26948398 | 21.61686939 | 20.82825632 |
| O  | 21.33088145 | 21.55867922 | 22.89074711 |
| Zn | 23.07608776 | 20.51835768 | 23.45741771 |
| O  | 23.02809438 | 20.59628224 | 25.50921424 |
| Zn | 24.33851533 | 21.80253947 | 20.98993965 |
| O  | 24.60243481 | 21.56973406 | 22.85264034 |
| Zn | 1.64009745  | 23.25610998 | 23.64965685 |
| O  | 1.34961312  | 23.47721002 | 25.50874917 |
| Zn | 2.94504690  | 24.53297500 | 20.83524279 |
| O  | 3.01130165  | 24.45337010 | 22.88320795 |
| Zn | 4.68646990  | 23.44274508 | 23.47240592 |
| O  | 4.59924477  | 23.50234729 | 25.54691790 |
| Zn | 6.31619577  | 24.45416957 | 20.79707556 |
| O  | 6.31835572  | 24.43913788 | 22.88409468 |
| Zn | 7.98669552  | 23.47510666 | 23.40160114 |
| O  | 7.95739908  | 23.48875528 | 25.49532417 |
| Zn | 9.65202645  | 24.44287146 | 20.77824011 |
| O  | 9.64805517  | 24.44554459 | 22.86351330 |
| Zn | 11.32228097 | 23.47905094 | 23.35407001 |
| O  | 11.31319702 | 23.48526578 | 25.43855459 |
| Zn | 12.99715090 | 24.43467676 | 20.77080767 |
| O  | 12.99696987 | 24.44289252 | 22.85246546 |
| Zn | 14.67165905 | 23.47919512 | 23.35418490 |
| O  | 14.68046028 | 23.48546000 | 25.43866020 |
| Zn | 16.34223263 | 24.44280792 | 20.77838457 |
| O  | 16.34594284 | 24.44568026 | 22.86370610 |
| Zn | 18.00729490 | 23.47541593 | 23.40203490 |
| O  | 18.03627452 | 23.48921962 | 25.49574591 |
| Zn | 19.67794438 | 24.45415171 | 20.79739763 |
| O  | 19.67566736 | 24.43937026 | 22.88456474 |
| Zn | 21.30753816 | 23.44314848 | 23.47312193 |
| O  | 21.39446899 | 23.50286219 | 25.54767710 |
| Zn | 23.04900012 | 24.53300369 | 20.83590863 |
| O  | 22.98268171 | 24.45365174 | 22.88384998 |

|    |             |             |             |
|----|-------------|-------------|-------------|
| Zn | 24.35393650 | 23.25659400 | 23.65069058 |
| O  | 24.64408048 | 23.47771714 | 25.50986617 |
| Zn | 3.33602100  | 26.16459335 | 23.72057381 |
| O  | 3.05746128  | 26.32858288 | 25.58742745 |
| Zn | 4.61136031  | 27.35335789 | 20.84921721 |
| O  | 4.67635519  | 27.31620691 | 22.90321497 |
| Zn | 6.37641340  | 26.33450269 | 23.47158066 |
| O  | 6.29365034  | 26.38358918 | 25.53302917 |
| Zn | 7.97441170  | 27.32702738 | 20.79650980 |
| O  | 7.98859471  | 27.33278068 | 22.88347031 |
| Zn | 9.65758471  | 26.36969957 | 23.40084545 |
| O  | 9.63215350  | 26.38957933 | 25.49465066 |
| Zn | 11.31934871 | 27.30192501 | 20.79528069 |
| O  | 11.32106988 | 27.32974163 | 22.87692528 |
| Zn | 12.99694586 | 26.37428714 | 23.37299961 |
| O  | 12.99683588 | 26.37846163 | 25.46636376 |
| Zn | 14.67476027 | 27.30198946 | 20.79537378 |
| O  | 14.67281275 | 27.32984127 | 22.87703349 |
| Zn | 16.33632216 | 26.36986894 | 23.40099821 |
| O  | 16.36154087 | 26.38986485 | 25.49482273 |
| Zn | 18.01964952 | 27.32704909 | 20.79683463 |
| O  | 18.00536869 | 27.33302215 | 22.88386688 |
| Zn | 19.61757542 | 26.33477832 | 23.47196059 |
| O  | 19.70008239 | 26.38399659 | 25.53349394 |
| Zn | 21.38280675 | 27.35334118 | 20.84964092 |
| O  | 21.31766559 | 27.31649365 | 22.90369360 |
| Zn | 22.65802028 | 26.16500445 | 23.72117697 |
| O  | 22.93628308 | 26.32905545 | 25.58809776 |
| Zn | 5.00351741  | 29.05281911 | 23.72013478 |
| O  | 4.72323449  | 29.21379271 | 25.58700334 |
| Zn | 6.21994161  | 30.20672223 | 20.83422781 |
| O  | 6.32256450  | 30.19015900 | 22.88230641 |
| Zn | 8.03526736  | 29.24427316 | 23.47129883 |
| O  | 7.94145203  | 29.29151348 | 25.54578437 |
| Zn | 9.63500742  | 30.12390879 | 20.82579288 |
| O  | 9.65507957  | 30.20719134 | 22.88824852 |
| Zn | 11.32643213 | 29.27348451 | 23.41346000 |
| O  | 11.32881250 | 29.27652401 | 25.51993968 |
| Zn | 12.99692164 | 30.09595579 | 20.81598791 |
| O  | 12.99687458 | 30.17176707 | 22.86054510 |
| Zn | 14.66734496 | 29.27357828 | 23.41355462 |
| O  | 14.66485300 | 29.27668246 | 25.52004166 |
| Zn | 16.35884710 | 30.12408698 | 20.82605508 |
| O  | 16.33873677 | 30.20738151 | 22.88849814 |
| Zn | 17.95858849 | 29.24454053 | 23.47159969 |
| O  | 18.05225718 | 29.29189503 | 25.54614879 |
| Zn | 19.77399161 | 30.20668018 | 20.83470805 |

|    |             |             |             |
|----|-------------|-------------|-------------|
| O  | 19.67136909 | 30.19042711 | 22.88276108 |
| Zn | 20.99046050 | 29.05313654 | 23.72059928 |
| O  | 21.27051645 | 29.21426066 | 25.58751016 |
| Zn | 6.67418012  | 31.97634870 | 23.64873346 |
| O  | 6.33814790  | 32.11853777 | 25.50779473 |
| Zn | 7.93830446  | 32.68884171 | 20.98713713 |
| O  | 8.00968605  | 33.03515096 | 22.84932326 |
| Zn | 9.68327474  | 32.23906150 | 23.45459118 |
| O  | 9.64098163  | 32.15967783 | 25.50622440 |
| Zn | 11.32035397 | 32.67845206 | 20.98758399 |
| O  | 11.33842788 | 32.99813699 | 22.85315990 |
| Zn | 12.99679654 | 32.18203564 | 23.39835401 |
| O  | 12.99672629 | 32.11228538 | 25.43665032 |
| Zn | 14.67332226 | 32.67859011 | 20.98777709 |
| O  | 14.65522103 | 32.99825443 | 22.85338162 |
| Zn | 16.31042909 | 32.23922293 | 23.45481036 |
| O  | 16.35256480 | 32.15990965 | 25.50637961 |
| Zn | 18.05551407 | 32.68898422 | 20.98749263 |
| O  | 17.98410525 | 33.03538862 | 22.84967045 |
| Zn | 19.31966952 | 31.97665497 | 23.64908220 |
| O  | 19.65551937 | 32.11900560 | 25.50819242 |
| Zn | 6.67592537  | 12.99088098 | 26.32633894 |
| O  | 6.27064107  | 12.93744733 | 28.17035003 |
| Zn | 7.71995025  | 12.45072139 | 29.25370748 |
| O  | 7.70033352  | 12.47887403 | 31.19298730 |
| Zn | 9.65628359  | 12.69387167 | 26.21644848 |
| O  | 9.52416653  | 12.78757147 | 28.32045375 |
| Zn | 11.25609305 | 12.23596997 | 29.03722643 |
| O  | 11.24659703 | 12.13566391 | 30.99617250 |
| Zn | 12.99671815 | 12.75313489 | 26.19737129 |
| O  | 12.99655569 | 12.77578649 | 28.28592337 |
| Zn | 14.73689519 | 12.23630637 | 29.03772533 |
| O  | 14.74590235 | 12.13605917 | 30.99667921 |
| Zn | 16.33719936 | 12.69404972 | 26.21726858 |
| O  | 16.46899788 | 12.78802744 | 28.32140772 |
| Zn | 18.27289919 | 12.45154924 | 29.25570598 |
| O  | 18.29195212 | 12.47991291 | 31.19495794 |
| Zn | 19.31735281 | 12.99112766 | 26.32873820 |
| O  | 19.72259662 | 12.93792461 | 28.17272588 |
| Zn | 4.93565926  | 15.95246116 | 26.20478357 |
| O  | 4.54484194  | 15.77484834 | 28.04026557 |
| Zn | 6.06415926  | 14.80756408 | 28.66776927 |
| O  | 6.33312719  | 15.17766231 | 30.58590923 |
| Zn | 8.02981293  | 15.74900482 | 26.03922212 |
| O  | 7.97429863  | 15.75589358 | 28.11789476 |
| Zn | 9.62243692  | 14.78031699 | 28.57110912 |
| O  | 9.67773123  | 14.85843345 | 30.80285641 |

|    |             |             |             |
|----|-------------|-------------|-------------|
| Zn | 11.32458493 | 15.70592617 | 26.01378372 |
| O  | 11.32415741 | 15.71929522 | 28.14535619 |
| Zn | 12.99628812 | 14.76774849 | 28.63613711 |
| O  | 12.99623028 | 14.79898365 | 30.84557045 |
| Zn | 14.66847696 | 15.70632460 | 26.01466025 |
| O  | 14.66853259 | 15.71964363 | 28.14619657 |
| Zn | 16.37031733 | 14.78068872 | 28.57168438 |
| O  | 16.31479378 | 14.85906178 | 30.80368868 |
| Zn | 17.96363461 | 15.74970972 | 26.04120604 |
| O  | 18.01867380 | 15.75665080 | 28.11997323 |
| Zn | 19.92963044 | 14.80807342 | 28.66958933 |
| O  | 19.65980138 | 15.17839720 | 30.58750026 |
| Zn | 21.05786188 | 15.95308724 | 26.20613204 |
| O  | 21.44861817 | 15.77560384 | 28.04181246 |
| Zn | 3.28361770  | 18.81366193 | 26.20048223 |
| O  | 2.93372252  | 18.56450220 | 28.03613258 |
| Zn | 4.24786976  | 17.46467748 | 28.86614904 |
| O  | 4.44328199  | 17.57826101 | 31.03007889 |
| Zn | 6.33365822  | 18.66667470 | 26.08010256 |
| O  | 6.21190714  | 18.59770130 | 28.20878204 |
| Zn | 7.93212309  | 17.69105978 | 28.47575790 |
| O  | 7.95166107  | 17.80897037 | 30.69157959 |
| Zn | 9.66157029  | 18.64983809 | 25.96429161 |
| O  | 9.64702174  | 18.65513833 | 28.09043653 |
| Zn | 11.32098736 | 17.66945145 | 28.49657194 |
| O  | 11.31059981 | 17.70371900 | 30.71922577 |
| Zn | 12.99661361 | 18.63973470 | 25.95468251 |
| O  | 12.99637932 | 18.64673443 | 28.07353518 |
| Zn | 14.67181667 | 17.66985551 | 28.49714366 |
| O  | 14.68189862 | 17.70406165 | 30.71973144 |
| Zn | 16.33155609 | 18.65032919 | 25.96502625 |
| O  | 16.34569906 | 18.65570146 | 28.09118016 |
| Zn | 18.06055273 | 17.69194859 | 28.47706679 |
| O  | 18.04083843 | 17.80962358 | 30.69287958 |
| Zn | 19.65958407 | 18.66793023 | 26.08289290 |
| O  | 19.78093630 | 18.59876507 | 28.21146828 |
| Zn | 21.74578433 | 17.46497620 | 28.86844472 |
| O  | 21.54937162 | 17.57924676 | 31.03188155 |
| Zn | 22.71049698 | 18.81510220 | 26.20404130 |
| O  | 23.05997040 | 18.56554531 | 28.03956735 |
| Zn | 1.58920222  | 21.80119597 | 26.31895533 |
| O  | 1.33806206  | 21.47800105 | 28.16292909 |
| Zn | 2.85376348  | 20.36424540 | 28.66209085 |
| O  | 3.30755686  | 20.41374506 | 30.58043905 |
| Zn | 4.65447474  | 21.59446004 | 26.03451863 |
| O  | 4.63110935  | 21.54451100 | 28.11360101 |
| Zn | 6.28603633  | 20.54121632 | 28.47314660 |

|    |             |             |             |
|----|-------------|-------------|-------------|
| O  | 6.39604648  | 20.50110280 | 30.68913470 |
| Zn | 7.98265403  | 21.55719778 | 25.96156964 |
| O  | 7.97884270  | 21.54367689 | 28.08817136 |
| Zn | 9.67853047  | 20.59969844 | 28.47821948 |
| O  | 9.70030111  | 20.61352564 | 30.68410451 |
| Zn | 11.33152446 | 21.55239639 | 25.92141724 |
| O  | 11.33758749 | 21.55675663 | 28.01694810 |
| Zn | 12.99647854 | 20.58994557 | 28.51016204 |
| O  | 12.99630409 | 20.57177480 | 30.68428208 |
| Zn | 14.66173617 | 21.55270877 | 25.92190644 |
| O  | 14.65535683 | 21.55701654 | 28.01734511 |
| Zn | 16.31447843 | 20.60025529 | 28.47904307 |
| O  | 16.29226323 | 20.61396286 | 30.68490837 |
| Zn | 18.01077995 | 21.55789600 | 25.96275642 |
| O  | 18.01418484 | 21.54433857 | 28.08918503 |
| Zn | 19.70710986 | 20.54246510 | 28.47512478 |
| O  | 19.59652121 | 20.50215118 | 30.69083719 |
| Zn | 21.33907531 | 21.59514739 | 26.03580011 |
| O  | 21.36211243 | 21.54523955 | 28.11473181 |
| Zn | 23.13892525 | 20.36578160 | 28.66460508 |
| O  | 22.68479673 | 20.41522995 | 30.58284615 |
| Zn | 24.40440038 | 21.80202998 | 26.32061971 |
| O  | 24.65496283 | 21.47880712 | 28.16465148 |
| Zn | 1.64067533  | 22.97755918 | 29.24489205 |
| O  | 1.65395915  | 22.94871259 | 31.18418114 |
| Zn | 2.82235035  | 24.53061701 | 26.20763754 |
| O  | 2.83521636  | 24.37122000 | 28.31204430 |
| Zn | 4.61005953  | 23.46031854 | 28.56414894 |
| O  | 4.70369879  | 23.47069783 | 30.79605952 |
| Zn | 6.26496438  | 24.46946146 | 26.00797771 |
| O  | 6.27454889  | 24.46416624 | 28.13968651 |
| Zn | 7.96164615  | 23.48666369 | 28.49218491 |
| O  | 7.98502239  | 23.46193723 | 30.71483064 |
| Zn | 9.64127174  | 24.45054906 | 25.95038738 |
| O  | 9.64623600  | 24.44832435 | 28.06971962 |
| Zn | 11.32901849 | 23.47743984 | 28.50759068 |
| O  | 11.31219161 | 23.48790285 | 30.68194672 |
| Zn | 12.99675627 | 24.43604123 | 25.91951013 |
| O  | 12.99659754 | 24.42966733 | 28.01541859 |
| Zn | 14.66423540 | 23.47772181 | 28.50796428 |
| O  | 14.68072566 | 23.48815582 | 30.68224858 |
| Zn | 16.35227225 | 24.45086306 | 25.95070801 |
| O  | 16.34696423 | 24.44867739 | 28.06999353 |
| Zn | 18.03157385 | 23.48736414 | 28.49316144 |
| O  | 18.00790074 | 23.46267934 | 30.71570460 |
| Zn | 19.72864999 | 24.46990989 | 26.00868488 |
| O  | 19.71877068 | 24.46465076 | 28.14038598 |

|    |             |             |             |
|----|-------------|-------------|-------------|
| Zn | 21.38325607 | 23.46100013 | 28.56553838 |
| O  | 21.28934888 | 23.47187190 | 30.79731550 |
| Zn | 23.17115757 | 24.53113660 | 26.20853351 |
| O  | 23.15809880 | 24.37191132 | 28.31302013 |
| Zn | 24.35269530 | 22.97871266 | 29.24631546 |
| O  | 24.33932098 | 22.94978052 | 31.18559278 |
| Zn | 3.22315112  | 26.14753218 | 29.02712294 |
| O  | 3.13010209  | 26.19126546 | 30.98594907 |
| Zn | 4.54411900  | 27.39386902 | 26.18744228 |
| O  | 4.56146603  | 27.38441433 | 28.27645740 |
| Zn | 6.28619940  | 26.38847609 | 28.62868930 |
| O  | 6.31212828  | 26.37376816 | 30.83796099 |
| Zn | 7.93718472  | 27.36571872 | 26.00742463 |
| O  | 7.94694836  | 27.36040454 | 28.13917943 |
| Zn | 9.63724062  | 26.38823648 | 28.49089178 |
| O  | 9.67139490  | 26.38092515 | 30.71372858 |
| Zn | 11.31783221 | 27.33367022 | 25.95937547 |
| O  | 11.32850486 | 27.34447581 | 28.08620195 |
| Zn | 12.99667706 | 26.34538761 | 28.47478338 |
| O  | 12.99655423 | 26.32042412 | 30.68101152 |
| Zn | 14.67574017 | 27.33380274 | 25.95944888 |
| O  | 14.66479524 | 27.34462223 | 28.08627898 |
| Zn | 16.35610978 | 26.38857592 | 28.49121584 |
| O  | 16.32170205 | 26.38138923 | 30.71401232 |
| Zn | 18.05643566 | 27.36605219 | 26.00773255 |
| O  | 18.04639383 | 27.36080051 | 28.13949778 |
| Zn | 19.70714293 | 26.38899491 | 28.62923400 |
| O  | 19.68105523 | 26.37461950 | 30.83846993 |
| Zn | 21.44950513 | 27.39430274 | 26.18800097 |
| O  | 21.43189023 | 27.38498675 | 28.27701394 |
| Zn | 22.77013899 | 26.14824023 | 29.02795453 |
| O  | 22.86317613 | 26.19220182 | 30.98676895 |
| Zn | 4.96413255  | 29.16173201 | 29.02711455 |
| O  | 4.88039309  | 29.22081170 | 30.98592351 |
| Zn | 6.16288891  | 30.31649780 | 26.20681320 |
| O  | 6.30819302  | 30.38561033 | 28.31138507 |
| Zn | 7.98426807  | 29.30393832 | 28.56345146 |
| O  | 8.02352462  | 29.21722068 | 30.79525819 |
| Zn | 9.62148607  | 30.19785560 | 26.03268388 |
| O  | 9.65376045  | 30.24332972 | 28.11175746 |
| Zn | 11.35028598 | 29.31192794 | 28.46957091 |
| O  | 11.44163752 | 29.23696057 | 30.68573038 |
| Zn | 12.99676259 | 30.20728377 | 26.07646635 |
| O  | 12.99666738 | 30.34791904 | 28.20632764 |
| Zn | 14.64311808 | 29.31208046 | 28.46964208 |
| O  | 14.55162050 | 29.23718053 | 30.68581096 |
| Zn | 16.37209002 | 30.19811478 | 26.03288689 |



|    |             |             |             |
|----|-------------|-------------|-------------|
| O  | 16.33961112 | 30.24360317 | 28.11196167 |
| Zn | 18.00918370 | 29.30436181 | 28.56369415 |
| O  | 17.96976869 | 29.21778737 | 30.79545662 |
| Zn | 19.83072783 | 30.31691674 | 26.20719290 |
| O  | 19.68520579 | 30.38612610 | 28.31173209 |
| Zn | 21.02921430 | 29.16230589 | 29.02760744 |
| O  | 21.11291618 | 29.22159643 | 30.98640213 |
| Zn | 6.91850545  | 32.11614343 | 29.24552791 |
| O  | 6.95121609  | 32.11935280 | 31.18475582 |
| Zn | 7.90908402  | 32.74913975 | 26.31851437 |
| O  | 8.06475546  | 33.12800274 | 28.16231769 |
| Zn | 9.78764413  | 32.37260137 | 28.66058729 |
| O  | 9.97245059  | 31.95472785 | 30.57881060 |
| Zn | 11.34391481 | 32.77544208 | 26.19736278 |
| O  | 11.38539781 | 33.20364516 | 28.03298697 |
| Zn | 12.99668219 | 32.61684769 | 28.86036602 |
| O  | 12.99660604 | 32.39000789 | 31.02451876 |
| Zn | 14.64946241 | 32.77560797 | 26.19731614 |
| O  | 14.60788424 | 33.20380798 | 28.03294613 |
| Zn | 16.20568478 | 32.37288396 | 28.66061863 |
| O  | 16.02081840 | 31.95509965 | 30.57884838 |
| Zn | 18.08442053 | 32.74960770 | 26.31864075 |
| O  | 17.92854179 | 33.12843078 | 28.16247752 |
| Zn | 19.07480953 | 32.11668529 | 29.24577030 |
| O  | 19.04201528 | 32.11998288 | 31.18500397 |
| Zn | 6.20216131  | 13.57921832 | 31.84581123 |
| Zn | 9.54538769  | 12.89074713 | 31.34838377 |
| Zn | 12.99612943 | 12.81639482 | 31.30652512 |
| Zn | 16.44677139 | 12.89158947 | 31.34953037 |
| Zn | 19.78975491 | 13.58055280 | 31.84816947 |
| Zn | 4.80856613  | 15.71232723 | 31.79557859 |
| Zn | 8.07121783  | 15.87639263 | 30.78280754 |
| Zn | 11.34715734 | 15.77101804 | 30.96165864 |
| Zn | 14.64516147 | 15.77129065 | 30.96173238 |
| Zn | 17.92140660 | 15.87692899 | 30.78298635 |
| Zn | 21.18345790 | 15.71366095 | 31.79806349 |
| Zn | 3.01092869  | 18.82934451 | 31.79522126 |
| Zn | 6.12983355  | 18.55184778 | 30.75666805 |
| Zn | 9.64466365  | 18.69131545 | 30.84876149 |
| Zn | 12.99612145 | 18.64756339 | 30.90700725 |
| Zn | 16.34774308 | 18.69173371 | 30.84973801 |
| Zn | 19.86269366 | 18.55267008 | 30.75736701 |
| Zn | 22.98199717 | 18.83025878 | 31.79669297 |
| Zn | 1.85809003  | 21.10199212 | 31.83890018 |
| Zn | 4.78138691  | 21.57037686 | 30.77626846 |
| Zn | 8.00696683  | 21.52542460 | 30.84581444 |
| Zn | 11.35980007 | 21.57130076 | 31.01763582 |

|    |             |             |             |
|----|-------------|-------------|-------------|
| Zn | 14.63256404 | 21.57156303 | 31.01810662 |
| Zn | 17.98533759 | 21.52616522 | 30.84713612 |
| Zn | 21.21085790 | 21.57161420 | 30.77900233 |
| Zn | 24.13525430 | 21.10297865 | 31.84036197 |
| Zn | 2.93331914  | 24.34076102 | 31.33921478 |
| Zn | 6.32901417  | 24.45953158 | 30.95511785 |
| Zn | 9.64522239  | 24.44947419 | 30.90183138 |
| Zn | 12.99634927 | 24.40455922 | 31.01478389 |
| Zn | 16.34748719 | 24.44997062 | 30.90259671 |
| Zn | 19.66378596 | 24.46042963 | 30.95620375 |
| Zn | 23.05988967 | 24.34176496 | 31.34042272 |
| Zn | 4.59478427  | 27.36548738 | 31.29647013 |
| Zn | 7.97895922  | 27.31519219 | 30.95432304 |
| Zn | 11.35958893 | 27.32991355 | 30.84287614 |
| Zn | 14.63333449 | 27.33014519 | 30.84301377 |
| Zn | 18.01403765 | 27.31576616 | 30.95474050 |
| Zn | 21.39836091 | 27.36628893 | 31.29710800 |
| Zn | 6.38543599  | 30.31542609 | 31.33930946 |
| Zn | 9.70819635  | 30.09992790 | 30.77487828 |
| Zn | 12.99653972 | 30.44272394 | 30.74897314 |
| Zn | 16.28497156 | 30.10028503 | 30.77494666 |
| Zn | 19.60774389 | 30.31606690 | 31.33962610 |
| Zn | 8.65310310  | 32.86532836 | 31.83934865 |
| Zn | 11.19793376 | 33.00443604 | 31.79120775 |
| Zn | 14.79520790 | 33.00455663 | 31.79126249 |
| Zn | 17.34004271 | 32.86577067 | 31.83950740 |

**WZ-882**

|   |             |             |            |
|---|-------------|-------------|------------|
| O | 11.32958049 | 12.21619331 | 3.87292484 |
| O | 14.66455813 | 12.21620178 | 3.87293830 |
| O | 6.43491332  | 15.01174547 | 3.92186505 |
| O | 9.72889477  | 15.03456091 | 4.17919908 |
| O | 12.99706681 | 14.93532260 | 4.28764245 |
| O | 16.26524494 | 15.03456055 | 4.17915438 |
| O | 19.55921331 | 15.01164007 | 3.92175881 |
| O | 4.76765402  | 17.75777219 | 4.17640423 |
| O | 8.07903428  | 17.78367629 | 4.28538885 |
| O | 11.37119132 | 17.81783341 | 4.28624386 |
| O | 14.62291385 | 17.81782656 | 4.28622731 |
| O | 17.91507498 | 17.78362411 | 4.28532235 |
| O | 21.22643697 | 17.75767666 | 4.17634384 |
| O | 3.22301556  | 20.57534688 | 3.92162797 |
| O | 6.44532296  | 20.61306053 | 4.28543984 |
| O | 9.71726774  | 20.61635417 | 4.31370890 |
| O | 12.99704669 | 20.63723625 | 4.32031680 |
| O | 16.27682652 | 20.61633018 | 4.31367626 |

|    |             |             |            |
|----|-------------|-------------|------------|
| O  | 19.54876026 | 20.61301164 | 4.28540991 |
| O  | 22.77102999 | 20.57527932 | 3.92162052 |
| O  | 4.88931911  | 23.41660686 | 4.17822190 |
| O  | 8.12039951  | 23.44771330 | 4.28611273 |
| O  | 11.37503050 | 23.44646465 | 4.32024490 |
| O  | 14.61907259 | 23.44645812 | 4.32021938 |
| O  | 17.87369679 | 23.44770202 | 4.28607247 |
| O  | 21.10476909 | 23.41659939 | 4.17818385 |
| O  | 3.24857851  | 26.21239818 | 3.87189921 |
| O  | 6.43684015  | 26.29698242 | 4.28708793 |
| O  | 9.74615976  | 26.26388296 | 4.28579785 |
| O  | 12.99706284 | 26.29704109 | 4.31328736 |
| O  | 16.24794842 | 26.26388010 | 4.28574681 |
| O  | 19.55725857 | 26.29698902 | 4.28705699 |
| O  | 22.74552068 | 26.21240949 | 3.87188494 |
| O  | 4.91636839  | 29.10071179 | 3.87134667 |
| O  | 8.15734658  | 29.07748021 | 4.17794436 |
| O  | 11.36325388 | 29.13177150 | 4.28484544 |
| O  | 14.63089875 | 29.13177690 | 4.28481417 |
| O  | 17.83675746 | 29.07748095 | 4.17788515 |
| O  | 21.07772927 | 29.10071808 | 3.87133289 |
| O  | 9.78476383  | 31.94117031 | 3.92030620 |
| O  | 12.99711158 | 32.01195503 | 4.17403435 |
| O  | 16.20944674 | 31.94119627 | 3.92023336 |
| Zn | 10.06705915 | 13.24715349 | 4.66999042 |
| O  | 9.70209252  | 13.04927436 | 6.53381738 |
| Zn | 11.30190957 | 12.41432302 | 7.32895215 |
| O  | 11.33437288 | 12.04913858 | 9.18796126 |
| Zn | 12.99706387 | 12.94764307 | 4.29998809 |
| O  | 12.99707592 | 12.93686411 | 6.54584510 |
| Zn | 14.69224879 | 12.41432438 | 7.32894575 |
| O  | 14.65977775 | 12.04914150 | 9.18795403 |
| Zn | 15.92710418 | 13.24716229 | 4.66997540 |
| O  | 16.29206570 | 13.04927245 | 6.53380523 |
| Zn | 5.13310367  | 15.98656854 | 4.73173109 |
| O  | 4.71631181  | 15.81836647 | 6.58584647 |
| Zn | 6.33184562  | 15.25242688 | 7.39731952 |
| O  | 6.41330280  | 14.91898715 | 9.25717474 |
| Zn | 8.02976451  | 15.84733446 | 4.46223847 |
| O  | 8.00371973  | 15.84152014 | 6.63025318 |
| Zn | 9.63337654  | 14.90457338 | 7.21873685 |
| O  | 9.69842488  | 14.89506934 | 9.25903935 |
| Zn | 11.38420230 | 15.93350048 | 4.59486844 |
| O  | 11.32665145 | 15.85199456 | 6.71975088 |
| Zn | 12.99707516 | 14.90782023 | 7.18427350 |
| O  | 12.99707183 | 14.83535169 | 9.26558085 |
| Zn | 14.60994061 | 15.93349285 | 4.59484989 |

|    |             |             |            |
|----|-------------|-------------|------------|
| O  | 14.66749829 | 15.85198852 | 6.71973245 |
| Zn | 16.36078083 | 14.90457772 | 7.21871367 |
| O  | 16.29571331 | 14.89506977 | 9.25901190 |
| Zn | 17.96441040 | 15.84728172 | 4.46216676 |
| O  | 17.99043328 | 15.84149521 | 6.63018140 |
| Zn | 19.66229592 | 15.25238252 | 7.39725445 |
| O  | 19.58082612 | 14.91897130 | 9.25711210 |
| Zn | 20.86099863 | 15.98645975 | 4.73164892 |
| O  | 21.27782047 | 15.81831382 | 6.58576342 |
| Zn | 3.41669377  | 18.96025733 | 4.73077192 |
| O  | 3.06206066  | 18.68422717 | 6.58509250 |
| Zn | 4.61688119  | 17.67149410 | 7.24166253 |
| O  | 4.69709734  | 17.71837558 | 9.27599344 |
| Zn | 6.43638169  | 18.72152950 | 4.58390116 |
| O  | 6.32862998  | 18.66002286 | 6.72336042 |
| Zn | 8.03263071  | 17.76878957 | 7.22251604 |
| O  | 8.04267255  | 17.73198889 | 9.29508273 |
| Zn | 9.71540469  | 18.72035682 | 4.62183722 |
| O  | 9.69608413  | 18.70536758 | 6.74942018 |
| Zn | 11.34501253 | 17.75090935 | 7.28547113 |
| O  | 11.35050547 | 17.74983572 | 9.33576738 |
| Zn | 12.99705588 | 18.75684506 | 4.65253363 |
| O  | 12.99706859 | 18.71035470 | 6.76640249 |
| Zn | 14.64912692 | 17.75090508 | 7.28544961 |
| O  | 14.64363173 | 17.74983358 | 9.33574738 |
| Zn | 16.27872175 | 18.72032521 | 4.62178606 |
| O  | 16.29805447 | 18.70535167 | 6.74937728 |
| Zn | 17.96149890 | 17.76875428 | 7.22246163 |
| O  | 17.95145387 | 17.73197540 | 9.29503192 |
| Zn | 19.55772807 | 18.72146376 | 4.58383949 |
| O  | 19.66549336 | 18.65999027 | 6.72330498 |
| Zn | 21.37721997 | 17.67142968 | 7.24161025 |
| O  | 21.29702148 | 17.71834744 | 9.27594352 |
| Zn | 22.57737917 | 18.96016604 | 4.73073958 |
| O  | 22.93203203 | 18.68419479 | 6.58505978 |
| Zn | 3.37914113  | 20.36600822 | 7.39711058 |
| O  | 3.13120965  | 20.60414248 | 9.25685507 |
| Zn | 4.74397399  | 21.53887466 | 4.46239769 |
| O  | 4.72505755  | 21.51984437 | 6.63012208 |
| Zn | 6.40847075  | 20.58141455 | 7.22267160 |
| O  | 6.38143425  | 20.60938078 | 9.29508650 |
| Zn | 8.07422684  | 21.56260117 | 4.62203940 |
| O  | 8.05133261  | 21.55375803 | 6.74944498 |
| Zn | 9.69908065  | 20.60616466 | 7.29852474 |
| O  | 9.69344782  | 20.60348436 | 9.34798090 |
| Zn | 11.35279105 | 21.56077168 | 4.65741610 |
| O  | 11.35042808 | 21.55944979 | 6.77434561 |

|    |             |             |            |
|----|-------------|-------------|------------|
| Zn | 12.99706308 | 20.60832481 | 7.31632086 |
| O  | 12.99706554 | 20.61013565 | 9.36065857 |
| Zn | 14.64131079 | 21.56076620 | 4.65738758 |
| O  | 14.64369314 | 21.55944572 | 6.77432250 |
| Zn | 16.29503469 | 20.60614842 | 7.29848563 |
| O  | 16.30067546 | 20.60347443 | 9.34794554 |
| Zn | 17.91986820 | 21.56258793 | 4.62198505 |
| O  | 17.94277637 | 21.55374804 | 6.74939911 |
| Zn | 19.58562204 | 20.58138118 | 7.22262522 |
| O  | 19.61267236 | 20.60936031 | 9.29504358 |
| Zn | 21.25009191 | 21.53886453 | 4.46236174 |
| O  | 21.26903001 | 21.51982988 | 6.63008853 |
| Zn | 22.61494163 | 20.36597962 | 7.39707619 |
| O  | 22.86288441 | 20.60412431 | 9.25681678 |
| Zn | 3.51045675  | 24.60319331 | 4.66827516 |
| O  | 3.15650397  | 24.38704994 | 6.53245354 |
| Zn | 4.72811073  | 23.39962451 | 7.21876113 |
| O  | 4.75254325  | 23.46162362 | 9.25886875 |
| Zn | 6.49499181  | 24.40116798 | 4.59462430 |
| O  | 6.39529119  | 24.39250752 | 6.71937940 |
| Zn | 8.04898806  | 23.45910739 | 7.28534956 |
| O  | 8.05051924  | 23.46532870 | 9.33560603 |
| Zn | 9.74637556  | 24.38643150 | 4.65240875 |
| O  | 9.70610409  | 24.40981588 | 6.76619569 |
| Zn | 11.34989721 | 23.46104645 | 7.31625619 |
| O  | 11.35097463 | 23.46121583 | 9.36054474 |
| Zn | 12.99705753 | 24.40847706 | 4.65733923 |
| O  | 12.99706020 | 24.41125575 | 6.77419920 |
| Zn | 14.64422534 | 23.46104217 | 7.31623477 |
| O  | 14.64315156 | 23.46121047 | 9.36052523 |
| Zn | 16.24772826 | 24.38643804 | 4.65236473 |
| O  | 16.28800880 | 24.40981489 | 6.76615689 |
| Zn | 17.94511383 | 23.45909798 | 7.28530727 |
| O  | 17.94359227 | 23.46531459 | 9.33556708 |
| Zn | 19.49910103 | 24.40117930 | 4.59457963 |
| O  | 19.59880896 | 24.39250156 | 6.71933755 |
| Zn | 21.26597536 | 23.39961110 | 7.21873489 |
| O  | 21.24155354 | 23.46160830 | 9.25883567 |
| Zn | 22.48362997 | 24.60319854 | 4.66823696 |
| O  | 22.83758042 | 24.38703487 | 6.53241126 |
| Zn | 3.40621116  | 26.08987869 | 7.32790315 |
| O  | 3.10596755  | 26.30085863 | 9.18692600 |
| Zn | 4.71558069  | 27.29109684 | 4.29871337 |
| O  | 4.70593145  | 27.29702107 | 6.54480862 |
| Zn | 6.41251850  | 26.31139911 | 7.18368697 |
| O  | 6.34967623  | 26.34847304 | 9.26487303 |
| Zn | 8.10766359  | 27.19471479 | 4.59431788 |

|    |             |             |            |
|----|-------------|-------------|------------|
| O  | 8.06572936  | 27.28568919 | 6.71911981 |
| Zn | 9.70101444  | 26.32030308 | 7.28497847 |
| O  | 9.69718298  | 26.31720407 | 9.33520175 |
| Zn | 11.35574404 | 27.24631947 | 4.62127838 |
| O  | 11.35228651 | 27.27076301 | 6.74879745 |
| Zn | 12.99706599 | 26.31808293 | 7.29804189 |
| O  | 12.99706374 | 26.32556665 | 9.34744975 |
| Zn | 14.63838829 | 27.24633242 | 4.62125322 |
| O  | 14.64183504 | 27.27076549 | 6.74877240 |
| Zn | 16.29309846 | 26.32029786 | 7.28494494 |
| O  | 16.29693378 | 26.31719364 | 9.33517018 |
| Zn | 17.88643617 | 27.19472537 | 4.59427534 |
| O  | 17.92837373 | 27.28568573 | 6.71907726 |
| Zn | 19.58157626 | 26.31139252 | 7.18364581 |
| O  | 19.64442539 | 26.34845804 | 9.26483252 |
| Zn | 21.27851929 | 27.29110500 | 4.29870172 |
| O  | 21.28815992 | 27.29700361 | 6.54477087 |
| Zn | 22.58788133 | 26.08986056 | 7.32786859 |
| O  | 22.88812821 | 26.30083846 | 9.18688621 |
| Zn | 5.10111957  | 29.02646232 | 7.32763454 |
| O  | 4.76847085  | 29.18120017 | 9.18663453 |
| Zn | 6.44050310  | 29.67878992 | 4.66834462 |
| O  | 6.45093845  | 30.09415745 | 6.53218023 |
| Zn | 8.09163239  | 29.22600208 | 7.21785971 |
| O  | 8.05098856  | 29.17503688 | 9.25795917 |
| Zn | 9.71076876  | 30.14239986 | 4.46161914 |
| O  | 9.71814091  | 30.16843037 | 6.62902491 |
| Zn | 11.37266929 | 29.17975298 | 7.22124739 |
| O  | 11.33559655 | 29.19069314 | 9.29374267 |
| Zn | 12.99708640 | 30.08511956 | 4.58258324 |
| O  | 12.99707063 | 30.20931348 | 6.72201944 |
| Zn | 14.62147454 | 29.17975193 | 7.22122204 |
| O  | 14.65853050 | 29.19068778 | 9.29371948 |
| Zn | 16.28336767 | 30.14244349 | 4.46156237 |
| O  | 16.27598260 | 30.16843388 | 6.62896844 |
| Zn | 17.90246738 | 29.22599251 | 7.21782088 |
| O  | 17.94311949 | 29.17502394 | 9.25791893 |
| Zn | 19.55358144 | 29.67880027 | 4.66830286 |
| O  | 19.54315599 | 30.09415023 | 6.53213850 |
| Zn | 20.89296766 | 29.02644564 | 7.32759433 |
| O  | 21.22562849 | 29.18117990 | 9.18658893 |
| Zn | 10.04420212 | 31.91137359 | 7.39495517 |
| O  | 9.71461333  | 32.00809180 | 9.25476865 |
| Zn | 11.28062441 | 32.58110872 | 4.72888056 |
| O  | 11.34262841 | 33.02646159 | 6.58306165 |
| Zn | 12.99709875 | 32.18612383 | 7.23946129 |
| O  | 12.99707291 | 32.09442678 | 9.27369051 |

|    |             |             |             |
|----|-------------|-------------|-------------|
| Zn | 14.71360750 | 32.58111414 | 4.72885087  |
| O  | 14.65154594 | 33.02647400 | 6.58302697  |
| Zn | 15.94995874 | 31.91136683 | 7.39491335  |
| O  | 16.27952922 | 32.00808428 | 9.25473292  |
| Zn | 10.03367676 | 13.12650424 | 10.03745200 |
| O  | 9.71338194  | 13.03781579 | 11.89705758 |
| Zn | 11.29197934 | 12.39642075 | 12.72322542 |
| O  | 11.34018426 | 12.04853824 | 14.57611656 |
| Zn | 12.99707622 | 12.84314078 | 9.86460951  |
| O  | 12.99707176 | 12.95066947 | 11.89904656 |
| Zn | 14.70216815 | 12.39642270 | 12.72322021 |
| O  | 14.65395078 | 12.04854189 | 14.57611083 |
| Zn | 15.96047485 | 13.12650952 | 10.03744087 |
| O  | 16.28076240 | 13.03781656 | 11.89704777 |
| Zn | 5.07770228  | 15.96738952 | 10.08915172 |
| O  | 4.75454467  | 15.83699210 | 11.94083472 |
| Zn | 6.36831286  | 15.24843301 | 12.73998391 |
| O  | 6.45028847  | 14.92635397 | 14.59807337 |
| Zn | 8.05787116  | 15.80248842 | 9.90457234  |
| O  | 8.04954001  | 15.86253590 | 11.92995242 |
| Zn | 9.66301390  | 14.88978242 | 12.56152929 |
| O  | 9.72060789  | 14.91587600 | 14.58507410 |
| Zn | 11.38566389 | 15.84276728 | 9.87917527  |
| O  | 11.34383214 | 15.84208029 | 11.92744575 |
| Zn | 12.99706806 | 14.92660293 | 12.55326612 |
| O  | 12.99706250 | 14.85895122 | 14.58764809 |
| Zn | 14.60848112 | 15.84276840 | 9.87916489  |
| O  | 14.65030193 | 15.84208114 | 11.92743407 |
| Zn | 16.33112036 | 14.88978689 | 12.56151219 |
| O  | 16.27351474 | 14.91588170 | 14.58505608 |
| Zn | 17.93627445 | 15.80248232 | 9.90453235  |
| O  | 17.94458948 | 15.86253331 | 11.92991314 |
| Zn | 19.62581191 | 15.24842513 | 12.73994819 |
| O  | 19.54382850 | 14.92635474 | 14.59803748 |
| Zn | 20.91642515 | 15.96736326 | 10.08910537 |
| O  | 21.23957651 | 15.83697897 | 11.94078943 |
| Zn | 3.37132192  | 18.92351724 | 10.08950649 |
| O  | 3.09640462  | 18.70940800 | 11.94112250 |
| Zn | 4.63010701  | 17.67989815 | 12.58668293 |
| O  | 4.73510770  | 17.74089851 | 14.60850281 |
| Zn | 6.42574191  | 18.71678674 | 9.89323165  |
| O  | 6.36005384  | 18.67864973 | 11.93591766 |
| Zn | 8.03997514  | 17.78921806 | 12.56348266 |
| O  | 8.05741684  | 17.75369220 | 14.59885837 |
| Zn | 9.68743098  | 18.68963338 | 9.91322743  |
| O  | 9.69582999  | 18.70426812 | 11.95533567 |
| Zn | 11.34342698 | 17.74300904 | 12.56026540 |

|    |             |             |             |
|----|-------------|-------------|-------------|
| O  | 11.35308331 | 17.75746125 | 14.59820404 |
| Zn | 12.99707276 | 18.70555244 | 9.93882485  |
| O  | 12.99706630 | 18.70071438 | 11.97280206 |
| Zn | 14.65070531 | 17.74300950 | 12.56025521 |
| O  | 14.64103804 | 17.75746293 | 14.59819318 |
| Zn | 16.30670868 | 18.68962660 | 9.91319939  |
| O  | 16.29829857 | 18.70426669 | 11.95530667 |
| Zn | 17.95415119 | 17.78921228 | 12.56345006 |
| O  | 17.93670066 | 17.75369371 | 14.59882593 |
| Zn | 19.56838319 | 18.71676569 | 9.89318835  |
| O  | 19.63406829 | 18.67864094 | 11.93587575 |
| Zn | 21.36400999 | 17.67988614 | 12.58664193 |
| O  | 21.25900743 | 17.74089409 | 14.60846064 |
| Zn | 22.62278892 | 18.92349430 | 10.08946675 |
| O  | 22.89771166 | 18.70939831 | 11.94108214 |
| Zn | 3.39359482  | 20.40120883 | 12.74030572 |
| O  | 3.15563620  | 20.63367567 | 14.59831364 |
| Zn | 4.71801815  | 21.58734603 | 9.90482631  |
| O  | 4.76608003  | 21.55003042 | 11.93010947 |
| Zn | 6.42976343  | 20.57799755 | 12.56375073 |
| O  | 6.40726472  | 20.61209688 | 14.59898569 |
| Zn | 8.03298278  | 21.55534797 | 9.91328083  |
| O  | 8.05005527  | 21.55470971 | 11.95536980 |
| Zn | 9.70188055  | 20.60799419 | 12.57652456 |
| O  | 9.70163611  | 20.60873967 | 14.60990027 |
| Zn | 11.34174730 | 21.55525171 | 9.94910993  |
| O  | 11.34941689 | 21.55929042 | 11.98193582 |
| Zn | 12.99706347 | 20.60380304 | 12.58742316 |
| O  | 12.99706002 | 20.61174386 | 14.61840559 |
| Zn | 14.65238856 | 21.55524904 | 9.94909598  |
| O  | 14.64470955 | 21.55928895 | 11.98192082 |
| Zn | 16.29224284 | 20.60798960 | 12.57650399 |
| O  | 16.29248138 | 20.60873914 | 14.60987886 |
| Zn | 17.96113628 | 21.55533777 | 9.91324876  |
| O  | 17.94406274 | 21.55470488 | 11.95533667 |
| Zn | 19.56435007 | 20.57798560 | 12.56371666 |
| O  | 19.58684673 | 20.61209337 | 14.59895060 |
| Zn | 21.27608119 | 21.58732959 | 9.90479322  |
| O  | 21.22802940 | 21.55002025 | 11.93007448 |
| Zn | 22.60051651 | 20.40119871 | 12.74026521 |
| O  | 22.83847437 | 20.63367105 | 14.59827215 |
| Zn | 3.38876214  | 24.63636226 | 10.03759355 |
| O  | 3.15202397  | 24.40346996 | 11.89717156 |
| Zn | 4.73061644  | 23.43367715 | 12.56184664 |
| O  | 4.78168799  | 23.47139017 | 14.58529667 |
| Zn | 6.41661467  | 24.44968156 | 9.87911262  |
| O  | 6.39555205  | 24.41324445 | 11.92730653 |



|    |             |             |             |
|----|-------------|-------------|-------------|
| Zn | 8.04168322  | 23.46213084 | 12.56017217 |
| O  | 8.05831068  | 23.46466655 | 14.59809454 |
| Zn | 9.70138915  | 24.41359979 | 9.93854490  |
| O  | 9.69774203  | 24.41551295 | 11.97251337 |
| Zn | 11.34592177 | 23.46386031 | 12.58725164 |
| O  | 11.35201290 | 23.46135473 | 14.61822618 |
| Zn | 12.99706819 | 24.42242439 | 9.94886476  |
| O  | 12.99706291 | 24.41325707 | 11.98167747 |
| Zn | 14.64820155 | 23.46385734 | 12.58724243 |
| O  | 14.64210585 | 23.46135314 | 14.61821608 |
| Zn | 16.29273625 | 24.41359476 | 9.93852073  |
| O  | 16.29637778 | 24.41550757 | 11.97248896 |
| Zn | 17.95243131 | 23.46212258 | 12.56014887 |
| O  | 17.93580250 | 23.46466266 | 14.59806889 |
| Zn | 19.57748863 | 24.44967411 | 9.87908161  |
| O  | 19.59855746 | 24.41323534 | 11.92727347 |
| Zn | 21.26348919 | 23.43366556 | 12.56181500 |
| O  | 21.21242052 | 23.47138299 | 14.58526369 |
| Zn | 22.60533727 | 24.63634447 | 10.03756123 |
| O  | 22.84208321 | 24.40345511 | 11.89713792 |
| Zn | 3.38584427  | 26.09127450 | 12.72346047 |
| O  | 3.10825432  | 26.30739040 | 14.57617947 |
| Zn | 4.62421157  | 27.34456205 | 9.86390385  |
| O  | 4.71784951  | 27.29085138 | 11.89841297 |
| Zn | 6.42910454  | 26.30277811 | 12.55301154 |
| O  | 6.37017910  | 26.33765287 | 14.58721479 |
| Zn | 8.02782600  | 27.24009157 | 9.87841146  |
| O  | 8.04860097  | 27.27659958 | 11.92671460 |
| Zn | 9.69518496  | 26.32643670 | 12.55965519 |
| O  | 9.70230186  | 26.31219234 | 14.59756783 |
| Zn | 11.34249737 | 27.28778560 | 9.91252705  |
| O  | 11.35131929 | 27.27291086 | 11.95457137 |
| Zn | 12.99706374 | 26.31569518 | 12.57590091 |
| O  | 12.99706076 | 26.31708995 | 14.60924777 |
| Zn | 14.65163434 | 27.28778496 | 9.91251146  |
| O  | 14.64280513 | 27.27290829 | 11.95455709 |
| Zn | 16.29893510 | 26.32643027 | 12.55963689 |
| O  | 16.29181608 | 26.31218776 | 14.59754855 |
| Zn | 17.96628682 | 27.24008355 | 9.87837874  |
| O  | 17.94551268 | 27.27659033 | 11.92668226 |
| Zn | 19.56500888 | 26.30277023 | 12.55297884 |
| O  | 19.62393313 | 26.33764585 | 14.58718402 |
| Zn | 21.36989013 | 27.34454544 | 9.86386804  |
| O  | 21.27625938 | 27.29083574 | 11.89837628 |
| Zn | 22.60826744 | 26.09126010 | 12.72342675 |
| O  | 22.88585698 | 26.30737873 | 14.57614394 |
| Zn | 5.09061930  | 29.04474151 | 12.72246468 |

|    |             |             |             |
|----|-------------|-------------|-------------|
| O  | 4.76494259  | 29.17745709 | 14.57525046 |
| Zn | 6.35168799  | 29.76878218 | 10.03650590 |
| O  | 6.43529668  | 30.09094746 | 11.89594835 |
| Zn | 8.06439866  | 29.20843264 | 12.56027405 |
| O  | 8.05785686  | 29.14658020 | 14.58387099 |
| Zn | 9.65697278  | 30.14247960 | 9.90318533  |
| O  | 9.71338667  | 30.11971263 | 11.92845212 |
| Zn | 11.38670199 | 29.16456451 | 12.56225633 |
| O  | 11.34672909 | 29.16849818 | 14.59750197 |
| Zn | 12.99707003 | 30.09840638 | 9.89147941  |
| O  | 12.99706328 | 30.17445212 | 11.93423264 |
| Zn | 14.60742548 | 29.16456092 | 12.56224568 |
| O  | 14.64739332 | 29.16849539 | 14.59749150 |
| Zn | 16.33715117 | 30.14247819 | 9.90315644  |
| O  | 16.28073331 | 30.11970906 | 11.92842469 |
| Zn | 17.92971720 | 29.20842327 | 12.56024491 |
| O  | 17.93626067 | 29.14657543 | 14.58384331 |
| Zn | 19.64241748 | 29.76877040 | 10.03646799 |
| O  | 19.55881649 | 30.09093187 | 11.89591045 |
| Zn | 20.90349576 | 29.04472780 | 12.72242867 |
| O  | 21.22917256 | 29.17744595 | 14.57521360 |
| Zn | 10.02208256 | 31.88318104 | 12.73767110 |
| O  | 9.70211436  | 31.97389590 | 14.59571671 |
| Zn | 11.29041157 | 32.64071562 | 10.08657974 |
| O  | 11.33882815 | 32.98600134 | 11.93818634 |
| Zn | 12.99707004 | 32.17223298 | 12.58398132 |
| O  | 12.99706236 | 32.05198678 | 14.60588413 |
| Zn | 14.70374224 | 32.64071431 | 10.08655705 |
| O  | 14.65530515 | 32.98599771 | 11.93816420 |
| Zn | 15.97204768 | 31.88317501 | 12.73765080 |
| O  | 16.29200740 | 31.97389231 | 14.59569806 |
| Zn | 10.02812595 | 13.14537152 | 15.38870661 |
| O  | 9.70747290  | 13.05598852 | 17.24742485 |
| Zn | 11.28693417 | 12.40605771 | 18.06592625 |
| O  | 11.33939502 | 12.05396556 | 19.91823133 |
| Zn | 12.99706809 | 12.85102018 | 15.23226719 |
| O  | 12.99706530 | 12.97451864 | 17.25724983 |
| Zn | 14.70720144 | 12.40606079 | 18.06591842 |
| O  | 14.65474314 | 12.05396876 | 19.91822356 |
| Zn | 15.96600855 | 13.14538002 | 15.38869627 |
| O  | 16.28665935 | 13.05599346 | 17.24741477 |
| Zn | 5.09962652  | 15.97454269 | 15.41256175 |
| O  | 4.76743456  | 15.84484886 | 17.26455766 |
| Zn | 6.38008280  | 15.25819761 | 18.06436327 |
| O  | 6.46051538  | 14.93460622 | 19.92318890 |
| Zn | 8.07854581  | 15.81998287 | 15.24037069 |
| O  | 8.06541898  | 15.88364597 | 17.26090977 |

|    |             |             |             |
|----|-------------|-------------|-------------|
| Zn | 9.66885693  | 14.90644345 | 17.90406269 |
| O  | 9.72745935  | 14.92820585 | 19.92414078 |
| Zn | 11.39003144 | 15.86730232 | 15.22229447 |
| O  | 11.34978215 | 15.86146097 | 17.25609122 |
| Zn | 12.99706317 | 14.94098648 | 17.89946657 |
| O  | 12.99706540 | 14.87084781 | 19.92781458 |
| Zn | 14.60409375 | 15.86730534 | 15.22228663 |
| O  | 14.64434047 | 15.86146301 | 17.25608271 |
| Zn | 16.32526864 | 14.90645029 | 17.90404939 |
| O  | 16.26666977 | 14.92821255 | 19.92412649 |
| Zn | 17.91557862 | 15.81998890 | 15.24034545 |
| O  | 17.92870209 | 15.88365142 | 17.26088335 |
| Zn | 19.61403843 | 15.25820006 | 18.06433437 |
| O  | 19.53360941 | 14.93461024 | 19.92315938 |
| Zn | 20.89449150 | 15.97454132 | 15.41252648 |
| O  | 21.22668308 | 15.84484962 | 17.26452128 |
| Zn | 3.38804977  | 18.93980801 | 15.41292039 |
| O  | 3.10916401  | 18.71767095 | 17.26489738 |
| Zn | 4.63447230  | 17.68305715 | 17.91122420 |
| O  | 4.74384972  | 17.74654419 | 19.93500921 |
| Zn | 6.44105664  | 18.72613834 | 15.24293355 |
| O  | 6.37849364  | 18.68991577 | 17.27025534 |
| Zn | 8.05620609  | 17.80252365 | 17.89783158 |
| O  | 8.06782171  | 17.76360108 | 19.92894857 |
| Zn | 9.70492979  | 18.70502557 | 15.22499274 |
| O  | 9.70823066  | 18.71639941 | 17.25914535 |
| Zn | 11.35087363 | 17.75997083 | 17.88864802 |
| O  | 11.35738218 | 17.76867378 | 19.92130517 |
| Zn | 12.99706246 | 18.71307696 | 15.22836270 |
| O  | 12.99706038 | 18.71025249 | 17.26077209 |
| Zn | 14.64324983 | 17.75997268 | 17.88863951 |
| O  | 14.63674620 | 17.76867607 | 19.92129669 |
| Zn | 16.28919308 | 18.70502693 | 15.22497469 |
| O  | 16.28588967 | 18.71640162 | 17.25912564 |
| Zn | 17.93791605 | 17.80252719 | 17.89780724 |
| O  | 17.92630453 | 17.76360585 | 19.92892387 |
| Zn | 19.55306066 | 18.72613701 | 15.24289975 |
| O  | 19.61562428 | 18.68991705 | 17.27022049 |
| Zn | 21.35964655 | 17.68305816 | 17.91118808 |
| O  | 21.25027383 | 17.74654612 | 19.93497229 |
| Zn | 22.60606368 | 18.93980337 | 15.41287940 |
| O  | 22.88495261 | 18.71767063 | 17.26485539 |
| Zn | 3.40755921  | 20.40757718 | 18.06465248 |
| O  | 3.16753072  | 20.63939859 | 19.92343849 |
| Zn | 4.74325068  | 21.59747690 | 15.24091456 |
| O  | 4.79206277  | 21.55425319 | 17.26131189 |
| Zn | 6.44908709  | 20.58634252 | 17.89819807 |

|    |             |             |             |
|----|-------------|-------------|-------------|
| O  | 6.42065324  | 20.61703205 | 19.92917145 |
| Zn | 8.05465022  | 21.56378343 | 15.22506537 |
| O  | 8.06635287  | 21.56040344 | 17.25921435 |
| Zn | 9.71438589  | 20.61580916 | 17.89400863 |
| O  | 9.70939114  | 20.61379562 | 19.92417161 |
| Zn | 11.34835423 | 21.55975255 | 15.23478820 |
| O  | 11.35416141 | 21.56273428 | 17.26580848 |
| Zn | 12.99706075 | 20.60967434 | 17.89161978 |
| O  | 12.99706419 | 20.61635747 | 19.92240445 |
| Zn | 14.64576854 | 21.55975177 | 15.23477989 |
| O  | 14.63995852 | 21.56273401 | 17.26579886 |
| Zn | 16.27973572 | 20.61580996 | 17.89399280 |
| O  | 16.28473645 | 20.61379750 | 19.92415542 |
| Zn | 17.93946687 | 21.56378165 | 15.22504163 |
| O  | 17.92776493 | 21.56040347 | 17.25918904 |
| Zn | 19.54503151 | 20.58634172 | 17.89816796 |
| O  | 19.57347118 | 20.61703349 | 19.92914084 |
| Zn | 21.25086143 | 21.59746951 | 15.24087846 |
| O  | 21.20205285 | 21.55425036 | 17.26127523 |
| Zn | 22.58655901 | 20.40757629 | 18.06461261 |
| O  | 22.82659248 | 20.63939826 | 19.92339730 |
| Zn | 3.40237123  | 24.62296257 | 15.38927635 |
| O  | 3.16465009  | 24.39023076 | 17.24798507 |
| Zn | 4.74784733  | 23.43141815 | 17.90469721 |
| O  | 4.79556899  | 23.47213975 | 19.92465833 |
| Zn | 6.44004608  | 24.44217818 | 15.22243316 |
| O  | 6.41512136  | 24.40979450 | 17.25616182 |
| Zn | 8.05982364  | 23.46111297 | 17.88866709 |
| O  | 8.06984902  | 23.46372777 | 19.92132336 |
| Zn | 9.70768152  | 24.41097560 | 15.22811497 |
| O  | 9.70561895  | 24.41189149 | 17.26051495 |
| Zn | 11.35055139 | 23.46198487 | 17.89147800 |
| O  | 11.35553846 | 23.46004729 | 19.92226122 |
| Zn | 12.99706150 | 24.41576181 | 15.23450774 |
| O  | 12.99706038 | 24.40871750 | 17.26552696 |
| Zn | 14.64357055 | 23.46198436 | 17.89147115 |
| O  | 14.63859074 | 23.46004724 | 19.92225403 |
| Zn | 16.28643874 | 24.41097350 | 15.22810051 |
| O  | 16.28850054 | 24.41188971 | 17.26049950 |
| Zn | 17.93429685 | 23.46111143 | 17.88864721 |
| O  | 17.92427846 | 23.46372776 | 19.92130249 |
| Zn | 19.55406734 | 24.44217379 | 15.22240614 |
| O  | 19.57899600 | 24.40979164 | 17.25613336 |
| Zn | 21.24627014 | 23.43141307 | 17.90466602 |
| O  | 21.19855547 | 23.47213702 | 19.92462752 |
| Zn | 22.59174104 | 24.62295023 | 15.38924235 |
| O  | 22.82946715 | 24.39022235 | 17.24795046 |

|    |             |             |             |
|----|-------------|-------------|-------------|
| Zn | 3.39160960  | 26.08314071 | 18.06639981 |
| O  | 3.11236017  | 26.30506654 | 19.91853778 |
| Zn | 4.63126989  | 27.34164981 | 15.23221194 |
| O  | 4.73856059  | 27.28000787 | 17.25713820 |
| Zn | 6.44156823  | 26.29664623 | 17.89949918 |
| O  | 6.38027776  | 26.33272127 | 19.92766883 |
| Zn | 8.04687070  | 27.22534619 | 15.22160803 |
| O  | 8.06223005  | 27.26298265 | 17.25545558 |
| Zn | 9.70587863  | 26.31263866 | 17.88810604 |
| O  | 9.70952470  | 26.30394023 | 19.92077466 |
| Zn | 11.34665733 | 27.26636466 | 15.22419368 |
| O  | 11.35517968 | 27.25747406 | 17.25832626 |
| Zn | 12.99706327 | 26.30226742 | 17.89336630 |
| O  | 12.99706609 | 26.30901403 | 19.92353623 |
| Zn | 14.64746725 | 27.26636290 | 15.22418531 |
| O  | 14.63894440 | 27.25747253 | 17.25831838 |
| Zn | 16.28824598 | 26.31263677 | 17.88809325 |
| O  | 16.28460652 | 26.30393908 | 19.92076104 |
| Zn | 17.94724793 | 27.22534318 | 15.22158481 |
| O  | 17.93189082 | 27.26297953 | 17.25543236 |
| Zn | 19.55255406 | 26.29664316 | 17.89947191 |
| O  | 19.61385003 | 26.33271802 | 19.92764354 |
| Zn | 21.36284338 | 27.34163894 | 15.23217885 |
| O  | 21.25555863 | 27.28000059 | 17.25710605 |
| Zn | 22.60251146 | 26.08313324 | 18.06636537 |
| O  | 22.88176648 | 26.30505931 | 19.91850171 |
| Zn | 5.10148500  | 29.04551713 | 18.06543266 |
| O  | 4.76985769  | 29.17651841 | 19.91761817 |
| Zn | 6.37089579  | 29.76533969 | 15.38781064 |
| O  | 6.45387519  | 30.08817232 | 17.24641278 |
| Zn | 8.07574475  | 29.19623235 | 17.90300796 |
| O  | 8.06482616  | 29.13560587 | 19.92315924 |
| Zn | 9.66142395  | 30.11735337 | 15.23891508 |
| O  | 9.72336961  | 30.09680272 | 17.25940447 |
| Zn | 11.38970859 | 29.14523616 | 17.89655953 |
| O  | 11.34971247 | 29.15575341 | 19.92762371 |
| Zn | 12.99706365 | 30.08228907 | 15.24103091 |
| O  | 12.99706316 | 30.15446145 | 17.26848279 |
| Zn | 14.60442028 | 29.14523499 | 17.89655197 |
| O  | 14.64442165 | 29.15575256 | 19.92761638 |
| Zn | 16.33270026 | 30.11735138 | 15.23889714 |
| O  | 16.27075577 | 30.09680146 | 17.25938788 |
| Zn | 17.91838106 | 29.19622995 | 17.90298700 |
| O  | 17.92930650 | 29.13560461 | 19.92314001 |
| Zn | 19.62322365 | 29.76533359 | 15.38778080 |
| O  | 19.54024831 | 30.08816452 | 17.24638292 |
| Zn | 20.89264078 | 29.04550986 | 18.06540383 |

|    |             |             |             |
|----|-------------|-------------|-------------|
| O  | 21.22427264 | 29.17651185 | 19.91758775 |
| Zn | 10.02424235 | 31.86948570 | 18.06210908 |
| O  | 9.70376094  | 31.96210790 | 19.92092304 |
| Zn | 11.28529185 | 32.61977131 | 15.40996213 |
| O  | 11.33865564 | 32.97241154 | 17.26193184 |
| Zn | 12.99706580 | 32.16843976 | 17.90866600 |
| O  | 12.99706674 | 32.04297129 | 19.93254776 |
| Zn | 14.70883579 | 32.61977041 | 15.40995252 |
| O  | 14.65547246 | 32.97241023 | 17.26192233 |
| Zn | 15.96988739 | 31.86948321 | 18.06209576 |
| O  | 16.29037154 | 31.96210645 | 19.92090937 |
| Zn | 10.02737842 | 13.15401030 | 20.72548741 |
| O  | 9.70651475  | 13.06321798 | 22.58412947 |
| Zn | 11.28629094 | 12.41002269 | 23.39961406 |
| O  | 11.33927989 | 12.05738470 | 25.25192240 |
| Zn | 12.99707018 | 12.85611943 | 20.56876360 |
| O  | 12.99707190 | 12.98142441 | 22.59383285 |
| Zn | 14.70785795 | 12.41002495 | 23.39960600 |
| O  | 14.65488016 | 12.05738720 | 25.25191494 |
| Zn | 15.96675985 | 13.15401664 | 20.72547428 |
| O  | 16.28762893 | 13.06322256 | 22.58411567 |
| Zn | 5.10541434  | 15.97804211 | 20.73695047 |
| O  | 4.77192653  | 15.84821835 | 22.58927558 |
| Zn | 6.38144151  | 15.26190104 | 23.39409187 |
| O  | 6.46238251  | 14.93846377 | 25.25285267 |
| Zn | 8.08196768  | 15.82891520 | 20.57387241 |
| O  | 8.06825559  | 15.89038173 | 22.59352753 |
| Zn | 9.66986582  | 14.91285800 | 23.23934165 |
| O  | 9.72880016  | 14.93274713 | 25.25886250 |
| Zn | 11.39221984 | 15.88009175 | 20.56113247 |
| O  | 11.35130783 | 15.87008805 | 22.59212660 |
| Zn | 12.99707139 | 14.94533374 | 23.23540742 |
| O  | 12.99707764 | 14.87501617 | 25.26300314 |
| Zn | 14.60191102 | 15.88009513 | 20.56112653 |
| O  | 14.64283175 | 15.87008999 | 22.59212007 |
| Zn | 16.32427715 | 14.91286204 | 23.23933036 |
| O  | 16.26535457 | 14.93275174 | 25.25885127 |
| Zn | 17.91216332 | 15.82892201 | 20.57385332 |
| O  | 17.92588349 | 15.89038705 | 22.59350792 |
| Zn | 19.61269989 | 15.26190662 | 23.39406949 |
| O  | 19.53176916 | 14.93847006 | 25.25283039 |
| Zn | 20.88871229 | 15.97804591 | 20.73691833 |
| O  | 21.22220876 | 15.84822243 | 22.58924110 |
| Zn | 3.39351628  | 18.94406946 | 20.73730811 |
| O  | 3.11386745  | 18.72084739 | 22.58961885 |
| Zn | 4.63681050  | 17.68500454 | 23.23801955 |
| O  | 4.74587035  | 17.74824969 | 25.26320977 |

|    |             |             |             |
|----|-------------|-------------|-------------|
| Zn | 6.44544806  | 18.72925249 | 20.57192878 |
| O  | 6.38330882  | 18.69328364 | 22.59937510 |
| Zn | 8.05924799  | 17.80743891 | 23.23028929 |
| O  | 8.07042381  | 17.76732187 | 25.26096184 |
| Zn | 9.71061276  | 18.71411915 | 20.55802028 |
| O  | 9.71237964  | 18.72237511 | 22.58913105 |
| Zn | 11.35282569 | 17.76624354 | 23.22521954 |
| O  | 11.35871208 | 17.77314522 | 25.25571183 |
| Zn | 12.99706589 | 18.72470114 | 20.55936333 |
| O  | 12.99706972 | 18.71722121 | 22.58838403 |
| Zn | 14.64131569 | 17.76624472 | 23.22521429 |
| O  | 14.63544116 | 17.77314653 | 25.25570680 |
| Zn | 16.28351723 | 18.71412225 | 20.55800698 |
| O  | 16.28175877 | 18.72237760 | 22.58911680 |
| Zn | 17.93489262 | 17.80744294 | 23.23027282 |
| O  | 17.92372766 | 17.76732602 | 25.26094558 |
| Zn | 19.54867806 | 18.72925629 | 20.57190252 |
| O  | 19.61082729 | 18.69328663 | 22.59934790 |
| Zn | 21.35732994 | 17.68500664 | 23.23799023 |
| O  | 21.24827975 | 17.74825245 | 25.26318096 |
| Zn | 22.60060837 | 18.94407017 | 20.73726914 |
| O  | 22.88026695 | 18.72084981 | 22.58957806 |
| Zn | 3.41104243  | 20.40783809 | 23.39445681 |
| O  | 3.17142656  | 20.63993448 | 25.25320016 |
| Zn | 4.75230249  | 21.59691542 | 20.57453733 |
| O  | 4.79891081  | 21.55428165 | 22.59405352 |
| Zn | 6.45443144  | 20.58739558 | 23.23071680 |
| O  | 6.42476914  | 20.61822052 | 25.26125584 |
| Zn | 8.06491745  | 21.56511058 | 20.55817820 |
| O  | 8.07313950  | 21.56195020 | 22.58928166 |
| Zn | 9.71968726  | 20.61944786 | 23.22827596 |
| O  | 9.71266921  | 20.61620549 | 25.25633190 |
| Zn | 11.35333202 | 21.56329095 | 20.55662097 |
| O  | 11.35709581 | 21.56507657 | 22.58617495 |
| Zn | 12.99707013 | 20.61405497 | 23.22454284 |
| O  | 12.99707627 | 20.61912856 | 25.25305766 |
| Zn | 14.64079941 | 21.56329112 | 20.55661467 |
| O  | 14.63704318 | 21.56507672 | 22.58616786 |
| Zn | 16.27445355 | 20.61944949 | 23.22826521 |
| O  | 16.28148292 | 20.61620716 | 25.25632158 |
| Zn | 17.92921105 | 21.56511176 | 20.55815913 |
| O  | 17.92099807 | 21.56195120 | 22.58926214 |
| Zn | 19.53970781 | 20.58739656 | 23.23069530 |
| O  | 19.56938070 | 20.61822212 | 25.26123468 |
| Zn | 21.24182415 | 21.59691309 | 20.57450554 |
| O  | 21.19522523 | 21.55428059 | 22.59402266 |
| Zn | 22.58309610 | 20.40783735 | 23.39442353 |

|    |             |             |             |
|----|-------------|-------------|-------------|
| O  | 22.82272021 | 20.63993387 | 25.25316533 |
| Zn | 3.40924374  | 24.61905012 | 20.72623639 |
| O  | 3.17015041  | 24.38678784 | 22.58487396 |
| Zn | 4.75357300  | 23.43001936 | 23.24015424 |
| O  | 4.79984675  | 23.47186824 | 25.25957652 |
| Zn | 6.45196581  | 24.43868964 | 20.56151783 |
| O  | 6.42302221  | 24.40778603 | 22.59243783 |
| Zn | 8.06586222  | 23.46059191 | 23.22540349 |
| O  | 8.07402690  | 23.46346301 | 25.25589729 |
| Zn | 9.71733187  | 24.40624305 | 20.55922722 |
| O  | 9.71121827  | 24.40944166 | 22.58824354 |
| Zn | 11.35386737 | 23.46076250 | 23.22446464 |
| O  | 11.35750990 | 23.45952065 | 25.25298430 |
| Zn | 12.99706633 | 24.41085159 | 20.55637748 |
| O  | 12.99707003 | 24.40611675 | 22.58593488 |
| Zn | 14.64027404 | 23.46076267 | 23.22445981 |
| O  | 14.63664334 | 23.45952072 | 25.25297965 |
| Zn | 16.27680024 | 24.40624248 | 20.55921571 |
| O  | 16.28292162 | 24.40944054 | 22.58823186 |
| Zn | 17.92827918 | 23.46059159 | 23.22538958 |
| O  | 17.92012532 | 23.46346264 | 25.25588337 |
| Zn | 19.54216300 | 24.43868834 | 20.56149564 |
| O  | 19.57111628 | 24.40778442 | 22.59241488 |
| Zn | 21.24056720 | 23.43001636 | 23.24012859 |
| O  | 21.19430351 | 23.47186601 | 25.25955249 |
| Zn | 22.58488484 | 24.61904349 | 20.72620343 |
| O  | 22.82398631 | 24.38678371 | 22.58484007 |
| Zn | 3.39449185  | 26.08157208 | 23.40032138 |
| O  | 3.11502040  | 26.30412352 | 25.25248740 |
| Zn | 4.63546862  | 27.34017819 | 20.56893670 |
| O  | 4.74428737  | 27.27757788 | 22.59398526 |
| Zn | 6.44504939  | 26.29545340 | 23.23570023 |
| O  | 6.38359351  | 26.33150602 | 25.26314082 |
| Zn | 8.05657128  | 27.21817360 | 20.56068893 |
| O  | 8.06861181  | 27.25842131 | 22.59174455 |
| Zn | 9.70997167  | 26.30882338 | 23.22487707 |
| O  | 9.71238262  | 26.30145750 | 25.25539650 |
| Zn | 11.35124174 | 27.25813577 | 20.55731445 |
| O  | 11.35782339 | 27.25204547 | 22.58843134 |
| Zn | 12.99707246 | 26.29695152 | 23.22772733 |
| O  | 12.99707738 | 26.30592706 | 25.25581127 |
| Zn | 14.64289328 | 27.25813485 | 20.55730799 |
| O  | 14.63631937 | 27.25204429 | 22.58842549 |
| Zn | 16.28417187 | 26.30882233 | 23.22486804 |
| O  | 16.28177126 | 26.30145588 | 25.25538725 |
| Zn | 17.93756198 | 27.21817274 | 20.56067179 |
| O  | 17.92552899 | 27.25841965 | 22.59172739 |



|    |             |             |             |
|----|-------------|-------------|-------------|
| Zn | 19.54909319 | 26.29545159 | 23.23567990 |
| O  | 19.61055760 | 26.33150255 | 25.26312252 |
| Zn | 21.35866129 | 27.34017110 | 20.56890728 |
| O  | 21.24985123 | 27.27757320 | 22.59395801 |
| Zn | 22.59964908 | 26.08156691 | 23.40029170 |
| O  | 22.87912823 | 26.30411721 | 25.25245639 |
| Zn | 5.10499028  | 29.04506756 | 23.39949676 |
| O  | 4.77262296  | 29.17578036 | 25.25169713 |
| Zn | 6.37850456  | 29.76275628 | 20.72495756 |
| O  | 6.46031286  | 30.08643463 | 22.58349035 |
| Zn | 8.08049427  | 29.19318446 | 23.23863957 |
| O  | 8.06777055  | 29.13309238 | 25.25824758 |
| Zn | 9.66710849  | 30.11115587 | 20.57259564 |
| O  | 9.72738018  | 30.09212572 | 22.59224201 |
| Zn | 11.39201466 | 29.14126838 | 23.22924114 |
| O  | 11.35124101 | 29.15261175 | 25.25989316 |
| Zn | 12.99706844 | 30.07826779 | 20.57011596 |
| O  | 12.99707227 | 30.14980825 | 22.59774272 |
| Zn | 14.60213232 | 29.14126789 | 23.22923582 |
| O  | 14.64291566 | 29.15261058 | 25.25988800 |
| Zn | 16.32702780 | 30.11115486 | 20.57258182 |
| O  | 16.26676403 | 30.09212465 | 22.59222974 |
| Zn | 17.91365041 | 29.19318309 | 23.23862456 |
| O  | 17.92638480 | 29.13309008 | 25.25823411 |
| Zn | 19.61563034 | 29.76275249 | 20.72493616 |
| O  | 19.53382984 | 30.08642982 | 22.58346896 |
| Zn | 20.88915431 | 29.04506218 | 23.39947483 |
| O  | 21.22152941 | 29.17577349 | 25.25167337 |
| Zn | 10.02634565 | 31.86752691 | 23.39225018 |
| O  | 9.70579524  | 31.95949507 | 25.25101458 |
| Zn | 11.28490285 | 32.61422991 | 20.73465982 |
| O  | 11.33881529 | 32.96795545 | 22.58697627 |
| Zn | 12.99707465 | 32.16658306 | 23.23582299 |
| O  | 12.99707862 | 32.04138626 | 25.26112807 |
| Zn | 14.70923358 | 32.61422923 | 20.73465255 |
| O  | 14.65533092 | 32.96795484 | 22.58696939 |
| Zn | 15.96780289 | 31.86752585 | 23.39223908 |
| O  | 16.28836081 | 31.95949255 | 25.25100241 |
| Zn | 10.02702813 | 13.15705987 | 26.05868593 |
| O  | 9.70649886  | 13.06605912 | 27.91736643 |
| Zn | 11.28603491 | 12.41135927 | 28.73218277 |
| O  | 11.33919226 | 12.05911869 | 30.58454903 |
| Zn | 12.99708120 | 12.85839102 | 25.90225016 |
| O  | 12.99708520 | 12.98385222 | 27.92741154 |
| Zn | 14.70813993 | 12.41136115 | 28.73217776 |
| O  | 14.65499077 | 12.05912152 | 30.58454451 |
| Zn | 15.96713264 | 13.15706336 | 26.05867460 |

|    |             |             |             |
|----|-------------|-------------|-------------|
| O  | 16.28767031 | 13.06606234 | 27.91735404 |
| Zn | 5.10613685  | 15.98005615 | 26.06721210 |
| O  | 4.77340879  | 15.85000721 | 27.91954121 |
| Zn | 6.38162629  | 15.26305835 | 28.72619715 |
| O  | 6.46274753  | 14.94007651 | 30.58494592 |
| Zn | 8.08228267  | 15.83219409 | 25.90668075 |
| O  | 8.06870545  | 15.89272634 | 27.92629809 |
| Zn | 9.67000194  | 14.91514810 | 28.57297027 |
| O  | 9.72894401  | 14.93453312 | 30.59252356 |
| Zn | 11.39274372 | 15.88366335 | 25.89652304 |
| O  | 11.35175271 | 15.87308599 | 27.92695147 |
| Zn | 12.99708449 | 14.94681295 | 28.56983049 |
| O  | 12.99708888 | 14.87673418 | 30.59723409 |
| Zn | 14.60141248 | 15.88366494 | 25.89651917 |
| O  | 14.64241423 | 15.87308686 | 27.92694754 |
| Zn | 16.32416754 | 14.91514987 | 28.57296372 |
| O  | 16.26523407 | 14.93453618 | 30.59251775 |
| Zn | 17.91187292 | 15.83219935 | 25.90666882 |
| O  | 17.92546092 | 15.89273049 | 27.92628640 |
| Zn | 19.61254198 | 15.26306541 | 28.72618620 |
| O  | 19.53142830 | 14.94008487 | 30.58493526 |
| Zn | 20.88801576 | 15.98006084 | 26.06719031 |
| O  | 21.22075341 | 15.85001267 | 27.91951739 |
| Zn | 3.39521007  | 18.94452553 | 26.06763362 |
| O  | 3.11578063  | 18.72199035 | 27.91994539 |
| Zn | 4.63750270  | 17.68586312 | 28.57012574 |
| O  | 4.74627475  | 17.74886974 | 30.59554551 |
| Zn | 6.44607689  | 18.73013243 | 25.90398637 |
| O  | 6.38451440  | 18.69445508 | 27.93143362 |
| Zn | 8.05960448  | 17.80887247 | 28.56449424 |
| O  | 8.07101575  | 17.76878231 | 30.59502563 |
| Zn | 9.71126456  | 18.71673759 | 25.89367001 |
| O  | 9.71321040  | 18.72444909 | 27.92378541 |
| Zn | 11.35306937 | 17.76810513 | 28.56160813 |
| O  | 11.35900554 | 17.77479400 | 30.59151235 |
| Zn | 12.99707813 | 18.72843405 | 25.89649779 |
| O  | 12.99708283 | 18.71995603 | 27.92397322 |
| Zn | 14.64109741 | 17.76810538 | 28.56160545 |
| O  | 14.63516988 | 17.77479465 | 30.59151042 |
| Zn | 16.28288988 | 18.71674010 | 25.89366281 |
| O  | 16.28095429 | 18.72445102 | 27.92377772 |
| Zn | 17.93456221 | 17.80887587 | 28.56448557 |
| O  | 17.92315874 | 17.76878650 | 30.59501803 |
| Zn | 19.54807554 | 18.73013549 | 25.90396942 |
| O  | 19.60964860 | 18.69445773 | 27.93141666 |
| Zn | 21.35666564 | 17.68586536 | 28.57010997 |
| O  | 21.24790000 | 17.74887349 | 30.59553074 |

|    |             |             |             |
|----|-------------|-------------|-------------|
| Zn | 22.59893991 | 18.94452823 | 26.06760619 |
| O  | 22.87837957 | 18.72199478 | 27.91991629 |
| Zn | 3.41181110  | 20.40813241 | 28.72670090 |
| O  | 3.17272756  | 20.64004537 | 30.58545677 |
| Zn | 4.75491937  | 21.59637521 | 25.90748305 |
| O  | 4.80081026  | 21.55424560 | 27.92697081 |
| Zn | 6.45548805  | 20.58767704 | 28.56500209 |
| O  | 6.42602157  | 20.61857870 | 30.59540991 |
| Zn | 8.06709579  | 21.56516359 | 25.89390983 |
| O  | 8.07496530  | 21.56236164 | 27.92402125 |
| Zn | 9.72053555  | 20.62038725 | 28.56556665 |
| O  | 9.71361918  | 20.61712553 | 30.59275272 |
| Zn | 11.35456120 | 21.56455231 | 25.89390207 |
| O  | 11.35797346 | 21.56608041 | 27.92156303 |
| Zn | 12.99708217 | 20.61533802 | 28.56333726 |
| O  | 12.99708719 | 20.62019705 | 30.59052440 |
| Zn | 14.63959387 | 21.56455245 | 25.89389859 |
| O  | 14.63619071 | 21.56608028 | 27.92155903 |
| Zn | 16.27362994 | 20.62038862 | 28.56556141 |
| O  | 16.28055508 | 20.61712729 | 30.59274853 |
| Zn | 17.92705727 | 21.56516424 | 25.89389876 |
| O  | 17.91919826 | 21.56236208 | 27.92401056 |
| Zn | 19.53867734 | 20.58767791 | 28.56499055 |
| O  | 19.56815165 | 20.61858092 | 30.59539981 |
| Zn | 21.23923271 | 21.59637401 | 25.90746122 |
| O  | 21.19335285 | 21.55424461 | 27.92695085 |
| Zn | 22.58235249 | 20.40813174 | 28.72668354 |
| O  | 22.82144173 | 20.64004520 | 30.58543815 |
| Zn | 3.41142409  | 24.61808068 | 26.05968422 |
| O  | 3.17232742  | 24.38614139 | 27.91835975 |
| Zn | 4.75530972  | 23.42971283 | 28.57402658 |
| O  | 4.80119576  | 23.47169556 | 30.59350203 |
| Zn | 6.45498637  | 24.43819550 | 25.89712786 |
| O  | 6.42551345  | 24.40742774 | 27.92750128 |
| Zn | 8.06725707  | 23.46057601 | 28.56196611 |
| O  | 8.07531576  | 23.46346737 | 30.59188118 |
| Zn | 9.72017517  | 24.40525193 | 25.89652879 |
| O  | 9.71322156  | 24.40885725 | 27.92400538 |
| Zn | 11.35460705 | 23.46084793 | 28.56334944 |
| O  | 11.35812672 | 23.45957612 | 30.59054460 |
| Zn | 12.99707793 | 24.41009242 | 25.89373174 |
| O  | 12.99708236 | 24.40568449 | 27.92140302 |
| Zn | 14.63955816 | 23.46084788 | 28.56334717 |
| O  | 14.63604827 | 23.45957628 | 30.59054268 |
| Zn | 16.27398059 | 24.40525076 | 25.89652213 |
| O  | 16.28094328 | 24.40885559 | 27.92399908 |
| Zn | 17.92690901 | 23.46057544 | 28.56195961 |

|    |             |             |             |
|----|-------------|-------------|-------------|
| O  | 17.91885894 | 23.46346759 | 30.59187530 |
| Zn | 19.53916762 | 24.43819364 | 25.89711355 |
| O  | 19.56865098 | 24.40742551 | 27.92748716 |
| Zn | 21.23885627 | 23.42970989 | 28.57401270 |
| O  | 21.19297798 | 23.47169431 | 30.59349030 |
| Zn | 22.58272876 | 24.61807669 | 26.05966033 |
| O  | 22.82183379 | 24.38613875 | 27.91833470 |
| Zn | 3.39528223  | 26.08139300 | 28.73329024 |
| O  | 3.11628218  | 26.30377005 | 30.58554096 |
| Zn | 4.63715790  | 27.33989784 | 25.90278753 |
| O  | 4.74611444  | 27.27713618 | 27.92795272 |
| Zn | 6.44604476  | 26.29544320 | 28.57047912 |
| O  | 6.38483635  | 26.33123935 | 30.59775430 |
| Zn | 8.05907957  | 27.21682688 | 25.89639990 |
| O  | 8.07067184  | 27.25733960 | 27.92691143 |
| Zn | 9.71113899  | 26.30843900 | 28.56154820 |
| O  | 9.71338702  | 26.30099193 | 30.59149076 |
| Zn | 11.35278442 | 27.25722202 | 25.89319539 |
| O  | 11.35883109 | 27.25113326 | 27.92333444 |
| Zn | 12.99708398 | 26.29653996 | 28.56520517 |
| O  | 12.99708819 | 26.30527583 | 30.59242839 |
| Zn | 14.64137269 | 27.25722087 | 25.89319117 |
| O  | 14.63533557 | 27.25113198 | 27.92333116 |
| Zn | 16.28302754 | 26.30843737 | 28.56154404 |
| O  | 16.28078840 | 26.30099046 | 30.59148650 |
| Zn | 17.93507616 | 27.21682506 | 25.89638929 |
| O  | 17.92349319 | 27.25733695 | 27.92690106 |
| Zn | 19.54812170 | 26.29544056 | 28.57046746 |
| O  | 19.60933676 | 26.33123625 | 30.59774544 |
| Zn | 21.35699542 | 27.33989148 | 25.90276641 |
| O  | 21.24804906 | 27.27713103 | 27.92793422 |
| Zn | 22.59888215 | 26.08138738 | 28.73327343 |
| O  | 22.87788730 | 26.30376390 | 30.58552316 |
| Zn | 5.10603269  | 29.04533167 | 28.73261898 |
| O  | 4.77397045  | 29.17557176 | 30.58489651 |
| Zn | 6.38101839  | 29.76237839 | 26.05865048 |
| O  | 6.46248061  | 30.08578531 | 27.91723581 |
| Zn | 8.08210898  | 29.19267609 | 28.57277446 |
| O  | 8.06897664  | 29.13268870 | 30.59242919 |
| Zn | 9.66942674  | 30.11017551 | 25.90583897 |
| O  | 9.72883412  | 30.09139606 | 27.92546310 |
| Zn | 11.39272536 | 29.14103857 | 28.56384661 |
| O  | 11.35191225 | 29.15199987 | 30.59437503 |
| Zn | 12.99707946 | 30.07827193 | 25.90251071 |
| O  | 12.99708425 | 30.14903480 | 27.93016131 |
| Zn | 14.60144485 | 29.14103806 | 28.56384364 |
| O  | 14.64226671 | 29.15199903 | 30.59437237 |

|    |             |             |             |
|----|-------------|-------------|-------------|
| Zn | 16.32473195 | 30.11017406 | 25.90582900 |
| O  | 16.26533424 | 30.09139449 | 27.92545472 |
| Zn | 17.91205832 | 29.19267368 | 28.57276661 |
| O  | 17.92520044 | 29.13268613 | 30.59242268 |
| Zn | 19.61313877 | 29.76237341 | 26.05863689 |
| O  | 19.53168571 | 30.08577896 | 27.91722241 |
| Zn | 20.88813471 | 29.04532492 | 28.73260672 |
| O  | 21.22020329 | 29.17556418 | 30.58488286 |
| Zn | 10.02693280 | 31.86754357 | 28.72498861 |
| O  | 9.70674875  | 31.95897213 | 30.58375897 |
| Zn | 11.28585885 | 32.61350174 | 26.06547074 |
| O  | 11.33923117 | 32.96657254 | 27.91780967 |
| Zn | 12.99708674 | 32.16636012 | 28.56850417 |
| O  | 12.99709045 | 32.04137818 | 30.59404813 |
| Zn | 14.70830108 | 32.61350023 | 26.06546522 |
| O  | 14.65494029 | 32.96657129 | 27.91780446 |
| Zn | 15.96723979 | 31.86754243 | 28.72498175 |
| O  | 16.28743035 | 31.95896970 | 30.58375110 |
| Zn | 10.02632958 | 13.15796781 | 31.39111811 |
| O  | 9.70616649  | 13.06676978 | 33.24991243 |
| Zn | 11.28566116 | 12.41021293 | 34.06331882 |
| O  | 11.33875991 | 12.05813776 | 35.91588266 |
| Zn | 12.99709192 | 12.85932820 | 31.23490924 |
| O  | 12.99709281 | 12.98418148 | 33.26024015 |
| Zn | 14.70852665 | 12.41021470 | 34.06331902 |
| O  | 14.65542569 | 12.05814055 | 35.91588290 |
| Zn | 15.96785211 | 13.15797084 | 31.39111418 |
| O  | 16.28801759 | 13.06677199 | 33.24990841 |
| Zn | 5.10568543  | 15.98032310 | 31.39967702 |
| O  | 4.77368328  | 15.85048625 | 33.25212465 |
| Zn | 6.38156369  | 15.26227114 | 34.05840132 |
| O  | 6.46237977  | 14.93938696 | 35.91738701 |
| Zn | 8.08218555  | 15.83337997 | 31.24012032 |
| O  | 8.06877318  | 15.89337029 | 33.25989127 |
| Zn | 9.67019002  | 14.91544712 | 33.90603147 |
| O  | 9.72873693  | 14.93418169 | 35.92586288 |
| Zn | 11.39273873 | 15.88466832 | 31.23121971 |
| O  | 11.35192725 | 15.87399104 | 33.26164992 |
| Zn | 12.99709099 | 14.94664201 | 33.90356001 |
| O  | 12.99709049 | 14.87629910 | 35.93119925 |
| Zn | 14.60143949 | 15.88466914 | 31.23121832 |
| O  | 14.64225455 | 15.87399135 | 33.26164895 |
| Zn | 16.32399238 | 14.91544885 | 33.90603197 |
| O  | 16.26544424 | 14.93418410 | 35.92586386 |
| Zn | 17.91199153 | 15.83338531 | 31.24011700 |
| O  | 17.92540740 | 15.89337414 | 33.25988851 |
| Zn | 19.61261740 | 15.26227871 | 34.05840286 |

|    |             |             |             |
|----|-------------|-------------|-------------|
| O  | 19.53179990 | 14.93939590 | 35.91738853 |
| Zn | 20.88848912 | 15.98033025 | 31.39967061 |
| O  | 21.22049367 | 15.85049279 | 33.25211772 |
| Zn | 3.39493072  | 18.94457735 | 31.40019965 |
| O  | 3.11611649  | 18.72243673 | 33.25262703 |
| Zn | 4.63749097  | 17.68611004 | 33.90285538 |
| O  | 4.74550962  | 17.74854868 | 35.92880589 |
| Zn | 6.44593394  | 18.73041163 | 31.23816267 |
| O  | 6.38469415  | 18.69482872 | 33.26566602 |
| Zn | 8.05944973  | 17.80902407 | 33.89929298 |
| O  | 8.07076334  | 17.76886691 | 35.93017693 |
| Zn | 9.71127314  | 18.71747408 | 31.23011056 |
| O  | 9.71336454  | 18.72510471 | 33.26005766 |
| Zn | 11.35309692 | 17.76839349 | 33.89809266 |
| O  | 11.35903494 | 17.77464866 | 35.92820540 |
| Zn | 12.99708883 | 18.72926486 | 31.23411843 |
| O  | 12.99709003 | 18.72087658 | 33.26122745 |
| Zn | 14.64108299 | 17.76839348 | 33.89809229 |
| O  | 14.63514452 | 17.77464925 | 35.92820585 |
| Zn | 16.28290257 | 18.71747651 | 31.23010857 |
| O  | 16.28081457 | 18.72510665 | 33.26005539 |
| Zn | 17.93473021 | 17.80902762 | 33.89929211 |
| O  | 17.92341538 | 17.76887154 | 35.93017755 |
| Zn | 19.54824019 | 18.73041541 | 31.23815675 |
| O  | 19.60948366 | 18.69483204 | 33.26566077 |
| Zn | 21.35669034 | 17.68611354 | 33.90285683 |
| O  | 21.24866978 | 17.74855323 | 35.92880774 |
| Zn | 22.59924007 | 18.94458210 | 31.40019157 |
| O  | 22.87805806 | 18.72244281 | 33.25261830 |
| Zn | 3.41094539  | 20.40885076 | 34.05912962 |
| O  | 3.17188711  | 20.64025637 | 35.91816457 |
| Zn | 4.75562209  | 21.59627102 | 31.24112017 |
| O  | 4.80119958  | 21.55440350 | 33.26077556 |
| Zn | 6.45535596  | 20.58783254 | 33.89991489 |
| O  | 6.42589347  | 20.61847618 | 35.93068589 |
| Zn | 8.06744498  | 21.56534713 | 31.23044726 |
| O  | 8.07540271  | 21.56255874 | 33.26039687 |
| Zn | 9.72055542  | 20.62062411 | 33.90343940 |
| O  | 9.71379549  | 20.61731396 | 35.93081375 |
| Zn | 11.35471739 | 21.56500639 | 31.23301943 |
| O  | 11.35822178 | 21.56647609 | 33.26007837 |
| Zn | 12.99708911 | 20.61565549 | 33.90276432 |
| O  | 12.99708982 | 20.62032794 | 35.93009781 |
| Zn | 14.63945851 | 21.56500664 | 31.23301860 |
| O  | 14.63595706 | 21.56647632 | 33.26007707 |
| Zn | 16.27362377 | 20.62062580 | 33.90343888 |
| O  | 16.28038379 | 20.61731630 | 35.93081434 |

|    |             |             |             |
|----|-------------|-------------|-------------|
| Zn | 17.92672947 | 21.56534811 | 31.23044386 |
| O  | 17.91877596 | 21.56255991 | 33.26039429 |
| Zn | 19.53882308 | 20.58783440 | 33.89991441 |
| O  | 19.56828486 | 20.61848003 | 35.93068725 |
| Zn | 21.23855165 | 21.59627144 | 31.24111303 |
| O  | 21.19297949 | 21.55440396 | 33.26077066 |
| Zn | 22.58323051 | 20.40885139 | 34.05913286 |
| O  | 22.82228700 | 20.64025734 | 35.91816761 |
| Zn | 3.41165371  | 24.61760500 | 31.39252771 |
| O  | 3.17265068  | 24.38596158 | 33.25131517 |
| Zn | 4.75550332  | 23.43009942 | 33.90744787 |
| O  | 4.80074236  | 23.47184927 | 35.92721788 |
| Zn | 6.45560159  | 24.43824123 | 31.23213130 |
| O  | 6.42620951  | 24.40752770 | 33.26252278 |
| Zn | 8.06734830  | 23.46080300 | 33.89868807 |
| O  | 8.07514963  | 23.46369402 | 35.92882178 |
| Zn | 9.72061491  | 24.40540346 | 31.23435313 |
| O  | 9.71382316  | 24.40878995 | 33.26147166 |
| Zn | 11.35469831 | 23.46103260 | 33.90289011 |
| O  | 11.35817245 | 23.45963683 | 35.93023210 |
| Zn | 12.99708830 | 24.41032290 | 31.23295246 |
| O  | 12.99708981 | 24.40567572 | 33.26002415 |
| Zn | 14.63948092 | 23.46103291 | 33.90289063 |
| O  | 14.63600827 | 23.45963747 | 35.93023287 |
| Zn | 16.27356173 | 24.40540238 | 31.23435142 |
| O  | 16.28035655 | 24.40878900 | 33.26147050 |
| Zn | 17.92683150 | 23.46080339 | 33.89868938 |
| O  | 17.91903052 | 23.46369581 | 35.92882381 |
| Zn | 19.53857401 | 24.43823962 | 31.23212710 |
| O  | 19.56797032 | 24.40752639 | 33.26251953 |
| Zn | 21.23867622 | 23.43009815 | 33.90744959 |
| O  | 21.19343759 | 23.47185051 | 35.92722184 |
| Zn | 22.58252004 | 24.61760324 | 31.39252109 |
| O  | 22.82152555 | 24.38596122 | 33.25130815 |
| Zn | 3.39402351  | 26.08199317 | 34.06505662 |
| O  | 3.11523145  | 26.30401544 | 35.91755011 |
| Zn | 4.63775283  | 27.33999067 | 31.23599271 |
| O  | 4.74624623  | 27.27739063 | 33.26135821 |
| Zn | 6.44575023  | 26.29587868 | 33.90470638 |
| O  | 6.38442116  | 26.33157730 | 35.93224742 |
| Zn | 8.05970419  | 27.21690291 | 31.23153506 |
| O  | 8.07119043  | 27.25713982 | 33.26206914 |
| Zn | 9.71120145  | 26.30861713 | 33.89839751 |
| O  | 9.71318025  | 26.30115648 | 35.92855642 |
| Zn | 11.35313487 | 27.25744111 | 31.22996557 |
| O  | 11.35911627 | 27.25107704 | 33.25994668 |
| Zn | 12.99709091 | 26.29676006 | 33.90331469 |

|    |             |             |             |
|----|-------------|-------------|-------------|
| O  | 12.99709089 | 26.30514903 | 35.93072769 |
| Zn | 14.64104294 | 27.25744026 | 31.22996386 |
| O  | 14.63506517 | 27.25107639 | 33.25994614 |
| Zn | 16.28297867 | 26.30861606 | 33.89839882 |
| O  | 16.28100038 | 26.30115627 | 35.92855764 |
| Zn | 17.93447199 | 27.21690100 | 31.23153188 |
| O  | 17.92298938 | 27.25713777 | 33.26206656 |
| Zn | 19.54842971 | 26.29587703 | 33.90470578 |
| O  | 19.60975706 | 26.33157624 | 35.93225039 |
| Zn | 21.35642007 | 27.33998409 | 31.23598442 |
| O  | 21.24793277 | 27.27738640 | 33.26135327 |
| Zn | 22.60015311 | 26.08198865 | 34.06505942 |
| O  | 22.87894234 | 26.30401176 | 35.91755295 |
| Zn | 5.10514499  | 29.04654573 | 34.06457043 |
| O  | 4.77335291  | 29.17653472 | 35.91707765 |
| Zn | 6.38191167  | 29.76304830 | 31.39177846 |
| O  | 6.46308534  | 30.08608135 | 33.25050115 |
| Zn | 8.08211176  | 29.19270794 | 33.90650416 |
| O  | 8.06869835  | 29.13315435 | 35.92644854 |
| Zn | 9.67022463  | 30.11024025 | 31.23987149 |
| O  | 9.72915175  | 30.09141833 | 33.25966740 |
| Zn | 11.39274433 | 29.14144259 | 33.89915570 |
| O  | 11.35202974 | 29.15228394 | 35.93005186 |
| Zn | 12.99709013 | 30.07885596 | 31.23716942 |
| O  | 12.99709163 | 30.14909964 | 33.26489378 |
| Zn | 14.60143941 | 29.14144244 | 33.89915595 |
| O  | 14.64215429 | 29.15228390 | 35.93005253 |
| Zn | 16.32395562 | 30.11023900 | 31.23986734 |
| O  | 16.26503154 | 30.09141804 | 33.25966507 |
| Zn | 17.91206936 | 29.19270619 | 33.90650472 |
| O  | 17.92548334 | 29.13315396 | 35.92645084 |
| Zn | 19.61226672 | 29.76304257 | 31.39177440 |
| O  | 19.53109600 | 30.08607427 | 33.25049714 |
| Zn | 20.88903484 | 29.04653876 | 34.06457239 |
| O  | 21.22082479 | 29.17652894 | 35.91707982 |
| Zn | 10.02613165 | 31.86829145 | 34.05802683 |
| O  | 9.70628112  | 31.95971882 | 35.91706157 |
| Zn | 11.28602313 | 32.61429035 | 31.39869853 |
| O  | 11.33927986 | 32.96645961 | 33.25118604 |
| Zn | 12.99709348 | 32.16659319 | 33.90197336 |
| O  | 12.99709260 | 32.04231989 | 35.92804220 |
| Zn | 14.70815950 | 32.61428841 | 31.39869674 |
| O  | 14.65490677 | 32.96645804 | 33.25118418 |
| Zn | 15.96805364 | 31.86829014 | 34.05802783 |
| O  | 16.28790214 | 31.95971793 | 35.91706312 |
| Zn | 10.02476966 | 13.15614979 | 36.72151842 |
| O  | 9.70514032  | 13.06386376 | 38.58082644 |



|    |             |             |             |
|----|-------------|-------------|-------------|
| Zn | 11.28539352 | 12.40386095 | 39.39005347 |
| O  | 11.33842183 | 12.05045252 | 41.24298412 |
| Zn | 12.99709214 | 12.85815817 | 36.56477304 |
| O  | 12.99708805 | 12.98104673 | 38.59067007 |
| Zn | 14.70878243 | 12.40386209 | 39.39005726 |
| O  | 14.65574674 | 12.05045437 | 41.24298785 |
| Zn | 15.96941217 | 13.15615360 | 36.72152253 |
| O  | 16.28903500 | 13.06386564 | 38.58083188 |
| Zn | 5.10372596  | 15.97866306 | 36.73049405 |
| O  | 4.77246973  | 15.84866651 | 38.58356194 |
| Zn | 6.38076080  | 15.25792391 | 39.38716032 |
| O  | 6.45974708  | 14.93403019 | 41.24711880 |
| Zn | 8.08164323  | 15.83277604 | 36.57240060 |
| O  | 8.06840838  | 15.89130928 | 38.59282582 |
| Zn | 9.66989996  | 14.91212732 | 39.23705557 |
| O  | 9.72657182  | 14.92852208 | 41.25835899 |
| Zn | 11.39250897 | 15.88365787 | 36.56536736 |
| O  | 11.35181209 | 15.87203148 | 38.59659068 |
| Zn | 12.99708642 | 14.94246453 | 39.23508777 |
| O  | 12.99708288 | 14.86994139 | 41.26414581 |
| Zn | 14.60167070 | 15.88365890 | 36.56536875 |
| O  | 14.64236180 | 15.87203223 | 38.59659250 |
| Zn | 16.32427289 | 14.91213003 | 39.23706199 |
| O  | 16.26759343 | 14.92852524 | 41.25836501 |
| Zn | 17.91253575 | 15.83278194 | 36.57240531 |
| O  | 17.92576426 | 15.89131350 | 38.59283082 |
| Zn | 19.61341029 | 15.25793148 | 39.38717275 |
| O  | 19.53441661 | 14.93403846 | 41.24713093 |
| Zn | 20.89044960 | 15.97867159 | 36.73050332 |
| O  | 21.22169992 | 15.84867394 | 38.58357215 |
| Zn | 3.39245686  | 18.94385179 | 36.73117639 |
| O  | 3.11401853  | 18.72220952 | 38.58421940 |
| Zn | 4.63551456  | 17.68485850 | 39.23150517 |
| O  | 4.74032285  | 17.74522220 | 41.25913082 |
| Zn | 6.44489236  | 18.72988618 | 36.57202987 |
| O  | 6.38361151  | 18.69410902 | 38.60063731 |
| Zn | 8.05851996  | 17.80661951 | 39.23213519 |
| O  | 8.06858096  | 17.76464362 | 41.26498050 |
| Zn | 9.71105716  | 18.71711069 | 36.56642797 |
| O  | 9.71298143  | 18.72403171 | 38.59727868 |
| Zn | 11.35268530 | 17.76612136 | 39.23391915 |
| O  | 11.35789968 | 17.77020975 | 41.26626968 |
| Zn | 12.99709015 | 18.72872540 | 36.57192842 |
| O  | 12.99708676 | 18.71976992 | 38.60001516 |
| Zn | 14.64148726 | 17.76612197 | 39.23392126 |
| O  | 14.63626654 | 17.77021125 | 41.26627233 |
| Zn | 16.28312083 | 18.71711379 | 36.56643048 |

|    |             |             |             |
|----|-------------|-------------|-------------|
| O  | 16.28119096 | 18.72403461 | 38.59728077 |
| Zn | 17.93565144 | 17.80662361 | 39.23214131 |
| O  | 17.92558339 | 17.76464891 | 41.26498727 |
| Zn | 19.54928365 | 18.72989155 | 36.57203519 |
| O  | 19.61055979 | 18.69411395 | 38.60064344 |
| Zn | 21.35865716 | 17.68486380 | 39.23152170 |
| O  | 21.25384128 | 17.74522763 | 41.25914724 |
| Zn | 22.60171503 | 18.94385773 | 36.73118898 |
| O  | 22.88014965 | 18.72221699 | 38.58423240 |
| Zn | 3.40694452  | 20.41015186 | 39.38821513 |
| O  | 3.16623347  | 20.64015944 | 41.24828497 |
| Zn | 4.75479780  | 21.59623119 | 36.57369093 |
| O  | 4.79934190  | 21.55497448 | 38.59401182 |
| Zn | 6.45295112  | 20.58802355 | 39.23292795 |
| O  | 6.42143729  | 20.61820636 | 41.26566946 |
| Zn | 8.06698093  | 21.56543058 | 36.56690687 |
| O  | 8.07439219  | 21.56259308 | 38.59776822 |
| Zn | 9.71892673  | 20.61952354 | 39.24075608 |
| O  | 9.71040315  | 20.61502465 | 41.27073758 |
| Zn | 11.35458673 | 21.56498642 | 36.57296032 |
| O  | 11.35788560 | 21.56615939 | 38.60130721 |
| Zn | 12.99708636 | 20.61429590 | 39.24227583 |
| O  | 12.99708378 | 20.61743268 | 41.27289807 |
| Zn | 14.63959288 | 21.56498721 | 36.57296212 |
| O  | 14.63628813 | 21.56616023 | 38.60130848 |
| Zn | 16.27524607 | 20.61952593 | 39.24076125 |
| O  | 16.28376363 | 20.61502748 | 41.27074352 |
| Zn | 17.92719646 | 21.56543322 | 36.56691109 |
| O  | 17.91978038 | 21.56259617 | 38.59777301 |
| Zn | 19.54122006 | 20.58802776 | 39.23293786 |
| O  | 19.57272672 | 20.61821179 | 41.26568028 |
| Zn | 21.23937884 | 21.59623388 | 36.57369936 |
| O  | 21.19483116 | 21.55497799 | 38.59402206 |
| Zn | 22.58722268 | 20.41015522 | 39.38823640 |
| O  | 22.82792649 | 20.64016288 | 41.24830687 |
| Zn | 3.40933363  | 24.61726821 | 36.72353745 |
| O  | 3.16981319  | 24.38640660 | 38.58282922 |
| Zn | 4.75265784  | 23.43129298 | 39.23897679 |
| O  | 4.79508257  | 23.47228727 | 41.26023738 |
| Zn | 6.45460375  | 24.43862784 | 36.56670585 |
| O  | 6.42459389  | 24.40823192 | 38.59790911 |
| Zn | 8.06533334  | 23.46134930 | 39.23484128 |
| O  | 8.07104839  | 23.46443323 | 41.26722391 |
| Zn | 9.72011605  | 24.40574800 | 36.57243701 |
| O  | 9.71298124  | 24.40914947 | 38.60054384 |
| Zn | 11.35366707 | 23.46146923 | 39.24255925 |
| O  | 11.35594607 | 23.46060590 | 41.27319376 |

|    |             |             |             |
|----|-------------|-------------|-------------|
| Zn | 12.99709044 | 24.41052330 | 36.57302612 |
| O  | 12.99708743 | 24.40592973 | 38.60138411 |
| Zn | 14.64050663 | 23.46146995 | 39.24256297 |
| O  | 14.63822197 | 23.46060688 | 41.27319782 |
| Zn | 16.27406449 | 24.40574821 | 36.57244109 |
| O  | 16.28119349 | 24.40915019 | 38.60054861 |
| Zn | 17.92884011 | 23.46135128 | 39.23485149 |
| O  | 17.92311799 | 23.46443615 | 41.26723458 |
| Zn | 19.53957529 | 24.43862809 | 36.56671339 |
| O  | 19.56958026 | 24.40823315 | 38.59791748 |
| Zn | 21.24151439 | 23.43129504 | 39.23899371 |
| O  | 21.19908289 | 23.47229164 | 41.26025587 |
| Zn | 22.58484197 | 24.61726977 | 36.72355189 |
| O  | 22.82435775 | 24.38641050 | 38.58284410 |
| Zn | 3.38865217  | 26.08468728 | 39.39265761 |
| O  | 3.10879536  | 26.30699070 | 41.24557682 |
| Zn | 4.63675525  | 27.34064438 | 36.56663799 |
| O  | 4.74367797  | 27.27878191 | 38.59258830 |
| Zn | 6.44232249  | 26.29770420 | 39.23690947 |
| O  | 6.37924677  | 26.33420508 | 41.26589504 |
| Zn | 8.05892275  | 27.21766807 | 36.56625247 |
| O  | 8.06967118  | 27.25801133 | 38.59760417 |
| Zn | 9.70958814  | 26.30984705 | 39.23469153 |
| O  | 9.71019829  | 26.30385300 | 41.26709074 |
| Zn | 11.35288452 | 27.25786442 | 36.56668262 |
| O  | 11.35848033 | 27.25172564 | 38.59756976 |
| Zn | 12.99708771 | 26.29846709 | 39.24092446 |
| O  | 12.99708399 | 26.30874346 | 41.27093391 |
| Zn | 14.64129695 | 27.25786417 | 36.56668399 |
| O  | 14.63569557 | 27.25172566 | 38.59757223 |
| Zn | 16.28458574 | 26.30984750 | 39.23469930 |
| O  | 16.28396852 | 26.30385406 | 41.26709842 |
| Zn | 17.93525671 | 27.21766818 | 36.56625822 |
| O  | 17.92450283 | 27.25801184 | 38.59761036 |
| Zn | 19.55184970 | 26.29770492 | 39.23692153 |
| O  | 19.61491694 | 26.33420689 | 41.26591026 |
| Zn | 21.35741927 | 27.34063958 | 36.56664635 |
| O  | 21.25049467 | 27.27878118 | 38.59260020 |
| Zn | 22.60551575 | 26.08468694 | 39.39268144 |
| O  | 22.88536415 | 26.30699135 | 41.24560118 |
| Zn | 5.10001975  | 29.04963485 | 39.39240010 |
| O  | 4.76722018  | 29.18006300 | 41.24530369 |
| Zn | 6.38110739  | 29.76530746 | 36.72313998 |
| O  | 6.46119825  | 30.08818045 | 38.58240490 |
| Zn | 8.07953925  | 29.19432312 | 39.23837801 |
| O  | 8.06514148  | 29.13730578 | 41.25979184 |
| Zn | 9.66992165  | 30.11103858 | 36.57288424 |

|    |             |             |             |
|----|-------------|-------------|-------------|
| O  | 9.72763295  | 30.09253208 | 38.59334061 |
| Zn | 11.39124772 | 29.14315659 | 39.23258049 |
| O  | 11.34972814 | 29.15574770 | 41.26543489 |
| Zn | 12.99709160 | 30.08006723 | 36.57160608 |
| O  | 12.99708842 | 30.15018530 | 38.60045037 |
| Zn | 14.60292804 | 29.14315670 | 39.23258416 |
| O  | 14.64443993 | 29.15574815 | 41.26543901 |
| Zn | 16.32426197 | 30.11103827 | 36.57288772 |
| O  | 16.26654360 | 30.09253336 | 38.59334577 |
| Zn | 17.91463462 | 29.19432382 | 39.23838777 |
| O  | 17.92902475 | 29.13730810 | 41.25980357 |
| Zn | 19.61307401 | 29.76530351 | 36.72314875 |
| O  | 19.53297672 | 30.08817609 | 38.58241294 |
| Zn | 20.89415055 | 29.04963075 | 39.39241917 |
| O  | 21.22694147 | 29.18006134 | 41.24532359 |
| Zn | 10.02291319 | 31.87081276 | 39.38774987 |
| O  | 9.70323563  | 31.96410350 | 41.24779045 |
| Zn | 11.28550508 | 32.61681301 | 36.73045276 |
| O  | 11.33837053 | 32.96818174 | 38.58359844 |
| Zn | 12.99708867 | 32.16863751 | 39.23146448 |
| O  | 12.99708326 | 32.04794631 | 41.25917667 |
| Zn | 14.70867923 | 32.61681135 | 36.73045601 |
| O  | 14.65580777 | 32.96818085 | 38.58360113 |
| Zn | 15.97126153 | 31.87081190 | 39.38775881 |
| O  | 16.29092924 | 31.96410437 | 41.24780113 |
| Zn | 10.02131226 | 13.14653643 | 42.04531837 |
| O  | 9.70202112  | 13.04945067 | 43.90574589 |
| Zn | 11.28304447 | 12.38602530 | 44.71054192 |
| O  | 11.33557326 | 12.02977169 | 46.56461179 |
| Zn | 12.99708307 | 12.84981142 | 41.89072678 |
| O  | 12.99707777 | 12.96717932 | 43.91884175 |
| Zn | 14.71111012 | 12.38602600 | 44.71054675 |
| O  | 14.65857334 | 12.02977319 | 46.56461662 |
| Zn | 15.97285141 | 13.14654097 | 42.04532569 |
| O  | 16.29213402 | 13.04945297 | 43.90575463 |
| Zn | 5.09694014  | 15.97217527 | 42.05378901 |
| O  | 4.76591376  | 15.84155170 | 43.90862953 |
| Zn | 6.37312538  | 15.24306396 | 44.70840668 |
| O  | 6.44372432  | 14.92032589 | 46.57292840 |
| Zn | 8.07865534  | 15.82712494 | 41.90210038 |
| O  | 8.06438295  | 15.88097506 | 43.92637067 |
| Zn | 9.66803601  | 14.89663234 | 44.56033881 |
| O  | 9.72140600  | 14.90437644 | 46.58609993 |
| Zn | 11.39157151 | 15.87639576 | 41.89587457 |
| O  | 11.35059945 | 15.85993402 | 43.93029773 |
| Zn | 12.99707592 | 14.92712424 | 44.56165501 |
| O  | 12.99707182 | 14.84901971 | 46.59553532 |

|    |             |             |             |
|----|-------------|-------------|-------------|
| Zn | 14.60259118 | 15.87639803 | 41.89587809 |
| O  | 14.64355304 | 15.85993576 | 43.93030129 |
| Zn | 16.32611374 | 14.89663441 | 44.56034936 |
| O  | 16.27273335 | 14.90437928 | 46.58610917 |
| Zn | 17.91550650 | 15.82713187 | 41.90211129 |
| O  | 17.92976600 | 15.88098148 | 43.92638130 |
| Zn | 19.62101993 | 15.24306918 | 44.70842223 |
| O  | 19.55040896 | 14.92033058 | 46.57294320 |
| Zn | 20.89721888 | 15.97218301 | 42.05380922 |
| O  | 21.22823395 | 15.84156032 | 43.90865201 |
| Zn | 3.38376120  | 18.94061917 | 42.05464470 |
| O  | 3.10500811  | 18.71925637 | 43.90945455 |
| Zn | 4.63104584  | 17.68171061 | 44.54397002 |
| O  | 4.73054918  | 17.73878816 | 46.57483370 |
| Zn | 6.44047869  | 18.72696491 | 41.89736895 |
| O  | 6.37812367  | 18.69038304 | 43.92842895 |
| Zn | 8.04943731  | 17.79839882 | 44.55817825 |
| O  | 8.05121731  | 17.75343240 | 46.59783445 |
| Zn | 9.70894714  | 18.71283899 | 41.90086560 |
| O  | 9.70909355  | 18.71646679 | 43.93677365 |
| Zn | 11.34850006 | 17.75274783 | 44.56519229 |
| O  | 11.34935733 | 17.74739114 | 46.60783201 |
| Zn | 12.99708286 | 18.72269813 | 41.90825341 |
| O  | 12.99707833 | 18.70851375 | 43.94216392 |
| Zn | 14.64565493 | 17.75274859 | 44.56519852 |
| O  | 14.64479250 | 17.74739180 | 46.60783907 |
| Zn | 16.28521605 | 18.71284281 | 41.90087405 |
| O  | 16.28506039 | 18.71647124 | 43.93678148 |
| Zn | 17.94471432 | 17.79840476 | 44.55819388 |
| O  | 17.94292697 | 17.75343991 | 46.59784942 |
| Zn | 19.55368094 | 18.72697182 | 41.89738266 |
| O  | 19.61602719 | 18.69039022 | 43.92844286 |
| Zn | 21.36309945 | 17.68172053 | 44.54399201 |
| O  | 21.26359208 | 17.73879587 | 46.57485505 |
| Zn | 22.61039556 | 18.94062567 | 42.05467157 |
| O  | 22.88914025 | 18.71926665 | 43.90948319 |
| Zn | 3.39078078  | 20.41003334 | 44.70980474 |
| O  | 3.14700802  | 20.63184239 | 46.57450504 |
| Zn | 4.74875127  | 21.59590491 | 41.90378743 |
| O  | 4.78888208  | 21.55577987 | 43.92796176 |
| Zn | 6.44184572  | 20.58335095 | 44.55918271 |
| O  | 6.40378383  | 20.60758452 | 46.59873408 |
| Zn | 8.06255561  | 21.56518271 | 41.90152228 |
| O  | 8.06640042  | 21.56216248 | 43.93744675 |
| Zn | 9.71020319  | 20.61386950 | 44.57139090 |
| O  | 9.69470812  | 20.60516141 | 46.61279378 |
| Zn | 11.35212112 | 21.56320988 | 41.90835018 |

|    |             |             |             |
|----|-------------|-------------|-------------|
| O  | 11.35321477 | 21.56293360 | 43.94276882 |
| Zn | 12.99707735 | 20.60784588 | 44.56539824 |
| O  | 12.99707528 | 20.60653950 | 46.60617685 |
| Zn | 14.64204525 | 21.56321078 | 41.90835562 |
| O  | 14.64094189 | 21.56293499 | 43.94277382 |
| Zn | 16.28395089 | 20.61387219 | 44.57140459 |
| O  | 16.29943974 | 20.60516411 | 46.61280853 |
| Zn | 17.93160679 | 21.56518668 | 41.90153589 |
| O  | 17.92775291 | 21.56216714 | 43.93746065 |
| Zn | 19.55230438 | 20.58335587 | 44.55920427 |
| O  | 19.59035764 | 20.60759050 | 46.59875600 |
| Zn | 21.24540824 | 21.59590997 | 41.90380790 |
| O  | 21.20526826 | 21.55578817 | 43.92798366 |
| Zn | 22.60336675 | 20.41004407 | 44.70983301 |
| O  | 22.84712983 | 20.63185705 | 46.57453405 |
| Zn | 3.39964950  | 24.61843990 | 42.04813916 |
| O  | 3.15632698  | 24.39005326 | 43.90854924 |
| Zn | 4.73887471  | 23.43646900 | 44.56290222 |
| O  | 4.77237847  | 23.47863351 | 46.58864070 |
| Zn | 6.44820448  | 24.44085904 | 41.89780178 |
| O  | 6.41403456  | 24.41236259 | 43.93222369 |
| Zn | 8.05225313  | 23.46349273 | 44.56649728 |
| O  | 8.04784094  | 23.46728227 | 46.60918148 |
| Zn | 9.71522228  | 24.40822375 | 41.90912155 |
| O  | 9.70373623  | 24.41397897 | 43.94306596 |
| Zn | 11.34861034 | 23.46383352 | 44.56588582 |
| O  | 11.34722635 | 23.46497407 | 46.60668612 |
| Zn | 12.99708334 | 24.41302782 | 41.90859492 |
| O  | 12.99707862 | 24.41081613 | 43.94302722 |
| Zn | 14.64554384 | 23.46383424 | 44.56589418 |
| O  | 14.64692204 | 23.46497455 | 46.60669545 |
| Zn | 16.27894373 | 24.40822521 | 41.90913255 |
| O  | 16.29041971 | 24.41398036 | 43.94307790 |
| Zn | 17.94190029 | 23.46349507 | 44.56651839 |
| O  | 17.94630518 | 23.46728479 | 46.60920357 |
| Zn | 19.54595846 | 24.44086219 | 41.89782145 |
| O  | 19.58011811 | 24.41236753 | 43.93224332 |
| Zn | 21.25527549 | 23.43647531 | 44.56293252 |
| O  | 21.22176268 | 23.47864396 | 46.58867102 |
| Zn | 22.59450920 | 24.61844429 | 42.04817148 |
| O  | 22.83782392 | 24.39006036 | 43.90858213 |
| Zn | 3.37268743  | 26.09059210 | 44.71418480 |
| O  | 3.09028736  | 26.31358965 | 46.56830674 |
| Zn | 4.62993263  | 27.34416397 | 41.89359228 |
| O  | 4.73221730  | 27.28480865 | 43.92176495 |
| Zn | 6.42963011  | 26.30442437 | 44.56434887 |
| O  | 6.36193829  | 26.34344485 | 46.59817169 |

|    |             |             |             |
|----|-------------|-------------|-------------|
| Zn | 8.05345454  | 27.22150362 | 41.89749594 |
| O  | 8.06030575  | 27.26422147 | 43.93206950 |
| Zn | 9.70069290  | 26.31928886 | 44.56657339 |
| O  | 9.69550393  | 26.32162375 | 46.60927233 |
| Zn | 11.35056811 | 27.26125358 | 41.90162761 |
| O  | 11.35437296 | 27.25806011 | 43.93756159 |
| Zn | 12.99707714 | 26.30801898 | 44.57197037 |
| O  | 12.99707273 | 26.32634224 | 46.61340218 |
| Zn | 14.64359762 | 27.26125371 | 41.90163245 |
| O  | 14.63978322 | 27.25806067 | 43.93756740 |
| Zn | 16.29345977 | 26.31928972 | 44.56658801 |
| O  | 16.29864019 | 26.32162474 | 46.60928695 |
| Zn | 17.94070951 | 27.22150658 | 41.89751161 |
| O  | 17.93384745 | 27.26422441 | 43.93208522 |
| Zn | 19.56451935 | 26.30442745 | 44.56437486 |
| O  | 19.63220188 | 26.34344969 | 46.59819987 |
| Zn | 21.36422581 | 27.34416333 | 41.89361812 |
| O  | 21.26193464 | 27.28481203 | 43.92179248 |
| Zn | 22.62145880 | 26.09059636 | 44.71422440 |
| O  | 22.90385053 | 26.31359463 | 46.56834692 |
| Zn | 5.08636934  | 29.05955304 | 44.71416744 |
| O  | 4.75144864  | 29.19155104 | 46.56823044 |
| Zn | 6.37487012  | 29.77244584 | 42.04811357 |
| O  | 6.45075195  | 30.09717537 | 43.90851764 |
| Zn | 8.06757772  | 29.20272209 | 44.56267309 |
| O  | 8.04740159  | 29.15265637 | 46.58853172 |
| Zn | 9.66684513  | 30.11581182 | 41.90341460 |
| O  | 9.72113929  | 30.10026492 | 43.92771081 |
| Zn | 11.38920807 | 29.15425576 | 44.55929631 |
| O  | 11.34943363 | 29.17542045 | 46.59890576 |
| Zn | 12.99708268 | 30.08472215 | 41.89749868 |
| O  | 12.99707721 | 30.15595177 | 43.92878258 |
| Zn | 14.60494432 | 29.15425646 | 44.55930222 |
| O  | 14.64470927 | 29.17542140 | 46.59891277 |
| Zn | 16.32732024 | 30.11581246 | 41.90342445 |
| O  | 16.27301443 | 30.10026832 | 43.92772243 |
| Zn | 17.92657212 | 29.20272526 | 44.56269179 |
| O  | 17.94673873 | 29.15266179 | 46.58855180 |
| Zn | 19.61929318 | 29.77244578 | 42.04813638 |
| O  | 19.54340082 | 30.09717457 | 43.90853959 |
| Zn | 20.90777822 | 29.05955221 | 44.71420133 |
| O  | 21.24268880 | 29.19155447 | 46.56826523 |
| Zn | 10.01434408 | 31.88387198 | 44.70987485 |
| O  | 9.69995511  | 31.98370802 | 46.57450670 |
| Zn | 11.28359558 | 32.62532405 | 42.05469898 |
| O  | 11.33590555 | 32.97659547 | 43.90964872 |
| Zn | 12.99707550 | 32.17308372 | 44.54458034 |

|    |             |             |             |
|----|-------------|-------------|-------------|
| O  | 12.99706886 | 32.05865063 | 46.57545055 |
| Zn | 14.71056722 | 32.62532366 | 42.05470609 |
| O  | 14.65824717 | 32.97659675 | 43.90965509 |
| Zn | 15.97980466 | 31.88387362 | 44.70988841 |
| O  | 16.29418111 | 31.98371199 | 46.57452263 |
| Zn | 10.01483511 | 13.11935820 | 47.36912915 |
| O  | 9.70034580  | 13.00898494 | 49.23281205 |
| Zn | 11.28625136 | 12.34036613 | 50.02651654 |
| O  | 11.33866954 | 11.96713683 | 51.87924166 |
| Zn | 12.99707196 | 12.82315153 | 47.20753012 |
| O  | 12.99706626 | 12.92692151 | 49.24034627 |
| Zn | 14.70787883 | 12.34036939 | 50.02652911 |
| O  | 14.65544537 | 11.96713920 | 51.87925326 |
| Zn | 15.97930380 | 13.11936243 | 47.36914161 |
| O  | 16.29378346 | 13.00898820 | 49.23282589 |
| Zn | 5.06851124  | 15.96277116 | 47.35567565 |
| O  | 4.73266915  | 15.83002956 | 49.21407288 |
| Zn | 6.35605633  | 15.20102962 | 49.95454611 |
| O  | 6.39524285  | 14.83748369 | 51.81283711 |
| Zn | 8.07204536  | 15.80955558 | 47.20830859 |
| O  | 8.06217316  | 15.85055404 | 49.23753887 |
| Zn | 9.64715358  | 14.84994572 | 49.89110156 |
| O  | 9.67152286  | 14.83643397 | 51.93504405 |
| Zn | 11.38752806 | 15.84447423 | 47.22409009 |
| O  | 11.34582895 | 15.80756441 | 49.27217462 |
| Zn | 12.99706374 | 14.87205219 | 49.89986686 |
| O  | 12.99705813 | 14.77815963 | 51.95746699 |
| Zn | 14.60661140 | 15.84447670 | 47.22410063 |
| O  | 14.64830107 | 15.80756721 | 49.27218519 |
| Zn | 16.34697551 | 14.84994747 | 49.89112192 |
| O  | 16.32259066 | 14.83642957 | 51.93506210 |
| Zn | 17.92208884 | 15.80956447 | 47.20832211 |
| O  | 17.93194588 | 15.85056550 | 49.23754990 |
| Zn | 19.63806274 | 15.20102452 | 49.95454502 |
| O  | 19.59884533 | 14.83745596 | 51.81282906 |
| Zn | 20.92562421 | 15.96277636 | 47.35568672 |
| O  | 21.26145404 | 15.83002953 | 49.21408507 |
| Zn | 3.36194994  | 18.91926107 | 47.35668881 |
| O  | 3.07924119  | 18.69465312 | 49.21509011 |
| Zn | 4.59373037  | 17.65908259 | 49.87522079 |
| O  | 4.65288622  | 17.69280770 | 51.93641662 |
| Zn | 6.42302177  | 18.71604499 | 47.23000586 |
| O  | 6.35128932  | 18.67376568 | 49.27751195 |
| Zn | 8.01834667  | 17.75606800 | 49.88195727 |
| O  | 8.00210738  | 17.67370280 | 51.94687057 |
| Zn | 9.69556378  | 18.69378997 | 47.22109135 |
| O  | 9.68753629  | 18.68403488 | 49.27512440 |



|    |             |             |             |
|----|-------------|-------------|-------------|
| Zn | 11.34162505 | 17.70926399 | 49.84848111 |
| O  | 11.34129395 | 17.68723059 | 51.91322633 |
| Zn | 12.99707479 | 18.70243617 | 47.21554288 |
| O  | 12.99707330 | 18.67856696 | 49.26478707 |
| Zn | 14.65251783 | 17.70926531 | 49.84849696 |
| O  | 14.65285848 | 17.68723191 | 51.91324717 |
| Zn | 16.29858123 | 18.69379386 | 47.22111176 |
| O  | 16.30660587 | 18.68403834 | 49.27514585 |
| Zn | 17.97579215 | 17.75606938 | 49.88198948 |
| O  | 17.99204512 | 17.67369949 | 51.94691286 |
| Zn | 19.57111700 | 18.71605289 | 47.23003454 |
| O  | 19.64284481 | 18.67377183 | 49.27754057 |
| Zn | 21.40041284 | 17.65908104 | 49.87523117 |
| O  | 21.34125315 | 17.69280201 | 51.93641181 |
| Zn | 22.63218792 | 18.91927164 | 47.35670929 |
| O  | 22.91489121 | 18.69467229 | 49.21511211 |
| Zn | 3.34668069  | 20.41461129 | 49.95639347 |
| O  | 3.05220184  | 20.62948821 | 51.81494502 |
| Zn | 4.73093070  | 21.59761192 | 47.21039041 |
| O  | 4.76238119  | 21.56729208 | 49.23953515 |
| Zn | 6.39076561  | 20.57584517 | 49.88314475 |
| O  | 6.31167084  | 20.60260216 | 51.94797686 |
| Zn | 8.04013361  | 21.56189061 | 47.22196699 |
| O  | 8.02849273  | 21.55827446 | 49.27602279 |
| Zn | 9.68707956  | 20.59949447 | 49.83543965 |
| O  | 9.66294855  | 20.58522828 | 51.90140265 |
| Zn | 11.34553618 | 21.55863793 | 47.20937477 |
| O  | 11.34294735 | 21.55616409 | 49.25991332 |
| Zn | 12.99706875 | 20.59073772 | 49.82925248 |
| O  | 12.99707069 | 20.58305894 | 51.89473436 |
| Zn | 14.64861208 | 21.55863834 | 47.20938671 |
| O  | 14.65119682 | 21.55616335 | 49.25992644 |
| Zn | 16.30705859 | 20.59949407 | 49.83546988 |
| O  | 16.33119651 | 20.58522043 | 51.90143749 |
| Zn | 17.95400885 | 21.56189437 | 47.22199546 |
| O  | 17.96564441 | 21.55827539 | 49.27605296 |
| Zn | 19.60336978 | 20.57584667 | 49.88318548 |
| O  | 19.68246983 | 20.60258815 | 51.94802749 |
| Zn | 21.26320209 | 21.59762163 | 47.21041791 |
| O  | 21.23173934 | 21.56730871 | 49.23956223 |
| Zn | 22.64745064 | 20.41463456 | 49.95640732 |
| O  | 22.94192976 | 20.62954033 | 51.81495424 |
| Zn | 3.37373817  | 24.62510166 | 47.37291659 |
| O  | 3.12160969  | 24.40723889 | 49.23657649 |
| Zn | 4.68914258  | 23.43988576 | 49.89428254 |
| O  | 4.69036274  | 23.46699485 | 51.93816675 |
| Zn | 6.41938332  | 24.45202433 | 47.22667424 |

|    |             |             |             |
|----|-------------|-------------|-------------|
| O  | 6.36737518  | 24.43277380 | 49.27474937 |
| Zn | 8.01238529  | 23.47786331 | 49.85018348 |
| O  | 7.99344201  | 23.48831129 | 51.91505622 |
| Zn | 9.69845837  | 24.41725383 | 47.21681334 |
| O  | 9.67880105  | 24.42783144 | 49.26611768 |
| Zn | 11.33473201 | 23.47113738 | 49.82986366 |
| O  | 11.32823825 | 23.47488140 | 51.89536374 |
| Zn | 12.99707303 | 24.42004016 | 47.20984411 |
| O  | 12.99706960 | 24.42222698 | 49.26041133 |
| Zn | 14.65940190 | 23.47113750 | 49.82987459 |
| O  | 14.66589224 | 23.47487789 | 51.89537621 |
| Zn | 16.29568737 | 24.41725512 | 47.21683196 |
| O  | 16.31533779 | 24.42783152 | 49.26613872 |
| Zn | 17.98174779 | 23.47786113 | 49.85021779 |
| O  | 18.00068595 | 23.48829743 | 51.91509860 |
| Zn | 19.57475633 | 24.45203130 | 47.22670881 |
| O  | 19.62675299 | 24.43278114 | 49.27478473 |
| Zn | 21.30498557 | 23.43989443 | 49.89432974 |
| O  | 21.30375681 | 23.46701339 | 51.93821222 |
| Zn | 22.62039630 | 24.62510939 | 47.37296267 |
| O  | 22.87251720 | 24.40725153 | 49.23662365 |
| Zn | 3.33596010  | 26.11445604 | 50.03150564 |
| O  | 3.03946625  | 26.34521248 | 51.88442615 |
| Zn | 4.60765900  | 27.35615864 | 47.21160334 |
| O  | 4.69845166  | 27.30322915 | 49.24448934 |
| Zn | 6.38311660  | 26.33020266 | 49.90356719 |
| O  | 6.30224065  | 26.37666988 | 51.96115247 |
| Zn | 8.02865174  | 27.23972954 | 47.22667232 |
| O  | 8.01836588  | 27.29308963 | 49.27493220 |
| Zn | 9.66770619  | 26.34582926 | 49.85056039 |
| O  | 9.64923431  | 26.35739720 | 51.91552449 |
| Zn | 11.34150913 | 27.28144964 | 47.22252536 |
| O  | 11.33804470 | 27.29211167 | 49.27659863 |
| Zn | 12.99706474 | 26.33436246 | 49.83653915 |
| O  | 12.99706066 | 26.36263678 | 51.90259082 |
| Zn | 14.65263300 | 27.28145000 | 47.22253323 |
| O  | 14.65608855 | 27.29211205 | 49.27660711 |
| Zn | 16.32642316 | 26.34582976 | 49.85057855 |
| O  | 16.34488510 | 26.35739266 | 51.91554592 |
| Zn | 17.96548829 | 27.23973549 | 47.22669579 |
| O  | 17.97576228 | 27.29309578 | 49.27495654 |
| Zn | 19.61100811 | 26.33020978 | 49.90359993 |
| O  | 19.69187194 | 26.37667918 | 51.96118701 |
| Zn | 21.38648034 | 27.35616458 | 47.21164442 |
| O  | 21.29567624 | 27.30323694 | 49.24452902 |
| Zn | 22.65816113 | 26.11446395 | 50.03156067 |
| O  | 22.95464327 | 26.34522607 | 51.88448172 |

|    |             |             |             |
|----|-------------|-------------|-------------|
| Zn | 5.04645588  | 29.07760767 | 50.03200245 |
| O  | 4.69725929  | 29.21774513 | 51.88478576 |
| Zn | 6.35524265  | 29.79024904 | 47.37336266 |
| O  | 6.41736931  | 30.11710109 | 49.23704874 |
| Zn | 8.03868380  | 29.24272630 | 49.89464703 |
| O  | 8.01499082  | 29.22826288 | 51.93864816 |
| Zn | 9.65561185  | 30.12911682 | 47.21037869 |
| O  | 9.69681175  | 30.11601996 | 49.23958967 |
| Zn | 11.36929034 | 29.20157361 | 49.88383633 |
| O  | 11.30664567 | 29.25713805 | 51.94891854 |
| Zn | 12.99706943 | 30.10434616 | 47.23075408 |
| O  | 12.99706382 | 30.18685896 | 49.27845514 |
| Zn | 14.62483460 | 29.20157413 | 49.88384483 |
| O  | 14.68746749 | 29.25713804 | 51.94892696 |
| Zn | 16.33852505 | 30.12911983 | 47.21039284 |
| O  | 16.29731573 | 30.11602551 | 49.23960590 |
| Zn | 17.95543995 | 29.24273269 | 49.89467236 |
| O  | 17.97912053 | 29.22827045 | 51.93867391 |
| Zn | 19.63889239 | 29.79025428 | 47.37339389 |
| O  | 19.57675701 | 30.11710675 | 49.23707955 |
| Zn | 20.94766625 | 29.07761326 | 50.03204295 |
| O  | 21.29685038 | 29.21775556 | 51.88482804 |
| Zn | 9.98733665  | 31.91853697 | 49.95607359 |
| O  | 9.65254020  | 32.06573157 | 51.81435964 |
| Zn | 11.29038969 | 32.65382014 | 47.35702769 |
| O  | 11.34325017 | 33.01042164 | 49.21550742 |
| Zn | 12.99705872 | 32.21638574 | 49.87618957 |
| O  | 12.99705024 | 32.14879474 | 51.93705656 |
| Zn | 14.70374283 | 32.65382214 | 47.35703717 |
| O  | 14.65087013 | 33.01042336 | 49.21551704 |
| Zn | 16.00678184 | 31.91853930 | 49.95608843 |
| O  | 16.34156371 | 32.06573859 | 51.81437769 |
| Zn | 10.00907762 | 13.03018515 | 52.69003489 |
| O  | 9.67562301  | 12.92200421 | 54.55088178 |
| Zn | 11.20975141 | 12.29427039 | 55.46581692 |
| O  | 11.26064842 | 12.11162924 | 57.37030165 |
| Zn | 12.99705494 | 12.69264042 | 52.58711194 |
| O  | 12.99704257 | 12.79271889 | 54.64470080 |
| Zn | 14.78432069 | 12.29426718 | 55.46583231 |
| O  | 14.73341549 | 12.11162462 | 57.37031762 |
| Zn | 15.98502926 | 13.03018562 | 52.69006464 |
| O  | 16.31845817 | 12.92200550 | 54.55091588 |
| Zn | 5.01469170  | 15.84479605 | 52.59531947 |
| O  | 4.49373956  | 15.54082241 | 54.39860855 |
| Zn | 6.00374972  | 15.32428661 | 55.53511765 |
| O  | 6.09427379  | 15.19735620 | 57.46643308 |
| Zn | 7.98308086  | 15.68345329 | 52.54348817 |

|    |             |             |             |
|----|-------------|-------------|-------------|
| O  | 7.81580521  | 15.70816047 | 54.61789776 |
| Zn | 9.48410290  | 14.73849358 | 55.18882699 |
| O  | 9.57296693  | 14.89904720 | 57.27157614 |
| Zn | 11.35558777 | 15.76530678 | 52.50598079 |
| O  | 11.28616113 | 15.71713655 | 54.59945522 |
| Zn | 12.99704386 | 14.76187504 | 55.05386246 |
| O  | 12.99703174 | 14.81669626 | 57.22595510 |
| Zn | 14.63852598 | 15.76530427 | 52.50599262 |
| O  | 14.70792714 | 15.71713674 | 54.59946608 |
| Zn | 16.50995685 | 14.73850029 | 55.18886669 |
| O  | 16.42109723 | 14.89904758 | 57.27162309 |
| Zn | 18.01103126 | 15.68343483 | 52.54353187 |
| O  | 18.17824169 | 15.70814416 | 54.61793774 |
| Zn | 19.99024991 | 15.32418992 | 55.53521376 |
| O  | 19.89979723 | 15.19731425 | 57.46652737 |
| Zn | 20.97937518 | 15.84479533 | 52.59530826 |
| O  | 21.50016333 | 15.54096799 | 54.39865635 |
| Zn | 3.23388737  | 18.92992134 | 52.59679728 |
| O  | 2.71098940  | 18.63020830 | 54.40033869 |
| Zn | 3.78296173  | 17.18950097 | 54.97571320 |
| O  | 4.59324245  | 17.65398125 | 56.67915490 |
| Zn | 6.35203350  | 18.67340118 | 52.52506979 |
| O  | 6.49459134  | 18.75505139 | 54.55954793 |
| Zn | 8.07685775  | 17.63837204 | 54.91876260 |
| O  | 7.98165516  | 17.70935531 | 57.10239616 |
| Zn | 9.66932305  | 18.64967275 | 52.41691254 |
| O  | 9.72798116  | 18.65733468 | 54.51390156 |
| Zn | 11.35119654 | 17.63940222 | 55.00021968 |
| O  | 11.32660699 | 17.70076929 | 57.19681529 |
| Zn | 12.99707245 | 18.66059159 | 52.43364204 |
| O  | 12.99708725 | 18.64828593 | 54.53585416 |
| Zn | 14.64297898 | 17.63940566 | 55.00023364 |
| O  | 14.66746106 | 17.70076339 | 57.19682712 |
| Zn | 16.32482805 | 18.64966488 | 52.41695488 |
| O  | 16.26623328 | 18.65731669 | 54.51395358 |
| Zn | 17.91739215 | 17.63838773 | 54.91882213 |
| O  | 18.01239405 | 17.70934025 | 57.10249368 |
| Zn | 19.64211403 | 18.67339293 | 52.52509961 |
| O  | 19.49982386 | 18.75488367 | 54.55965267 |
| Zn | 22.21051353 | 17.18987293 | 54.97569514 |
| O  | 21.40074567 | 17.65403541 | 56.67944607 |
| Zn | 22.76020992 | 18.92997268 | 52.59679117 |
| O  | 23.28289485 | 18.63032499 | 54.40039325 |
| Zn | 3.27991828  | 20.04482511 | 55.53788043 |
| O  | 3.21837713  | 20.18290947 | 57.46957753 |
| Zn | 4.57877843  | 21.58117143 | 52.54623059 |
| O  | 4.51741509  | 21.42253480 | 54.62029180 |

|    |             |             |             |
|----|-------------|-------------|-------------|
| Zn | 6.31975769  | 20.68358156 | 54.91981116 |
| O  | 6.33503762  | 20.56362897 | 57.10327319 |
| Zn | 7.99035833  | 21.55888219 | 52.41786122 |
| O  | 8.02722269  | 21.60476249 | 54.51482124 |
| Zn | 9.66347614  | 20.58438952 | 54.96171813 |
| O  | 9.65925474  | 20.58059693 | 57.15455623 |
| Zn | 11.33104881 | 21.54898425 | 52.41673179 |
| O  | 11.33622742 | 21.55134084 | 54.50695027 |
| Zn | 12.99706453 | 20.58178671 | 54.99228511 |
| O  | 12.99704350 | 20.57621236 | 57.17860628 |
| Zn | 14.66309147 | 21.54898071 | 52.41674455 |
| O  | 14.65791339 | 21.55133356 | 54.50696332 |
| Zn | 16.33064950 | 20.58438351 | 54.96176006 |
| O  | 16.33483143 | 20.58060130 | 57.15459511 |
| Zn | 18.00378523 | 21.55887112 | 52.41791208 |
| O  | 17.96695311 | 21.60469798 | 54.51488407 |
| Zn | 19.67440383 | 20.68346390 | 54.91988200 |
| O  | 19.65904922 | 20.56368014 | 57.10338438 |
| Zn | 21.41535648 | 21.58119642 | 52.54629209 |
| O  | 21.47667485 | 21.42260830 | 54.62034626 |
| Zn | 22.71421730 | 20.04498160 | 55.53797926 |
| O  | 22.77573898 | 20.18295105 | 57.46967676 |
| Zn | 3.29540084  | 24.66203219 | 52.69476140 |
| O  | 3.03518836  | 24.42571668 | 54.55526556 |
| Zn | 4.51273585  | 23.35176608 | 55.19313104 |
| O  | 4.69849213  | 23.34671950 | 57.27474556 |
| Zn | 6.33652397  | 24.46156045 | 52.50935654 |
| O  | 6.26080765  | 24.42429399 | 54.60273561 |
| Zn | 7.95849218  | 23.51944775 | 55.00149361 |
| O  | 8.00055955  | 23.46544603 | 57.19804401 |
| Zn | 9.66384114  | 24.43657334 | 52.43516255 |
| O  | 9.65416155  | 24.44228153 | 54.53742052 |
| Zn | 11.32817146 | 23.47435117 | 54.99287712 |
| O  | 11.32460367 | 23.47537145 | 57.17915635 |
| Zn | 12.99706463 | 24.43597910 | 52.41724300 |
| O  | 12.99706124 | 24.42996792 | 54.50743045 |
| Zn | 14.66594399 | 23.47434695 | 54.99289318 |
| O  | 14.66948213 | 23.47537395 | 57.17916910 |
| Zn | 16.33028644 | 24.43656940 | 52.43518651 |
| O  | 16.33996783 | 24.44226272 | 54.53744786 |
| Zn | 18.03563209 | 23.51940743 | 55.00152733 |
| O  | 17.99352683 | 23.46547154 | 57.19807438 |
| Zn | 19.65759250 | 24.46157190 | 52.50939717 |
| O  | 19.73328602 | 24.42431417 | 54.60277455 |
| Zn | 21.48133302 | 23.35181364 | 55.19319902 |
| O  | 21.29558801 | 23.34674883 | 57.27482204 |
| Zn | 22.69870893 | 24.66205135 | 52.69483036 |

|    |             |             |             |
|----|-------------|-------------|-------------|
| O  | 22.95890272 | 24.42574530 | 54.55533726 |
| Zn | 3.25949251  | 26.06660258 | 55.47265932 |
| O  | 3.12900958  | 26.20018208 | 57.37722418 |
| Zn | 4.49645712  | 27.41894870 | 52.59311504 |
| O  | 4.58328480  | 27.36728035 | 54.65073401 |
| Zn | 6.28937988  | 26.38341515 | 55.05821511 |
| O  | 6.33908147  | 26.35457618 | 57.22997912 |
| Zn | 7.97751427  | 27.30525966 | 52.50939049 |
| O  | 7.97115763  | 27.38855972 | 54.60283906 |
| Zn | 9.60437226  | 26.37223737 | 55.00216793 |
| O  | 9.67041972  | 26.36032830 | 57.19863048 |
| Zn | 11.31814548 | 27.32538799 | 52.41905675 |
| O  | 11.29655486 | 27.27161036 | 54.51622942 |
| Zn | 12.99705169 | 26.36184078 | 54.96286353 |
| O  | 12.99704095 | 26.36637193 | 57.15566418 |
| Zn | 14.67597289 | 27.32538755 | 52.41906513 |
| O  | 14.69755426 | 27.27160607 | 54.51624037 |
| Zn | 16.38973425 | 26.37222638 | 55.00218642 |
| O  | 16.32366302 | 26.36034007 | 57.19864805 |
| Zn | 18.01659678 | 27.30526947 | 52.50941830 |
| O  | 18.02293725 | 27.38857011 | 54.60286627 |
| Zn | 19.70471092 | 26.38342982 | 55.05825922 |
| O  | 19.65499795 | 26.35459947 | 57.23003058 |
| Zn | 21.49764572 | 27.41895905 | 52.59316277 |
| O  | 21.41080482 | 27.36729890 | 54.65078281 |
| Zn | 22.73459859 | 26.06663613 | 55.47272357 |
| O  | 22.86507498 | 26.20021585 | 57.37728827 |
| Zn | 5.04573033  | 29.16413484 | 55.47277148 |
| O  | 4.86359375  | 29.20969416 | 57.37733772 |
| Zn | 6.28248571  | 29.83774584 | 52.69609062 |
| O  | 6.35510864  | 30.17984275 | 54.55697253 |
| Zn | 8.02448547  | 29.43777782 | 55.19429561 |
| O  | 8.12119792  | 29.28052530 | 57.27667025 |
| Zn | 9.59226070  | 30.26816585 | 52.54667271 |
| O  | 9.69676540  | 30.39890523 | 54.62089573 |
| Zn | 11.24101467 | 29.21134831 | 54.92166505 |
| O  | 11.34856992 | 29.25474199 | 57.10595155 |
| Zn | 12.99705554 | 30.18728246 | 52.52635375 |
| O  | 12.99705028 | 30.02864575 | 54.56226992 |
| Zn | 14.75308193 | 29.21134470 | 54.92167402 |
| O  | 14.64550897 | 29.25474704 | 57.10596380 |
| Zn | 16.40184788 | 30.26817297 | 52.54668966 |
| O  | 16.29732880 | 30.39890730 | 54.62090923 |
| Zn | 17.96960653 | 29.43778092 | 55.19432046 |
| O  | 17.87287949 | 29.28054167 | 57.27669662 |
| Zn | 19.71162147 | 29.83775749 | 52.69612619 |
| O  | 19.63898186 | 30.17985728 | 54.55700642 |

|    |             |             |             |
|----|-------------|-------------|-------------|
| Zn | 20.94835794 | 29.16415549 | 55.47281744 |
| O  | 21.13048490 | 29.20971901 | 57.37738298 |
| Zn | 10.26810573 | 32.15995360 | 55.53842156 |
| O  | 10.11829823 | 32.14662060 | 57.47002729 |
| Zn | 11.21508784 | 32.75806172 | 52.59647452 |
| O  | 11.21394545 | 33.35575251 | 54.40129201 |
| Zn | 12.99704306 | 33.13598327 | 54.97554156 |
| O  | 12.99702482 | 32.21495662 | 56.68552688 |
| Zn | 14.77900726 | 32.75806610 | 52.59647762 |
| O  | 14.78014026 | 33.35575632 | 54.40129659 |
| Zn | 15.72598542 | 32.15995549 | 55.53841995 |
| O  | 15.87576713 | 32.14662881 | 57.47002763 |
| Zn | 9.77505873  | 13.06244869 | 58.18874665 |
| Zn | 12.99703078 | 12.76865308 | 57.68969146 |
| Zn | 16.21901215 | 13.06243614 | 58.18875573 |
| Zn | 4.80048776  | 16.37183895 | 58.31299732 |
| Zn | 7.89384873  | 15.77542412 | 57.62175253 |
| Zn | 11.31158214 | 15.73714453 | 57.41039464 |
| Zn | 14.68247862 | 15.73714097 | 57.41042441 |
| Zn | 18.10022572 | 15.77539638 | 57.62185038 |
| Zn | 21.19367671 | 16.37174817 | 58.31310358 |
| Zn | 3.58877786  | 18.47396162 | 58.31461596 |
| Zn | 6.24752486  | 18.61137501 | 56.73246273 |
| Zn | 9.62700788  | 18.63772000 | 57.33967733 |
| Zn | 12.99703552 | 18.64810815 | 57.39577162 |
| Zn | 16.36704592 | 18.63772383 | 57.33971670 |
| Zn | 19.74649080 | 18.61142741 | 56.73281513 |
| Zn | 22.40543129 | 18.47394408 | 58.31472100 |
| Zn | 4.61686097  | 21.45458028 | 57.62493534 |
| Zn | 7.96126585  | 21.52507914 | 57.34020467 |
| Zn | 11.32649397 | 21.54441636 | 57.44233006 |
| Zn | 14.66758728 | 21.54442031 | 57.44236040 |
| Zn | 18.03280326 | 21.52511156 | 57.34025375 |
| Zn | 21.37724817 | 21.45461385 | 57.62504946 |
| Zn | 3.21299016  | 24.43994757 | 58.20034196 |
| Zn | 6.29287616  | 24.43461706 | 57.41280406 |
| Zn | 9.65523575  | 24.44001152 | 57.39640831 |
| Zn | 12.99704099 | 24.44047640 | 57.44292252 |
| Zn | 16.33884350 | 24.44002428 | 57.39642335 |
| Zn | 19.70120344 | 24.43464331 | 57.41287380 |
| Zn | 22.78109789 | 24.43998078 | 58.20040023 |
| Zn | 4.56474982  | 27.37717308 | 57.69521522 |
| Zn | 7.97808267  | 27.35557511 | 57.41457779 |
| Zn | 11.33043188 | 27.36549615 | 57.34131619 |
| Zn | 14.66364586 | 27.36550078 | 57.34132457 |
| Zn | 18.01599253 | 27.35559429 | 57.41461598 |
| Zn | 21.42932162 | 27.37719684 | 57.69527278 |

|    |             |             |             |
|----|-------------|-------------|-------------|
| Zn | 6.42948472  | 30.01817376 | 58.19950377 |
| Zn | 9.71823043  | 30.29933878 | 57.62652426 |
| Zn | 12.99704102 | 30.30452651 | 56.74137286 |
| Zn | 16.27584102 | 30.29934911 | 57.62653548 |
| Zn | 19.56458908 | 30.01818968 | 58.19954735 |
| Zn | 11.78274567 | 32.68770015 | 58.31381190 |
| Zn | 14.21131950 | 32.68770693 | 58.31380887 |

**WZ-1026**

|   |             |             |             |
|---|-------------|-------------|-------------|
| O | 16.24631435 | 14.94170196 | 50.85779350 |
| O | 11.31822684 | 17.81707174 | 50.95781673 |
| O | 14.60735385 | 17.78089587 | 51.22242674 |
| O | 17.88528747 | 17.78089583 | 51.22242798 |
| O | 21.17443084 | 17.81704628 | 50.95781454 |
| O | 6.37251524  | 20.56611136 | 51.11122770 |
| O | 9.68274083  | 20.65180078 | 51.22659453 |
| O | 12.96198714 | 20.58370601 | 51.32221355 |
| O | 16.24631946 | 20.61908087 | 51.27359624 |
| O | 19.53065908 | 20.58370232 | 51.32221542 |
| O | 22.80990047 | 20.65182168 | 51.22634596 |
| O | 26.12019867 | 20.56629881 | 51.11056508 |
| O | 4.75193094  | 23.37271008 | 51.11163292 |
| O | 8.01922656  | 23.38877522 | 51.32466706 |
| O | 11.33131427 | 23.44761620 | 51.30358315 |
| O | 14.60447883 | 23.41752113 | 51.33142295 |
| O | 17.88816902 | 23.41752631 | 51.33142690 |
| O | 21.16134674 | 23.44764090 | 51.30356417 |
| O | 24.47345552 | 23.38884997 | 51.32442315 |
| O | 27.74081588 | 23.37274179 | 51.11179081 |
| O | 6.48059526  | 26.19786063 | 51.22667931 |
| O | 9.72562770  | 26.22882484 | 51.30400795 |
| O | 12.98437474 | 26.25675768 | 51.33661473 |
| O | 16.24633021 | 26.24658895 | 51.34282453 |
| O | 19.50828844 | 26.25677777 | 51.33662446 |
| O | 22.76705016 | 26.22887269 | 51.30401983 |
| O | 26.01210991 | 26.19788916 | 51.22667611 |
| O | 4.84364743  | 29.03257373 | 50.95903299 |
| O | 8.06075408  | 29.07299954 | 51.32330926 |
| O | 11.33572125 | 29.07948077 | 51.33223639 |
| O | 14.60636049 | 29.08734697 | 51.34318853 |
| O | 17.88631188 | 29.08735842 | 51.34319659 |
| O | 21.15695667 | 29.07951450 | 51.33226618 |
| O | 24.43194794 | 29.07303523 | 51.32336380 |
| O | 27.64906120 | 29.03258919 | 50.95908250 |
| O | 6.45644310  | 31.89991991 | 51.22433672 |
| O | 9.73343744  | 31.90061833 | 51.27522028 |



|    |             |             |             |
|----|-------------|-------------|-------------|
| O  | 12.97759438 | 31.92382625 | 51.33258165 |
| O  | 16.24633707 | 31.90748662 | 51.33735887 |
| O  | 19.51508648 | 31.92384448 | 51.33259922 |
| O  | 22.75925991 | 31.90065280 | 51.27526619 |
| O  | 26.03631028 | 31.89997328 | 51.22442202 |
| O  | 4.81681449  | 34.73933532 | 50.85920709 |
| O  | 8.09528282  | 34.73933529 | 51.22490443 |
| O  | 11.34520794 | 34.76328671 | 51.32438831 |
| O  | 14.64068244 | 34.74375554 | 51.30533204 |
| O  | 17.85199608 | 34.74375803 | 51.30533539 |
| O  | 21.14748110 | 34.76330592 | 51.32441861 |
| O  | 24.39745490 | 34.73940586 | 51.22498172 |
| O  | 27.67569519 | 34.73927319 | 50.85942879 |
| O  | 9.77159834  | 37.56999251 | 50.96015791 |
| O  | 13.04454950 | 37.56946843 | 51.22842402 |
| O  | 16.24633485 | 37.64166360 | 51.32692299 |
| O  | 19.44812498 | 37.56947256 | 51.22844445 |
| O  | 22.72107444 | 37.57000729 | 50.96019797 |
| O  | 14.62581836 | 40.47935607 | 51.11449134 |
| O  | 17.86686097 | 40.47935748 | 51.11451155 |
| Zn | 14.90606670 | 15.95661979 | 51.63388267 |
| O  | 14.59928346 | 15.79477116 | 53.52704362 |
| Zn | 16.24633034 | 15.23374807 | 54.31273547 |
| O  | 16.24634001 | 14.85970360 | 56.17523668 |
| Zn | 17.58656805 | 15.95661153 | 51.63387878 |
| O  | 17.89337313 | 15.79477025 | 53.52703429 |
| Zn | 10.03128958 | 18.85913519 | 51.70278874 |
| O  | 9.62698821  | 18.66665467 | 53.56816988 |
| Zn | 11.21033578 | 18.04878391 | 54.39770690 |
| O  | 11.30125270 | 17.68809292 | 56.25445128 |
| Zn | 12.92609026 | 18.64080115 | 51.50677200 |
| O  | 12.90401745 | 18.62659405 | 53.65977691 |
| Zn | 14.54375266 | 17.66333987 | 54.18550576 |
| O  | 14.58974847 | 17.64695267 | 56.25249302 |
| Zn | 16.24632565 | 18.74445144 | 51.60889254 |
| O  | 16.24633964 | 18.62742076 | 53.73010290 |
| Zn | 17.94892050 | 17.66333326 | 54.18550360 |
| O  | 17.90294253 | 17.64694344 | 56.25248929 |
| Zn | 19.56655944 | 18.64079012 | 51.50677172 |
| O  | 19.58865849 | 18.62659500 | 53.65976717 |
| Zn | 21.28238140 | 18.04881484 | 54.39765207 |
| O  | 21.19145686 | 17.68812236 | 56.25439353 |
| Zn | 22.46139840 | 18.85916379 | 51.70266532 |
| O  | 22.86568820 | 18.66668803 | 53.56804950 |
| Zn | 5.06195732  | 21.68040577 | 51.72033301 |
| O  | 4.69420428  | 21.46801499 | 53.59977910 |
| Zn | 6.29772312  | 20.77924852 | 54.41826121 |

|    |             |             |             |
|----|-------------|-------------|-------------|
| O  | 6.33363209  | 20.50862936 | 56.29398382 |
| Zn | 7.97855485  | 21.44917847 | 51.53125903 |
| O  | 7.95661474  | 21.45291599 | 53.68971993 |
| Zn | 9.59945953  | 20.52746041 | 54.24947517 |
| O  | 9.64162539  | 20.51909657 | 56.29637620 |
| Zn | 11.34103592 | 21.56822940 | 51.62541347 |
| O  | 11.27819395 | 21.48642095 | 53.75480411 |
| Zn | 12.95350663 | 20.54912458 | 54.24960885 |
| O  | 12.94837052 | 20.50533735 | 56.31971169 |
| Zn | 14.59950331 | 21.52381269 | 51.63961180 |
| O  | 14.60677290 | 21.49239780 | 53.76561666 |
| Zn | 16.24633255 | 20.51918271 | 54.28742910 |
| O  | 16.24634538 | 20.52871285 | 56.34229288 |
| Zn | 17.89314023 | 21.52381230 | 51.63960822 |
| O  | 17.88590010 | 21.49240151 | 53.76561384 |
| Zn | 19.53917693 | 20.54913251 | 54.24958843 |
| O  | 19.54432442 | 20.50533924 | 56.31969385 |
| Zn | 21.15163126 | 21.56823609 | 51.62534812 |
| O  | 21.21450198 | 21.48642147 | 53.75473979 |
| Zn | 22.89328659 | 20.52749862 | 54.24934679 |
| O  | 22.85107958 | 20.51910304 | 56.29627619 |
| Zn | 24.51412535 | 21.44923909 | 51.53061218 |
| O  | 24.53609001 | 21.45290984 | 53.68937677 |
| Zn | 26.19487038 | 20.77927812 | 54.41815008 |
| O  | 26.15902205 | 20.50863758 | 56.29387119 |
| Zn | 27.43069547 | 21.68033662 | 51.72023462 |
| O  | 27.79843340 | 21.46797492 | 53.59966398 |
| Zn | 4.89851642  | 23.20097924 | 54.41817171 |
| O  | 4.68203743  | 23.36879834 | 56.29385208 |
| Zn | 6.31911108  | 24.32325036 | 51.53119639 |
| O  | 6.31053633  | 24.30249871 | 53.68997659 |
| Zn | 8.01497145  | 23.38693330 | 54.23388389 |
| O  | 7.97665515  | 23.36470770 | 56.30822819 |
| Zn | 9.65603165  | 24.33450496 | 51.61616461 |
| O  | 9.65720567  | 24.33524471 | 53.75559869 |
| Zn | 11.30376775 | 23.38678333 | 54.29693683 |
| O  | 11.29616442 | 23.38721304 | 56.35275284 |
| Zn | 12.97293307 | 24.37062022 | 51.65960285 |
| O  | 12.95544049 | 24.34164975 | 53.78333723 |
| Zn | 14.60152674 | 23.38821622 | 54.31577786 |
| O  | 14.59561855 | 23.38085901 | 56.36750090 |
| Zn | 16.24632614 | 24.35549027 | 51.66342458 |
| O  | 16.24632924 | 24.34419934 | 53.78836191 |
| Zn | 17.89112717 | 23.38822226 | 54.31578145 |
| O  | 17.89706612 | 23.38085668 | 56.36750455 |
| Zn | 19.51972291 | 24.37063507 | 51.65959820 |
| O  | 19.53722497 | 24.34165127 | 53.78333552 |

|    |             |             |             |
|----|-------------|-------------|-------------|
| Zn | 21.18890702 | 23.38678369 | 54.29690575 |
| O  | 21.19652459 | 23.38720710 | 56.35272871 |
| Zn | 22.83664710 | 24.33453921 | 51.61609549 |
| O  | 22.83548201 | 24.33523916 | 53.75554021 |
| Zn | 24.47769714 | 23.38686574 | 54.23378909 |
| O  | 24.51601964 | 23.36468303 | 56.30816065 |
| Zn | 26.17359171 | 24.32327288 | 51.53115540 |
| O  | 26.18211919 | 24.30249077 | 53.68993940 |
| Zn | 27.59416071 | 23.20094201 | 54.41807641 |
| O  | 27.81062567 | 23.36876467 | 56.29376654 |
| Zn | 5.10273297  | 27.39634774 | 51.70259051 |
| O  | 4.73360048  | 27.14309247 | 53.56829359 |
| Zn | 6.33053057  | 26.18787001 | 54.25017020 |
| O  | 6.34481902  | 26.22921518 | 56.29697990 |
| Zn | 8.10282166  | 27.17684723 | 51.62597014 |
| O  | 8.00014938  | 27.16323384 | 53.75540969 |
| Zn | 9.65896895  | 26.23542305 | 54.29718658 |
| O  | 9.65565046  | 26.22873114 | 56.35303292 |
| Zn | 11.34523967 | 27.18994993 | 51.66001963 |
| O  | 11.31155010 | 27.18886855 | 53.78373116 |
| Zn | 12.95523852 | 26.23962258 | 54.32533243 |
| O  | 12.95274462 | 26.23823551 | 56.37541965 |
| Zn | 14.61694817 | 27.19967635 | 51.67719044 |
| O  | 14.60370674 | 27.19167685 | 53.79881512 |
| Zn | 16.24632331 | 26.23879657 | 54.33539551 |
| O  | 16.24634004 | 26.23558735 | 56.38441890 |
| Zn | 17.87571462 | 27.19968841 | 51.67719597 |
| O  | 17.88894919 | 27.19167877 | 53.79882234 |
| Zn | 19.53741512 | 26.23962514 | 54.32534462 |
| O  | 19.53993750 | 26.23823101 | 56.37543223 |
| Zn | 21.14742689 | 27.18998384 | 51.66003495 |
| O  | 21.18111873 | 27.18887023 | 53.78374934 |
| Zn | 22.83370499 | 26.23541421 | 54.29719261 |
| O  | 22.83703485 | 26.22872128 | 56.35304233 |
| Zn | 24.38988196 | 27.17686995 | 51.62598355 |
| O  | 24.49253158 | 27.16323459 | 53.75542643 |
| Zn | 26.16214697 | 26.18785126 | 54.25018776 |
| O  | 26.14786553 | 26.22919940 | 56.29699311 |
| Zn | 27.38999370 | 27.39635288 | 51.70261160 |
| O  | 27.75907581 | 27.14309363 | 53.56831291 |
| Zn | 4.98992724  | 28.82274693 | 54.39864823 |
| O  | 4.72336923  | 29.08208342 | 56.25542886 |
| Zn | 6.36045667  | 30.01388462 | 51.50825556 |
| O  | 6.33672160  | 30.00144446 | 53.66104050 |
| Zn | 8.02633217  | 29.08281986 | 54.25052592 |
| O  | 7.98614525  | 29.10055856 | 56.32054893 |
| Zn | 9.69316691  | 30.02197601 | 51.64084938 |

|    |             |             |             |
|----|-------------|-------------|-------------|
| O  | 9.66972811  | 30.04346959 | 53.76668561 |
| Zn | 11.30915000 | 29.09108574 | 54.31642776 |
| O  | 11.29991577 | 29.08978706 | 56.36810411 |
| Zn | 12.96864838 | 30.03290852 | 51.66417986 |
| O  | 12.95918104 | 30.03806667 | 53.78908359 |
| Zn | 14.60001569 | 29.09057096 | 54.33566255 |
| O  | 14.59720089 | 29.09236557 | 56.38469117 |
| Zn | 16.24633811 | 30.02211219 | 51.67745963 |
| O  | 16.24632817 | 30.03706596 | 53.79913447 |
| Zn | 17.89263347 | 29.09057384 | 54.33567108 |
| O  | 17.89547588 | 29.09236434 | 56.38469918 |
| Zn | 19.52402904 | 30.03292780 | 51.66419612 |
| O  | 19.53348062 | 30.03806919 | 53.78910093 |
| Zn | 21.18350772 | 29.09108942 | 54.31645489 |
| O  | 21.19276525 | 29.08978496 | 56.36813117 |
| Zn | 22.79952778 | 30.02200577 | 51.64088276 |
| O  | 22.82294249 | 30.04347842 | 53.76672109 |
| Zn | 24.46634375 | 29.08282990 | 54.25056210 |
| O  | 24.50653568 | 29.10055287 | 56.32058641 |
| Zn | 26.13226119 | 30.01392173 | 51.50829687 |
| O  | 26.15596517 | 30.00145573 | 53.66108423 |
| Zn | 27.50276287 | 28.82274729 | 54.39867724 |
| O  | 27.76930454 | 29.08206697 | 56.25545963 |
| Zn | 5.02625297  | 33.07130798 | 51.63571751 |
| O  | 4.73217053  | 32.88590920 | 53.52893122 |
| Zn | 6.32246171  | 31.90297140 | 54.18712955 |
| O  | 6.33175685  | 31.95132130 | 56.25395132 |
| Zn | 8.11008106  | 32.83811035 | 51.61063194 |
| O  | 8.00855820  | 32.89619570 | 53.73197275 |
| Zn | 9.64706073  | 31.94999456 | 54.28847419 |
| O  | 9.65569892  | 31.94543131 | 56.34335416 |
| Zn | 11.34006617 | 32.87499292 | 51.64112132 |
| O  | 11.30942061 | 32.88406082 | 53.76704615 |
| Zn | 12.95392405 | 31.94042305 | 54.31671865 |
| O  | 12.95065095 | 31.94947369 | 56.36839489 |
| Zn | 14.61863176 | 32.86046396 | 51.66069665 |
| O  | 14.60251485 | 32.88968034 | 53.78444524 |
| Zn | 16.24632648 | 31.94059394 | 54.32595008 |
| O  | 16.24633645 | 31.94378489 | 56.37602524 |
| Zn | 17.87405078 | 32.86046504 | 51.66070393 |
| O  | 17.89014848 | 32.88967888 | 53.78445286 |
| Zn | 19.53873470 | 31.94042897 | 54.31673669 |
| O  | 19.54202475 | 31.94947350 | 56.36841264 |
| Zn | 21.15262210 | 32.87501499 | 51.64114969 |
| O  | 21.18325153 | 32.88406417 | 53.76707523 |
| Zn | 22.84561030 | 31.95000848 | 54.28851358 |
| O  | 22.83698656 | 31.94543625 | 56.34339151 |

|    |             |             |             |
|----|-------------|-------------|-------------|
| Zn | 24.38263097 | 32.83814650 | 51.61065838 |
| O  | 24.48412257 | 32.89620606 | 53.73200154 |
| Zn | 26.17022674 | 31.90299003 | 54.18716922 |
| O  | 26.16092791 | 31.95132284 | 56.25399079 |
| Zn | 27.46666394 | 33.07116763 | 51.63566838 |
| O  | 27.76049581 | 32.88591966 | 53.52887850 |
| Zn | 5.06984141  | 34.59262827 | 54.31461969 |
| O  | 4.74661908  | 34.78012604 | 56.17719285 |
| Zn | 6.36571607  | 35.39232248 | 51.63620700 |
| O  | 6.37891102  | 35.73910839 | 53.52938931 |
| Zn | 8.02506900  | 34.85285731 | 54.18724008 |
| O  | 7.98863685  | 34.82116929 | 56.25409927 |
| Zn | 9.68044403  | 35.76573928 | 51.50935073 |
| O  | 9.67901561  | 35.79186199 | 53.66189311 |
| Zn | 11.31930544 | 34.78750578 | 54.25099321 |
| O  | 11.28423227 | 34.81398038 | 56.32105794 |
| Zn | 13.00821723 | 35.67509959 | 51.62715831 |
| O  | 12.96871182 | 35.77015885 | 53.75665071 |
| Zn | 14.60166456 | 34.79743106 | 54.29822829 |
| O  | 14.60603512 | 34.80418535 | 56.35405079 |
| Zn | 16.24634414 | 35.75124824 | 51.61785078 |
| O  | 16.24633719 | 35.74948139 | 53.75724759 |
| Zn | 17.89100343 | 34.79743026 | 54.29823865 |
| O  | 17.88663795 | 34.80418420 | 56.35406057 |
| Zn | 19.48446455 | 35.67509933 | 51.62717110 |
| O  | 19.52395814 | 35.77015786 | 53.75666005 |
| Zn | 21.17336699 | 34.78751388 | 54.25101654 |
| O  | 21.20844004 | 34.81398269 | 56.32108176 |
| Zn | 22.81225164 | 35.76576681 | 51.50938386 |
| O  | 22.81366178 | 35.79187319 | 53.66192400 |
| Zn | 24.46760945 | 34.85287530 | 54.18727516 |
| O  | 24.50403632 | 34.82117299 | 56.25413463 |
| Zn | 26.12692267 | 35.39264155 | 51.63615704 |
| O  | 26.11374857 | 35.73912362 | 53.52934100 |
| Zn | 27.42278141 | 34.59261784 | 54.31467765 |
| O  | 27.74605342 | 34.78013098 | 56.17725922 |
| Zn | 10.02557658 | 37.54773530 | 54.39942415 |
| O  | 9.66822376  | 37.64916154 | 56.25632804 |
| Zn | 11.31779965 | 38.16363717 | 51.70454517 |
| O  | 11.35250226 | 38.60990167 | 53.57007863 |
| Zn | 12.97775745 | 37.70356073 | 54.25159780 |
| O  | 12.94991691 | 37.67123262 | 56.29833602 |
| Zn | 14.58702291 | 38.64673143 | 51.53362028 |
| O  | 14.60076287 | 38.66367624 | 53.69209118 |
| Zn | 16.24633732 | 37.64578939 | 54.23586378 |
| O  | 16.24633633 | 37.69060273 | 56.31005972 |
| Zn | 17.90565386 | 38.64673653 | 51.53363447 |

|    |             |             |             |
|----|-------------|-------------|-------------|
| O  | 17.89191040 | 38.66367749 | 53.69210525 |
| Zn | 19.51491324 | 37.70356284 | 54.25160778 |
| O  | 19.54275279 | 37.67123444 | 56.29834385 |
| Zn | 21.17486292 | 38.16365492 | 51.70455781 |
| O  | 21.14017190 | 38.60990857 | 53.57008984 |
| Zn | 22.46710735 | 37.54775460 | 54.39943932 |
| O  | 22.82444801 | 37.64916271 | 56.25634779 |
| Zn | 14.84751593 | 40.43713289 | 54.42061908 |
| O  | 14.59484279 | 40.54176093 | 56.29630437 |
| Zn | 16.24633491 | 41.05691618 | 51.72334439 |
| O  | 16.24633623 | 41.48108277 | 53.60277676 |
| Zn | 17.64515100 | 40.43713097 | 54.42062673 |
| O  | 17.89781730 | 40.54176447 | 56.29631151 |
| Zn | 14.84990052 | 15.87094811 | 57.03789753 |
| O  | 14.59598148 | 15.76298492 | 58.90766067 |
| Zn | 16.24634613 | 15.17045275 | 59.69328163 |
| O  | 16.24635029 | 14.83933215 | 61.56555764 |
| Zn | 17.64278574 | 15.87094308 | 57.03789815 |
| O  | 17.89671848 | 15.76297809 | 58.90766135 |
| Zn | 9.97549331  | 18.75640822 | 57.08574038 |
| O  | 9.64884058  | 18.65040272 | 58.94439969 |
| Zn | 11.25704094 | 18.02334786 | 59.73142214 |
| O  | 11.33596969 | 17.68720706 | 61.59206867 |
| Zn | 12.95017182 | 18.57053137 | 56.89496904 |
| O  | 12.95037128 | 18.62088667 | 58.93057392 |
| Zn | 14.56743431 | 17.63069644 | 59.54455597 |
| O  | 14.60598869 | 17.66041011 | 61.58118734 |
| Zn | 16.24634547 | 18.63611398 | 56.88266450 |
| O  | 16.24634991 | 18.59989834 | 58.92878670 |
| Zn | 17.92526769 | 17.63068954 | 59.54454855 |
| O  | 17.88671806 | 17.66040539 | 61.58118203 |
| Zn | 19.54253289 | 18.57052244 | 56.89494457 |
| O  | 19.54232861 | 18.62087776 | 58.93055796 |
| Zn | 21.23566455 | 18.02334273 | 59.73139912 |
| O  | 21.15674478 | 17.68720664 | 61.59204968 |
| Zn | 22.51720610 | 18.75643711 | 57.08569338 |
| O  | 22.84384838 | 18.65039953 | 58.94435483 |
| Zn | 5.00336170  | 21.64749304 | 57.07362688 |
| O  | 4.71787109  | 21.48182756 | 58.94459468 |
| Zn | 6.32333795  | 20.78817755 | 59.74516652 |
| O  | 6.37183703  | 20.51888428 | 61.61601424 |
| Zn | 7.97724015  | 21.42878882 | 56.90242851 |
| O  | 7.98480094  | 21.47127324 | 58.94261456 |
| Zn | 9.61178593  | 20.51375384 | 59.57732532 |
| O  | 9.66414442  | 20.54012475 | 61.60384175 |
| Zn | 11.31540027 | 21.48989515 | 56.91116197 |
| O  | 11.28771733 | 21.47120823 | 58.95767818 |

|    |             |             |             |
|----|-------------|-------------|-------------|
| Zn | 12.95646663 | 20.54790122 | 59.56490031 |
| O  | 12.95670683 | 20.51913689 | 61.60332345 |
| Zn | 14.58584314 | 21.46943545 | 56.92417531 |
| O  | 14.60271231 | 21.47559775 | 58.96713091 |
| Zn | 16.24634901 | 20.49616802 | 59.54798323 |
| O  | 16.24635287 | 20.52947587 | 61.59225245 |
| Zn | 17.90685008 | 21.46943204 | 56.92417188 |
| O  | 17.88998851 | 21.47559325 | 58.96712785 |
| Zn | 19.53623622 | 20.54789391 | 59.56489226 |
| O  | 19.53600254 | 20.51913023 | 61.60331765 |
| Zn | 21.17730467 | 21.48988485 | 56.91113283 |
| O  | 21.20498537 | 21.47119688 | 58.95765425 |
| Zn | 22.88091079 | 20.51373651 | 59.57732319 |
| O  | 22.82856024 | 20.54011439 | 61.60383971 |
| Zn | 24.51544551 | 21.42877999 | 56.90240359 |
| O  | 24.50789204 | 21.47125914 | 58.94258851 |
| Zn | 26.16935332 | 20.78816345 | 59.74514908 |
| O  | 26.12085820 | 20.51887517 | 61.61599624 |
| Zn | 27.48930409 | 21.64746512 | 57.07355098 |
| O  | 27.77479143 | 21.48180782 | 58.94452367 |
| Zn | 4.91992655  | 23.21872451 | 59.74534908 |
| O  | 4.71049903  | 23.39658886 | 61.61607668 |
| Zn | 6.30017890  | 24.33291291 | 56.90271341 |
| O  | 6.34149241  | 24.31722932 | 58.94288739 |
| Zn | 8.02897659  | 23.39406949 | 59.58046072 |
| O  | 7.99981772  | 23.37746209 | 61.61019063 |
| Zn | 9.62029163  | 24.31398522 | 56.91225329 |
| O  | 9.65055836  | 24.33062277 | 58.96054953 |
| Zn | 11.29930907 | 23.37349571 | 59.56897995 |
| O  | 11.30352426 | 23.39117195 | 61.60767647 |
| Zn | 12.94590551 | 24.33394951 | 56.95194610 |
| O  | 12.94891958 | 24.33037790 | 58.98941097 |
| Zn | 14.59966475 | 23.37729626 | 59.58489490 |
| O  | 14.59859448 | 23.38159285 | 61.62035466 |
| Zn | 16.24634195 | 24.32761475 | 56.95894341 |
| O  | 16.24634831 | 24.33296101 | 58.99520066 |
| Zn | 17.89302890 | 23.37729203 | 59.58489640 |
| O  | 17.89411163 | 23.38158584 | 61.62035722 |
| Zn | 19.54678576 | 24.33394067 | 56.95194947 |
| O  | 19.54377936 | 24.33036780 | 58.98941614 |
| Zn | 21.19338762 | 23.37347864 | 59.56897923 |
| O  | 21.18917999 | 23.39115882 | 61.60767794 |
| Zn | 22.87240398 | 24.31396890 | 56.91224306 |
| O  | 22.84213373 | 24.33061197 | 58.96054244 |
| Zn | 24.46371610 | 23.39405975 | 59.58046092 |
| O  | 24.49287898 | 23.37745095 | 61.61019116 |
| Zn | 26.19250556 | 24.33287805 | 56.90267250 |

|    |             |             |             |
|----|-------------|-------------|-------------|
| O  | 26.15119465 | 24.31721330 | 58.94286162 |
| Zn | 27.57275248 | 23.21868708 | 59.74531503 |
| O  | 27.78218171 | 23.39656116 | 61.61604162 |
| Zn | 4.98573913  | 27.39993379 | 57.08698921 |
| O  | 4.73101610  | 27.16921345 | 58.94553204 |
| Zn | 6.32614933  | 26.20483275 | 59.57803471 |
| O  | 6.37526939  | 26.23751238 | 61.60447385 |
| Zn | 8.02216589  | 27.19415687 | 56.91172295 |
| O  | 7.99294669  | 27.17821125 | 58.95824071 |
| Zn | 9.64635012  | 26.23681926 | 59.56920493 |
| O  | 9.66352081  | 26.23229091 | 61.60791512 |
| Zn | 11.30015669 | 27.18454804 | 56.95216950 |
| O  | 11.29943023 | 27.18768965 | 58.98965147 |
| Zn | 12.94698566 | 26.23388404 | 59.59418396 |
| O  | 12.95398912 | 26.23831542 | 61.62793484 |
| Zn | 14.59842986 | 27.18871175 | 56.96966547 |
| O  | 14.59742124 | 27.18727496 | 59.00454440 |
| Zn | 16.24634235 | 26.23486437 | 59.60163431 |
| O  | 16.24635056 | 26.23612896 | 61.63482052 |
| Zn | 17.89425070 | 27.18870907 | 56.96967382 |
| O  | 17.89526868 | 27.18727083 | 59.00455308 |
| Zn | 19.54570237 | 26.23387449 | 59.59419639 |
| O  | 19.53871159 | 26.23830711 | 61.62794732 |
| Zn | 21.19252931 | 27.18454062 | 56.95218927 |
| O  | 21.19326033 | 27.18768143 | 58.98967142 |
| Zn | 22.84634301 | 26.23680571 | 59.56922007 |
| O  | 22.82918017 | 26.23227952 | 61.60793277 |
| Zn | 24.47051975 | 27.19414657 | 56.91174589 |
| O  | 24.49974625 | 27.17819922 | 58.95826265 |
| Zn | 26.16654300 | 26.20480871 | 59.57804893 |
| O  | 26.11742782 | 26.23749728 | 61.60448717 |
| Zn | 27.50693781 | 27.39991515 | 57.08701606 |
| O  | 27.76167824 | 27.16920258 | 58.94555635 |
| Zn | 4.99223968  | 28.87531474 | 59.73279408 |
| O  | 4.74066796  | 29.11190129 | 61.59338983 |
| Zn | 6.31152572  | 30.06959613 | 56.89621089 |
| O  | 6.35600420  | 30.04335122 | 58.93170099 |
| Zn | 8.02803056  | 29.08486060 | 59.56576139 |
| O  | 8.00318960  | 29.10015295 | 61.60403782 |
| Zn | 9.63963619  | 30.03703483 | 56.92489617 |
| O  | 9.65422305  | 30.04734242 | 58.96784590 |
| Zn | 11.29980002 | 29.09363363 | 59.58529396 |
| O  | 11.30277208 | 29.09119207 | 61.62072838 |
| Zn | 12.94490805 | 30.04651783 | 56.95943808 |
| O  | 12.95034074 | 30.04267434 | 58.99568885 |
| Zn | 14.59746097 | 29.09127563 | 59.60184947 |
| O  | 14.59821945 | 29.09133739 | 61.63501899 |



|    |             |             |             |
|----|-------------|-------------|-------------|
| Zn | 16.24633746 | 30.04334830 | 56.96992497 |
| O  | 16.24634137 | 30.04377995 | 59.00480395 |
| Zn | 17.89521798 | 29.09127233 | 59.60185708 |
| O  | 17.89447641 | 29.09133435 | 61.63502587 |
| Zn | 19.54776803 | 30.04651654 | 56.95945574 |
| O  | 19.54234338 | 30.04266931 | 58.99570627 |
| Zn | 21.19288345 | 29.09362627 | 59.58531606 |
| O  | 21.18992597 | 29.09118560 | 61.62075098 |
| Zn | 22.85304320 | 30.03703637 | 56.92493155 |
| O  | 22.83846362 | 30.04733856 | 58.96787871 |
| Zn | 24.46465945 | 29.08485267 | 59.56578988 |
| O  | 24.48950512 | 29.10014216 | 61.60406748 |
| Zn | 26.18115917 | 30.06959409 | 56.89624268 |
| O  | 26.13668428 | 30.04334788 | 58.93173436 |
| Zn | 27.50045592 | 28.87530508 | 59.73281662 |
| O  | 27.75202153 | 29.11189336 | 61.59341437 |
| Zn | 4.92432302  | 33.06520857 | 57.03959000 |
| O  | 4.70427168  | 32.89778916 | 58.90926205 |
| Zn | 6.30767450  | 31.93880044 | 59.54550275 |
| O  | 6.35282633  | 31.95778410 | 61.58202701 |
| Zn | 8.01664668  | 32.89176776 | 56.88353279 |
| O  | 7.98613079  | 32.90892871 | 58.92977245 |
| Zn | 9.62850762  | 31.96037559 | 59.54858069 |
| O  | 9.65738231  | 31.94433223 | 61.59282525 |
| Zn | 11.30023048 | 32.91382409 | 56.92513721 |
| O  | 11.29802710 | 32.89511365 | 58.96805337 |
| Zn | 12.94650266 | 31.94640345 | 59.58550442 |
| O  | 12.95056729 | 31.94590533 | 61.62092425 |
| Zn | 14.60065418 | 32.90205751 | 56.95273383 |
| O  | 14.59691022 | 32.90019980 | 58.99020073 |
| Zn | 16.24633746 | 31.94958979 | 59.59465511 |
| O  | 16.24634438 | 31.94208143 | 61.62837647 |
| Zn | 17.89201842 | 32.90205736 | 56.95274349 |
| O  | 17.89576857 | 32.90019531 | 58.99020928 |
| Zn | 19.54617606 | 31.94640056 | 59.58552037 |
| O  | 19.54212358 | 31.94590041 | 61.62094020 |
| Zn | 21.19244568 | 32.91382534 | 56.92516448 |
| O  | 21.19465559 | 32.89510990 | 58.96807902 |
| Zn | 22.86417899 | 31.96037558 | 59.54861201 |
| O  | 22.83531515 | 31.94433040 | 61.59285834 |
| Zn | 24.47604027 | 32.89177612 | 56.88356954 |
| O  | 24.50655806 | 32.90892962 | 58.92980780 |
| Zn | 26.18501493 | 31.93879938 | 59.54554041 |
| O  | 26.13986840 | 31.95777992 | 61.58205991 |
| Zn | 27.56836594 | 33.06520278 | 57.03962358 |
| O  | 27.78841998 | 32.89778846 | 58.90929465 |
| Zn | 5.01655861  | 34.62329066 | 59.69451189 |

|    |             |             |             |
|----|-------------|-------------|-------------|
| O  | 4.72983961  | 34.78957823 | 61.56672146 |
| Zn | 6.32074032  | 35.48394363 | 57.03970643 |
| O  | 6.35468162  | 35.75690768 | 58.90953599 |
| Zn | 7.98672200  | 34.84740618 | 59.54547860 |
| O  | 7.99333859  | 34.79960259 | 61.58205421 |
| Zn | 9.60789937  | 35.77989167 | 56.89650591 |
| O  | 9.65226854  | 35.75393951 | 58.93201718 |
| Zn | 11.31790035 | 34.78450435 | 59.56606619 |
| O  | 11.29289570 | 34.79930616 | 61.60431570 |
| Zn | 12.95315626 | 35.73606229 | 56.91237996 |
| O  | 12.95168127 | 35.76864871 | 58.95897962 |
| Zn | 14.59340724 | 34.80708464 | 59.56990359 |
| O  | 14.60646546 | 34.79531006 | 61.60858497 |
| Zn | 16.24633624 | 35.79256921 | 56.91365424 |
| O  | 16.24633852 | 35.75726386 | 58.96185161 |
| Zn | 17.89926806 | 34.80708336 | 59.56991142 |
| O  | 17.88622120 | 34.79530833 | 61.60859382 |
| Zn | 19.53951329 | 35.73606546 | 56.91239171 |
| O  | 19.54099390 | 35.76864887 | 58.95899162 |
| Zn | 21.17478010 | 34.78450430 | 59.56608284 |
| O  | 21.19979035 | 34.79930005 | 61.60433404 |
| Zn | 22.88477192 | 35.77989193 | 56.89652711 |
| O  | 22.84040956 | 35.75393804 | 58.93203603 |
| Zn | 24.50595640 | 34.84740558 | 59.54551428 |
| O  | 24.49934971 | 34.79959911 | 61.58208456 |
| Zn | 26.17192791 | 35.48395909 | 57.03973622 |
| O  | 26.13800039 | 35.75690968 | 58.90956509 |
| Zn | 27.47612391 | 34.62329408 | 59.69454563 |
| O  | 27.76285129 | 34.78957776 | 61.56675577 |
| Zn | 9.98142608  | 37.51920436 | 59.73281727 |
| O  | 9.65106001  | 37.61914634 | 61.59350831 |
| Zn | 11.25629729 | 38.26311034 | 57.08761807 |
| O  | 11.32853053 | 38.59871343 | 58.94626306 |
| Zn | 12.96088370 | 37.69871298 | 59.57862152 |
| O  | 12.95775282 | 37.64072554 | 61.60513456 |
| Zn | 14.56965017 | 38.65831058 | 56.90457325 |
| O  | 14.60333320 | 38.62995346 | 58.94459796 |
| Zn | 16.24633887 | 37.62974498 | 59.58219744 |
| O  | 16.24634254 | 37.66401930 | 61.61170338 |
| Zn | 17.92301893 | 38.65831142 | 56.90458063 |
| O  | 17.88934193 | 38.62995184 | 58.94460544 |
| Zn | 19.53178404 | 37.69870806 | 59.57863537 |
| O  | 19.53493273 | 37.64072166 | 61.60514262 |
| Zn | 21.23636791 | 38.26311233 | 57.08763265 |
| O  | 21.16413817 | 38.59871516 | 58.94627544 |
| Zn | 22.51125065 | 37.51920895 | 59.73283206 |
| O  | 22.84162586 | 37.61913333 | 61.59352109 |

|    |             |             |             |
|----|-------------|-------------|-------------|
| Zn | 14.84276425 | 40.41045995 | 59.74706670 |
| O  | 14.58483140 | 40.50353145 | 61.61784102 |
| Zn | 16.24632874 | 41.12456698 | 57.07569522 |
| O  | 16.24633265 | 41.45400697 | 58.94679415 |
| Zn | 17.64989768 | 40.41046216 | 59.74706914 |
| O  | 17.90784377 | 40.50352831 | 61.61784033 |
| Zn | 14.84630036 | 15.87403424 | 62.38000955 |
| O  | 14.58738929 | 15.78171101 | 64.25131596 |
| Zn | 16.24635643 | 15.17982071 | 65.01390557 |
| O  | 16.24636158 | 14.84411492 | 66.88765928 |
| Zn | 17.64640683 | 15.87403329 | 62.38000270 |
| O  | 17.90532291 | 15.78170705 | 64.25131110 |
| Zn | 9.98981065  | 18.76173380 | 62.38456411 |
| O  | 9.65811449  | 18.66477743 | 64.24601868 |
| Zn | 11.26093764 | 18.03272369 | 65.03667551 |
| O  | 11.34157183 | 17.69650987 | 66.89811479 |
| Zn | 12.96489321 | 18.58513449 | 62.22571992 |
| O  | 12.96162419 | 18.64417127 | 64.25256313 |
| Zn | 14.56909503 | 17.64612119 | 64.87562739 |
| O  | 14.60940183 | 17.67416759 | 66.90777912 |
| Zn | 16.24635171 | 18.65736246 | 62.22431958 |
| O  | 16.24635478 | 18.62206155 | 64.25337963 |
| Zn | 17.92361429 | 17.64611305 | 64.87562281 |
| O  | 17.88331516 | 17.67416281 | 66.90777619 |
| Zn | 19.52782106 | 18.58512134 | 62.22571178 |
| O  | 19.53108698 | 18.64416163 | 64.25256244 |
| Zn | 21.23177047 | 18.03271696 | 65.03667789 |
| O  | 21.15115017 | 17.69650407 | 66.89811987 |
| Zn | 22.50288720 | 18.76172724 | 62.38456450 |
| O  | 22.83458892 | 18.66476140 | 64.24601792 |
| Zn | 5.02222337  | 21.65817597 | 62.37419819 |
| O  | 4.73094381  | 21.48926654 | 64.24744181 |
| Zn | 6.33191996  | 20.79415065 | 65.04869873 |
| O  | 6.38249638  | 20.52404596 | 66.92087515 |
| Zn | 7.99964243  | 21.43745298 | 62.23090739 |
| O  | 8.00303479  | 21.48651338 | 64.26186884 |
| Zn | 9.62488776  | 20.52035602 | 64.88744527 |
| O  | 9.67450280  | 20.54801338 | 66.91336548 |
| Zn | 11.32922798 | 21.50538201 | 62.22631338 |
| O  | 11.30157248 | 21.48677422 | 64.26094311 |
| Zn | 12.96715640 | 20.56524832 | 64.88036396 |
| O  | 12.96299794 | 20.53252717 | 66.91411448 |
| Zn | 14.59801445 | 21.47841492 | 62.21655476 |
| O  | 14.60960365 | 21.48894200 | 64.25292295 |
| Zn | 16.24635401 | 20.51612289 | 64.86850788 |
| O  | 16.24635897 | 20.54389103 | 66.90503436 |
| Zn | 17.89469332 | 21.47840877 | 62.21655346 |

|    |             |             |             |
|----|-------------|-------------|-------------|
| O  | 17.88310706 | 21.48893699 | 64.25292143 |
| Zn | 19.52555258 | 20.56523927 | 64.88036733 |
| O  | 19.52972145 | 20.53252213 | 66.91411808 |
| Zn | 21.16347364 | 21.50537067 | 62.22632011 |
| O  | 21.19113678 | 21.48676305 | 64.26094690 |
| Zn | 22.86782277 | 20.52033739 | 64.88745499 |
| O  | 22.81821536 | 20.54800256 | 66.91337612 |
| Zn | 24.49306156 | 21.43743940 | 62.23090578 |
| O  | 24.48967578 | 21.48650108 | 64.26187194 |
| Zn | 26.16078734 | 20.79413885 | 65.04870608 |
| O  | 26.11021451 | 20.52403683 | 66.92088262 |
| Zn | 27.47046860 | 21.65816233 | 62.37419320 |
| O  | 27.76175500 | 21.48925486 | 64.24743416 |
| Zn | 4.92972361  | 23.22307085 | 65.04877467 |
| O  | 4.72050505  | 23.40314159 | 66.92082029 |
| Zn | 6.31962545  | 24.34737226 | 62.23127886 |
| O  | 6.36438549  | 24.32495921 | 64.26214973 |
| Zn | 8.04762562  | 23.40438488 | 64.89749159 |
| O  | 8.01352913  | 23.38509079 | 66.92333340 |
| Zn | 9.64378979  | 24.32704077 | 62.21735367 |
| O  | 9.66788188  | 24.34019679 | 64.25506875 |
| Zn | 11.31270906 | 23.38499468 | 64.87779550 |
| O  | 11.31255749 | 23.39951379 | 66.91135661 |
| Zn | 12.95328110 | 24.33740724 | 62.22890537 |
| O  | 12.95555345 | 24.33666555 | 64.26364883 |
| Zn | 14.60365965 | 23.38899500 | 64.87840675 |
| O  | 14.60144060 | 23.39022577 | 66.91242641 |
| Zn | 16.24635341 | 24.33244026 | 62.23281629 |
| O  | 16.24635519 | 24.33980797 | 64.26669037 |
| Zn | 17.88904753 | 23.38899008 | 64.87840984 |
| O  | 17.89127850 | 23.39021936 | 66.91242972 |
| Zn | 19.53942391 | 24.33739806 | 62.22891294 |
| O  | 19.53715543 | 24.33665697 | 64.26365631 |
| Zn | 21.17999677 | 23.38498165 | 64.87780453 |
| O  | 21.18015992 | 23.39950382 | 66.91136525 |
| Zn | 22.84890928 | 24.32702987 | 62.21736451 |
| O  | 22.82482129 | 24.34018879 | 64.25507713 |
| Zn | 24.44507938 | 23.40437813 | 64.89750198 |
| O  | 24.47918239 | 23.38508291 | 66.92334454 |
| Zn | 26.17307706 | 24.34735562 | 62.23127938 |
| O  | 26.12832164 | 24.32494730 | 64.26215503 |
| Zn | 27.56297953 | 23.22304941 | 65.04878397 |
| O  | 27.77219837 | 23.40312433 | 66.92082691 |
| Zn | 4.99828782  | 27.40868980 | 62.38568452 |
| O  | 4.74864661  | 27.16946714 | 64.24706675 |
| Zn | 6.33901938  | 26.21245727 | 64.88812065 |
| O  | 6.38771077  | 26.24224412 | 66.91391165 |

|    |             |             |             |
|----|-------------|-------------|-------------|
| Zn | 8.04337357  | 27.19774260 | 62.22684639 |
| O  | 8.01397889  | 27.18195072 | 64.26144005 |
| Zn | 9.66350322  | 26.24206187 | 64.87796953 |
| O  | 9.67562964  | 26.23551626 | 66.91153663 |
| Zn | 11.30752323 | 27.18850182 | 62.22909262 |
| O  | 11.30865213 | 27.18975144 | 64.26382791 |
| Zn | 12.95406499 | 26.23753736 | 64.88131586 |
| O  | 12.95970596 | 26.24132701 | 66.91492120 |
| Zn | 14.60016780 | 27.18923016 | 62.24049942 |
| O  | 14.60014613 | 27.18850116 | 64.27371399 |
| Zn | 16.24635024 | 26.23903539 | 64.88574272 |
| O  | 16.24635813 | 26.23923059 | 66.91909591 |
| Zn | 17.89253255 | 27.18922656 | 62.24050637 |
| O  | 17.89255696 | 27.18849795 | 64.27372130 |
| Zn | 19.53863700 | 26.23752944 | 64.88132678 |
| O  | 19.53300983 | 26.24132030 | 66.91493147 |
| Zn | 21.18517670 | 27.18849243 | 62.22910961 |
| O  | 21.18405059 | 27.18974442 | 64.26384453 |
| Zn | 22.82920280 | 26.24205474 | 64.87798581 |
| O  | 22.81708685 | 26.23550854 | 66.91155399 |
| Zn | 24.44932445 | 27.19773206 | 62.22686719 |
| O  | 24.47872749 | 27.18194045 | 64.26145867 |
| Zn | 26.15368731 | 26.21244420 | 64.88814226 |
| O  | 26.10500342 | 26.24223434 | 66.91392927 |
| Zn | 27.49440089 | 27.40867862 | 62.38570190 |
| O  | 27.74405889 | 27.16945888 | 64.24708130 |
| Zn | 5.00286520  | 28.87361358 | 65.03753494 |
| O  | 4.75194466  | 29.11184721 | 66.89892846 |
| Zn | 6.33240438  | 30.07433501 | 62.22679413 |
| O  | 6.38253030  | 30.04097719 | 64.25344109 |
| Zn | 8.04906190  | 29.08502003 | 64.88100232 |
| O  | 8.01836100  | 29.09857726 | 66.91460135 |
| Zn | 9.65435697  | 30.04253519 | 62.21705914 |
| O  | 9.66986959  | 30.04620717 | 64.25338865 |
| Zn | 11.31245908 | 29.09072911 | 64.87866006 |
| O  | 11.31202253 | 29.08899666 | 66.91264866 |
| Zn | 12.94967785 | 30.04354538 | 62.23312974 |
| O  | 12.95672970 | 30.03885249 | 64.26699452 |
| Zn | 14.60144672 | 29.08870542 | 64.88586355 |
| O  | 14.60115845 | 29.08946481 | 66.91920746 |
| Zn | 16.24634712 | 30.04106610 | 62.24068606 |
| O  | 16.24634891 | 30.04045893 | 64.27389520 |
| Zn | 17.89124886 | 29.08870241 | 64.88586949 |
| O  | 17.89155402 | 29.08946241 | 66.91921274 |
| Zn | 19.54301605 | 30.04353993 | 62.23314308 |
| O  | 19.53596967 | 30.03884709 | 64.26700820 |
| Zn | 21.18024028 | 29.09072216 | 64.87867772 |

|    |             |             |             |
|----|-------------|-------------|-------------|
| O  | 21.18069128 | 29.08899120 | 66.91266625 |
| Zn | 22.83833685 | 30.04253150 | 62.21708536 |
| O  | 22.82283050 | 30.04620227 | 64.25341295 |
| Zn | 24.44364270 | 29.08501428 | 64.88102371 |
| O  | 24.47434892 | 29.09856845 | 66.91462511 |
| Zn | 26.16029141 | 30.07432844 | 62.22681660 |
| O  | 26.11017166 | 30.04097287 | 64.25346706 |
| Zn | 27.48984409 | 28.87360541 | 65.03755037 |
| O  | 27.74076130 | 29.11183924 | 66.89894592 |
| Zn | 4.92634673  | 33.05968457 | 62.38054350 |
| O  | 4.71705947  | 32.88046476 | 64.25181411 |
| Zn | 6.32255137  | 31.93213878 | 64.87599788 |
| O  | 6.36691797  | 31.95359483 | 66.90804829 |
| Zn | 8.03615372  | 32.88049791 | 62.22471233 |
| O  | 8.00608161  | 32.89742676 | 64.25383324 |
| Zn | 9.64640668  | 31.94999081 | 64.86877823 |
| O  | 9.67029690  | 31.93685120 | 66.90527356 |
| Zn | 11.30274369 | 32.89827625 | 62.21720279 |
| O  | 11.30672010 | 32.88216306 | 64.25349721 |
| Zn | 12.95513183 | 31.93672828 | 64.87876484 |
| O  | 12.95695951 | 31.93888318 | 66.91275201 |
| Zn | 14.60058632 | 32.89351585 | 62.22945468 |
| O  | 14.59947914 | 32.89105455 | 64.26418554 |
| Zn | 16.24634553 | 31.94131707 | 64.88160208 |
| O  | 16.24635315 | 31.93541774 | 66.91519097 |
| Zn | 17.89210137 | 32.89351411 | 62.22946166 |
| O  | 17.89321484 | 32.89104992 | 64.26419244 |
| Zn | 19.53756276 | 31.93672410 | 64.87877808 |
| O  | 19.53574820 | 31.93887802 | 66.91276509 |
| Zn | 21.18994675 | 32.89826972 | 62.21722519 |
| O  | 21.18597695 | 32.88215709 | 64.25351866 |
| Zn | 22.84629526 | 31.94998848 | 64.86880363 |
| O  | 22.82241767 | 31.93684895 | 66.90530074 |
| Zn | 24.45654266 | 32.88049944 | 62.22474263 |
| O  | 24.48662203 | 32.89742567 | 64.25386160 |
| Zn | 26.17015389 | 31.93213596 | 64.87602701 |
| O  | 26.12579351 | 31.95359009 | 66.90807320 |
| Zn | 27.56635019 | 33.05967784 | 62.38057107 |
| O  | 27.77564899 | 32.88046135 | 64.25184211 |
| Zn | 5.02529598  | 34.61815340 | 65.01399572 |
| O  | 4.73439693  | 34.78682790 | 66.88767378 |
| Zn | 6.32621863  | 35.48476826 | 62.38060754 |
| O  | 6.37593488  | 35.75440061 | 64.25202131 |
| Zn | 7.99989778  | 34.83791942 | 64.87586178 |
| O  | 8.00393684  | 34.78955666 | 66.90798853 |
| Zn | 9.61402248  | 35.75949195 | 62.22671516 |
| O  | 9.66746387  | 35.73229425 | 64.25344689 |

|    |             |             |             |
|----|-------------|-------------|-------------|
| Zn | 11.32813916 | 34.76631781 | 64.88104111 |
| O  | 11.30172965 | 34.78698883 | 66.91464909 |
| Zn | 12.96043912 | 35.71601576 | 62.22714490 |
| O  | 12.95879769 | 35.74866688 | 64.26181718 |
| Zn | 14.59716895 | 34.78950010 | 64.87837320 |
| O  | 14.60950785 | 34.78316547 | 66.91193615 |
| Zn | 16.24634261 | 35.76551513 | 62.21835380 |
| O  | 16.24634663 | 35.73746650 | 64.25599841 |
| Zn | 17.89552286 | 34.78949788 | 64.87838049 |
| O  | 17.88319712 | 34.78316334 | 66.91194436 |
| Zn | 19.53224497 | 35.71601284 | 62.22715636 |
| O  | 19.53389427 | 35.74866512 | 64.26182818 |
| Zn | 21.16455775 | 34.76631432 | 64.88105651 |
| O  | 21.19097534 | 34.78698244 | 66.91466635 |
| Zn | 22.87866124 | 35.75948143 | 62.22673256 |
| O  | 22.82523029 | 35.73228852 | 64.25346208 |
| Zn | 24.49279722 | 34.83791615 | 64.87589319 |
| O  | 24.48876879 | 34.78955169 | 66.90801427 |
| Zn | 26.16647038 | 35.48476712 | 62.38063993 |
| O  | 26.11676590 | 35.75440074 | 64.25205250 |
| Zn | 27.46740977 | 34.61815254 | 65.01401988 |
| O  | 27.75831278 | 34.78682114 | 66.88769836 |
| Zn | 9.98818959  | 37.51102009 | 65.03725701 |
| O  | 9.65671648  | 37.60947681 | 66.89873923 |
| Zn | 11.25484118 | 38.24785460 | 62.38575387 |
| O  | 11.33699045 | 38.58340152 | 64.24721560 |
| Zn | 12.96058648 | 37.68387342 | 64.88825296 |
| O  | 12.95974295 | 37.62769162 | 66.91416680 |
| Zn | 14.56647427 | 38.63453623 | 62.23242866 |
| O  | 14.60781016 | 38.60654058 | 64.26328450 |
| Zn | 16.24634773 | 37.60852388 | 64.89865863 |
| O  | 16.24635099 | 37.64834857 | 66.92435588 |
| Zn | 17.92620871 | 38.63453212 | 62.23243440 |
| O  | 17.88488243 | 38.60653589 | 64.26328869 |
| Zn | 19.53209925 | 37.68386701 | 64.88826516 |
| O  | 19.53296001 | 37.62768696 | 66.91417313 |
| Zn | 21.23784200 | 38.24785109 | 62.38576843 |
| O  | 21.15569714 | 38.58339921 | 64.24722673 |
| Zn | 22.50450868 | 37.51102185 | 65.03727029 |
| O  | 22.83598805 | 37.60946311 | 66.89875083 |
| Zn | 14.84380736 | 40.40004368 | 65.05005825 |
| O  | 14.58408785 | 40.49171183 | 66.92216114 |
| Zn | 16.24633829 | 41.10292760 | 62.37576695 |
| O  | 16.24634148 | 41.43909743 | 64.24912158 |
| Zn | 17.64887396 | 40.40004522 | 65.05005927 |
| O  | 17.90860290 | 40.49170892 | 66.92215926 |
| Zn | 14.84523399 | 15.87997729 | 67.69477234 |

|    |             |             |             |
|----|-------------|-------------|-------------|
| O  | 14.58576596 | 15.78869313 | 69.56701485 |
| Zn | 16.24636212 | 15.18364301 | 70.32353210 |
| O  | 16.24636527 | 14.84662988 | 72.19762131 |
| Zn | 17.64749125 | 15.87997719 | 67.69477064 |
| O  | 17.90696052 | 15.78869083 | 69.56701522 |
| Zn | 9.99340884  | 18.76653070 | 67.69217502 |
| O  | 9.66043924  | 18.66968630 | 69.55334979 |
| Zn | 11.26082525 | 18.03625454 | 70.34694542 |
| O  | 11.34203193 | 17.69978458 | 72.20804683 |
| Zn | 12.96449453 | 18.59621184 | 67.53920962 |
| O  | 12.96171449 | 18.65238236 | 69.56555183 |
| Zn | 14.56851848 | 17.65216295 | 70.18841765 |
| O  | 14.60932582 | 17.67878775 | 72.22064813 |
| Zn | 16.24635597 | 18.67157516 | 67.54689250 |
| O  | 16.24635908 | 18.63226616 | 69.57310341 |
| Zn | 17.92419890 | 17.65215606 | 70.18841737 |
| O  | 17.88339599 | 17.67878372 | 72.22064860 |
| Zn | 19.52822685 | 18.59620164 | 67.53921157 |
| O  | 19.53100434 | 18.65237559 | 69.56555919 |
| Zn | 21.23189124 | 18.03624830 | 70.34695192 |
| O  | 21.15069443 | 17.69977964 | 72.20805684 |
| Zn | 22.49930051 | 18.76652508 | 67.69218411 |
| O  | 22.83227534 | 18.66966950 | 69.55335875 |
| Zn | 5.02883801  | 21.66195661 | 67.67470260 |
| O  | 4.73580272  | 21.49210042 | 69.54859666 |
| Zn | 6.33438658  | 20.79598822 | 70.35177174 |
| O  | 6.38475603  | 20.52616589 | 72.22450176 |
| Zn | 8.00642792  | 21.44193350 | 67.53764844 |
| O  | 8.00798202  | 21.49049586 | 69.56953183 |
| Zn | 9.62757205  | 20.52418639 | 70.19617102 |
| O  | 9.67671065  | 20.55059352 | 72.22240368 |
| Zn | 11.33342955 | 21.51419205 | 67.53861173 |
| O  | 11.30522377 | 21.49344151 | 69.57146968 |
| Zn | 12.96886606 | 20.57098131 | 70.19382210 |
| O  | 12.96443291 | 20.53713927 | 72.22654231 |
| Zn | 14.59931522 | 21.49246169 | 67.53185388 |
| O  | 14.61079665 | 21.49783711 | 69.56472899 |
| Zn | 16.24635917 | 20.52465630 | 70.18541568 |
| O  | 16.24636165 | 20.54981313 | 72.21992743 |
| Zn | 17.89340171 | 21.49245721 | 67.53185560 |
| O  | 17.88192284 | 21.49783357 | 69.56472962 |
| Zn | 19.52385318 | 20.57097598 | 70.19382807 |
| O  | 19.52829183 | 20.53713622 | 72.22654804 |
| Zn | 21.15928353 | 21.51418256 | 67.53862113 |
| O  | 21.18749578 | 21.49343188 | 69.57147695 |
| Zn | 22.86514862 | 20.52416813 | 70.19618457 |
| O  | 22.81601304 | 20.55058483 | 72.22241820 |



|    |             |             |             |
|----|-------------|-------------|-------------|
| Zn | 24.48628855 | 21.44192278 | 67.53765577 |
| O  | 24.48473894 | 21.49048612 | 69.56954427 |
| Zn | 26.15832926 | 20.79597710 | 70.35178807 |
| O  | 26.10796054 | 20.52615804 | 72.22451918 |
| Zn | 27.46386981 | 21.66194404 | 67.67471836 |
| O  | 27.75691170 | 21.49208698 | 69.54861031 |
| Zn | 4.93260581  | 23.22437112 | 70.35176739 |
| O  | 4.72346120  | 23.40416406 | 72.22435761 |
| Zn | 6.32718375  | 24.35075093 | 67.53792891 |
| O  | 6.37048383  | 24.32713736 | 69.56971845 |
| Zn | 8.05192392  | 23.40675413 | 70.20562478 |
| O  | 8.01717441  | 23.38715871 | 72.23188879 |
| Zn | 9.65371616  | 24.33251829 | 67.53162946 |
| O  | 9.67480437  | 24.34405374 | 69.56628509 |
| Zn | 11.31834938 | 23.38947093 | 70.19048083 |
| O  | 11.31622000 | 23.40267723 | 72.22266005 |
| Zn | 12.96013335 | 24.34540782 | 67.53488634 |
| O  | 12.95986768 | 24.34181112 | 69.56758966 |
| Zn | 14.60598941 | 23.39617504 | 70.19144054 |
| O  | 14.60287636 | 23.39492077 | 72.22343187 |
| Zn | 16.24635942 | 24.34022442 | 67.53420685 |
| O  | 16.24636019 | 24.34506022 | 69.56705740 |
| Zn | 17.88672971 | 23.39617165 | 70.19144391 |
| O  | 17.88984887 | 23.39491523 | 72.22343533 |
| Zn | 19.53258266 | 24.34540097 | 67.53489398 |
| O  | 19.53285145 | 24.34180419 | 69.56759705 |
| Zn | 21.17436871 | 23.38946026 | 70.19048880 |
| O  | 21.17650366 | 23.40266941 | 72.22266808 |
| Zn | 22.83899593 | 24.33251110 | 67.53164138 |
| O  | 22.81790965 | 24.34404867 | 69.56629451 |
| Zn | 24.44079075 | 23.40675104 | 70.20563942 |
| O  | 24.47554350 | 23.38715425 | 72.23190375 |
| Zn | 26.16552843 | 24.35074104 | 67.53794176 |
| O  | 26.12223359 | 24.32712896 | 69.56973552 |
| Zn | 27.56010872 | 23.22435411 | 70.35178468 |
| O  | 27.76925159 | 23.40415218 | 72.22437338 |
| Zn | 5.00460255  | 27.40922734 | 67.69291602 |
| O  | 4.75429385  | 27.16894015 | 69.55402958 |
| Zn | 6.34386085  | 26.21280222 | 70.19661148 |
| O  | 6.39116303  | 26.24286359 | 72.22272470 |
| Zn | 8.05351887  | 27.19668567 | 67.53899690 |
| O  | 8.02181736  | 27.18165085 | 69.57180948 |
| Zn | 9.67036919  | 26.24454015 | 70.19056967 |
| O  | 9.68030077  | 26.23701557 | 72.22275203 |
| Zn | 11.31816262 | 27.19013146 | 67.53500329 |
| O  | 11.31543478 | 27.19074990 | 69.56769217 |
| Zn | 12.95910085 | 26.24031693 | 70.19150512 |

|    |             |             |             |
|----|-------------|-------------|-------------|
| O  | 12.96289123 | 26.24309854 | 72.22356108 |
| Zn | 14.60341695 | 27.19090960 | 67.53736348 |
| O  | 14.60237015 | 27.18967983 | 69.57030191 |
| Zn | 16.24635732 | 26.24213678 | 70.19293047 |
| O  | 16.24636167 | 26.24126768 | 72.22543313 |
| Zn | 17.88929801 | 27.19090659 | 67.53736876 |
| O  | 17.89034479 | 27.18967736 | 69.57030775 |
| Zn | 19.53361492 | 26.24031063 | 70.19151410 |
| O  | 19.52983131 | 26.24309312 | 72.22356932 |
| Zn | 21.17455089 | 27.19012417 | 67.53501715 |
| O  | 21.17727994 | 27.19074432 | 69.56770561 |
| Zn | 22.82234998 | 26.24453571 | 70.19058410 |
| O  | 22.81242277 | 26.23701033 | 72.22276761 |
| Zn | 24.43919361 | 27.19667979 | 67.53901702 |
| O  | 24.47090209 | 27.18164284 | 69.57182752 |
| Zn | 26.14885934 | 26.21279411 | 70.19663618 |
| O  | 26.10155904 | 26.24285760 | 72.22274449 |
| Zn | 27.48810456 | 27.40922184 | 67.69293705 |
| O  | 27.73842655 | 27.16893540 | 69.55404756 |
| Zn | 5.00608087  | 28.87170540 | 70.34735574 |
| O  | 4.75513264  | 29.11062187 | 72.20840345 |
| Zn | 6.34216877  | 30.06822235 | 67.53981625 |
| O  | 6.38994367  | 30.03684204 | 69.56598299 |
| Zn | 8.05509385  | 29.08355004 | 70.19415637 |
| O  | 8.02318211  | 29.09748844 | 72.22673366 |
| Zn | 9.66752393  | 30.03639705 | 67.53210758 |
| O  | 9.67840483  | 30.04268851 | 69.56493602 |
| Zn | 11.32000604 | 29.08902390 | 70.19151908 |
| O  | 11.31689461 | 29.08783366 | 72.22348340 |
| Zn | 12.95669567 | 30.03944039 | 67.53435721 |
| O  | 12.96143930 | 30.03612531 | 69.56719632 |
| Zn | 14.60424570 | 29.08703139 | 70.19296308 |
| O  | 14.60297993 | 29.08839182 | 72.22545978 |
| Zn | 16.24635509 | 30.03723367 | 67.53745762 |
| O  | 16.24635561 | 30.03786268 | 69.57039405 |
| Zn | 17.88846514 | 29.08702884 | 70.19296785 |
| O  | 17.88974038 | 29.08838982 | 72.22546382 |
| Zn | 19.53601410 | 30.03943504 | 67.53436785 |
| O  | 19.53127324 | 30.03612028 | 69.56720731 |
| Zn | 21.17270794 | 29.08901791 | 70.19153350 |
| O  | 21.17582706 | 29.08782925 | 72.22349764 |
| Zn | 22.82518511 | 30.03639381 | 67.53212838 |
| O  | 22.81430814 | 30.04268386 | 69.56495533 |
| Zn | 24.43762406 | 29.08354682 | 70.19417496 |
| O  | 24.46953596 | 29.09748209 | 72.22675407 |
| Zn | 26.15054185 | 30.06821576 | 67.53983215 |
| O  | 26.10277153 | 30.03683777 | 69.56600389 |

|    |             |             |             |
|----|-------------|-------------|-------------|
| Zn | 27.48664096 | 28.87170179 | 70.34737326 |
| O  | 27.73758204 | 29.11061775 | 72.20842359 |
| Zn | 4.93133729  | 33.05556311 | 67.69447679 |
| O  | 4.72255935  | 32.87547337 | 69.56669320 |
| Zn | 6.32769859  | 31.92855351 | 70.18818664 |
| O  | 6.37098421  | 31.95121782 | 72.22035001 |
| Zn | 8.04886430  | 32.87321465 | 67.54675219 |
| O  | 8.01517028  | 32.89224258 | 69.57303531 |
| Zn | 9.65399130  | 31.94565695 | 70.18529567 |
| O  | 9.67551750  | 31.93388352 | 72.21978924 |
| Zn | 11.31459425 | 32.89000065 | 67.53213987 |
| O  | 11.31403601 | 32.87663507 | 69.56494946 |
| Zn | 12.96033663 | 31.93105488 | 70.19152776 |
| O  | 12.96038576 | 31.93527821 | 72.22349861 |
| Zn | 14.60435476 | 32.88345459 | 67.53518293 |
| O  | 14.60193522 | 32.88470198 | 69.56787513 |
| Zn | 16.24635333 | 31.93550595 | 70.19161164 |
| O  | 16.24635739 | 31.93176583 | 72.22365958 |
| Zn | 17.88834966 | 32.88345242 | 67.53518921 |
| O  | 17.89077298 | 32.88469710 | 69.56788104 |
| Zn | 19.53237344 | 31.93105074 | 70.19153900 |
| O  | 19.53233074 | 31.93527333 | 72.22350949 |
| Zn | 21.17811306 | 32.88999317 | 67.53215863 |
| O  | 21.17867466 | 32.87662923 | 69.56496770 |
| Zn | 22.83872473 | 31.94565429 | 70.18531685 |
| O  | 22.81720550 | 31.93388174 | 72.21981242 |
| Zn | 24.44384915 | 32.87321544 | 67.54677720 |
| O  | 24.47754702 | 32.89224090 | 69.57305949 |
| Zn | 26.16501928 | 31.92854990 | 70.18821267 |
| O  | 26.12173579 | 31.95121340 | 72.22037167 |
| Zn | 27.56137675 | 33.05555292 | 67.69450032 |
| O  | 27.77016235 | 32.87546642 | 69.56671753 |
| Zn | 5.02876616  | 34.61614613 | 70.32286698 |
| O  | 4.73667127  | 34.78551272 | 72.19686892 |
| Zn | 6.33212883  | 35.48245042 | 67.69448330 |
| O  | 6.38295642  | 35.75214299 | 69.56683538 |
| Zn | 8.00557861  | 34.83536260 | 70.18799156 |
| O  | 8.00803265  | 34.78733372 | 72.22023924 |
| Zn | 9.62413978  | 35.75419611 | 67.53954780 |
| O  | 9.67471599  | 35.72807475 | 69.56582390 |
| Zn | 11.33239646 | 34.76196002 | 70.19403257 |
| O  | 11.30507030 | 34.78345572 | 72.22663130 |
| Zn | 12.96628314 | 35.70787886 | 67.53899785 |
| O  | 12.96292671 | 35.74213847 | 69.57191842 |
| Zn | 14.59838278 | 34.78235716 | 70.19070184 |
| O  | 14.61049352 | 34.77843116 | 72.22290256 |
| Zn | 16.24635139 | 35.75422558 | 67.53223871 |

|    |             |             |             |
|----|-------------|-------------|-------------|
| O  | 16.24635433 | 35.72959938 | 69.56686001 |
| Zn | 17.89432550 | 34.78235447 | 70.19070848 |
| O  | 17.88222142 | 34.77842896 | 72.22291013 |
| Zn | 19.52641930 | 35.70787594 | 67.53900858 |
| O  | 19.52978043 | 35.74213697 | 69.57192879 |
| Zn | 21.16031673 | 34.76195644 | 70.19404600 |
| O  | 21.18764518 | 34.78344981 | 72.22664636 |
| Zn | 22.86856281 | 35.75418413 | 67.53956272 |
| O  | 22.81799347 | 35.72806914 | 69.56583765 |
| Zn | 24.48713139 | 34.83535871 | 70.18801891 |
| O  | 24.48468267 | 34.78732922 | 72.22026107 |
| Zn | 26.16058060 | 35.48244515 | 67.69450905 |
| O  | 26.10976043 | 35.75213910 | 69.56686006 |
| Zn | 27.46395396 | 34.61614224 | 70.32288938 |
| O  | 27.75604830 | 34.78550441 | 72.19689189 |
| Zn | 9.99144371  | 37.50931688 | 70.34693082 |
| O  | 9.65939843  | 37.60744090 | 72.20806760 |
| Zn | 11.25746267 | 38.24221929 | 67.69274988 |
| O  | 11.34022684 | 38.57888146 | 69.55393087 |
| Zn | 12.96267929 | 37.67960874 | 70.19648231 |
| O  | 12.96092568 | 37.62450403 | 72.22272914 |
| Zn | 14.56720657 | 38.62642419 | 67.53866691 |
| O  | 14.60890114 | 38.60028581 | 69.57047234 |
| Zn | 16.24635659 | 37.60368462 | 70.20640544 |
| O  | 16.24635725 | 37.64421926 | 72.23254095 |
| Zn | 17.92549411 | 38.62641963 | 67.53867171 |
| O  | 17.88380681 | 38.60028191 | 69.57047644 |
| Zn | 19.53002170 | 37.67960235 | 70.19649385 |
| O  | 19.53178824 | 37.62449977 | 72.22273455 |
| Zn | 21.23523945 | 38.24221655 | 67.69276337 |
| O  | 21.15247601 | 38.57887946 | 69.55394086 |
| Zn | 22.50127042 | 37.50931863 | 70.34694328 |
| O  | 22.83331790 | 37.60742809 | 72.20807892 |
| Zn | 14.84416550 | 40.39700648 | 70.35268477 |
| O  | 14.58475358 | 40.48872734 | 72.22533952 |
| Zn | 16.24634651 | 41.09533643 | 67.67583557 |
| O  | 16.24634858 | 41.43353151 | 69.54983730 |
| Zn | 17.64853072 | 40.39700803 | 70.35268625 |
| O  | 17.90795013 | 40.48872542 | 72.22533816 |
| Zn | 14.84427428 | 15.88175951 | 73.00243879 |
| O  | 14.58503350 | 15.79039527 | 74.87517528 |
| Zn | 16.24636370 | 15.18227045 | 75.62736202 |
| O  | 16.24636483 | 14.84446719 | 77.50169829 |
| Zn | 17.64845726 | 15.88175918 | 73.00243885 |
| O  | 17.90769698 | 15.79039272 | 74.87517750 |
| Zn | 9.99254261  | 18.76849430 | 73.00148416 |
| O  | 9.65980644  | 18.67091002 | 74.86255380 |

|    |             |             |             |
|----|-------------|-------------|-------------|
| Zn | 11.25984420 | 18.03586073 | 75.65538629 |
| O  | 11.34065668 | 17.69935482 | 77.51673419 |
| Zn | 12.96404854 | 18.59949231 | 72.85011100 |
| O  | 12.96095812 | 18.65460316 | 74.87646716 |
| Zn | 14.56847968 | 17.65328832 | 75.49608846 |
| O  | 14.60872782 | 17.67886870 | 77.52874568 |
| Zn | 16.24635751 | 18.67517406 | 72.85807060 |
| O  | 16.24636008 | 18.63527889 | 74.88442885 |
| Zn | 17.92424067 | 17.65328130 | 75.49608901 |
| O  | 17.88399347 | 17.67886395 | 77.52874731 |
| Zn | 19.52867742 | 18.59948372 | 72.85011423 |
| O  | 19.53176263 | 18.65459780 | 74.87647632 |
| Zn | 21.23287418 | 18.03585530 | 75.65539281 |
| O  | 21.15206886 | 17.69934972 | 77.51674444 |
| Zn | 22.50017204 | 18.76849092 | 73.00149535 |
| O  | 22.83291147 | 18.67089440 | 74.86256547 |
| Zn | 5.02896535  | 21.66213593 | 72.97774360 |
| O  | 4.73590364  | 21.49226805 | 74.85175376 |
| Zn | 6.33292161  | 20.79502874 | 75.65620910 |
| O  | 6.38277537  | 20.52550371 | 77.52922949 |
| Zn | 8.00679264  | 21.44325916 | 72.84442407 |
| O  | 8.00787336  | 21.49086834 | 74.87694145 |
| Zn | 9.62673810  | 20.52512259 | 75.50524616 |
| O  | 9.67546005  | 20.55054556 | 77.53198339 |
| Zn | 11.33354204 | 21.51670011 | 72.85039615 |
| O  | 11.30523430 | 21.49532395 | 74.88299059 |
| Zn | 12.96841439 | 20.57224578 | 75.50558468 |
| O  | 12.96393725 | 20.53783920 | 77.53860382 |
| Zn | 14.59906704 | 21.49698310 | 72.84626770 |
| O  | 14.61056433 | 21.50092923 | 74.87839077 |
| Zn | 16.24636055 | 20.52660623 | 75.49763390 |
| O  | 16.24636093 | 20.55070287 | 77.53239950 |
| Zn | 17.89365367 | 21.49697950 | 72.84626975 |
| O  | 17.88215673 | 21.50092655 | 74.87839168 |
| Zn | 19.52430723 | 20.57224179 | 75.50559072 |
| O  | 19.52878584 | 20.53783631 | 77.53861032 |
| Zn | 21.15917535 | 21.51669308 | 72.85040577 |
| O  | 21.18748662 | 21.49531609 | 74.88299862 |
| Zn | 22.86598489 | 20.52510576 | 75.50526013 |
| O  | 22.81726238 | 20.55053713 | 77.53199851 |
| Zn | 24.48592859 | 21.44325134 | 72.84443404 |
| O  | 24.48484920 | 21.49086122 | 74.87695684 |
| Zn | 26.15979700 | 20.79501924 | 75.65622423 |
| O  | 26.10994075 | 20.52549607 | 77.52924602 |
| Zn | 27.46374926 | 21.66212750 | 72.97776284 |
| O  | 27.75681567 | 21.49225650 | 74.85177188 |
| Zn | 4.93100056  | 23.22377377 | 75.65614315 |

|    |             |             |             |
|----|-------------|-------------|-------------|
| O  | 4.72181210  | 23.40296387 | 77.52902296 |
| Zn | 6.32856100  | 24.35045281 | 72.84459377 |
| O  | 6.37076420  | 24.32692213 | 74.87702331 |
| Zn | 8.05152160  | 23.40655400 | 75.51364017 |
| O  | 8.01672800  | 23.38695135 | 77.54044105 |
| Zn | 9.65548453  | 24.33350375 | 72.84284962 |
| O  | 9.67580134  | 24.34463622 | 74.87730908 |
| Zn | 11.31860088 | 23.39049219 | 75.50341707 |
| O  | 11.31610682 | 23.40312230 | 77.53577615 |
| Zn | 12.96161972 | 24.34826251 | 72.84953682 |
| O  | 12.96081721 | 24.34368399 | 74.88118279 |
| Zn | 14.60616720 | 23.39791607 | 75.50747328 |
| O  | 14.60276212 | 23.39581469 | 77.53948169 |
| Zn | 16.24636162 | 24.34407329 | 72.84936975 |
| O  | 16.24636104 | 24.34733591 | 74.88114588 |
| Zn | 17.88655518 | 23.39791366 | 75.50747620 |
| O  | 17.88996086 | 23.39580950 | 77.53948482 |
| Zn | 19.53110112 | 24.34825706 | 72.84954301 |
| O  | 19.53190373 | 24.34367846 | 74.88118911 |
| Zn | 21.17411981 | 23.39048337 | 75.50342441 |
| O  | 21.17661459 | 23.40311487 | 77.53578374 |
| Zn | 22.83723239 | 24.33349913 | 72.84286093 |
| O  | 22.81691405 | 24.34463311 | 74.87731831 |
| Zn | 24.44119506 | 23.40655324 | 75.51365440 |
| O  | 24.47598799 | 23.38694790 | 77.54045624 |
| Zn | 26.16415678 | 24.35044682 | 72.84460865 |
| O  | 26.12195507 | 24.32691562 | 74.87704269 |
| Zn | 27.56171650 | 23.22375938 | 75.65616194 |
| O  | 27.77090033 | 23.40295381 | 77.52904105 |
| Zn | 5.00596304  | 27.40756075 | 73.00186880 |
| O  | 4.75509592  | 27.16786513 | 74.86288290 |
| Zn | 6.34427973  | 26.21171768 | 75.50544627 |
| O  | 6.39049524  | 26.24189768 | 77.53206514 |
| Zn | 8.05585059  | 27.19552930 | 72.85055575 |
| O  | 8.02350396  | 27.18077387 | 74.88311456 |
| Zn | 9.67138058  | 26.24429010 | 75.50339932 |
| O  | 9.68060653  | 26.23676189 | 77.53576611 |
| Zn | 11.32143797 | 27.18996217 | 72.84956348 |
| O  | 11.31754963 | 27.19065982 | 74.88119486 |
| Zn | 12.96017950 | 26.24095692 | 75.50828873 |
| O  | 12.96301084 | 26.24320690 | 77.54038445 |
| Zn | 14.60498580 | 27.19179631 | 72.85125548 |
| O  | 14.60327382 | 27.19021430 | 74.88348351 |
| Zn | 16.24635940 | 26.24311189 | 75.51062257 |
| O  | 16.24636076 | 26.24162387 | 77.54322020 |
| Zn | 17.88773447 | 27.19179385 | 72.85125982 |
| O  | 17.88944370 | 27.19021230 | 74.88348847 |

|    |             |             |             |
|----|-------------|-------------|-------------|
| Zn | 19.53254016 | 26.24095188 | 75.50829645 |
| O  | 19.52970997 | 26.24320182 | 77.54039151 |
| Zn | 21.17128096 | 27.18995621 | 72.84957475 |
| O  | 21.17516726 | 27.19065551 | 74.88120600 |
| Zn | 22.82134154 | 26.24428753 | 75.50341193 |
| O  | 22.81211499 | 26.23675714 | 77.53577990 |
| Zn | 24.43686768 | 27.19552639 | 72.85057403 |
| O  | 24.46921779 | 27.18076781 | 74.88313114 |
| Zn | 26.14844326 | 26.21171154 | 75.50547060 |
| O  | 26.10222537 | 26.24189239 | 77.53208444 |
| Zn | 27.48675195 | 27.40755848 | 73.00189206 |
| O  | 27.73762844 | 27.16786156 | 74.86290320 |
| Zn | 5.00528366  | 28.87116246 | 75.65540002 |
| O  | 4.75406051  | 29.10974401 | 77.51669661 |
| Zn | 6.34488100  | 30.06623968 | 72.85028111 |
| O  | 6.39153197  | 30.03515099 | 74.87648587 |
| Zn | 8.05598480  | 29.08260721 | 75.50560429 |
| O  | 8.02351526  | 29.09680429 | 77.53848785 |
| Zn | 9.67139166  | 30.03393849 | 72.84622413 |
| O  | 9.68100383  | 30.04100165 | 74.87830912 |
| Zn | 11.32159918 | 29.08836137 | 75.50735612 |
| O  | 11.31757264 | 29.08736874 | 77.53934072 |
| Zn | 12.96007704 | 30.03752189 | 72.84933735 |
| O  | 12.96342261 | 30.03502987 | 74.88110433 |
| Zn | 14.60507346 | 29.08658996 | 75.51056132 |
| O  | 14.60324774 | 29.08828414 | 77.54315438 |
| Zn | 16.24635818 | 30.03544321 | 72.85125976 |
| O  | 16.24635738 | 30.03685606 | 74.88348591 |
| Zn | 17.88764253 | 29.08658789 | 75.51056525 |
| O  | 17.88947112 | 29.08828220 | 77.54315764 |
| Zn | 19.53263933 | 30.03751701 | 72.84934597 |
| O  | 19.52929336 | 30.03502545 | 74.88111343 |
| Zn | 21.17111911 | 29.08835629 | 75.50736833 |
| O  | 21.17514732 | 29.08736456 | 77.53935288 |
| Zn | 22.82132394 | 30.03393616 | 72.84624163 |
| O  | 22.81171230 | 30.04099764 | 74.87832529 |
| Zn | 24.43673595 | 29.08260529 | 75.50562139 |
| O  | 24.46920111 | 29.09679837 | 77.53850696 |
| Zn | 26.14783578 | 30.06623491 | 72.85029658 |
| O  | 26.10118624 | 30.03514690 | 74.87650632 |
| Zn | 27.48744036 | 28.87116022 | 75.65541911 |
| O  | 27.73865314 | 29.10974037 | 77.51671881 |
| Zn | 4.93247991  | 33.05383873 | 73.00152730 |
| O  | 4.72370400  | 32.87405435 | 74.87424210 |
| Zn | 6.32865856  | 31.92805062 | 75.49537248 |
| O  | 6.37070211  | 31.95077567 | 77.52797973 |
| Zn | 8.05204501  | 32.87145867 | 72.85741214 |

|    |             |             |             |
|----|-------------|-------------|-------------|
| O  | 8.01780141  | 32.89080242 | 74.88386765 |
| Zn | 9.65566606  | 31.94476484 | 75.49713899 |
| O  | 9.67621824  | 31.93353562 | 77.53190156 |
| Zn | 11.31868891 | 32.88799332 | 72.84617866 |
| O  | 11.31684199 | 32.87534780 | 74.87825082 |
| Zn | 12.96174125 | 31.93009841 | 75.50728223 |
| O  | 12.96116406 | 31.93500698 | 77.53927536 |
| Zn | 14.60612913 | 32.88077359 | 72.84956249 |
| O  | 14.60308882 | 32.88299618 | 74.88120562 |
| Zn | 16.24635627 | 31.93431490 | 75.50821247 |
| O  | 16.24635679 | 31.93167964 | 77.54030285 |
| Zn | 17.88658283 | 32.88077142 | 72.84956774 |
| O  | 17.88962368 | 32.88299137 | 74.88121052 |
| Zn | 19.53097428 | 31.93009481 | 75.50729162 |
| O  | 19.53155091 | 31.93500236 | 77.53928449 |
| Zn | 21.17402604 | 32.88798627 | 72.84619450 |
| O  | 21.17587292 | 32.87534236 | 74.87826638 |
| Zn | 22.83705426 | 31.94476239 | 75.49715710 |
| O  | 22.81650281 | 31.93353329 | 77.53192135 |
| Zn | 24.44067602 | 32.87146004 | 72.85743340 |
| O  | 24.47491997 | 32.89080082 | 74.88388856 |
| Zn | 26.16406272 | 31.92804694 | 75.49539748 |
| O  | 26.12201631 | 31.95076997 | 77.52800020 |
| Zn | 27.56024209 | 33.05382793 | 73.00155098 |
| O  | 27.76902167 | 32.87404663 | 74.87426654 |
| Zn | 5.02755321  | 34.61688584 | 75.62615067 |
| O  | 4.73475032  | 34.78664088 | 77.50039367 |
| Zn | 6.33416720  | 35.48236724 | 73.00151883 |
| O  | 6.38477127  | 35.75193284 | 74.87436403 |
| Zn | 8.00653758  | 34.83490177 | 75.49515807 |
| O  | 8.00829986  | 34.78789630 | 77.52785371 |
| Zn | 9.62722411  | 35.75296368 | 72.84991515 |
| O  | 9.67699600  | 35.72767376 | 74.87623099 |
| Zn | 11.33368208 | 34.76178967 | 75.50537106 |
| O  | 11.30584337 | 34.78360563 | 77.53827951 |
| Zn | 12.96844132 | 35.70655508 | 72.85035217 |
| O  | 12.96454771 | 35.74122962 | 74.88302999 |
| Zn | 14.59912596 | 34.78169504 | 75.50330210 |
| O  | 14.61088929 | 34.77837444 | 77.53569028 |
| Zn | 16.24635592 | 35.75227323 | 72.84313270 |
| O  | 16.24635660 | 35.72852001 | 74.87757327 |
| Zn | 17.89358815 | 34.78169243 | 75.50330763 |
| O  | 17.88182406 | 34.77837232 | 77.53569665 |
| Zn | 19.52427051 | 35.70655247 | 72.85036137 |
| O  | 19.52816441 | 35.74122839 | 74.88303891 |
| Zn | 21.15903639 | 34.76178598 | 75.50538260 |
| O  | 21.18687093 | 34.78359932 | 77.53829245 |



|    |             |             |             |
|----|-------------|-------------|-------------|
| Zn | 22.86548808 | 35.75295133 | 72.84992834 |
| O  | 22.81571817 | 35.72766860 | 74.87624298 |
| Zn | 24.48617647 | 34.83489723 | 75.49518285 |
| O  | 24.48441295 | 34.78789074 | 77.52787279 |
| Zn | 26.15855176 | 35.48236083 | 73.00154289 |
| O  | 26.10795054 | 35.75192725 | 74.87438684 |
| Zn | 27.46516975 | 34.61688026 | 75.62617493 |
| O  | 27.75796653 | 34.78663077 | 77.50041907 |
| Zn | 9.99156737  | 37.51040696 | 75.65487861 |
| O  | 9.65965899  | 37.60890058 | 77.51626021 |
| Zn | 11.25961819 | 38.24199154 | 73.00154540 |
| O  | 11.34158544 | 38.57884190 | 74.86262425 |
| Zn | 12.96386453 | 37.67989900 | 75.50512068 |
| O  | 12.96144018 | 37.62566223 | 77.53187940 |
| Zn | 14.56817769 | 38.62548393 | 72.84502040 |
| O  | 14.60924927 | 38.60024772 | 74.87747812 |
| Zn | 16.24635940 | 37.60421788 | 75.51406993 |
| O  | 16.24635698 | 37.64477832 | 77.54075106 |
| Zn | 17.92453425 | 38.62547934 | 72.84502565 |
| O  | 17.88346401 | 38.60024435 | 74.87748239 |
| Zn | 19.52884206 | 37.67989258 | 75.50513154 |
| O  | 19.53127295 | 37.62565764 | 77.53188393 |
| Zn | 21.23309535 | 38.24198922 | 73.00155833 |
| O  | 21.15112304 | 38.57883969 | 74.86263347 |
| Zn | 22.50115099 | 37.51040808 | 75.65489177 |
| O  | 22.83305662 | 37.60888702 | 77.51627281 |
| Zn | 14.84397792 | 40.39880987 | 75.65671735 |
| O  | 14.58506202 | 40.49083601 | 77.52966679 |
| Zn | 16.24635306 | 41.09519437 | 72.97849283 |
| O  | 16.24635226 | 41.43343681 | 74.85261200 |
| Zn | 17.64872409 | 40.39881095 | 75.65672152 |
| O  | 17.90764223 | 40.49083359 | 77.52966868 |
| Zn | 14.84251977 | 15.87875156 | 78.30353574 |
| O  | 14.58356402 | 15.78546412 | 80.17691702 |
| Zn | 16.24636039 | 15.17190218 | 80.92099646 |
| O  | 16.24635900 | 14.82953747 | 82.79528987 |
| Zn | 17.65021009 | 15.87875101 | 78.30353685 |
| O  | 17.90916064 | 15.78545984 | 80.17692099 |
| Zn | 9.98918391  | 18.76691775 | 78.30821896 |
| O  | 9.65709941  | 18.66826800 | 80.17006631 |
| Zn | 11.25812456 | 18.02885427 | 80.95771869 |
| O  | 11.33501112 | 17.69207505 | 82.82088002 |
| Zn | 12.96299993 | 18.59869854 | 78.15740503 |
| O  | 12.95986436 | 18.65135401 | 80.18482946 |
| Zn | 14.56874854 | 17.64773814 | 80.79774610 |
| O  | 14.60729138 | 17.66809834 | 82.83198578 |
| Zn | 16.24635725 | 18.67398906 | 78.16510206 |

|    |             |             |             |
|----|-------------|-------------|-------------|
| O  | 16.24635845 | 18.63232996 | 80.19236403 |
| Zn | 17.92396807 | 17.64772901 | 80.79774783 |
| O  | 17.88542184 | 17.66809179 | 82.83198804 |
| Zn | 19.52972576 | 18.59868993 | 78.15740795 |
| O  | 19.53285325 | 18.65134669 | 80.18483901 |
| Zn | 21.23459077 | 18.02884713 | 80.95772417 |
| O  | 21.15770843 | 17.69206757 | 82.82088943 |
| Zn | 22.50353066 | 18.76691485 | 78.30822954 |
| O  | 22.83561616 | 18.66825034 | 80.17007791 |
| Zn | 5.02426492  | 21.65955923 | 78.28060402 |
| O  | 4.73031128  | 21.48916983 | 80.15467170 |
| Zn | 6.32684275  | 20.78989530 | 80.95769768 |
| O  | 6.37302670  | 20.51942614 | 82.83163954 |
| Zn | 8.00372621  | 21.44251162 | 78.15051901 |
| O  | 8.00325055  | 21.48843971 | 80.18379419 |
| Zn | 9.62266351  | 20.52308081 | 80.80998644 |
| O  | 9.66650059  | 20.54754998 | 82.83851767 |
| Zn | 11.33187172 | 21.51619529 | 78.16105758 |
| O  | 11.30300778 | 21.49386388 | 80.19482936 |
| Zn | 12.96594414 | 20.56861521 | 80.81400256 |
| O  | 12.95934865 | 20.53111262 | 82.84978825 |
| Zn | 14.59873897 | 21.49637927 | 78.15935767 |
| O  | 14.61000630 | 21.49824003 | 80.19292524 |
| Zn | 16.24635852 | 20.52226155 | 80.80851929 |
| O  | 16.24635725 | 20.54089845 | 82.84681873 |
| Zn | 17.89397979 | 21.49637600 | 78.15935933 |
| O  | 17.88271177 | 21.49823695 | 80.19292631 |
| Zn | 19.52677364 | 20.56861014 | 80.81400722 |
| O  | 19.53336755 | 20.53110795 | 82.84979399 |
| Zn | 21.16084418 | 21.51618859 | 78.16106686 |
| O  | 21.18971045 | 21.49385442 | 80.19483733 |
| Zn | 22.87005719 | 20.52306126 | 80.81000033 |
| O  | 22.82621700 | 20.54753875 | 82.83853270 |
| Zn | 24.48899489 | 21.44250339 | 78.15052719 |
| O  | 24.48946944 | 21.48843065 | 80.18380835 |
| Zn | 26.16587360 | 20.78988493 | 80.95771055 |
| O  | 26.11968541 | 20.51941735 | 82.83165389 |
| Zn | 27.46844898 | 21.65955112 | 78.28062217 |
| O  | 27.76240652 | 21.48915660 | 80.15468885 |
| Zn | 4.92341726  | 23.22131496 | 80.95754296 |
| O  | 4.71149152  | 23.39780719 | 82.83133344 |
| Zn | 6.32634164  | 24.34830523 | 78.15057550 |
| O  | 6.36628910  | 24.32427104 | 80.18375670 |
| Zn | 8.04633384  | 23.40366589 | 80.82064030 |
| O  | 8.00883111  | 23.38255069 | 82.84933682 |
| Zn | 9.65391086  | 24.33265688 | 78.15443049 |
| O  | 9.67258539  | 24.34285633 | 80.19012017 |

|    |             |             |             |
|----|-------------|-------------|-------------|
| Zn | 11.31419198 | 23.38822581 | 80.81741391 |
| O  | 11.30773428 | 23.39820982 | 82.85354656 |
| Zn | 12.96049870 | 24.34762396 | 78.16592887 |
| O  | 12.95870479 | 24.34171168 | 80.19930668 |
| Zn | 14.60439153 | 23.39445842 | 80.82285236 |
| O  | 14.59934299 | 23.38880838 | 82.85920888 |
| Zn | 16.24636021 | 24.34350969 | 78.16689177 |
| O  | 16.24635909 | 24.34482851 | 80.20046389 |
| Zn | 17.88832607 | 23.39445618 | 80.82285480 |
| O  | 17.89337200 | 23.38880254 | 82.85921176 |
| Zn | 19.53221952 | 24.34761923 | 78.16593446 |
| O  | 19.53401249 | 24.34170548 | 80.19931257 |
| Zn | 21.17852412 | 23.38821544 | 80.81741981 |
| O  | 21.18497985 | 23.39820022 | 82.85355329 |
| Zn | 22.83880372 | 24.33265272 | 78.15444030 |
| O  | 22.82012592 | 24.34285222 | 80.19012851 |
| Zn | 24.44637804 | 23.40366341 | 80.82065177 |
| O  | 24.48387809 | 23.38254565 | 82.84934995 |
| Zn | 26.16637355 | 24.34829966 | 78.15058897 |
| O  | 26.12642609 | 24.32426327 | 80.18377529 |
| Zn | 27.56929680 | 23.22129959 | 80.95755997 |
| O  | 27.78121566 | 23.39779778 | 82.83134965 |
| Zn | 5.00288144  | 27.40554800 | 78.30823863 |
| O  | 4.75139196  | 27.16697255 | 80.17003545 |
| Zn | 6.34038902  | 26.20937554 | 80.80994924 |
| O  | 6.38325413  | 26.23579974 | 82.83835342 |
| Zn | 8.05455143  | 27.19445674 | 78.16099992 |
| O  | 8.02106062  | 27.17972208 | 80.19474037 |
| Zn | 9.66713069  | 26.24175699 | 80.81725979 |
| O  | 9.67203413  | 26.23217244 | 82.85338639 |
| Zn | 11.32028229 | 27.18941455 | 78.16584616 |
| O  | 11.31472799 | 27.18993170 | 80.19920854 |
| Zn | 12.95694011 | 26.23918023 | 80.82511444 |
| O  | 12.95643514 | 26.23954340 | 82.86178713 |
| Zn | 14.60445025 | 27.19155058 | 78.16975564 |
| O  | 14.60187613 | 27.18947008 | 80.20385023 |
| Zn | 16.24635707 | 26.24134398 | 80.82668163 |
| O  | 16.24635657 | 26.23808869 | 82.86366079 |
| Zn | 17.88826790 | 27.19154824 | 78.16975932 |
| O  | 17.89083774 | 27.18946770 | 80.20385465 |
| Zn | 19.53577500 | 26.23917464 | 80.82512137 |
| O  | 19.53627715 | 26.23953741 | 82.86179385 |
| Zn | 21.17243445 | 27.18940902 | 78.16585616 |
| O  | 21.17798511 | 27.18992673 | 80.19921879 |
| Zn | 22.82558687 | 26.24175379 | 80.81727136 |
| O  | 22.82067930 | 26.23216603 | 82.85339950 |
| Zn | 24.43816468 | 27.19445389 | 78.16101688 |

|    |             |             |             |
|----|-------------|-------------|-------------|
| O  | 24.47165674 | 27.17971487 | 80.19475530 |
| Zn | 26.15233025 | 26.20936789 | 80.80997265 |
| O  | 26.10945868 | 26.23579371 | 82.83837143 |
| Zn | 27.48983132 | 27.40554559 | 78.30826251 |
| O  | 27.74132831 | 27.16696806 | 80.17005638 |
| Zn | 4.99825228  | 28.87337544 | 80.95723696 |
| O  | 4.74471346  | 29.10870154 | 82.82032540 |
| Zn | 6.34364121  | 30.06587036 | 78.15716443 |
| O  | 6.38810609  | 30.03600380 | 80.18444153 |
| Zn | 8.05149133  | 29.08245765 | 80.81374152 |
| O  | 8.01518257  | 29.09639137 | 82.84936842 |
| Zn | 9.67065618  | 30.03407443 | 78.15903099 |
| O  | 9.67832008  | 30.04197640 | 80.19256744 |
| Zn | 11.31761991 | 29.08868576 | 80.82255280 |
| O  | 11.30963596 | 29.08807983 | 82.85887674 |
| Zn | 12.95953290 | 30.03790241 | 78.16667194 |
| O  | 12.96117961 | 30.03636594 | 80.20023527 |
| Zn | 14.60345340 | 29.08759081 | 80.82653421 |
| O  | 14.60005524 | 29.09019807 | 82.86350432 |
| Zn | 16.24635741 | 30.03612064 | 78.16967036 |
| O  | 16.24635521 | 30.03850006 | 80.20376404 |
| Zn | 17.88925735 | 29.08758844 | 80.82653728 |
| O  | 17.89265371 | 29.09019528 | 82.86350670 |
| Zn | 19.53318162 | 30.03789796 | 78.16667912 |
| O  | 19.53153177 | 30.03636105 | 80.20024321 |
| Zn | 21.17509264 | 29.08868001 | 80.82256370 |
| O  | 21.18307414 | 29.08807445 | 82.85888817 |
| Zn | 22.82205708 | 30.03407222 | 78.15904651 |
| O  | 22.81439088 | 30.04197131 | 80.19258205 |
| Zn | 24.44122287 | 29.08245395 | 80.81375672 |
| O  | 24.47752321 | 29.09638340 | 82.84938679 |
| Zn | 26.14907234 | 30.06586429 | 78.15717936 |
| O  | 26.10460677 | 30.03599792 | 80.18446202 |
| Zn | 27.49446579 | 28.87337154 | 80.95725706 |
| O  | 27.74799119 | 29.10869643 | 82.82034917 |
| Zn | 4.92894469  | 33.05391303 | 78.30218426 |
| O  | 4.71860363  | 32.87540567 | 80.17554307 |
| Zn | 6.32384273  | 31.93120803 | 80.79669021 |
| O  | 6.36043860  | 31.95507651 | 82.83089251 |
| Zn | 8.05094560  | 32.87215752 | 78.16406334 |
| O  | 8.01513667  | 32.89238568 | 80.19143728 |
| Zn | 9.65178038  | 31.94705640 | 80.80771084 |
| O  | 9.66753377  | 31.93856861 | 82.84600366 |
| Zn | 11.31825636 | 32.88866318 | 78.15892394 |
| O  | 11.31469492 | 32.87723885 | 80.19244699 |
| Zn | 12.95952649 | 31.93345850 | 80.82240782 |
| O  | 12.95663939 | 31.94157345 | 82.85873535 |

|    |             |             |             |
|----|-------------|-------------|-------------|
| Zn | 14.60607843 | 32.88213794 | 78.16568605 |
| O  | 14.60236306 | 32.88584637 | 80.19906132 |
| Zn | 16.24635354 | 31.93808241 | 80.82487647 |
| O  | 16.24635174 | 31.93928081 | 82.86154047 |
| Zn | 17.88663218 | 32.88213622 | 78.16569056 |
| O  | 17.89034458 | 32.88584138 | 80.19906575 |
| Zn | 19.53318338 | 31.93345440 | 80.82241632 |
| O  | 19.53606511 | 31.94156740 | 82.85874398 |
| Zn | 21.17445689 | 32.88865574 | 78.15893789 |
| O  | 21.17801457 | 32.87723187 | 80.19246064 |
| Zn | 22.84093311 | 31.94705248 | 80.80772804 |
| O  | 22.82517629 | 31.93856420 | 82.84602284 |
| Zn | 24.44177267 | 32.87215749 | 78.16408254 |
| O  | 24.47757835 | 32.89238233 | 80.19145547 |
| Zn | 26.16887162 | 31.93120275 | 80.79671489 |
| O  | 26.13226821 | 31.95506920 | 82.83091225 |
| Zn | 27.56377325 | 33.05390048 | 78.30220973 |
| O  | 27.77411520 | 32.87539701 | 80.17556956 |
| Zn | 5.01840984  | 34.62220498 | 80.91943506 |
| O  | 4.72162952  | 34.79421270 | 82.79362293 |
| Zn | 6.33233050  | 35.48543871 | 78.30218141 |
| O  | 6.38108794  | 35.75572957 | 80.17566573 |
| Zn | 8.00143892  | 34.83754814 | 80.79647440 |
| O  | 7.99943207  | 34.79463647 | 82.83076916 |
| Zn | 9.62695128  | 35.75432834 | 78.15675236 |
| O  | 9.67458135  | 35.73028765 | 80.18414993 |
| Zn | 11.33162410 | 34.76581487 | 80.81340040 |
| O  | 11.30210416 | 34.79102047 | 82.84905622 |
| Zn | 12.96875757 | 35.70830257 | 78.16060872 |
| O  | 12.96428731 | 35.74391138 | 80.19447106 |
| Zn | 14.59926227 | 34.78668991 | 80.81693951 |
| O  | 14.61067112 | 34.78811565 | 82.85308614 |
| Zn | 16.24635512 | 35.75412620 | 78.15440004 |
| O  | 16.24635365 | 35.73222497 | 80.19007654 |
| Zn | 17.89344537 | 34.78668683 | 80.81694535 |
| O  | 17.88203119 | 34.78811248 | 82.85309266 |
| Zn | 19.52395281 | 35.70829948 | 78.16061671 |
| O  | 19.52841877 | 35.74390851 | 80.19447830 |
| Zn | 21.16108661 | 34.76580921 | 80.81341113 |
| O  | 21.19059792 | 34.79101109 | 82.84906901 |
| Zn | 22.86575817 | 35.75431393 | 78.15676475 |
| O  | 22.81812525 | 35.73028052 | 80.18416120 |
| Zn | 24.49126654 | 34.83754081 | 80.79649733 |
| O  | 24.49326782 | 34.79462794 | 82.83078663 |
| Zn | 26.16038425 | 35.48543031 | 78.30220549 |
| O  | 26.11162538 | 35.75572241 | 80.17568816 |
| Zn | 27.47430377 | 34.62219789 | 80.91946013 |

|    |             |             |             |
|----|-------------|-------------|-------------|
| O  | 27.77107416 | 34.79420184 | 82.79364975 |
| Zn | 9.98622599  | 37.51544199 | 80.95672186 |
| O  | 9.65599096  | 37.61749496 | 82.81990893 |
| Zn | 11.25985297 | 38.24574583 | 78.30782092 |
| O  | 11.34053728 | 38.58255414 | 80.16968519 |
| Zn | 12.96400465 | 37.68446784 | 80.80940506 |
| O  | 12.96316930 | 37.63495705 | 82.83794397 |
| Zn | 14.56898671 | 38.62856268 | 78.15068257 |
| O  | 14.60934844 | 38.60548333 | 80.18390120 |
| Zn | 16.24635553 | 37.61020779 | 80.82065517 |
| O  | 16.24635208 | 37.65385370 | 82.84923263 |
| Zn | 17.92372361 | 38.62855570 | 78.15068810 |
| O  | 17.88335852 | 38.60547849 | 80.18390588 |
| Zn | 19.52869518 | 37.68445969 | 80.80941480 |
| O  | 19.52953421 | 37.63494892 | 82.83794716 |
| Zn | 21.23285979 | 38.24574186 | 78.30783468 |
| O  | 21.15216533 | 38.58254987 | 80.16969481 |
| Zn | 22.50648474 | 37.51544054 | 80.95673687 |
| O  | 22.83671345 | 37.61747831 | 82.81992385 |
| Zn | 14.84240233 | 40.40666909 | 80.95770577 |
| O  | 14.58445731 | 40.50236657 | 82.83158388 |
| Zn | 16.24635255 | 41.10061420 | 78.28096325 |
| O  | 16.24634972 | 41.43987780 | 80.15515257 |
| Zn | 17.65029498 | 40.40666976 | 80.95771038 |
| O  | 17.90824134 | 40.50236226 | 82.83158607 |
| Zn | 14.83883694 | 15.86158774 | 83.59234497 |
| O  | 14.58089867 | 15.75773482 | 85.46727963 |
| Zn | 16.24635186 | 15.13528053 | 86.19739821 |
| O  | 16.24635116 | 14.77675037 | 88.07157223 |
| Zn | 17.65388024 | 15.86158588 | 83.59234720 |
| O  | 17.91180918 | 15.75773054 | 85.46728553 |
| Zn | 9.97516438  | 18.75877096 | 83.60010593 |
| O  | 9.64250004  | 18.65337920 | 85.46431589 |
| Zn | 11.24926184 | 17.99914420 | 86.22814394 |
| O  | 11.31478946 | 17.65235872 | 88.09337777 |
| Zn | 12.96069781 | 18.58858598 | 83.45565987 |
| O  | 12.95938824 | 18.63053186 | 85.48686133 |
| Zn | 14.56643776 | 17.61681471 | 86.09096452 |
| O  | 14.60002982 | 17.61719219 | 88.13329739 |
| Zn | 16.24635376 | 18.65913857 | 83.46829899 |
| O  | 16.24635211 | 18.60645224 | 85.50044367 |
| Zn | 17.92626466 | 17.61680626 | 86.09096557 |
| O  | 17.89266764 | 17.61718904 | 88.13329734 |
| Zn | 19.53202133 | 18.58857577 | 83.45566124 |
| O  | 19.53331657 | 18.63052390 | 85.48686833 |
| Zn | 21.24344059 | 17.99913641 | 86.22814761 |
| O  | 21.17791226 | 17.65235049 | 88.09338501 |

|    |             |             |             |
|----|-------------|-------------|-------------|
| Zn | 22.51754429 | 18.75876526 | 83.60011624 |
| O  | 22.85020489 | 18.65335905 | 85.46432856 |
| Zn | 5.00868683  | 21.65077231 | 83.57655241 |
| O  | 4.71020766  | 21.47771016 | 85.45108621 |
| Zn | 6.30561880  | 20.77231734 | 86.25001056 |
| O  | 6.33723194  | 20.49404359 | 88.12611518 |
| Zn | 7.99196486  | 21.43800591 | 83.45318383 |
| O  | 7.98504777  | 21.47797277 | 85.48984780 |
| Zn | 9.60382591  | 20.50694104 | 86.10395128 |
| O  | 9.62951499  | 20.52270255 | 88.13879662 |
| Zn | 11.32492752 | 21.50741980 | 83.46808433 |
| O  | 11.29207918 | 21.47700538 | 85.50776748 |
| Zn | 12.95501624 | 20.54585260 | 86.11574626 |
| O  | 12.93788104 | 20.49565827 | 88.16379067 |
| Zn | 14.59656153 | 21.48493218 | 83.46907643 |
| O  | 14.60596556 | 21.47657431 | 85.51000968 |
| Zn | 16.24635229 | 20.49631476 | 86.10927615 |
| O  | 16.24635146 | 20.49803281 | 88.16122611 |
| Zn | 17.89615144 | 21.48492799 | 83.46907668 |
| O  | 17.88674294 | 21.47657140 | 85.51000981 |
| Zn | 19.53768888 | 20.54584693 | 86.11574854 |
| O  | 19.55482410 | 20.49565435 | 88.16379392 |
| Zn | 21.16778357 | 21.50741165 | 83.46809230 |
| O  | 21.20063087 | 21.47699452 | 85.50777344 |
| Zn | 22.88888492 | 20.50692134 | 86.10396265 |
| O  | 22.86319182 | 20.52269060 | 88.13880814 |
| Zn | 24.50075242 | 21.43799666 | 83.45319118 |
| O  | 24.50766432 | 21.47796339 | 85.48986069 |
| Zn | 26.18709129 | 20.77231059 | 86.25002245 |
| O  | 26.15547496 | 20.49404068 | 88.12612860 |
| Zn | 27.48402386 | 21.65076315 | 83.57656840 |
| O  | 27.78250361 | 21.47769854 | 85.45110153 |
| Zn | 4.89749028  | 23.21186553 | 86.25003691 |
| O  | 4.67177626  | 23.37933288 | 88.12605796 |
| Zn | 6.31637530  | 24.34057532 | 83.45317835 |
| O  | 6.34795335  | 24.31390022 | 85.48978453 |
| Zn | 8.02005928  | 23.38862691 | 86.13452827 |
| O  | 7.96379990  | 23.35667789 | 88.17600054 |
| Zn | 9.64311346  | 24.32659494 | 83.46911899 |
| O  | 9.65207723  | 24.33120214 | 85.51350707 |
| Zn | 11.29549519 | 23.37112735 | 86.12423658 |
| O  | 11.27501105 | 23.36892003 | 88.17646227 |
| Zn | 12.95388538 | 24.34015370 | 83.47857171 |
| O  | 12.94655557 | 24.32745728 | 85.52107171 |
| Zn | 14.59852077 | 23.37598733 | 86.12166309 |
| O  | 14.58963266 | 23.35845990 | 88.17337319 |
| Zn | 16.24635715 | 24.33573431 | 83.47687383 |

|    |             |             |             |
|----|-------------|-------------|-------------|
| O  | 16.24635384 | 24.33023938 | 85.51893499 |
| Zn | 17.89418373 | 23.37598535 | 86.12166413 |
| O  | 17.90306965 | 23.35845605 | 88.17337448 |
| Zn | 19.53882686 | 24.34014793 | 83.47857625 |
| O  | 19.54615132 | 24.32745130 | 85.52107641 |
| Zn | 21.19720938 | 23.37111624 | 86.12423815 |
| O  | 21.21769106 | 23.36891107 | 88.17646619 |
| Zn | 22.84959544 | 24.32658885 | 83.46912676 |
| O  | 22.84062497 | 24.33119722 | 85.51351343 |
| Zn | 24.47264283 | 23.38862517 | 86.13453828 |
| O  | 24.52890238 | 23.35667450 | 88.17601351 |
| Zn | 26.17633201 | 24.34056890 | 83.45318899 |
| O  | 26.14475264 | 24.31389291 | 85.48979995 |
| Zn | 27.59521431 | 23.21185428 | 86.25004972 |
| O  | 27.82092746 | 23.37932661 | 88.12606898 |
| Zn | 4.98846805  | 27.39765663 | 83.59956936 |
| O  | 4.73080950  | 27.16195270 | 85.46369639 |
| Zn | 6.31665139  | 26.20148640 | 86.10341116 |
| O  | 6.34296077  | 26.21681808 | 88.13797106 |
| Zn | 8.04330850  | 27.19303231 | 83.46775969 |
| O  | 8.00079776  | 27.17888964 | 85.50734980 |
| Zn | 9.64272345  | 26.23444350 | 86.12403364 |
| O  | 9.63000961  | 26.21883916 | 88.17623332 |
| Zn | 11.31035512 | 27.18761637 | 83.47839863 |
| O  | 11.29612599 | 27.18672248 | 85.52086912 |
| Zn | 12.94413269 | 26.23200067 | 86.12104846 |
| O  | 12.93507573 | 26.22741812 | 88.17291506 |
| Zn | 14.60081783 | 27.18956668 | 83.47826964 |
| O  | 14.59522554 | 27.18575164 | 85.52077201 |
| Zn | 16.24634954 | 26.23380884 | 86.11847278 |
| O  | 16.24634995 | 26.22604540 | 88.16948333 |
| Zn | 17.89189411 | 27.18956418 | 83.47827367 |
| O  | 17.89747785 | 27.18574878 | 85.52077698 |
| Zn | 19.54856844 | 26.23199480 | 86.12105504 |
| O  | 19.55762589 | 26.22741261 | 88.17292224 |
| Zn | 21.18235495 | 27.18760970 | 83.47840796 |
| O  | 21.19657584 | 27.18671731 | 85.52087841 |
| Zn | 22.84998108 | 26.23443953 | 86.12404251 |
| O  | 22.86269249 | 26.21883419 | 88.17624405 |
| Zn | 24.44940059 | 27.19302751 | 83.46777695 |
| O  | 24.49190939 | 27.17888057 | 85.50736422 |
| Zn | 26.17605631 | 26.20147893 | 86.10343616 |
| O  | 26.14974378 | 26.21681116 | 88.13799187 |
| Zn | 27.50423632 | 27.39765311 | 83.59959487 |
| O  | 27.76189876 | 27.16194858 | 85.46371969 |
| Zn | 4.96768733  | 28.88057376 | 86.22738506 |
| O  | 4.69998006  | 29.11102383 | 88.09252336 |



|    |             |             |             |
|----|-------------|-------------|-------------|
| Zn | 6.33346312  | 30.06908089 | 83.45510000 |
| O  | 6.36949841  | 30.04606922 | 85.48616222 |
| Zn | 8.02602547  | 29.08456073 | 86.11529006 |
| O  | 7.97355052  | 29.09573461 | 88.16305813 |
| Zn | 9.65945753  | 30.03804991 | 83.46849996 |
| O  | 9.65732337  | 30.04939613 | 85.50937759 |
| Zn | 11.29846932 | 29.09304217 | 86.12125800 |
| O  | 11.27833980 | 29.09498767 | 88.17288252 |
| Zn | 12.95264218 | 30.04192119 | 83.47650770 |
| O  | 12.94837426 | 30.04376664 | 85.51855178 |
| Zn | 14.59674037 | 29.09157001 | 86.11829357 |
| O  | 14.58947945 | 29.09636492 | 88.16928897 |
| Zn | 16.24635411 | 30.04033865 | 83.47809678 |
| O  | 16.24634965 | 30.04616217 | 85.52059447 |
| Zn | 17.89595496 | 29.09156729 | 86.11829704 |
| O  | 17.90321770 | 29.09636282 | 88.16929224 |
| Zn | 19.54006423 | 30.04191556 | 83.47651417 |
| O  | 19.54432466 | 30.04376048 | 85.51855843 |
| Zn | 21.19422695 | 29.09303555 | 86.12126707 |
| O  | 21.21435713 | 29.09498290 | 88.17289216 |
| Zn | 22.83324662 | 30.03804645 | 83.46851566 |
| O  | 22.83537414 | 30.04938979 | 85.50939244 |
| Zn | 24.46667353 | 29.08455548 | 86.11530451 |
| O  | 24.51914325 | 29.09572467 | 88.16307653 |
| Zn | 26.15923870 | 30.06907318 | 83.45511301 |
| O  | 26.12319828 | 30.04606299 | 85.48618001 |
| Zn | 27.52501478 | 28.88057269 | 86.22740164 |
| O  | 27.79271159 | 29.11102357 | 88.09254258 |
| Zn | 4.91204703  | 33.05945574 | 83.59074123 |
| O  | 4.69302926  | 32.88718708 | 85.46564523 |
| Zn | 6.29559361  | 31.94473048 | 86.08961106 |
| O  | 6.31248248  | 31.97440333 | 88.13190121 |
| Zn | 8.03789507  | 32.87968631 | 83.46697479 |
| O  | 7.99250836  | 32.90534793 | 85.49923009 |
| Zn | 9.62914759  | 31.96011264 | 86.10816684 |
| O  | 9.63033545  | 31.96005550 | 88.16005298 |
| Zn | 11.30925218 | 32.89636921 | 83.46833856 |
| O  | 11.29779733 | 32.89162349 | 85.50920928 |
| Zn | 12.94625365 | 31.94787762 | 86.12108202 |
| O  | 12.93506016 | 31.96519788 | 88.17275207 |
| Zn | 14.60275998 | 32.89165533 | 83.47807907 |
| O  | 14.59592029 | 32.90349979 | 85.52057502 |
| Zn | 16.24634631 | 31.95282857 | 86.12063686 |
| O  | 16.24634685 | 31.96384123 | 88.17247962 |
| Zn | 17.88994245 | 32.89165299 | 83.47808401 |
| O  | 17.89677667 | 32.90349420 | 85.52057980 |
| Zn | 19.54644114 | 31.94787113 | 86.12109009 |

|    |             |             |             |
|----|-------------|-------------|-------------|
| O  | 19.55763379 | 31.96519176 | 88.17276056 |
| Zn | 21.18345172 | 32.89635915 | 83.46835408 |
| O  | 21.19489980 | 32.89161373 | 85.50922414 |
| Zn | 22.86355057 | 31.96010688 | 86.10818587 |
| O  | 22.86236286 | 31.96005083 | 88.16007451 |
| Zn | 24.45481253 | 32.87968428 | 83.46699449 |
| O  | 24.50019125 | 32.90534300 | 85.49924843 |
| Zn | 26.19710363 | 31.94472450 | 86.08963460 |
| O  | 26.18020944 | 31.97439648 | 88.13192018 |
| Zn | 27.58065830 | 33.05944267 | 83.59076669 |
| O  | 27.79967239 | 32.88717728 | 85.46567200 |
| Zn | 4.98636256  | 34.64068341 | 86.19572818 |
| O  | 4.67575081  | 34.82082856 | 88.06982140 |
| Zn | 6.31904694  | 35.49727251 | 83.59078829 |
| O  | 6.35816769  | 35.77192001 | 85.46581833 |
| Zn | 7.97566054  | 34.85505268 | 86.08935252 |
| O  | 7.95883073  | 34.82641821 | 88.13170333 |
| Zn | 9.61913359  | 35.76146280 | 83.45459377 |
| O  | 9.65661898  | 35.74119826 | 85.48578268 |
| Zn | 11.31719104 | 34.78672910 | 86.11477973 |
| O  | 11.28207633 | 34.82731177 | 88.16263218 |
| Zn | 12.96446016 | 35.71871850 | 83.46717121 |
| O  | 12.95498470 | 35.76180981 | 85.50692848 |
| Zn | 14.59359897 | 34.81145115 | 86.12339007 |
| O  | 14.60145387 | 34.83114497 | 88.17561725 |
| Zn | 16.24635063 | 35.76653015 | 83.46868709 |
| O  | 16.24634839 | 35.75576237 | 85.51305102 |
| Zn | 17.89909506 | 34.81144677 | 86.12339758 |
| O  | 17.89123850 | 34.83114199 | 88.17562438 |
| Zn | 19.52824127 | 35.71871381 | 83.46718079 |
| O  | 19.53770934 | 35.76180536 | 85.50693731 |
| Zn | 21.17550386 | 34.78672153 | 86.11479209 |
| O  | 21.21061314 | 34.82730273 | 88.16264774 |
| Zn | 22.87356371 | 35.76144393 | 83.45460566 |
| O  | 22.83607217 | 35.74118784 | 85.48579369 |
| Zn | 24.51702923 | 34.85504344 | 86.08937502 |
| O  | 24.53385721 | 34.82641185 | 88.13172245 |
| Zn | 26.17365337 | 35.49726385 | 83.59081112 |
| O  | 26.13452752 | 35.77191311 | 85.46583905 |
| Zn | 27.50633255 | 34.64067562 | 86.19575024 |
| O  | 27.81693816 | 34.82081832 | 88.06984371 |
| Zn | 9.96483168  | 37.53814164 | 86.22659104 |
| O  | 9.63155170  | 37.65494694 | 88.09185224 |
| Zn | 11.25964389 | 38.26212022 | 83.59909479 |
| O  | 11.33475396 | 38.60283765 | 85.46331438 |
| Zn | 12.95916217 | 37.70885409 | 86.10267831 |
| O  | 12.95970508 | 37.67936904 | 88.13746693 |

|    |             |             |             |
|----|-------------|-------------|-------------|
| Zn | 14.57080919 | 38.64103584 | 83.45282560 |
| O  | 14.60920536 | 38.62649933 | 85.48945009 |
| Zn | 16.24635127 | 37.64048664 | 86.13386203 |
| O  | 16.24635021 | 37.70579610 | 88.17517558 |
| Zn | 17.92189349 | 38.64102532 | 83.45282903 |
| O  | 17.88349311 | 38.62649269 | 85.48945273 |
| Zn | 19.53352677 | 37.70884418 | 86.10269245 |
| O  | 19.53298728 | 37.67936323 | 88.13747693 |
| Zn | 21.23305803 | 38.26211327 | 83.59911046 |
| O  | 21.15793527 | 38.60283065 | 85.46332539 |
| Zn | 22.52786641 | 37.53813551 | 86.22660408 |
| O  | 22.86114083 | 37.65493158 | 88.09186453 |
| Zn | 14.83761107 | 40.43391762 | 86.24931837 |
| O  | 14.58037462 | 40.54610992 | 88.12544266 |
| Zn | 16.24634974 | 41.11851439 | 83.57630705 |
| O  | 16.24634793 | 41.46309618 | 85.45097431 |
| Zn | 17.65508525 | 40.43391495 | 86.24931953 |
| O  | 17.91232795 | 40.54610822 | 88.12544029 |
| Zn | 14.83346796 | 15.79684310 | 88.86993992 |
| O  | 14.58173972 | 15.67316626 | 90.75222357 |
| Zn | 16.24634686 | 15.04208208 | 91.47703931 |
| O  | 16.24634541 | 14.67143537 | 93.37031488 |
| Zn | 17.65923308 | 15.79684356 | 88.86993983 |
| O  | 17.91095621 | 15.67316641 | 90.75222594 |
| Zn | 9.94136241  | 18.71505560 | 88.85158277 |
| O  | 9.59618980  | 18.58662837 | 90.71434003 |
| Zn | 11.19261599 | 17.92552776 | 91.48222371 |
| O  | 11.27784623 | 17.54515087 | 93.33738714 |
| Zn | 12.94211870 | 18.53496921 | 88.73083221 |
| O  | 12.93064556 | 18.55384976 | 90.77121352 |
| Zn | 14.54385601 | 17.53633655 | 91.34941065 |
| O  | 14.57255909 | 17.50292248 | 93.41561580 |
| Zn | 16.24634692 | 18.60105089 | 88.75201560 |
| O  | 16.24634576 | 18.52825382 | 90.80252590 |
| Zn | 17.94883410 | 17.53633259 | 91.34941224 |
| O  | 17.92012719 | 17.50291644 | 93.41561521 |
| Zn | 19.55058336 | 18.53496138 | 88.73083320 |
| O  | 19.56204613 | 18.55384581 | 90.77121811 |
| Zn | 21.30007322 | 17.92551950 | 91.48222970 |
| O  | 21.21484409 | 17.54514768 | 93.33739715 |
| Zn | 22.55133274 | 18.71504673 | 88.85158985 |
| O  | 22.89650127 | 18.58661188 | 90.71434918 |
| Zn | 4.96190192  | 21.62344915 | 88.85124499 |
| O  | 4.64178395  | 21.43894992 | 90.72401479 |
| Zn | 6.21180263  | 20.72025582 | 91.54820661 |
| O  | 6.22830700  | 20.45831501 | 93.43640264 |
| Zn | 7.95167037  | 21.40167004 | 88.76309807 |

|    |             |             |             |
|----|-------------|-------------|-------------|
| O  | 7.92535514  | 21.42075753 | 90.82030749 |
| Zn | 9.53475159  | 20.40823089 | 91.40506678 |
| O  | 9.57209854  | 20.36307089 | 93.47615383 |
| Zn | 11.29084121 | 21.46418733 | 88.76307994 |
| O  | 11.23995151 | 21.41056335 | 90.82817957 |
| Zn | 12.92287718 | 20.46601825 | 91.36035823 |
| O  | 12.90612964 | 20.41039757 | 93.44712513 |
| Zn | 14.58714875 | 21.44161470 | 88.75039818 |
| O  | 14.59347633 | 21.41527318 | 90.81901905 |
| Zn | 16.24634984 | 20.42160715 | 91.35693470 |
| O  | 16.24635029 | 20.39477013 | 93.47449841 |
| Zn | 17.90555373 | 21.44161258 | 88.75039618 |
| O  | 17.89922605 | 21.41527324 | 90.81901718 |
| Zn | 19.56982101 | 20.46601404 | 91.36035558 |
| O  | 19.58656699 | 20.41039257 | 93.44712272 |
| Zn | 21.20186222 | 21.46417885 | 88.76308271 |
| O  | 21.25275036 | 21.41055680 | 90.82818133 |
| Zn | 22.95794834 | 20.40821735 | 91.40506854 |
| O  | 22.92059633 | 20.36305362 | 93.47615247 |
| Zn | 24.54103814 | 21.40166355 | 88.76310089 |
| O  | 24.56734399 | 21.42075028 | 90.82030966 |
| Zn | 26.28089448 | 20.72024362 | 91.54821093 |
| O  | 26.26437364 | 20.45829437 | 93.43640332 |
| Zn | 27.53080457 | 21.62344619 | 88.85126015 |
| O  | 27.85091659 | 21.43893705 | 90.72402993 |
| Zn | 4.80473850  | 23.15942295 | 91.54513694 |
| O  | 4.58298039  | 23.30813624 | 93.43235606 |
| Zn | 6.26473403  | 24.32465949 | 88.76242585 |
| O  | 6.26864488  | 24.29272962 | 90.81917034 |
| Zn | 7.93719890  | 23.34183362 | 91.40869371 |
| O  | 7.87631921  | 23.30776137 | 93.50240103 |
| Zn | 9.60205414  | 24.30315380 | 88.76155870 |
| O  | 9.59223448  | 24.29720232 | 90.83618364 |
| Zn | 11.25387681 | 23.32244069 | 91.35549933 |
| O  | 11.23433504 | 23.31184724 | 93.46279135 |
| Zn | 12.93310776 | 24.31497484 | 88.74829300 |
| O  | 12.91692231 | 24.29212407 | 90.81555180 |
| Zn | 14.58478431 | 23.33394913 | 91.34539456 |
| O  | 14.57809033 | 23.31002999 | 93.44300513 |
| Zn | 16.24635267 | 24.31272040 | 88.74469684 |
| O  | 16.24634933 | 24.30010492 | 90.81148500 |
| Zn | 17.90790967 | 23.33394811 | 91.34539746 |
| O  | 17.91460067 | 23.31002845 | 93.44300589 |
| Zn | 19.55959645 | 24.31496912 | 88.74829789 |
| O  | 19.57577535 | 24.29212218 | 90.81555663 |
| Zn | 21.23881719 | 23.32243456 | 91.35550348 |
| O  | 21.25835209 | 23.31183540 | 93.46278909 |

|    |             |             |             |
|----|-------------|-------------|-------------|
| Zn | 22.89064530 | 24.30314939 | 88.76156357 |
| O  | 22.90045755 | 24.29719962 | 90.83618691 |
| Zn | 24.55549240 | 23.34182615 | 91.40869356 |
| O  | 24.61636067 | 23.30775090 | 93.50239919 |
| Zn | 26.22797225 | 24.32465096 | 88.76244121 |
| O  | 26.22405767 | 24.29271577 | 90.81918915 |
| Zn | 27.68795766 | 23.15939991 | 91.54516824 |
| O  | 27.90969168 | 23.30810846 | 93.43239114 |
| Zn | 4.93345620  | 27.39033773 | 88.85126542 |
| O  | 4.64958164  | 27.15600720 | 90.71389399 |
| Zn | 6.19586508  | 26.19208862 | 91.40636214 |
| O  | 6.17460060  | 26.24854113 | 93.47681418 |
| Zn | 7.98845397  | 27.18538699 | 88.76289320 |
| O  | 7.91650754  | 27.16756202 | 90.82769384 |
| Zn | 9.57895101  | 26.22376849 | 91.35549709 |
| O  | 9.55985977  | 26.21284403 | 93.46268454 |
| Zn | 11.27793957 | 27.18239036 | 88.74821881 |
| O  | 11.25025410 | 27.17928823 | 90.81544379 |
| Zn | 12.91665165 | 26.21665249 | 91.33780626 |
| O  | 12.90716913 | 26.21134417 | 93.42610423 |
| Zn | 14.59094743 | 27.18395304 | 88.74075289 |
| O  | 14.58257527 | 27.17874138 | 90.80558475 |
| Zn | 16.24634488 | 26.22052785 | 91.34177126 |
| O  | 16.24634650 | 26.21374073 | 93.43592356 |
| Zn | 17.90175687 | 27.18395030 | 88.74075602 |
| O  | 17.91012168 | 27.17873992 | 90.80558970 |
| Zn | 19.57604098 | 26.21664955 | 91.33781063 |
| O  | 19.58552296 | 26.21133816 | 93.42610873 |
| Zn | 21.21476316 | 27.18238485 | 88.74822851 |
| O  | 21.24244228 | 27.17928614 | 90.81545297 |
| Zn | 22.91374240 | 26.22376493 | 91.35550752 |
| O  | 22.93282928 | 26.21283693 | 93.46268915 |
| Zn | 24.50424683 | 27.18538044 | 88.76290930 |
| O  | 24.57619117 | 27.16755053 | 90.82770792 |
| Zn | 26.29683477 | 26.19208011 | 91.40637720 |
| O  | 26.31809193 | 26.24853130 | 93.47682422 |
| Zn | 27.55924033 | 27.39033908 | 88.85128568 |
| O  | 27.84311811 | 27.15600432 | 90.71391172 |
| Zn | 4.87541061  | 28.86908206 | 91.48156644 |
| O  | 4.58813248  | 29.13470277 | 93.33621778 |
| Zn | 6.27742853  | 30.07985978 | 88.72993480 |
| O  | 6.28852911  | 30.05995918 | 90.77004184 |
| Zn | 7.94047086  | 29.09718350 | 91.36007674 |
| O  | 7.88348652  | 29.11102567 | 93.44601154 |
| Zn | 9.61704586  | 30.05160424 | 88.74969322 |
| O  | 9.59772965  | 30.06951682 | 90.81809180 |
| Zn | 11.25473794 | 29.10279588 | 91.34531689 |

|    |             |             |             |
|----|-------------|-------------|-------------|
| O  | 11.23038950 | 29.10931014 | 93.44289129 |
| Zn | 12.93252799 | 30.05344730 | 88.74432836 |
| O  | 12.92195142 | 30.05914969 | 90.81111653 |
| Zn | 14.58490186 | 29.09872091 | 91.34164218 |
| O  | 14.57888099 | 29.10246113 | 93.43577203 |
| Zn | 16.24635020 | 30.05167998 | 88.74054640 |
| O  | 16.24634772 | 30.06100804 | 90.80539322 |
| Zn | 17.90778410 | 29.09871816 | 91.34164343 |
| O  | 17.91380808 | 29.10245827 | 93.43577868 |
| Zn | 19.56017002 | 30.05344169 | 88.74433683 |
| O  | 19.57074115 | 30.05914481 | 90.81112629 |
| Zn | 21.23795045 | 29.10279130 | 91.34532856 |
| O  | 21.26229869 | 29.10930586 | 93.44290154 |
| Zn | 22.87564671 | 30.05159965 | 88.74970804 |
| O  | 22.89495918 | 30.06951114 | 90.81810384 |
| Zn | 24.55221832 | 29.09717700 | 91.36008918 |
| O  | 24.60919941 | 29.11101813 | 93.44601581 |
| Zn | 26.21526137 | 30.07985395 | 88.72994887 |
| O  | 26.20415747 | 30.05995534 | 90.77005730 |
| Zn | 27.61727967 | 28.86907994 | 91.48158048 |
| O  | 27.90454598 | 29.13469161 | 93.33623629 |
| Zn | 4.85331505  | 33.08737583 | 88.86829585 |
| O  | 4.62024079  | 32.93089299 | 90.75062464 |
| Zn | 6.21460618  | 31.96567782 | 91.34775225 |
| O  | 6.20030275  | 32.00808345 | 93.41372285 |
| Zn | 7.98753417  | 32.90868696 | 88.75028931 |
| O  | 7.92484454  | 32.94450484 | 90.80083671 |
| Zn | 9.56438325  | 31.99756940 | 91.35579103 |
| O  | 9.54100745  | 32.01130112 | 93.47339205 |
| Zn | 11.27629144 | 32.92618986 | 88.74950940 |
| O  | 11.25076054 | 32.93334525 | 90.81808787 |
| Zn | 12.91648056 | 31.98118969 | 91.34474401 |
| O  | 12.89911460 | 31.99926978 | 93.44225815 |
| Zn | 14.59122431 | 32.92226122 | 88.74761141 |
| O  | 14.57982319 | 32.94722497 | 90.81483446 |
| Zn | 16.24634458 | 31.98478935 | 91.33735546 |
| O  | 16.24634162 | 31.99606854 | 93.42557928 |
| Zn | 17.90147168 | 32.92225875 | 88.74761615 |
| O  | 17.91287259 | 32.94722292 | 90.81483868 |
| Zn | 19.57620758 | 31.98118453 | 91.34475236 |
| O  | 19.59357154 | 31.99926628 | 93.44226696 |
| Zn | 21.21640239 | 32.92618011 | 88.74952629 |
| O  | 21.24193244 | 32.93333390 | 90.81810200 |
| Zn | 22.92830956 | 31.99756291 | 91.35580435 |
| O  | 22.95168439 | 32.01129309 | 93.47339915 |
| Zn | 24.50516273 | 32.90868654 | 88.75031210 |
| O  | 24.56785020 | 32.94450428 | 90.80085841 |

|    |             |             |             |
|----|-------------|-------------|-------------|
| Zn | 26.27808518 | 31.96567204 | 91.34777493 |
| O  | 26.29238674 | 32.00807509 | 93.41374307 |
| Zn | 27.63937668 | 33.08736452 | 88.86831748 |
| O  | 27.87245242 | 32.93088506 | 90.75064563 |
| Zn | 4.90534120  | 34.68838473 | 91.47462421 |
| O  | 4.58457091  | 34.87469604 | 93.36797526 |
| Zn | 6.26561599  | 35.53462393 | 88.86795995 |
| O  | 6.28475125  | 35.81406054 | 90.75032780 |
| Zn | 7.91731821  | 34.91473202 | 91.34705837 |
| O  | 7.87390092  | 34.90708923 | 93.41311189 |
| Zn | 9.58195893  | 35.80440386 | 88.72910406 |
| O  | 9.60453806  | 35.80440088 | 90.76943784 |
| Zn | 11.26399060 | 34.85477994 | 91.35913102 |
| O  | 11.22418197 | 34.89732185 | 93.44587741 |
| Zn | 12.94392326 | 35.76991857 | 88.76181382 |
| O  | 12.92317512 | 35.84048802 | 90.82696994 |
| Zn | 14.57179343 | 34.87228972 | 91.35453252 |
| O  | 14.57205687 | 34.89482642 | 93.46170280 |
| Zn | 16.24634731 | 35.81387040 | 88.76068672 |
| O  | 16.24634510 | 35.82482660 | 90.83520218 |
| Zn | 17.92089403 | 34.87228673 | 91.35453889 |
| O  | 17.92061718 | 34.89482446 | 93.46170968 |
| Zn | 19.54876839 | 35.76991394 | 88.76182756 |
| O  | 19.56951233 | 35.84048638 | 90.82698312 |
| Zn | 21.22869641 | 34.85477061 | 91.35914613 |
| O  | 21.26850158 | 34.89731024 | 93.44588471 |
| Zn | 22.91072752 | 35.80438973 | 88.72911729 |
| O  | 22.88814685 | 35.80439371 | 90.76944888 |
| Zn | 24.57536668 | 34.91473006 | 91.34707881 |
| O  | 24.61877699 | 34.90708923 | 93.41313221 |
| Zn | 26.22707309 | 35.53461774 | 88.86798119 |
| O  | 26.20793889 | 35.81405857 | 90.75034602 |
| Zn | 27.58734248 | 34.68837654 | 91.47464156 |
| O  | 27.90810564 | 34.87468493 | 93.36799443 |
| Zn | 9.92863001  | 37.62401277 | 91.47995486 |
| O  | 9.55583110  | 37.74011070 | 93.33508067 |
| Zn | 11.23848780 | 38.31338437 | 88.85015387 |
| O  | 11.29951201 | 38.67639353 | 90.71294496 |
| Zn | 12.90764326 | 37.81828817 | 91.40361953 |
| O  | 12.84925086 | 37.80896198 | 93.47466124 |
| Zn | 14.55916722 | 38.69390159 | 88.76142865 |
| O  | 14.58872184 | 38.70625810 | 90.81839389 |
| Zn | 16.24634052 | 37.73589970 | 91.40726153 |
| O  | 16.24633211 | 37.80577888 | 93.50083952 |
| Zn | 17.93353109 | 38.69390035 | 88.76144226 |
| O  | 17.90396437 | 38.70626466 | 90.81841226 |
| Zn | 19.58504101 | 37.81828404 | 91.40363278 |

|    |             |             |             |
|----|-------------|-------------|-------------|
| O  | 19.64342342 | 37.80895397 | 93.47467330 |
| Zn | 21.25420504 | 38.31337849 | 88.85016722 |
| O  | 21.19317043 | 38.67639246 | 90.71295372 |
| Zn | 22.56405410 | 37.62400811 | 91.47996276 |
| O  | 22.93684435 | 37.74010148 | 93.33508922 |
| Zn | 14.83787367 | 40.54081822 | 91.54454334 |
| O  | 14.60033914 | 40.65819461 | 93.43238823 |
| Zn | 16.24635340 | 41.17265941 | 88.85002668 |
| O  | 16.24634193 | 41.54191470 | 90.72298534 |
| Zn | 17.65479589 | 40.54082290 | 91.54457417 |
| O  | 17.89229539 | 40.65818974 | 93.43242745 |
| Zn | 14.74937414 | 15.64834682 | 94.07665512 |
| O  | 14.51557779 | 15.52073660 | 96.03342282 |
| Zn | 16.24633538 | 14.98424110 | 96.44278158 |
| Zn | 17.74330903 | 15.64834901 | 94.07666328 |
| O  | 17.97709865 | 15.52072321 | 96.03343438 |
| Zn | 9.94153801  | 18.50503070 | 94.25971617 |
| O  | 9.68589090  | 18.47159238 | 96.15243722 |
| Zn | 11.28019343 | 17.71253277 | 97.02331714 |
| Zn | 12.89006595 | 18.40722670 | 93.99590817 |
| O  | 12.94457350 | 18.50936965 | 96.06528258 |
| Zn | 14.49263583 | 17.42061335 | 96.45827120 |
| Zn | 16.24634821 | 18.44753158 | 93.95084521 |
| O  | 16.24635133 | 18.37641108 | 96.13403515 |
| Zn | 18.00006712 | 17.42059751 | 96.45829332 |
| Zn | 19.60262516 | 18.40722246 | 93.99591012 |
| O  | 19.54811664 | 18.50936338 | 96.06529152 |
| Zn | 21.21249010 | 17.71248456 | 97.02329063 |
| Zn | 22.55115129 | 18.50502813 | 94.25972504 |
| O  | 22.80679330 | 18.47157729 | 96.15244793 |
| Zn | 4.82287250  | 21.54899012 | 94.20144642 |
| O  | 4.56277996  | 21.39364990 | 96.12271277 |
| Zn | 6.18398106  | 20.49507541 | 96.58136172 |
| Zn | 7.88635492  | 21.29779836 | 93.99845007 |
| O  | 7.93304725  | 21.36801291 | 96.15971170 |
| Zn | 9.55323432  | 20.33399548 | 96.43748770 |
| Zn | 11.22488190 | 21.36533864 | 93.91306101 |
| O  | 11.22320454 | 21.39282840 | 96.10947713 |
| Zn | 12.89668223 | 20.41689888 | 96.31311493 |
| Zn | 14.56636697 | 21.36969293 | 93.90343468 |
| O  | 14.60267113 | 21.36514783 | 96.09842587 |
| Zn | 16.24635554 | 20.31055841 | 96.26506824 |
| Zn | 17.92634054 | 21.36969335 | 93.90343605 |
| O  | 17.89004244 | 21.36514687 | 96.09842819 |
| Zn | 19.59601869 | 20.41689236 | 96.31309834 |
| Zn | 21.26782373 | 21.36532704 | 93.91305530 |
| O  | 21.26950421 | 21.39281541 | 96.10947002 |



|    |             |             |             |
|----|-------------|-------------|-------------|
| Zn | 22.93947177 | 20.33398101 | 96.43749557 |
| Zn | 24.60633980 | 21.29778322 | 93.99846119 |
| O  | 24.55964903 | 21.36800320 | 96.15971304 |
| Zn | 26.30871535 | 20.49502731 | 96.58143031 |
| Zn | 27.66979048 | 21.54895915 | 94.20147927 |
| O  | 27.92989766 | 21.39363715 | 96.12274004 |
| Zn | 4.59521971  | 23.24541223 | 96.59450644 |
| Zn | 6.13888595  | 24.32126716 | 93.99988757 |
| O  | 6.22576018  | 24.32313018 | 96.15914399 |
| Zn | 7.86910896  | 23.30218768 | 96.29550902 |
| Zn | 9.54306037  | 24.26957926 | 93.90064831 |
| O  | 9.56157211  | 24.27975884 | 96.10038310 |
| Zn | 11.22694848 | 23.31167777 | 96.29030849 |
| Zn | 12.90923778 | 24.28677352 | 93.91656107 |
| O  | 12.90655903 | 24.27317804 | 96.10348134 |
| Zn | 14.57700138 | 23.29486924 | 96.33023091 |
| Zn | 16.24634886 | 24.28338812 | 93.91239107 |
| O  | 16.24634879 | 24.26754867 | 96.09751947 |
| Zn | 17.91568441 | 23.29487009 | 96.33024068 |
| Zn | 19.58346008 | 24.28676865 | 93.91656923 |
| O  | 19.58614175 | 24.27317163 | 96.10348869 |
| Zn | 21.26574049 | 23.31166374 | 96.29030425 |
| Zn | 22.94962744 | 24.26957182 | 93.90064798 |
| O  | 22.93111652 | 24.27975083 | 96.10038523 |
| Zn | 24.62357127 | 23.30217177 | 96.29551274 |
| Zn | 26.35378745 | 24.32125731 | 93.99988459 |
| O  | 26.26691543 | 24.32312085 | 96.15915337 |
| Zn | 27.89746287 | 23.24540731 | 96.59447167 |
| Zn | 4.75069458  | 27.49965234 | 94.26179286 |
| O  | 4.59603988  | 27.29129672 | 96.15341818 |
| Zn | 6.14117024  | 26.24301045 | 96.43863155 |
| Zn | 7.86915315  | 27.17795127 | 93.91394116 |
| O  | 7.89259548  | 27.16253677 | 96.10914619 |
| Zn | 9.55594495  | 26.20628072 | 96.29006263 |
| Zn | 11.24157167 | 27.17566900 | 93.91643105 |
| O  | 11.22830573 | 27.18054533 | 96.10338811 |
| Zn | 12.90353909 | 26.20957420 | 96.40663118 |
| Zn | 14.57193763 | 27.17283089 | 93.92688951 |
| O  | 14.57791158 | 27.17671318 | 96.10150283 |
| Zn | 16.24634275 | 26.19865367 | 96.35884148 |
| Zn | 17.92076893 | 27.17282625 | 93.92689238 |
| O  | 17.91478977 | 27.17671060 | 96.10151465 |
| Zn | 19.58914544 | 26.20956286 | 96.40665416 |
| Zn | 21.25112522 | 27.17566310 | 93.91644593 |
| O  | 21.26438921 | 27.18053728 | 96.10339800 |
| Zn | 22.93674099 | 26.20627169 | 96.29005944 |
| Zn | 24.62354011 | 27.17794406 | 93.91394813 |

|    |             |             |             |
|----|-------------|-------------|-------------|
| O  | 24.60009069 | 27.16252846 | 96.10915572 |
| Zn | 26.35150785 | 26.24299644 | 96.43864957 |
| Zn | 27.74199563 | 27.49964667 | 94.26181482 |
| O  | 27.89665373 | 27.29126473 | 96.15343465 |
| Zn | 4.75036839  | 29.04311447 | 97.03951770 |
| Zn | 6.14100015  | 30.09885213 | 93.99576803 |
| O  | 6.25627217  | 30.09635413 | 96.06391947 |
| Zn | 7.88338472  | 29.09983806 | 96.31755838 |
| Zn | 9.54374154  | 30.06896118 | 93.90365836 |
| O  | 9.55761079  | 30.10322860 | 96.09827465 |
| Zn | 11.21631757 | 29.11649975 | 96.32969871 |
| Zn | 12.90718565 | 30.06787453 | 93.91196252 |
| O  | 12.89314318 | 30.07638773 | 96.09715534 |
| Zn | 14.56543330 | 29.11070401 | 96.35861408 |
| Zn | 16.24634984 | 30.07364094 | 93.92666996 |
| O  | 16.24634893 | 30.06722608 | 96.10126060 |
| Zn | 17.92724788 | 29.11070085 | 96.35861427 |
| Zn | 19.58550917 | 30.06787137 | 93.91196488 |
| O  | 19.59955189 | 30.07638428 | 96.09716230 |
| Zn | 21.27636243 | 29.11649117 | 96.32970186 |
| Zn | 22.94895153 | 30.06895164 | 93.90366989 |
| O  | 22.93508257 | 30.10321315 | 96.09828643 |
| Zn | 24.60930050 | 29.09982930 | 96.31758896 |
| Zn | 26.35167883 | 30.09884259 | 93.99578136 |
| O  | 26.23641402 | 30.09634762 | 96.06393533 |
| Zn | 27.74223791 | 29.04304546 | 97.03959657 |
| Zn | 4.68317532  | 33.08934541 | 94.07267208 |
| O  | 4.45511431  | 32.95122116 | 96.02980550 |
| Zn | 6.08882558  | 31.98143291 | 96.45528264 |
| Zn | 7.85515334  | 32.98547112 | 93.94903413 |
| O  | 7.79323663  | 33.02212127 | 96.13237432 |
| Zn | 9.46784441  | 32.05419964 | 96.26390705 |
| Zn | 11.22462677 | 32.97974521 | 93.90216580 |
| O  | 11.20247760 | 32.95135360 | 96.09710749 |
| Zn | 12.88628876 | 32.00849486 | 96.32937950 |
| Zn | 14.57886783 | 32.95696317 | 93.91595977 |
| O  | 14.56822181 | 32.96707713 | 96.10279021 |
| Zn | 16.24633335 | 32.00088268 | 96.40640184 |
| Zn | 17.91382270 | 32.95696135 | 93.91596658 |
| O  | 17.92446645 | 32.96707114 | 96.10279279 |
| Zn | 19.60638944 | 32.00849153 | 96.32937356 |
| Zn | 21.26806823 | 32.97973336 | 93.90217470 |
| O  | 21.29021493 | 32.95133778 | 96.09711580 |
| Zn | 23.02484327 | 32.05418226 | 96.26392223 |
| Zn | 24.63753630 | 32.98546464 | 93.94904575 |
| O  | 24.69945099 | 33.02211047 | 96.13238235 |
| Zn | 26.40386000 | 31.98142404 | 96.45529160 |

|    |             |             |             |
|----|-------------|-------------|-------------|
| Zn | 27.80950372 | 33.08934245 | 94.07270340 |
| O  | 28.03756596 | 32.95122234 | 96.02983001 |
| Zn | 4.85485196  | 34.71887367 | 96.43678615 |
| Zn | 6.17997653  | 35.68280215 | 94.07281206 |
| O  | 6.18528465  | 35.94942824 | 96.02973848 |
| Zn | 7.84128579  | 35.01834164 | 96.45668522 |
| Zn | 9.49738102  | 35.91289919 | 93.99384288 |
| O  | 9.55833546  | 35.81457427 | 96.06322016 |
| Zn | 11.23469321 | 34.90310797 | 96.31081074 |
| Zn | 12.89139404 | 35.87661235 | 93.91201423 |
| O  | 12.91597903 | 35.86554019 | 96.10832175 |
| Zn | 14.57564943 | 34.90249490 | 96.28984378 |
| Zn | 16.24633895 | 35.88151245 | 93.89991457 |
| O  | 16.24633999 | 35.86162788 | 96.09947692 |
| Zn | 17.91702189 | 34.90248786 | 96.28984475 |
| Zn | 19.60129219 | 35.87659684 | 93.91202568 |
| O  | 19.57670474 | 35.86551486 | 96.10833777 |
| Zn | 21.25799069 | 34.90308984 | 96.31085166 |
| Zn | 22.99529572 | 35.91288798 | 93.99385410 |
| O  | 22.93434420 | 35.81456839 | 96.06322731 |
| Zn | 24.65138993 | 35.01832006 | 96.45667393 |
| Zn | 26.31270639 | 35.68279683 | 94.07283490 |
| O  | 26.30738598 | 35.94942033 | 96.02975107 |
| Zn | 27.63782171 | 34.71887254 | 96.43682340 |
| Zn | 9.69601714  | 37.65536363 | 97.01793428 |
| Zn | 11.05508512 | 38.41723856 | 94.25770509 |
| O  | 11.15361513 | 38.65485410 | 96.15061962 |
| Zn | 12.83453598 | 37.84184176 | 96.43554446 |
| Zn | 14.50075468 | 38.80317086 | 93.99697551 |
| O  | 14.53979525 | 38.72836779 | 96.15751847 |
| Zn | 16.24632864 | 37.81625297 | 96.29458090 |
| Zn | 17.99191062 | 38.80314632 | 93.99695862 |
| O  | 17.95288177 | 38.72834706 | 96.15752637 |
| Zn | 19.65813817 | 37.84181255 | 96.43555254 |
| Zn | 21.43760225 | 38.41723814 | 94.25771878 |
| O  | 21.33903881 | 38.65486813 | 96.15062668 |
| Zn | 22.79654123 | 37.65531033 | 97.01803509 |
| Zn | 14.65739248 | 40.68046140 | 96.58124864 |
| Zn | 16.24630232 | 41.33068694 | 94.19725530 |
| O  | 16.24633227 | 41.63456616 | 96.11856701 |
| Zn | 17.83526074 | 40.68042364 | 96.58112328 |
